# Supplementary material for: MYC regulates ribosome biogenesis and mitochondrial gene expression programs through its interaction with host cell factor–1
Source: eLife. 2021 Jan 8;10:e60191. doi: 10.7554/eLife.60191 (PMC7793627; doi:10.7554/eLife.60191)
Supplement: Figure 1—source data 1. [file elife-60191-fig1-data1.xlsx]

## Sheet: Figure 1H
	WT			4A			VP16 HBM
Day	rep1	rep2	rep3	rep1	rep2	rep3	rep1	rep2	rep3
0	6.9	6.6	5.1	3.6	2.3	2.9	6.4	5.3	4.8
1	100	100	100	100	100	100	100	100	100
4	97.5	101.4	95.1	103.6	94.4	95.3	100.4	103.5	102
7	96.2	99.3	92.6	96.7	86.7	87.8	102	104.4	104.4
10	94.6	98.9	90.9	87.8	81.9	80.4	106	109.9	106.7
13	95.8	97	91.5	77.6	72.8	71.1	110.9	112.6	110.3
16	96.7	96.1	92.6	64.7	63.8	64.5	112.9	115.9	114.1
19	94.6	96.8	90.4	54.4	53.4	50.4	116.7	118.3	116.7
22	93.5	95.9	89.6	44.2	44.5	40.2	122	125.4	117.1
25	91.5	93.6	87.4	36.5	33.3	29.6	122.2	127.4	121

## Sheet: Figure 1-S2C
	WT			4A			VP16 HBM
Day	rep1	rep2	rep3	rep1	rep2	rep3	rep1	rep2	rep3
1	0.02	0.02	0.02	0.02	0.02	0.02	0.02	0.02	0.02
4	0.1725	0.155	0.1575	0.17	0.1475	0.1475	0.18	0.185	0.2125
7	1.215	1.185	1.2975	0.99	0.91125	0.9525	1.63125	1.55625	1.63125
