# Supplementary material for: MYC regulates ribosome biogenesis and mitochondrial gene expression programs through its interaction with host cell factor–1
Source: eLife. 2021 Jan 8;10:e60191. doi: 10.7554/eLife.60191 (PMC7793627; doi:10.7554/eLife.60191)
Supplement: Figure 2—source data 1. [file elife-60191-fig2-data1.xlsx]

## Sheet: WT vs. 4A
Compound	Compound ID	Description	Anova (p)_WTvs4A	Max Fold Change_WTvs4A
1.44_182.0813m/z	HMDB0000158	L-Tyrosine	8.56e-07	1.63059
2.42_165.0790n	HMDB0000159	L-Phenylalanine	1.93e-06	1.68157
1.09_125.0147n	HMDB0000251	Taurine	8.28e-08	-1.76784
3.56_232.1544m/z	HMDB0000736	Isobutyryl-L-carnitine	3.03e-06	-1.57796
3.97_204.0901n	HMDB0000929	L-Tryptophan	6.86e-07	1.74255
1.08_110.0271m/z	HMDB0000965	Hypotaurine	7.5e-07	-1.58045
0.98_203.2232m/z	HMDB0001256	Spermine	0.0324237	-1.75191
0.94_89.1073m/z	HMDB0001414	Putrescine	5.11e-06	-2.44949
3.33_232.1545m/z	HMDB0002013	Butyrylcarnitine	3.29e-07	-1.70989
4.35_191.0617n	HMDB0011745	N-Acetyl-L-methionine	9.79e-05	-1.51243
16.19_200.2010m/z	4266216	dodecanamide	0.0178545	-1.5793
19.26_353.3294n	7850590	Anandamide (20:l, n-9)	0.0458537	-3.18784
17.85_531.3326n	7850608	PC(19:3(10Z,13Z,16Z)/0:0)	0.00025623	-1.52996
16.60_313.2736m/z	7982755	18-oxo-nonadecanoic acid	0.000354497	1.56219
13.24_184.1697m/z	7982825	11-amino-undecanoic acid	2.89e-05	61.4846
16.99_468.3451m/z	14713946	PC(O-15:0/0:0)	0.0011433	-1.71765
17.85_481.3533n	14713947	PC(O-16:0/0:0)	2.58e-05	-2.12902
18.67_468.3451m/z	74380438	PE(O-18:0/0:0)	6.88e-06	-1.83749
17.53_466.3294m/z	74380439	PE(O-18:1(9Z)/0:0)	1.68e-05	-1.58828
1.72_639.0978m/z	85296110	Myricetin 3-(4''-galloylrhamnoside)	0.00484526	1.66986
1.11_347.0630n	HMDB0000045	Adenosine monophosphate	0.00105682	1.78617
1.09_132.0768m/z	HMDB0000064	Creatine	4.79e-08	-1.60036
1.44_136.0758m/z	HMDB0000073	Dopamine	5.35e-06	1.60069
1.61_131.0946n	HMDB0000172	L-Isoleucine	4.67e-06	1.52534
0.97_156.0768m/z	HMDB0000177	L-Histidine	3.43e-06	1.5384
1.16_133.0376n	HMDB0000191	L-Aspartic acid	2.25e-07	-1.81762
1.18_204.1232m/z	HMDB0000201	L-Acetylcarnitine	1.57e-06	-1.73713
1.43_97.0761m/z	HMDB0000323	3-Amino-2-piperidone	0.00171618	1.73688
5.44_246.1701m/z	HMDB0000378	2-Methylbutyroylcarnitine	4.65e-07	1.8599
1.72_131.0946n	HMDB0000687	L-Leucine	4.6e-06	1.55608
5.23_246.1702m/z	HMDB0000688	Isovalerylcarnitine	6.73e-08	-2.32644
1.43_150.0584m/z	HMDB0000696	L-Methionine	2.67e-06	1.58379
23.64_538.5196m/z	HMDB0000790	N-Palmitoylsphingosine	0.0101979	-5.02701
1.16_176.0434n_2	HMDB0000828	Ureidosuccinic acid	2.05e-07	-1.97943
1.08_176.1030m/z	HMDB0000904	Citrulline	0.000434665	1.55916
1.06_194.0328m/z	HMDB0001511	Phosphocreatine	0.000292895	1.69644
1.12_175.0594n	HMDB0003157	Guanidinosuccinic acid	6.94e-09	-3.30233
1.59_124.0870m/z	HMDB0003431	L-Histidinol	0.000217167	6.31799
2.43_103.0543m/z	HMDB0006236	Phenylacetaldehyde	3.37e-06	1.71923
17.86_678.5070m/z	HMDB0007866	PC(14:0/14:0)	0.0196652	-5.35041
20.74_510.3921m/z	HMDB0011149	LysoPC(O-18:0)	0.000148318	-1.82012
16.60_453.2854n	HMDB0011473	LysoPE(0:0/16:0)	0.000154714	1.67739
12.38_243.1836n	HMDB0013286	N-Undecanoylglycine	0.0141497	-1.83533
4.35_150.0584m/z	HMDB0014997	Penicillamine	0.000254141	-1.51795
1.95_201.0693m/z	HMDB0029014	Prolyl-Cysteine	0.00334801	1.7542
13.47_477.3665m/z	HMDB0030271	Dehydrocarpaine I	0.0110013	-3.15983
16.25_310.3217m/z	HMDB0031203	N-Heptanoylsolamine	0.00943438	2.56077
1.15_193.0374m/z	HMDB0031950	L-2-Aminoethyl seryl phosphate	0.00448322	3.32779
1.24_150.0584m/z	HMDB0033951	Racemethionine	9.5e-06	1.66929
1.61_86.0964m/z	HMDB0034301	Piperidine	4.43e-06	1.52826
13.05_215.1280m/z	HMDB0034750	Isopentyl beta-D-glucoside	0.000607486	2.26363
16.60_957.5942m/z	HMDB0041365	25-Acetylvulgaroside	0.00406746	1.79379
17.01_468.3087m/z	HMDB0061691	1-Heptadecanoylglycerophosphoethanolamine	0.000595675	-1.50289
1.42_204.1231m/z	HMDB0062176	N-lactoyl-Leucine	1.6e-07	-1.9138
1.09_664.1165m/z	NAD	NAD	2.25e-06	-6.74895
1.44_183.0846m/z	HMDB0037764	S-[1-[2-(Acetyloxy)ethyl]butyl] ethanethioate	9.84e-07	1.66217
1.07_273.0186m/z	80-09-1	4,4'-Sulfonylbisphenol	0.0164762	-2.48594
1.16_377.0591m/z	98-71-5	4-Hydrazinobenzenesulfonic acid	1.65e-05	-2.70933
1.18_97.0761m/z	1739-84-0	1,2-Dimethylimidazole	0.000972014	1.89305
7.08_192.1231m/z	6976-37-0	2,2-Bis[hydroxymethyl]-2,2',2''-nitrilotriethanol	0.0106245	-1.58034
1.06_355.0515m/z	14293-44-8	Xipamide	0.00021058	2.01816
1.06_392.0001n	24386-93-4	5-Iodotubercidin	3.91e-05	1.82792
11.82_191.1643m/z	29911-28-2	Di(propylene glycol) butyl ether	0.000377737	1.61777
1.06_518.9270m/z	41205-21-4	Fluoromide	0.00326177	2.08897
4.35_194.0648m/z	63107-40-4	S-(2-Boronoethyl)-L-cysteine	0.000116048	-1.5194
1.15_302.0653m/z	72877-50-0	(-)-Neplanocin A	1.29e-07	-2.8855
1.07_450.9557n	298217-76-2	4-Bromo-N-(4-((2,4-dichlorobenzyl)oxy)benzylidene)-2-fluoroaniline	0.00124689	-2.26332
1.14_326.0306m/z	298218-03-8	N-(3-Nitrophenyl)-2-((4-methyl-5-(trifluoromethyl)-4H-1,2,4-triazol-3-yl)thio)acetamide	0.000463168	-2.19012
1.18_156.0850m/z	1037593-69-3	Homocysteine, butyl ester	0.000901676	2.35915
16.34_480.2723m/z	14714377	PS(16:0/0:0)	0.00221958	-2.0013
16.18_378.3155m/z	24702245	Leptinidine	5.16e-05	-1.91859
1.43_455.1441m/z	135636291	5-iodo-4-hydroxy-docosa-7Z,10Z,13Z,16Z,19Z-pentaenoic acid delta lactone	0.000985081	1.55065
16.59_294.2065m/z	332976959	6-Keto-decanoylcarnitine	5.59e-05	3.43081
20.01_317.3051m/z	332977093	1-Hexadecylglycerol	1.99e-06	-5.00175
1.14_223.0479m/z	Barbital 15196	Barbital	0.00793956	5.94388
1.44_166.0581m/z	Cyclocreatine 24424	Cyclocreatine	1.05e-05	1.94227
0.97_305.1483m/z	Desmethyl fluvoxamine 15961	Desmethyl fluvoxamine	0.0294509	-8.05683
12.87_550.2802m/z	Doramapimod 29019	Doramapimod	0.00287785	1.5453
1.16_292.1139m/z	Glu Ser Gly 4456	Glu Ser Gly	7.16e-06	-1.77676
1.08_258.1103m/z	HMDB0000086	Glycerophosphocholine	0.00513265	-1.55679
15.44_299.2826n	HMDB0000252	Sphingosine	0.000138734	-1.57265
1.08_441.1761m/z	HMDB0000472	5-Hydroxy-L-tryptophan	0.0081559	-1.99597
1.07_235.0216m/z	HMDB0000625	Gluconic acid	2.21e-06	3.89791
4.91_218.1389m/z	HMDB0000824	Propionylcarnitine	0.0001006	-2.77762
3.63_169.0472m/z	HMDB0000858	Monomethyl glutaric acid	0.00199449	-2.35664
1.09_158.0924m/z	HMDB0000904	Citrulline	0.00246857	2.26819
1.15_160.1332m/z	HMDB0000991	DL-2-Aminooctanoic acid	1.46e-06	-1.6456
1.13_465.9927m/z	HMDB0001341	ADP	3.93e-05	1.69141
1.09_166.0533m/z	HMDB0002005	Methionine sulfoxide	0.0230771	1.58391
1.90_125.1074m/z	HMDB0002038	N(6)-Methyllysine	4.98e-05	3.12487
1.20_250.0381m/z	HMDB0002062	Norepinephrine sulfate	0.00928257	1.62794
1.11_131.1179m/z	HMDB0002064	N-Acetylputrescine	9.77e-08	-2.22729
1.44_164.0474n	HMDB0002641	2-Hydroxycinnamic acid	1.85e-06	1.63854
1.06_214.0589m/z	HMDB0003148	Argininic acid	0.000734736	1.7971
1.25_151.0618m/z	HMDB0003162	7-Methylhypoxanthine	2.31e-05	1.71723
1.61_175.1078m/z	HMDB0003357	N-Acetylornithine	0.00206233	1.68396
3.97_188.0707m/z	HMDB0004096	5-Methoxyindoleacetate	1.3e-06	1.70717
22.63_742.5378m/z	HMDB0008996	PE(18:0/18:3(9Z,12Z,15Z))	0.0335838	-3.40621
16.09_482.3244m/z	HMDB0010381	LysoPC(15:0)	0.00219391	1.5211
15.10_502.2930m/z	HMDB0011488	LysoPE(0:0/20:4(8Z,11Z,14Z,17Z))	0.0388186	-1.82388
14.43_528.3088m/z	HMDB0011494	LysoPE(0:0/22:5(4Z,7Z,10Z,13Z,16Z))	0.00550364	-3.83992
15.39_528.3091m/z	HMDB0011495	LysoPE(0:0/22:5(7Z,10Z,13Z,16Z,19Z))	0.0250075	-1.80469
15.84_451.2699n	HMDB0011504	LysoPE(16:1(9Z)/0:0)	0.00194567	-1.56825
15.94_480.3088m/z	HMDB0011506	LysoPE(18:1(9Z)/0:0)	0.00515618	-2.92125
18.56_534.3557m/z	HMDB0011522	LysoPE(22:2(13Z,16Z)/0:0)	7.59e-05	-1.67349
15.86_530.3245m/z	HMDB0011523	LysoPE(22:4(7Z,10Z,13Z,16Z)/0:0)	0.0047163	-3.41758
17.33_328.3211m/z	HMDB0013078	Stearoylethanolamide	0.0132402	1.72085
14.03_272.2222m/z	HMDB0013317	Tridecanoylglycine	0.00685725	-1.6104
5.93_225.1598m/z	HMDB0014539	Carisoprodol	0.0248662	1.95411
1.43_241.1547m/z	HMDB0015407	Pirbuterol	4.54e-08	-1.96251
3.93_200.1394m/z	HMDB0028692	Alanyl-Lysine	5.28e-05	3.81416
1.15_193.0642m/z	HMDB0028768	Cysteinyl-Alanine	0.0129101	1.88713
6.01_209.1286m/z	HMDB0028867	Hydroxyprolyl-Leucine	0.0027353	2.59826
1.45_213.1234m/z	HMDB0028876	Hydroxyprolyl-Valine	1.36e-07	-1.83788
9.02_248.1494m/z	HMDB0028890	Histidinyl-Lysine	0.00184028	2.63239
1.01_355.1547m/z	HMDB0029094	Tryptophyl-Tryptophan	1.08e-07	29.4598
1.06_89.0710m/z	HMDB0029198	Dimethylurea	0.000306894	2.0863
1.14_113.0709m/z	HMDB0029396	L-cis-3-Amino-2-pyrrolidinecarboxylic acid	0.0228023	1.95945
1.59_225.0871m/z	HMDB0029397	L-Nicotianine	0.0381329	1.65249
0.93_217.9891m/z	HMDB0029415	S-Carboxymethyl-L-cysteine	0.0350308	-1.59563
1.43_104.0528m/z	HMDB0031682	(Â±)-2-Methylthiazolidine	3.73e-06	1.64297
1.25_104.0529m/z	HMDB0031682	(Â±)-2-Methylthiazolidine	0.000128872	1.73116
1.08_315.1428m/z	HMDB0032003	Eremopetasin sulfoxide	9.05e-05	-1.63266
1.16_131.0452m/z	HMDB0032332	Hydroxylated lecithin	4.97e-05	-2.04926
3.97_206.1007m/z	HMDB0032421	2-(4-Methyl-5-thiazolyl)ethyl hexanoate	2.98e-06	1.70297
3.34_157.0836m/z	HMDB0032478	Polypropylene glycol (m w 1,200-3,000)	0.00124529	1.65367
11.17_281.0997m/z	HMDB0032527	1,1'-(Tetrahydro-6a-hydroxy-2,3a,5-trimethylfuro[2,3-d]-1,3-dioxole-2,5-diyl)bis-ethanone	0.000110153	6.80405
1.47_366.1331m/z	HMDB0032878	13-Oxocryptopine	0.0287589	1.57704
8.33_162.1257n	HMDB0033625	(3R,7R)-1,3,7-Octanetriol	4.18e-05	2.21594
1.06_164.9813m/z	HMDB0033695	Poppy acid	0.000111586	-2.00132
3.60_364.1173m/z	HMDB0034363	Monocrotaline	0.00397101	-1.77033
2.42_148.0525n	HMDB0036626	3,4-Dihydro-2H-1-benzopyran-2-one	1.42e-06	1.68974
1.43_133.0318m/z	HMDB0037115	(Â±)-2-Hydroxy-4-(methylthio)butanoic acid	2.19e-06	1.57464
1.25_133.0318m/z	HMDB0037115	(Â±)-2-Hydroxy-4-(methylthio)butanoic acid	5.03e-05	1.71154
3.56_233.1578m/z	HMDB0037766	3-Mercaptohexyl hexanoate	4.11e-06	-1.58004
2.42_167.0897m/z	HMDB0038183	3-(4-Methyl-3-pentenyl)thiophene	2.99e-06	1.66005
1.71_133.1080m/z	HMDB0039228	(3-Aminopropoxy)guanidine	0.000280744	1.57219
1.03_231.9886m/z	HMDB0041624	Phosphocreatinine	1.68e-05	1.54704
1.43_230.1864m/z	HMDB0041947	N1,N8-Diacetylspermidine	2.49e-07	2.03178
1.04_248.9329m/z	HMDB0060363	2,5-Dichloro-4-oxohex-2-enedioate	1.65e-06	-3.05811
1.14_376.1033m/z	HMDB0061100	6-oxo-famciclovir	0.00623003	4.64674
1.06_369.2498m/z	HMDB0061384	N-(3-acetamidopropyl)pyrrolidin-2-one	0.000255994	-2.0636
1.48_111.0917m/z	HMDB0061870	N-Methylene-ethenamine	0.00338844	1.88029
1.44_503.1509m/z	HMDB0130128	3,4,5-trihydroxy-6-{[8-(2-hydroxypropan-2-yl)-2-oxo-4-propyl-2H,8H,9H-furo[2,3-h]chromen-5-yl]oxy}oxane-2-carboxylic acid	5.33e-06	2.05125
23.07_321.3151m/z	LMFA04000085	17Z-Docosenoic acid	0.0495479	-4.67753
17.15_400.3342n	LMST01010395	(24E),26-hydroxydesmosterol	0.000177898	1.88353
20.25_383.3308m/z	LMST01010395	(24E),26-hydroxydesmosterol	0.00018001	1.89695
1.42_255.0810m/z	391-94-6	5'-Fluoro-2'-hydroxy-4-methoxychalcone	0.0160304	2.76318
1.45_427.1506m/z	1665-56-1	5a,6-Anhydrotetracycline	0.00319777	1.97042
1.72_86.0964m/z	2508-29-4	Pentanol, 5-amino-	4.03e-06	1.56523
4.35_193.0724m/z	3034-50-2	4-Imidazolecarboxaldehyde	0.000183658	-1.52409
1.16_194.0483m/z	7365-44-8	N-Tris(hydroxymethyl)methyl-2-aminoethanesulfonic acid	1.37e-06	2.16285
1.42_379.1281m/z	19685-10-0	10-Methoxycamptothecin	0.0498609	1.82086
2.40_339.2155m/z	22131-35-7	Butalamine	7.7e-06	1.58442
1.16_375.0758m/z	83055-99-6	Bensulfuron-methyl	2.15e-07	-3.80295
5.44_247.1735m/z	116296-31-2	3-Thiatetradecanoic Acid	6.17e-07	1.87128
5.23_247.1735m/z	116296-31-2	3-Thiatetradecanoic Acid	8.11e-08	-2.41698
1.59_305.1708m/z	138387-16-3	Doxepin-d3	8.23e-05	-1.91497
15.56_304.3000m/z	213182-22-0	N-[(1R)-2-Hydroxy-1-methylethyl-9Z-octadecenamide	0.00973626	1.59615
14.61_271.2512n	7982837	2R-aminohexadecanoic acid	0.0149803	1.80387
20.30_343.2859m/z	24701281	PGF1a alcohol	0.0162455	-4.88912
17.00_378.3155m/z	24702244	Etioline	0.00066615	-1.72876
16.88_492.3086m/z	123063865	PS(P-18:0/0:0)	0.000150855	-1.55193
1.43_470.1439m/z	Bucladesine 17693	Bucladesine	0.00190355	-1.66481
1.10_253.0325m/z	Etanidazole 24447	Etanidazole	0.0370773	-11.3494
1.13_291.1300m/z	HMDB0000052	Argininosuccinic acid	0.000368344	-2.86334
1.06_261.0308m/z	HMDB0000099	L-Cystathionine	0.000316033	2.12812
1.07_210.9769m/z	HMDB0000126	Glycerol 3-phosphate	0.000446684	-331.629
1.13_173.0211m/z	HMDB0000126	Glycerol 3-phosphate	4.67e-08	-38.5239
3.98_159.0918m/z	HMDB0000259	Serotonin	1.06e-05	1.62738
2.42_120.0808m/z	HMDB0000306	Tyramine	1.67e-06	1.68083
1.06_170.0215m/z	HMDB0000370	2-Amino-3-phosphonopropionic acid	0.000270378	1.51247
1.02_189.1347m/z	HMDB0000670	Homo-L-arginine	0.00141336	-1.50074
1.16_178.0540m/z	HMDB0001015	N-Formyl-L-methionine	1.77e-06	-1.78606
1.15_341.0034m/z	HMDB0001112	D-Glyceraldehyde 3-phosphate	0.000461429	2.49788
1.55_283.0926m/z	HMDB0001280	2-Aminomuconic acid semialdehyde	0.00496019	2.39641
1.25_341.0034m/z	HMDB0001473	Dihydroxyacetone phosphate	0.0249674	1.74978
16.00_299.2825n	HMDB0001480	3-Dehydrosphinganine	0.00795704	1.8847
1.44_91.0543m/z	HMDB0001858	p-Cresol	0.00255678	2.20115
1.08_143.0486m/z	HMDB0002040	4-Methoxycinnamic acid	1.3e-07	-1.83535
1.43_264.0715m/z	HMDB0002044	8-Hydroxyguanosine	1.98e-07	1.63424
2.43_250.0388m/z	HMDB0002062	Norepinephrine sulfate	1.76e-06	1.548
1.59_351.1762m/z	HMDB0002201	N-Carboxyethyl-g-aminobutyric acid	0.0107772	1.65704
12.19_87.0441m/z	HMDB0002523	Oxolan-3-one	2.11e-06	15.1921
1.12_175.1078m/z	HMDB0003357	N-Acetylornithine	4.4e-05	1.60731
1.85_157.0973m/z	HMDB0003357	N-Acetylornithine	0.0146459	1.87971
1.16_88.0393m/z	HMDB0003609	2-Aminoacrylic acid	1.17e-06	-1.55123
1.46_320.0913m/z	HMDB0004662	S-(Hydroxymethyl)glutathione	6.25e-05	2.96423
17.28_690.5072m/z	HMDB0008956	PE(16:1(9Z)/16:0)	0.0098774	-5.18005
19.90_716.5228m/z	HMDB0008959	PE(16:1(9Z)/18:1(11Z))	0.0201488	-5.42209
18.74_716.5229m/z	HMDB0008960	PE(16:1(9Z)/18:1(9Z))	0.0087915	-5.4312
20.92_741.5310n	HMDB0008996	PE(18:0/18:3(9Z,12Z,15Z))	0.00558731	-4.63312
20.50_766.5378m/z	HMDB0009005	PE(18:0/20:5(5Z,8Z,11Z,14Z,17Z))	0.00247122	-3.4604
18.23_766.5380m/z	HMDB0009037	PE(18:1(11Z)/20:4(8Z,11Z,14Z,17Z))	0.00627124	-4.46895
3.51_261.1447m/z	HMDB0011170	gamma-Glutamylisoleucine	0.000462352	-1.68435
1.22_213.1234m/z	HMDB0011180	L-prolyl-L-proline	0.000417771	-1.81842
21.80_749.5361n	HMDB0011360	PE(P-16:0/22:5(7Z,10Z,13Z,16Z,19Z))	0.00644878	-5.8167
1.10_183.0864m/z	HMDB0011632	L-Iditol	1.69e-05	-2.20272
1.57_257.1133m/z	HMDB0011648	1-(beta-D-Ribofuranosyl)-1,4-dihydronicotinamide	1.13e-05	-2.04313
1.44_123.0442m/z	HMDB0011718	4-Hydroxybenzaldehyde	1.47e-05	1.5566
1.13_277.1032m/z	HMDB0011737	gamma-Glutamylglutamic acid	9.67e-05	1.86327
3.68_139.1230m/z	HMDB0012497	1-Pyrroline	0.000104119	2.68374
2.43_168.0929m/z	HMDB0013318	Tryptophanamide	5.74e-07	1.6906
1.11_323.1198m/z	HMDB0013938	Promazine 5-sulfoxide	4.08e-06	-4.14726
10.29_331.2051m/z	HMDB0014452	Bexarotene	0.00137111	-2.55318
1.45_227.1391m/z	HMDB0014457	Pentobarbital	2.55e-07	-3.84641
3.96_411.1986n	HMDB0015196	Acetophenazine	1.15e-05	1.66008
1.12_333.0636m/z	HMDB0015413	Sulfadoxine	8.91e-05	-20.635
6.41_203.1392m/z	HMDB0028690	Alanyl-Isoleucine	0.0305214	3.26423
2.14_200.1395m/z	HMDB0028944	Lysyl-Alanine	0.000188579	3.75657
4.57_231.1705m/z	HMDB0029131	Valyl-Leucine	0.000476807	-1.53187
7.57_144.1151n	HMDB0030368	(3R,5Z)-5-Octene-1,3-diol	5.35e-05	2.19049
1.22_208.0639m/z	HMDB0030411	(2R,2'S)-Isobuteine	0.000260205	-1.79436
1.12_74.0965m/z	HMDB0031321	1-Butylamine	0.0460822	1.80121
1.18_72.0809m/z	HMDB0031641	Pyrrolidine	1.07e-06	1.63272
7.56_167.1043m/z	HMDB0032046	Isopropyl 3-methylbutanoate	0.00191729	1.54557
4.35_237.1269m/z	HMDB0032058	Isoeugenol benzyl ether	0.000688648	-1.74728
17.41_317.3051m/z	HMDB0032112	1,2,4-Nonadecanetriol	3.36e-06	-2.45177
4.91_183.1017m/z	HMDB0032607	(Â±)-threo-Anethole glycol	0.000115069	-2.47012
1.47_485.1925m/z	HMDB0032760	Nb-trans-p-Coumaroylserotonin glucoside	2.24e-07	-2.11879
11.46_283.1153m/z	HMDB0032857	Glycerol tripropanoate	0.00165079	2.36046
1.44_119.0492m/z	HMDB0032929	Benzofuran	6.45e-05	1.78324
1.45_371.1450m/z	HMDB0033019	7-Hydroxyterpineol 8-glucoside	0.000118498	2.0542
1.15_95.0604m/z	HMDB0033112	Methylpyrazine	0.00570494	3.49629
1.43_95.0604m/z	HMDB0033112	Methylpyrazine	0.000607523	2.41283
12.19_204.1363n	HMDB0033217	(2xi,6xi)-7-Methyl-3-methylene-1,2,6,7-octanetetrol	2.02e-06	18.66
1.13_118.1226m/z	HMDB0033971	2-Diethylaminoethanol	0.0483078	2.01716
1.10_397.1653m/z	HMDB0034217	Harmol	3.34e-10	25.4183
16.86_277.1800m/z	HMDB0035722	Tanacetol A	0.000132829	1.55798
1.13_503.0844m/z	HMDB0037757	3',4',5-Trihydroxy-3-methoxy-6,7-methylenedioxyflavone 4'-glucuronide	0.0244598	1.67243
11.47_276.1443m/z	HMDB0037840	N-(1-Deoxy-1-fructosyl)leucine	0.000419985	7.9285
1.48_517.2620m/z	HMDB0038029	Eriojaposide B	0.000745906	-3.1832
1.09_558.1186n	HMDB0038392	Dihydromorelloflavone	3.2e-05	-2.53706
1.15_194.0408m/z	HMDB0038434	7-Isothiocyanato-1-heptene	0.00677461	5.58651
1.76_219.1422m/z	HMDB0038945	(S)-3-Mercaptohexyl pentanoate	5.59e-08	-2.32547
16.61_267.1369m/z	HMDB0038995	(S)-17-Hydroxy-9,11,13,15-octadecatetraynoic acid	6.65e-05	1.58107
1.12_424.0851m/z	HMDB0039526	Sarafloxacin	5.12e-05	2.75888
11.17_276.1444m/z	HMDB0039780	N-(1-Deoxy-1-fructosyl)isoleucine	0.000104212	6.97104
1.46_125.0710m/z	HMDB0040143	2-Methoxy-6-methylpyrazine	0.000951706	3.83928
2.14_99.0441m/z	HMDB0040145	5-Hydroxy-4-pentenoic acid d-lactone	2.06e-07	-6.37751
16.59_981.5943m/z	HMDB0041587	Macrocarpal I	0.0269655	1.85161
1.05_224.9863m/z	HMDB0041706	Caffeic acid 3-sulfate	0.0013437	1.66663
1.13_428.1793m/z	HMDB0041907	Imidapril	9.11e-05	1.82535
1.17_178.0863m/z	HMDB0041943	N-Acetyldopamine	0.000571858	-1.57693
1.43_487.1672m/z	HMDB0041948	Nephritogenoside	0.000105152	1.61149
1.08_581.0992m/z	HMDB0059975	4-Hydroxy-5-(3'-hydroxyphenyl)-valeric acid-3'-O-sulphate	0.00356728	-3.56947
3.07_139.1230m/z	HMDB0060246	1-Pyrrolinium	0.000278331	2.74235
1.11_100.0757m/z	HMDB0060309	(2R)-2-Hydroxy-2-methylbutanenitrile	9e-08	15.7628
1.16_200.1030m/z	HMDB0060477	gamma-Glutamyl-beta-aminopropiononitrile	0.00237287	2.47298
1.06_185.1285m/z	HMDB0061384	N-(3-acetamidopropyl)pyrrolidin-2-one	0.000405503	-1.978
1.13_276.0248n	HMDB0062800	6-phosphonatooxy-D-gluconate	0.00132583	2.02214
1.75_157.0973m/z	HMDB0094702	Gly-Norvaline	0.00222257	1.89419
1.08_201.0540m/z	HMDB0128676	3-(6,7-dimethoxy-2H-1,3-benzodioxol-5-yl)prop-2-enal	8.56e-05	-1.56264
1.06_368.0186n	HMDB0130444	{3,5,6-trihydroxy-2-[3-(sulfooxy)phenyl]-7H-chromen-7-ylidene}oxidanium	0.000208335	-1.52621
1.60_377.1191m/z	HMDB0133001	3,4,5-trihydroxy-6-[4-(3-oxopentyl)phenoxy]oxane-2-carboxylic acid	1.59e-08	3.26386
1.06_354.0827m/z	HMDB0134940	5-[(6-carboxy-3,4,5-trihydroxyoxan-2-yl)oxy]-1H-indole-3-carboxylic acid	0.00521465	1.57333
1.16_391.0412m/z	HMDB0135538	3,4,5-trihydroxy-6-[(6-methyl-2-oxo-2H-chromen-5-yl)oxy]oxane-2-carboxylic acid	2.47e-06	-7.51992
1.41_148.0968m/z	HMDB0142963	2-amino-6-hydroxyhexanoic acid	0.000175166	1.51893
1.16_74.0237m/z	HMDB0143414	(hydroxymethyl)carbamic acid	0.000192712	-2.05479
1.08_280.1140m/z	Ser Ser Ser 4160	Ser Ser Ser	0.000338936	1.78669
11.92_276.1443m/z	Val Gly His 8302	Val Gly His	0.000440975	8.98222
1.43_471.1280m/z	19687-73-1	3-Amino-2-oxazolidinone, 2-nitrobenzaldehyde derivative	1.1e-05	2.26186
17.24_440.3137m/z	74380437	PE(O-16:0/0:0)	2.36e-05	-1.92351
1.07_205.0684m/z	HMDB0000765	Mannitol	0.00012928	-2.8118
15.91_305.2952m/z			0.00352865	1.8088
5.29_207.5759m/z			0.00340567	3.98075
5.06_130.1591m/z			0.0265827	1.6265
5.06_131.1624m/z			0.0294153	1.67034
15.84_454.2833m/z			5.78e-05	-1.8276
12.38_245.1942m/z			0.0131377	-1.8381
13.05_297.1310m/z			0.00113716	2.50673
13.04_292.1756m/z			0.000987688	2.50157
12.52_231.1836n			0.0163928	-2.45807
13.34_316.0651n			0.000726611	2.07401
11.46_278.1600m/z			0.00200006	2.34996
13.50_292.1755m/z			0.00393897	3.03284
13.48_273.2537m/z			0.00979581	-2.07481
13.47_268.1884m/z			0.00938673	-1.98262
13.47_228.1920n			0.01183	-2.00008
13.47_227.1887n			0.011611	-1.93361
12.19_222.1701m/z			1.98e-06	18.8689
8.33_180.1595m/z			1.65e-05	3.68098
15.13_255.2199n			0.0100293	-1.99127
17.85_484.3670m/z			2.87e-05	-2.08613
17.85_534.3463m/z			8.64e-05	-1.60855
20.31_351.2838n			0.012102	-4.41334
23.08_355.3681m/z			0.0421028	-4.31132
16.61_287.6502m/z			0.000332758	1.59624
16.60_456.2989m/z			0.000176281	1.67555
17.11_338.3529m/z			0.0100875	2.58766
16.94_499.7834m/z			0.00890896	-1.59031
16.69_324.3374m/z			0.00425747	2.30959
1.04_285.8952m/z			0.000432926	-1.55248
1.04_265.9232m/z			0.000205788	1.5992
1.04_416.8527n			0.000475421	-1.86507
1.04_332.8913n			2.91e-05	-1.74177
1.04_421.8699m/z			0.00211686	-1.85686
1.04_414.8548n			0.000248193	-1.58035
1.04_574.9045m/z			0.0143078	-1.66838
1.04_230.9581n			4.18e-06	-1.7841
1.04_248.9301n			2.17e-05	-1.72128
1.03_566.8038n			0.000162753	-1.763
1.04_330.8933n			2.53e-05	-1.56469
1.03_505.8316m/z			0.00104406	-1.72877
1.05_490.9432m/z			0.00848375	-1.53315
1.06_325.9411n			5.72e-05	-1.83718
1.06_169.9859m/z			0.000496029	-1.97648
1.06_366.9021m/z			5.03e-05	-2.32601
1.06_320.9420n			0.000385239	1.59195
1.06_463.9956n			0.000615257	1.81034
1.07_241.6348n			3.08e-08	-7.34753
1.07_412.9999n			4.32e-05	-2.60324
1.06_282.9860n			0.000177046	1.77612
1.06_149.9997m/z			0.000655413	-2.43455
1.06_173.0149m/z			0.000106177	1.61536
1.06_509.0073n			0.00304104	-1.6027
1.06_309.9672n			0.000134976	-2.96572
1.05_210.9708m/z			0.000177646	1.63109
1.05_195.9774m/z			0.00258282	1.60606
1.06_296.8975n			0.0139157	1.69294
1.05_167.9650m/z			0.000764633	1.53903
1.06_281.9310m/z			0.0258215	1.69141
1.06_407.9738n			0.00182594	1.87012
0.98_88.0870m/z			0.00855316	1.9931
0.86_217.2024m/z			0.00249946	2.50145
0.86_354.3187m/z			0.00433303	1.88953
0.98_89.0903m/z			0.00947357	2.18801
1.01_189.1792m/z			4.02e-05	1.52995
1.01_84.0114m/z			0.0261999	2.38032
1.01_546.8231m/z			0.0382384	-1.9699
0.99_87.0797n			0.00912548	2.38658
1.54_253.5724m/z			0.000279679	1.80603
1.52_247.0694n			1.33e-07	2.46109
1.65_176.0377m/z			0.00122075	2.18856
1.61_132.0736m/z			6.97e-05	1.60689
1.61_132.1302m/z			9e-05	1.59332
1.61_87.0998m/z			1.16e-05	1.506
1.61_133.1052m/z			3.06e-06	1.52721
1.59_125.0904m/z			0.000633287	9.57172
1.43_152.0541m/z			8.95e-06	1.64572
1.44_660.1731m/z			0.000368524	1.89124
1.44_467.6182m/z			0.0234285	1.86061
3.68_140.1264m/z			0.000119956	2.7348
3.34_152.1282m/z			0.00435615	1.54221
3.07_140.1264m/z			0.000234038	2.76193
2.42_121.0842m/z			4.4e-06	1.68065
1.76_195.1472n			1.25e-07	-2.14821
1.72_132.1302m/z			8.22e-06	1.60012
1.72_87.0998m/z			5.4e-06	1.54025
1.72_133.1052m/z			2.63e-06	1.56613
1.71_132.0735m/z			1.84e-05	1.60875
1.43_98.0794m/z			0.00188932	1.76293
1.13_223.9989m/z			0.00199133	-2.17682
1.11_332.5618m/z			5.14e-06	-6.21987
1.13_530.0243m/z			0.000124415	-1.82107
1.14_215.0924n			0.000492917	1.97695
1.10_531.1366m/z			0.00244086	1.97305
1.08_596.0743n			1.12e-07	-2.35677
1.08_375.0440n			0.000191756	-4.24677
1.07_394.0429m/z			3.62e-05	-30.8146
1.07_455.0855n			9.43e-05	-1.85099
1.07_471.0595n			0.000228387	-1.50295
1.09_127.0253m/z			1.43e-05	-2.094
1.09_433.1036n			2.67e-05	-1.86473
1.15_384.0780n			2.38e-07	-8.08416
1.15_254.0738n			0.00216648	3.14469
1.25_152.0542m/z			5.9e-06	1.73789
1.42_154.0743n			0.000436812	1.98717
1.17_302.1799m/z			5e-06	-2.1211
1.16_137.5210m/z			5.69e-06	-2.53946
1.16_135.0481m/z			5.92e-07	-1.96776
1.16_501.0866m/z			0.000224721	-2.24396
1.16_581.0528m/z			0.000520156	-1.88669
1.18_98.0794m/z			0.00173978	1.91285
1.19_423.1722m/z			8.16e-06	1.84422
1.18_154.0743n			0.000440224	2.27517

## Sheet: WT vs. VP16 HBM
Compound	Compound ID	Description	Anova (p)_WTvsVP	Max Fold Change_WTvsVP
3.56_232.1544m/z	HMDB0000736	Isobutyryl-L-carnitine	2.76e-05	1.64146
3.33_232.1545m/z	HMDB0002013	Butyrylcarnitine	1.21e-05	1.6515
16.66_426.3578m/z	HMDB0005065	Oleoylcarnitine	0.0221406	1.51832
16.19_200.2010m/z	4266216	dodecanamide	0.0475318	-1.53704
18.67_468.3451m/z	74380438	PE(O-18:0/0:0)	0.000141237	-1.8708
17.53_466.3294m/z	74380439	PE(O-18:1(9Z)/0:0)	3.79e-05	-1.92995
9.19_274.2014m/z	332976980	Heptanoylcarnitine	0.0452571	1.71212
1.11_347.0630n	HMDB0000045	Adenosine monophosphate	0.00164038	1.76376
1.16_133.0376n	HMDB0000191	L-Aspartic acid	1.17e-06	1.99903
5.23_246.1702m/z	HMDB0000688	Isovalerylcarnitine	3.04e-06	1.87644
1.16_176.0434n_2	HMDB0000828	Ureidosuccinic acid	5.2e-07	2.23061
1.49_375.1147m/z	HMDB0001013	Cotinine glucuronide	3.32e-07	2.18034
1.12_175.0594n	HMDB0003157	Guanidinosuccinic acid	1.02e-07	2.13288
1.59_124.0870m/z	HMDB0003431	L-Histidinol	0.000459686	3.43746
20.74_510.3921m/z	HMDB0011149	LysoPC(O-18:0)	0.00307067	-1.61614
1.15_193.0374m/z	HMDB0031950	L-2-Aminoethyl seryl phosphate	0.0202549	2.05193
1.09_664.1165m/z	NAD	NAD	4.97e-06	-3.47543
1.07_273.0186m/z	80-09-1	4,4'-Sulfonylbisphenol	1.53e-05	1.96784
1.15_302.0653m/z	72877-50-0	(-)-Neplanocin A	1.42e-06	2.37774
1.07_450.9557n	298217-76-2	4-Bromo-N-(4-((2,4-dichlorobenzyl)oxy)benzylidene)-2-fluoroaniline	0.00196982	1.54992
1.01_862.6029m/z	49703645	(3'-sulfo)Galbeta-Cer(d18:1/22:0(2OH))	0.017707	-1.91151
20.01_317.3051m/z	332977093	1-Hexadecylglycerol	5.05e-06	3.80086
3.89_304.1504m/z	Asp Gly Ile 8419	Asp Gly Ile	1.41e-05	1.58134
1.14_223.0479m/z	Barbital 15196	Barbital	0.0353552	2.70996
1.15_324.1038m/z	Cys Met Ala 11136	Cys Met Ala	9.12e-07	1.96474
1.16_292.1139m/z	Glu Ser Gly 4456	Glu Ser Gly	7.42e-06	1.80888
1.06_200.0685m/z	HMDB0000062	L-Carnitine	0.000848357	1.50767
1.16_205.0643m/z	HMDB0000099	L-Cystathionine	0.00287618	1.63512
1.14_157.0245m/z	HMDB0000226	Orotic acid	1.69e-06	1.92935
1.07_235.0216m/z	HMDB0000625	Gluconic acid	0.0285829	-1.61469
1.09_158.0924m/z	HMDB0000904	Citrulline	0.0022726	1.78495
1.15_160.1332m/z	HMDB0000991	DL-2-Aminooctanoic acid	1.93e-05	1.54204
1.13_273.0371m/z	HMDB0001068	D-Sedoheptulose 7-phosphate	0.000151064	-1.91401
6.48_758.9731m/z	HMDB0003665	Phosphoribosyl-ATP	0.0133223	1.6902
1.17_294.1296m/z	HMDB0011654	2-(3-Carboxy-3-(methylammonio)propyl)-L-histidine	0.000126127	1.88447
18.22_507.3691n	HMDB0013122	LysoPC(P-18:0)	0.00374241	-1.51995
5.93_225.1598m/z	HMDB0014539	Carisoprodol	0.000458553	2.20939
3.93_200.1394m/z	HMDB0028692	Alanyl-Lysine	0.00190942	1.81446
1.15_191.0485m/z	HMDB0028784	Cysteinyl-Serine	0.0363264	2.23159
1.01_355.1547m/z	HMDB0029094	Tryptophyl-Tryptophan	0.00304749	-1.86227
1.14_113.0709m/z	HMDB0029396	L-cis-3-Amino-2-pyrrolidinecarboxylic acid	0.0353683	1.72442
1.16_131.0452m/z	HMDB0032332	Hydroxylated lecithin	4.67e-07	2.09836
1.47_366.1331m/z	HMDB0032878	13-Oxocryptopine	0.0343185	1.704
3.60_364.1173m/z	HMDB0034363	Monocrotaline	0.0163522	-1.6285
3.56_233.1578m/z	HMDB0037766	3-Mercaptohexyl hexanoate	2.75e-05	1.64069
1.16_453.0752m/z	HMDB0041340	Benzofenap	3.44e-05	-4.84481
1.48_111.0917m/z	HMDB0061870	N-Methylene-ethenamine	0.0268612	1.59156
2.18_380.1486m/z	Met Glu Thr 10731	Met Glu Thr	0.00233736	3.73278
1.45_427.1506m/z	1665-56-1	5a,6-Anhydrotetracycline	0.00706812	1.58203
1.06_353.0519m/z	31966-52-6	8-Azidoadenosine-3',5'-cyclic monophosphate	0.00634134	1.50671
1.16_375.0758m/z	83055-99-6	Bensulfuron-methyl	4.12e-07	2.84838
5.23_247.1735m/z	116296-31-2	3-Thiatetradecanoic Acid	1.1e-06	1.9515
1.07_352.1245m/z	HMDB0000785	N-Acetyl-7-O-acetylneuraminic acid	0.000932812	-1.80258
1.16_178.0540m/z	HMDB0001015	N-Formyl-L-methionine	4.68e-07	2.09597
1.15_218.0425m/z	HMDB0001514	Glucosamine	0.000270772	-1.75799
1.43_264.0715m/z	HMDB0002044	8-Hydroxyguanosine	0.000204377	-1.61393
1.16_88.0393m/z	HMDB0003609	2-Aminoacrylic acid	2.67e-06	1.74849
1.46_320.0913m/z	HMDB0004662	S-(Hydroxymethyl)glutathione	0.0152235	1.53279
1.06_368.0984m/z	HMDB0013118	Xanthurenate-8-O-beta-D-glucoside	0.00223598	-1.67025
1.11_323.1198m/z	HMDB0013938	Promazine 5-sulfoxide	1.14e-06	2.09107
1.12_333.0636m/z	HMDB0015413	Sulfadoxine	6.14e-06	-6.82779
1.04_228.0373m/z	HMDB0028731	Asparaginyl-Glycine	0.0134143	1.57228
2.14_200.1395m/z	HMDB0028944	Lysyl-Alanine	0.000489248	1.9163
1.42_233.1133m/z	HMDB0029123	Valyl-Aspartate	3.86e-05	-1.84219
5.70_180.1020m/z	HMDB0029223	alpha-Methylphenylalanine	0.0188528	1.64155
1.15_308.1088m/z	HMDB0029450	Aspergillomarasmine A	0.00342121	1.7248
1.13_487.1164m/z	HMDB0029999	Cycloartomunoxanthone	0.0478307	1.89131
1.07_101.0710m/z	HMDB0031642	N-Nitroso-pyrrolidine	0.0188166	-1.99713
6.78_392.1486m/z	HMDB0033084	7-Hydroxydehydroglaucine	0.0147195	-1.98987
1.15_95.0604m/z	HMDB0033112	Methylpyrazine	0.0231921	2.1142
1.43_95.0604m/z	HMDB0033112	Methylpyrazine	0.00931832	1.66424
1.24_326.1016m/z	HMDB0033193	Avenanthramide L	0.000112221	1.76367
1.13_118.1226m/z	HMDB0033971	2-Diethylaminoethanol	0.0151415	1.70417
1.10_397.1653m/z	HMDB0034217	Harmol	1.39e-06	-6.70405
1.58_364.1172m/z	HMDB0034363	Monocrotaline	0.00590144	1.63008
1.13_408.0902m/z	HMDB0034674	(S)-2,3-Dihydro-3,5-dihydroxy-2-oxo-3-indoleacetic acid 5-glucoside	0.000259533	-1.60616
1.15_194.0408m/z	HMDB0038434	7-Isothiocyanato-1-heptene	0.0353533	2.57084
1.12_424.0851m/z	HMDB0039526	Sarafloxacin	0.00535981	-47.2385
1.46_125.0710m/z	HMDB0040143	2-Methoxy-6-methylpyrazine	0.0177688	1.81361
1.17_326.1451m/z	HMDB0041337	2-O-alpha-D-Galactopyranosyl-1-deoxynojirimycin	0.00103923	-1.70959
1.04_274.0428m/z	HMDB0060927	Hydroxylumiracoxib	0.00890687	1.52798
1.13_276.0248n	HMDB0062800	6-phosphonatooxy-D-gluconate	1.5e-05	-19.0846
6.48_759.1735m/z	HMDB0127342	6-[4-(5,7-dihydroxy-6-{4-hydroxy-6-methyl-5-oxo-3-[(3,4,5-trihydroxy-6-methyloxan-2-yl)oxy]oxan-2-yl}-4-oxo-4H-chromen-2-yl)phenoxy]-3,4,5-trihydroxyoxane-2-carboxylic acid	0.0146812	1.69967
1.60_377.1191m/z	HMDB0133001	3,4,5-trihydroxy-6-[4-(3-oxopentyl)phenoxy]oxane-2-carboxylic acid	2.25e-06	-2.14162
2.80_477.1756m/z	HMDB0134197	3,4,5-trihydroxy-6-[(16-hydroxy-3-methyl-1,7-dioxo-3,4,5,6,7,8,9,10-octahydro-1H-2-benzoxacyclotetradecin-14-yl)oxy]oxane-2-carboxylic acid	0.000122233	1.51516
1.16_391.0412m/z	HMDB0135538	3,4,5-trihydroxy-6-[(6-methyl-2-oxo-2H-chromen-5-yl)oxy]oxane-2-carboxylic acid	1.49e-05	2.56193
1.10_241.0853m/z	HMDB0135587	3-(3,4-dihydroxyphenyl)-1-phenylprop-2-en-1-one	0.00130643	1.5356
1.07_295.0572m/z	HMDB0142082	2-hydroxy-3-(2,3,4-trimethoxyphenyl)propanoic acid	0.0151446	1.65311
1.16_74.0237m/z	HMDB0143414	(hydroxymethyl)carbamic acid	6.27e-06	2.00152
1.08_280.1140m/z	Ser Ser Ser 4160	Ser Ser Ser	0.000464312	-1.88438
1.43_471.1280m/z	19687-73-1	3-Amino-2-oxazolidinone, 2-nitrobenzaldehyde derivative	9.85e-05	-1.5307
17.24_440.3137m/z	74380437	PE(O-16:0/0:0)	0.000322477	-1.7857
1.07_205.0684m/z	HMDB0000765	Mannitol	0.000669137	2.0354
1.06_341.3307m/z	L-CARNITINE - D9		0.00256188	-1.72587
6.47_948.7150m/z			0.0168766	1.68122
6.47_947.9636m/z			0.0169758	1.67384
6.48_758.7727m/z			0.00992838	1.71516
6.48_948.4645m/z			0.0115496	1.72287
6.48_948.2140m/z			0.0114073	1.71566
6.44_778.1351m/z			0.0149786	1.6175
6.44_777.8843m/z			0.0170547	1.6337
15.91_305.2952m/z			0.0407994	1.55894
5.29_207.5759m/z			0.0153217	2.40385
15.84_454.2833m/z			0.048249	-1.53581
18.21_510.3828m/z			0.00678296	-1.55739
17.39_508.3306m/z			0.0399563	-1.55819
16.73_298.3469m/z			0.000820071	15.896
1.04_502.7524m/z			0.0310482	1.64087
1.04_418.7909m/z			0.00679278	1.93772
1.04_196.9495n			5.69e-06	-1.60505
1.04_211.9080n			0.00414899	1.58376
1.04_351.9478n			9.22e-05	-1.61902
1.05_116.8909m/z			0.0251638	1.70267
1.05_73.9327n			0.0259966	1.51437
1.04_153.9493m/z			0.000605019	-1.53327
1.04_332.8320m/z			0.0159156	1.83174
1.04_461.7917n			0.00628727	1.90042
1.03_387.8613m/z			0.00328569	-1.6368
1.02_418.9534m/z			0.00403559	-1.53782
1.03_471.8228m/z			0.000470251	-2.23597
1.03_319.8740m/z			9.28e-05	-1.80799
1.03_595.8308m/z			0.00307931	-1.69748
1.06_354.9949m/z			0.00771166	1.89517
1.06_169.0254n			0.0205311	1.67012
1.06_169.9859m/z			0.000776844	1.84138
1.06_192.0244m/z			0.00403737	1.61368
1.07_412.9999n			0.000345701	1.57742
1.06_149.9997m/z			0.00209503	1.66409
1.06_332.5402m/z			0.0185513	-1.54498
1.06_309.9672n			0.000132889	1.96987
1.05_343.8539m/z			0.0150583	1.84668
1.06_236.9033n			0.00826464	1.62097
1.05_229.9804m/z			0.00773022	1.51757
1.05_198.8546m/z			0.0332304	1.57206
1.05_380.8650n			0.0281474	1.66765
1.05_301.9699m/z			0.00981831	1.86232
1.06_277.8638m/z			0.0331953	1.57455
1.06_281.9310m/z			0.0471223	1.58759
1.05_98.9189m/z			0.017615	1.94973
1.01_778.6419m/z			0.0113623	-1.69903
1.01_394.8744m/z			0.031319	1.52609
1.01_626.6929m/z			0.00130666	-1.79867
1.02_158.9642m/z			0.0113523	1.62268
1.02_710.6542m/z			0.00807163	-1.99732
1.02_546.7276m/z			0.00381091	-1.75303
1.02_628.6911m/z			0.00370037	-1.89658
1.01_310.9129m/z			0.0128096	1.74532
1.01_864.6012m/z			0.00398809	-2.06033
1.01_546.8231m/z			0.029008	1.64387
0.99_638.8090m/z			0.000672577	1.50762
0.99_592.8161m/z			0.0080719	1.57861
1.52_247.0694n			1.34e-06	-2.00604
1.59_125.0904m/z			0.000991778	5.25424
1.11_332.5618m/z			2.56e-06	-3.39108
1.10_531.1366m/z			0.0114669	1.60201
1.08_539.0219m/z			0.000211151	1.62642
1.07_394.0429m/z			0.00466496	-1.54041
1.07_354.2349m/z			0.00905939	-1.56572
1.08_492.1541m/z			0.01266	-1.87983
1.15_384.0780n			9.17e-06	1.96878
1.17_302.1799m/z			6.79e-06	1.71941
1.16_368.5833n			0.0168951	1.55255
1.16_137.5210m/z			5.53e-06	1.7695
1.16_135.0481m/z			1.11e-06	2.12374
1.16_501.0866m/z			0.000115411	2.2636
1.16_581.0528m/z			6.84e-05	1.85581
