# Supplementary material for: MYC regulates ribosome biogenesis and mitochondrial gene expression programs through its interaction with host cell factor–1
Source: eLife. 2021 Jan 8;10:e60191. doi: 10.7554/eLife.60191 (PMC7793627; doi:10.7554/eLife.60191)
Supplement: Figure 2—source data 2. [file elife-60191-fig2-data2.xlsx]

## Sheet: WT vs. 4A
Compound	Compound ID	Description	Anova (p)_WTvs4A	Max Fold Change_WTvs4A
7.70_106.0863m/z	HMDB0004437	Diethanolamine	0.00211556	-2.28607
6.79_131.1180m/z	HMDB0002064	N-Acetylputrescine	5.39e-06	-2.06068
5.25_204.0900n	HMDB0000929	L-Tryptophan	2.74e-05	1.64023
6.91_218.1388m/z	HMDB0000824	Propionylcarnitine	4.47e-07	-2.30619
5.85_150.0584m/z	HMDB0000696	L-Methionine	6.81e-06	1.61011
8.04_204.1231m/z	HMDB0000201	L-Acetylcarnitine	4.81e-06	-1.73085
9.96_106.0499m/z	HMDB0000187	L-Serine	9.11e-06	1.58995
6.91_182.0813m/z	HMDB0000158	L-Tyrosine	2e-05	1.59287
10.14_162.1125m/z	HMDB0000062	L-Carnitine	1.26e-05	-1.54999
10.65_664.1164m/z	NAD-41	NAD	4.32e-05	-4.24084
6.91_165.0547m/z	HMDB0124923	3-hydroxy-3-(4-hydroxyphenyl)propanoic acid	0.000408477	1.57265
8.23_248.1494m/z	HMDB0062735	(R)-3-hydroxybutyrylcarnitine	2.71e-06	-1.72775
6.35_230.1864m/z	HMDB0041947	N1,N8-Diacetylspermidine	1.08e-06	1.928
5.85_133.0318m/z	HMDB0037115	(Â±)-2-Hydroxy-4-(methylthio)butanoic acid	8.91e-06	1.61927
4.58_507.3690n	HMDB0013122	LysoPC(P-18:0)	6.48e-07	-1.91627
2.89_438.2978m/z	HMDB0011152	PE(P-16:0e/0:0)	1.83e-07	-1.61161
4.56_509.3848n	HMDB0011149	LysoPC(O-18:0)	1.93e-07	-2.06344
4.51_493.3169n	HMDB0010383	LysoPC(16:1(9Z)/0:0)	3.51e-05	-1.55182
4.75_196.0581m/z	HMDB0006488	N-Acetyl-L-glutamate 5-semialdehyde	1.94e-06	-2.00532
6.91_136.0758m/z	HMDB0004825	p-Octopamine	4.53e-05	1.58203
6.06_71.0605m/z	HMDB0004101	Beta-Aminopropionitrile	0.0390533	2.9283
9.49_176.0667m/z	HMDB0003157	Guanidinosuccinic acid	1.69e-09	-2.71512
6.04_232.1544m/z	HMDB0002013	Butyrylcarnitine	3.78e-06	-1.70701
10.63_560.0790m/z	HMDB0001178	Adenosine diphosphate ribose	0.00059243	1.85784
5.47_246.1701m/z	HMDB0000688	Isovalerylcarnitine	8.34e-06	1.57432
10.87_170.0925m/z	HMDB0000479	3-Methylhistidine	1.03e-05	2.32324
10.89_156.0769m/z	HMDB0000177	L-Histidine	1.13e-05	1.63863
8.73_119.0583n	HMDB0000167	L-Threonine	1.36e-05	1.54398
8.69_90.0550m/z	HMDB0000161	L-Alanine	1.46e-05	1.62065
10.45_104.0706m/z	HMDB0000112	gamma-Aminobutyric acid	4.44e-05	-1.56788
10.08_348.0703m/z	HMDB0000045	Adenosine monophosphate	0.00442153	2.26864
11.72_170.0925m/z	HMDB0000001	1-Methylhistidine	1.47e-05	1.51931
4.66_481.3532n	14713947	PC(O-16:0/0:0)	6.95e-08	-2.4879
1.36_198.1853m/z	7982826	12-amino-dodecanoic acid	0.0119289	-3.34753
1.35_385.3194n	HMDB0062517	Pentadecanoylcarnitine	0.0184971	-9.36031
1.34_385.3192n	HMDB0062517	Pentadecanoylcarnitine	0.00926447	-3.74699
8.56_518.0926m/z	HMDB0059635	Lipoyl-AMP	0.000110099	-1.92026
2.16_899.6066m/z	HMDB0041511	Glycerol 2-(9Z,12Z-octadecadienoate) 1-hexadecanoate 3-O-[alpha-D-galactopyranosyl-(1->6)-beta-D-galactopyranoside]	1.34e-07	-3.60992
4.56_749.4687m/z	HMDB0040824	Tsangane L 3-glucoside	0.0262692	-1.60464
6.86_187.1078m/z	HMDB0039948	3,4-Dihydroxy-2-hydroxymethyl-1-pyrrolidinepropanamide	0.00251211	-2.5855
6.04_233.1577m/z	HMDB0037766	3-Mercaptohexyl hexanoate	4.35e-06	-1.72288
6.90_183.0846m/z	HMDB0037764	S-[1-[2-(Acetyloxy)ethyl]butyl] ethanethioate	2.07e-05	1.62981
1.73_535.4965n	HMDB0035480	N-[(4E,8E)-1,3-dihydroxyoctadeca-4,8-dien-2-yl]hexadecanamide	1.22e-06	-1.66816
1.50_378.3155m/z	HMDB0035282	Solasodine	4.53e-05	-2.45816
5.25_206.1006m/z	HMDB0032421	2-(4-Methyl-5-thiazolyl)ethyl hexanoate	1.4e-05	1.5226
10.14_163.1158m/z	HMDB0032380	(S1)-Methoxy-3-heptanethiol	8.58e-06	-1.63857
1.87_285.1309m/z	HMDB0031897	Phaseolic acid	0.016074	-1.90881
3.92_318.1341m/z	HMDB0030341	Piplartine	0.0118998	1.63573
1.38_471.3794m/z	HMDB0030014	(3beta,5alpha,6beta,24R)-Stigmastane-3,5,6-triol	0.0442942	-5.19482
5.12_225.0847m/z	HMDB0029047	Serylproline	5.33e-05	-1.73378
12.29_245.1134m/z	HMDB0029016	Prolyl-Glutamate	2.3e-05	1.78557
2.00_209.1285m/z	HMDB0028930	Leucyl-Hydroxyproline	0.00133049	2.25051
8.57_213.1234m/z	HMDB0028876	Hydroxyprolyl-Valine	1.28e-05	-1.79597
10.89_171.0765m/z	HMDB0028842	Glycyl-Hydroxyproline	0.000228776	1.68637
7.09_241.1547m/z	HMDB0015407	Pirbuterol	9.74e-06	-1.8739
10.88_502.0957m/z	HMDB0015059	Ceforanide	0.00183146	1.52784
4.56_512.3984m/z	HMDB0014866	Rocuronium	2.27e-06	-2.22353
8.15_397.1653m/z	HMDB0014697	Hydroxyzine	6.45e-11	15.8216
4.64_378.1933m/z	HMDB0014425	Disopyramide	0.0044543	1.82674
3.15_717.5670n	HMDB0013404	PC(o-16:0/16:1(9Z))	1.93e-08	-2.04132
3.20_692.5588m/z	HMDB0013341	PC(o-14:0/16:0)	2.68e-07	-1.74607
1.38_254.2115m/z	HMDB0013317	Tridecanoylglycine	0.00736813	-4.8501
3.29_492.2024m/z	HMDB0012634	20-COOH-leukotriene E4	0.0270277	-2.05274
4.44_812.6767n	HMDB0012107	SM(d18:1/24:1(15Z))	3.78e-05	1.53766
3.72_677.5592m/z	HMDB0012085	SM(d18:0/14:0)	1.73e-05	1.51446
4.23_774.6369m/z	HMDB0008291	PC(20:0/P-16:0)	5.65e-07	-1.86261
4.61_494.3603m/z	HMDB0006460	Arachidyl carnitine	3.7e-06	-1.9271
6.92_141.0659m/z	HMDB0004988	Pi-Methylimidazoleacetic acid	0.00137387	3.15017
5.85_151.0618m/z	HMDB0003162	7-Methylhypoxanthine	6.98e-06	1.62885
2.33_125.1074m/z	HMDB0002038	N(6)-Methyllysine	0.00115621	2.97092
8.72_406.1320m/z	HMDB0001542	N-Acetyllactosamine	1.03e-06	1.95617
5.85_194.0224m/z	HMDB0001128	5-Phosphoribosylamine	2.27e-06	1.56848
5.35_203.1027m/z	HMDB0001104	N-Acetyl-b-glucosaminylamine	0.0021715	2.25857
11.00_173.0210m/z	HMDB0000126	Glycerol 3-phosphate	7.93e-07	-8.20056
1.93_271.1152m/z	HMDB0000034	Adenine	0.0117191	-1.90429
1.49_124.0870m/z	Creatine ethyl ester 30553	Creatine ethyl ester	0.000891498	2.27116
12.34_160.1333m/z	332975989	8-aminocaprylic acid	4.76e-06	-1.66656
3.35_706.5741m/z	123061433	PC(O-18:0/13:0)	6.51e-08	-2.13864
1.32_406.2928m/z	123060523	N-oleoyl threonine	0.0029052	-3.52524
6.45_330.2391m/z	74382692	R-Dysidazirine	0.00140172	1.95034
2.09_314.3417m/z	74382680	2-amino-14,16-dimethyloctadecan-3-ol	0.000107396	-2.67162
12.23_473.1198m/z	74380961	6'-Hydroxy-2,3,4,5,2',3',4'-heptamethoxychalcone	8.7e-06	2.39237
4.54_482.3243m/z	7983912	PC(15:0/0:0)	3.12e-05	-1.6285
1.66_380.3311m/z	7850568	N-(2-fluro-ethyl)-eicosanoyl amine	0.0151665	-1.54796
6.83_156.0849m/z	1037593-69-3	Homocysteine, butyl ester	0.00783744	2.09708
3.57_772.6211m/z	799268-63-6	1-(1Z-Octadecenyl)-2-(9Z-octadecenoyl)-sn-glycero-3-phosphocholine	2.02e-07	-1.60134
4.62_496.3756m/z	78858-44-3	2-O-Methyl PAF C-16	9.81e-08	-2.4897
1.91_356.2617m/z	63155-80-6	N-Stearoyltaurine	0.00140435	-2.4044
1.34_345.2036m/z	57593-11-0	Tetrapropylene glycol monobutyl ether	0.0429991	1.85878
2.68_721.5066m/z	40681-82-1	Orn-Orn-Orn	0.00116795	-1.81021
16.98_367.1394m/z	645-84-1	Phosphocholine	0.0158777	2.31604
3.91_140.0369m/z	3-Aminopropanesulphonic Acid 17381	3-Aminopropanesulphonic Acid	0.00381079	1.58917
1.91_411.2870m/z	LMFA01050548	9,10-Dihydroxydocosanoic acid	4.77e-06	-2.92713
1.32_431.3844m/z	LMFA01031112	18Z-heptacosenoic acid	0.0118124	-4.79993
3.94_567.1271m/z	HMDB0134909	3,4,5-trihydroxy-6-{[14-hydroxy-3-methoxy-4-(3-methylbut-2-en-1-yl)-8,17-dioxatetracyclo[8.7.0.0Â²,â·.0Â¹Â¹,Â¹â¶]heptadeca-1(10),2(7),3,5,11(16),12,14-heptaen-5-yl]oxy}oxane-2-carboxylic acid	0.00321055	2.11523
4.54_477.1757m/z	HMDB0134197	3,4,5-trihydroxy-6-[(16-hydroxy-3-methyl-1,7-dioxo-3,4,5,6,7,8,9,10-octahydro-1H-2-benzoxacyclotetradecin-14-yl)oxy]oxane-2-carboxylic acid	0.0220625	1.59216
16.98_389.1212m/z	HMDB0132950	3,4,5-trihydroxy-6-[4-(4-methyl-3-oxopent-1-en-1-yl)phenoxy]oxane-2-carboxylic acid	0.011797	1.50294
1.80_655.5078m/z	HMDB0115834	PA(i-20:0/15:0)	5.45e-07	1.82094
4.52_645.4299m/z	HMDB0115200	PA(20:5(5Z,8Z,11Z,14Z,17Z)/15:0)	0.00136514	3.09907
1.97_692.4649m/z	HMDB0113903	PE-NMe2(14:1(9Z)/18:4(6Z,9Z,12Z,15Z))	2.49e-05	1.70422
1.51_842.5903m/z	HMDB0112526	PS(20:0/20:3(5Z,8Z,11Z))	0.000342057	1.55743
3.55_824.5835m/z	HMDB0112477	PS(18:3(9Z,12Z,15Z)/22:0)	0.000182251	-2.33327
5.25_223.0845n	HMDB0094724	3-hydroxyphenylpropionylglycine	8.8e-06	1.60369
2.55_104.0706m/z	HMDB0094692	N-Methylalanine	0.00193987	2.60313
1.69_381.3514m/z	HMDB0094670	1,4-Bis-(1,1-dimethylethyl)-benzene	0.000996293	2.72931
1.91_439.3183m/z	HMDB0072880	MG(0:0/i-21:0/0:0)	1.6e-06	-2.65369
6.79_114.0914m/z	HMDB0062769	Epsilon-caprolactam	3.97e-06	-1.88948
1.36_149.1326m/z	HMDB0061809	1-Methyl-4-(1-methylpropyl)-benzene	0.0231924	-2.67617
1.36_147.1169m/z	HMDB0061808	(3-Methyl-2-butenyl)-benzene	0.0190948	-2.4284
3.90_599.3192m/z	HMDB0061693	1-Oleoylglycerophosphoinositol	2.92e-06	-1.56203
7.44_190.0645m/z	HMDB0060675	Carbamazepine iminoquinone	0.00912219	1.82607
2.52_127.0866m/z	HMDB0060385	4-Amino-1-piperidinecarboxylic acid	0.0349881	1.80683
1.37_192.1515n	HMDB0059883	alpha-Ionone	0.0204952	-2.86526
1.90_605.5505m/z	HMDB0055965	DG(14:0/0:0/22:1n9)	3.3e-05	-1.65305
6.45_178.0863m/z	HMDB0041943	N-Acetyldopamine	0.000248881	-1.51932
9.53_224.9864m/z	HMDB0041706	Caffeic acid 3-sulfate	0.000375195	1.76268
1.36_226.1570n	HMDB0040615	4,5-Dihydrovomifoliol	0.0147083	-2.88382
1.36_173.1326m/z	HMDB0040284	1,2-Dihydro-1,1,6-trimethylnaphthalene	0.00885393	-5.30536
1.91_409.2714m/z	HMDB0040270	Diethylhexyl adipate	0.000939844	-1.7709
1.38_128.1070m/z	HMDB0040030	1-(1-Pyrrolidinyl)-2-propanone	0.0350203	-2.73665
5.47_247.1734m/z	HMDB0038947	(S)-3-Methylthiohexyl hexanoate	4.92e-06	1.58111
6.91_219.1421m/z	HMDB0038945	(S)-3-Mercaptohexyl pentanoate	3.61e-07	-2.39851
1.93_457.1540m/z	HMDB0038862	D-Galactopyranosyl-(1->3)-D-galactopyranosyl-(1->3)-L-arabinose	0.000189804	2.42692
2.13_737.5537m/z	HMDB0036013	(R)-3,4-Dihydro-2-(4,8,12-trimethyl-3,7,11-tridecatrienyl)-2H-1-benzopyran-6-ol	4.35e-07	-2.00713
8.68_247.0578m/z	HMDB0033942	Dambonitol	1.38e-05	-1.57184
6.83_95.0604m/z	HMDB0033112	Methylpyrazine	0.00724441	1.98915
3.93_331.1293m/z	HMDB0033108	Semilepidinoside B	0.00489197	1.52832
1.36_180.1514n	HMDB0032531	2-trans-6-cis-Dodecadienal	0.0192923	-3.24016
8.05_205.1265m/z	HMDB0032327	Hexyl 3-mercaptobutanoate	4.44e-06	-1.74985
6.51_72.0809m/z	HMDB0031641	Pyrrolidine	0.000690673	1.58697
1.91_209.0785m/z	HMDB0030988	5-(2-Methylpropyl)tetrahydro-2-oxo-3-furancarboxylic acid	0.0271729	-1.60579
1.35_211.1693m/z	HMDB0030425	Linalyl propionate	0.0137492	-2.12367
5.20_231.0840m/z	HMDB0029968	Ethyl beta-D-glucopyranoside	0.034819	-1.86194
4.39_217.0684m/z	HMDB0029965	Methyl beta-D-glucopyranoside	1.3e-05	-1.64574
4.56_103.0542m/z	HMDB0029638	4-Methylbenzaldehyde	0.000293564	1.58356
4.30_257.0745m/z	HMDB0029057	Threoninyl-Aspartate	9.04e-06	-1.66122
2.35_247.1112m/z	HMDB0028981	Methionyl-Proline	0.0104511	2.34154
1.52_335.1060m/z	HMDB0015186	Penicillin G	0.00120668	1.99255
2.58_200.1758m/z	HMDB0014849	Diethylcarbamazine	0.00279183	2.15773
4.18_187.0537m/z	HMDB0014533	Carbimazole	0.00169691	2.06765
2.17_331.2049m/z	HMDB0014452	Bexarotene	0.000443667	-6.13721
2.24_298.2741m/z	HMDB0013648	Palmitoleoyl Ethanolamide	0.000116567	-1.89998
2.19_139.1230m/z	HMDB0012497	1-Pyrroline	0.00134311	2.80716
1.43_788.5435m/z	HMDB0012380	PS(18:0/18:2(9Z,12Z))	0.000223771	-1.65128
1.44_764.5437m/z	HMDB0012376	PS(18:0/16:0)	0.000827841	-1.79888
2.68_734.4966m/z	HMDB0012375	PS(18:0/14:1(9Z))	2.8e-05	-3.02502
1.95_140.0819m/z	HMDB0012234	Histidinal	0.00041591	2.31333
4.33_200.1394m/z	HMDB0012230	Gamma-glutamyl-L-putrescine	0.0182491	3.43044
2.12_564.5351m/z	HMDB0011774	Cer(d18:1/18:1(11Z))	1.1e-06	-1.89722
3.25_192.0690m/z	HMDB0011745	N-Acetyl-L-methionine	4.78e-05	-2.51807
3.01_526.2928m/z	HMDB0011526	LysoPE(22:6(4Z,7Z,10Z,13Z,16Z,19Z)/0:0)	0.000183716	-1.92533
2.80_528.3085m/z	HMDB0011524	LysoPE(22:5(4Z,7Z,10Z,13Z,16Z)/0:0)	0.000963035	-1.5387
4.33_538.3870m/z	HMDB0011520	LysoPE(22:0/0:0)	0.000286865	-1.50792
2.88_480.3084m/z	HMDB0011506	LysoPE(18:1(9Z)/0:0)	3.25e-05	-1.7266
2.98_454.2927m/z	HMDB0011503	LysoPE(16:0/0:0)	0.00134364	-1.85036
3.24_454.2927m/z	HMDB0011503	LysoPE(16:0/0:0)	7.99e-05	-1.60483
2.79_526.2928m/z	HMDB0011496	LysoPE(0:0/22:6(4Z,7Z,10Z,13Z,16Z,19Z))	0.0001426	-1.54877
3.01_528.3084m/z	HMDB0011494	LysoPE(0:0/22:5(4Z,7Z,10Z,13Z,16Z))	0.00156156	-2.02144
2.76_530.3241m/z	HMDB0011493	LysoPE(0:0/22:4(7Z,10Z,13Z,16Z))	7.85e-05	-2.37135
3.03_502.2927m/z	HMDB0011487	LysoPE(0:0/20:4(5Z,8Z,11Z,14Z))	0.000864168	-1.64323
1.44_454.2928m/z	HMDB0011473	LysoPE(0:0/16:0)	0.0476774	1.70557
2.52_674.5118m/z	HMDB0011339	PE(P-16:0/16:1(9Z))	8.85e-07	-1.59947
3.32_732.5902m/z	HMDB0011238	PC(P-18:0/15:0)	9.91e-08	-1.7782
4.30_482.3243m/z	HMDB0011130	LysoPE(18:0/0:0)	2.8e-05	-1.59688
2.88_482.3241m/z	HMDB0011129	LysoPE(0:0/18:0)	6.98e-05	-1.95455
4.62_506.3606m/z	HMDB0010408	LysoPC(P-18:1(9Z))	1.5e-06	-2.24686
2.83_464.3136m/z	HMDB0010381	LysoPC(15:0)	1.48e-06	-1.54919
16.98_263.0539m/z	HMDB0010324	Benzoyl glucuronide (Benzoic acid)	0.0178288	1.87796
3.46_784.6205m/z	HMDB0009546	PE(22:1(13Z)/P-18:1(9Z))	5.39e-08	-2.15555
3.43_758.6048m/z	HMDB0009248	PE(20:0/P-18:1(11Z))	9.48e-07	-1.53928
2.02_668.4649m/z	HMDB0009086	PE(18:2(9Z,12Z)/14:1(9Z))	8.38e-06	1.9932
2.60_676.5271m/z	HMDB0008851	PE(14:0/P-18:0)	3.47e-06	-2.4915
2.09_776.5228m/z	HMDB0008723	PC(22:6(4Z,7Z,10Z,13Z,16Z,19Z)/14:1(9Z))	1.42e-05	1.75181
4.21_892.6792m/z	HMDB0008519	PC(20:5(5Z,8Z,11Z,14Z,17Z)/24:0)	1.12e-05	1.57065
2.98_742.5744m/z	HMDB0008030	PC(16:1(9Z)/P-18:1(9Z))	4.8e-07	-1.51469
3.71_740.5567m/z	HMDB0007994	PC(16:0/P-16:0)	1.56e-05	-2.00274
2.04_586.5171m/z	HMDB0004948	Ceramide (d18:1/9Z-18:1)	1.58e-05	-2.14517
1.45_125.0710m/z	HMDB0004181	Methylimidazole acetaldehyde	1.18e-06	4.43197
1.37_81.0699m/z	HMDB0003315	Cyclohexanone	0.0300984	-2.72803
2.24_299.2825n	HMDB0002100	Palmitoylethanolamide	0.000193773	-1.63316
5.22_74.0601m/z	HMDB0001888	N,N-Dimethylformamide	0.00223122	2.72407
1.37_91.0543m/z	HMDB0001858	p-Cresol	0.0354656	-1.86711
6.32_233.1133m/z	HMDB0001199	N2-Succinyl-L-ornithine	0.0145276	2.26634
1.35_118.0651m/z	HMDB0000738	Indole	0.0288261	-2.28232
10.87_185.0323m/z	HMDB0000641	L-Glutamine	8.68e-05	2.87765
3.21_97.0761m/z	HMDB0000323	3-Amino-2-piperidone	0.00995326	1.80009
4.61_244.0793m/z	HMDB0000215	N-Acetyl-D-glucosamine	0.00237252	1.78421
9.54_222.9883m/z	Aklomide 17654	Aklomide	0.000350591	1.7503
1.75_723.5022m/z	160780261	PE-Cer(d14:2(4E,6E)/22:1(13Z)(2OH))	6.94e-05	2.17308
2.47_592.5664m/z	160780093	Cer(d14:1/24:1)	9.63e-08	-2.10164
1.40_363.3045m/z	123068875	7-oxo-cholestenone	0.0263759	-1.99014
2.09_711.5381m/z	123068748	SM(d16:1/17:0)	4.12e-05	-1.57805
1.91_433.2692m/z	123067340	PA(19:1(9Z)/0:0)	2.79e-05	-2.27136
2.16_871.5696m/z	123066067	PI(O-18:0/20:5(5Z,8Z,11Z,14Z,17Z))	3.32e-05	-1.94153
1.87_871.5806m/z	123064782	PG(18:1(9Z)/22:0)	0.000504942	2.05942
2.45_482.2877m/z	123063866	PS(P-16:0/0:0)	4.26e-06	2.13798
3.81_760.6208m/z	123061503	PC(P-16:0/19:0)	3.71e-09	-2.71892
3.74_734.6059m/z	123061436	PC(O-18:0/15:0)	3.69e-08	-2.67826
3.10_678.5425m/z	123061416	PC(O-16:0/13:0)	4.05e-06	-1.69554
1.34_380.2771m/z	123060522	N-palmitoyl threonine	0.0211155	-2.77808
1.35_266.2116m/z	74382699	Micropine	0.00675679	-4.69021
3.39_440.3136m/z	74380437	PE(O-16:0/0:0)	7.68e-07	-3.58824
4.71_468.3449m/z	14713946	PC(O-15:0/0:0)	4.99e-08	-2.62635
1.91_437.3027m/z	14710838	Tetracosanedioic acid	0.000146931	-2.12186
3.71_742.5727m/z	7983792	PC(O-16:0/16:0)	0.000154306	-1.60992
3.58_646.6133m/z	288095-34-1	N-(.alpha.-Hydroxytetracosenoyl)-4-sphingenine	3.62e-06	-1.56687
1.38_170.1540m/z	121475-76-1	Norleucine, butyl ester	0.0243521	-2.63069
3.90_141.0339m/z	13252-83-0	4-Hydroxy-6-methylcoumarin	0.00144226	1.59357
8.56_252.0400m/z	2243-76-7	Mordant Orange 1	0.000103357	-1.92833
10.89_110.0713m/z	2-Aminomethylpyrimidine 21099	2-Aminomethylpyrimidine	0.00022404	3.65659
10.11_170.1617n	L-CARNITINE - D9		0.00109739	1.57671
10.15_341.3305m/z	L-CARNITINE - D9		0.00136411	5.76721
10.94_153.1584m/z	L-CARNITINE - D9		0.00103066	1.56345
3.91_272.0689n	Inosine - 4N15		0.00117449	1.68588
1.72_395.3672m/z	HMDB0062381	4,4-dimethyl-5alpha-cholesta-8,14-dien-3beta-ol	7.79e-05	2.8339
3.55_720.5899m/z	123061434	PC(O-18:0/14:0)	5.43e-06	-1.5789
3.55_746.6055m/z	95403-34-2	1-Hexadecyl-2-(9Z-octadecenoyl)-sn-glycero-3-phosphocholine	8.15e-07	-1.50967
3.47_992.7063m/z	123068814	FMC-6(d18:1/22:0(2-OH))	0.000276507	-3.20726
3.28_777.2552m/z	HMDB0060943	Sulfinpyrazone sulfide	0.0357719	-1.55225
3.74_811.0992m/z	HMDB0039186	2,3,4,6-Tetragalloyl-D-glucopyranose	0.00784356	1.5071
10.09_161.1053n	CARNITINE-1		0.0032557	-1.81228
9.94_133.0608m/z	70-47-3	L-Asparagine	7.38e-06	1.50093
4.63_723.4532m/z	24702032	Octaprenyl diphosphate, trans-Octaprenyl diphosphate	0.038889	-1.89284
2.65_786.5270m/z	123062801	PS(14:1(9Z)/22:2(13Z,16Z))	0.00248237	-1.6123
1.40_647.6450m/z	HMDB0034373	N-(14-Methylhexadecanoyl)pyrrolidine	0.0443741	-11.3049
1.47_244.1909m/z	HMDB0013286	N-Undecanoylglycine	0.049247	-2.63769
1.65_367.3359m/z	128-33-6	Zymosterol	0.0299375	1.51431
4.24_498.3460m/z			4.16e-05	-1.5103
4.48_498.3459m/z			2.98e-05	-1.5164
4.48_574.3171m/z			0.00145279	-2.18806
4.36_190.0413n			0.0480442	1.83507
3.65_176.0377m/z			0.00118639	1.72255
3.63_608.3923m/z			0.000148533	-2.75843
3.63_1014.6883m/z			0.00117057	-2.07932
3.27_977.6447n			0.00124099	-1.53922
3.57_723.5996m/z			1.63e-05	-1.64673
3.57_749.6152m/z			2.92e-08	-1.62849
3.26_963.6669n			1e-06	-3.23977
3.21_98.0794m/z			0.0105796	1.87352
3.21_695.5682m/z			2.37e-05	-2.57115
3.39_1014.6878m/z			0.000705992	-2.48924
3.89_272.0792m/z			0.00328512	1.61188
3.92_566.1301m/z			0.0143036	2.68833
9.18_165.9668m/z			0.000381421	1.62126
9.54_223.9916m/z			0.000191751	1.81775
9.53_306.9496m/z			0.000693762	1.70701
9.51_390.9108m/z			0.00118974	1.75283
8.56_585.5553m/z			4.08e-05	-2.05425
8.55_772.0699n			4.59e-05	-1.68007
8.57_375.0439n			1.92e-05	-1.56238
8.44_176.0295m/z			4.03e-05	1.5369
8.57_500.0586n			5.09e-05	-1.54169
8.57_126.0118n			7.06e-05	-1.7521
8.57_625.0733n			2.43e-05	-1.88314
8.69_91.0583m/z			1.17e-05	1.67836
9.56_290.9756m/z			0.000471164	1.66948
12.01_250.1399m/z			0.0399142	3.00341
10.94_154.1618m/z			0.000977974	1.56392
10.92_152.1522m/z			0.00149197	1.56706
16.98_261.0435n			0.0162381	1.76084
16.98_456.9905n			0.0159987	1.60465
16.98_339.0207n			0.015791	1.85305
17.65_242.6421m/z			4.02e-07	-3.05595
16.98_535.9752m/z			0.0170759	1.65441
16.98_418.0052m/z			0.0174737	2.08297
16.98_427.1062m/z			0.0134538	3.07841
10.88_157.0802m/z			0.000287263	3.84731
9.73_207.0144m/z			0.0011274	1.65155
9.71_151.9511m/z			0.0128972	1.75241
9.91_127.0246n			0.000110201	1.76383
9.88_154.0355n			0.000258548	1.73403
4.88_173.1287m/z			0.00170051	1.54144
4.66_560.3379m/z			2.66e-08	-3.16555
4.66_484.3669m/z			6.81e-08	-2.59602
4.64_204.0570n			0.00958178	1.68451
6.84_154.0743n			0.00808089	2.07737
6.82_164.1282m/z			0.00975905	-2.5935
6.80_132.1213m/z			8.85e-06	-2.14071
7.69_107.0896m/z			0.00208903	-2.35544
6.35_231.1897m/z			2.53e-06	1.96542
6.05_89.0903m/z			0.0231713	1.79508
5.86_152.0542m/z			6.62e-06	1.63748
6.06_88.0869m/z			0.039282	2.85095
6.51_125.1303m/z			0.00255809	1.50192
1.39_723.6609m/z			0.010259	-16.5228
1.37_285.2176m/z			0.0114443	-4.05505
1.37_192.1508m/z			0.0107415	-9.12509
1.37_227.1880m/z			0.00457607	-22.2532
1.38_256.2272m/z			0.00596832	-4.01021
1.46_126.0743m/z			0.00127829	2.2255
1.40_673.6607m/z			0.0427909	-11.7872
1.33_430.3639m/z			0.0209922	-4.75485
1.34_410.3147m/z			0.0041562	-4.48592
1.32_793.6275m/z			0.0230217	-34.8825
1.35_198.1858n			0.00673387	-3.57004
1.36_230.2025m/z			0.0130294	-6.77031
1.36_209.1775m/z			0.00758934	-5.67631
1.36_227.1887n			0.0120409	-3.44374
1.35_444.3796m/z			0.0245347	-4.06678
1.35_225.1730n			0.0121032	-4.35358
2.10_322.3217m/z			0.046151	2.73796
2.07_340.3938m/z			0.00441417	-2.8875
2.14_706.5828m/z			1.26e-05	-1.50925
1.96_265.2639m/z			0.0137336	2.08912
1.96_357.2357m/z			0.0447626	-2.18834
1.96_293.2952m/z			0.0136337	1.92493
2.00_401.2621m/z			0.0469045	-2.65344
2.06_284.3312m/z			0.00073285	-2.47884
2.04_312.3625m/z			0.00956403	-3.08442
2.17_430.3891m/z			0.00877196	-2.54672
2.40_529.3572m/z			5.41e-05	2.2368
2.45_399.3581m/z			0.00548747	-1.98797
2.63_760.6293m/z			2.64e-08	-2.11714
2.54_371.3267m/z			0.00873636	-1.81781
2.21_894.6509m/z			1.68e-08	-3.38458
2.20_140.1263m/z			0.00154537	2.88982
2.19_402.3578m/z			0.00940479	-2.57433
2.18_368.4250m/z			0.00692819	-2.44708
2.25_749.6016n			2.73e-08	-1.67989
1.62_764.5878m/z			1.99e-05	1.7433
1.63_747.5614m/z			1.04e-05	1.69645
1.72_692.5307m/z			1.47e-06	1.50692
1.64_574.5042m/z			2e-05	1.56875
1.91_931.5961m/z			0.00131317	1.60117
1.91_358.2774m/z			0.000379964	-2.94402
1.91_329.2387n			0.0486227	-1.55812
1.92_632.1957m/z			0.00116628	5.01123
1.92_344.2618m/z			0.00133237	-2.26479

## Sheet: WT vs. VP16 HBM
Compound	Compound ID	Description	Anova (p)_WTvsVP	Max Fold Change_WTvsVP
7.70_106.0863m/z	HMDB0004437	Diethanolamine	0.0235854	-1.60424
10.65_664.1164m/z	NAD-41	NAD	0.000120514	-2.64804
1.77_215.1522n	HMDB0013279	N-Nonanoylglycine	0.0299899	3.23993
1.49_229.1679n	HMDB0013267	N-Decanoylglycine	0.0293038	2.51079
4.56_509.3848n	HMDB0011149	LysoPC(O-18:0)	1.05e-06	-1.54256
3.54_426.3577m/z	HMDB0005065	Oleoylcarnitine	0.000731601	1.60235
9.49_176.0667m/z	HMDB0003157	Guanidinosuccinic acid	4.89e-10	1.87098
10.63_560.0790m/z	HMDB0001178	Adenosine diphosphate ribose	0.00190306	1.58518
11.44_176.0434n	HMDB0000828	Ureidosuccinic acid	9.99e-08	2.30133
10.08_348.0703m/z	HMDB0000045	Adenosine monophosphate	0.0134525	1.88536
1.88_827.5908m/z	HMDB0062332	N-Docosahexaenoyl GABA	0.00101169	-1.59484
4.56_749.4687m/z	HMDB0040824	Tsangane L 3-glucoside	0.0201569	-1.56359
4.56_512.3984m/z	HMDB0014866	Rocuronium	4.71e-06	-1.5723
8.15_397.1653m/z	HMDB0014697	Hydroxyzine	5.05e-09	-3.42377
3.85_225.1598m/z	HMDB0014539	Carisoprodol	0.0384509	1.73584
4.64_378.1933m/z	HMDB0014425	Disopyramide	0.00524136	1.72006
3.29_492.2024m/z	HMDB0012634	20-COOH-leukotriene E4	0.0116801	-2.04337
11.44_134.0448m/z	HMDB0000191	L-Aspartic acid	8.18e-08	2.01272
6.45_330.2391m/z	74382692	R-Dysidazirine	0.00457607	1.55138
4.62_496.3756m/z	78858-44-3	2-O-Methyl PAF C-16	1.62e-06	-1.54605
1.35_305.2687m/z	6674-22-2	Pyrimido[1,2-a]azepine, 2,3,4,6,7,8,9,10-octahydro-	0.0264824	3.61833
1.91_411.2870m/z	LMFA01050548	9,10-Dihydroxydocosanoic acid	0.00167005	-1.55138
3.94_567.1271m/z	HMDB0134909	3,4,5-trihydroxy-6-{[14-hydroxy-3-methoxy-4-(3-methylbut-2-en-1-yl)-8,17-dioxatetracyclo[8.7.0.0Â²,â·.0Â¹Â¹,Â¹â¶]heptadeca-1(10),2(7),3,5,11(16),12,14-heptaen-5-yl]oxy}oxane-2-carboxylic acid	0.00606057	1.83333
3.91_528.1800m/z	HMDB0130358	2-amino-4-({1-[(carboxymethyl)-C-hydroxycarbonimidoyl]-2-{[2-hydroxy-3-(4-hydroxy-2-methoxyphenyl)-1-phenylpropyl]sulfanyl}ethyl}-C-hydroxycarbonimidoyl)butanoic acid	1.09e-07	-2.04266
4.52_645.4299m/z	HMDB0115200	PA(20:5(5Z,8Z,11Z,14Z,17Z)/15:0)	0.0229375	1.82621
1.91_439.3183m/z	HMDB0072880	MG(0:0/i-21:0/0:0)	9.86e-05	-1.84144
9.53_224.9864m/z	HMDB0041706	Caffeic acid 3-sulfate	0.0045924	-1.50391
2.24_298.2741m/z	HMDB0013648	Palmitoleoyl Ethanolamide	6.11e-05	-1.72079
2.93_806.6046m/z	HMDB0011422	PE(P-18:1(11Z)/22:1(13Z))	6.47e-06	-1.60029
4.62_506.3606m/z	HMDB0010408	LysoPC(P-18:1(9Z))	2.02e-05	-1.63494
3.46_784.6205m/z	HMDB0009546	PE(22:1(13Z)/P-18:1(9Z))	1.16e-07	-1.58064
2.60_676.5271m/z	HMDB0008851	PE(14:0/P-18:0)	1.35e-06	-2.02072
1.45_125.0710m/z	HMDB0004181	Methylimidazole acetaldehyde	0.0145731	1.63525
1.75_723.5022m/z	160780261	PE-Cer(d14:2(4E,6E)/22:1(13Z)(2OH))	0.000250027	1.69638
2.88_748.5482m/z	123063753	PS(P-16:0/18:0)	2.34e-05	-1.82356
3.39_440.3136m/z	74380437	PE(O-16:0/0:0)	9.18e-06	-1.77489
1.91_437.3027m/z	14710838	Tetracosanedioic acid	0.00272181	-1.71425
10.15_341.3305m/z	L-CARNITINE - D9		0.00363662	2.7364
4.36_190.0413n			0.0387067	1.64088
3.63_608.3923m/z			0.00172788	-1.58161
3.26_963.6669n			0.000104377	-1.52843
3.21_695.5682m/z			3.29e-05	-1.52092
3.92_566.1301m/z			0.0149344	2.31358
9.54_223.9916m/z			0.00320979	-1.53939
9.51_390.9108m/z			0.00676814	-1.51945
8.52_247.1402m/z			3.93e-05	-1.64881
11.43_198.0254n			5.73e-07	1.65143
9.71_151.9511m/z			0.0280731	-1.5847
7.69_107.0896m/z			0.0219357	-1.63744
1.34_306.3003m/z			0.0197232	2.58981
1.34_289.2738m/z			0.0214623	2.68957
1.31_311.2557m/z			0.0463917	2.3838
1.36_364.3421m/z			0.0307284	1.68319
1.36_408.3683m/z			0.0178235	1.84975
1.35_333.2998m/z			0.0332761	10.9249
1.96_293.2952m/z			0.0294704	1.58152
1.91_358.2774m/z			0.0183502	-1.6037
1.89_803.5906m/z			0.00385499	-1.53942
