# Supplementary material for: MYC regulates ribosome biogenesis and mitochondrial gene expression programs through its interaction with host cell factor–1
Source: eLife. 2021 Jan 8;10:e60191. doi: 10.7554/eLife.60191 (PMC7793627; doi:10.7554/eLife.60191)
Supplement: Figure 3—source data 1. [file elife-60191-fig3-data1.xlsx]

## Sheet: Sheet1
Feature	Feature_gene_name	log2FoldChange	padj
ENSG00000099785.6	MARCH2	0.336719	0.00535484
ENSG00000173926.5	MARCH3	-0.363087	0.000508197
ENSG00000138758.7	SEPT11	-0.40581	7.48806e-25
ENSG00000128274.11	A4GALT	-0.540556	4.23016e-17
ENSG00000081760.12	AACS	0.206501	0.00502316
ENSG00000158122.7	AAED1	-0.349101	0.000654092
ENSG00000127837.5	AAMP	-0.212599	0.000621355
ENSG00000129673.5	AANAT	0.639374	0.020511
ENSG00000131043.7	AAR2	0.17786	0.0201839
ENSG00000090861.11	AARS	0.192808	1.05216e-06
ENSG00000124608.4	AARS2	0.146906	0.0477438
ENSG00000165029.11	ABCA1	-0.333473	4.93863e-16
ENSG00000107331.12	ABCA2	-1.75302	6.44585e-17
ENSG00000154262.8	ABCA6	-0.502266	8.59892e-13
ENSG00000064687.8	ABCA7	-0.329473	4.35285e-05
ENSG00000005471.11	ABCB4	3.86635	7.34506e-73
ENSG00000131269.11	ABCB7	0.136022	0.0478563
ENSG00000150967.13	ABCB9	0.386614	0.00284006
ENSG00000125257.9	ABCC4	-0.152291	0.00211763
ENSG00000173208.3	ABCD2	2.0082	4.20971e-06
ENSG00000119688.16	ABCD4	0.395947	3.48909e-06
ENSG00000164163.6	ABCE1	-0.245888	1.06641e-06
ENSG00000033050.3	ABCF2	-0.294625	1.29823e-22
ENSG00000161204.7	ABCF3	-0.183768	0.000185335
ENSG00000160179.14	ABCG1	-0.617846	3.3319e-21
ENSG00000114779.15	ABHD14B	-0.238372	0.0115778
ENSG00000129968.11	ABHD17A	0.168849	0.0237972
ENSG00000107362.9	ABHD17B	-0.710571	1.12699e-29
ENSG00000136379.7	ABHD17C	-3.64664	1.9161e-12
ENSG00000158201.5	ABHD3	0.207536	2.66191e-06
ENSG00000127220.5	ABHD8	0.508987	7.33671e-05
ENSG00000099204.14	ABLIM1	0.232899	6.7275e-15
ENSG00000146386.7	ABRACL	-0.644208	1.3457e-23
ENSG00000005189.15	AC004381.6	0.389353	0.00403264
ENSG00000226180.2	AC010536.1	-0.497063	0.0234216
ENSG00000228835.1	AC012123.1	-4.09373	0.00939965
ENSG00000225885.2	AC023590.1	-1.48913	1.68992e-15
ENSG00000269558.1	AC104057.1	-2.421	0.0132858
ENSG00000268367.1	AC126614.1	1.12778	0.028715
ENSG00000167315.13	ACAA2	-0.232659	7.862e-06
ENSG00000122971.4	ACADS	-2.99741	1.19307e-16
ENSG00000072778.15	ACADVL	0.272708	0.000445531
ENSG00000072818.7	ACAP1	-0.260765	0.00022203
ENSG00000114331.8	ACAP2	-0.224635	1.73189e-06
ENSG00000075239.9	ACAT1	-0.288594	0.000247714
ENSG00000120437.7	ACAT2	0.849342	5.0286e-58
ENSG00000107897.14	ACBD5	-0.264643	0.000248884
ENSG00000135847.5	ACBD6	-1.10407	1.55221e-92
ENSG00000159640.10	ACE	-1.14577	8.08222e-07
ENSG00000100813.10	ACIN1	-0.16118	0.000127633
ENSG00000129048.6	ACKR4	0.977173	7.94005e-67
ENSG00000131473.12	ACLY	0.446211	2.12312e-43
ENSG00000196636.7	ACN9	-0.288046	1.33208e-05
ENSG00000122729.14	ACO1	0.480088	6.3174e-07
ENSG00000100412.11	ACO2	-0.118036	0.0117495
ENSG00000142513.4	ACPT	0.404028	0.0172477
ENSG00000176715.11	ACSF3	0.174038	0.000242696
ENSG00000151726.9	ACSL1	0.299703	1.12827e-10
ENSG00000123983.9	ACSL3	0.13669	0.0212677
ENSG00000068366.15	ACSL4	0.133978	0.021514
ENSG00000005187.7	ACSM3	0.988138	0.0356217
ENSG00000154930.10	ACSS1	1.35645	5.13753e-47
ENSG00000131069.15	ACSS2	-0.323177	0.0242213
ENSG00000184009.5	ACTG1	-0.183596	3.12942e-09
ENSG00000115091.7	ACTR3	-0.272716	4.59524e-13
ENSG00000133627.13	ACTR3B	0.191433	0.0440118
ENSG00000106526.6	ACTR3C	-0.346643	0.0180153
ENSG00000115170.9	ACVR1	-3.80959	0.00572786
ENSG00000135503.8	ACVR1B	0.248962	0.0289996
ENSG00000114739.9	ACVR2B	0.279375	3.42386e-06
ENSG00000132744.3	ACY3	-0.430008	5.1937e-14
ENSG00000168803.10	ADAL	-0.290497	0.0059747
ENSG00000137845.10	ADAM10	-0.166509	0.00186245
ENSG00000143537.9	ADAM15	-0.431866	1.77217e-09
ENSG00000135074.11	ADAM19	-0.244502	4.99045e-08
ENSG00000114948.8	ADAM23	1.04166	5.51073e-52
ENSG00000151651.11	ADAM8	-0.889814	0.00110913
ENSG00000168615.7	ADAM9	0.137881	0.0232377
ENSG00000160323.14	ADAMTS13	0.884239	0.00267069
ENSG00000156218.8	ADAMTSL3	2.40178	5.67193e-07
ENSG00000197381.11	ADARB1	-0.625607	1.1605e-05
ENSG00000163050.12	ADCK3	0.14381	0.0277061
ENSG00000123815.7	ADCK4	0.248125	0.0034768
ENSG00000121281.8	ADCY7	0.242918	0.000384804
ENSG00000162104.5	ADCY9	1.3992	1.97447e-14
ENSG00000148700.9	ADD3	-0.143678	0.0167302
ENSG00000182551.9	ADI1	-0.840889	4.49034e-39
ENSG00000148926.5	ADM	-3.44815	3.53174e-44
ENSG00000128165.7	ADM2	1.15827	6.30765e-05
ENSG00000173020.6	ADRBK1	-0.268191	4.30212e-13
ENSG00000100077.10	ADRBK2	-0.13604	0.00559707
ENSG00000035687.9	ADSS	-0.227701	0.000248927
ENSG00000106624.4	AEBP1	-0.583903	0.001758
ENSG00000181026.13	AEN	-0.132127	0.00718647
ENSG00000172493.16	AFF1	0.843637	9.78947e-35
ENSG00000155966.9	AFF2	0.201731	2.59574e-05
ENSG00000072364.8	AFF4	-0.147507	0.0204949
ENSG00000183077.11	AFMID	-0.281413	0.000131949
ENSG00000038002.4	AGA	0.331428	0.00127826
ENSG00000204149.5	AGAP6	-0.21535	0.0260837
ENSG00000164252.8	AGGF1	0.16438	0.00281341
ENSG00000006530.11	AGK	-0.365467	0.00727324
ENSG00000162688.11	AGL	-0.157478	0.00928591
ENSG00000116771.5	AGMAT	-1.23717	0.000336182
ENSG00000126070.14	AGO3	0.105108	0.0327189
ENSG00000134698.10	AGO4	0.429277	4.28824e-07
ENSG00000204310.6	AGPAT1	0.405443	0.0186191
ENSG00000158669.7	AGPAT6	0.16714	8.2172e-05
ENSG00000018510.8	AGPS	-0.253929	1.85035e-06
ENSG00000188157.9	AGRN	-0.812897	0.0024116
ENSG00000153207.10	AHCTF1	-0.142903	5.8239e-05
ENSG00000158467.12	AHCYL2	-0.347906	0.000382138
ENSG00000126705.9	AHDC1	-0.603367	0.000867731
ENSG00000106546.8	AHR	-0.303641	0.000267985
ENSG00000111732.6	AICDA	-0.227943	1.04411e-06
ENSG00000204472.8	AIF1	-1.3083	0.0417047
ENSG00000042286.10	AIFM2	0.699725	2.7757e-05
ENSG00000112297.10	AIM1	0.226224	1.47838e-08
ENSG00000176092.9	AIM1L	-0.737704	0.0191488
ENSG00000023516.7	AKAP11	-0.201162	6.36606e-06
ENSG00000170776.15	AKAP13	0.170373	9.42603e-09
ENSG00000241978.5	AKAP2	0.40471	0.0384884
ENSG00000127914.12	AKAP9	0.29473	8.74166e-12
ENSG00000166452.7	AKIP1	-0.587732	0.000202684
ENSG00000174574.11	AKIRIN1	-0.143352	0.0133661
ENSG00000105221.12	AKT2	0.168196	0.00287461
ENSG00000148218.11	ALAD	0.412165	0.00019995
ENSG00000170017.8	ALCAM	-0.178318	0.00344946
ENSG00000059573.4	ALDH18A1	-0.311044	1.74165e-19
ENSG00000111275.8	ALDH2	0.790586	1.31301e-27
ENSG00000132746.10	ALDH3B2	-0.56851	0.00157782
ENSG00000143149.8	ALDH9A1	-0.145238	0.0474684
ENSG00000109107.9	ALDOC	0.635593	3.05302e-17
ENSG00000214160.5	ALG3	-0.258268	0.000367751
ENSG00000088035.11	ALG6	0.199227	0.0243192
ENSG00000091542.8	ALKBH5	-0.130576	0.0294832
ENSG00000137760.10	ALKBH8	-0.358014	2.21614e-07
ENSG00000116127.13	ALMS1	0.258099	2.57597e-05
ENSG00000012779.6	ALOX5	-0.469674	3.7418e-10
ENSG00000132965.5	ALOX5AP	-0.240969	0.0292505
ENSG00000136383.6	ALPK3	-1.45216	0.00504224
ENSG00000183684.6	ALYREF	-0.0972525	0.00666714
ENSG00000159461.10	AMFR	-0.13493	0.000994462
ENSG00000104899.4	AMH	1.22594	0.00133467
ENSG00000160593.13	AMICA1	1.37541	2.13732e-45
ENSG00000101935.5	AMMECR1	0.56463	1.41312e-39
ENSG00000166126.6	AMN	-0.261751	0.0445455
ENSG00000196704.7	AMZ2	-0.245255	7.64958e-06
ENSG00000153107.7	ANAPC1	-0.169563	4.86404e-08
ENSG00000141552.13	ANAPC11	0.196568	0.00186682
ENSG00000013523.5	ANGEL1	-0.219954	0.000835426
ENSG00000132623.11	ANKEF1	-0.625706	2.09893e-06
ENSG00000144504.11	ANKMY1	0.263902	0.0106449
ENSG00000088448.10	ANKRD10	-0.165923	0.000200983
ENSG00000101745.11	ANKRD12	-0.201448	0.00119622
ENSG00000076513.12	ANKRD13A	-0.152806	8.77275e-07
ENSG00000198720.8	ANKRD13B	-0.264897	0.00717011
ENSG00000105186.10	ANKRD27	-0.497452	2.0251e-30
ENSG00000206560.6	ANKRD28	-0.25729	1.26079e-08
ENSG00000164236.7	ANKRD33B	1.19689	2.10618e-24
ENSG00000163516.9	ANKZF1	-0.297675	1.47791e-08
ENSG00000011426.6	ANLN	0.121508	0.0296655
ENSG00000185101.8	ANO9	-0.460246	0.0038726
ENSG00000182718.12	ANXA2	2.01281	1.0584e-126
ENSG00000177721.3	ANXA2R	0.522706	0.000801829
ENSG00000173727.7	AP000769.1	0.361287	0.0012082
ENSG00000235878.4	AP001468.1	1.29121	1.04975e-12
ENSG00000228120.2	AP001631.10	0.966999	0.00613418
ENSG00000100280.12	AP1B1	0.155943	1.18212e-05
ENSG00000072958.4	AP1M1	0.213814	0.00914149
ENSG00000152056.12	AP1S3	1.51899	1.15598e-57
ENSG00000183020.9	AP2A2	0.255673	0.00317929
ENSG00000161203.9	AP2M1	-0.12083	0.00292695
ENSG00000081014.6	AP4E1	0.206997	0.000193198
ENSG00000221838.5	AP4M1	0.275894	0.0113591
ENSG00000100478.10	AP4S1	-0.391465	3.64013e-06
ENSG00000120868.9	APAF1	-0.244344	0.000450346
ENSG00000166313.14	APBB1	-0.71119	0.000635896
ENSG00000077420.11	APBB1IP	0.219655	0.00154473
ENSG00000163697.12	APBB2	0.260824	9.45801e-10
ENSG00000134982.12	APC	-0.134822	0.0161338
ENSG00000115266.7	APC2	0.529665	0.000647374
ENSG00000100823.7	APEX1	-0.128289	0.0242585
ENSG00000138613.9	APH1B	0.203211	0.00213056
ENSG00000166181.8	API5	-0.128709	0.0164432
ENSG00000101474.7	APMAP	0.224926	8.00559e-05
ENSG00000163382.7	APOA1BP	0.22195	0.00170089
ENSG00000179750.11	APOBEC3B	-1.50904	1.43687e-08
ENSG00000244509.3	APOBEC3C	-2.0188	4.17265e-84
ENSG00000243811.3	APOBEC3D	-1.79089	8.04404e-23
ENSG00000239713.3	APOBEC3G	-0.317433	0.00404658
ENSG00000100342.16	APOL1	2.44741	0.00153716
ENSG00000128335.9	APOL2	0.38898	2.65415e-06
ENSG00000128284.15	APOL3	1.4154	1.51786e-47
ENSG00000221963.5	APOL6	-0.209094	1.27874e-06
ENSG00000178878.8	APOLD1	0.611586	0.000247788
ENSG00000204444.6	APOM	0.577353	0.0237993
ENSG00000165272.10	AQP3	-0.816952	2.05974e-28
ENSG00000047365.7	ARAP2	-0.572511	2.06061e-18
ENSG00000143761.9	ARF1	0.138966	0.00373089
ENSG00000168374.6	ARF4	0.160691	0.022751
ENSG00000101199.8	ARFGAP1	-0.127541	0.0387771
ENSG00000149182.10	ARFGAP2	0.122536	0.0154021
ENSG00000242247.6	ARFGAP3	0.642169	1.54308e-10
ENSG00000066777.4	ARFGEF1	-0.168377	0.00029645
ENSG00000101246.15	ARFRP1	0.174327	0.0126445
ENSG00000081181.3	ARG2	-1.16759	2.18879e-08
ENSG00000146376.6	ARHGAP18	-2.03462	3.14294e-37
ENSG00000107863.12	ARHGAP21	-3.12636	0.0161754
ENSG00000225485.3	ARHGAP23	-1.77359	3.43348e-11
ENSG00000163219.7	ARHGAP25	0.319546	0.00169546
ENSG00000145819.11	ARHGAP26	-0.29109	0.00360912
ENSG00000159314.7	ARHGAP27	1.17579	3.86785e-36
ENSG00000186517.9	ARHGAP30	-0.214686	1.79863e-07
ENSG00000004777.14	ARHGAP33	0.497083	0.00108746
ENSG00000160007.13	ARHGAP35	0.242409	3.58751e-07
ENSG00000100852.8	ARHGAP5	-1.95059	4.23523e-125
ENSG00000123329.13	ARHGAP9	-0.498533	1.02311e-11
ENSG00000111348.4	ARHGDIB	-0.195358	2.24004e-06
ENSG00000116584.13	ARHGEF2	0.248234	2.86221e-08
ENSG00000163947.7	ARHGEF3	-0.766869	4.196e-22
ENSG00000129675.11	ARHGEF6	-0.275976	5.23497e-10
ENSG00000102606.13	ARHGEF7	-0.120717	0.0200089
ENSG00000131089.9	ARHGEF9	0.696518	1.00806e-16
ENSG00000117713.13	ARID1A	0.259699	0.0378744
ENSG00000049618.17	ARID1B	0.253868	0.000272802
ENSG00000189079.11	ARID2	0.254332	0.000190829
ENSG00000116017.6	ARID3A	-0.497964	6.86526e-08
ENSG00000032219.14	ARID4A	-0.188846	0.0357777
ENSG00000150347.10	ARID5B	0.330943	7.77858e-10
ENSG00000175414.6	ARL10	-0.891626	0.000174841
ENSG00000152213.3	ARL11	-0.898311	2.37873e-12
ENSG00000185305.6	ARL15	-0.22697	0.000117987
ENSG00000228696.4	ARL17B	0.280815	0.0363472
ENSG00000213465.3	ARL2	0.395112	7.70328e-06
ENSG00000122644.8	ARL4A	-0.546757	0.000890155
ENSG00000141748.8	ARL5C	-1.80819	0.0423037
ENSG00000113966.5	ARL6	-0.403885	0.000170431
ENSG00000196503.2	ARL9	-5.34219	2.90102e-16
ENSG00000104442.5	ARMC1	-0.188275	0.000693601
ENSG00000170632.9	ARMC10	-0.14278	0.0155964
ENSG00000140691.12	ARMC5	-0.373931	0.0162701
ENSG00000198960.6	ARMCX6	0.334399	0.000300126
ENSG00000029153.10	ARNTL2	-0.317322	0.000968822
ENSG00000241685.4	ARPC1A	0.154414	0.000274607
ENSG00000130429.8	ARPC1B	-0.137772	0.00322897
ENSG00000241553.8	ARPC4	-0.144209	0.00266606
ENSG00000172995.12	ARPP21	-1.10248	2.64683e-06
ENSG00000141480.13	ARRB2	0.296737	0.00664397
ENSG00000113369.4	ARRDC3	0.749453	8.44757e-21
ENSG00000088280.14	ASAP3	2.27229	1.41264e-85
ENSG00000196372.8	ASB13	-1.52375	1.88254e-176
ENSG00000100628.7	ASB2	-0.605515	5.08886e-07
ENSG00000112249.9	ASCC3	-0.174458	0.00125582
ENSG00000116539.6	ASH1L	0.140344	0.00631874
ENSG00000070669.12	ASNS	0.250975	1.08902e-09
ENSG00000171456.12	ASXL1	0.38429	1.1189e-18
ENSG00000197785.9	ATAD3A	0.125041	0.0160943
ENSG00000160072.15	ATAD3B	-0.145501	0.00369439
ENSG00000115966.12	ATF2	0.196097	0.000422136
ENSG00000162772.12	ATF3	1.54005	1.17166e-08
ENSG00000128272.10	ATF4	0.263322	3.46398e-15
ENSG00000118217.5	ATF6	-0.207279	0.000256947
ENSG00000171681.8	ATF7IP	0.231792	0.000458534
ENSG00000175224.12	ATG13	0.169932	0.00552481
ENSG00000085978.17	ATG16L1	0.135817	0.0440776
ENSG00000066739.7	ATG2B	0.109835	0.0486616
ENSG00000125703.10	ATG4C	-0.390053	0.000309991
ENSG00000197548.8	ATG7	0.331617	0.000596489
ENSG00000142102.11	ATHL1	-2.89526	1.61067e-13
ENSG00000119787.9	ATL2	-0.129883	0.0497306
ENSG00000149311.13	ATM	-0.259276	2.57852e-07
ENSG00000145246.9	ATP10D	0.314263	0.00155646
ENSG00000159363.13	ATP13A2	-0.281049	0.00101567
ENSG00000133657.10	ATP13A3	-0.256614	9.77757e-10
ENSG00000105409.11	ATP1A3	0.208554	0.00670092
ENSG00000143153.8	ATP1B1	-2.33025	2.29479e-06
ENSG00000174437.12	ATP2A2	0.126843	0.00188882
ENSG00000070961.10	ATP2B1	0.266892	2.22972e-09
ENSG00000058668.10	ATP2B4	0.730485	4.3056e-07
ENSG00000099624.3	ATP5D	-0.192995	0.0150668
ENSG00000124172.5	ATP5E	0.134102	0.0133517
ENSG00000159199.9	ATP5G1	-0.427945	9.14682e-30
ENSG00000135390.13	ATP5G2	0.306637	8.70965e-12
ENSG00000154723.8	ATP5J	-0.23234	0.0036883
ENSG00000071553.12	ATP6AP1	0.231723	0.000684152
ENSG00000033627.10	ATP6V0A1	0.809476	1.71384e-17
ENSG00000117410.9	ATP6V0B	-0.160869	0.0038123
ENSG00000171130.13	ATP6V0E2	-0.299908	0.000118096
ENSG00000114573.5	ATP6V1A	-0.501438	7.03483e-16
ENSG00000128524.4	ATP6V1F	-0.171982	0.00903652
ENSG00000136888.6	ATP6V1G1	0.270019	8.39568e-08
ENSG00000047249.12	ATP6V1H	-0.172372	0.00857055
ENSG00000143515.12	ATP8B2	0.303981	0.0163651
ENSG00000130270.12	ATP8B3	1.106	5.44284e-07
ENSG00000166377.15	ATP9B	-0.443471	1.50216e-05
ENSG00000123472.8	ATPAF1	0.545548	1.14164e-12
ENSG00000085224.16	ATRX	0.1195	0.0498365
ENSG00000168488.14	ATXN2L	0.248145	0.0228429
ENSG00000146776.10	ATXN7L1	-0.310477	0.0274435
ENSG00000253719.2	ATXN7L3B	-0.171552	0.00989259
ENSG00000103126.10	AXIN1	0.173313	0.00877064
ENSG00000168646.8	AXIN2	0.804502	0.0116967
ENSG00000141577.9	AZI1	0.195412	0.0457801
ENSG00000163512.9	AZI2	0.309581	0.00153508
ENSG00000166710.13	B2M	0.154672	0.0023037
ENSG00000187676.7	B3GALTL	-0.514818	1.05551e-05
ENSG00000170340.10	B3GNT2	-0.379116	1.06681e-08
ENSG00000176597.7	B3GNT5	-0.606861	0.0213527
ENSG00000135454.9	B4GALNT1	-0.707646	1.61274e-05
ENSG00000139044.6	B4GALNT3	-0.92165	0.00694025
ENSG00000086062.8	B4GALT1	-0.570442	1.74369e-11
ENSG00000158850.10	B4GALT3	0.20687	3.64195e-05
ENSG00000118276.7	B4GALT6	0.410455	0.0201802
ENSG00000112182.10	BACH2	0.290763	9.08794e-14
ENSG00000166170.9	BAG5	-0.157502	0.00213135
ENSG00000121753.8	BAI2	-0.72436	0.0426583
ENSG00000172530.15	BANP	0.227997	0.000133992
ENSG00000176788.7	BASP1	-1.61109	1.87931e-05
ENSG00000156127.6	BATF	-2.9621	0.0372894
ENSG00000168062.5	BATF2	-2.83609	0.0240494
ENSG00000087088.15	BAX	-0.202684	0.000553667
ENSG00000009954.6	BAZ1B	0.0865472	0.0122723
ENSG00000123636.13	BAZ2B	-0.317559	1.61274e-05
ENSG00000050820.12	BCAR1	-1.73218	5.18688e-28
ENSG00000137936.12	BCAR3	0.603569	4.86796e-08
ENSG00000116752.5	BCAS2	-0.196602	0.00432574
ENSG00000060982.10	BCAT1	0.166953	0.000398738
ENSG00000107949.12	BCCIP	-0.358806	3.31233e-13
ENSG00000119866.16	BCL11A	0.159583	0.00296662
ENSG00000171552.8	BCL2L1	0.301768	5.57248e-14
ENSG00000099968.13	BCL2L13	0.125528	0.0482016
ENSG00000129473.5	BCL2L2	-1.14535	2.02725e-12
ENSG00000113916.13	BCL6	0.13476	0.0105372
ENSG00000110987.4	BCL7A	0.34825	9.3235e-16
ENSG00000161267.7	BDH1	-0.255424	8.55082e-06
ENSG00000145734.14	BDP1	-0.21063	2.26666e-05
ENSG00000127325.14	BEST3	0.282238	6.63256e-14
ENSG00000103429.6	BFAR	-0.169637	0.00195585
ENSG00000180535.3	BHLHA15	0.987314	0.00807831
ENSG00000198908.7	BHLHB9	-5.29292	0.000161393
ENSG00000151746.9	BICD1	-0.177831	0.0454109
ENSG00000185963.9	BICD2	0.202056	1.796e-08
ENSG00000015475.14	BID	0.139106	0.0316875
ENSG00000100290.2	BIK	-0.263222	1.84345e-05
ENSG00000110934.6	BIN2	0.550969	0.00632265
ENSG00000089685.10	BIRC5	0.193686	0.000336316
ENSG00000115760.9	BIRC6	-0.111946	0.000958381
ENSG00000136573.8	BLK	0.298049	1.34488e-10
ENSG00000135441.3	BLOC1S1	0.278657	0.0190214
ENSG00000186222.3	BLOC1S4	-0.390005	0.00134476
ENSG00000090013.5	BLVRB	-0.204778	0.0402887
ENSG00000168283.9	BMI1	0.363016	7.52256e-05
ENSG00000138756.13	BMP2K	0.70837	4.90732e-34
ENSG00000152785.6	BMP3	0.139255	0.0020002
ENSG00000153162.8	BMP6	0.139901	0.0263434
ENSG00000101144.8	BMP7	0.186734	1.80189e-07
ENSG00000107779.7	BMPR1A	1.06546	5.22799e-12
ENSG00000138696.6	BMPR1B	-6.19944	9.45662e-06
ENSG00000204217.8	BMPR2	0.310552	0.000678546
ENSG00000165733.7	BMS1	-0.29695	1.86057e-13
ENSG00000140299.7	BNIP2	-0.222919	1.72773e-05
ENSG00000176171.7	BNIP3	0.14018	0.00345507
ENSG00000104765.10	BNIP3L	0.169664	0.0170515
ENSG00000145919.6	BOD1	-0.185576	0.00845304
ENSG00000169627.7	BOLA2B	-0.177814	0.000969672
ENSG00000136122.11	BORA	-0.174436	0.00294536
ENSG00000172331.7	BPGM	0.317317	6.6794e-05
ENSG00000162813.13	BPNT1	-0.381324	3.99246e-13
ENSG00000106009.11	BRAT1	-0.264773	1.89112e-05
ENSG00000169925.12	BRD3	0.77679	2.87403e-06
ENSG00000184992.10	BRI3BP	0.317978	1.691e-22
ENSG00000182685.3	BRICD5	0.366221	0.0166098
ENSG00000113460.8	BRIX1	-0.134446	0.0439174
ENSG00000254999.2	BRK1	-0.221239	3.96922e-06
ENSG00000160469.12	BRSK1	0.587858	0.000135429
ENSG00000119411.10	BSPRY	-1.54292	7.94442e-37
ENSG00000130303.8	BST2	0.137706	0.0186846
ENSG00000148925.6	BTBD10	-0.220943	0.00180577
ENSG00000184887.9	BTBD6	-0.409292	0.0389674
ENSG00000145741.11	BTF3	-0.111155	0.00292059
ENSG00000159388.5	BTG2	0.162397	0.000541259
ENSG00000010671.11	BTK	-0.12568	0.0352099
ENSG00000186265.5	BTLA	0.305671	0.00339174
ENSG00000026950.12	BTN3A1	0.456328	5.11964e-08
ENSG00000111801.11	BTN3A3	0.672058	1.27574e-13
ENSG00000166167.13	BTRC	-0.296943	0.000114882
ENSG00000169679.10	BUB1	-0.0984731	0.011705
ENSG00000156970.8	BUB1B	0.0933761	0.0497871
ENSG00000137656.7	BUD13	0.19186	0.00945384
ENSG00000106245.5	BUD31	0.22701	0.000367751
ENSG00000112578.5	BYSL	-0.224525	0.00118864
ENSG00000082153.13	BZW1	-0.169839	0.00257169
ENSG00000136261.10	BZW2	-0.127353	0.00278289
ENSG00000107938.13	C10orf137	0.113886	0.000695324
ENSG00000107815.3	C10orf2	-0.583052	1.75781e-27
ENSG00000137720.3	C11orf1	-0.511443	5.19517e-05
ENSG00000211450.5	C11orf31	0.258544	0.000251666
ENSG00000182919.10	C11orf54	0.198153	0.0368138
ENSG00000168005.4	C11orf84	0.143755	0.0492374
ENSG00000151131.5	C12orf45	-0.165858	0.0334245
ENSG00000111412.4	C12orf49	-0.215356	3.2826e-07
ENSG00000111678.6	C12orf57	0.610693	3.33658e-06
ENSG00000174456.9	C12orf76	0.191788	0.0476635
ENSG00000133935.6	C14orf1	0.383434	3.37286e-05
ENSG00000170270.4	C14orf142	-0.260657	0.00361144
ENSG00000133943.16	C14orf159	0.164641	0.0312451
ENSG00000087302.4	C14orf166	-0.209732	1.64339e-06
ENSG00000214900.4	C14orf182	-1.13792	0.00324038
ENSG00000100802.10	C14orf93	0.277651	0.017483
ENSG00000103544.10	C16orf62	0.287309	6.39409e-05
ENSG00000182831.7	C16orf72	0.176483	0.000943452
ENSG00000154102.6	C16orf74	-3.33985	1.61946e-27
ENSG00000155330.5	C16orf87	0.472143	1.03662e-15
ENSG00000196118.7	C16orf93	-0.411164	0.0256131
ENSG00000212719.6	C17orf51	-0.230268	0.0125584
ENSG00000178927.12	C17orf62	0.152475	0.00978393
ENSG00000185504.12	C17orf70	-0.264185	6.80714e-05
ENSG00000074356.12	C17orf85	0.179403	0.0114056
ENSG00000179294.5	C17orf96	0.512478	4.75598e-19
ENSG00000099625.8	C19orf26	-2.21506	0.0207761
ENSG00000167747.9	C19orf48	0.135497	0.00878393
ENSG00000130813.13	C19orf66	0.52198	0.000726369
ENSG00000116922.10	C1orf109	-0.200029	0.00139626
ENSG00000000460.12	C1orf112	-0.205425	0.0036825
ENSG00000197982.12	C1orf122	-0.293029	0.0186448
ENSG00000175707.7	C1orf172	-1.34496	0.0084116
ENSG00000196533.6	C1orf186	-0.868367	1.33888e-09
ENSG00000142686.7	C1orf216	0.268388	0.0242255
ENSG00000198520.6	C1orf228	-1.08416	0.0392726
ENSG00000228594.1	C1orf233	-4.23788	4.33014e-05
ENSG00000203724.6	C1orf53	0.607624	0.0452692
ENSG00000162585.12	C1orf86	0.413941	0.00277081
ENSG00000163145.8	C1QTNF7	1.69698	0.0100923
ENSG00000088854.11	C20orf194	-4.15251	6.34085e-15
ENSG00000101220.13	C20orf27	-0.155664	0.0182748
ENSG00000160298.13	C21orf58	0.179077	0.0184859
ENSG00000215012.4	C22orf29	-0.354171	1.75295e-09
ENSG00000157617.12	C2CD2	0.546148	9.26839e-06
ENSG00000111731.8	C2CD5	-0.190259	0.027666
ENSG00000118961.10	C2orf43	-0.28479	4.54546e-05
ENSG00000168887.6	C2orf68	0.150745	0.00659702
ENSG00000186132.10	C2orf76	0.347203	0.0017534
ENSG00000131379.5	C3orf20	0.274631	0.00288299
ENSG00000114529.8	C3orf52	0.200627	0.000189341
ENSG00000181744.4	C3orf58	-0.21665	0.000105639
ENSG00000154274.10	C4orf19	0.542946	0.0140391
ENSG00000197826.7	C4orf22	-0.414115	0.0216951
ENSG00000163633.6	C4orf36	1.19702	4.28508e-11
ENSG00000205208.4	C4orf46	-0.141081	0.0407393
ENSG00000197603.9	C5orf42	-1.53051	0.000868555
ENSG00000196821.5	C6orf106	-0.161161	0.000389438
ENSG00000185127.5	C6orf120	-0.148139	0.0463161
ENSG00000204439.3	C6orf47	0.350868	0.0123125
ENSG00000204387.8	C6orf48	0.359103	1.05759e-11
ENSG00000203711.7	C6orf99	0.744149	0.00993913
ENSG00000180354.11	C7orf41	-1.91591	1.24662e-15
ENSG00000122783.12	C7orf49	0.250299	0.000321756
ENSG00000164500.6	C7orf72	-1.08634	0.00156339
ENSG00000184608.4	C8orf12	0.389091	3.30344e-13
ENSG00000182307.8	C8orf33	-0.428214	2.39061e-16
ENSG00000113600.6	C9	1.16034	0.00739009
ENSG00000135045.6	C9orf40	-0.156642	0.0204949
ENSG00000157653.7	C9orf43	-0.53124	0.0307132
ENSG00000238227.3	C9orf69	0.150466	0.0167562
ENSG00000147894.10	C9orf72	-0.309647	0.000562279
ENSG00000136819.10	C9orf78	-0.304244	7.65456e-11
ENSG00000165233.13	C9orf89	-0.263333	0.0479098
ENSG00000157693.10	C9orf91	0.43194	1.49636e-23
ENSG00000185015.3	CA13	-0.414389	0.0289262
ENSG00000178538.5	CA8	-0.640356	5.09116e-06
ENSG00000120159.7	CAAP1	-0.162601	0.0273464
ENSG00000102547.14	CAB39L	-0.194664	0.0261478
ENSG00000134508.8	CABLES1	1.11583	9.56152e-56
ENSG00000149679.7	CABLES2	0.307687	0.00731768
ENSG00000160325.10	CACFD1	0.394251	0.00664138
ENSG00000151067.16	CACNA1C	-1.4179	0.0468188
ENSG00000151893.10	CACUL1	-0.193033	3.39874e-05
ENSG00000163618.13	CADPS	0.458839	5.15174e-25
ENSG00000138172.6	CALHM2	-0.369315	0.00804329
ENSG00000198668.6	CALM1	-0.158367	0.000464511
ENSG00000160014.12	CALM3	0.164318	8.37983e-06
ENSG00000179218.9	CALR	0.125146	0.000736303
ENSG00000183049.8	CAMK1D	0.205533	0.000659027
ENSG00000004660.10	CAMKK1	6.18666	5.19913e-06
ENSG00000110931.14	CAMKK2	0.184482	0.0033026
ENSG00000164047.3	CAMP	-0.87237	4.02242e-09
ENSG00000130559.14	CAMSAP1	0.127337	0.0172477
ENSG00000118200.10	CAMSAP2	0.467764	6.8718e-13
ENSG00000111530.8	CAND1	-0.128177	0.00570278
ENSG00000127022.10	CANX	0.173355	2.85517e-05
ENSG00000131236.12	CAP1	-0.236765	1.56878e-10
ENSG00000014216.11	CAPN1	-0.352287	2.94349e-11
ENSG00000103326.6	CAPN15	-0.351397	2.44128e-06
ENSG00000131375.5	CAPN7	-0.142424	0.0175384
ENSG00000116489.8	CAPZA1	-0.203887	0.000143496
ENSG00000198286.5	CARD11	-0.380051	7.32848e-11
ENSG00000204397.3	CARD16	7.44009	2.46504e-08
ENSG00000132357.9	CARD6	1.62774	0.0203444
ENSG00000153048.6	CARHSP1	0.197462	0.00395278
ENSG00000134905.12	CARS2	-0.155098	0.00118982
ENSG00000137752.18	CASP1	6.74791	1.01837e-06
ENSG00000196954.8	CASP4	-1.77688	0.000747342
ENSG00000165806.15	CASP7	0.407582	7.23614e-09
ENSG00000130940.10	CASZ1	2.20546	1.72674e-18
ENSG00000139899.6	CBLN3	0.805094	0.0298284
ENSG00000159228.8	CBR1	-1.04028	0.0327189
ENSG00000160200.13	CBS	0.187723	0.000160329
ENSG00000172785.14	CBWD1	-0.372708	1.99622e-21
ENSG00000136682.10	CBWD2	-0.371183	2.27008e-21
ENSG00000196873.11	CBWD3	-0.425109	7.72956e-31
ENSG00000147996.12	CBWD5	-0.42696	7.06387e-30
ENSG00000204790.8	CBWD6	-0.414466	4.31486e-30
ENSG00000215126.6	CBWD7	-0.416087	2.36133e-16
ENSG00000173894.6	CBX2	0.174689	0.0283368
ENSG00000141582.10	CBX4	0.242661	4.10616e-05
ENSG00000094916.9	CBX5	0.1786	2.97888e-05
ENSG00000183741.7	CBX6	-0.12707	0.00954891
ENSG00000100307.8	CBX7	0.682634	1.01489e-06
ENSG00000163001.7	CCDC104	-0.274809	0.0271835
ENSG00000005059.11	CCDC109B	0.161746	0.00329223
ENSG00000164221.8	CCDC112	-1.32806	9.9439e-20
ENSG00000136710.5	CCDC115	-0.202868	0.00680182
ENSG00000159873.5	CCDC117	0.225469	6.18046e-05
ENSG00000151773.8	CCDC122	-0.519	5.81208e-09
ENSG00000164366.3	CCDC127	0.399443	4.51713e-14
ENSG00000104957.9	CCDC130	0.206217	0.029234
ENSG00000100147.9	CCDC134	0.268877	0.00705166
ENSG00000185298.8	CCDC137	-0.200452	0.0032127
ENSG00000163006.7	CCDC138	0.17042	0.00390535
ENSG00000170160.12	CCDC144A	1.09239	2.27028e-18
ENSG00000198937.8	CCDC167	0.174817	0.0190998
ENSG00000164989.11	CCDC171	0.304129	2.68533e-06
ENSG00000147419.12	CCDC25	-0.250814	4.15065e-06
ENSG00000186710.7	CCDC42B	0.411624	1.84777e-06
ENSG00000164051.9	CCDC51	-0.162395	0.0386081
ENSG00000160124.5	CCDC58	-0.379348	9.60939e-05
ENSG00000133773.7	CCDC59	-0.266694	0.000228595
ENSG00000198624.8	CCDC69	0.116347	0.000450959
ENSG00000163040.10	CCDC74A	0.550892	0.0364008
ENSG00000149231.7	CCDC82	0.200556	0.0227953
ENSG00000110104.7	CCDC86	-0.49078	1.62633e-07
ENSG00000015133.14	CCDC88C	0.33256	7.48557e-19
ENSG00000137500.5	CCDC90B	0.17556	0.0231223
ENSG00000157456.3	CCNB2	0.146277	0.00285572
ENSG00000112576.8	CCND3	-0.321623	1.84548e-12
ENSG00000105173.9	CCNE1	-0.502169	7.77042e-12
ENSG00000205089.3	CCNI2	-0.535623	0.0430968
ENSG00000221978.7	CCNL2	0.253088	4.64348e-06
ENSG00000129315.5	CCNT1	-0.136695	0.0244047
ENSG00000082258.8	CCNT2	0.207107	0.000251077
ENSG00000163249.5	CCNYL1	-0.339993	0.00708089
ENSG00000103540.12	CCP110	-0.167721	0.0207668
ENSG00000173992.4	CCS	0.294678	0.00463158
ENSG00000154429.6	CCSAP	-0.476615	1.3562e-09
ENSG00000107771.11	CCSER2	0.38191	5.22596e-07
ENSG00000166226.8	CCT2	-0.190923	0.000253417
ENSG00000163468.10	CCT3	-0.254923	1.54188e-14
ENSG00000115484.10	CCT4	-0.193384	1.24619e-06
ENSG00000146731.6	CCT6A	-0.221341	1.10103e-09
ENSG00000135624.11	CCT7	-0.241303	3.10477e-11
ENSG00000156261.8	CCT8	-0.226935	3.84227e-06
ENSG00000135535.10	CD164	-0.135126	0.0105598
ENSG00000134061.4	CD180	-2.28425	6.80838e-105
ENSG00000177455.7	CD19	-0.413155	4.76707e-26
ENSG00000158481.8	CD1C	-0.664824	0.00342081
ENSG00000012124.10	CD22	0.179605	0.000195177
ENSG00000198821.6	CD247	-1.75434	1.0034e-05
ENSG00000139193.3	CD27	0.223436	0.000168728
ENSG00000120217.9	CD274	1.1562	0.000996458
ENSG00000178562.13	CD28	-0.419923	0.00622102
ENSG00000169217.4	CD2BP2	0.112448	0.020742
ENSG00000104894.7	CD37	0.301618	0.000206181
ENSG00000004468.8	CD38	0.350451	3.85139e-31
ENSG00000117877.6	CD3EAP	-0.534831	2.1141e-09
ENSG00000117335.14	CD46	0.269365	3.51636e-08
ENSG00000169442.4	CD52	-0.544914	7.17927e-32
ENSG00000143119.8	CD53	-0.72826	3.52229e-91
ENSG00000085063.10	CD59	0.470856	3.21113e-10
ENSG00000110848.4	CD69	0.447628	0.0224013
ENSG00000137101.8	CD72	-0.333969	1.98793e-06
ENSG00000019582.10	CD74	0.410922	7.08005e-15
ENSG00000007312.8	CD79B	0.279561	1.02614e-12
ENSG00000110651.7	CD81	0.279164	3.66624e-10
ENSG00000085117.7	CD82	-2.15573	1.45897e-12
ENSG00000112149.5	CD83	-0.27133	0.0131672
ENSG00000066294.10	CD84	-0.787728	1.84487e-08
ENSG00000114013.11	CD86	0.400094	0.00352013
ENSG00000102181.15	CD99L2	0.261513	0.023735
ENSG00000079335.13	CDC14A	-0.913764	8.00204e-07
ENSG00000117399.9	CDC20	-0.0974676	0.0487328
ENSG00000158402.14	CDC25C	0.340127	0.000982098
ENSG00000176386.4	CDC26	-0.271131	0.000478093
ENSG00000105401.2	CDC37	-0.111422	0.0167248
ENSG00000106993.7	CDC37L1	-0.3038	0.00200375
ENSG00000168438.10	CDC40	-0.335328	4.38242e-10
ENSG00000171219.8	CDC42BPG	-0.777089	2.23146e-11
ENSG00000094804.5	CDC6	0.167075	1.26637e-05
ENSG00000097046.8	CDC7	-0.157012	0.0112104
ENSG00000164649.15	CDCA7L	-0.24238	1.09096e-06
ENSG00000128536.11	CDHR3	0.550726	8.67824e-16
ENSG00000185324.17	CDK10	0.20016	0.0158691
ENSG00000065883.10	CDK13	0.148412	4.9364e-05
ENSG00000058091.12	CDK14	0.154159	0.000329965
ENSG00000102225.11	CDK16	0.194204	0.0170977
ENSG00000117266.11	CDK18	1.05675	0.000484986
ENSG00000156345.13	CDK20	0.312619	0.0079707
ENSG00000105810.5	CDK6	-0.276786	1.18776e-14
ENSG00000145996.7	CDKAL1	-0.128489	0.0468355
ENSG00000100490.5	CDKL1	-0.349423	0.028666
ENSG00000008086.6	CDKL5	1.13001	0.0278678
ENSG00000111276.6	CDKN1B	-0.590141	3.75488e-05
ENSG00000147889.12	CDKN2A	0.223708	0.0038123
ENSG00000167513.4	CDT1	0.152355	0.0211432
ENSG00000091527.11	CDV3	0.121097	0.00941755
ENSG00000153046.13	CDYL	0.431925	2.18456e-16
ENSG00000007129.13	CEACAM21	-0.386435	0.0143908
ENSG00000153879.4	CEBPG	0.22708	6.0113e-05
ENSG00000115816.9	CEBPZ	-0.219012	5.09524e-05
ENSG00000093072.11	CECR1	0.485567	3.43465e-09
ENSG00000075275.12	CELSR1	0.587688	8.4841e-07
ENSG00000115163.10	CENPA	0.269661	7.64378e-05
ENSG00000102384.9	CENPI	0.347577	2.87978e-09
ENSG00000151849.10	CENPJ	0.231244	6.3975e-06
ENSG00000100162.10	CENPM	0.273833	8.04874e-09
ENSG00000166451.9	CENPN	0.163764	0.0415757
ENSG00000138092.6	CENPO	0.159668	0.020619
ENSG00000102901.8	CENPT	0.223901	0.00465295
ENSG00000166582.5	CENPV	0.38498	3.00462e-09
ENSG00000174799.6	CEP135	0.161184	0.0367543
ENSG00000103995.9	CEP152	0.114717	0.0375541
ENSG00000135837.11	CEP350	-0.0947042	0.0302288
ENSG00000166037.6	CEP57	-0.190053	0.000184514
ENSG00000011523.9	CEP68	-0.267822	1.71234e-05
ENSG00000114107.4	CEP70	0.675801	1.03951e-45
ENSG00000112877.6	CEP72	-0.203818	0.0414281
ENSG00000130695.9	CEP85	0.179307	0.000252386
ENSG00000134255.9	CEPT1	-0.292323	1.65279e-07
ENSG00000100422.9	CERK	-0.217987	5.08883e-06
ENSG00000188452.9	CERKL	0.359839	0.00360912
ENSG00000172828.8	CES3	-0.513986	0.00420677
ENSG00000172824.10	CES4A	-0.793857	0.0150129
ENSG00000147400.8	CETN2	0.352981	0.00307471
ENSG00000197766.3	CFD	-1.05063	3.82797e-07
ENSG00000165410.10	CFL2	0.215721	0.00933262
ENSG00000003402.15	CFLAR	0.690446	4.97965e-30
ENSG00000143375.10	CGN	-0.43431	0.0298401
ENSG00000128965.7	CHAC1	0.860129	2.40936e-17
ENSG00000163528.8	CHCHD4	-0.249907	0.000127063
ENSG00000159685.6	CHCHD6	-0.588938	0.00307765
ENSG00000153922.6	CHD1	0.459712	2.00136e-05
ENSG00000131778.13	CHD1L	-0.279818	9.16752e-07
ENSG00000173575.14	CHD2	0.134338	0.00371602
ENSG00000170004.12	CHD3	0.0995874	0.0422412
ENSG00000100888.8	CHD8	-0.0790034	0.0254623
ENSG00000177200.11	CHD9	0.144574	0.00169154
ENSG00000183765.16	CHEK2	-0.3571	1.15464e-06
ENSG00000064886.9	CHI3L2	-1.60343	4.45214e-15
ENSG00000177830.13	CHID1	-0.313948	1.55773e-06
ENSG00000110721.7	CHKA	0.233924	0.000651649
ENSG00000130724.4	CHMP2A	0.278628	0.000447443
ENSG00000147457.9	CHMP7	-0.169719	4.67122e-05
ENSG00000111666.6	CHPT1	0.333508	7.49351e-06
ENSG00000169684.9	CHRNA5	-0.474016	0.0395785
ENSG00000115526.6	CHST10	0.221982	0.00171711
ENSG00000171310.6	CHST11	2.00405	0.0018455
ENSG00000136213.7	CHST12	0.329859	0.00111485
ENSG00000182022.13	CHST15	0.397018	1.17287e-18
ENSG00000258289.3	CHURC1	-0.275158	0.000411947
ENSG00000185043.6	CIB1	-0.351195	0.00284139
ENSG00000079432.3	CIC	0.405712	1.00345e-06
ENSG00000179583.13	CIITA	0.312939	1.3135e-06
ENSG00000099622.9	CIRBP	0.167836	0.00242207
ENSG00000122873.7	CISD1	-0.150401	0.0261756
ENSG00000122966.9	CIT	0.163711	0.00555398
ENSG00000148337.15	CIZ1	0.217274	0.000923114
ENSG00000136026.9	CKAP4	-0.511133	5.2773e-11
ENSG00000166165.8	CKB	-1.77193	0.00503381
ENSG00000223572.5	CKMT1A	-3.53618	4.73886e-41
ENSG00000237289.5	CKMT1B	-4.03665	7.46895e-43
ENSG00000123975.4	CKS2	0.24669	1.89163e-06
ENSG00000104859.10	CLASRP	0.192729	0.00976474
ENSG00000073464.7	CLCN4	-0.32496	1.44098e-06
ENSG00000011021.17	CLCN6	0.427785	5.67941e-08
ENSG00000080822.12	CLDND1	-0.265486	0.000187859
ENSG00000187912.7	CLEC17A	-3.2041	1.78106e-07
ENSG00000110852.4	CLEC2B	3.20899	4.47991e-15
ENSG00000069493.10	CLEC2D	0.174909	6.71058e-05
ENSG00000184293.3	CLECL1	-0.296746	0.0255595
ENSG00000153132.8	CLGN	1.56473	7.33242e-21
ENSG00000162994.11	CLHC1	-0.338389	0.0266356
ENSG00000169504.10	CLIC4	0.245376	2.17122e-08
ENSG00000113282.9	CLINT1	-0.145989	0.00156377
ENSG00000176444.14	CLK2	0.194471	0.00684622
ENSG00000128973.7	CLN6	0.308041	1.94456e-05
ENSG00000074201.4	CLNS1A	-0.313574	7.27083e-14
ENSG00000172409.5	CLP1	-0.198612	0.0116349
ENSG00000162129.8	CLPB	-0.287009	8.12076e-05
ENSG00000104853.11	CLPTM1	0.198855	0.00249253
ENSG00000049656.9	CLPTM1L	0.174705	3.00263e-08
ENSG00000171603.12	CLSTN1	0.247938	0.000121332
ENSG00000139182.9	CLSTN3	-0.229868	0.0335643
ENSG00000175416.8	CLTB	-0.212428	0.00094839
ENSG00000184220.6	CMSS1	-0.326325	2.22452e-09
ENSG00000183723.8	CMTM4	-1.78106	0.000728912
ENSG00000153551.9	CMTM7	-0.555591	0.000280121
ENSG00000170293.4	CMTM8	-5.63879	3.70056e-05
ENSG00000169714.12	CNBP	0.0915947	0.0338625
ENSG00000133313.10	CNDP2	-0.193944	0.0101853
ENSG00000170289.8	CNGB3	0.766632	1.13634e-06
ENSG00000149970.10	CNKSR2	0.235934	0.0232377
ENSG00000064666.10	CNN2	-0.532758	6.64152e-40
ENSG00000111596.7	CNOT2	0.197668	0.000238086
ENSG00000138767.8	CNOT6L	-0.217462	7.43094e-05
ENSG00000198791.7	CNOT7	-0.183527	0.00158324
ENSG00000115649.11	CNPPD1	-0.248498	1.80015e-05
ENSG00000118432.11	CNR1	-0.430012	2.66986e-09
ENSG00000162852.9	CNST	-0.222609	1.29168e-05
ENSG00000174469.13	CNTNAP2	-1.91501	0.00727842
ENSG00000170037.9	CNTROB	0.153951	0.0174703
ENSG00000106603.13	COA1	0.154194	0.00560648
ENSG00000082438.11	COBLL1	0.168766	0.0205004
ENSG00000136152.10	COG3	0.129546	0.00611802
ENSG00000213380.9	COG8	0.159638	0.048881
ENSG00000139219.13	COL2A1	1.82183	0.0336322
ENSG00000049089.9	COL9A2	-0.450132	0.000125343
ENSG00000198756.6	COLGALT2	2.18046	0.0050327
ENSG00000145781.4	COMMD10	-0.479504	5.01184e-07
ENSG00000148444.11	COMMD3	0.425242	0.00462902
ENSG00000140365.11	COMMD4	0.184782	0.0217542
ENSG00000149600.7	COMMD7	0.269866	0.000364617
ENSG00000093010.7	COMT	0.176503	0.000735863
ENSG00000165644.6	COMTD1	-0.298765	1.38545e-05
ENSG00000105669.8	COPE	0.265286	1.10001e-06
ENSG00000181789.10	COPG1	0.247673	1.86792e-09
ENSG00000166200.10	COPS2	-0.144452	0.0300375
ENSG00000138663.4	COPS4	-0.209478	0.00418065
ENSG00000111481.5	COPZ1	0.198151	0.00198176
ENSG00000115520.4	COQ10B	0.188364	0.0476635
ENSG00000173085.9	COQ2	0.347262	4.80001e-05
ENSG00000167113.6	COQ4	-0.191868	0.00694738
ENSG00000110871.10	COQ5	0.294655	0.0155294
ENSG00000102879.11	CORO1A	-0.197277	3.15803e-05
ENSG00000110880.6	CORO1C	0.344066	2.67974e-13
ENSG00000167549.14	CORO6	-0.638244	0.0476953
ENSG00000103187.6	COTL1	-1.23081	1.90686e-139
ENSG00000178449.4	COX14	-0.220995	0.0193095
ENSG00000133983.10	COX16	0.53134	1.46197e-06
ENSG00000135940.2	COX5B	0.100763	0.0499379
ENSG00000126267.4	COX6B1	0.145046	0.00119263
ENSG00000108582.7	CPD	0.191916	0.000485289
ENSG00000107864.10	CPEB3	0.526975	0.00225392
ENSG00000113742.8	CPEB4	0.445524	4.13039e-15
ENSG00000106034.13	CPED1	1.40407	0.0115159
ENSG00000140848.12	CPNE2	0.769347	4.40955e-59
ENSG00000085719.7	CPNE3	0.227824	7.52444e-05
ENSG00000100884.5	CPNE6	-1.3846	0.0100939
ENSG00000111605.12	CPSF6	-0.164827	0.000372093
ENSG00000110090.8	CPT1A	0.921044	4.40461e-35
ENSG00000117322.12	CR2	-0.741718	4.66254e-05
ENSG00000169372.8	CRADD	0.4393	0.00270899
ENSG00000148204.7	CRB2	0.590077	0.00798037
ENSG00000182158.10	CREB3L2	0.567046	6.58495e-11
ENSG00000146592.12	CREB5	0.583765	4.04911e-16
ENSG00000005339.8	CREBBP	0.341934	7.45498e-05
ENSG00000111269.2	CREBL2	-3.40419	7.4347e-51
ENSG00000143162.7	CREG1	-0.39055	2.44261e-10
ENSG00000150938.5	CRIM1	-0.810252	2.3744e-55
ENSG00000119878.5	CRIPT	0.299902	0.0181249
ENSG00000088766.7	CRLS1	-0.311533	4.89127e-08
ENSG00000140577.11	CRTC3	0.603905	0.00040854
ENSG00000233280.2	CRYBG3	0.378378	0.000819174
ENSG00000080200.5	CRYBG3	0.435932	0.00208464
ENSG00000062485.14	CS	0.0989556	0.0345482
ENSG00000139631.14	CSAD	0.394486	0.0155654
ENSG00000100368.9	CSF2RB	0.264165	3.67145e-10
ENSG00000151292.13	CSNK1G3	0.331081	7.51339e-09
ENSG00000101266.12	CSNK2A1	-0.199445	9.27992e-08
ENSG00000159176.9	CSRP1	-0.39933	8.38738e-16
ENSG00000101138.7	CSTF1	-0.240233	3.14351e-05
ENSG00000176102.7	CSTF3	-0.158844	0.0313622
ENSG00000102974.10	CTCF	0.146089	0.00792316
ENSG00000175215.5	CTDSP2	0.421365	2.46678e-21
ENSG00000137770.9	CTDSPL2	0.133357	0.01081
ENSG00000116761.7	CTH	0.38761	0.000427456
ENSG00000066032.14	CTNNA2	1.72884	3.4427e-35
ENSG00000119326.10	CTNNAL1	0.147368	0.0356508
ENSG00000168036.12	CTNNB1	-0.13901	0.000677238
ENSG00000178585.10	CTNNBIP1	0.231058	0.0217763
ENSG00000198561.8	CTNND1	0.317607	0.0010046
ENSG00000171793.9	CTPS1	0.102611	0.0166557
ENSG00000198730.3	CTR9	-0.192758	0.000477097
ENSG00000164733.16	CTSB	0.610669	1.30596e-05
ENSG00000109861.11	CTSC	-0.197644	3.81427e-06
ENSG00000256043.2	CTSO	0.943342	8.20253e-06
ENSG00000163131.6	CTSS	0.163868	0.0292563
ENSG00000085733.11	CTTN	1.45841	1.55145e-121
ENSG00000143079.10	CTTNBP2NL	-1.99297	3.62077e-10
ENSG00000174177.8	CTU2	-0.448507	1.66381e-09
ENSG00000158290.12	CUL4B	-0.214313	0.00171711
ENSG00000044090.4	CUL7	0.355809	4.21187e-05
ENSG00000111249.9	CUX2	1.23906	4.86968e-63
ENSG00000121966.6	CXCR4	0.176884	3.45181e-07
ENSG00000197021.4	CXorf40B	-0.313337	0.000251057
ENSG00000154832.10	CXXC1	-0.195142	6.85777e-05
ENSG00000171604.7	CXXC5	-0.499137	3.58262e-12
ENSG00000008283.11	CYB561	-2.35752	0.00465509
ENSG00000162144.5	CYB561A3	0.156307	0.002656
ENSG00000166347.14	CYB5A	0.301713	0.0015449
ENSG00000103018.12	CYB5B	0.168845	0.00027112
ENSG00000065615.9	CYB5R4	0.167034	0.00478739
ENSG00000179091.4	CYC1	-0.125534	0.00864176
ENSG00000172115.4	CYCS	-0.293797	1.55348e-11
ENSG00000055163.14	CYFIP2	0.241119	2.33105e-06
ENSG00000119004.10	CYP20A1	0.188664	0.0290679
ENSG00000111012.5	CYP27B1	-0.36873	0.0263039
ENSG00000186104.6	CYP2R1	0.801067	1.16917e-14
ENSG00000155016.13	CYP2U1	-0.412156	3.14467e-10
ENSG00000001630.11	CYP51A1	0.797239	1.61931e-20
ENSG00000108669.12	CYTH1	0.530676	4.96289e-33
ENSG00000100055.16	CYTH4	-2.6544	2.33044e-13
ENSG00000100592.11	DAAM1	-0.118913	0.0308315
ENSG00000136848.12	DAB2IP	-1.73597	1.7558e-27
ENSG00000197380.6	DACT3	-1.36762	0.0393584
ENSG00000129562.6	DAD1	0.161874	0.0115614
ENSG00000149476.10	DAK	0.521676	8.24721e-12
ENSG00000070190.8	DAPP1	-0.122389	0.0236394
ENSG00000183283.11	DAZAP2	0.127484	0.0153852
ENSG00000155368.12	DBI	0.232107	3.32731e-08
ENSG00000113758.9	DBN1	-3.56227	1.84055e-244
ENSG00000122741.11	DCAF10	0.287433	0.00031558
ENSG00000164934.9	DCAF13	-0.412402	2.28898e-15
ENSG00000132017.6	DCAF15	0.248732	0.00133738
ENSG00000163257.6	DCAF16	-0.116221	0.0109931
ENSG00000115827.9	DCAF17	0.12937	0.0430847
ENSG00000156136.5	DCK	0.149457	0.00332262
ENSG00000129187.10	DCTD	-0.58321	8.5327e-12
ENSG00000204843.8	DCTN1	0.151112	0.000194773
ENSG00000179958.4	DCTPP1	-0.238894	4.19005e-05
ENSG00000150401.10	DCUN1D2	0.206001	0.0226786
ENSG00000137692.7	DCUN1D5	-0.245232	3.08607e-05
ENSG00000167986.9	DDB1	-0.135289	0.000206882
ENSG00000134574.7	DDB2	-0.715003	0.00516679
ENSG00000197312.7	DDI2	-0.220091	2.06242e-06
ENSG00000168209.4	DDIT4	0.940245	1.26439e-21
ENSG00000244038.5	DDOST	0.103377	0.0271705
ENSG00000204580.7	DDR1	-1.23018	4.80201e-29
ENSG00000178105.5	DDX10	-0.359926	3.20147e-13
ENSG00000013573.12	DDX11	0.145297	0.00277081
ENSG00000168872.11	DDX19A	-0.245756	3.73674e-08
ENSG00000174243.5	DDX23	-0.0800277	0.0430847
ENSG00000089737.11	DDX24	-0.120061	0.00337096
ENSG00000124228.10	DDX27	-0.182896	4.00452e-05
ENSG00000182810.5	DDX28	-0.196322	0.0233021
ENSG00000125485.13	DDX31	-0.159786	0.0129106
ENSG00000123136.10	DDX39A	-0.114048	0.00228881
ENSG00000215301.5	DDX3X	-0.107272	0.0189062
ENSG00000105671.7	DDX49	-0.186267	0.000201646
ENSG00000107625.8	DDX50	-0.226505	0.000155865
ENSG00000185163.5	DDX51	-0.466429	4.81269e-26
ENSG00000123064.8	DDX54	0.128019	0.000947186
ENSG00000136271.6	DDX56	-0.196263	2.0256e-06
ENSG00000118197.9	DDX59	0.312039	0.00404066
ENSG00000110367.7	DDX6	-0.613981	1.98066e-46
ENSG00000023892.9	DEF6	-0.460585	2.73097e-12
ENSG00000164822.4	DEFA6	-1.29092	0.0475599
ENSG00000168350.6	DEGS2	-0.334396	0.000653795
ENSG00000213047.7	DENND1B	0.427433	6.81225e-13
ENSG00000175984.10	DENND2C	-2.03134	3.0153e-18
ENSG00000162777.12	DENND2D	-0.252335	0.000652973
ENSG00000105339.6	DENND3	-1.63819	1.26186e-71
ENSG00000170456.10	DENND5B	0.298519	3.45181e-07
ENSG00000174839.8	DENND6A	0.163795	0.00525776
ENSG00000024526.12	DEPDC1	-0.469839	1.56558e-13
ENSG00000100150.12	DEPDC5	-0.152818	0.0169426
ENSG00000155792.5	DEPTOR	0.251199	1.22193e-09
ENSG00000023697.8	DERA	0.131251	0.0263919
ENSG00000121644.14	DESI2	-0.193597	0.000103971
ENSG00000160049.7	DFFA	-0.211717	2.89663e-07
ENSG00000062282.10	DGAT2	-0.75468	6.97067e-09
ENSG00000065357.15	DGKA	-0.55329	2.14501e-11
ENSG00000077044.5	DGKD	0.456781	9.03211e-26
ENSG00000153933.5	DGKE	-0.244713	6.03603e-05
ENSG00000157680.11	DGKI	-0.24846	2.43243e-06
ENSG00000116133.7	DHCR24	0.526312	3.00824e-49
ENSG00000172893.11	DHCR7	0.715315	1.23086e-54
ENSG00000104808.3	DHDH	-4.16716	5.22381e-05
ENSG00000228716.2	DHFR	-0.223031	1.96713e-05
ENSG00000102796.6	DHRS12	-0.401713	0.00395293
ENSG00000169084.8	DHRSX	0.286436	0.043698
ENSGR0000169084.8	DHRSX	0.286436	0.043698
ENSG00000132153.10	DHX30	-0.149427	0.000244511
ENSG00000005100.8	DHX33	-0.470094	3.9067e-13
ENSG00000134815.14	DHX34	-0.256423	1.59496e-06
ENSG00000150990.3	DHX37	-0.284741	1.64812e-11
ENSG00000108771.8	DHX58	1.52623	2.59411e-09
ENSG00000117597.13	DIEXF	-0.644462	4.77511e-22
ENSG00000151240.11	DIP2C	-1.92459	0.0242257
ENSG00000083520.10	DIS3	-0.236174	2.4823e-09
ENSG00000140323.4	DISP2	-1.45935	1.73377e-08
ENSG00000130826.11	DKC1	0.0983009	0.0318536
ENSG00000150768.11	DLAT	0.180686	4.23329e-05
ENSG00000091140.8	DLD	-0.166765	0.00163997
ENSG00000075711.16	DLG1	-0.102186	0.0343996
ENSG00000150672.12	DLG2	-1.70772	9.91043e-77
ENSG00000080845.13	DLGAP4	-0.684882	3.02553e-05
ENSG00000090932.6	DLL3	-0.348936	0.00830419
ENSG00000104936.13	DMPK	0.28447	0.0323326
ENSG00000135164.14	DMTF1	0.118805	0.0200543
ENSG00000172869.10	DMXL1	-0.190586	0.000270594
ENSG00000086061.11	DNAJA1	0.200001	0.000102148
ENSG00000103423.9	DNAJA3	-0.106403	0.0278678
ENSG00000132002.3	DNAJB1	0.400909	4.56183e-16
ENSG00000135924.11	DNAJB2	0.223688	0.00314124
ENSG00000136770.6	DNAJC1	0.416869	0.00913977
ENSG00000077232.12	DNAJC10	-0.275568	3.64904e-10
ENSG00000007923.11	DNAJC11	-0.128635	0.0245587
ENSG00000138246.11	DNAJC13	0.264913	1.01048e-09
ENSG00000120675.4	DNAJC15	1.11573	1.088e-17
ENSG00000116675.11	DNAJC6	-0.20645	0.000754601
ENSG00000213918.6	DNASE1	0.279755	0.000107575
ENSG00000105612.4	DNASE2	-0.214506	0.0275611
ENSG00000179532.8	DNHD1	0.338931	0.0167884
ENSG00000087470.13	DNM1L	-0.148651	0.000131042
ENSG00000107554.11	DNMBP	0.30082	8.17344e-08
ENSG00000119772.12	DNMT3A	-0.793611	0.00632265
ENSG00000088305.14	DNMT3B	0.515456	1.06023e-15
ENSG00000067334.9	DNTTIP2	-0.246359	1.26499e-07
ENSG00000147251.11	DOCK11	0.12311	0.0452158
ENSG00000134516.11	DOCK2	-0.173076	3.86808e-05
ENSG00000130158.9	DOCK6	-0.335599	0.0069455
ENSG00000107099.11	DOCK8	-0.37769	1.07324e-18
ENSG00000088387.13	DOCK9	-0.532965	1.30915e-53
ENSG00000146094.9	DOK3	0.2269	0.000917231
ENSG00000125170.6	DOK4	-1.39514	8.637e-07
ENSG00000159147.13	DONSON	0.298941	7.77278e-06
ENSG00000083097.10	DOPEY1	-0.415757	2.74422e-09
ENSG00000011332.15	DPF1	-0.460194	4.23136e-08
ENSG00000108963.13	DPH1	-0.565239	1.78362e-05
ENSG00000132768.9	DPH2	-0.464928	1.55876e-19
ENSG00000117543.15	DPH5	-0.324924	0.000360001
ENSG00000000419.8	DPM1	-0.166653	0.020468
ENSG00000136908.13	DPM2	0.218243	0.0246862
ENSG00000177990.7	DPY19L2	0.24699	0.000599715
ENSG00000188641.8	DPYD	-0.598667	3.40894e-17
ENSG00000092964.12	DPYSL2	0.513561	1.08481e-44
ENSG00000151640.8	DPYSL4	-1.74175	0.0040684
ENSG00000185721.7	DRG1	-0.149952	0.00936949
ENSG00000102385.8	DRP2	1.11935	0.0312169
ENSG00000151914.13	DST	0.595907	6.68506e-21
ENSG00000133059.12	DSTYK	-0.342899	8.36031e-05
ENSG00000138101.14	DTNB	0.252723	0.0352099
ENSG00000135144.3	DTX1	0.225287	3.03756e-06
ENSG00000167264.13	DUS2	-0.283121	0.0018715
ENSG00000141994.11	DUS3L	-0.145814	0.00622102
ENSG00000105865.6	DUS4L	-0.37546	1.09661e-05
ENSG00000143507.13	DUSP10	1.20241	1.35968e-05
ENSG00000112679.10	DUSP22	0.356481	1.11578e-13
ENSG00000164086.8	DUSP7	-0.818938	3.47913e-15
ENSG00000128951.9	DUT	-0.137463	0.0231892
ENSG00000107404.13	DVL1	0.211165	0.00186102
ENSG00000197102.6	DYNC1H1	0.171602	9.04241e-05
ENSG00000077380.11	DYNC1I2	-0.230414	0.000908539
ENSG00000144635.4	DYNC1LI1	-0.140034	0.0455229
ENSG00000165169.6	DYNLT3	-0.497003	1.72519e-05
ENSG00000157540.15	DYRK1A	0.0939434	0.0439174
ENSG00000127334.10	DYRK2	-0.206168	9.80553e-06
ENSG00000143479.11	DYRK3	-0.582741	6.30944e-10
ENSG00000089091.12	DZANK1	-0.453787	0.0137336
ENSG00000101412.9	E2F1	0.173136	0.000445975
ENSG00000007968.6	E2F2	0.219684	7.56522e-11
ENSG00000205250.4	E2F4	-0.347534	4.97524e-12
ENSG00000103356.11	EARS2	0.18572	0.00589817
ENSG00000164330.12	EBF1	0.204345	0.00665161
ENSG00000147155.6	EBP	0.416452	1.49171e-16
ENSG00000123179.9	EBPL	-0.295276	0.000290007
ENSG00000117298.10	ECE1	-3.04573	2.12463e-101
ENSG00000145194.13	ECE2	-0.418883	3.03695e-12
ENSG00000167969.8	ECI1	0.185565	0.0134293
ENSG00000198721.8	ECI2	0.745564	3.08572e-19
ENSG00000088298.8	EDEM2	0.331072	0.000350778
ENSG00000116406.14	EDEM3	-0.148077	0.00555635
ENSG00000074266.13	EED	-0.155164	0.0243192
ENSG00000156508.13	EEF1A1	0.217941	3.2826e-07
ENSG00000167658.11	EEF2	0.12003	0.00169001
ENSG00000103319.7	EEF2K	-0.141079	0.0330841
ENSG00000122547.6	EEPD1	1.10148	2.63014e-08
ENSG00000130038.5	EFCAB4B	-0.198829	0.006039
ENSG00000108883.8	EFTUD2	-0.125165	0.00847284
ENSG00000241404.2	EGFL8	-1.55386	0.0277331
ENSG00000269858.1	EGLN2	0.200698	0.0345276
ENSG00000173442.7	EHBP1L1	0.322567	1.34724e-05
ENSG00000110047.13	EHD1	-0.24561	1.71655e-05
ENSG00000103966.5	EHD4	-0.197286	0.000679476
ENSG00000181090.13	EHMT1	0.148814	0.000261687
ENSG00000086232.8	EIF2AK1	0.149084	0.00155947
ENSG00000055332.12	EIF2AK2	2.85278	3.98002e-90
ENSG00000172071.7	EIF2AK3	0.216527	1.21522e-09
ENSG00000128829.7	EIF2AK4	-0.683495	4.16691e-14
ENSG00000111361.8	EIF2B1	-0.243278	2.40952e-06
ENSG00000119718.6	EIF2B2	-0.260814	0.000568888
ENSG00000145191.7	EIF2B5	-0.0952946	0.022137
ENSG00000134001.8	EIF2S1	-0.371094	1.73679e-12
ENSG00000107581.8	EIF3A	0.0935129	0.0451415
ENSG00000106263.13	EIF3B	-0.267314	5.76402e-18
ENSG00000184110.10	EIF3C	-0.216734	0.000241632
ENSG00000205609.8	EIF3CL	-0.225914	0.000123271
ENSG00000100353.13	EIF3D	-0.147173	1.22653e-05
ENSG00000130811.6	EIF3G	-0.134329	0.00278289
ENSG00000147677.6	EIF3H	-0.170569	2.79116e-05
ENSG00000084623.7	EIF3I	-0.252962	3.65592e-11
ENSG00000149100.8	EIF3M	-0.371924	7.81385e-14
ENSG00000156976.10	EIF4A2	0.120034	0.0359454
ENSG00000141543.5	EIF4A3	-0.207031	2.31202e-08
ENSG00000187840.4	EIF4EBP1	0.547265	4.79912e-11
ENSG00000148730.6	EIF4EBP2	0.29187	4.50592e-10
ENSG00000184708.13	EIF4ENIF1	0.203567	0.00500352
ENSG00000110321.11	EIF4G2	0.121023	0.000145391
ENSG00000158417.6	EIF5B	-0.215351	0.00126525
ENSG00000006744.14	ELAC2	-0.249067	6.7159e-08
ENSG00000120690.9	ELF1	-0.104518	0.0155641
ENSG00000102034.12	ELF4	-0.481116	1.04955e-06
ENSG00000179387.5	ELMOD2	0.241658	0.00462902
ENSG00000170522.5	ELOVL6	0.618222	5.00229e-15
ENSG00000134759.9	ELP2	-0.147378	0.00726341
ENSG00000163832.11	ELP6	0.142361	0.0293566
ENSG00000170571.7	EMB	-0.414445	6.48569e-21
ENSG00000127463.9	EMC1	-0.425129	1.26835e-24
ENSG00000161671.12	EMC10	-0.465791	5.07182e-11
ENSG00000100908.9	EMC9	0.217765	0.0409521
ENSG00000138080.9	EMILIN1	0.515964	0.0422531
ENSG00000143924.14	EML4	-0.184438	0.00086087
ENSG00000165521.11	EML5	-0.371745	3.06144e-08
ENSG00000214595.7	EML6	0.323361	8.88088e-15
ENSG00000154380.12	ENAH	-3.082	0
ENSG00000132464.7	ENAM	0.232981	0.0017534
ENSG00000171617.9	ENC1	-0.295478	0.0106482
ENSG00000149218.4	ENDOD1	-0.282668	1.20158e-05
ENSG00000167136.6	ENDOG	-0.259365	0.0395723
ENSG00000173818.12	ENDOV	0.554395	0.00179034
ENSG00000108515.13	ENO3	-0.492338	0.00846069
ENSG00000112796.5	ENPP5	-0.779626	0.000211146
ENSG00000143420.13	ENSA	0.0858794	0.0405916
ENSG00000138185.12	ENTPD1	0.630162	4.74367e-17
ENSG00000197217.8	ENTPD4	0.190003	1.63274e-05
ENSG00000197586.8	ENTPD6	0.145044	0.0185088
ENSG00000120533.8	ENY2	0.114098	0.0443038
ENSG00000163378.9	EOGT	-0.9675	0.00520455
ENSG00000100393.9	EP300	0.256737	0.00179696
ENSG00000185684.8	EP400NL	0.211177	0.0439174
ENSG00000159023.14	EPB41	-0.12696	0.000516212
ENSG00000115109.9	EPB41L5	-2.41374	8.10977e-39
ENSG00000120616.11	EPC1	0.2017	0.00605832
ENSG00000143819.8	EPHX1	-1.05759	0.0496124
ENSG00000178567.5	EPM2AIP1	-0.223217	0.000738063
ENSG00000072134.11	EPN2	-0.276698	0.00239675
ENSG00000187266.9	EPOR	-0.379127	0.0174425
ENSG00000136628.13	EPRS	-0.156344	0.00198678
ENSG00000177106.10	EPS8L2	-3.01514	2.18821e-86
ENSG00000133106.10	EPSTI1	2.35452	0.0024778
ENSG00000138018.13	EPT1	-0.120166	0.00611029
ENSG00000164307.8	ERAP1	0.297981	2.9095e-08
ENSG00000141736.9	ERBB2	0.517886	0.00727324
ENSG00000112851.10	ERBB2IP	0.130957	0.0175216
ENSG00000082805.15	ERC1	0.354493	5.26367e-09
ENSG00000012061.11	ERCC1	0.231793	0.00278404
ENSG00000104884.10	ERCC2	0.278649	0.000501012
ENSG00000175595.10	ERCC4	0.232866	0.0269894
ENSG00000113719.11	ERGIC1	-0.194827	0.000164535
ENSG00000087502.13	ERGIC2	-0.258002	6.0159e-05
ENSG00000117419.10	ERI3	-0.176314	0.0187567
ENSG00000178607.11	ERN1	1.16605	8.07874e-38
ENSG00000086619.9	ERO1LB	-0.497305	3.62464e-13
ENSG00000023318.7	ERP44	0.154869	0.00261273
ENSG00000141446.6	ESCO1	-0.417193	1.25459e-12
ENSG00000089048.10	ESF1	-0.478865	6.94681e-11
ENSG00000091831.17	ESR1	-0.181732	0.0074676
ENSG00000158220.9	ESYT3	1.12599	5.42123e-07
ENSG00000120705.8	ETF1	-0.287418	2.3577e-13
ENSG00000140374.11	ETFA	-0.149958	0.00693535
ENSG00000173040.8	EVC2	3.64534	6.37319e-31
ENSG00000126860.7	EVI2A	-0.230945	0.0401888
ENSG00000196405.8	EVL	-0.313543	7.16817e-07
ENSG00000112685.9	EXOC2	-0.307383	1.35432e-06
ENSG00000138190.12	EXOC6	0.322232	8.84949e-05
ENSG00000178896.6	EXOSC4	0.454141	3.4758e-09
ENSG00000077348.4	EXOSC5	-0.430872	2.30559e-09
ENSG00000123737.8	EXOSC9	-0.155161	0.00517086
ENSG00000012232.4	EXTL3	0.373494	2.01886e-08
ENSG00000108799.8	EZH1	0.269313	6.595e-05
ENSG00000106462.6	EZH2	0.187681	3.04328e-07
ENSG00000092820.13	EZR	0.247987	8.13345e-13
ENSG00000158769.13	F11R	-0.457426	0.000133116
ENSG00000131187.5	F12	-1.25073	0.00547704
ENSG00000134824.9	FADS2	0.236217	3.42147e-05
ENSG00000221968.4	FADS3	-0.549221	6.70717e-16
ENSG00000185104.15	FAF1	-0.113484	0.0210653
ENSG00000115042.5	FAHD2A	0.20431	0.0209678
ENSG00000158234.8	FAIM	0.636839	3.62926e-30
ENSG00000162894.7	FAIM3	-3.61054	0.021139
ENSG00000167106.7	FAM102A	0.171767	0.026813
ENSG00000166801.11	FAM111A	0.491647	9.91684e-25
ENSG00000121104.3	FAM117A	0.330555	2.7121e-05
ENSG00000100376.7	FAM118A	0.306223	2.18834e-06
ENSG00000048828.12	FAM120A	-0.141545	0.00481786
ENSG00000150510.11	FAM124A	-3.13158	0.0191059
ENSG00000122591.7	FAM126A	0.129823	0.0107279
ENSG00000167483.13	FAM129C	0.184561	0.000210775
ENSG00000178752.11	FAM132B	-1.8172	0.0071463
ENSG00000035141.3	FAM136A	-0.132786	0.0315018
ENSG00000170074.15	FAM153A	-0.991298	9.65351e-05
ENSG00000204677.6	FAM153C	-0.658783	0.00108185
ENSG00000182646.12	FAM156A	-0.280839	8.63385e-05
ENSG00000179304.12	FAM156B	-0.280881	4.51016e-05
ENSG00000196990.4	FAM163B	-0.361039	0.0242057
ENSG00000154319.10	FAM167A	0.1202	0.0233746
ENSG00000163322.9	FAM175A	0.896961	2.72188e-34
ENSG00000222011.4	FAM185A	-0.316878	0.000579928
ENSG00000160767.16	FAM189B	0.470699	0.00857067
ENSG00000172775.12	FAM192A	0.156742	0.00111958
ENSG00000125386.10	FAM193A	0.174054	0.045936
ENSG00000164125.11	FAM198B	-0.740476	7.22428e-30
ENSG00000235173.2	FAM203A	0.341214	5.13163e-11
ENSG00000230567.3	FAM203B	0.337887	2.48573e-10
ENSG00000163946.9	FAM208A	0.112208	0.0359779
ENSG00000108021.15	FAM208B	-0.471851	1.34195e-32
ENSG00000116199.7	FAM20B	0.19965	0.00116204
ENSG00000177150.8	FAM210A	-0.282819	4.03106e-06
ENSG00000185614.4	FAM212A	-1.42666	1.27275e-07
ENSG00000197852.8	FAM212B	0.376897	2.26594e-06
ENSG00000122378.9	FAM213A	-5.83168	4.35285e-05
ENSG00000204856.7	FAM216A	0.177364	0.00301107
ENSG00000178761.10	FAM219B	0.303002	0.000195778
ENSG00000122376.7	FAM35A	-0.19751	0.00240216
ENSG00000196937.6	FAM3C	-0.195366	0.00298038
ENSG00000119979.11	FAM45A	0.33303	5.94546e-07
ENSG00000153310.14	FAM49B	-0.157305	0.0136829
ENSG00000071859.10	FAM50A	0.258132	0.0139428
ENSG00000174137.8	FAM53A	0.51328	0.00169001
ENSG00000189319.9	FAM53B	-0.111513	0.0170048
ENSG00000111913.11	FAM65B	0.558018	2.62273e-05
ENSG00000042062.7	FAM65C	-2.1137	3.32692e-17
ENSG00000126882.8	FAM78A	-0.254241	1.85168e-08
ENSG00000157470.7	FAM81A	0.144556	0.0030444
ENSG00000101447.9	FAM83D	-0.158039	0.0301566
ENSG00000180921.6	FAM83H	-0.716646	0.000585004
ENSG00000168672.3	FAM84B	-2.68995	2.28561e-35
ENSG00000182118.5	FAM89A	-1.37004	1.88862e-29
ENSG00000153789.8	FAM92B	-0.19817	0.0169163
ENSG00000119812.14	FAM98A	-0.153725	0.00608804
ENSG00000198690.5	FAN1	-1.63737	1.21417e-58
ENSG00000187741.10	FANCA	0.236836	2.52317e-05
ENSG00000158169.7	FANCC	0.318856	0.00159582
ENSG00000144554.6	FANCD2	0.58337	1.11481e-46
ENSG00000183161.3	FANCF	-0.805599	5.78817e-18
ENSG00000221829.5	FANCG	0.159482	0.0270501
ENSG00000197601.8	FAR1	-0.142189	0.0171041
ENSG00000064763.6	FAR2	-0.393686	0.019436
ENSG00000006607.9	FARP2	0.374266	4.18459e-25
ENSG00000145982.7	FARS2	-0.188388	0.0354606
ENSG00000179115.6	FARSA	-0.184684	6.17829e-06
ENSG00000116120.8	FARSB	-0.464982	7.51088e-29
ENSG00000169710.6	FASN	0.354026	0.000301234
ENSG00000138399.13	FASTKD1	-0.18083	0.00926409
ENSG00000118246.9	FASTKD2	0.535657	1.11537e-16
ENSG00000124279.7	FASTKD3	-0.224094	0.00842866
ENSG00000105202.3	FBL	-0.286307	9.27953e-08
ENSG00000171823.6	FBXL14	-0.230799	0.000114689
ENSG00000099364.12	FBXL19	-0.193765	0.00263334
ENSG00000118496.4	FBXO30	-0.167363	0.0134293
ENSG00000151876.8	FBXO4	-0.65075	1.52169e-05
ENSG00000132879.9	FBXO44	-0.36331	0.0259566
ENSG00000174013.7	FBXO45	-0.12362	0.0335643
ENSG00000112029.5	FBXO5	0.210138	0.000923286
ENSG00000174989.8	FBXW8	0.285064	0.00134664
ENSG00000132004.8	FBXW9	-0.309549	0.00959596
ENSG00000197948.6	FCHSD1	0.355761	1.73209e-05
ENSG00000143297.14	FCRL5	-1.49952	0.00378138
ENSG00000132185.12	FCRLA	0.328673	9.20751e-26
ENSG00000079459.8	FDFT1	0.120047	0.00725686
ENSG00000160752.10	FDPS	0.600396	2.32747e-33
ENSG00000161513.7	FDXR	0.249345	0.0386307
ENSG00000151422.8	FER	0.367392	0.00500352
ENSG00000149781.8	FERMT3	-1.13097	4.53287e-97
ENSG00000146192.10	FGD2	2.25046	1.92757e-79
ENSG00000139132.10	FGD4	0.29278	8.24598e-05
ENSG00000180263.9	FGD6	0.607639	7.14026e-27
ENSG00000114279.9	FGF12	-1.11757	1.99661e-14
ENSG00000077782.15	FGFR1	-2.16097	1.88275e-76
ENSG00000111790.9	FGFR1OP2	-0.141513	0.0421069
ENSG00000000938.8	FGR	-1.68675	1.54477e-49
ENSG00000091483.6	FH	-0.215251	2.91545e-05
ENSG00000112214.6	FHL5	1.11345	0.00723075
ENSG00000134775.11	FHOD3	-0.809886	0.003028
ENSG00000168386.14	FILIP1L	-0.49522	0.0309613
ENSG00000145216.11	FIP1L1	-0.135021	0.00918785
ENSG00000134285.6	FKBP11	0.314301	5.19906e-07
ENSG00000119321.4	FKBP15	-0.149758	0.0109603
ENSG00000173486.8	FKBP2	0.143612	0.0466026
ENSG00000100442.6	FKBP3	0.183073	0.0353466
ENSG00000004478.5	FKBP4	-0.155189	2.06765e-05
ENSG00000181027.6	FKRP	0.254782	0.00478197
ENSG00000160688.14	FLAD1	-0.316305	2.25774e-09
ENSG00000197182.8	FLJ27365	1.12756	0.000599334
ENSG00000196924.10	FLNA	-0.225667	2.2967e-09
ENSG00000137312.10	FLOT1	0.184066	0.00111397
ENSG00000122025.10	FLT3	-2.64942	2.35648e-08
ENSG00000161791.9	FMNL3	-0.705041	9.56073e-28
ENSG00000131781.8	FMO5	-2.27974	7.61532e-16
ENSG00000187239.12	FNBP1	0.202956	5.44777e-09
ENSG00000164694.12	FNDC1	5.19527	1.33339e-05
ENSG00000102531.12	FNDC3A	0.434101	4.36654e-26
ENSG00000217128.7	FNIP1	-0.213975	0.00688261
ENSG00000188352.8	FOCAD	-0.40071	4.62552e-13
ENSG00000187559.4	FOXD4L3	-0.730155	0.040366
ENSG00000065970.4	FOXJ2	-2.56659	1.04823e-05
ENSG00000111206.8	FOXM1	0.251101	0.00400798
ENSG00000053254.11	FOXN3	0.362203	2.25148e-14
ENSG00000139445.13	FOXN4	0.675716	0.0303831
ENSG00000150907.6	FOXO1	0.24084	8.50249e-05
ENSG00000118689.10	FOXO3	0.30568	0.00630005
ENSG00000114861.14	FOXP1	0.159001	0.000216831
ENSG00000136877.10	FPGS	0.123845	0.0383068
ENSG00000111816.6	FRK	0.853995	0.000229299
ENSG00000139926.11	FRMD6	-3.87281	1.7786e-05
ENSG00000126391.9	FRMD8	0.200436	0.00525911
ENSG00000156869.8	FRRS1	0.413692	0.000952658
ENSG00000166225.4	FRS2	0.269973	0.0256343
ENSG00000075539.9	FRYL	0.124076	0.00758823
ENSG00000075618.13	FSCN1	-1.97804	0.0425715
ENSG00000105255.6	FSD1	0.349983	0.041781
ENSG00000186628.8	FSD2	0.84442	8.91047e-09
ENSG00000134363.7	FST	-1.258	0.0283771
ENSG00000087086.9	FTL	-0.130256	0.0203415
ENSG00000140718.14	FTO	-0.333147	0.000555438
ENSG00000068438.10	FTSJ1	-0.162413	0.0109862
ENSG00000108592.12	FTSJ3	-0.290289	1.3086e-13
ENSG00000165775.13	FUNDC2	0.262555	0.00042908
ENSG00000140564.6	FURIN	-1.55624	0.0216598
ENSG00000174951.6	FUT1	-0.364638	0.0233009
ENSG00000172728.11	FUT10	0.292633	0.00300779
ENSG00000196968.6	FUT11	-0.216725	0.000125097
ENSG00000033170.12	FUT8	-0.1849	5.72717e-05
ENSG00000089327.10	FXYD5	-0.236204	0.0105724
ENSG00000010810.13	FYN	0.134767	0.0482174
ENSG00000122068.8	FYTTD1	-0.214334	5.00778e-05
ENSG00000157240.2	FZD1	-1.57613	0.00134664
ENSG00000163251.3	FZD5	0.49779	0.0124047
ENSG00000145907.10	G3BP1	-0.158549	0.000677238
ENSG00000138757.10	G3BP2	-0.105516	0.0356113
ENSG00000131482.5	G6PC	-1.61671	2.40952e-06
ENSG00000109458.4	GAB1	-0.284789	9.86505e-06
ENSG00000139112.6	GABARAPL1	-0.642472	5.13655e-16
ENSG00000204681.6	GABBR1	1.41543	0.00687442
ENSG00000104064.12	GABPB1	0.206675	0.000967885
ENSG00000143458.7	GABPB2	0.279392	0.00326932
ENSG00000145864.8	GABRB2	-0.185867	0.00329913
ENSG00000179271.1	GADD45GIP1	-0.261413	0.000194211
ENSG00000054983.12	GALC	0.609517	8.08133e-07
ENSG00000141012.8	GALNS	0.381743	0.000547334
ENSG00000164574.11	GALNT10	0.627706	1.02813e-19
ENSG00000143641.8	GALNT2	0.354578	7.57692e-20
ENSG00000139629.11	GALNT6	0.788251	3.14216e-16
ENSG00000130005.7	GAMT	-0.252904	0.000677238
ENSG00000109534.12	GAR1	-0.264274	0.0113071
ENSG00000141441.11	GAREM	0.401387	3.31031e-08
ENSG00000157833.8	GAREML	-0.687447	0.0413084
ENSG00000136895.14	GARNL3	-0.36629	0.000205386
ENSG00000139354.6	GAS2L3	-1.46517	1.18429e-10
ENSG00000183087.10	GAS6	-1.00742	0.000313207
ENSG00000157259.6	GATAD1	0.292161	5.25648e-05
ENSG00000143614.7	GATAD2B	0.176815	0.0417551
ENSG00000177628.11	GBA	0.224765	0.0142584
ENSG00000070610.10	GBA2	0.202339	0.000354425
ENSG00000114480.8	GBE1	-0.71286	4.56479e-19
ENSG00000148288.7	GBGT1	-3.5428	4.31868e-09
ENSG00000115271.6	GCA	-0.336591	7.64845e-05
ENSG00000100116.12	GCAT	-0.272197	0.0054676
ENSG00000179562.2	GCC1	0.156478	0.0228457
ENSG00000135968.15	GCC2	-0.19899	0.00439028
ENSG00000131979.14	GCH1	-0.211235	0.00032913
ENSG00000137880.4	GCHFR	0.166736	0.0283484
ENSG00000187210.8	GCNT1	-0.222485	0.000445531
ENSG00000174500.8	GCSAM	0.22845	9.53694e-06
ENSG00000104381.8	GDAP1	-0.274686	0.000744611
ENSG00000203879.7	GDI1	0.218454	0.000382634
ENSG00000082516.8	GEMIN5	-0.153017	0.000205806
ENSG00000178295.10	GEN1	0.211136	5.23369e-05
ENSG00000162676.7	GFI1	-4.62533	4.83729e-26
ENSG00000168827.10	GFM1	-0.312027	4.36205e-12
ENSG00000164347.13	GFM2	-0.200681	0.00524607
ENSG00000145990.6	GFOD1	0.116696	0.00590747
ENSG00000103365.11	GGA2	-0.100261	0.0130828
ENSG00000165678.15	GHITM	-0.112789	0.0362186
ENSG00000106560.6	GIMAP2	2.71465	9.95746e-31
ENSG00000133561.11	GIMAP6	1.76993	8.27439e-09
ENSG00000055211.8	GINM1	0.334441	1.00756e-08
ENSG00000131153.4	GINS2	-0.100782	0.0209696
ENSG00000181938.9	GINS3	-0.738053	3.29454e-17
ENSG00000123159.11	GIPC1	-0.239182	0.0292647
ENSG00000010310.4	GIPR	-0.310505	0.0487328
ENSG00000108262.11	GIT1	-0.329088	1.52551e-07
ENSG00000139436.16	GIT2	-0.149779	0.0123207
ENSG00000182963.5	GJC1	0.221781	0.000193166
ENSG00000106415.8	GLCCI1	0.288016	8.35141e-06
ENSG00000119392.10	GLE1	-0.264264	2.3054e-06
ENSG00000174842.12	GLMN	-0.30523	0.000139279
ENSG00000023572.4	GLRX2	0.442125	3.44064e-06
ENSG00000108010.7	GLRX3	-0.232579	1.53442e-05
ENSG00000135423.8	GLS2	-1.26352	2.26631e-25
ENSG00000139433.5	GLTP	-0.253456	0.000348242
ENSG00000112624.8	GLTSCR1L	0.234336	0.00184524
ENSG00000196743.4	GM2A	-0.167088	1.16726e-05
ENSG00000087338.4	GMCL1	-0.186187	0.00942789
ENSG00000112699.6	GMDS	-0.351597	0.00020551
ENSG00000162419.8	GMEB1	0.170681	0.0211272
ENSG00000101216.6	GMEB2	0.30131	0.000377289
ENSG00000197045.8	GMFB	-0.222203	0.000483453
ENSG00000130755.8	GMFG	-0.73301	4.04593e-53
ENSG00000144591.13	GMPPA	0.390769	9.28687e-10
ENSG00000163655.11	GMPS	-0.111898	0.00295303
ENSG00000087460.19	GNAS	0.319441	2.66986e-09
ENSG00000128266.7	GNAZ	-1.36864	4.81776e-53
ENSG00000078369.13	GNB1	0.282673	4.4706e-08
ENSG00000185838.9	GNB1L	-0.633826	2.39538e-07
ENSG00000114450.5	GNB4	0.396188	1.74165e-19
ENSG00000159921.10	GNE	0.538166	2.77854e-24
ENSG00000134697.8	GNL2	-0.197355	1.18837e-06
ENSG00000163938.12	GNL3	-0.112546	0.0248405
ENSG00000113552.11	GNPDA1	-2.81738	3.046e-181
ENSG00000100522.4	GNPNAT1	-0.182084	0.0202387
ENSG00000111670.10	GNPTAB	0.295789	4.05782e-12
ENSG00000090615.8	GOLGA3	-0.0897066	0.0376987
ENSG00000135052.12	GOLM1	-0.432365	0.019605
ENSG00000047932.9	GOPC	-0.138899	0.0176933
ENSG00000125166.8	GOT2	-0.096216	0.0301307
ENSG00000197858.6	GPAA1	0.372335	9.52596e-08
ENSG00000160818.12	GPATCH4	-0.265263	0.000210724
ENSG00000063660.4	GPC1	0.821074	0.044774
ENSG00000125772.8	GPCPD1	0.281602	4.62805e-09
ENSG00000152642.6	GPD1L	-0.134725	0.024865
ENSG00000115159.11	GPD2	1.40318	1.68743e-197
ENSG00000164850.10	GPER1	0.829756	7.14815e-42
ENSG00000105220.10	GPI	-0.12734	0.00355545
ENSG00000150625.12	GPM6A	1.49316	6.4301e-35
ENSG00000142751.10	GPN2	-0.206781	0.00185298
ENSG00000148358.15	GPR107	-0.259909	5.4953e-07
ENSG00000125734.9	GPR108	0.339487	0.000900414
ENSG00000164849.7	GPR146	-0.567752	0.00937587
ENSG00000154165.3	GPR15	-1.7661	0.0473382
ENSG00000175514.2	GPR152	-2.46415	0.00365021
ENSG00000158292.6	GPR153	-2.61239	0.0202154
ENSG00000180758.10	GPR157	-0.681731	0.000510692
ENSG00000173890.12	GPR160	0.420079	1.05312e-19
ENSG00000147138.1	GPR174	0.830774	0.00927945
ENSG00000125245.8	GPR18	-0.927351	3.92298e-37
ENSG00000169508.6	GPR183	-0.371552	0.0330793
ENSG00000183150.3	GPR19	-1.71036	0.00110152
ENSG00000120436.3	GPR31	-4.18642	0.00701334
ENSG00000112218.7	GPR63	0.61756	3.48916e-07
ENSG00000140030.4	GPR65	0.46688	0.000987328
ENSG00000164604.8	GPR85	1.14206	0.0170977
ENSG00000117262.14	GPR89A	-0.165666	0.00428324
ENSG00000188092.10	GPR89B	-0.178491	0.00222275
ENSG00000196644.8	GPR89C	-0.244545	0.000205806
ENSG00000185477.4	GPRIN3	-2.40386	8.92495e-68
ENSG00000121957.8	GPSM2	0.250845	4.64698e-05
ENSG00000166123.9	GPT2	0.148444	0.00404066
ENSG00000233276.2	GPX1	-0.342005	3.5283e-09
ENSG00000167468.12	GPX4	-0.104642	0.0456533
ENSG00000075240.12	GRAMD4	-0.151562	0.0174056
ENSG00000154016.9	GRAP	0.180004	0.0434655
ENSG00000177885.9	GRB2	0.119953	0.00160525
ENSG00000141738.9	GRB7	-2.84834	3.11211e-06
ENSG00000196208.9	GREB1	1.11721	9.11151e-06
ENSG00000116032.5	GRIN3B	0.654259	0.0141266
ENSG00000178719.12	GRINA	-0.402025	0.0320129
ENSG00000155974.7	GRIP1	0.855846	0.0384177
ENSG00000198055.6	GRK6	-0.571307	3.04035e-29
ENSG00000030582.12	GRN	0.190055	0.0145217
ENSG00000109519.8	GRPEL1	-0.17273	0.000988504
ENSG00000164284.10	GRPEL2	-0.168759	0.0116388
ENSG00000105447.8	GRWD1	-0.222892	5.719e-07
ENSG00000167914.6	GSDMA	-2.89852	2.13693e-07
ENSG00000131149.13	GSE1	-0.329706	1.62674e-08
ENSG00000177602.4	GSG2	0.423448	2.12164e-08
ENSG00000148180.12	GSN	-1.00688	5.00286e-09
ENSG00000103342.8	GSPT1	-0.228786	4.31171e-10
ENSG00000084207.11	GSTP1	-0.073856	0.0363472
ENSG00000100577.14	GSTZ1	0.176988	0.0275741
ENSG00000165417.7	GTF2A1	0.403301	4.35229e-13
ENSG00000188342.7	GTF2F2	-0.145035	0.0499755
ENSG00000110768.7	GTF2H1	-0.210077	5.53676e-05
ENSG00000111358.9	GTF2H3	-0.339362	5.72767e-07
ENSG00000272047.1	GTF2H5	-0.274494	0.00423719
ENSG00000115207.9	GTF3C2	0.151784	0.0122401
ENSG00000119041.6	GTF3C3	-0.83508	1.93208e-61
ENSG00000148308.13	GTF3C5	0.162306	0.00173575
ENSG00000100226.11	GTPBP1	0.258613	2.20445e-06
ENSG00000105793.11	GTPBP10	-0.226269	0.0006347
ENSG00000107937.14	GTPBP4	-0.398961	2.15394e-25
ENSG00000075218.14	GTSE1	0.185746	0.00825096
ENSG00000138867.12	GUCD1	0.11939	0.00392016
ENSG00000164116.12	GUCY1A3	8.43143	7.08005e-15
ENSG00000151806.9	GUF1	-0.159629	0.00257684
ENSG00000169919.12	GUSB	0.262041	0.000172097
ENSG00000165905.12	GYLTL1B	-1.9217	2.14501e-11
ENSG00000136732.10	GYPC	-6.02818	1.25781e-07
ENSG00000104812.10	GYS1	-0.150232	0.048881
ENSG00000125812.11	GZF1	-0.241427	7.88972e-06
ENSG00000189060.4	H1F0	-3.25596	0.0038199
ENSG00000184897.4	H1FX	0.232003	0.00457632
ENSG00000105968.14	H2AFV	0.15856	0.000444552
ENSG00000113648.12	H2AFY	-0.135146	0.000423141
ENSG00000049239.8	H6PD	0.24996	0.00190796
ENSG00000131351.10	HAUS8	0.237792	0.000158154
ENSG00000113070.6	HBEGF	1.15643	1.01967e-109
ENSG00000126264.5	HCST	-1.65934	3.95758e-12
ENSG00000116478.7	HDAC1	-0.122524	0.00270899
ENSG00000068024.12	HDAC4	0.235758	0.0465329
ENSG00000108840.11	HDAC5	0.232538	0.00136242
ENSG00000094631.14	HDAC6	0.350405	9.18931e-09
ENSG00000115677.12	HDLBP	-0.142478	5.28618e-07
ENSG00000119285.6	HEATR1	-0.40832	9.12448e-24
ENSG00000155393.8	HEATR3	-0.220051	0.000348809
ENSG00000068097.10	HEATR6	-3.0476	5.99507e-10
ENSG00000051620.6	HEBP2	0.432829	6.67172e-06
ENSG00000126107.10	HECTD3	0.239048	0.0254092
ENSG00000173706.8	HEG1	4.52551	3.43348e-11
ENSG00000163312.6	HELQ	0.630929	2.84608e-33
ENSG00000198265.7	HELZ	-0.120685	0.02021
ENSG00000130589.12	HELZ2	0.792026	1.15814e-16
ENSG00000136929.8	HEMGN	-1.19242	0.00108418
ENSG00000103657.9	HERC1	0.205849	3.29842e-10
ENSG00000138641.11	HERC3	0.185945	0.0429004
ENSG00000051108.10	HERPUD1	0.370945	6.18513e-15
ENSG00000114315.3	HES1	-1.68683	9.78548e-06
ENSG00000144485.6	HES6	0.475013	0.0114252
ENSG00000049860.9	HEXB	0.741376	0.00852869
ENSG00000185359.8	HGS	0.47283	6.41219e-22
ENSG00000165102.10	HGSNAT	-0.28609	0.000584146
ENSG00000054392.8	HHAT	-1.15016	2.77058e-12
ENSG00000156875.9	HIAT1	0.134739	0.0228726
ENSG00000148110.11	HIATL1	-0.121031	0.00589817
ENSG00000167861.11	HID1	1.11872	0.000114036
ENSG00000181061.9	HIGD1A	-0.198343	0.000516676
ENSG00000130787.9	HIP1R	-0.189325	0.00136862
ENSG00000184357.3	HIST1H1B	0.450231	5.37047e-36
ENSG00000187837.2	HIST1H1C	0.500256	3.17865e-37
ENSG00000124575.5	HIST1H1D	0.455949	1.9079e-21
ENSG00000168298.4	HIST1H1E	0.466054	1.23581e-10
ENSG00000137259.2	HIST1H2AB	0.780983	1.15064e-40
ENSG00000180573.8	HIST1H2AC	0.52058	4.58358e-50
ENSG00000168274.3	HIST1H2AE	0.61591	4.75221e-53
ENSG00000196787.2	HIST1H2AG	0.388365	4.42786e-22
ENSG00000184825.4	HIST1H2AH	0.386689	3.07918e-19
ENSG00000196747.3	HIST1H2AI	0.463708	1.50122e-29
ENSG00000182611.3	HIST1H2AJ	0.380829	1.61424e-15
ENSG00000184348.2	HIST1H2AK	0.42776	7.36064e-19
ENSG00000198374.3	HIST1H2AL	0.351052	4.08199e-05
ENSG00000180596.7	HIST1H2BC	0.546027	1.15505e-66
ENSG00000158373.7	HIST1H2BD	0.440419	3.23765e-18
ENSG00000197846.3	HIST1H2BF	0.663694	1.25617e-17
ENSG00000187990.4	HIST1H2BG	0.402359	1.38181e-19
ENSG00000124635.7	HIST1H2BJ	0.216638	2.54525e-06
ENSG00000197903.6	HIST1H2BK	0.372596	6.75057e-05
ENSG00000185130.4	HIST1H2BL	0.543948	7.5644e-30
ENSG00000233822.3	HIST1H2BN	0.414979	8.59517e-10
ENSG00000196331.5	HIST1H2BO	0.348255	2.27383e-20
ENSG00000198366.5	HIST1H3A	0.227254	5.75416e-06
ENSG00000124693.2	HIST1H3B	0.562678	8.07874e-38
ENSG00000197409.6	HIST1H3D	0.618903	4.44381e-52
ENSG00000203813.4	HIST1H3H	0.482833	4.396e-25
ENSG00000182572.2	HIST1H3I	0.296214	0.00309012
ENSG00000197153.3	HIST1H3J	0.472813	6.35458e-30
ENSG00000196176.7	HIST1H4A	0.447968	3.91961e-13
ENSG00000124529.3	HIST1H4B	0.318642	1.12214e-07
ENSG00000197061.3	HIST1H4C	0.316593	1.35625e-08
ENSG00000188987.2	HIST1H4D	0.444929	3.42074e-16
ENSG00000198518.5	HIST1H4E	0.585708	3.00569e-28
ENSG00000158406.2	HIST1H4H	0.472076	2.31778e-17
ENSG00000198339.3	HIST1H4I	0.1455	0.0270501
ENSG00000197238.3	HIST1H4J	0.421887	1.85943e-09
ENSG00000197914.2	HIST1H4K	0.411428	2.95586e-14
ENSG00000198558.2	HIST1H4L	-2.47041	2.03812e-275
ENSG00000183558.5	HIST2H2AA3	0.444585	4.32022e-20
ENSG00000203812.2	HIST2H2AA4	0.428887	2.46234e-18
ENSG00000184270.3	HIST2H2AB	0.791314	5.88445e-44
ENSG00000184260.4	HIST2H2AC	0.759596	1.35216e-63
ENSG00000184678.8	HIST2H2BE	0.859667	3.55324e-16
ENSG00000203814.5	HIST2H2BF	-0.890731	1.07278e-27
ENSG00000203852.3	HIST2H3A	0.43761	9.16551e-31
ENSG00000203811.1	HIST2H3C	0.437178	4.69127e-29
ENSG00000183598.3	HIST2H3D	-0.440147	5.04704e-06
ENSG00000183941.8	HIST2H4A	0.466254	3.43573e-11
ENSG00000182217.7	HIST2H4B	0.466794	3.33468e-11
ENSG00000181218.4	HIST3H2A	0.77624	2.799e-69
ENSG00000196890.3	HIST3H2BB	0.914385	3.23207e-78
ENSG00000010818.4	HIVEP2	-0.319456	8.56863e-10
ENSG00000156515.17	HK1	-0.424184	3.66206e-22
ENSG00000181666.13	HKR1	0.437538	2.77766e-07
ENSG00000206503.7	HLA-A	-0.412352	3.35406e-15
ENSG00000234745.5	HLA-B	0.337714	1.31545e-06
ENSG00000204257.10	HLA-DMA	0.409011	2.27472e-08
ENSG00000204252.8	HLA-DOA	0.422573	4.66149e-17
ENSG00000231389.3	HLA-DPA1	0.556213	1.38314e-43
ENSG00000223865.6	HLA-DPB1	0.74012	2.51653e-22
ENSG00000204287.9	HLA-DRA	0.580306	2.42578e-52
ENSG00000204592.5	HLA-E	0.410519	1.73679e-12
ENSG00000204642.9	HLA-F	2.42619	1.54632e-08
ENSG00000071794.11	HLTF	-0.204689	0.00110858
ENSG00000101294.12	HM13	0.138945	0.0372894
ENSG00000183624.9	HMCES	-0.127299	0.00265713
ENSG00000143341.7	HMCN1	-4.42007	1.85733e-13
ENSG00000140382.10	HMG20A	-0.158629	0.0185011
ENSG00000189403.10	HMGB1	0.150885	0.0119476
ENSG00000164104.7	HMGB2	0.0836882	0.0192607
ENSG00000113161.11	HMGCR	0.548708	3.40708e-41
ENSG00000112972.10	HMGCS1	0.87743	3.7786e-86
ENSG00000198830.6	HMGN2	0.0842588	0.0231727
ENSG00000182952.4	HMGN4	-0.227596	0.000336076
ENSG00000198157.6	HMGN5	0.665205	0.00524607
ENSG00000113716.8	HMGXB3	-0.13567	0.00641336
ENSG00000100281.9	HMGXB4	0.199409	0.0147084
ENSG00000180448.6	HMHA1	-0.237909	9.99639e-07
ENSG00000103415.7	HMOX2	-0.234963	0.00023098
ENSG00000188816.3	HMX2	-5.81509	3.04426e-05
ENSG00000139675.10	HNRNPA1L2	0.139245	0.0196786
ENSG00000092199.13	HNRNPC	-0.0923273	0.0452531
ENSG00000169813.12	HNRNPF	-0.112151	0.0140061
ENSG00000126945.8	HNRNPH2	-0.185298	0.00907294
ENSG00000105323.12	HNRNPUL1	0.169095	0.000215758
ENSG00000103942.8	HOMER2	0.929983	0.0231203
ENSG00000123388.4	HOXC11	-2.54579	0.00503695
ENSG00000115756.8	HPCAL1	-0.617515	8.10671e-09
ENSG00000186603.4	HPDL	-2.35855	3.57947e-15
ENSG00000100099.16	HPS4	0.373234	2.41096e-35
ENSG00000110756.13	HPS5	-0.140313	0.0406157
ENSG00000135116.5	HRK	-0.828829	4.06894e-22
ENSG00000136720.6	HS6ST1	-0.438225	1.8124e-13
ENSG00000198189.6	HSD17B11	-4.86659	8.93302e-24
ENSG00000149084.7	HSD17B12	0.291024	1.46499e-10
ENSG00000025423.7	HSD17B6	0.488902	0.0150528
ENSG00000132196.9	HSD17B7	0.456869	5.1937e-14
ENSG00000204228.3	HSD17B8	0.318575	0.00109918
ENSG00000103160.7	HSDL1	-0.181945	0.0190998
ENSG00000196684.8	HSH2D	-0.187773	0.00591955
ENSG00000096384.15	HSP90AB1	-0.134379	0.0100772
ENSG00000166598.8	HSP90B1	0.537747	8.21376e-28
ENSG00000155304.4	HSPA13	0.220267	0.00389161
ENSG00000204388.5	HSPA1B	0.50099	9.65036e-15
ENSG00000170606.9	HSPA4	-0.128663	0.00952055
ENSG00000164070.7	HSPA4L	0.24819	0.000682181
ENSG00000113013.8	HSPA9	-0.208661	2.35648e-08
ENSG00000106211.8	HSPB1	-2.13689	4.17075e-48
ENSG00000133265.6	HSPBP1	-0.142802	0.0312182
ENSG00000142798.12	HSPG2	0.610603	7.71629e-09
ENSG00000109854.9	HTATIP2	-1.35665	3.72141e-25
ENSG00000102241.7	HTATSF1	-0.259595	1.19363e-05
ENSG00000136273.7	HUS1	0.210746	0.00271339
ENSG00000186792.11	HYAL3	-0.599851	0.00482659
ENSG00000196305.13	IARS	-0.0926243	0.0312085
ENSG00000067704.8	IARS2	-0.150261	0.00177575
ENSG00000005700.10	IBTK	-0.140246	0.0313331
ENSG00000163596.12	ICA1L	-0.713161	2.80533e-05
ENSG00000090339.4	ICAM1	0.251665	5.59185e-05
ENSG00000076662.5	ICAM3	-1.70845	2.13328e-129
ENSG00000105376.4	ICAM5	0.272386	0.0352851
ENSG00000116237.11	ICMT	0.102142	0.0122707
ENSG00000125968.7	ID1	-1.02663	2.49617e-69
ENSG00000115738.5	ID2	-1.31804	1.96297e-63
ENSG00000117318.8	ID3	-0.251201	1.09816e-09
ENSG00000172201.6	ID4	-0.325019	8.07342e-05
ENSG00000119912.11	IDE	0.131907	0.0138289
ENSG00000138413.9	IDH1	0.202287	0.000530321
ENSG00000182054.5	IDH2	-0.508602	5.82957e-10
ENSG00000166411.9	IDH3A	-0.208352	0.000945302
ENSG00000101365.16	IDH3B	-0.0977811	0.0451323
ENSG00000067064.6	IDI1	0.596116	3.51063e-31
ENSG00000160888.6	IER2	-0.392024	8.40529e-05
ENSG00000188483.6	IER5L	-0.96616	0.0299468
ENSG00000163565.14	IFI16	-0.315661	1.28921e-09
ENSG00000068079.3	IFI35	0.68531	2.98616e-06
ENSG00000142166.8	IFNAR1	0.292453	2.04786e-07
ENSG00000159110.15	IFNAR2	1.05211	6.94444e-27
ENSG00000111537.4	IFNG	-1.00468	0.00376686
ENSG00000027697.8	IFNGR1	-0.386595	9.65121e-05
ENSG00000159128.10	IFNGR2	0.275056	3.45411e-05
ENSG00000006652.9	IFRD1	0.207499	0.000112531
ENSG00000114446.4	IFT57	-0.451628	1.61966e-12
ENSG00000089289.11	IGBP1	0.175558	0.0407393
ENSG00000140443.9	IGF1R	0.476211	3.41933e-10
ENSG00000197081.8	IGF2R	0.172535	0.000647915
ENSG00000167779.3	IGFBP6	-3.98309	0.00420441
ENSG00000132465.6	IGJ	0.402836	2.90648e-07
ENSG00000140749.7	IGSF6	0.643647	0.0298284
ENSG00000162729.9	IGSF8	-0.271763	0.00247913
ENSG00000113141.11	IK	-0.165828	0.000424786
ENSG00000104365.9	IKBKB	0.182731	0.00766768
ENSG00000030419.12	IKZF2	-0.306114	0.000625568
ENSG00000110324.5	IL10RA	-0.42184	6.4869e-16
ENSG00000243646.4	IL10RB	0.294365	0.00520455
ENSG00000134470.15	IL15RA	2.02262	2.24611e-21
ENSG00000172349.12	IL16	-0.611704	3.6912e-30
ENSG00000110944.4	IL23A	-0.562562	0.0476858
ENSG00000111536.4	IL26	-1.28047	0.0479233
ENSG00000134460.11	IL2RA	-1.13817	9.873e-25
ENSG00000077238.9	IL4R	0.153413	0.000130584
ENSG00000168685.10	IL7R	-2.13427	1.03564e-36
ENSG00000145103.8	ILDR1	0.94586	0.0024678
ENSG00000143621.12	ILF2	-0.144794	0.000252141
ENSG00000129351.13	ILF3	0.111045	0.0112168
ENSG00000136718.5	IMP4	0.089695	0.0161448
ENSG00000141401.7	IMPA2	0.31344	0.00241909
ENSG00000104331.4	IMPAD1	-0.250158	4.03551e-08
ENSG00000132849.14	INADL	-2.96941	3.82316e-09
ENSG00000203485.8	INF2	-5.55648	4.58156e-33
ENSG00000139269.2	INHBE	0.610651	7.91642e-06
ENSG00000128908.11	INO80	0.144771	0.014069
ENSG00000040933.11	INPP4A	-0.285089	2.45847e-05
ENSG00000204084.8	INPP5B	-0.131003	0.00361144
ENSG00000165458.9	INPPL1	0.216132	0.000127985
ENSG00000186480.8	INSIG1	0.835747	6.77242e-108
ENSG00000171105.9	INSR	0.842097	9.5865e-108
ENSG00000108506.7	INTS2	-0.538688	4.15362e-27
ENSG00000149262.12	INTS4	-0.14278	0.0383863
ENSG00000102786.10	INTS6	-0.277561	2.46069e-08
ENSG00000086200.12	IPO11	-0.314797	2.8782e-09
ENSG00000140575.8	IQGAP1	0.138799	9.85192e-05
ENSG00000145703.11	IQGAP2	-0.387348	2.89736e-08
ENSG00000183856.6	IQGAP3	0.234848	0.000856826
ENSG00000184216.7	IRAK1	-0.14073	0.00363729
ENSG00000134070.4	IRAK2	-2.18956	2.80844e-06
ENSG00000136381.8	IREB2	-0.152101	0.034656
ENSG00000125347.9	IRF1	-0.307496	0.00241271
ENSG00000168310.6	IRF2	0.857331	9.09225e-42
ENSG00000168264.6	IRF2BP2	-0.478169	1.07013e-06
ENSG00000137265.10	IRF4	0.363862	1.55244e-25
ENSG00000128604.14	IRF5	-1.39185	1.14284e-32
ENSG00000185507.15	IRF7	0.637891	4.64348e-06
ENSG00000140968.6	IRF8	-0.315556	8.84905e-23
ENSG00000167378.4	IRGQ	-0.270203	5.69215e-06
ENSG00000169047.5	IRS1	0.148062	0.00510647
ENSG00000066583.7	ISOC1	-0.163987	0.0420225
ENSG00000063241.3	ISOC2	-0.158572	0.0038199
ENSG00000182149.16	IST1	-0.115843	0.00505705
ENSG00000240682.5	ISY1	-0.320795	0.000756451
ENSG00000078747.8	ITCH	0.167501	0.0115738
ENSG00000005884.13	ITGA3	-2.07864	1.09924e-48
ENSG00000115232.9	ITGA4	0.293121	6.47696e-11
ENSG00000083457.7	ITGAE	0.665069	4.96901e-11
ENSG00000005844.13	ITGAL	-0.903321	8.85442e-90
ENSG00000138448.7	ITGAV	-4.03452	1.42997e-23
ENSG00000139626.11	ITGB7	-0.258295	1.73709e-07
ENSG00000100605.12	ITPK1	-0.241366	0.0140192
ENSG00000143772.5	ITPKB	0.564626	9.37744e-15
ENSG00000123104.7	ITPR2	-0.148496	0.0031503
ENSG00000198885.5	ITPRIPL1	-0.268498	0.00123654
ENSG00000205726.9	ITSN1	0.187213	0.0290679
ENSG00000198399.10	ITSN2	-0.126926	0.00574805
ENSG00000128928.4	IVD	-4.06055	8.45117e-95
ENSG00000184916.4	JAG2	-0.727205	3.50882e-14
ENSG00000162434.7	JAK1	-0.193475	3.47277e-09
ENSG00000105639.14	JAK3	-0.604293	1.94207e-05
ENSG00000176049.11	JAKMIP2	0.480023	1.84031e-07
ENSG00000153814.7	JAZF1	0.256869	0.0192013
ENSG00000171988.13	JMJD1C	0.193012	9.36895e-06
ENSG00000081692.8	JMJD4	0.26177	0.00635026
ENSG00000152409.8	JMY	-1.28825	1.61516e-39
ENSG00000161677.7	JOSD2	0.430542	0.0115081
ENSG00000171223.4	JUNB	-0.35061	1.31511e-05
ENSG00000130522.4	JUND	0.201186	0.0233293
ENSG00000173801.12	JUP	0.387254	0.000699959
ENSG00000197256.6	KANK2	-0.331548	6.14814e-17
ENSG00000065427.10	KARS	-0.107533	0.0166889
ENSG00000114166.7	KAT2B	0.237803	0.0039685
ENSG00000172977.8	KAT5	0.220135	0.0240339
ENSG00000167216.12	KATNAL2	0.252705	0.000187178
ENSG00000165572.6	KBTBD6	-0.156991	0.00629825
ENSG00000163376.7	KBTBD8	-0.538311	2.9602e-19
ENSG00000169282.13	KCNAB1	0.503517	0.000316048
ENSG00000069424.10	KCNAB2	-0.446561	5.81791e-18
ENSG00000116396.9	KCNC4	-1.39123	7.79003e-15
ENSG00000055118.10	KCNH2	-1.90628	7.56476e-11
ENSG00000089558.4	KCNH4	-1.34431	0.0233234
ENSG00000182324.5	KCNJ14	0.5549	0.035487
ENSG00000123700.4	KCNJ2	-1.46658	0.0165561
ENSG00000135750.10	KCNK1	-0.584809	1.55085e-08
ENSG00000184261.4	KCNK12	0.421375	2.60466e-17
ENSG00000099337.3	KCNK6	-0.599076	0.00171763
ENSG00000171121.12	KCNMB3	1.08214	0.00292695
ENSG00000135643.4	KCNMB4	0.26243	1.61856e-06
ENSG00000143603.14	KCNN3	0.216598	4.90939e-06
ENSG00000134504.8	KCTD1	0.424682	0.00460949
ENSG00000178695.4	KCTD12	-0.647993	1.4039e-12
ENSG00000112078.9	KCTD20	-0.230652	2.44128e-06
ENSG00000136636.8	KCTD3	0.1407	0.0350519
ENSG00000243335.4	KCTD7	0.515597	1.18098e-13
ENSG00000004487.11	KDM1A	0.10231	0.0228444
ENSG00000173120.10	KDM2A	-0.156722	0.00124179
ENSG00000127663.10	KDM4B	-0.219992	7.27691e-05
ENSG00000119537.11	KDSR	-0.30568	0.0367543
ENSG00000112232.8	KHDRBS2	-0.745129	0.0363472
ENSG00000131773.9	KHDRBS3	-0.910999	0.0133292
ENSG00000100441.5	KHNYN	0.395326	8.81425e-15
ENSG00000080608.9	KIAA0020	-0.171307	0.000812803
ENSG00000235750.5	KIAA0040	0.25707	1.65556e-09
ENSG00000007202.10	KIAA0100	-0.170907	3.96424e-06
ENSG00000164961.11	KIAA0196	0.194579	0.00867201
ENSG00000145016.9	KIAA0226	0.137383	0.00386256
ENSG00000102445.14	KIAA0226L	0.323396	1.49398e-19
ENSG00000170871.7	KIAA0232	0.285639	0.00192961
ENSG00000166398.8	KIAA0355	0.25	0.00295303
ENSG00000255103.1	KIAA0754	-0.56227	0.0417876
ENSG00000121210.11	KIAA0922	0.201098	7.77858e-10
ENSG00000100364.14	KIAA0930	-0.0929694	0.0427295
ENSG00000164151.7	KIAA0947	-0.147673	0.00186682
ENSG00000136051.9	KIAA1033	-0.280456	6.38521e-07
ENSG00000138688.11	KIAA1109	-0.251283	6.48612e-07
ENSG00000164976.8	KIAA1161	-0.316977	0.0012766
ENSG00000109265.8	KIAA1211	-0.48687	0.000102597
ENSG00000116299.12	KIAA1324	1.41835	0.000719349
ENSG00000164659.10	KIAA1324L	-0.289412	2.57596e-08
ENSG00000107036.7	KIAA1432	0.37488	4.34303e-27
ENSG00000110427.10	KIAA1549L	0.233746	0.000504202
ENSG00000174718.7	KIAA1551	-0.254193	0.000112174
ENSG00000166004.10	KIAA1731	-0.227567	7.40165e-06
ENSG00000116685.11	KIAA2013	0.231113	4.44088e-07
ENSG00000138160.4	KIF11	0.131563	0.0015037
ENSG00000197892.8	KIF13B	0.226092	0.00403806
ENSG00000089177.13	KIF16B	-0.225319	0.0177282
ENSG00000116852.10	KIF21B	-0.182702	0.00421162
ENSG00000079616.8	KIF22	0.144141	2.59574e-05
ENSG00000186638.11	KIF24	0.227435	0.000931769
ENSG00000068796.12	KIF2A	-0.10781	0.0375979
ENSG00000131437.11	KIF3A	-0.14894	0.0117261
ENSG00000084731.9	KIF3C	0.321051	0.0426385
ENSG00000155980.7	KIF5A	0.601328	1.03235e-07
ENSG00000075945.8	KIFAP3	-0.47345	6.10459e-09
ENSG00000237649.3	KIFC1	0.109829	0.0306979
ENSG00000105610.4	KLF1	-1.52573	0.0290679
ENSG00000169926.5	KLF13	0.448197	8.5421e-40
ENSG00000163884.3	KLF15	0.320285	0.000135429
ENSG00000102554.9	KLF5	-0.579099	0.00258469
ENSG00000067082.10	KLF6	0.429344	5.50713e-09
ENSG00000128607.9	KLHDC10	-0.170606	0.00248627
ENSG00000197705.5	KLHL14	-1.30754	7.54437e-08
ENSG00000114648.7	KLHL18	-0.256837	4.03613e-07
ENSG00000162413.12	KLHL21	1.11951	1.90423e-49
ENSG00000213160.5	KLHL23	-0.629269	5.95869e-17
ENSG00000114796.11	KLHL24	0.200864	0.000554116
ENSG00000146021.10	KLHL3	0.412951	0.000397119
ENSG00000186231.12	KLHL32	1.10438	2.55877e-17
ENSG00000087448.5	KLHL42	0.338526	1.70817e-11
ENSG00000172578.7	KLHL6	0.0958961	0.00271539
ENSG00000213809.4	KLRK1	-1.65021	9.66977e-19
ENSG00000117009.7	KMO	-0.349144	0.012326
ENSG00000118058.16	KMT2A	0.179974	0.0176933
ENSG00000005483.15	KMT2E	0.136202	0.0202854
ENSG00000103550.9	KNOP1	-0.156661	0.0346983
ENSG00000184445.7	KNTC1	0.14932	4.98514e-05
ENSG00000114030.8	KPNA1	-0.256557	0.009821
ENSG00000182481.4	KPNA2	-0.130202	0.000885338
ENSG00000186432.4	KPNA4	-0.17254	0.000613005
ENSG00000133703.7	KRAS	0.490217	2.12059e-22
ENSG00000172086.7	KRCC1	0.304151	0.000267985
ENSG00000129347.15	KRI1	0.182405	0.00725686
ENSG00000126777.13	KTN1	-0.238791	7.37953e-05
ENSG00000198945.3	L3MBTL3	-1.33828	7.26323e-14
ENSG00000179630.6	LACC1	-0.795777	4.32065e-44
ENSG00000053747.11	LAMA3	-1.14106	1.75286e-11
ENSG00000135862.5	LAMC1	0.305413	1.52818e-11
ENSG00000005893.11	LAMP2	-0.488944	5.32149e-14
ENSG00000134248.9	LAMTOR5	-0.376141	4.8318e-05
ENSG00000002549.8	LAP3	-0.154599	0.000469203
ENSG00000162511.7	LAPTM5	0.188648	0.000824267
ENSG00000133706.13	LARS	-0.262668	1.80225e-09
ENSG00000011376.5	LARS2	-0.128141	0.0175745
ENSG00000001497.12	LAS1L	-0.221878	1.4865e-07
ENSG00000002834.13	LASP1	0.234837	2.50207e-06
ENSG00000086730.12	LAT2	-0.77405	1.6493e-41
ENSG00000122188.8	LAX1	0.240657	1.37315e-06
ENSG00000213626.7	LBH	-1.358	4.48958e-06
ENSG00000143815.10	LBR	-0.15508	0.0023731
ENSG00000182866.12	LCK	-0.649821	2.40652e-72
ENSG00000130164.7	LDLR	0.66372	2.7565e-42
ENSG00000168675.14	LDLRAD4	0.307753	0.000358964
ENSG00000157978.7	LDLRAP1	-1.23265	1.85953e-20
ENSG00000174106.2	LEMD3	0.261572	2.96848e-07
ENSG00000117385.11	LEPRE1	0.238922	0.000464511
ENSG00000141696.8	LEPREL4	0.493368	0.0176083
ENSG00000050426.11	LETMD1	0.176407	0.0144012
ENSG00000106003.8	LFNG	-1.35542	2.12975e-08
ENSG00000116977.14	LGALS8	-0.612017	2.05535e-06
ENSG00000100600.10	LGMN	-0.362062	0.000510421
ENSG00000121454.4	LHX4	-1.43261	3.42685e-18
ENSG00000104972.10	LILRB1	-1.37008	1.52403e-21
ENSG00000050405.9	LIMA1	-0.673542	1.15337e-15
ENSG00000182541.13	LIMK2	0.204291	0.00140539
ENSG00000169756.12	LIMS1	-0.243275	2.04786e-07
ENSG00000189308.6	LIN54	0.150399	0.00138648
ENSG00000214194.4	LINC00998	0.606659	3.63855e-08
ENSG00000107798.13	LIPA	0.319791	0.00012611
ENSG00000139233.2	LLPH	-0.291233	0.00171326
ENSG00000169223.10	LMAN2	0.170849	0.000710957
ENSG00000105983.15	LMBR1	-0.161597	1.11372e-05
ENSG00000100258.13	LMF2	0.192577	0.0278809
ENSG00000048540.10	LMO3	0.717587	2.4476e-36
ENSG00000143013.8	LMO4	0.352934	0.0188106
ENSG00000136153.15	LMO7	-0.344006	1.00458e-09
ENSG00000164715.5	LMTK2	0.150683	0.00737766
ENSG00000206535.3	LNP1	0.393865	0.0036183
ENSG00000113441.11	LNPEP	-0.169356	1.20737e-05
ENSG00000196365.7	LONP1	-0.206928	9.5707e-06
ENSG00000134013.11	LOXL2	0.352142	5.41027e-08
ENSG00000139679.11	LPAR6	-0.573209	0.00206002
ENSG00000134324.7	LPIN1	-0.248712	2.26298e-07
ENSG00000101577.5	LPIN2	-0.386559	0.000641946
ENSG00000145012.8	LPP	-0.168295	0.00153383
ENSG00000110031.8	LPXN	-0.244112	1.22193e-09
ENSG00000198589.6	LRBA	-0.200511	8.55604e-06
ENSG00000171236.9	LRG1	-1.35994	0.00684622
ENSG00000139263.7	LRIG3	0.274419	0.000502992
ENSG00000118308.10	LRMP	0.130751	2.11841e-05
ENSG00000120256.5	LRP11	0.446683	0.00605832
ENSG00000134569.5	LRP4	-0.511252	2.2012e-16
ENSG00000162337.7	LRP5	-1.23354	8.11152e-05
ENSG00000138095.14	LRPPRC	-0.404111	9.10465e-27
ENSG00000185028.3	LRRC14B	1.74559	9.418e-40
ENSG00000079691.15	LRRC16A	0.380709	2.89829e-19
ENSG00000163827.8	LRRC2	-3.09724	0.0304424
ENSG00000172731.9	LRRC20	-0.454653	4.96209e-06
ENSG00000175489.9	LRRC25	-2.06694	9.19238e-05
ENSG00000137507.7	LRRC32	-1.38605	8.61406e-08
ENSG00000130764.5	LRRC47	-0.146554	0.00109918
ENSG00000163428.3	LRRC58	-0.163694	0.00133467
ENSG00000127399.10	LRRC61	0.426215	0.00552769
ENSG00000197147.8	LRRC8B	0.217079	0.0226786
ENSG00000171492.10	LRRC8D	-0.197436	0.0003875
ENSG00000124831.14	LRRFIP1	0.144385	0.0259523
ENSG00000154237.8	LRRK1	0.293911	9.74122e-07
ENSG00000041802.6	LSG1	-0.2519	6.99871e-08
ENSG00000257103.4	LSM14A	0.133694	0.002019
ENSG00000149657.15	LSM14B	-0.161395	0.00307073
ENSG00000130332.10	LSM7	-0.36273	5.9703e-12
ENSG00000130592.9	LSP1	0.112161	0.035165
ENSG00000160285.10	LSS	0.883598	2.90809e-64
ENSG00000226979.4	LTA	1.03585	3.8339e-05
ENSG00000227507.2	LTB	-0.626329	2.79882e-18
ENSG00000049323.11	LTBP1	-0.152348	0.00415781
ENSG00000168056.10	LTBP3	-0.375099	0.00993913
ENSG00000135521.8	LTV1	-0.401221	4.04038e-09
ENSG00000108848.11	LUC7L3	-0.143424	0.0301755
ENSG00000079257.3	LXN	0.418028	0.00350492
ENSG00000145220.9	LYAR	-0.261812	5.07692e-07
ENSG00000104903.4	LYL1	-0.517493	1.02413e-09
ENSG00000254087.3	LYN	-0.102621	0.0339985
ENSG00000143353.7	LYPLAL1	-0.283717	0.0222745
ENSG00000214113.6	LYRM4	-0.307357	3.95746e-08
ENSG00000186687.11	LYRM7	-0.205873	0.0013372
ENSG00000183060.11	LYSMD4	0.527884	0.00196802
ENSG00000061337.11	LZTS1	1.11804	4.95508e-89
ENSG00000107816.13	LZTS2	0.298055	0.00558541
ENSG00000003056.3	M6PR	-0.145825	0.00138136
ENSG00000180660.6	MAB21L1	-1.24173	6.38521e-07
ENSG00000183742.8	MACC1	-0.214183	0.00508991
ENSG00000127603.19	MACF1	-0.64083	4.82675e-66
ENSG00000002822.11	MAD1L1	-0.232649	4.7095e-06
ENSG00000116670.10	MAD2L2	0.19715	0.00119167
ENSG00000110514.14	MADD	-0.228913	0.00108418
ENSG00000198517.5	MAFK	-0.343028	2.49457e-05
ENSG00000105695.10	MAG	1.04292	8.56043e-19
ENSG00000081026.14	MAGI3	-1.61502	7.61787e-24
ENSG00000162385.6	MAGOH	-0.352158	1.59179e-08
ENSG00000198042.6	MAK16	-0.197846	0.000768502
ENSG00000184384.9	MAML2	2.81755	0.0177059
ENSG00000196782.8	MAML3	0.582541	0.0110702
ENSG00000111885.5	MAN1A1	0.280967	2.0873e-15
ENSG00000117643.10	MAN1C1	-2.11844	3.32224e-11
ENSG00000112893.5	MAN2A1	0.241066	2.40846e-06
ENSG00000196547.10	MAN2A2	-1.02389	1.83467e-12
ENSG00000185090.10	MANEAL	-0.660645	3.54903e-07
ENSG00000145050.11	MANF	0.145349	0.0245929
ENSG00000212916.3	MAP10	-1.66819	3.43126e-07
ENSG00000166963.8	MAP1A	-1.9612	5.96094e-23
ENSG00000065559.10	MAP2K4	-0.305389	0.000773318
ENSG00000108984.9	MAP2K6	0.481429	0.0038716
ENSG00000130758.3	MAP3K10	0.399767	0.000730211
ENSG00000073803.9	MAP3K13	0.278811	0.00513123
ENSG00000197442.8	MAP3K5	0.650539	3.82787e-38
ENSG00000135341.13	MAP3K7	-0.211445	1.24368e-06
ENSG00000104814.8	MAP4K1	0.145496	0.048065
ENSG00000071054.11	MAP4K4	0.102293	0.0121934
ENSG00000012983.7	MAP4K5	-0.163201	0.0289741
ENSG00000116871.11	MAP7D1	0.206904	0.00196897
ENSG00000185386.10	MAPK11	-0.752421	0.000112941
ENSG00000188130.9	MAPK12	-0.275685	6.43152e-06
ENSG00000156711.12	MAPK13	-2.13058	1.31997e-11
ENSG00000102882.7	MAPK3	0.219298	0.0253606
ENSG00000138834.8	MAPK8IP3	0.185503	0.0104568
ENSG00000166974.8	MAPRE2	-0.135199	0.00811655
ENSG00000075413.13	MARK3	0.111288	0.0132173
ENSG00000166986.8	MARS	-0.131922	0.00063369
ENSG00000247626.3	MARS2	-0.538281	5.68784e-18
ENSG00000086015.16	MAST2	0.163572	0.0350491
ENSG00000069020.14	MAST4	-1.86022	1.66343e-33
ENSG00000120539.10	MASTL	0.129056	0.0184859
ENSG00000168906.8	MAT2A	0.111729	0.0089459
ENSG00000088888.13	MAVS	0.112413	0.0397753
ENSG00000125952.14	MAX	-0.338304	9.31997e-09
ENSG00000103495.9	MAZ	0.351514	2.55806e-08
ENSG00000134046.7	MBD2	0.232411	7.64571e-11
ENSG00000166987.10	MBD6	0.362272	0.0289932
ENSG00000152601.13	MBNL1	0.179085	1.19116e-06
ENSG00000076770.10	MBNL3	-0.405776	5.44429e-17
ENSG00000197971.10	MBP	-0.630365	1.08407e-31
ENSG00000140943.12	MBTPS1	0.121529	0.00509569
ENSG00000012174.7	MBTPS2	-0.314087	0.0470598
ENSG00000100294.8	MCAT	-0.201646	0.00984425
ENSG00000078070.7	MCCC1	-0.199167	0.00159267
ENSG00000131844.11	MCCC2	-0.149774	0.008635
ENSG00000053524.7	MCF2L2	-0.672827	1.86618e-11
ENSG00000143384.8	MCL1	0.251688	7.20224e-12
ENSG00000153898.8	MCOLN2	-0.210602	3.7708e-06
ENSG00000055732.8	MCOLN3	-0.615833	0.000988246
ENSG00000140563.10	MCTP2	-0.420101	7.68954e-10
ENSG00000135679.17	MDM2	0.144968	0.000775639
ENSG00000198625.8	MDM4	0.211905	3.64013e-06
ENSG00000112159.7	MDN1	-0.337529	5.89771e-30
ENSG00000197880.4	MDS2	-0.541483	4.70359e-05
ENSG00000082212.7	ME2	0.233683	5.29601e-12
ENSG00000116353.11	MECR	-0.299463	0.000545763
ENSG00000108510.5	MED13	0.191288	3.56286e-08
ENSG00000148297.11	MED22	0.145815	0.0211527
ENSG00000104973.10	MED25	0.208961	0.00457632
ENSG00000108590.6	MED31	0.512765	0.0305423
ENSG00000068305.13	MEF2A	0.394687	3.76955e-11
ENSG00000116604.13	MEF2D	0.295564	9.86681e-05
ENSG00000157890.13	MEGF11	-0.686559	4.67815e-13
ENSG00000105429.8	MEGF8	-0.28966	3.02041e-06
ENSG00000167077.8	MEI1	0.616489	0.00165747
ENSG00000143995.15	MEIS1	-1.10869	0.037203
ENSG00000134138.15	MEIS2	0.572664	1.39723e-21
ENSG00000165304.3	MELK	0.368403	8.30738e-11
ENSG00000133895.10	MEN1	-0.130741	0.0487813
ENSG00000117899.6	MESDC2	0.140611	0.0201069
ENSG00000106484.10	MEST	-0.657008	1.58555e-16
ENSG00000111142.9	METAP2	-0.154451	0.00550784
ENSG00000103260.4	METRN	0.297701	0.0362055
ENSG00000176845.8	METRNL	0.229274	0.0438296
ENSG00000037897.12	METTL1	-0.383937	4.54546e-05
ENSG00000010165.15	METTL13	-0.314745	4.44592e-10
ENSG00000067365.10	METTL22	0.721201	6.47532e-17
ENSG00000181038.9	METTL23	0.265066	0.00384494
ENSG00000165055.11	METTL2B	-0.179914	0.00196897
ENSG00000165819.7	METTL3	-0.133062	0.0322576
ENSG00000185432.10	METTL7A	0.243255	1.77471e-06
ENSG00000123600.14	METTL8	0.153254	0.0018056
ENSG00000197006.9	METTL9	0.180942	0.00031558
ENSG00000181588.15	MEX3D	0.201767	0.0191437
ENSG00000140259.6	MFAP1	-0.111728	0.0391029
ENSG00000140545.10	MFGE8	1.15073	0.0309896
ENSG00000147324.6	MFHAS1	0.155554	0.00115596
ENSG00000163975.7	MFI2	-0.523026	2.7737e-05
ENSG00000116688.12	MFN2	-0.123391	0.00454042
ENSG00000100060.13	MFNG	-0.109558	0.0304638
ENSG00000092931.7	MFSD11	0.295917	0.000118357
ENSG00000161091.8	MFSD12	-0.177392	0.00148709
ENSG00000151690.10	MFSD6	0.171326	0.0259213
ENSG00000128268.11	MGAT3	0.21247	1.94631e-05
ENSG00000161013.12	MGAT4B	-0.253351	0.0024208
ENSG00000152127.4	MGAT5	-0.250058	2.30243e-07
ENSG00000198408.9	MGEA5	0.121167	0.00510337
ENSG00000170430.9	MGMT	-0.511565	7.92711e-08
ENSG00000008394.8	MGST1	-0.221061	0.0199756
ENSG00000085871.4	MGST2	0.314926	0.0144611
ENSG00000143198.8	MGST3	0.665853	6.08595e-05
ENSG00000101752.7	MIB1	0.117075	0.0141435
ENSG00000197530.8	MIB2	0.59915	6.58667e-14
ENSG00000204516.5	MICB	0.226104	7.0359e-05
ENSG00000165175.11	MID1IP1	0.231205	1.46545e-05
ENSG00000100335.8	MIEF1	-0.20676	2.45242e-08
ENSG00000198160.10	MIER1	-0.174268	0.00909658
ENSG00000271605.1	MILR1	-0.924858	1.4023e-17
ENSG00000107789.11	MINPP1	0.517245	0.0201802
ENSG00000164654.11	MIOS	-0.30485	3.1343e-05
ENSG00000027001.7	MIPEP	-0.436387	0.00402819
ENSG00000185155.7	MIXL1	0.467375	0.0199079
ENSG00000155438.7	MKI67IP	-0.415456	3.9885e-12
ENSG00000196588.10	MKL1	0.210873	0.0202154
ENSG00000128585.13	MKLN1	-0.189069	0.000314361
ENSG00000079277.15	MKNK1	0.274847	0.00495091
ENSG00000011143.12	MKS1	-4.66802	3.68372e-13
ENSG00000110917.3	MLEC	0.116822	0.0149275
ENSG00000151725.7	MLF1IP	0.217225	1.25244e-05
ENSG00000076242.10	MLH1	-0.138716	0.00998705
ENSG00000171843.11	MLLT3	-0.470799	4.55763e-13
ENSG00000108292.12	MLLT6	0.141437	0.0157724
ENSG00000139428.7	MMAB	0.539401	2.09279e-20
[truncated: 2,016 more rows]
