# Supplementary material for: MYC regulates ribosome biogenesis and mitochondrial gene expression programs through its interaction with host cell factor–1
Source: eLife. 2021 Jan 8;10:e60191. doi: 10.7554/eLife.60191 (PMC7793627; doi:10.7554/eLife.60191)
Supplement: Figure 3—source data 2. [file elife-60191-fig3-data2.xlsx]

## Sheet: Sheet1
Feature	Feature_gene_name	log2FoldChange	padj
ENSG00000165406.11	MARCH8	-0.511612	2.90939e-12
ENSG00000168385.13	SEPT2	-0.120566	0.00346205
ENSG00000184640.13	SEPT9	-0.213519	4.1118e-10
ENSG00000138758.7	SEPT11	-0.208458	7.09048e-07
ENSG00000094914.8	AAAS	0.182784	0.0096493
ENSG00000158122.7	AAED1	0.446308	3.43728e-06
ENSG00000131043.7	AAR2	0.192648	0.0148121
ENSG00000124608.4	AARS2	0.236763	0.000732229
ENSG00000165029.11	ABCA1	-0.1281	0.00620342
ENSG00000154265.11	ABCA5	-1.77989	1.27167e-34
ENSG00000064687.8	ABCA7	0.183609	0.0393765
ENSG00000197150.8	ABCB8	0.26752	0.000409757
ENSG00000114770.12	ABCC5	0.153818	0.0211676
ENSG00000173208.3	ABCD2	1.64006	0.000544154
ENSG00000033050.3	ABCF2	0.40788	1.78811e-44
ENSG00000161204.7	ABCF3	0.264941	1.84466e-08
ENSG00000160179.14	ABCG1	-0.59066	1.86758e-18
ENSG00000144827.4	ABHD10	0.254122	0.00294
ENSG00000100997.14	ABHD12	0.241475	0.00939016
ENSG00000114779.15	ABHD14B	0.229245	0.0161884
ENSG00000168792.4	ABHD15	-0.182314	0.0463442
ENSG00000107362.9	ABHD17B	-0.300107	8.62569e-06
ENSG00000136379.7	ABHD17C	0.67638	0.0281723
ENSG00000140526.12	ABHD2	-0.199233	0.00491869
ENSG00000011198.3	ABHD5	0.596824	0.00733868
ENSG00000136754.12	ABI1	-0.270836	1.481e-09
ENSG00000138443.11	ABI2	-0.338338	2.32139e-05
ENSG00000099204.14	ABLIM1	-0.436387	2.26029e-47
ENSG00000159842.10	ABR	-0.270389	2.55336e-09
ENSG00000146109.3	ABT1	0.137231	0.0158328
ENSG00000005189.15	AC004381.6	-1.30632	3.65444e-17
ENSG00000204957.1	AC006486.1	0.518731	0.0405693
ENSG00000238091.1	AC016745.1	0.569658	0.0204665
ENSG00000225885.2	AC023590.1	-1.39734	9.75033e-13
ENSG00000183889.8	AC138969.4	0.19856	0.0287867
ENSG00000167315.13	ACAA2	-0.295044	2.14553e-08
ENSG00000076555.11	ACACB	0.393726	5.34537e-06
ENSG00000177646.13	ACAD9	0.227894	2.89621e-05
ENSG00000117054.9	ACADM	-0.215757	0.000210986
ENSG00000072778.15	ACADVL	-0.202868	0.0241792
ENSG00000131584.14	ACAP3	0.331662	0.000400698
ENSG00000075239.9	ACAT1	-0.515766	3.34313e-11
ENSG00000102977.9	ACD	-0.414448	4.163e-05
ENSG00000100813.10	ACIN1	0.137166	0.00172011
ENSG00000129048.6	ACKR4	-1.05436	2.12565e-53
ENSG00000122729.14	ACO1	1.0583	5.55537e-32
ENSG00000119673.10	ACOT2	0.27031	0.025843
ENSG00000097021.15	ACOT7	0.206239	0.0224946
ENSG00000123130.12	ACOT9	-1.93152	0.0389282
ENSG00000153093.14	ACOXL	0.685977	0.043528
ENSG00000143727.11	ACP1	0.242966	1.1961e-08
ENSG00000162836.7	ACP6	0.246478	0.0001512
ENSG00000176715.11	ACSF3	-0.227034	2.04305e-06
ENSG00000151726.9	ACSL1	-0.223927	1.63159e-05
ENSG00000197142.6	ACSL5	-0.283962	6.42594e-08
ENSG00000154930.10	ACSS1	0.289606	0.0153748
ENSG00000131069.15	ACSS2	0.373832	0.00618995
ENSG00000184009.5	ACTG1	-0.164508	2.10901e-07
ENSG00000182584.4	ACTL10	-0.34752	0.0369686
ENSG00000138107.7	ACTR1A	0.129314	0.0118968
ENSG00000115073.6	ACTR1B	-0.15982	0.0318723
ENSG00000101442.8	ACTR5	0.282321	0.000347211
ENSG00000121989.10	ACVR2A	-0.648389	0.00364947
ENSG00000114739.9	ACVR2B	-0.38064	2.98312e-09
ENSG00000196839.8	ADA	-0.66599	1.96164e-28
ENSG00000168803.10	ADAL	-0.585183	2.10524e-08
ENSG00000143537.9	ADAM15	0.235212	0.00232822
ENSG00000114948.8	ADAM23	-0.52928	5.14785e-11
ENSG00000189007.11	ADAT2	-0.235351	0.00178427
ENSG00000133597.5	ADCK2	0.351602	3.31835e-09
ENSG00000164742.10	ADCY1	1.36335	0.024288
ENSG00000162104.5	ADCY9	0.799201	0.000144518
ENSG00000087274.12	ADD1	0.168288	0.000648475
ENSG00000148700.9	ADD3	-0.27062	1.73685e-06
ENSG00000006831.9	ADIPOR2	-0.200851	2.16288e-05
ENSG00000156110.9	ADK	0.219678	0.0021666
ENSG00000128165.7	ADM2	0.864939	0.00758212
ENSG00000153531.8	ADPRHL1	-0.538846	0.0291703
ENSG00000169252.4	ADRB2	-3.44821	2.64635e-06
ENSG00000173020.6	ADRBK1	-0.337211	7.62959e-20
ENSG00000106624.4	AEBP1	-0.699876	0.000259142
ENSG00000172493.16	AFF1	0.74354	1.0309e-25
ENSG00000155966.9	AFF2	-0.32543	1.62649e-11
ENSG00000183077.11	AFMID	0.508869	4.06034e-14
ENSG00000119844.10	AFTPH	-0.159726	0.00142315
ENSG00000174194.11	AGAP8	0.282682	0.0445851
ENSG00000164252.8	AGGF1	-0.145848	0.0141587
ENSG00000116771.5	AGMAT	-1.86042	1.81174e-06
ENSG00000134698.10	AGO4	-1.33295	1.08433e-40
ENSG00000155189.7	AGPAT5	-0.254293	2.18175e-08
ENSG00000158669.7	AGPAT6	0.0996313	0.0401759
ENSG00000153207.10	AHCTF1	-0.163081	6.29255e-06
ENSG00000168710.13	AHCYL1	0.142701	0.0399682
ENSG00000126705.9	AHDC1	-0.642865	0.000646895
ENSG00000106546.8	AHR	-0.267355	0.0024763
ENSG00000111732.6	AICDA	-0.787637	2.75942e-67
ENSG00000204472.8	AIF1	-2.19467	0.00330211
ENSG00000042286.10	AIFM2	-0.550964	0.00978615
ENSG00000112297.10	AIM1	-0.153405	0.000521008
ENSG00000121057.8	AKAP1	-0.147318	0.000625063
ENSG00000023516.7	AKAP11	0.366335	4.61937e-18
ENSG00000170776.15	AKAP13	-0.146373	2.79961e-06
ENSG00000197976.6	AKAP17A	-0.12493	0.047645
ENSGR0000197976.6	AKAP17A	-0.12493	0.047645
ENSG00000228537.1	AL353608.1	0.474732	0.0467603
ENSG00000170017.8	ALCAM	-0.172381	0.00736786
ENSG00000161618.5	ALDH16A1	-0.226213	0.0225863
ENSG00000059573.4	ALDH18A1	0.14087	0.000157802
ENSG00000072210.14	ALDH3A2	0.556411	6.35035e-12
ENSG00000006534.11	ALDH3B1	0.557112	0.0386524
ENSG00000112294.8	ALDH5A1	-0.319985	6.01895e-20
ENSG00000149925.12	ALDOA	-0.159541	0.000229744
ENSG00000109107.9	ALDOC	-0.343819	0.000172562
ENSG00000182858.9	ALG12	0.311954	0.0277356
ENSG00000214160.5	ALG3	0.283537	7.3671e-05
ENSG00000159063.8	ALG8	0.247889	0.000177465
ENSG00000189046.6	ALKBH2	0.308498	9.06977e-10
ENSG00000136383.6	ALPK3	-1.31395	0.0178463
ENSG00000110497.10	AMBRA1	-0.157298	0.00725093
ENSG00000123505.10	AMD1	-0.157202	0.0023351
ENSG00000184675.5	AMER1	-0.616412	1.00724e-15
ENSG00000159461.10	AMFR	-0.546064	3.82593e-47
ENSG00000160593.13	AMICA1	-3.53979	9.49299e-52
ENSG00000145020.10	AMT	0.503167	0.0315723
ENSG00000196704.7	AMZ2	-0.137029	0.0273862
ENSG00000153107.7	ANAPC1	0.175507	1.94654e-08
ENSG00000164162.8	ANAPC10	0.414019	0.000208625
ENSG00000089053.8	ANAPC5	0.133339	0.000125969
ENSG00000136859.5	ANGPTL2	0.84443	0.044673
ENSG00000029534.15	ANK1	0.594819	1.2212e-07
ENSG00000185722.12	ANKFY1	0.179384	0.0488088
ENSG00000160117.10	ANKLE1	-0.175197	5.61103e-05
ENSG00000106524.4	ANKMY2	0.31347	0.00261965
ENSG00000088448.10	ANKRD10	0.145811	0.00160028
ENSG00000167522.10	ANKRD11	0.186919	0.00574261
ENSG00000076513.12	ANKRD13A	-0.393876	1.42813e-39
ENSG00000198720.8	ANKRD13B	-0.580341	8.3639e-10
ENSG00000118454.8	ANKRD13C	-0.146251	0.0235343
ENSG00000206560.6	ANKRD28	0.119099	0.0198791
ENSG00000133302.8	ANKRD32	-0.261933	0.00201517
ENSG00000174501.10	ANKRD36C	0.144719	0.0218115
ENSG00000100124.8	ANKRD54	0.177236	0.042756
ENSG00000106013.8	ANKRD7	-0.74155	1.97404e-05
ENSG00000064999.12	ANKS1A	-0.288302	1.90353e-05
ENSG00000185046.14	ANKS1B	0.463871	0.000182897
ENSG00000168096.10	ANKS3	0.336625	0.00111806
ENSG00000165138.12	ANKS6	-0.296317	0.000121239
ENSG00000011426.6	ANLN	-0.143437	0.0123287
ENSG00000177119.11	ANO6	0.16806	0.0175531
ENSG00000185101.8	ANO9	-0.505017	0.0023351
ENSG00000143401.10	ANP32E	-0.293692	0.000610252
ENSG00000122359.13	ANXA11	-0.191637	0.00151562
ENSG00000177721.3	ANXA2R	0.420418	0.0142923
ENSG00000131480.4	AOC2	0.416237	0.0344714
ENSG00000131471.2	AOC3	0.763243	0.0415918
ENSG00000235878.4	AP001468.1	0.463143	0.044559
ENSG00000100280.12	AP1B1	-0.269802	1.1821e-14
ENSG00000152056.12	AP1S3	-2.23494	3.04177e-45
ENSG00000183020.9	AP2A2	0.224462	0.0147777
ENSG00000161203.9	AP2M1	0.249554	2.77839e-11
ENSG00000065000.11	AP3D1	0.252687	2.37276e-10
ENSG00000185009.8	AP3M1	0.175597	0.000718699
ENSG00000081014.6	AP4E1	-0.2603	7.52116e-06
ENSG00000120868.9	APAF1	-0.184287	0.014598
ENSG00000166313.14	APBB1	-1.75006	5.64686e-14
ENSG00000077420.11	APBB1IP	-0.161745	0.0370277
ENSG00000163697.12	APBB2	-0.128962	0.0102302
ENSG00000115266.7	APC2	0.53569	0.000797826
ENSG00000166181.8	API5	0.129634	0.0175459
ENSG00000179750.11	APOBEC3B	0.921994	1.47028e-05
ENSG00000244509.3	APOBEC3C	0.285537	0.00347852
ENSG00000243811.3	APOBEC3D	0.373582	0.0347275
ENSG00000239713.3	APOBEC3G	0.443212	1.41076e-05
ENSG00000128335.9	APOL2	0.214159	0.0270393
ENSG00000128284.15	APOL3	1.04387	1.20264e-23
ENSG00000221963.5	APOL6	0.31505	3.22043e-14
ENSG00000256053.3	APOPT1	0.290985	0.0268905
ENSG00000198931.6	APRT	-0.178088	0.00259609
ENSG00000021776.6	AQR	0.110847	0.0295118
ENSG00000047365.7	ARAP2	-0.277029	9.49679e-05
ENSG00000143761.9	ARF1	0.125557	0.0120079
ENSG00000242247.6	ARFGAP3	0.397817	0.000415885
ENSG00000124198.8	ARFGEF2	0.124934	0.00243853
ENSG00000164144.10	ARFIP1	-0.290084	0.000113501
ENSG00000132254.8	ARFIP2	0.161115	0.01394
ENSG00000165322.13	ARHGAP12	-0.211567	0.00905014
ENSG00000140750.12	ARHGAP17	0.686563	4.44948e-07
ENSG00000107863.12	ARHGAP21	4.92166	1.63747e-35
ENSG00000225485.3	ARHGAP23	-0.716305	0.00882043
ENSG00000138639.13	ARHGAP24	-0.297151	0.000409918
ENSG00000163219.7	ARHGAP25	0.32016	0.00259195
ENSG00000159314.7	ARHGAP27	1.16802	2.68743e-34
ENSG00000123329.13	ARHGAP9	-0.438463	1.24884e-08
ENSG00000132694.14	ARHGEF11	-1.40503	0.00156715
ENSG00000116584.13	ARHGEF2	-0.124586	0.0159921
ENSG00000163947.7	ARHGEF3	0.622415	3.21932e-17
ENSG00000129675.11	ARHGEF6	-0.397925	2.71776e-19
ENSG00000131089.9	ARHGEF9	0.485672	8.7249e-08
ENSG00000150347.10	ARID5B	0.130689	0.0442845
ENSG00000152219.4	ARL14EP	-0.153476	0.00876546
ENSG00000185305.6	ARL15	-0.43379	7.00861e-14
ENSG00000102931.3	ARL2BP	-0.252882	0.000384751
ENSG00000138175.8	ARL3	-0.259133	0.0202621
ENSG00000122644.8	ARL4A	-0.599071	0.000427375
ENSG00000113966.5	ARL6	-0.308298	0.00843685
ENSG00000170540.10	ARL6IP1	-0.171096	0.00219699
ENSG00000196503.2	ARL9	-0.667503	0.0250073
ENSG00000105676.9	ARMC6	-0.138333	0.017857
ENSG00000198960.6	ARMCX6	0.297926	0.00247538
ENSG00000130429.8	ARPC1B	-0.189407	4.28536e-05
ENSG00000163466.11	ARPC2	-0.267936	2.10583e-15
ENSG00000172995.12	ARPP21	-0.716155	0.00440234
ENSG00000113273.11	ARSB	-0.317889	0.0019138
ENSG00000104763.13	ASAH1	0.23892	0.000770466
ENSG00000204147.5	ASAH2B	-5.75089	4.76145e-05
ENSG00000088280.14	ASAP3	0.968898	3.40554e-13
ENSG00000196372.8	ASB13	-0.700516	2.17238e-41
ENSG00000100628.7	ASB2	0.551207	9.65752e-07
ENSG00000148331.7	ASB6	0.299917	2.49572e-05
ENSG00000100325.10	ASCC2	0.248742	0.000232447
ENSG00000129691.11	ASH2L	-0.186322	0.0491373
ENSG00000198356.7	ASNA1	0.157256	0.0163771
ENSG00000148219.12	ASTN2	-2.31058	0.000359575
ENSG00000064102.10	ASUN	-0.215813	0.00192356
ENSG00000171456.12	ASXL1	-0.374122	3.35931e-16
ENSG00000143970.12	ASXL2	0.156243	0.0328583
ENSG00000154438.3	ASZ1	-2.96492	3.41865e-30
ENSG00000119778.10	ATAD2B	0.233604	0.000162788
ENSG00000215915.5	ATAD3C	0.344466	0.0285848
ENSG00000123268.4	ATF1	-0.187609	0.0463442
ENSG00000171681.8	ATF7IP	-0.186757	0.0122979
ENSG00000125703.10	ATG4C	-0.348981	0.00244242
ENSG00000119787.9	ATL2	-0.210867	0.000716448
ENSG00000184743.8	ATL3	-0.295615	0.0032144
ENSG00000149311.13	ATM	0.219371	2.30551e-05
ENSG00000111676.10	ATN1	0.666918	0.0056804
ENSG00000068650.14	ATP11A	2.57668	3.48525e-06
ENSG00000105726.12	ATP13A1	0.223625	0.000551501
ENSG00000159363.13	ATP13A2	0.21769	0.0150163
ENSG00000133657.10	ATP13A3	-0.253051	3.00009e-09
ENSG00000105409.11	ATP1A3	-0.262903	0.000741638
ENSG00000143153.8	ATP1B1	-1.25634	0.00783194
ENSG00000069849.6	ATP1B3	-0.184211	0.00150131
ENSG00000174437.12	ATP2A2	-0.150114	0.000255963
ENSG00000070961.10	ATP2B1	-0.413001	3.76053e-20
ENSG00000159199.9	ATP5G1	0.292992	1.29009e-14
ENSG00000105341.14	ATP5SL	0.24863	0.000762758
ENSG00000117410.9	ATP6V0B	-0.18296	0.00129881
ENSG00000131100.8	ATP6V1E1	-0.212824	0.000292637
ENSG00000128524.4	ATP6V1F	0.176996	0.00782799
ENSG00000136888.6	ATP6V1G1	-0.168361	0.00240806
ENSG00000124406.12	ATP8A1	-0.45182	4.0535e-24
ENSG00000123472.8	ATPAF1	0.427778	1.63251e-07
ENSG00000171953.11	ATPAF2	0.262828	0.0232098
ENSG00000130770.13	ATPIF1	-0.298976	5.50604e-10
ENSG00000088812.13	ATRN	-2.06976	4.59914e-43
ENSG00000107518.12	ATRNL1	-0.758464	5.82554e-12
ENSG00000204842.10	ATXN2	0.215639	0.0178445
ENSG00000168488.14	ATXN2L	0.240684	0.0320062
ENSG00000146776.10	ATXN7L1	-0.472896	0.000755319
ENSG00000253719.2	ATXN7L3B	0.138507	0.0498884
ENSG00000148090.7	AUH	0.253206	0.0292147
ENSG00000169857.3	AVEN	-0.267437	0.00242283
ENSG00000105778.13	AVL9	0.144564	0.0024129
ENSG00000141577.9	AZI1	0.264824	0.00548751
ENSG00000176022.3	B3GALT6	-0.241102	0.000316195
ENSG00000187676.7	B3GALTL	-0.283353	0.032382
ENSG00000174684.6	B3GNT1	-0.303268	0.0108734
ENSG00000170340.10	B3GNT2	-0.2583	0.00031198
ENSG00000175711.4	B3GNTL1	-0.358462	0.000783748
ENSG00000117411.12	B4GALT2	-1.85239	1.73876e-77
ENSG00000158850.10	B4GALT3	0.260891	2.15948e-07
ENSG00000158470.5	B4GALT5	-0.289316	9.95887e-08
ENSG00000118276.7	B4GALT6	-2.97656	2.25109e-29
ENSG00000027847.9	B4GALT7	0.25147	0.0120342
ENSG00000156273.11	BACH1	-0.166262	0.0147777
ENSG00000112182.10	BACH2	-0.255537	2.16462e-10
ENSG00000002330.9	BAD	-0.364086	0.0224513
ENSG00000112208.10	BAG2	-0.225476	0.00224631
ENSG00000151929.5	BAG3	-1.43263	0.00483905
ENSG00000204463.8	BAG6	0.137629	0.0164513
ENSG00000175866.11	BAIAP2	-1.21574	5.40969e-07
ENSG00000007516.9	BAIAP3	0.658214	0.0360039
ENSG00000138376.6	BARD1	-0.141183	0.00747242
ENSG00000156127.6	BATF	1.97573	0.00451199
ENSG00000123685.4	BATF3	2.26232	0.000318604
ENSG00000076108.7	BAZ2A	0.102378	0.0480873
ENSG00000125124.7	BBS2	0.232982	0.00682621
ENSG00000138686.5	BBS7	-0.585314	1.91275e-07
ENSG00000114439.14	BBX	-0.40835	1.03996e-10
ENSG00000185825.11	BCAP31	-0.130609	0.0394236
ENSG00000050820.12	BCAR1	-1.00563	1.17433e-10
ENSG00000137936.12	BCAR3	-0.809727	7.37103e-10
ENSG00000124243.13	BCAS4	-0.274057	2.18175e-08
ENSG00000060982.10	BCAT1	-0.27474	1.08939e-09
ENSG00000105552.10	BCAT2	0.154707	0.0339223
ENSG00000107949.12	BCCIP	0.275098	4.04982e-08
ENSG00000083123.10	BCKDHB	0.422824	6.46341e-12
ENSG00000171552.8	BCL2L1	-0.150439	0.00120732
ENSG00000113916.13	BCL6	-0.171652	0.00100759
ENSG00000110987.4	BCL7A	-0.200071	2.77185e-05
ENSG00000099385.7	BCL7C	-0.584771	1.17182e-07
ENSG00000029363.11	BCLAF1	-0.261412	2.05839e-07
ENSG00000186716.15	BCR	-0.334824	8.53933e-15
ENSG00000161267.7	BDH1	0.198705	0.000868596
ENSG00000164039.10	BDH2	-0.370668	0.0120511
ENSG00000145734.14	BDP1	0.111883	0.0464512
ENSG00000178409.9	BEND3	-0.20927	0.0239063
ENSG00000127325.14	BEST3	-0.517888	3.22584e-41
ENSG00000180535.3	BHLHA15	-1.44684	0.00622948
ENSG00000122870.7	BICC1	-4.14223	0.0094832
ENSG00000151746.9	BICD1	-0.209423	0.0203358
ENSG00000185963.9	BICD2	-0.236537	9.0844e-11
ENSG00000015475.14	BID	-0.249522	9.04267e-05
ENSG00000100290.2	BIK	-0.725954	3.01596e-35
ENSG00000110934.6	BIN2	-1.07667	8.4837e-06
ENSG00000023445.9	BIRC3	-0.470464	3.76151e-17
ENSG00000166619.8	BLCAP	0.15471	0.03717
ENSG00000136573.8	BLK	-0.25669	1.63042e-07
ENSG00000108578.10	BLMH	-0.265568	3.81316e-07
ENSG00000095585.12	BLNK	-0.265313	5.30139e-07
ENSG00000189114.6	BLOC1S3	0.301171	0.0351958
ENSG00000104164.6	BLOC1S6	-0.374733	5.33328e-13
ENSG00000090013.5	BLVRB	0.224241	0.0232098
ENSG00000117475.9	BLZF1	0.323636	0.0096493
ENSG00000168283.9	BMI1	0.305469	0.00205306
ENSG00000153162.8	BMP6	-0.156891	0.0188455
ENSG00000101144.8	BMP7	-0.459726	1.29288e-38
ENSG00000116985.6	BMP8B	0.802365	0.0306521
ENSG00000204217.8	BMPR2	-0.61619	1.61332e-10
ENSG00000165733.7	BMS1	0.153451	0.000428038
ENSG00000176171.7	BNIP3	-0.459133	4.98782e-24
ENSG00000104765.10	BNIP3L	-0.18898	0.0114161
ENSG00000038219.8	BOD1L1	-0.150587	0.00517586
ENSG00000170727.7	BOP1	0.167865	0.000852362
ENSG00000136122.11	BORA	0.180656	0.0022502
ENSG00000171634.12	BPTF	-0.173714	0.000537061
ENSG00000106009.11	BRAT1	0.253875	4.74324e-05
ENSG00000012048.15	BRCA1	-0.132418	0.00289942
ENSG00000185515.10	BRCC3	0.193444	0.012642
ENSG00000100425.14	BRD1	0.241598	7.03939e-05
ENSG00000184992.10	BRI3BP	-0.446405	3.35312e-42
ENSG00000136492.4	BRIP1	-0.128818	0.0248717
ENSG00000096070.15	BRPF3	-0.260092	0.0300812
ENSG00000160469.12	BRSK1	-0.532925	0.00281027
ENSG00000185658.9	BRWD1	-0.269724	2.16183e-07
ENSG00000119411.10	BSPRY	1.30012	7.06416e-45
ENSG00000133639.3	BTG1	-0.31294	7.14146e-08
ENSG00000159388.5	BTG2	-0.140271	0.00541243
ENSG00000154640.10	BTG3	-0.249057	0.0120408
ENSG00000010671.11	BTK	0.123441	0.0431502
ENSG00000026950.12	BTN3A1	0.275709	0.00379138
ENSG00000186470.9	BTN3A2	0.254956	5.98952e-05
ENSG00000111801.11	BTN3A3	0.355982	0.000643732
ENSG00000169679.10	BUB1	-0.158215	2.59919e-05
ENSG00000156970.8	BUB1B	-0.153207	0.000646385
ENSG00000154473.13	BUB3	-0.10266	0.0210549
ENSG00000196400.3	BX255923.1	0.525344	0.00155585
ENSG00000136261.10	BZW2	-0.155504	0.0002711
ENSG00000107938.13	C10orf137	-0.119902	0.000549109
ENSG00000107815.3	C10orf2	0.186065	0.00142133
ENSG00000165511.4	C10orf25	-5.30523	0.000194419
ENSG00000171067.6	C11orf24	-0.148909	0.0244056
ENSG00000165490.8	C11orf82	-0.251768	7.37506e-05
ENSG00000168005.4	C11orf84	-0.206221	0.00421971
ENSG00000151135.5	C12orf23	-0.292425	0.00019641
ENSG00000047621.7	C12orf4	0.316168	0.000529144
ENSG00000157895.7	C12orf43	0.413172	8.06817e-07
ENSG00000123395.10	C12orf44	0.235733	0.00231492
ENSG00000130921.3	C12orf65	-0.195494	0.0213297
ENSG00000174456.9	C12orf76	-0.558932	1.02757e-09
ENSG00000133935.6	C14orf1	0.293652	0.00358881
ENSG00000170270.4	C14orf142	0.277531	0.00170946
ENSG00000133943.16	C14orf159	0.413675	1.117e-09
ENSG00000185905.3	C16orf54	-0.409571	0.0381216
ENSG00000162062.10	C16orf59	0.174382	0.0323121
ENSG00000125149.7	C16orf70	0.282705	0.0108854
ENSG00000182831.7	C16orf72	-0.125867	0.0344172
ENSG00000174109.3	C16orf91	0.237529	0.0301054
ENSG00000180336.13	C17orf104	0.761676	0.000461863
ENSG00000185504.12	C17orf70	0.166635	0.0210599
ENSG00000108666.5	C17orf75	0.204753	0.028192
ENSG00000179294.5	C17orf96	0.603286	2.17118e-25
ENSG00000074842.3	C19orf10	0.374023	1.61139e-08
ENSG00000006015.13	C19orf60	-0.162471	0.0485609
ENSG00000130813.13	C19orf66	0.487349	0.00297497
ENSG00000116922.10	C1orf109	0.257661	2.21027e-05
ENSG00000000460.12	C1orf112	-0.38688	1.78133e-08
ENSG00000197982.12	C1orf122	-0.357224	0.00436759
ENSG00000162913.9	C1orf145	-2.52119	0.0224902
ENSG00000131591.13	C1orf159	0.497904	2.88637e-05
ENSG00000142686.7	C1orf216	-0.671737	3.54354e-08
ENSG00000108561.4	C1QBP	-0.111837	0.0119194
ENSG00000139178.6	C1RL	0.809137	0.00824213
ENSG00000088854.11	C20orf194	-4.47931	3.74246e-12
ENSG00000125531.5	C20orf195	1.23646	0.0094832
ENSG00000160221.12	C21orf33	0.178576	0.00262054
ENSG00000154642.6	C21orf91	-0.21039	0.0223008
ENSG00000215012.4	C22orf29	0.150885	0.0232098
ENSG00000157617.12	C2CD2	0.362259	0.00962221
ENSG00000221843.2	C2orf16	-1.21337	0.0145344
ENSG00000186132.10	C2orf76	-0.543547	7.73518e-06
ENSG00000159239.7	C2orf81	-0.542782	0.026297
ENSG00000187699.6	C2orf88	-0.496364	1.98695e-16
ENSG00000056050.6	C4orf27	-0.232952	0.0258753
ENSG00000164096.10	C4orf3	-0.212916	0.0122737
ENSG00000174749.5	C4orf32	-0.206912	0.00173887
ENSG00000151470.8	C4orf33	0.287814	0.0465803
ENSG00000163633.6	C4orf36	0.82679	3.81989e-05
ENSG00000106804.6	C5	-0.416861	0.0163435
ENSG00000113583.6	C5orf15	0.255715	0.00144922
ENSG00000197603.9	C5orf42	-1.53971	0.00200085
ENSG00000161010.10	C5orf45	0.407989	4.18703e-06
ENSG00000164241.9	C5orf63	-6.34014	1.80677e-08
ENSG00000196821.5	C6orf106	-0.31767	2.51781e-13
ENSG00000130349.5	C6orf203	0.331264	0.00959008
ENSG00000198663.12	C6orf89	0.153498	0.0182034
ENSG00000184608.4	C8orf12	-0.622477	3.45204e-28
ENSG00000182307.8	C8orf33	0.124272	0.0419077
ENSG00000176731.7	C8orf59	0.2566	0.017659
ENSG00000198917.7	C9orf114	0.160579	0.0381581
ENSG00000204352.2	C9orf129	0.396931	0.0351868
ENSG00000171159.4	C9orf16	0.173028	0.0398179
ENSG00000135045.6	C9orf40	-0.250251	0.000140982
ENSG00000156017.8	C9orf41	-0.183512	0.00333832
ENSG00000136819.10	C9orf78	0.161823	0.00140518
ENSG00000198870.6	C9orf96	0.502591	0.0349483
ENSG00000178538.5	CA8	-6.9837	9.93632e-25
ENSG00000135932.6	CAB39	-0.107714	0.0470691
ENSG00000102547.14	CAB39L	-1.47213	1.03474e-58
ENSG00000099991.12	CABIN1	0.228041	0.00121424
ENSG00000165995.14	CACNB2	0.558557	5.08511e-05
ENSG00000182985.12	CADM1	-0.282986	2.15582e-07
ENSG00000163618.13	CADPS	-0.570874	1.85187e-33
ENSG00000136436.10	CALCOCO2	-0.32476	8.00818e-05
ENSG00000143933.12	CALM2	-0.278875	2.08703e-07
ENSG00000169885.5	CALML6	-1.74409	0.00261965
ENSG00000128595.12	CALU	0.12284	0.00783194
ENSG00000145349.12	CAMK2D	-0.27879	2.0287e-13
ENSG00000152495.6	CAMK4	-0.629401	6.69382e-36
ENSG00000110931.14	CAMKK2	-0.216537	0.000903098
ENSG00000164047.3	CAMP	0.921765	9.72257e-13
ENSG00000118200.10	CAMSAP2	-0.294805	0.000114885
ENSG00000014216.11	CAPN1	-0.173409	0.00350417
ENSG00000126247.6	CAPNS1	0.280216	5.0886e-07
ENSG00000110888.13	CAPRIN2	0.365041	3.19089e-05
ENSG00000116489.8	CAPZA1	-0.315811	1.1041e-09
ENSG00000198286.5	CARD11	0.202352	0.00119897
ENSG00000105483.12	CARD8	-0.328354	1.18719e-06
ENSG00000134905.12	CARS2	0.153614	0.00161611
ENSG00000137812.15	CASC5	-0.141519	0.0108854
ENSG00000127995.12	CASD1	0.193527	0.00876471
ENSG00000164305.13	CASP3	-0.309544	2.68633e-07
ENSG00000196954.8	CASP4	2.71413	3.47683e-19
ENSG00000165806.15	CASP7	0.209268	0.0101945
ENSG00000130940.10	CASZ1	1.14068	0.000122621
ENSG00000121691.4	CAT	0.195579	0.000729348
ENSG00000166762.12	CATSPER2	0.469726	0.0260672
ENSG00000067955.9	CBFB	-0.337057	1.65037e-15
ENSG00000114423.14	CBLB	-0.302665	0.03717
ENSG00000159228.8	CBR1	2.07612	7.22786e-11
ENSG00000160200.13	CBS	-0.324858	1.43288e-11
ENSG00000172785.14	CBWD1	0.388308	5.45719e-24
ENSG00000136682.10	CBWD2	0.358745	1.3654e-20
ENSG00000196873.11	CBWD3	0.39644	3.66984e-28
ENSG00000147996.12	CBWD5	0.385402	2.49516e-25
ENSG00000204790.8	CBWD6	0.410599	7.45913e-31
ENSG00000215126.6	CBWD7	0.40639	2.6067e-16
ENSG00000108468.10	CBX1	0.20993	0.000398925
ENSG00000122565.14	CBX3	-0.336438	1.61332e-10
ENSG00000141582.10	CBX4	-0.14416	0.0356337
ENSG00000094916.9	CBX5	-0.298213	7.42704e-13
ENSG00000183741.7	CBX6	-0.861499	2.56761e-81
ENSG00000158941.12	CCAR2	0.154123	0.00104337
ENSG00000135736.5	CCDC102A	-1.78986	1.79903e-33
ENSG00000168491.5	CCDC110	-0.192336	0.0187447
ENSG00000164221.8	CCDC112	-0.357153	0.0268746
ENSG00000007080.6	CCDC124	0.179159	0.0178706
ENSG00000104957.9	CCDC130	0.225777	0.0207412
ENSG00000004766.11	CCDC132	0.353209	8.67479e-07
ENSG00000175455.10	CCDC14	0.158999	0.0234079
ENSG00000163492.9	CCDC141	-0.239003	0.000809325
ENSG00000135637.9	CCDC142	0.197397	0.036589
ENSG00000170160.12	CCDC144A	1.19648	3.03637e-21
ENSG00000164989.11	CCDC171	-0.34079	7.47287e-07
ENSG00000177868.7	CCDC23	-0.413795	0.0140993
ENSG00000147419.12	CCDC25	0.167734	0.00394092
ENSG00000180329.9	CCDC43	0.408097	9.40389e-10
ENSG00000160124.5	CCDC58	0.221303	0.0377846
ENSG00000198624.8	CCDC69	-0.104841	0.00259609
ENSG00000110104.7	CCDC86	0.298928	0.00241173
ENSG00000115355.11	CCDC88A	-0.454847	4.80311e-26
ENSG00000166946.9	CCNDBP1	-0.17837	0.0409531
ENSG00000162063.8	CCNF	-0.142407	0.00302169
ENSG00000113328.14	CCNG1	-0.177847	0.0164513
ENSG00000134480.9	CCNH	-0.193117	0.00116705
ENSG00000205089.3	CCNI2	-2.92903	8.49123e-17
ENSG00000108100.13	CCNY	-0.134592	0.0478977
ENSG00000184451.5	CCR10	0.901199	0.00100361
ENSG00000163468.10	CCT3	0.0868579	0.0244789
ENSG00000146731.6	CCT6A	0.0886507	0.0351868
ENSG00000135535.10	CD164	0.110771	0.0483029
ENSG00000134061.4	CD180	0.444179	1.09031e-07
ENSG00000177455.7	CD19	-0.273396	2.6844e-11
ENSG00000091972.14	CD200	-5.71775	2.69583e-05
ENSG00000198087.7	CD2AP	-0.229853	1.65603e-05
ENSG00000169217.4	CD2BP2	-0.102656	0.0466957
ENSG00000167775.6	CD320	0.312009	0.000121642
ENSG00000004468.8	CD38	-0.122103	0.000396129
ENSG00000117877.6	CD3EAP	0.306051	0.000872195
ENSG00000117335.14	CD46	-0.267395	1.90252e-07
ENSG00000117091.5	CD48	-0.369242	3.75728e-08
ENSG00000143119.8	CD53	-0.575484	1.95705e-55
ENSG00000085063.10	CD59	-0.655797	2.12469e-15
ENSG00000019582.10	CD74	-0.131865	0.0349358
ENSG00000007312.8	CD79B	-0.114616	0.010878
ENSG00000110651.7	CD81	-0.205444	1.69439e-05
ENSG00000085117.7	CD82	-3.19035	6.68586e-15
ENSG00000114013.11	CD86	-0.783224	2.22891e-07
ENSG00000123146.15	CD97	-0.406518	1.36651e-05
ENSG00000102181.15	CD99L2	0.349085	0.00225662
ENSG00000130177.10	CDC16	-0.202925	0.030406
ENSG00000117399.9	CDC20	-0.16919	0.000264349
ENSG00000164045.7	CDC25A	-0.21673	1.06856e-07
ENSG00000101224.13	CDC25B	-0.158507	0.0126387
ENSG00000004897.7	CDC27	-0.11326	0.0357124
ENSG00000099804.4	CDC34	0.233072	0.000365136
ENSG00000105401.2	CDC37	0.148525	0.000961183
ENSG00000070831.11	CDC42	-0.151164	0.0105218
ENSG00000171219.8	CDC42BPG	0.663778	4.77518e-10
ENSG00000163171.6	CDC42EP3	3.40361	5.16433e-19
ENSG00000158985.9	CDC42SE2	-0.128346	0.0384371
ENSG00000094804.5	CDC6	-0.534072	7.58448e-46
ENSG00000184661.9	CDCA2	-0.145361	0.00490527
ENSG00000146670.5	CDCA5	-0.125118	0.012899
ENSG00000144354.9	CDCA7	-0.176214	0.000562561
ENSG00000170312.11	CDK1	-0.338063	2.48879e-07
ENSG00000065883.10	CDK13	-0.261374	3.24964e-13
ENSG00000058091.12	CDK14	-0.323716	5.38736e-15
ENSG00000059758.3	CDK17	-0.255408	7.96398e-07
ENSG00000117266.11	CDK18	0.866402	0.00912345
ENSG00000164885.8	CDK5	0.202336	0.0132963
ENSG00000176749.4	CDK5R1	-0.695029	0.0096433
ENSG00000101391.16	CDK5RAP1	0.134946	0.0262527
ENSG00000108465.10	CDK5RAP3	-0.151229	0.021723
ENSG00000105810.5	CDK6	-0.828513	5.41949e-117
ENSG00000145996.7	CDKAL1	0.153908	0.0153616
ENSG00000100490.5	CDKL1	-0.358411	0.0340112
ENSG00000123080.6	CDKN2C	-0.270215	5.45818e-06
ENSG00000129355.6	CDKN2D	0.339565	0.0423651
ENSG00000100526.15	CDKN3	-0.264354	8.56274e-05
ENSG00000140743.3	CDR2	-0.270567	3.47233e-07
ENSG00000101290.9	CDS2	0.257757	1.53021e-06
ENSG00000172216.4	CEBPB	0.392803	1.74368e-06
ENSG00000115816.9	CEBPZ	-0.146198	0.0133669
ENSG00000069998.8	CECR5	-0.128612	0.0281911
ENSG00000149187.13	CELF1	-0.103285	0.0014056
ENSG00000075275.12	CELSR1	0.601193	8.71901e-07
ENSG00000008300.10	CELSR3	0.66105	2.52679e-17
ENSG00000151849.10	CENPJ	0.224481	2.76452e-05
ENSG00000100162.10	CENPM	-0.254343	9.26291e-07
ENSG00000188312.9	CENPP	0.219614	0.0278199
ENSG00000116198.8	CEP104	0.143126	0.0274774
ENSG00000154240.12	CEP112	-2.33377	0.0326065
ENSG00000103995.9	CEP152	-0.152292	0.00560999
ENSG00000143702.11	CEP170	-0.120804	0.0292147
ENSG00000011523.9	CEP68	-0.376832	2.20881e-09
ENSG00000114107.4	CEP70	-0.487895	1.79559e-20
ENSG00000111860.9	CEP85L	-0.153573	0.0349095
ENSG00000121289.13	CEP89	0.398393	4.96331e-05
ENSG00000258890.2	CEP95	0.160039	0.0264827
ENSG00000167123.14	CERCAM	1.47612	0.000235319
ENSG00000100422.9	CERK	-0.441682	1.27593e-20
ENSG00000172828.8	CES3	-0.567013	0.00257796
ENSG00000165410.10	CFL2	-0.51275	6.07304e-10
ENSG00000003402.15	CFLAR	-0.207231	0.00656788
ENSG00000143375.10	CGN	-0.433044	0.0412612
ENSG00000250479.4	CHCHD10	0.317323	0.000726568
ENSG00000163528.8	CHCHD4	-0.189986	0.00733806
ENSG00000153922.6	CHD1	0.297617	0.014836
ENSG00000173575.14	CHD2	0.178401	8.69101e-05
ENSG00000170004.12	CHD3	-0.15182	0.00155549
ENSG00000111642.10	CHD4	-0.126986	1.45427e-05
ENSG00000171316.7	CHD7	-0.165667	0.000956759
ENSG00000183765.16	CHEK2	0.167294	0.0427635
ENSG00000072609.13	CHFR	0.232374	0.000177465
ENSG00000064886.9	CHI3L2	-2.15212	3.85987e-20
ENSG00000109220.6	CHIC2	-0.257907	0.0065858
ENSG00000177830.13	CHID1	0.357321	1.66112e-08
ENSG00000203668.1	CHML	0.583056	6.03499e-13
ENSG00000130724.4	CHMP2A	0.214023	0.0145458
ENSG00000115561.10	CHMP3	-0.373236	0.000684285
ENSG00000101421.3	CHMP4B	-0.279794	3.45011e-05
ENSG00000123989.9	CHPF	0.303318	0.00102335
ENSG00000171310.6	CHST11	2.24537	0.000493585
ENSG00000169105.6	CHST14	0.347557	0.0432844
ENSG00000182022.13	CHST15	-0.280516	1.38388e-08
ENSG00000140835.8	CHST4	-2.48044	2.53261e-60
ENSG00000147119.3	CHST7	0.792446	1.62662e-09
ENSG00000144021.2	CIAO1	0.125219	0.0233363
ENSG00000179583.13	CIITA	-0.202048	0.00575475
ENSG00000230055.2	CISD3	-0.256664	0.0122965
ENSG00000164442.8	CITED2	-0.402791	8.26279e-08
ENSG00000148337.15	CIZ1	0.217065	0.00131788
ENSG00000136108.10	CKAP2	-0.252925	1.20114e-05
ENSG00000136026.9	CKAP4	-0.716564	5.78332e-19
ENSG00000175216.10	CKAP5	-0.120042	0.00211876
ENSG00000223572.5	CKMT1A	1.29476	1.61005e-19
ENSG00000237289.5	CKMT1B	1.09597	2.49781e-12
ENSG00000131730.11	CKMT2	0.851344	1.59827e-05
ENSG00000104859.10	CLASRP	0.281285	9.99498e-05
ENSG00000109572.9	CLCN3	-0.126249	0.0162613
ENSG00000073464.7	CLCN4	0.61407	5.90069e-24
ENSG00000171365.11	CLCN5	0.413796	8.08798e-06
ENSG00000011021.17	CLCN6	0.358596	1.56213e-05
ENSG00000038532.10	CLEC16A	0.198603	0.0219415
ENSG00000187912.7	CLEC17A	1.23944	6.45749e-05
ENSG00000069493.10	CLEC2D	-0.303268	4.66284e-12
ENSG00000184293.3	CLECL1	-0.531663	5.28672e-05
ENSG00000153132.8	CLGN	-3.90722	3.0445e-18
ENSG00000169504.10	CLIC4	-0.315106	1.15407e-12
ENSG00000176444.14	CLK2	0.191234	0.010687
ENSG00000182372.6	CLN8	0.291239	0.000962521
ENSG00000074201.4	CLNS1A	0.192998	1.07426e-05
ENSG00000134852.10	CLOCK	0.303099	0.0134263
ENSG00000162129.8	CLPB	0.237067	0.00150471
ENSG00000049656.9	CLPTM1L	-0.145089	1.25967e-05
ENSG00000092853.9	CLSPN	-0.210176	4.20073e-05
ENSG00000139182.9	CLSTN3	0.300137	0.00337775
ENSG00000175416.8	CLTB	0.23052	0.000297492
ENSG00000141367.7	CLTC	-0.0919781	0.0128529
ENSG00000184220.6	CMSS1	0.337767	2.51757e-10
ENSG00000137200.8	CMTR1	0.162921	0.00313216
ENSG00000176571.7	CNBD1	-0.995394	2.10649e-07
ENSG00000169714.12	CNBP	-0.146153	0.000350811
ENSG00000133313.10	CNDP2	0.211923	0.00467946
ENSG00000170289.8	CNGB3	-1.56847	1.5413e-13
ENSG00000142675.13	CNKSR1	0.918086	0.000200407
ENSG00000149970.10	CNKSR2	0.230645	0.0350658
ENSG00000064666.10	CNN2	-0.133503	0.00370221
ENSG00000111596.7	CNOT2	-0.134878	0.024288
ENSG00000137161.12	CNPY3	0.2612	8.69234e-06
ENSG00000118432.11	CNR1	-0.814174	2.961e-28
ENSG00000188822.6	CNR2	0.354379	7.89505e-07
ENSG00000162852.9	CNST	-0.161278	0.0036468
ENSG00000108797.7	CNTNAP1	0.512506	0.0242572
ENSG00000152910.14	CNTNAP4	-3.23413	5.06502e-05
ENSG00000119397.12	CNTRL	-0.149162	0.000405325
ENSG00000106603.13	COA1	0.217173	7.11294e-05
ENSG00000183978.7	COA3	0.195523	0.0143328
ENSG00000082438.11	COBLL1	-0.684621	1.85709e-24
ENSG00000100473.11	COCH	-0.56883	3.36507e-23
ENSG00000135775.9	COG2	0.213995	0.000199005
ENSG00000182871.10	COL18A1	-2.00019	0.00600147
ENSG00000113163.11	COL4A3BP	-0.15237	0.0443628
ENSG00000049089.9	COL9A2	-0.29962	0.0213577
ENSG00000114744.4	COMMD2	0.391501	3.49134e-08
ENSG00000148444.11	COMMD3	0.460239	0.00289273
ENSG00000140365.11	COMMD4	-0.244869	0.00321439
ENSG00000188243.8	COMMD6	-0.181175	0.0227264
ENSG00000093010.7	COMT	-0.236966	1.19533e-05
ENSG00000172301.6	COPRS	-0.249097	0.0013207
ENSG00000111652.5	COPS7A	-0.155025	0.0439419
ENSG00000111481.5	COPZ1	0.158017	0.023466
ENSG00000167113.6	COQ4	0.631987	4.57735e-25
ENSG00000110871.10	COQ5	0.318333	0.0108485
ENSG00000102879.11	CORO1A	-0.173439	0.000413389
ENSG00000172725.9	CORO1B	-0.259573	0.00848546
ENSG00000110880.6	CORO1C	-0.232883	8.12422e-06
ENSG00000167549.14	CORO6	-1.03472	0.00172362
ENSG00000103187.6	COTL1	-0.257901	3.9025e-07
ENSG00000226976.1	COX6A1P2	0.330396	0.00213948
ENSG00000115944.10	COX7A2L	0.233026	2.07849e-05
ENSG00000108582.7	CPD	-0.206559	0.000394204
ENSG00000113742.8	CPEB4	-0.168555	0.0144222
ENSG00000135678.7	CPM	-1.72576	0.0236585
ENSG00000140848.12	CPNE2	0.227004	3.35918e-05
ENSG00000085719.7	CPNE3	0.181039	0.00347106
ENSG00000124772.7	CPNE5	-0.238418	0.00102916
ENSG00000144550.8	CPNE9	-2.50965	0.0254419
ENSG00000071894.10	CPSF1	0.184542	0.000775666
ENSG00000119203.9	CPSF3	0.0971158	0.0449874
ENSG00000088882.7	CPXM1	0.225442	0.00517586
ENSG00000182158.10	CREB3L2	0.337414	0.000407529
ENSG00000146592.12	CREB5	-0.261853	0.00215762
ENSG00000137504.9	CREBZF	-0.139161	0.00560786
ENSG00000143162.7	CREG1	0.14775	0.0364674
ENSG00000184164.10	CRELD2	0.332206	5.44432e-10
ENSG00000095794.15	CREM	-0.413372	4.60804e-05
ENSG00000150938.5	CRIM1	-0.215295	0.000129194
ENSG00000088766.7	CRLS1	0.174934	0.00481387
ENSG00000058453.12	CROCC	-0.553067	4.0434e-11
ENSG00000170275.10	CRTAP	-1.08822	2.90838e-19
ENSG00000140577.11	CRTC3	-0.847733	4.1718e-05
ENSG00000121671.7	CRY2	0.248001	0.00375371
ENSG00000233280.2	CRYBG3	-1.40289	1.09713e-27
ENSG00000080200.5	CRYBG3	-1.3112	5.30563e-16
ENSG00000116791.9	CRYZ	0.360502	0.00173928
ENSG00000124207.12	CSE1L	-0.104955	0.0200855
ENSG00000100368.9	CSF2RB	-0.528583	6.66452e-36
ENSG00000213923.6	CSNK1E	0.151228	0.00679221
ENSG00000169118.11	CSNK1G1	-0.221688	0.0094789
ENSG00000151292.13	CSNK1G3	-0.56195	5.87496e-20
ENSG00000101266.12	CSNK2A1	0.234652	2.09732e-10
ENSG00000070770.4	CSNK2A2	-0.165667	0.00370775
ENSG00000104218.9	CSPP1	0.259813	0.000610957
ENSG00000144655.10	CSRNP1	-0.284804	0.0123458
ENSG00000159176.9	CSRP1	0.185586	0.000468169
ENSG00000160213.5	CSTB	0.288203	0.0090017
ENSG00000176102.7	CSTF3	0.155808	0.0388441
ENSG00000263264.1	CTB-133G6.1	-0.157625	0.0148705
ENSG00000259363.1	CTD-2054N24.2	-1.36956	0.0194982
ENSG00000066032.14	CTNNA2	-0.833239	2.76452e-05
ENSG00000119326.10	CTNNAL1	-0.333861	2.0991e-07
ENSG00000168036.12	CTNNB1	-0.148364	0.000350926
ENSG00000198561.8	CTNND1	-1.30196	1.3576e-34
ENSG00000040531.10	CTNS	0.459262	0.031436
ENSG00000171793.9	CTPS1	-0.135899	0.00161596
ENSG00000101160.9	CTSZ	-0.501637	2.41435e-11
ENSG00000085733.11	CTTN	-1.04061	6.86635e-38
ENSG00000174177.8	CTU2	0.66869	8.46624e-23
ENSG00000108094.10	CUL2	0.148252	0.0170632
ENSG00000036257.8	CUL3	-0.287792	6.30169e-10
ENSG00000112514.11	CUTA	0.244109	1.94443e-05
ENSG00000119929.8	CUTC	-0.272066	9.49679e-05
ENSG00000111249.9	CUX2	-0.539533	1.02903e-09
ENSG00000121966.6	CXCR4	-0.0838875	0.0371269
ENSG00000154832.10	CXXC1	0.166308	0.001039
ENSG00000171604.7	CXXC5	-0.277918	0.000392338
ENSG00000065615.9	CYB5R4	-0.219452	0.000234967
ENSG00000051523.6	CYBA	-0.103432	0.0326222
ENSG00000071967.7	CYBRD1	-1.7037	9.36052e-13
ENSG00000172115.4	CYCS	0.116458	0.0197797
ENSG00000083799.13	CYLD	0.429061	8.87169e-07
ENSG00000111012.5	CYP27B1	-0.834451	3.67367e-07
ENSG00000130649.5	CYP2E1	-0.708545	5.22697e-06
ENSG00000186104.6	CYP2R1	0.348453	0.00489843
ENSG00000155016.13	CYP2U1	0.159971	0.0311154
ENSG00000001630.11	CYP51A1	-0.396831	0.000113471
ENSG00000108669.12	CYTH1	-0.179584	0.000625779
ENSG00000100055.16	CYTH4	0.957927	3.97566e-05
ENSG00000115165.5	CYTIP	-0.384445	1.89157e-21
ENSG00000136848.12	DAB2IP	-3.5113	1.3704e-50
ENSG00000132676.11	DAP3	-0.137841	0.00336081
ENSG00000161692.13	DBF4B	-0.41394	1.00284e-05
ENSG00000155368.12	DBI	-0.112838	0.019797
ENSG00000003249.9	DBNDD1	-1.14086	0.00471178
ENSG00000105516.6	DBP	0.835053	1.45467e-08
ENSG00000164934.9	DCAF13	0.250761	3.92435e-06
ENSG00000115827.9	DCAF17	0.131765	0.0468417
ENSG00000119599.12	DCAF4	0.433773	1.03845e-06
ENSG00000143164.11	DCAF6	-0.136882	0.0285634
ENSG00000057019.11	DCBLD2	-0.181541	0.0134172
ENSG00000156136.5	DCK	-0.300628	3.86031e-10
ENSG00000162290.12	DCP1A	0.20874	0.00938164
ENSG00000151065.9	DCP1B	0.39589	0.00410202
ENSG00000172795.11	DCP2	-0.250467	7.32438e-05
ENSG00000043093.9	DCUN1D1	-0.139345	0.0217454
ENSG00000109184.10	DCUN1D4	0.350763	1.13108e-07
ENSG00000137692.7	DCUN1D5	0.187818	0.00233296
ENSG00000130311.6	DDA1	0.26961	3.23552e-05
ENSG00000167986.9	DDB1	0.245135	1.15308e-12
ENSG00000197312.7	DDI2	0.111102	0.0344274
ENSG00000181418.7	DDN	-0.882288	5.78801e-16
ENSG00000244038.5	DDOST	0.206518	1.53021e-06
ENSG00000079785.10	DDX1	0.179692	0.000140434
ENSG00000178105.5	DDX10	0.250625	8.28112e-07
ENSG00000100201.14	DDX17	-0.0764237	0.0210011
ENSG00000088205.8	DDX18	-0.171348	0.00221842
ENSG00000168872.11	DDX19A	0.215731	1.93159e-06
ENSG00000165732.8	DDX21	-0.188374	4.54767e-05
ENSG00000174243.5	DDX23	0.085934	0.0314407
ENSG00000165359.10	DDX26B	0.228768	0.00516508
ENSG00000105671.7	DDX49	0.435855	1.91946e-21
ENSG00000107625.8	DDX50	0.1338	0.0444674
ENSG00000185163.5	DDX51	0.209957	6.41558e-06
ENSG00000123064.8	DDX54	-0.128888	0.00142955
ENSG00000111364.11	DDX55	0.300636	5.02443e-10
ENSG00000136271.6	DDX56	0.205246	6.74913e-07
ENSG00000177030.12	DEAF1	-0.623876	3.83364e-21
ENSG00000160570.9	DEDD2	0.234075	0.0039539
ENSG00000143753.8	DEGS1	-0.190016	0.0147591
ENSG00000168350.6	DEGS2	-2.35953	3.40817e-83
ENSG00000124795.10	DEK	-0.148015	0.00402371
ENSG00000213047.7	DENND1B	-0.150292	0.0397474
ENSG00000175984.10	DENND2C	-1.21025	8.44647e-08
ENSG00000174485.10	DENND4A	-0.185128	0.000222802
ENSG00000184014.3	DENND5A	-0.225661	0.0252632
ENSG00000170456.10	DENND5B	0.172074	0.0100599
ENSG00000205593.7	DENND6B	0.245189	0.00169361
ENSG00000024526.12	DEPDC1	0.200834	0.00403376
ENSG00000166153.12	DEPDC4	0.610631	0.0398179
ENSG00000155792.5	DEPTOR	-0.181121	5.15086e-05
ENSG00000023697.8	DERA	-0.180269	0.00216949
ENSG00000099958.10	DERL3	0.479693	9.92052e-08
ENSG00000100418.7	DESI1	-0.136145	0.00222406
ENSG00000121644.14	DESI2	-0.242732	9.76996e-07
ENSG00000169598.11	DFFB	0.275244	0.00705663
ENSG00000095397.9	DFNB31	-2.22869	8.92296e-06
ENSG00000204311.7	DFNB59	-0.74218	0.0150622
ENSG00000062282.10	DGAT2	-0.51366	0.000233089
ENSG00000070413.14	DGCR2	0.176575	0.00244326
ENSG00000065357.15	DGKA	0.25118	0.00461132
ENSG00000077044.5	DGKD	-0.223008	2.49362e-06
ENSG00000157680.11	DGKI	0.334826	3.92848e-11
ENSG00000145214.9	DGKQ	-0.29134	1.60578e-05
ENSG00000149091.11	DGKZ	-0.200396	7.24789e-05
ENSG00000114956.15	DGUOK	0.167909	0.032382
ENSG00000117682.12	DHDDS	0.143128	0.0344714
ENSG00000228716.2	DHFR	-0.197366	0.000259142
ENSG00000102967.7	DHODH	0.193311	0.0362222
ENSG00000157379.9	DHRS1	0.259003	0.0204764
ENSG00000100612.9	DHRS7	-0.185152	0.0261419
ENSG00000109016.13	DHRS7B	-0.35476	0.00487346
ENSG00000181192.7	DHTKD1	-0.21366	3.93085e-08
ENSG00000067248.5	DHX29	0.154611	0.0363289
ENSG00000132153.10	DHX30	0.17046	2.62478e-05
ENSG00000005100.8	DHX33	0.176867	0.0141309
ENSG00000150990.3	DHX37	0.166197	0.000226911
ENSG00000108406.5	DHX40	-0.206962	0.000499171
ENSG00000131504.11	DIAPH1	0.241015	8.67345e-05
ENSG00000100697.10	DICER1	-0.122622	0.00757272
ENSG00000086189.5	DIMT1	-0.197691	0.00153201
ENSG00000160305.13	DIP2A	0.234053	0.00473583
ENSG00000151240.11	DIP2C	1.29827	0.0338172
ENSG00000166938.8	DIS3L	-0.251603	4.09353e-09
ENSG00000130826.11	DKC1	-0.263514	1.92894e-10
ENSG00000176124.7	DLEU1	-0.183514	0.0151726
ENSG00000075711.16	DLG1	0.111633	0.0213984
ENSG00000150672.12	DLG2	-0.711459	1.00674e-15
ENSG00000082458.7	DLG3	0.606413	2.00622e-10
ENSG00000126787.8	DLGAP5	-0.138475	0.0322769
ENSG00000198947.10	DMD	0.747266	0.0060442
ENSG00000135164.14	DMTF1	-0.341811	9.44409e-14
ENSG00000172869.10	DMXL1	0.312914	2.34644e-10
ENSG00000104093.9	DMXL2	-0.988342	1.19503e-13
ENSG00000165506.10	DNAAF2	0.152648	0.0288124
ENSG00000105877.13	DNAH11	0.32874	0.0234079
ENSG00000158486.9	DNAH3	-1.05695	3.77755e-07
ENSG00000103423.9	DNAJA3	0.154745	0.000783373
ENSG00000090520.6	DNAJB11	0.1045	0.0186395
ENSG00000105993.10	DNAJB6	0.114625	0.0135548
ENSG00000007923.11	DNAJC11	0.1614	0.00387763
ENSG00000108176.10	DNAJC12	-2.03475	0.000309941
ENSG00000120675.4	DNAJC15	0.69234	1.4181e-06
ENSG00000205981.2	DNAJC19	0.178446	0.00506945
ENSG00000105821.10	DNAJC2	-0.219979	1.90353e-05
ENSG00000168724.10	DNAJC21	0.138393	0.00801502
ENSG00000101152.6	DNAJC5	0.100493	0.0446627
ENSG00000116675.11	DNAJC6	-0.324398	1.03347e-07
ENSG00000107554.11	DNMBP	0.317318	2.85319e-08
ENSG00000130816.10	DNMT1	-0.236647	1.70621e-08
ENSG00000088305.14	DNMT3B	-0.19712	0.0118282
ENSG00000123992.14	DNPEP	0.219166	0.000228711
ENSG00000135905.14	DOCK10	-0.401543	1.59408e-12
ENSG00000107099.11	DOCK8	-0.541542	8.29524e-36
ENSG00000088387.13	DOCK9	-0.301532	3.50471e-17
ENSG00000129932.3	DOHH	0.699341	3.89041e-21
ENSG00000125170.6	DOK4	-1.18441	7.41834e-05
ENSG00000167130.13	DOLPP1	0.230945	0.0165044
ENSG00000083097.10	DOPEY1	0.228499	0.00217478
ENSG00000142197.8	DOPEY2	0.649328	1.69735e-14
ENSG00000108963.13	DPH1	0.785311	1.80503e-11
ENSG00000132768.9	DPH2	0.304471	3.5567e-09
ENSG00000117543.15	DPH5	0.244267	0.00980449
ENSG00000134146.7	DPH6	0.327465	0.0124667
ENSG00000136908.13	DPM2	0.237339	0.0174738
ENSG00000142002.12	DPP9	0.18045	0.0216329
ENSG00000177990.7	DPY19L2	-0.597297	1.01522e-15
ENSG00000188641.8	DPYD	-0.292306	0.000150967
ENSG00000092964.12	DPYSL2	0.190612	3.01882e-06
ENSG00000117505.8	DR1	-0.191584	1.84817e-06
ENSG00000108591.5	DRG2	0.237705	0.00876471
ENSG00000113360.12	DROSHA	-0.213796	0.00665598
ENSG00000157538.9	DSCR3	0.132465	0.0164711
ENSG00000151914.13	DST	-0.277167	0.000167814
ENSG00000125868.11	DSTN	-0.15615	0.018534
ENSG00000135144.3	DTX1	-0.249891	2.97031e-07
ENSG00000110042.3	DTX4	0.658166	0.00056951
ENSG00000168393.8	DTYMK	-0.119756	0.0167182
ENSG00000141994.11	DUS3L	-0.275218	6.95774e-08
ENSG00000105865.6	DUS4L	0.20665	0.0269341
ENSG00000143507.13	DUSP10	0.898521	0.00349496
ENSG00000081721.7	DUSP12	0.346891	7.30357e-05
ENSG00000158050.4	DUSP2	-0.319513	8.4045e-05
ENSG00000112679.10	DUSP22	0.132846	0.0201369
ENSG00000108861.4	DUSP3	1.52004	0.00462136
ENSG00000128951.9	DUT	-0.133801	0.0318729
ENSG00000197102.6	DYNC1H1	-0.156446	0.000540358
ENSG00000146425.6	DYNLT1	-0.228111	0.00566335
ENSG00000157540.15	DYRK1A	-0.127351	0.00552578
ENSG00000101412.9	E2F1	-0.17045	0.00105294
ENSG00000007968.6	E2F2	-0.106125	0.0058758
ENSG00000205250.4	E2F4	0.226704	1.50495e-05
ENSG00000133740.6	E2F5	-0.49537	2.22721e-23
ENSG00000167967.11	E4F1	0.181811	0.0243001
ENSG00000145088.4	EAF2	-0.219062	0.000966506
ENSG00000103356.11	EARS2	-0.248419	0.000390657
ENSG00000147654.10	EBAG9	0.179389	0.045969
ENSG00000147155.6	EBP	0.129659	0.0339223
ENSG00000123179.9	EBPL	-0.425225	1.88605e-07
ENSG00000117298.10	ECE1	-1.68405	1.53917e-44
ENSG00000145194.13	ECE2	0.494205	2.67088e-18
ENSG00000127884.4	ECHS1	0.160402	0.0248052
ENSG00000167969.8	ECI1	-0.167901	0.0385933
ENSG00000198721.8	ECI2	-0.51207	2.33545e-07
ENSG00000114346.9	ECT2	-0.141115	0.00403376
ENSG00000088298.8	EDEM2	0.285777	0.00413726
ENSG00000116406.14	EDEM3	0.233764	3.59285e-06
ENSG00000107223.8	EDF1	0.179079	0.000157068
ENSG00000101210.6	EEF1A2	-4.29126	1.05007e-47
ENSG00000103319.7	EEF2K	0.171259	0.00829404
ENSG00000122547.6	EEPD1	0.999155	1.6085e-06
ENSG00000159658.6	EFCAB14	0.245421	0.000217956
ENSG00000090776.5	EFNB1	0.9359	4.11381e-05
ENSG00000108883.8	EFTUD2	0.104563	0.0376057
ENSG00000135766.8	EGLN1	-0.251514	5.18689e-07
ENSG00000110047.13	EHD1	-0.252913	1.30965e-05
ENSG00000181090.13	EHMT1	-0.169644	4.18794e-05
ENSG00000176396.9	EID2	0.368595	2.69583e-05
ENSG00000055332.12	EIF2AK2	2.9139	4.52913e-92
ENSG00000172071.7	EIF2AK3	-0.166995	1.53002e-05
ENSG00000128829.7	EIF2AK4	-0.26186	0.0107266
ENSG00000111361.8	EIF2B1	0.434819	3.8982e-19
ENSG00000119718.6	EIF2B2	0.245388	0.00129361
ENSG00000070785.12	EIF2B3	0.449613	2.2314e-13
ENSG00000115211.11	EIF2B4	0.291368	4.9558e-05
ENSG00000145191.7	EIF2B5	0.205023	5.38681e-08
ENSG00000143486.11	EIF2D	0.630524	6.86635e-38
ENSG00000134001.8	EIF2S1	0.239807	1.39013e-05
ENSG00000125977.6	EIF2S2	-0.0998557	0.0228065
ENSG00000106263.13	EIF3B	0.129667	0.000105681
ENSG00000175390.8	EIF3F	0.0991621	0.0341141
ENSG00000130811.6	EIF3G	0.182495	2.76877e-05
ENSG00000147677.6	EIF3H	0.0961741	0.0349483
ENSG00000178982.5	EIF3K	0.23528	3.22309e-09
ENSG00000100129.13	EIF3L	0.101081	0.0146908
ENSG00000156976.10	EIF4A2	-0.191789	0.000351144
ENSG00000135930.9	EIF4E2	-0.14391	0.0061348
ENSG00000187840.4	EIF4EBP1	0.308976	0.000942567
ENSG00000148730.6	EIF4EBP2	-0.228347	6.01554e-06
ENSG00000114867.15	EIF4G1	-0.112748	0.00102916
ENSG00000110321.11	EIF4G2	-0.168332	7.08874e-08
ENSG00000106682.10	EIF4H	-0.115313	0.00164021
ENSG00000132507.13	EIF5A	-0.169223	2.18681e-05
ENSG00000158417.6	EIF5B	0.2126	0.00167811
ENSG00000242372.2	EIF6	0.195857	0.000134075
ENSG00000066044.9	ELAVL1	0.108302	0.0264218
ENSG00000158711.9	ELK4	0.134032	0.0278543
ENSG00000118985.10	ELL2	0.523085	0.0363587
ENSG00000128886.7	ELL3	-0.345728	7.1762e-05
ENSG00000155849.11	ELMO1	-0.363525	1.49164e-06
ENSG00000170522.5	ELOVL6	-0.453504	1.35175e-06
ENSG00000134759.9	ELP2	0.188779	0.000418681
ENSG00000170291.10	ELP5	0.18185	0.0495891
ENSG00000170571.7	EMB	-0.116222	0.0259492
ENSG00000127463.9	EMC1	0.344778	3.3502e-17
ENSG00000161671.12	EMC10	0.282826	9.8973e-05
ENSG00000104412.3	EMC2	0.230611	0.0125099
ENSG00000128463.8	EMC4	0.189891	0.00339917
ENSG00000100908.9	EMC9	-0.268651	0.0157308
ENSG00000126749.10	EMG1	-0.200235	0.00527678
ENSG00000214595.7	EML6	-0.107973	0.0300595
ENSG00000154380.12	ENAH	-0.608589	5.31609e-25
ENSG00000171617.9	ENC1	-0.707043	3.98016e-10
ENSG00000149218.4	ENDOD1	0.157168	0.0278138
ENSG00000167136.6	ENDOG	-0.377598	0.00215501
ENSG00000173818.12	ENDOV	-0.453271	0.0394158
ENSG00000167280.12	ENGASE	0.465816	0.000195031
ENSG00000074800.9	ENO1	-0.185351	3.44657e-09
ENSG00000132199.14	ENOSF1	0.314642	0.000500229
ENSG00000112796.5	ENPP5	0.551245	0.00582638
ENSG00000138185.12	ENTPD1	0.694474	9.88624e-20
ENSG00000197217.8	ENTPD4	-0.123184	0.0128914
ENSG00000197586.8	ENTPD6	0.384526	2.71335e-12
ENSG00000163378.9	EOGT	1.44132	6.0796e-08
ENSG00000159023.14	EPB41	0.083028	0.0398317
ENSG00000115109.9	EPB41L5	-0.57049	0.000590303
ENSG00000085832.12	EPS15	-0.320048	2.34891e-16
ENSG00000177106.10	EPS8L2	-0.722822	2.01712e-09
ENSG00000133106.10	EPSTI1	2.07374	0.0134494
ENSG00000132591.7	ERAL1	0.510283	9.44868e-15
ENSG00000112851.10	ERBB2IP	-0.263254	2.46701e-07
ENSG00000082805.15	ERC1	-0.364818	6.11556e-09
ENSG00000186871.5	ERCC6L	-0.23903	0.00112218
ENSG00000049167.9	ERCC8	0.683707	5.61391e-14
ENSG00000105722.5	ERF	-0.268119	0.000150003
ENSG00000113719.11	ERGIC1	0.288215	6.28362e-09
ENSG00000104626.10	ERI1	-0.199045	0.00118978
ENSG00000196678.9	ERI2	-0.993247	2.46653e-12
ENSG00000117419.10	ERI3	0.285087	4.11695e-05
ENSG00000104714.9	ERICH1	0.322109	7.44088e-06
ENSG00000107566.9	ERLIN1	-0.144058	0.0413825
ENSG00000147475.10	ERLIN2	0.223744	0.000290589
ENSG00000164010.9	ERMAP	-0.778678	0.039559
ENSG00000086619.9	ERO1LB	-0.182979	0.0208911
ENSG00000089248.6	ERP29	0.381263	9.80654e-10
ENSG00000141446.6	ESCO1	0.232309	0.000181071
ENSG00000091831.17	ESR1	-0.343951	1.12643e-07
ENSG00000117868.11	ESYT2	0.181752	0.000158285
ENSG00000158220.9	ESYT3	-0.731684	0.0147777
ENSG00000143971.7	ETAA1	0.233635	0.00766484
ENSG00000140374.11	ETFA	0.190276	0.000447602
ENSG00000105672.10	ETV2	-1.18514	0.0353716
ENSG00000139083.6	ETV6	1.32055	2.60457e-14
ENSG00000142694.6	EVA1B	-0.760354	0.0406436
ENSG00000173040.8	EVC2	-1.49122	0.0328583
ENSG00000182944.13	EWSR1	-0.10294	0.00406624
ENSG00000112685.9	EXOC2	0.169294	0.01512
ENSG00000130713.11	EXOSC2	-0.138524	0.000787082
ENSG00000077348.4	EXOSC5	0.414255	3.63735e-09
ENSG00000182197.6	EXT1	-0.968222	0.024993
ENSG00000151348.9	EXT2	0.347111	3.3041e-05
ENSG00000188107.9	EYS	-0.353217	0.0199202
ENSG00000108799.8	EZH1	0.239059	0.000786961
ENSG00000197932.3	F8A1	0.450995	0.00986599
ENSG00000198444.4	F8A2	0.488556	0.0114092
ENSG00000185990.6	F8A3	0.496903	0.0094832
ENSG00000164687.6	FABP5	-0.199686	0.00222406
ENSG00000134824.9	FADS2	-0.440006	6.75754e-15
ENSG00000221968.4	FADS3	-0.409356	9.04049e-09
ENSG00000113194.8	FAF2	0.124341	0.0338172
ENSG00000103876.7	FAH	0.385845	0.0109998
ENSG00000180185.7	FAHD1	0.259442	0.043437
ENSG00000158234.8	FAIM	-0.472968	2.27745e-13
ENSG00000167106.7	FAM102A	-0.343655	3.60544e-06
ENSG00000162636.11	FAM102B	0.257707	0.00941611
ENSG00000182518.9	FAM104B	-0.339679	0.0282352
ENSG00000154124.4	FAM105B	-0.163993	0.00410128
ENSG00000065809.9	FAM107B	-0.274864	2.63228e-09
ENSG00000166801.11	FAM111A	0.193166	0.000400529
ENSG00000189057.6	FAM111B	-0.691377	2.12009e-17
ENSG00000100376.7	FAM118A	0.24467	0.000420122
ENSG00000150510.11	FAM124A	2.73263	1.16434e-07
ENSG00000122591.7	FAM126A	-0.538084	4.71851e-32
ENSG00000141699.6	FAM134C	-0.125691	0.00742408
ENSG00000082269.12	FAM135A	-0.128103	0.0446081
ENSG00000035141.3	FAM136A	0.156537	0.0102242
ENSG00000182646.12	FAM156A	0.253613	0.000440622
ENSG00000179304.12	FAM156B	0.220892	0.00192099
ENSG00000151553.10	FAM160B1	-0.206349	0.0305081
ENSG00000054965.6	FAM168A	-0.207641	0.0208154
ENSG00000152102.13	FAM168B	-0.111034	0.0143474
ENSG00000161682.10	FAM171A2	1.52085	0.00747242
ENSG00000163322.9	FAM175A	-0.196717	0.0496281
ENSG00000165660.7	FAM175B	0.260391	0.000323068
ENSG00000125386.10	FAM193A	0.217299	0.0121894
ENSG00000146067.11	FAM193B	0.264647	0.000560758
ENSG00000164125.11	FAM198B	-4.03593	0
ENSG00000235173.2	FAM203A	-0.205917	0.000531214
ENSG00000230567.3	FAM203B	-0.201214	0.00105812
ENSG00000108021.15	FAM208B	-0.268949	8.41882e-11
ENSG00000116199.7	FAM20B	-0.162371	0.0176935
ENSG00000122378.9	FAM213A	-5.49609	0.000160815
ENSG00000157870.10	FAM213B	-0.732319	0.000189266
ENSG00000047346.8	FAM214A	-0.501929	2.51228e-13
ENSG00000204856.7	FAM216A	-0.225825	0.000276951
ENSG00000250486.2	FAM218A	0.464513	0.0279791
ENSG00000225828.1	FAM229A	0.898465	0.0475477
ENSG00000122376.7	FAM35A	-0.284612	7.3705e-06
ENSG00000071889.12	FAM3A	0.276926	0.00380805
ENSG00000185112.4	FAM43A	0.514305	0.00634279
ENSG00000183508.4	FAM46C	1.43293	2.87038e-30
ENSG00000071859.10	FAM50A	0.28361	0.00875115
ENSG00000189319.9	FAM53B	-0.423977	1.74575e-24
ENSG00000120709.6	FAM53C	-0.348097	2.32202e-11
ENSG00000167695.10	FAM57A	-1.20185	4.703e-10
ENSG00000139146.9	FAM60A	-0.16597	0.00149247
ENSG00000111913.11	FAM65B	0.521645	0.000212794
ENSG00000042062.7	FAM65C	1.49203	6.46219e-19
ENSG00000154511.7	FAM69A	-0.236072	0.00474297
ENSG00000180219.1	FAM71C	1.24326	0.000238109
ENSG00000126882.8	FAM78A	-0.226714	1.53021e-06
ENSG00000157470.7	FAM81A	-0.525305	4.81981e-30
ENSG00000168672.3	FAM84B	1.20496	8.27582e-19
ENSG00000153789.8	FAM92B	-1.31583	1.82314e-58
ENSG00000166797.6	FAM96A	-0.144647	0.0376799
ENSG00000144554.6	FANCD2	0.304764	2.81662e-12
ENSG00000140525.13	FANCI	-0.16869	0.000282506
ENSG00000006607.9	FARP2	-0.521927	1.3232e-41
ENSG00000145982.7	FARS2	0.609603	3.95981e-16
ENSG00000179115.6	FARSA	0.324538	6.13172e-17
ENSG00000026103.15	FAS	1.20865	0.0122018
ENSG00000164896.15	FASTK	0.125122	0.0480046
ENSG00000138399.13	FASTKD1	0.17419	0.0141238
ENSG00000118246.9	FASTKD2	0.775986	5.29613e-34
ENSG00000188878.12	FBF1	-0.424483	0.0381407
ENSG00000105202.3	FBL	0.198536	0.00044863
ENSG00000166147.9	FBN1	-0.788008	0.0467835
ENSG00000171823.6	FBXL14	0.168379	0.00798728
ENSG00000107872.8	FBXL15	0.452401	0.00108598
ENSG00000127585.7	FBXL16	0.661658	0.00136377
ENSG00000155034.14	FBXL18	0.34123	4.01171e-05
ENSG00000138081.15	FBXO11	-0.170196	0.0112299
ENSG00000134452.15	FBXO18	-0.299724	1.71773e-07
ENSG00000118496.4	FBXO30	-0.401486	2.03983e-10
ENSG00000103264.11	FBXO31	0.188858	0.0113111
ENSG00000177051.5	FBXO46	-0.15327	0.0343714
ENSG00000112146.12	FBXO9	0.299713	9.17514e-06
ENSG00000174989.8	FBXW8	0.269404	0.00425531
ENSG00000090920.9	FCGBP	-1.20995	0.00613795
ENSG00000157107.9	FCHO2	-0.40806	0.0400354
ENSG00000197948.6	FCHSD1	0.229066	0.0137061
ENSG00000163534.10	FCRL1	0.40997	5.81442e-08
ENSG00000137714.2	FDX1	-0.186504	0.0486545
ENSG00000066926.6	FECH	0.320274	6.92233e-05
ENSG00000168496.3	FEN1	-0.0983502	0.0360203
ENSG00000151422.8	FER	-0.534984	0.000193193
ENSG00000149781.8	FERMT3	-0.240581	3.48654e-05
ENSG00000146192.10	FGD2	0.798593	1.32429e-08
ENSG00000180263.9	FGD6	-1.09782	6.07722e-59
ENSG00000114279.9	FGF12	-0.384937	0.0173392
ENSG00000102678.6	FGF9	2.39041	0.00733954
ENSG00000077782.15	FGFR1	-3.52654	9.07395e-103
ENSG00000127418.10	FGFRL1	0.471149	0.00947135
ENSG00000000938.8	FGR	-1.10131	9.62342e-23
ENSG00000091483.6	FH	0.531017	1.31874e-29
ENSG00000135723.9	FHOD1	0.284356	0.00210504
ENSG00000197296.5	FITM2	0.379625	0.0237665
ENSG00000106080.6	FKBP14	-0.470199	1.37477e-07
ENSG00000088832.10	FKBP1A	0.169429	0.00203814
ENSG00000173486.8	FKBP2	0.149257	0.0453665
ENSG00000100442.6	FKBP3	0.180006	0.0488088
ENSG00000122642.6	FKBP9	0.707645	0.0413016
ENSG00000106692.9	FKTN	0.237335	0.00621748
ENSG00000160688.14	FLAD1	0.427863	2.46821e-17
ENSG00000177731.11	FLII	0.259856	6.48868e-08
ENSG00000136068.10	FLNB	0.176689	9.53477e-05
ENSG00000137312.10	FLOT1	-0.202878	0.000695112
ENSG00000162769.8	FLVCR1	0.177418	0.0124763
ENSG00000094963.9	FMO2	0.374207	0.0403816
ENSG00000102081.9	FMR1	-0.242685	0.000756132
ENSG00000187239.12	FNBP1	-0.495617	8.22828e-46
ENSG00000217128.7	FNIP1	-0.209819	0.0113298
ENSG00000052795.8	FNIP2	-3.96338	1.03626e-74
ENSG00000165457.9	FOLR2	0.58743	3.00552e-05
ENSG00000065970.4	FOXJ2	-1.12178	0.0402814
ENSG00000164916.9	FOXK1	0.150428	0.0194542
ENSG00000053254.11	FOXN3	0.165911	0.00216424
ENSG00000139445.13	FOXN4	0.67315	0.0403037
ENSG00000118689.10	FOXO3	0.35967	0.00155207
ENSG00000114861.14	FOXP1	-0.1608	0.000400028
ENSG00000254685.2	FPGT	0.481539	0.00436041
ENSG00000111816.6	FRK	-1.04103	0.000496831
ENSG00000139926.11	FRMD6	-2.21559	0.00135908
ENSG00000147234.6	FRMPD3	0.471818	0.00213948
ENSG00000156869.8	FRRS1	0.332157	0.0159123
ENSG00000075539.9	FRYL	-0.157569	0.000678149
ENSG00000105255.6	FSD1	0.42715	0.0130202
ENSG00000106701.7	FSD1L	-0.741728	9.52024e-07
ENSG00000087086.9	FTL	-0.468056	2.6495e-21
ENSG00000140718.14	FTO	-0.219209	0.0420785
ENSG00000068438.10	FTSJ1	0.230347	0.000155836
ENSG00000108592.12	FTSJ3	0.304794	3.02203e-15
ENSG00000162613.12	FUBP1	-0.180555	2.99681e-05
ENSG00000069509.5	FUNDC1	-1.12203	4.92513e-12
ENSG00000165775.13	FUNDC2	-0.417954	6.35877e-08
ENSG00000140564.6	FURIN	-1.54784	0.0352704
ENSG00000196968.6	FUT11	-0.390803	2.55052e-12
ENSG00000010361.9	FUZ	-0.480907	3.62066e-05
ENSG00000163251.3	FZD5	0.586655	0.00347482
ENSG00000164930.7	FZD6	0.491748	8.34727e-07
ENSG00000145907.10	G3BP1	-0.130897	0.00759574
ENSG00000141349.4	G6PC3	0.350836	0.00199312
ENSG00000033327.8	GAB2	1.49744	0.000390657
ENSG00000160219.7	GAB3	2.48035	0.0093233
ENSG00000139112.6	GABARAPL1	-0.196761	0.0336933
ENSG00000204681.6	GABBR1	2.95181	6.30999e-11
ENSG00000143458.7	GABPB2	-0.228964	0.0351468
ENSG00000116717.7	GADD45A	-0.564018	4.76973e-09
ENSG00000099860.4	GADD45B	-0.388757	1.53033e-05
ENSG00000179271.1	GADD45GIP1	0.524978	2.91203e-16
ENSG00000108479.7	GALK1	-0.17376	0.039212
ENSG00000141429.9	GALNT1	-0.160693	0.0033653
ENSG00000164574.11	GALNT10	0.175049	0.0452915
ENSG00000119514.5	GALNT12	-0.429577	0.000200983
ENSG00000110328.5	GALNT18	-0.170318	0.00527436
ENSG00000143641.8	GALNT2	-0.206967	1.73868e-06
ENSG00000139629.11	GALNT6	-0.90223	1.13986e-14
ENSG00000213930.7	GALT	0.342395	0.0248436
ENSG00000130005.7	GAMT	-0.263843	0.000624908
ENSG00000111640.10	GAPDH	-0.169095	3.3041e-05
ENSG00000165219.17	GAPVD1	0.19442	7.42243e-05
ENSG00000141441.11	GAREM	-0.406349	3.81316e-07
ENSG00000157833.8	GAREML	-0.894858	0.0108838
ENSG00000185340.11	GAS2L1	-1.92044	6.87346e-08
ENSG00000139354.6	GAS2L3	0.565614	0.0066909
ENSG00000157259.6	GATAD1	0.253737	0.00107188
ENSG00000257218.1	GATC	0.189891	0.0127336
ENSG00000177628.11	GBA	-0.214336	0.0351868
ENSG00000146729.5	GBAS	0.152015	0.0495683
ENSG00000114480.8	GBE1	-0.437567	1.99408e-07
ENSG00000107862.4	GBF1	0.142354	0.0274774
ENSG00000100116.12	GCAT	-0.49555	1.95948e-07
ENSG00000135968.15	GCC2	-0.173965	0.0198893
ENSG00000105607.8	GCDH	0.219102	0.00169399
ENSG00000187210.8	GCNT1	-0.497633	1.03035e-15
ENSG00000111846.11	GCNT2	-0.221462	0.0013784
ENSG00000140905.5	GCSH	-0.335549	3.14769e-05
ENSG00000196505.6	GDAP2	0.276688	0.00262335
ENSG00000006007.7	GDE1	0.183871	0.00926575
ENSG00000179409.6	GEMIN4	-0.145614	0.0387082
ENSG00000152147.6	GEMIN6	0.189505	0.010594
ENSG00000178295.10	GEN1	-0.135462	0.0205796
ENSG00000162676.7	GFI1	0.873838	2.61118e-07
ENSG00000168827.10	GFM1	0.276259	1.24452e-09
ENSG00000145990.6	GFOD1	-0.132644	0.00238878
ENSG00000198380.8	GFPT1	-0.137686	0.0444683
ENSG00000100083.14	GGA1	0.17956	0.0206487
ENSG00000103365.11	GGA2	-0.252907	5.44401e-12
ENSG00000106128.14	GHRHR	-0.796213	0.0313281
ENSG00000106560.6	GIMAP2	1.11933	0.000111339
ENSG00000133561.11	GIMAP6	-4.09576	1.37401e-06
ENSG00000131153.4	GINS2	-0.168711	5.12597e-05
ENSG00000181938.9	GINS3	-0.350277	0.000210986
ENSG00000108262.11	GIT1	-0.38935	1.1642e-09
ENSG00000182963.5	GJC1	-0.165789	0.0147642
ENSG00000198814.8	GK	-0.276812	0.00742268
ENSG00000175066.11	GK5	-1.12779	4.25744e-60
ENSG00000165113.8	GKAP1	-0.613663	0.00655376
ENSG00000170266.11	GLB1	-0.280414	0.000342102
ENSG00000106415.8	GLCCI1	-0.476434	5.83716e-13
ENSG00000167699.9	GLOD4	0.324842	3.29605e-06
ENSG00000140632.12	GLYR1	0.123077	0.028136
ENSG00000196743.4	GM2A	0.11135	0.00694645
ENSG00000197045.8	GMFB	-0.273665	1.53361e-05
ENSG00000088256.4	GNA11	-0.298035	0.00923017
ENSG00000120063.5	GNA13	-0.292085	6.27084e-10
ENSG00000114353.12	GNAI2	0.195779	5.87065e-05
ENSG00000141404.11	GNAL	0.863732	0.0195786
ENSG00000128266.7	GNAZ	-0.28964	0.00280028
ENSG00000114450.5	GNB4	-0.64175	2.86936e-48
ENSG00000159921.10	GNE	-0.348763	4.87786e-09
ENSG00000186469.4	GNG2	-1.06562	1.43757e-09
ENSG00000204590.8	GNL1	0.149563	0.00759019
ENSG00000134697.8	GNL2	0.0968866	0.0362732
ENSG00000163938.12	GNL3	-0.135604	0.00619908
ENSG00000100522.4	GNPNAT1	-0.315847	3.75102e-05
ENSG00000111670.10	GNPTAB	-0.183875	0.000122065
ENSG00000090581.5	GNPTG	0.417525	0.00127942
ENSG00000109163.6	GNRHR	1.11734	0.00318934
ENSG00000167110.12	GOLGA2	0.253144	0.000492787
ENSG00000147533.12	GOLGA7	0.222904	0.0288127
ENSG00000116580.14	GON4L	0.16721	0.00174273
ENSG00000047932.9	GOPC	0.12917	0.0330663
ENSG00000114745.9	GORASP1	-0.185705	0.0426935
ENSG00000108433.11	GOSR2	0.17134	0.0270542
ENSG00000120053.9	GOT1	0.278724	3.55388e-05
ENSG00000125772.8	GPCPD1	-0.117337	0.0412612
ENSG00000115159.11	GPD2	-1.05525	2.36617e-76
ENSG00000112293.10	GPLD1	-0.481661	1.48403e-29
ENSG00000150625.12	GPM6A	-2.83413	6.66452e-36
ENSG00000111452.8	GPR133	0.333021	0.00895933
ENSG00000180758.10	GPR157	-0.463227	0.0323604
ENSG00000152749.7	GPR180	0.271275	2.52854e-06
ENSG00000203737.2	GPR52	-0.620552	0.0296806
ENSG00000164604.8	GPR85	-2.793	0.000498778
ENSG00000169258.6	GPRIN1	-0.316095	0.00270562
ENSG00000185477.4	GPRIN3	0.771643	1.93275e-15
ENSG00000169727.8	GPS1	0.259831	4.06954e-07
ENSG00000166123.9	GPT2	0.270259	2.94239e-08
ENSG00000233276.2	GPX1	0.17125	0.00711759
ENSG00000167468.12	GPX4	0.107397	0.0444683
ENSG00000075240.12	GRAMD4	0.204093	0.000854983
ENSG00000177885.9	GRB2	-0.19908	8.92764e-08
ENSG00000141738.9	GRB7	-2.94045	1.48845e-05
ENSG00000137106.13	GRHPR	-0.15347	0.00360426
ENSG00000171189.12	GRIK1	-1.47935	0.0293621
ENSG00000198873.10	GRK5	0.725883	2.67477e-08
ENSG00000198055.6	GRK6	0.209663	0.000109217
ENSG00000030582.12	GRN	0.286818	0.000119928
ENSG00000132463.9	GRSF1	-0.124068	0.00214193
ENSG00000103342.8	GSPT1	-0.0910021	0.0333441
ENSG00000104687.8	GSR	0.138778	0.00554712
ENSG00000148834.8	GSTO1	-0.696339	4.76102e-25
ENSG00000084207.11	GSTP1	-0.187895	2.12888e-09
ENSG00000165417.7	GTF2A1	-0.213782	0.000624908
ENSG00000140307.6	GTF2A2	-0.213536	0.00291685
ENSG00000197265.4	GTF2E2	-0.364979	1.20078e-11
ENSG00000145736.10	GTF2H2	0.155763	0.024033
ENSG00000183474.11	GTF2H2C	0.176579	0.0010339
ENSG00000111358.9	GTF2H3	0.277861	5.91118e-05
ENSG00000006704.6	GTF2IRD1	1.72109	0.0084731
ENSG00000196275.9	GTF2IRD2	-0.168607	0.0344321
ENSG00000155115.6	GTF3C6	-0.23596	0.0026338
ENSG00000151806.9	GUF1	0.136266	0.0140565
ENSG00000143774.12	GUK1	0.115386	0.0224665
ENSG00000163754.13	GYG1	-0.160154	0.0172429
ENSG00000165905.12	GYLTL1B	0.685278	0.00431352
ENSG00000136732.10	GYPC	-1.57506	0.000116229
ENSG00000105968.14	H2AFV	-0.154937	0.00103606
ENSG00000164032.7	H2AFZ	-0.292912	6.79061e-08
ENSG00000163041.5	H3F3A	-0.119748	0.0160985
ENSG00000132475.4	H3F3B	-0.151346	0.000211661
ENSG00000170445.8	HARS	0.115132	0.0349483
ENSG00000135077.4	HAVCR2	-2.66722	0.0015607
ENSG00000143575.10	HAX1	0.236208	6.69684e-08
ENSG00000113070.6	HBEGF	-0.255741	7.59776e-05
ENSG00000111727.7	HCFC2	0.435342	0.000439566
ENSG00000143630.5	HCN3	0.359566	0.00548718
ENSG00000116478.7	HDAC1	-0.236093	1.14262e-09
ENSG00000196591.7	HDAC2	0.18526	0.000568355
ENSG00000108840.11	HDAC5	0.252814	0.00067288
ENSG00000094631.14	HDAC6	0.188322	0.00683635
ENSG00000048052.17	HDAC9	-0.273721	2.4857e-09
ENSG00000111906.13	HDDC2	-0.1445	0.0495835
ENSG00000184508.6	HDDC3	0.336229	0.0355014
ENSG00000143321.14	HDGF	-0.0901786	0.0124231
ENSG00000115677.12	HDLBP	-0.110865	0.000230551
ENSG00000119285.6	HEATR1	0.228381	6.43394e-08
ENSG00000008869.7	HEATR5B	0.211967	0.000139814
ENSG00000068097.10	HEATR6	-2.03149	4.62527e-06
ENSG00000051620.6	HEBP2	0.394251	0.000106696
ENSG00000112406.4	HECA	-0.152242	0.00507521
ENSG00000165338.12	HECTD2	-1.76027	0.0493009
ENSG00000126107.10	HECTD3	0.235421	0.0352704
ENSG00000173064.6	HECTD4	0.224544	0.00199935
ENSG00000173706.8	HEG1	4.46402	1.18337e-10
ENSG00000127311.5	HELB	-0.469286	2.61118e-07
ENSG00000119969.10	HELLS	-0.132642	0.00136289
ENSG00000163312.6	HELQ	-0.33781	3.46993e-09
ENSG00000130589.12	HELZ2	0.254047	0.0330913
ENSG00000136929.8	HEMGN	1.00842	0.000748578
ENSG00000114735.5	HEMK1	0.608986	4.19095e-12
ENSG00000138641.11	HERC3	0.28357	0.00126117
ENSG00000114315.3	HES1	1.41668	7.32534e-07
ENSG00000185359.8	HGS	0.336979	8.94407e-11
ENSG00000165102.10	HGSNAT	-0.345743	5.57532e-05
ENSG00000148110.11	HIATL1	-0.359768	8.71276e-19
ENSG00000106049.4	HIBADH	0.268755	0.035133
ENSG00000181061.9	HIGD1A	-0.294863	1.35035e-07
ENSG00000127946.12	HIP1	0.199258	0.00174097
ENSG00000184357.3	HIST1H1B	0.30251	2.43194e-16
ENSG00000187837.2	HIST1H1C	0.253254	9.09517e-10
ENSG00000124575.5	HIST1H1D	0.499468	5.63553e-25
ENSG00000168298.4	HIST1H1E	0.234225	0.00344185
ENSG00000137259.2	HIST1H2AB	0.769041	1.81501e-38
ENSG00000180573.8	HIST1H2AC	0.314075	8.8338e-18
ENSG00000168274.3	HIST1H2AE	0.438842	1.00599e-26
ENSG00000196787.2	HIST1H2AG	0.244564	5.46344e-09
ENSG00000184825.4	HIST1H2AH	0.253951	1.69319e-08
ENSG00000182611.3	HIST1H2AJ	-0.591192	6.76151e-36
ENSG00000184348.2	HIST1H2AK	0.171482	0.00175654
ENSG00000198374.3	HIST1H2AL	0.283668	0.00158252
ENSG00000180596.7	HIST1H2BC	0.233391	2.41319e-12
ENSG00000197846.3	HIST1H2BF	0.469775	5.34875e-09
ENSG00000187990.4	HIST1H2BG	0.265644	9.98208e-09
ENSG00000124635.7	HIST1H2BJ	0.223366	1.51854e-06
ENSG00000197903.6	HIST1H2BK	0.332233	0.000559405
ENSG00000196374.5	HIST1H2BM	-0.532864	0.00124442
ENSG00000233822.3	HIST1H2BN	0.195181	0.0112849
ENSG00000196331.5	HIST1H2BO	0.287765	8.58278e-14
ENSG00000198366.5	HIST1H3A	-0.314818	5.05795e-10
ENSG00000124693.2	HIST1H3B	0.231962	8.05353e-07
ENSG00000197409.6	HIST1H3D	0.229567	1.58023e-07
ENSG00000182572.2	HIST1H3I	0.525567	2.22422e-08
ENSG00000197153.3	HIST1H3J	0.232565	1.55481e-07
ENSG00000124529.3	HIST1H4B	0.20379	0.0016478
ENSG00000198518.5	HIST1H4E	0.27256	1.80883e-06
ENSG00000158406.2	HIST1H4H	0.195658	0.00163423
ENSG00000198339.3	HIST1H4I	0.405621	2.41319e-12
ENSG00000198558.2	HIST1H4L	0.722757	8.77057e-29
ENSG00000183558.5	HIST2H2AA3	0.262373	2.53626e-07
ENSG00000203812.2	HIST2H2AA4	0.275225	8.0214e-08
ENSG00000184270.3	HIST2H2AB	0.29065	4.52933e-06
ENSG00000184678.8	HIST2H2BE	0.257958	0.0398803
ENSG00000203814.5	HIST2H2BF	0.416876	1.23452e-06
ENSG00000203852.3	HIST2H3A	0.161009	0.000115671
ENSG00000203811.1	HIST2H3C	0.159945	0.000211661
ENSG00000183598.3	HIST2H3D	0.440452	5.71368e-06
ENSG00000181218.4	HIST3H2A	0.302121	2.6199e-10
ENSG00000196890.3	HIST3H2BB	0.243347	6.18593e-06
ENSG00000127124.9	HIVEP3	-0.704346	9.43229e-05
ENSG00000123485.7	HJURP	-0.108353	0.0376799
ENSG00000156515.17	HK1	0.207361	6.15615e-06
ENSG00000181666.13	HKR1	0.392849	1.29126e-05
ENSG00000204257.10	HLA-DMA	-0.199466	0.0291703
ENSG00000204252.8	HLA-DOA	-0.291648	2.75551e-07
ENSG00000231389.3	HLA-DPA1	-0.45587	1.43299e-26
ENSG00000223865.6	HLA-DPB1	-0.295324	0.00192099
ENSG00000204287.9	HLA-DRA	-0.385463	3.55257e-20
ENSG00000204642.9	HLA-F	2.31745	1.83679e-07
ENSG00000071794.11	HLTF	-0.209939	0.00120313
ENSG00000101294.12	HM13	0.145919	0.0335952
ENSG00000183624.9	HMCES	-0.342619	2.18096e-18
ENSG00000143341.7	HMCN1	-4.26921	2.08795e-11
ENSG00000137309.15	HMGA1	-0.280463	0.000401774
ENSG00000189403.10	HMGB1	-0.15677	0.00995629
ENSG00000164104.7	HMGB2	-0.182697	2.31918e-08
ENSG00000029993.10	HMGB3	0.237794	0.000177344
ENSG00000112972.10	HMGCS1	0.111265	0.0456311
ENSG00000205581.6	HMGN1	-0.197381	2.43095e-05
ENSG00000198830.6	HMGN2	-0.209028	4.11915e-10
ENSG00000118418.10	HMGN3	-0.245096	2.34835e-05
ENSG00000103415.7	HMOX2	0.176246	0.00906119
ENSG00000189159.11	HN1	-0.297249	1.77346e-11
ENSG00000177733.4	HNRNPA0	-0.198565	0.00457534
ENSG00000139675.10	HNRNPA1L2	0.139441	0.0238132
ENSG00000152795.13	HNRNPDL	-0.172433	0.000113471
ENSG00000165119.14	HNRNPK	-0.143195	0.00341968
ENSG00000152413.10	HOMER1	-0.356661	3.23257e-07
ENSG00000051128.14	HOMER3	1.89267	0.0124827
ENSG00000215271.6	HOMEZ	-0.276872	0.0138562
ENSG00000095066.7	HOOK2	-0.279189	0.0335952
ENSG00000168172.4	HOOK3	-0.105941	0.045969
ENSG00000115756.8	HPCAL1	0.506676	6.93307e-07
ENSG00000186603.4	HPDL	-3.28688	2.60898e-17
ENSG00000100099.16	HPS4	-0.572191	3.74451e-73
ENSG00000135116.5	HRK	0.625315	1.69216e-15
ENSG00000136720.6	HS6ST1	0.789991	2.78136e-47
ENSG00000141854.3	hsa-mir-1199	0.598997	0.0362906
ENSG00000198189.6	HSD17B11	-7.11977	1.9302e-10
ENSG00000149084.7	HSD17B12	-0.234308	2.80908e-06
ENSG00000087076.4	HSD17B14	-1.65556	0.00275283
ENSG00000133835.10	HSD17B4	0.841809	1.34598e-38
ENSG00000132196.9	HSD17B7	0.174811	0.0161644
ENSG00000119471.10	HSDL2	-0.264974	0.00145439
ENSG00000025156.8	HSF2	-0.311821	0.00189037
ENSG00000166598.8	HSP90B1	0.319956	6.39783e-10
ENSG00000132622.6	HSPA12B	0.704873	0.0336605
ENSG00000164070.7	HSPA4L	-0.209878	0.00895895
ENSG00000106211.8	HSPB1	-1.86367	5.27117e-36
ENSG00000133265.6	HSPBP1	0.54207	1.68428e-22
ENSG00000144381.12	HSPD1	-0.122015	0.0159123
ENSG00000115541.6	HSPE1	-0.16073	0.0220418
ENSG00000142798.12	HSPG2	0.817099	5.7351e-15
ENSG00000120694.15	HSPH1	-0.225871	0.000684338
ENSG00000109854.9	HTATIP2	-2.0672	1.15484e-43
ENSG00000102241.7	HTATSF1	0.141888	0.0321432
ENSG00000067704.8	IARS2	-0.150777	0.00232565
ENSG00000163596.12	ICA1L	-0.506758	0.0060178
ENSG00000076662.5	ICAM3	0.342188	2.15582e-07
ENSG00000105376.4	ICAM5	0.311293	0.017028
ENSG00000125968.7	ID1	-1.05659	8.39346e-69
ENSG00000172201.6	ID4	-0.382879	7.10596e-06
ENSG00000182054.5	IDH2	0.755386	9.93632e-25
ENSG00000101365.16	IDH3B	0.163894	0.000291958
ENSG00000067829.14	IDH3G	0.223056	0.0111725
ENSG00000162783.8	IER5	-0.304183	0.000578741
ENSG00000010295.15	IFFO1	0.234924	0.00518654
ENSG00000119632.3	IFI27L2	-0.756422	0.0105989
ENSG00000216490.3	IFI30	0.53376	0.0062714
ENSG00000068079.3	IFI35	-0.534467	0.00303199
ENSG00000126709.10	IFI6	1.08786	0.00761456
ENSG00000152778.7	IFIT5	2.84243	0.00195806
ENSG00000142166.8	IFNAR1	0.183353	0.00333469
ENSG00000214706.6	IFRD2	-0.543713	1.60623e-30
ENSG00000163913.7	IFT122	-0.290349	6.23327e-05
ENSG00000138002.10	IFT172	-4.02621	4.56312e-29
ENSG00000114446.4	IFT57	-0.156622	0.0373647
ENSG00000096872.11	IFT74	-1.53122	2.09566e-34
ENSG00000122970.11	IFT81	-0.345084	0.00383053
ENSG00000140443.9	IGF1R	-0.413992	7.10568e-07
ENSG00000159217.5	IGF2BP1	-0.201607	0.00244107
ENSG00000136231.9	IGF2BP3	-0.175299	0.00116917
ENSG00000166130.10	IKBIP	-0.260293	0.0036572
ENSG00000185811.12	IKZF1	-0.0953855	0.0200198
ENSG00000030419.12	IKZF2	0.257914	0.00461132
ENSG00000161405.12	IKZF3	-0.349093	1.54687e-15
ENSG00000110324.5	IL10RA	-0.799941	7.13726e-49
ENSG00000243646.4	IL10RB	0.540295	4.70841e-08
ENSG00000096996.11	IL12RB1	-0.258439	0.000102155
ENSG00000172458.4	IL17D	0.396254	0.0380636
ENSG00000137496.13	IL18BP	0.466249	0.00333232
ENSG00000134460.11	IL2RA	-0.975411	2.35313e-17
ENSG00000147168.8	IL2RG	0.412391	0.0207615
ENSG00000077238.9	IL4R	-0.23431	2.57791e-09
ENSG00000168685.10	IL7R	1.8312	4.89485e-68
ENSG00000143621.12	ILF2	0.231291	9.27667e-10
ENSG00000184903.5	IMMP2L	-0.460112	1.41557e-08
ENSG00000136718.5	IMP4	0.0780082	0.048409
ENSG00000133731.5	IMPA1	-0.314928	0.000782398
ENSG00000141401.7	IMPA2	0.740146	3.27607e-15
ENSG00000106348.12	IMPDH1	-0.244495	6.34108e-07
ENSG00000178035.7	IMPDH2	-0.102936	0.0100988
ENSG00000132849.14	INADL	2.25766	1.38423e-20
ENSG00000203485.8	INF2	1.11307	9.06591e-17
ENSG00000115274.10	INO80B	0.220848	0.0244233
ENSG00000068383.14	INPP5A	-0.326571	1.251e-05
ENSG00000204084.8	INPP5B	-0.156136	0.000591961
ENSG00000168918.9	INPP5D	-0.272326	2.14283e-05
ENSG00000198825.7	INPP5F	-0.215564	0.0481505
ENSG00000132376.15	INPP5K	0.362468	0.00886952
ENSG00000125629.10	INSIG2	-0.338343	0.00725313
ENSG00000171105.9	INSR	-0.718829	3.70465e-60
ENSG00000164880.11	INTS1	0.190615	0.00552038
ENSG00000104613.7	INTS10	0.0989332	0.0374174
ENSG00000143624.9	INTS3	0.212126	0.000347211
ENSG00000149262.12	INTS4	0.139044	0.0493488
ENSG00000102786.10	INTS6	0.129317	0.0212787
ENSG00000143493.8	INTS7	-0.26179	1.05568e-06
ENSG00000119509.8	INVS	-0.34215	3.33833e-08
ENSG00000074706.9	IPCEF1	2.61407	0.0167006
ENSG00000151151.5	IPMK	-0.157023	0.0285914
ENSG00000086200.12	IPO11	0.143773	0.0153366
ENSG00000117408.6	IPO13	0.233255	0.00228365
ENSG00000065150.14	IPO5	-0.0919679	0.016301
ENSG00000205339.5	IPO7	-0.146949	0.00262335
ENSG00000173226.12	IQCB1	-0.200279	9.87233e-05
ENSG00000106012.13	IQCE	0.646151	0.00010047
ENSG00000146243.9	IRAK1BP1	0.246639	0.0305876
ENSG00000134070.4	IRAK2	-1.11751	0.014294
ENSG00000119669.3	IRF2BPL	0.520172	1.32497e-06
ENSG00000140968.6	IRF8	-0.213966	1.63239e-10
ENSG00000169047.5	IRS1	-0.452386	4.71382e-19
ENSG00000172183.10	ISG20	-0.381216	1.43798e-20
ENSG00000063241.3	ISOC2	-0.189964	0.000560758
ENSG00000182149.16	IST1	0.103866	0.0163527
ENSG00000111203.7	ITFG2	0.217655	0.014424
ENSG00000005884.13	ITGA3	0.34924	0.00569108
ENSG00000005844.13	ITGAL	-0.112868	0.0338172
ENSG00000138448.7	ITGAV	-1.88133	2.44425e-10
ENSG00000150093.14	ITGB1	-0.278679	7.41901e-13
ENSG00000119185.8	ITGB1BP1	-0.158066	0.01021
ENSG00000136156.8	ITM2B	0.301842	0.00248013
ENSG00000143772.5	ITPKB	-0.494888	4.28252e-10
ENSG00000150995.13	ITPR1	0.306127	2.32042e-08
ENSG00000148841.11	ITPRIP	-0.262928	0.0268764
ENSG00000198399.10	ITSN2	-0.200831	7.73089e-06
ENSG00000128928.4	IVD	0.826224	2.67078e-17
ENSG00000162434.7	JAK1	-0.427316	2.37554e-40
ENSG00000096968.8	JAK2	0.361118	0.000932761
ENSG00000153814.7	JAZF1	-0.307311	0.0103884
ENSG00000140044.8	JDP2	-0.288411	1.09902e-06
ENSG00000006459.6	JHDM1D	0.295046	0.0122737
ENSG00000070495.10	JMJD6	-0.219813	0.0115546
ENSG00000152409.8	JMY	-0.387949	0.000118588
ENSG00000143543.10	JTB	-0.133144	0.00800114
ENSG00000177606.5	JUN	-1.09276	2.03063e-06
ENSG00000171223.4	JUNB	-0.232846	0.00855508
ENSG00000173801.12	JUP	-2.48535	3.74753e-58
ENSG00000197256.6	KANK2	-0.435085	1.65012e-27
ENSG00000114166.7	KAT2B	-0.302866	0.000597877
ENSG00000156650.8	KAT6B	-0.17742	0.0260672
ENSG00000103510.15	KAT8	0.196386	0.000810643
ENSG00000102781.9	KATNAL1	-0.388088	9.85708e-05
ENSG00000140854.8	KATNB1	-0.206735	0.00141688
ENSG00000170852.6	KBTBD2	-0.207961	0.00392212
ENSG00000171126.7	KCNG3	-0.735412	0.00457242
ENSG00000123700.4	KCNJ2	1.19112	0.0124686
ENSG00000184261.4	KCNK12	-0.423031	4.9713e-16
ENSG00000171121.12	KCNMB3	-1.59211	0.00268685
ENSG00000135643.4	KCNMB4	-0.393803	1.42534e-11
ENSG00000143603.14	KCNN3	-0.43449	6.30192e-20
ENSG00000104783.7	KCNN4	0.643306	8.41472e-11
ENSG00000185760.11	KCNQ5	-0.282664	2.35644e-05
ENSG00000124134.4	KCNS1	-0.656083	0.0291955
ENSG00000174943.5	KCTD13	0.303005	0.00370616
ENSG00000100379.13	KCTD17	-0.396665	0.0294739
ENSG00000136636.8	KCTD3	-0.205997	0.00221134
ENSG00000243335.4	KCTD7	0.638254	6.23374e-20
ENSG00000134901.8	KDELC1	-6.56404	6.58328e-07
ENSG00000136240.5	KDELR2	0.124799	0.0354439
ENSG00000173120.10	KDM2A	0.14797	0.0029752
ENSG00000089094.12	KDM2B	-0.146153	0.000786961
ENSG00000115548.12	KDM3A	-0.220898	0.00023681
ENSG00000107077.13	KDM4C	0.14036	0.0218437
ENSG00000112232.8	KHDRBS2	-4.96742	1.51953e-09
ENSG00000131773.9	KHDRBS3	-1.28549	0.000929078
ENSG00000138030.8	KHK	0.467802	0.00443372
ENSG00000100441.5	KHNYN	-0.144611	0.0195223
ENSG00000080608.9	KIAA0020	-0.142659	0.00862845
ENSG00000235750.5	KIAA0040	-0.34146	2.51844e-14
ENSG00000007202.10	KIAA0100	0.121658	0.00205076
ENSG00000166803.6	KIAA0101	-0.207205	0.000351041
ENSG00000226777.3	KIAA0125	-0.534692	3.74246e-12
ENSG00000081791.4	KIAA0141	0.195311	0.00326847
ENSG00000164961.11	KIAA0196	0.204864	0.00733954
ENSG00000145016.9	KIAA0226	-0.109906	0.0363516
ENSG00000166398.8	KIAA0355	-0.277575	0.00240806
ENSG00000136813.10	KIAA0368	-0.1856	2.23751e-07
ENSG00000135709.8	KIAA0513	-0.945328	3.29605e-06
ENSG00000121210.11	KIAA0922	-0.303848	1.92994e-20
ENSG00000100364.14	KIAA0930	0.250467	3.89133e-10
ENSG00000164151.7	KIAA0947	0.245826	4.1471e-08
ENSG00000135315.7	KIAA1009	-0.276309	0.0446231
ENSG00000138688.11	KIAA1109	-0.223528	2.22849e-05
ENSG00000163807.4	KIAA1143	0.137632	0.0430361
ENSG00000122203.10	KIAA1191	0.201881	0.0218433
ENSG00000109265.8	KIAA1211	-0.640044	7.8288e-07
ENSG00000116299.12	KIAA1324	1.34227	0.00239568
ENSG00000107036.7	KIAA1432	-0.212483	2.08637e-08
ENSG00000084444.9	KIAA1467	0.253708	0.0127528
ENSG00000134444.9	KIAA1468	0.209762	0.00905014
ENSG00000144320.9	KIAA1715	0.205026	0.00217478
ENSG00000166004.10	KIAA1731	-0.146736	0.00855508
ENSG00000198894.3	KIAA1737	0.157894	0.0444197
ENSG00000134313.10	KIDINS220	0.128805	0.0178336
ENSG00000163808.12	KIF15	0.212712	0.000137115
ENSG00000129250.7	KIF1C	-0.262357	4.302e-05
ENSG00000116852.10	KIF21B	0.222957	0.000364595
ENSG00000186638.11	KIF24	-0.205289	0.00736402
ENSG00000068796.12	KIF2A	-0.128791	0.0133095
ENSG00000131437.11	KIF3A	-0.134754	0.0318195
ENSG00000101350.6	KIF3B	-0.25191	3.48093e-07
ENSG00000084731.9	KIF3C	-0.85503	2.16183e-07
ENSG00000075945.8	KIFAP3	-0.937778	1.0652e-27
ENSG00000167702.7	KIFC2	0.203947	0.0139242
ENSG00000174996.7	KLC2	0.260561	0.00103231
ENSG00000155090.10	KLF10	-0.137891	0.0395223
ENSG00000118922.12	KLF12	-0.271804	1.36651e-05
ENSG00000169926.5	KLF13	0.135007	0.000580151
ENSG00000128607.9	KLHDC10	0.30865	3.7472e-09
ENSG00000174010.9	KLHL15	-0.178281	0.00296969
ENSG00000187961.9	KLHL17	0.35886	0.0162467
ENSG00000114648.7	KLHL18	0.11725	0.0431502
ENSG00000109466.9	KLHL2	-0.294426	9.17514e-06
ENSG00000162413.12	KLHL21	0.847971	1.19078e-26
ENSG00000213160.5	KLHL23	0.550629	2.32858e-14
ENSG00000114796.11	KLHL24	-0.465213	5.32045e-16
ENSG00000119771.10	KLHL29	1.22965	0.000976625
ENSG00000146021.10	KLHL3	-5.9652	7.46513e-39
ENSG00000109790.12	KLHL5	-0.324299	2.61652e-10
ENSG00000172578.7	KLHL6	-0.357423	6.20447e-35
ENSG00000204775.4	KM-PA-2	0.176129	0.000529142
ENSG00000103550.9	KNOP1	0.174551	0.0179043
ENSG00000128944.9	KNSTRN	-0.177427	0.0121474
ENSG00000182481.4	KPNA2	-0.0898009	0.036353
ENSG00000186395.6	KRT10	-0.242472	0.040631
ENSG00000171435.9	KSR2	1.03473	4.90829e-08
ENSG00000105700.6	KXD1	0.287631	1.63657e-05
ENSG00000126790.7	L3HYPDH	-0.35996	0.00198033
ENSG00000261732.1	LA16c-431H6.6	0.844632	0.000731795
ENSG00000179630.6	LACC1	-0.168251	0.01021
ENSG00000135537.12	LACE1	0.380193	0.0142406
ENSG00000091136.9	LAMB1	0.333651	0.0412612
ENSG00000185896.9	LAMP1	0.181283	0.000482683
ENSG00000005893.11	LAMP2	-0.191638	0.0096493
ENSG00000134248.9	LAMTOR5	0.245997	0.0123378
ENSG00000002549.8	LAP3	0.115122	0.0148698
ENSG00000161813.16	LARP4	0.239516	2.31486e-07
ENSG00000107929.10	LARP4B	0.206571	2.88068e-08
ENSG00000011376.5	LARS2	0.477487	2.77121e-25
ENSG00000001497.12	LAS1L	0.436006	5.50199e-28
ENSG00000002834.13	LASP1	-0.395062	2.80358e-15
ENSG00000086730.12	LAT2	0.350649	3.5086e-10
ENSG00000122188.8	LAX1	-0.359307	4.35312e-12
ENSG00000213626.7	LBH	2.15425	1.43299e-26
ENSG00000143815.10	LBR	-0.153924	0.0031667
ENSG00000179528.11	LBX2	2.34721	0.00366823
ENSG00000168806.6	LCMT2	-0.524026	7.07322e-07
ENSG00000134333.9	LDHA	-0.210736	9.36753e-08
ENSG00000111716.8	LDHB	-0.178438	0.00044863
ENSG00000130164.7	LDLR	0.141522	0.0171649
ENSG00000168675.14	LDLRAD4	0.532675	1.09781e-10
ENSG00000157978.7	LDLRAP1	-0.628567	5.36018e-06
ENSG00000138795.5	LEF1	-0.588157	1.18985e-28
ENSG00000197980.7	LEKR1	-0.527483	0.00390904
ENSG00000161904.7	LEMD2	0.147994	0.0171337
ENSG00000167615.12	LENG8	0.20178	0.00490527
ENSG00000117385.11	LEPRE1	0.205061	0.00514795
ENSG00000050426.11	LETMD1	0.312137	4.27736e-06
ENSG00000106003.8	LFNG	1.21806	1.73741e-10
ENSG00000119862.8	LGALSL	-0.750329	3.04741e-06
ENSG00000050405.9	LIMA1	-0.449588	3.78193e-07
ENSG00000136490.4	LIMD2	-0.218645	3.60981e-05
ENSG00000169756.12	LIMS1	-0.413265	2.3241e-18
ENSG00000256977.6	LIMS3	-0.3262	0.048128
ENSG00000183814.11	LIN9	-0.19693	0.00908852
ENSG00000214194.4	LINC00998	0.351665	0.00515652
ENSG00000107798.13	LIPA	0.410721	7.27864e-07
ENSG00000079435.5	LIPE	0.23561	0.0288689
ENSG00000152022.7	LIX1L	-0.723673	1.1096e-12
ENSG00000073350.9	LLGL2	0.663981	5.14162e-08
ENSG00000169223.10	LMAN2	0.129812	0.0174738
ENSG00000164187.6	LMBRD2	0.16277	0.0098583
ENSG00000176619.6	LMNB2	0.103209	0.00642688
ENSG00000048540.10	LMO3	-0.6781	3.30093e-26
ENSG00000136153.15	LMO7	0.218092	0.000223254
ENSG00000113441.11	LNPEP	-0.318926	1.03637e-17
ENSG00000165714.6	LOH12CR1	0.464701	0.00160398
ENSG00000102910.9	LONP2	-0.628832	3.50049e-28
ENSG00000134013.11	LOXL2	-0.817341	8.71495e-35
ENSG00000184574.5	LPAR5	-0.647635	9.27781e-05
ENSG00000111684.6	LPCAT3	0.16387	0.0179074
ENSG00000072071.12	LPHN1	0.494176	0.00120732
ENSG00000134324.7	LPIN1	-0.413875	6.00628e-18
ENSG00000145012.8	LPP	-0.238903	3.77546e-06
ENSG00000110031.8	LPXN	-0.1348	0.0024419
ENSG00000126243.4	LRFN3	0.617952	0.0339997
ENSG00000144749.9	LRIG1	-0.0904274	0.0350881
ENSG00000198799.7	LRIG2	0.218174	0.00289965
ENSG00000139263.7	LRIG3	-0.263548	0.00234102
ENSG00000118308.10	LRMP	-0.234902	2.9824e-15
ENSG00000120256.5	LRP11	-0.39186	0.0418616
ENSG00000134569.5	LRP4	-0.389123	2.27005e-09
ENSG00000163956.6	LRPAP1	0.177884	0.0217441
ENSG00000138095.14	LRPPRC	0.443456	1.04944e-32
ENSG00000185028.3	LRRC14B	-0.913711	6.34091e-07
ENSG00000079691.15	LRRC16A	0.115099	0.0248436
ENSG00000184434.7	LRRC19	-0.932916	0.0498185
ENSG00000172731.9	LRRC20	-0.284716	0.00993958
ENSG00000137507.7	LRRC32	-0.73317	0.00791687
ENSG00000066557.5	LRRC40	-0.314936	6.77342e-05
ENSG00000132128.12	LRRC41	0.221501	0.00721044
ENSG00000169683.3	LRRC45	0.313783	0.000197878
ENSG00000130764.5	LRRC47	0.125961	0.00738386
ENSG00000161328.10	LRRC56	-0.64482	0.0252448
ENSG00000136802.7	LRRC8A	0.3178	5.2017e-05
ENSG00000171492.10	LRRC8D	-0.303497	5.0169e-08
ENSG00000041802.6	LSG1	0.197199	4.62441e-05
ENSG00000257103.4	LSM14A	-0.115786	0.0121887
ENSG00000204392.6	LSM2	0.223775	0.00172094
ENSG00000106355.5	LSM5	-0.270018	0.00017042
ENSG00000130332.10	LSM7	0.12794	0.037108
ENSG00000226979.4	LTA	1.22822	1.03845e-06
ENSG00000111144.5	LTA4H	0.139266	0.0147181
ENSG00000227507.2	LTB	0.2446	0.0013124
ENSG00000213903.4	LTB4R	0.275409	0.00807555
ENSG00000049323.11	LTBP1	-0.755308	6.05213e-54
ENSG00000090006.13	LTBP4	0.311111	0.00196887
ENSG00000135521.8	LTV1	0.181793	0.0163709
ENSG00000169641.9	LUZP1	-0.221462	0.0226625
ENSG00000240053.8	LY6G5B	0.595669	0.0129244
ENSG00000145220.9	LYAR	-0.125956	0.0349869
ENSG00000254087.3	LYN	-0.189809	3.05134e-05
ENSG00000099949.14	LZTR1	0.226415	0.00799952
ENSG00000061337.11	LZTS1	-0.570183	6.15091e-19
ENSG00000003056.3	M6PR	0.330753	1.88726e-15
ENSG00000180660.6	MAB21L1	-2.69965	1.99058e-16
ENSG00000183742.8	MACC1	0.313278	1.41154e-05
ENSG00000127603.19	MACF1	-0.636579	1.475e-63
ENSG00000172264.12	MACROD2	-2.41512	3.00191e-32
ENSG00000002822.11	MAD1L1	-0.135419	0.0171663
ENSG00000164109.9	MAD2L1	-0.127346	0.044559
ENSG00000090316.11	MAEA	0.140878	0.0301084
ENSG00000179632.5	MAF1	0.134969	0.0060178
ENSG00000198517.5	MAFK	-0.208959	0.0218772
ENSG00000105695.10	MAG	1.29798	2.3443e-28
ENSG00000081026.14	MAGI3	0.57851	4.9234e-05
ENSG00000111196.5	MAGOHB	0.200884	0.00506753
ENSG00000156928.4	MALSU1	0.266929	6.67705e-05
ENSG00000111885.5	MAN1A1	-0.571098	8.04661e-55
ENSG00000177239.10	MAN1B1	0.339641	1.85326e-07
ENSG00000112893.5	MAN2A1	-0.278237	2.18803e-07
ENSG00000196547.10	MAN2A2	0.359803	0.0166108
ENSG00000109323.4	MANBA	-0.237011	0.044591
ENSG00000166963.8	MAP1A	-1.40297	1.15407e-12
ENSG00000169032.5	MAP2K1	-0.293139	2.0596e-11
ENSG00000108984.9	MAP2K6	0.565375	0.000783748
ENSG00000095015.5	MAP3K1	-0.20822	0.000394089
ENSG00000073803.9	MAP3K13	0.40674	2.88632e-05
ENSG00000047849.17	MAP4	-0.232468	0.00268859
ENSG00000168067.7	MAP4K2	0.18795	0.00104347
ENSG00000071054.11	MAP4K4	-0.143993	0.000283192
ENSG00000180834.3	MAP6D1	-0.630056	1.91087e-11
ENSG00000164114.14	MAP9	-0.334024	0.0101803
ENSG00000185386.10	MAPK11	-2.3055	1.61054e-23
ENSG00000112062.6	MAPK14	-0.124667	0.0236986
ENSG00000069956.7	MAPK6	-0.123982	0.031355
ENSG00000107643.11	MAPK8	-0.197439	0.0350658
ENSG00000121653.7	MAPK8IP1	0.726016	0.0484975
ENSG00000114738.6	MAPKAPK3	0.14144	0.0248436
ENSG00000166974.8	MAPRE2	-0.366977	6.30238e-15
ENSG00000175130.6	MARCKSL1	-0.45192	1.65712e-15
ENSG00000166986.8	MARS	0.170713	6.18452e-06
ENSG00000247626.3	MARS2	0.19639	0.00415203
ENSG00000086015.16	MAST2	-0.471475	1.59162e-11
ENSG00000069020.14	MAST4	0.492738	0.000214006
ENSG00000015479.13	MATR3	-0.112186	0.0150622
ENSG00000088888.13	MAVS	0.116341	0.0389282
ENSG00000125952.14	MAX	0.170725	0.00852784
ENSG00000141644.13	MBD1	0.125078	0.0111844
ENSG00000134046.7	MBD2	-0.161943	2.0788e-05
ENSG00000071655.13	MBD3	-0.131754	0.00841455
ENSG00000129071.5	MBD4	-0.192083	0.000529144
ENSG00000214309.3	MBLAC1	-0.415888	0.00417274
ENSG00000152601.13	MBNL1	-0.215707	5.44784e-09
ENSG00000139793.14	MBNL2	-0.156153	0.0300812
ENSG00000011258.11	MBTD1	-0.314955	5.94594e-10
ENSG00000143384.8	MCL1	-0.234167	7.48422e-10
ENSG00000065328.12	MCM10	-0.1736	0.000239035
ENSG00000073111.9	MCM2	-0.0998127	0.0357003
ENSG00000112118.13	MCM3	-0.17935	1.76079e-09
ENSG00000104738.12	MCM4	-0.38198	1.00868e-36
ENSG00000076003.4	MCM6	-0.215123	6.17016e-05
ENSG00000111877.13	MCM9	-0.197187	0.0123341
ENSG00000153898.8	MCOLN2	-0.130855	0.0095638
ENSG00000014641.13	MDH1	-0.268304	6.34108e-07
ENSG00000135679.17	MDM2	-0.258638	2.89973e-10
ENSG00000112159.7	MDN1	0.166329	1.03191e-07
ENSG00000124733.3	MEA1	-0.240381	0.00141499
ENSG00000116353.11	MECR	0.561008	4.98274e-13
ENSG00000125686.7	MED1	0.103107	0.0349483
ENSG00000108510.5	MED13	-0.211721	4.17227e-09
ENSG00000008838.13	MED24	0.235159	1.82773e-05
ENSG00000118579.7	MED28	0.124141	0.00851228
ENSG00000081189.9	MEF2C	-0.31299	1.70158e-07
ENSG00000157890.13	MEGF11	-0.613407	5.17712e-10
ENSG00000133895.10	MEN1	0.264006	8.74631e-06
ENSG00000146834.9	MEPCE	-0.164916	0.000128196
ENSG00000140406.2	MESDC1	-0.162168	0.0231493
ENSG00000117899.6	MESDC2	0.3433	3.0747e-10
ENSG00000106484.10	MEST	0.194246	0.030843
ENSG00000172878.9	METAP1D	-1.73026	2.20369e-19
ENSG00000111142.9	METAP2	-0.723081	3.04104e-48
ENSG00000203791.9	METTL10	0.366566	0.00507521
ENSG00000214756.3	METTL12	-0.478594	0.00115142
ENSG00000169519.15	METTL15	-0.556881	7.31751e-10
ENSG00000127804.8	METTL16	0.340635	7.14146e-08
ENSG00000123427.11	METTL21B	0.628514	0.0114784
ENSG00000165819.7	METTL3	0.146033	0.0188949
ENSG00000176624.9	MEX3C	-0.20306	2.91122e-07
ENSG00000140259.6	MFAP1	-0.146839	0.00584027
ENSG00000168958.15	MFF	0.138252	0.0427748
ENSG00000140545.10	MFGE8	2.61371	4.78623e-09
ENSG00000147324.6	MFHAS1	-0.476222	3.41393e-25
ENSG00000116688.12	MFN2	0.113489	0.0119194
ENSG00000118855.14	MFSD1	-0.379302	3.75938e-07
ENSG00000168389.13	MFSD2A	0.272881	0.000184545
ENSG00000128268.11	MGAT3	-0.496457	1.56221e-23
ENSG00000102858.8	MGRN1	0.23051	0.0252635
ENSG00000008394.8	MGST1	-0.469704	2.49384e-07
ENSG00000085871.4	MGST2	0.447199	0.000356553
ENSG00000143198.8	MGST3	0.463707	0.0133095
ENSG00000154305.12	MIA3	0.169361	0.00425816
ENSG00000101752.7	MIB1	-0.153381	0.00110163
ENSG00000155545.15	MIER3	-0.918001	7.48684e-37
ENSG00000116691.6	MIIP	0.276105	0.00044863
ENSG00000141503.11	MINK1	0.363534	9.84002e-05
ENSG00000107789.11	MINPP1	-2.15292	1.18594e-13
ENSG00000027001.7	MIPEP	0.347104	0.0233685
ENSG00000129534.9	MIS18BP1	-0.147287	0.035133
ENSG00000079277.15	MKNK1	-0.250687	0.0235037
ENSG00000099875.10	MKNK2	-0.127039	0.00517635
ENSG00000011143.12	MKS1	-4.82832	1.32859e-10
ENSG00000151725.7	MLF1IP	-0.162574	0.00281649
ENSG00000089693.6	MLF2	-0.21034	0.00241719
ENSG00000168404.8	MLKL	1.87208	3.02199e-12
ENSG00000130382.7	MLLT1	0.222411	0.0184331
ENSG00000171843.11	MLLT3	-0.592753	1.20544e-18
ENSG00000108292.12	MLLT6	-0.192796	0.000796565
ENSG00000132763.10	MMACHC	0.176145	0.045969
ENSG00000196549.6	MME	-0.291099	1.07315e-13
ENSG00000155229.16	MMS19	0.138953	0.00387102
ENSG00000130675.10	MNX1	0.850307	6.62753e-05
ENSG00000165943.4	MOAP1	0.273239	0.00382222
ENSG00000173542.4	MOB1B	-0.433725	5.93862e-09
ENSG00000172081.9	MOB3A	-0.190654	0.00423745
ENSG00000142961.10	MOB3C	0.613477	0.0478019
ENSG00000164077.9	MON1A	-0.1668	0.0481505
ENSG00000133422.8	MORC2	-0.152572	0.0358061
ENSG00000159256.8	MORC3	0.151171	0.0228651
ENSG00000079931.10	MOXD1	-2.19431	1.82281e-12
ENSG00000060762.14	MPC1	0.347974	2.374e-05
ENSG00000129255.10	MPDU1	-0.289733	0.00995629
ENSG00000168303.6	MPLKIP	0.29994	0.000383467
ENSG00000105926.11	MPP6	-0.286107	3.22581e-07
ENSG00000150054.14	MPP7	-0.326443	4.84211e-06
ENSG00000154889.12	MPPE1	0.262468	0.0120136
ENSG00000133030.15	MPRIP	0.179733	0.0343573
ENSG00000128309.12	MPST	0.174726	0.0140567
ENSG00000115204.10	MPV17	0.310709	2.4393e-05
ENSG00000254858.5	MPV17L2	0.267115	0.00137361
ENSG00000158887.11	MPZ	0.981716	0.000794039
ENSG00000197965.7	MPZL1	-0.313359	1.50381e-11
ENSG00000160588.5	MPZL3	-0.354578	0.00281027
ENSG00000020922.8	MRE11A	-0.197537	0.000835542
ENSG00000118242.11	MREG	-7.08707	1.4915e-10
ENSG00000178988.10	MRFAP1L1	-0.15243	0.0165887
ENSG00000101189.5	MRGBP	-0.213286	0.000592604
ENSG00000037757.9	MRI1	0.271772	0.0104084
ENSG00000129282.8	MRM1	0.164448	0.0493488
ENSG00000173141.4	MRP63	0.335219	7.15638e-08
ENSG00000169288.13	MRPL1	0.501112	2.10524e-08
ENSG00000159111.8	MRPL10	0.18028	0.0156601
ENSG00000174547.9	MRPL11	0.399014	9.33019e-21
ENSG00000112110.5	MRPL18	0.244416	2.29701e-06
ENSG00000112651.7	MRPL2	0.265895	0.00190401
ENSG00000108826.11	MRPL27	-0.21619	0.000773678
ENSG00000106591.3	MRPL32	0.219249	0.000777227
ENSG00000132313.10	MRPL35	-0.127222	0.0197393
ENSG00000171421.8	MRPL36	0.211773	0.00199716
ENSG00000116221.11	MRPL37	0.170219	0.000301505
ENSG00000185608.4	MRPL40	0.237811	0.00387763
ENSG00000182154.7	MRPL41	0.157813	0.00906303
ENSG00000174100.5	MRPL45	0.227785	0.00244242
ENSG00000259494.1	MRPL46	0.348623	0.000529142
ENSG00000175581.9	MRPL48	-0.226569	0.0036572
ENSG00000172590.14	MRPL52	0.202736	0.000215724
ENSG00000162910.14	MRPL55	0.200722	0.00661693
ENSG00000143436.6	MRPL9	0.173864	0.0312269
ENSG00000181991.11	MRPS11	0.398218	4.22605e-11
ENSG00000128626.7	MRPS12	0.249955	2.21484e-05
ENSG00000120333.4	MRPS14	0.212577	0.0027171
ENSG00000116898.7	MRPS15	0.441036	2.21807e-21
ENSG00000239789.1	MRPS17	0.491944	5.80797e-05
ENSG00000204568.7	MRPS18B	-0.144892	0.0235941
ENSG00000181610.8	MRPS23	0.247826	6.6992e-05
ENSG00000102738.6	MRPS31	0.174273	0.00430964
ENSG00000061794.8	MRPS35	0.34571	2.61325e-08
ENSG00000243927.1	MRPS6	-0.444666	0.000128633
ENSG00000125445.6	MRPS7	0.120035	0.0224665
ENSG00000124532.10	MRS2	0.145169	0.0286458
ENSG00000170903.6	MSANTD4	-0.150312	0.0393097
ENSG00000116062.10	MSH6	-0.178317	1.95504e-08
ENSG00000147065.12	MSN	-2.63581	0
ENSG00000134602.11	MST4	-0.271246	3.4002e-07
ENSG00000125459.10	MSTO1	0.283725	0.000200308
ENSG00000198695.2	MT-ND6	-0.305073	0.0208595
ENSG00000120832.5	MTERFD3	-0.460788	0.00536759
ENSG00000188786.9	MTF1	0.406163	0.000789329
ENSG00000143033.13	MTF2	-0.474559	4.2532e-31
ENSG00000100714.11	MTHFD1	0.120215	0.0113921
ENSG00000065911.7	MTHFD2	-0.153654	0.00721868
ENSG00000085760.10	MTIF2	-0.283234	3.55613e-08
ENSG00000150712.6	MTMR12	-0.107675	0.0278543
ENSG00000108389.5	MTMR4	0.118319	0.0120313
ENSG00000139505.10	MTMR6	0.419322	1.1296e-13
ENSG00000102043.11	MTMR8	-0.612784	0.0382715
ENSG00000120662.11	MTRF1	0.373634	6.65331e-14
ENSG00000124275.10	MTRR	0.14006	0.020743
ENSG00000173171.10	MTX1	0.179601	0.025367
ENSG00000177034.10	MTX3	0.178823	0.00663539
ENSG00000205277.5	MUC12	-1.34354	0.0161137
ENSG00000176945.12	MUC20	-1.66931	0.00811655
ENSG00000167508.6	MVD	0.28286	7.97839e-06
ENSG00000110921.7	MVK	0.514156	1.58266e-11
ENSG00000183486.8	MX2	-2.26535	0.0150145
ENSG00000123933.10	MXD4	0.547397	3.95207e-19
ENSG00000118513.14	MYB	-0.377867	3.35272e-09
ENSG00000185697.12	MYBL1	-0.266522	3.48017e-14
ENSG00000101057.11	MYBL2	-0.139852	0.00480993
ENSG00000133026.8	MYH10	0.240131	1.12934e-05
ENSG00000133392.12	MYH11	0.610878	0.000381897
ENSG00000215375.2	MYL5	-0.264569	0.0225099
ENSG00000092841.14	MYL6	-0.31495	4.98106e-11
ENSG00000196465.6	MYL6B	-0.342027	0.00541377
ENSG00000007944.10	MYLIP	-0.256569	0.0225507
ENSG00000176658.12	MYO1D	-0.348931	7.45226e-13
ENSG00000157483.4	MYO1E	-0.360917	1.23542e-31
ENSG00000136286.10	MYO1G	-0.211511	9.11561e-07
ENSG00000197535.10	MYO5A	-0.216628	3.65243e-05
ENSG00000120729.5	MYOT	-1.24491	0.029521
ENSG00000170476.11	MZB1	-0.109222	0.0281497
ENSG00000244754.4	N4BP2L2	0.351404	1.10446e-05
ENSG00000102030.11	NAA10	0.205335	0.0311154
ENSG00000164134.8	NAA15	-0.134149	0.0177385
ENSG00000172766.14	NAA16	0.27472	1.44248e-08
ENSG00000135040.11	NAA35	0.182393	0.0343532
ENSG00000121579.8	NAA50	-0.168685	0.00214204
ENSG00000138744.10	NAAA	-0.386116	0.000328513
ENSG00000138386.12	NAB1	-0.208041	0.00189037
ENSG00000173559.8	NABP1	-0.234955	0.000851516
ENSG00000160877.5	NACC1	0.265248	5.69294e-06
ENSG00000172890.7	NADSYN1	-0.148872	0.021964
ENSG00000159593.10	NAE1	0.301883	7.75453e-08
ENSG00000105835.7	NAMPT	-0.166839	0.00247699
ENSG00000188613.5	NANOS1	-0.207282	0.030348
ENSG00000170191.4	NANP	-0.238881	0.00536402
ENSG00000187109.9	NAP1L1	-0.2246	1.90075e-05
ENSG00000205531.8	NAP1L4	-0.0941869	0.0137821
ENSG00000105402.3	NAPA	0.191878	0.0136639
ENSG00000147813.11	NAPRT1	0.347449	0.00132783
ENSG00000131400.3	NAPSA	0.582618	1.70789e-06
ENSG00000141562.13	NARF	-0.317037	7.03877e-09
ENSG00000128915.7	NARG2	0.137128	0.0226625
ENSG00000134440.7	NARS	0.0975783	0.0373219
ENSG00000135372.4	NAT10	0.138975	0.000520248
ENSG00000109065.7	NAT9	0.205658	0.0345797
ENSG00000134369.11	NAV1	0.391108	0.0137212
ENSG00000172915.14	NBEA	-0.393402	1.38367e-05
ENSG00000219481.6	NBPF1	-0.197802	0.00215205
ENSG00000163386.16	NBPF10	-0.307261	0.0041602
ENSG00000122497.13	NBPF14	-0.333473	0.00205477
ENSG00000203832.6	NBPF20	0.299509	0.00556741
ENSG00000188554.9	NBR1	-0.1553	0.0479209
ENSG00000109805.5	NCAPG	-0.266978	3.2084e-06
ENSG00000136937.8	NCBP1	0.216317	3.5132e-05
ENSG00000158517.9	NCF1	0.428759	3.02522e-12
ENSG00000100365.10	NCF4	-0.892722	1.83651e-66
ENSG00000123338.8	NCKAP1L	0.11758	0.0173392
ENSG00000167566.12	NCKAP5L	0.54652	2.09735e-06
ENSG00000213672.3	NCKIPSD	0.212887	0.027401
ENSG00000125912.6	NCLN	0.144352	0.0104083
ENSG00000140396.8	NCOA2	-0.140177	0.0396727
ENSG00000124151.14	NCOA3	-0.511586	1.79035e-50
ENSG00000111912.14	NCOA7	-0.175387	0.0116212
ENSG00000141027.16	NCOR1	-0.419521	2.16617e-19
ENSG00000188211.4	NCR3LG1	-0.699364	9.1017e-54
ENSG00000058804.10	NDC1	-0.225215	8.25026e-09
ENSG00000072864.8	NDE1	-0.241064	1.76343e-05
ENSG00000131507.9	NDFIP1	-0.422505	9.91801e-07
ENSG00000101079.16	NDRG3	0.225186	0.0140567
ENSG00000070614.10	NDST1	-1.14058	0.000282506
ENSG00000130414.7	NDUFA10	0.180848	0.000173077
ENSG00000178057.10	NDUFAF3	-0.163242	0.0325
ENSG00000003509.11	NDUFAF7	-0.173691	0.0398156
ENSG00000147123.10	NDUFB11	0.111619	0.0346034
ENSG00000065518.7	NDUFB4	0.182316	0.0386009
ENSG00000136521.8	NDUFB5	-0.152369	0.0161666
ENSG00000099795.2	NDUFB7	0.218978	0.000136982
ENSG00000109390.7	NDUFC1	-0.185106	0.0134866
ENSG00000115286.15	NDUFS7	0.241761	0.000491966
ENSG00000110717.6	NDUFS8	0.197162	0.000858752
ENSG00000167792.7	NDUFV1	0.167833	7.91594e-06
ENSG00000160194.13	NDUFV3	0.555277	2.44507e-17
ENSG00000183091.15	NEB	-0.460527	0.0352977
ENSG00000125967.12	NECAB3	-0.435398	0.000441927
[truncated: 1,610 more rows]
