# Supplementary material for: MYC regulates ribosome biogenesis and mitochondrial gene expression programs through its interaction with host cell factor–1
Source: eLife. 2021 Jan 8;10:e60191. doi: 10.7554/eLife.60191 (PMC7793627; doi:10.7554/eLife.60191)
Supplement: Figure 3—source data 3. [file elife-60191-fig3-data3.xlsx]

## Sheet: Sheet1
HGNC	4A_24hr log2FC	VP_24hr log2FC	Cluster (4A/VP)
SH2D1A	-10.5245	-3.60214	1
ZAP70	-7.6661	-4.33183	1
TENM1	-6.45339	-1.15319	1
GYPC	-6.02818	-1.57506	1
PRXL2A	-5.83168	-5.49609	1
NUP62CL	-5.52881	-5.19323	1
ARL9	-5.34219	-0.667503	1
MOXD1	-5.2108	-2.19431	1
HSD17B11	-4.86659	-7.11977	1
MKS1	-4.66802	-4.82832	1
SLC16A10	-4.63377	-0.604011	1
SMO	-4.56285	-0.935461	1
PLEKHF1	-4.47261	-2.74123	1
HMCN1	-4.42007	-4.26921	1
PPM1E	-4.3886	-3.52716	1
PYHIN1	-4.31266	-2.65983	1
C20orf194	-4.15251	-4.47931	1
PROSER2	-4.09831	-1.1292	1
ITGAV	-4.03452	-1.88133	1
PDE9A	-4.01512	-2.48318	1
FRMD6	-3.87281	-2.21559	1
SPSB1	-3.44941	-1.6157	1
CEMIP2	-3.20393	-0.721021	1
ENAH	-3.082	-0.608589	1
HEATR6	-3.0476	-2.03149	1
ECE1	-3.04573	-1.68405	1
EPS8L2	-3.01514	-0.722822	1
NLRP1	-2.97282	-1.16685	1
GRB7	-2.84834	-2.94045	1
MX2	-2.83243	-2.26535	1
SLC5A5	-2.80456	-2.13835	1
NPTX1	-2.71445	-4.19601	1
SUSD1	-2.60575	-1.06596	1
FOXJ2	-2.56659	-1.12178	1
SLC2A9	-2.43876	-0.603079	1
ZFP82	-2.42771	-5.0933	1
EPB41L5	-2.41374	-0.57049	1
HPDL	-2.35855	-3.28688	1
PTK7	-2.34419	-3.24716	1
ATP1B1	-2.33025	-1.25634	1
PDE4D	-2.27036	-5.8625	1
SHISA8	-2.20832	-1.50673	1
IRAK2	-2.18956	-1.11751	1
FGFR1	-2.16097	-3.52654	1
CD82	-2.15573	-3.19035	1
HSPB1	-2.13689	-1.86367	1
DENND2C	-2.03134	-1.21025	1
SLC8A1	-2.02794	-1.47805	1
NOTCH2	-1.96806	-2.42657	1
MAP1A	-1.9612	-1.40297	1
SOX13	-1.96071	-2.69848	1
SMIM10	-1.94595	-1.51654	1
SPECC1	-1.94077	-2.79947	1
RRAS2	-1.90244	-1.40884	1
ARHGAP23	-1.77359	-0.716305	1
DAB2IP	-1.73597	-3.5113	1
BCAR1	-1.73218	-1.00563	1
DLG2	-1.70772	-0.711459	1
SPEF2	-1.68699	-3.76608	1
FGR	-1.68675	-1.10131	1
SPRY1	-1.63502	-1.25247	1
CHI3L2	-1.60343	-2.15212	1
ZFYVE9	-1.58379	-2.3128	1
FURIN	-1.55624	-1.54784	1
CPLANE1	-1.53051	-1.53971	1
ASB13	-1.52375	-0.700516	1
TTYH3	-1.51747	-1.28133	1
PCDHGB4	-1.49276	-2.06241	1
AC023590.1	-1.48913	-1.39734	1
TLL2	-1.46733	-1.16937	1
SELENON	-1.46529	-0.929382	1
ALPK3	-1.45216	-1.31395	1
TEC	-1.40498	-0.474007	1
DOK4	-1.39514	-1.18441	1
LRRC32	-1.38605	-0.73317	1
ZSCAN12	-1.38219	-0.823198	1
GNAZ	-1.36864	-0.28964	1
SUOX	-1.35817	-1.24468	1
HTATIP2	-1.35665	-2.0672	1
SETBP1	-1.3533	-0.79259	1
CCDC112	-1.32806	-0.357153	1
PLEKHO1	-1.31483	-1.65525	1
AIF1	-1.3083	-2.19467	1
TSKU	-1.3072	-1.41967	1
JMY	-1.28825	-0.387949	1
MAB21L1	-1.24173	-2.69965	1
AGMAT	-1.23717	-1.86042	1
LDLRAP1	-1.23265	-0.628567	1
COTL1	-1.23081	-0.257901	1
PLAC8	-1.22374	-1.3944	1
P2RY10	-1.20801	-0.762039	1
IL2RA	-1.13817	-0.975411	1
FERMT3	-1.13097	-0.240581	1
FGF12	-1.11757	-0.384937	1
SMAD6	-1.11094	-1.3706	1
ARPP21	-1.10248	-0.716155	1
TRPV2	-1.03943	-0.480445	1
ID1	-1.02663	-1.05659	1
PTK2	-1.02023	-0.348583	1
PRDM11	-1.00033	-0.680102	1
SLC4A10	-0.966718	-3.87345	1
RDX	-0.964761	-3.58622	1
ZXDA	-0.957654	-0.496389	1
RASSF6	-0.937186	-0.649813	1
ZNF22	-0.931339	-8.81651	1
KHDRBS3	-0.910999	-1.28549	1
NSUN7	-0.904683	-2.37882	1
ITGAL	-0.903321	-0.112868	1
ZNF486	-0.880091	-1.00359	1
MRFAP1L1	-0.868994	-0.15243	1
ZNF827	-0.853921	-0.369688	1
TMEM144	-0.828123	-5.19726	1
NME4	-0.810799	-1.62786	1
CRIM1	-0.810252	-0.215295	1
OAT	-0.797169	-0.759911	1
LACC1	-0.795777	-0.168251	1
USP46	-0.791222	-0.405567	1
PAG1	-0.790405	-0.287594	1
SMAD7	-0.763717	-2.11783	1
DGAT2	-0.75468	-0.51366	1
MAPK11	-0.752421	-2.3055	1
SYTL2	-0.750234	-0.929689	1
KHDRBS2	-0.745129	-4.96742	1
GASK1B	-0.740476	-4.03593	1
GINS3	-0.738053	-0.350277	1
TNFRSF21	-0.736738	-1.49135	1
CD53	-0.72826	-0.575484	1
PTPRG	-0.717749	-5.75841	1
ICA1L	-0.713161	-0.506758	1
GBE1	-0.71286	-0.437567	1
APBB1	-0.71119	-1.75006	1
ABHD17B	-0.710571	-0.300107	1
STAT5A	-0.688768	-0.686332	1
GAREM2	-0.687447	-0.894858	1
MEGF11	-0.686559	-0.613407	1
EIF2AK4	-0.683495	-0.26186	1
GPR157	-0.681731	-0.463227	1
ZNF496	-0.6783	-0.361646	1
VCL	-0.67424	-0.479466	1
LIMA1	-0.673542	-0.449588	1
TCP11L2	-0.668452	-0.946651	1
PAQR8	-0.656553	-0.890969	1
GABARAPL1	-0.642472	-0.196761	1
MACF1	-0.64083	-0.636579	1
CA8	-0.640356	-6.9837	1
SLC41A2	-0.640239	-0.923857	1
CORO6	-0.638244	-1.03472	1
RGS3	-0.635898	-0.24344	1
PITPNM2	-0.62501	-0.909965	1
ABCG1	-0.617846	-0.59066	1
SLC35G1	-0.605062	-0.918283	1
AHDC1	-0.603367	-0.642865	1
DPYD	-0.598667	-0.292306	1
NEK6	-0.593621	-0.823264	1
SAMD4A	-0.585822	-0.574939	1
AEBP1	-0.583903	-0.699876	1
ARAP2	-0.572511	-0.277029	1
NCF4	-0.57047	-0.892722	1
PPFIA4	-0.551634	-1.17928	1
FADS3	-0.549221	-0.409356	1
ARL4A	-0.546757	-0.599071	1
CCNI2	-0.535623	-2.92903	1
DOCK9	-0.532965	-0.301532	1
CNN2	-0.532758	-0.133503	1
TMEM159	-0.532388	-0.279909	1
SOBP	-0.528734	-0.562813	1
B3GLCT	-0.514818	-0.283353	1
CES3	-0.513986	-0.567013	1
LRP4	-0.511252	-0.389123	1
CKAP4	-0.511133	-0.716564	1
CXXC5	-0.499137	-0.277918	1
ARHGAP9	-0.498533	-0.438463	1
ERO1B	-0.497305	-0.182979	1
SESTD1	-0.489257	-0.300099	1
LAMP2	-0.488944	-0.191638	1
CRACD	-0.48687	-0.640044	1
REC8	-0.481885	-0.760438	1
NBPF14	-0.481815	-0.333473	1
KIFAP3	-0.47345	-0.937778	1
TASOR2	-0.471851	-0.268949	1
MLLT3	-0.470799	-0.592753	1
ANO9	-0.460246	-0.505017	1
LRRC20	-0.454653	-0.284716	1
OGFRL1	-0.453799	-0.222062	1
IFT57	-0.451628	-0.156622	1
COL9A2	-0.450132	-0.29962	1
SMIM11A	-0.441261	-0.834551	1
TUBB2A	-0.440411	-0.295702	1
TNFRSF10D	-0.436495	-1.32103	1
PFKFB3	-0.435538	-0.22423	1
CGN	-0.43431	-0.433044	1
TRIB3	-0.43295	-0.245378	1
USP53	-0.430368	-0.235848	1
CNR1	-0.430012	-0.814174	1
TET1	-0.426772	-8.26699	1
SEMA4A	-0.425139	-0.135974	1
IL10RA	-0.42184	-0.799941	1
TNKS1BP1	-0.416724	-0.341632	1
EMB	-0.414445	-0.116222	1
CD19	-0.413155	-0.273396	1
TMED8	-0.410902	-0.228303	1
TMX4	-0.406379	-0.16534	1
SEPTIN11	-0.40581	-0.208458	1
ARL6	-0.403885	-0.308298	1
TSR1	-0.397665	-0.131231	1
STOM	-0.394969	-0.71018	1
ATG4C	-0.390053	-0.348981	1
B3GNT2	-0.379116	-0.2583	1
DOCK8	-0.37769	-0.541542	1
RAB8B	-0.373616	-0.279873	1
TUBA4A	-0.372036	-0.166699	1
OCIAD2	-0.369334	-0.38855	1
CYP27B1	-0.36873	-0.834451	1
PLIN3	-0.356468	-0.158152	1
TRAF5	-0.354181	-0.127933	1
CAPN1	-0.352287	-0.173409	1
PRKACB	-0.351966	-0.248336	1
JUNB	-0.35061	-0.232846	1
CDKL1	-0.349423	-0.358411	1
SNX30	-0.345715	-0.242621	1
MAFK	-0.343028	-0.208959	1
JADE3	-0.336861	-0.390294	1
DEGS2	-0.334396	-2.35953	1
ABCA1	-0.333473	-0.1281	1
FTO	-0.333147	-0.219209	1
MEAK7	-0.333091	-0.481042	1
KANK2	-0.331548	-0.435085	1
RBM18	-0.329659	-0.243894	1
PTPN7	-0.329626	-0.290368	1
GIT1	-0.329088	-0.38935	1
ID4	-0.325019	-0.382879	1
MSANTD4	-0.323313	-0.150312	1
IRF8	-0.315556	-0.213966	1
QSOX1	-0.313517	-0.53163	1
ATXN7L1	-0.310477	-0.472896	1
SLC43A2	-0.305141	-0.162147	1
REEP5	-0.303997	-0.162372	1
AHR	-0.303641	-0.267355	1
CLECL1	-0.296746	-0.531663	1
ENC1	-0.295478	-0.707043	1
EBPL	-0.295276	-0.425225	1
TBC1D2B	-0.295225	-0.207712	1
C1orf122	-0.293029	-0.357224	1
ZXDB	-0.292862	-0.525693	1
NR3C1	-0.292786	-0.482874	1
ADAL	-0.290497	-0.585183	1
ACAT1	-0.288594	-0.515766	1
HGSNAT	-0.28609	-0.345743	1
TFAM	-0.285078	-0.13691	1
NANP	-0.282672	-0.238881	1
CDK6	-0.276786	-0.828513	1
TERF2	-0.276631	-0.203697	1
ARHGEF6	-0.275976	-0.397925	1
MPP7	-0.274068	-0.326443	1
PACSIN1	-0.272474	-0.360023	1
GCAT	-0.272197	-0.49555	1
NT5C3A	-0.270098	-0.280202	1
GRK2	-0.268191	-0.337211	1
CEP68	-0.267822	-0.376832	1
TARS3	-0.265769	-0.332808	1
ANKRD13B	-0.264897	-0.580341	1
BIK	-0.263222	-0.725954	1
SLC25A46	-0.262157	-0.14956	1
LYAR	-0.261812	-0.125956	1
SPTLC2	-0.259959	-0.280991	1
ENDOG	-0.259365	-0.377598	1
SLC15A4	-0.258409	-0.239881	1
RALBP1	-0.257359	-0.307122	1
RGS14	-0.257159	-0.28786	1
ATP13A3	-0.256614	-0.253051	1
FAM78A	-0.254241	-0.226714	1
RUNDC1	-0.253532	-0.176585	1
GAMT	-0.252904	-0.263843	1
RSL1D1	-0.252131	-0.113714	1
KIAA1109	-0.251283	-0.223528	1
CHCHD4	-0.249907	-0.189986	1
LPIN1	-0.248712	-0.413875	1
RTKN2	-0.247263	-0.22991	1
TMEM14C	-0.246696	-1.30134	1
YWHAB	-0.245905	-0.151071	1
EHD1	-0.24561	-0.252913	1
AMZ2	-0.245255	-0.137029	1
APAF1	-0.244344	-0.184287	1
LPXN	-0.244112	-0.1348	1
LIMS1	-0.243275	-0.413265	1
TP53BP1	-0.236844	-0.105521	1
SARM1	-0.236754	-0.628202	1
SSH2	-0.235844	-0.148258	1
ACAA2	-0.232659	-0.295044	1
MAD1L1	-0.232649	-0.135419	1
STK4	-0.230219	-0.218546	1
SMTN	-0.228992	-0.412977	1
GSPT1	-0.228786	-0.0910021	1
AICDA	-0.227943	-0.787637	1
CEP295	-0.227567	-0.146736	1
ARL15	-0.22697	-0.43379	1
TSPO	-0.224456	-0.617115	1
DHFR	-0.223031	-0.197366	1
SBF1	-0.222742	-0.127896	1
CNST	-0.222609	-0.161278	1
GCNT1	-0.222485	-0.497633	1
MYO1D	-0.222254	-0.348931	1
GMFB	-0.222203	-0.273665	1
TSPAN17	-0.221503	-0.228404	1
MGST1	-0.221061	-0.469704	1
CEBPZ	-0.219012	-0.146198	1
CERK	-0.217987	-0.441682	1
TRO	-0.217513	-0.224834	1
SLC8B1	-0.216825	-0.384553	1
TMEM243	-0.216816	-0.224456	1
FUT11	-0.216725	-0.390803	1
NARF	-0.216595	-0.317037	1
SLC19A1	-0.216468	-1.56329	1
FNIP1	-0.213975	-0.209819	1
SPIB	-0.211308	-0.214086	1
MCOLN2	-0.210602	-0.130855	1
OFD1	-0.209547	-0.152656	1
RAPGEF5	-0.207257	-0.186148	1
DNAJC6	-0.20645	-0.324398	1
C1orf112	-0.205425	-0.38688	1
HLTF	-0.204689	-0.209939	1
CAPZA1	-0.203887	-0.315811	1
GCC2	-0.19899	-0.173965	1
RPL31	-0.198656	-0.243934	1
HIGD1A	-0.198343	-0.294863	1
CIBAR2	-0.19817	-1.31583	1
PNPLA8	-0.197877	-0.157993	1
SHLD2	-0.19751	-0.284612	1
LRRC8D	-0.197436	-0.303497	1
CORO1A	-0.197277	-0.173439	1
PSMB5	-0.19538	-0.20912	1
CAB39L	-0.194664	-1.47213	1
DESI2	-0.193597	-0.242732	1
JAK1	-0.193475	-0.427316	1
SLC35E3	-0.191393	-0.136147	1
SACS	-0.191154	-0.708224	1
VPS13A	-0.188498	-0.254879	1
MYB	-0.187939	-0.377867	1
SYNE1	-0.184007	-0.335409	1
ACTG1	-0.183596	-0.164508	1
RAB1A	-0.18359	-0.173867	1
PTK2B	-0.18216	-0.195634	1
GNPNAT1	-0.182084	-0.315847	1
ESR1	-0.181732	-0.343951	1
RAP1B	-0.178947	-0.195121	1
ALCAM	-0.178318	-0.172381	1
BICD1	-0.177831	-0.209423	1
RASSF2	-0.177704	-0.178326	1
ZBTB2	-0.176624	-0.211854	1
PPP1R15A	-0.175146	-0.582138	1
WDR36	-0.173465	-0.147864	1
PSMC1	-0.172246	-0.114046	1
PUM3	-0.171307	-0.142659	1
LNPEP	-0.169356	-0.318926	1
LPP	-0.168295	-0.238903	1
RAVER2	-0.16813	-0.9995	1
THAP4	-0.168039	-0.239966	1
PNKD	-0.167995	-0.208649	1
RABGAP1L	-0.167597	-0.251206	1
FBXO30	-0.167363	-0.401486	1
MSN	-0.167062	-2.63581	1
OXCT1	-0.165183	-0.376366	1
RBPJ	-0.164136	-0.118858	1
RBM38	-0.163469	-0.128712	1
NAA50	-0.162701	-0.168685	1
PLAA	-0.161937	-0.133732	1
ILRUN	-0.161161	-0.31767	1
ATP6V0B	-0.160869	-0.18296	1
PNP	-0.160865	-0.20326	1
PAPSS1	-0.160658	-0.278444	1
TUBB4B	-0.160186	-0.221595	1
ISOC2	-0.158572	-0.189964	1
G3BP1	-0.158549	-0.130897	1
NET1	-0.157726	-0.241481	1
C9orf40	-0.156642	-0.250251	1
SELENOT	-0.155361	-0.134396	1
LBR	-0.15508	-0.153924	1
PIK3CG	-0.15471	-0.202979	1
METAP2	-0.154451	-0.723081	1
ANKRD13A	-0.152806	-0.393876	1
LTBP1	-0.152348	-0.755308	1
OS9	-0.152314	-0.223474	1
PTPRC	-0.150872	-0.241636	1
IARS2	-0.150261	-0.150777	1
KIF3A	-0.14894	-0.134754	1
RAP1GDS1	-0.146976	-0.378571	1
NSF	-0.146382	-0.18148	1
DUS3L	-0.145814	-0.275218	1
NADSYN1	-0.14533	-0.148872	1
PPP1R16B	-0.143989	-0.30258	1
ADD3	-0.143678	-0.27062	1
AHCTF1	-0.142903	-0.163081	1
HDLBP	-0.142478	-0.110865	1
SGPP1	-0.139789	-0.451501	1
CTNNB1	-0.13901	-0.148364	1
ARPC1B	-0.137772	-0.189407	1
DUT	-0.137463	-0.133801	1
MAPRE2	-0.135199	-0.366977	1
AMFR	-0.13493	-0.546064	1
RNF145	-0.13365	-0.188507	1
UBQLN1	-0.133463	-0.666735	1
RPS6KB1	-0.133025	-0.146164	1
PFAS	-0.132171	-0.259269	1
INPP5B	-0.131003	-0.156136	1
SMAD5	-0.130333	-1.05185	1
FTL	-0.130256	-0.468056	1
KPNA2	-0.130202	-0.0898009	1
ATL2	-0.129883	-0.210867	1
BZW2	-0.127353	-0.155504	1
HMCES	-0.127299	-0.342619	1
CBX6	-0.12707	-0.861499	1
ITSN2	-0.126926	-0.200831	1
STAG2	-0.125748	-0.319991	1
NAA15	-0.125347	-0.134149	1
TRABD	-0.123917	-0.0979822	1
HDAC1	-0.122524	-0.236093	1
MFSD14B	-0.121031	-0.359768	1
SETDB2	-0.120133	-0.315317	1
TRAF4	-0.1178	-0.141047	1
TRIP12	-0.115852	-0.198031	1
MME	-0.113249	-0.291099	1
RRP1B	-0.112581	-0.133117	1
GNL3	-0.112546	-0.135604	1
STARD7	-0.111846	-0.104966	1
MFAP1	-0.111728	-0.146839	1
FAM53B	-0.111513	-0.423977	1
TJP2	-0.110486	-0.264103	1
PKM	-0.109526	-0.077258	1
TBC1D4	-0.109005	-0.62527	1
SERBP1	-0.108654	-0.145435	1
PUS7	-0.107901	-0.213548	1
KIF2A	-0.10781	-0.128791	1
UBE2H	-0.106165	-0.168211	1
PPP2R1B	-0.104763	-0.111345	1
TNPO1	-0.104061	-0.159093	1
LYN	-0.102621	-0.189809	1
SPTAN1	-0.102447	-0.209207	1
GINS2	-0.100782	-0.168711	1
GGA2	-0.100261	-0.252907	1
SLC2A1	-0.0992551	-0.159336	1
BUB1	-0.0984731	-0.158215	1
CDC20	-0.0974676	-0.16919	1
SLC44A1	-0.0921328	-0.137881	1
PARP1	-0.0747431	-0.117337	1
GSTP1	-0.073856	-0.187895	1
TTC24	-5.86274	0.549358	2
INF2	-5.55648	1.11307	2
ZNF695	-5.46496	0.816328	2
SPINT1	-5.05424	1.10146	2
GFI1	-4.62533	0.873838	2
SLC25A43	-4.44348	0.875377	2
IVD	-4.06055	0.826224	2
CKMT1B	-4.03665	1.09597	2
NAPSA	-3.71189	0.582618	2
ABHD17C	-3.64664	0.67638	2
CKMT1A	-3.53618	1.29476	2
UNC5C	-3.44006	0.665682	2
CLEC17A	-3.2041	1.23944	2
FAM124A	-3.13158	2.73263	2
ARHGAP21	-3.12636	4.92166	2
PATJ	-2.96941	2.25766	2
BATF	-2.9621	1.97573	2
TMCO4	-2.771	1.09182	2
RGS8	-2.74885	1.9805	2
LRATD2	-2.68995	1.20496	2
STYK1	-2.67512	1.06069	2
CYTH4	-2.6544	0.957927	2
TRIM44	-2.55474	2.18542	2
H4C13	-2.47041	0.722757	2
GPRIN3	-2.40386	0.771643	2
CD180	-2.28425	0.444179	2
IL7R	-2.13427	1.8312	2
RIPOR3	-2.1137	1.49203	2
ITGA3	-2.07864	0.34924	2
APOBEC3C	-2.0188	0.285537	2
DIP2C	-1.92459	1.29827	2
PLEKHA6	-1.9241	1.59543	2
LARGE2	-1.9217	0.685278	2
TNFRSF8	-1.91088	3.15384	2
OSBP2	-1.89978	0.742692	2
PPARA	-1.88409	0.529312	2
MAST4	-1.86022	0.492738	2
APOBEC3D	-1.79089	0.373582	2
CASP4	-1.77688	2.71413	2
NOS3	-1.73195	1.21818	2
PRKX	-1.73013	0.790406	2
SGK1	-1.72103	1.05588	2
NMI	-1.71491	1.44147	2
ICAM3	-1.70845	0.342188	2
HES1	-1.68683	1.41668	2
MAGI3	-1.61502	0.57851	2
SPOCK2	-1.5559	0.424579	2
OPRL1	-1.54887	0.634123	2
BSPRY	-1.54292	1.30012	2
APOBEC3B	-1.50904	0.921994	2
SPTBN1	-1.48825	0.917527	2
KCNJ2	-1.46658	1.19112	2
GAS2L3	-1.46517	0.565614	2
RNASET2	-1.4649	0.35566	2
LBH	-1.358	2.15425	2
LFNG	-1.35542	1.21806	2
NLRP7	-1.2818	1.10703	2
SMS	-1.21146	0.136151	2
HEMGN	-1.19242	1.00842	2
SPR	-1.15494	0.880037	2
RASSF5	-1.15366	0.50154	2
SLC22A18	-1.09633	0.463746	2
CBR1	-1.04028	2.07612	2
MAN2A2	-1.02389	0.359803	2
VASH2	-0.978699	1.20036	2
STX3	-0.969733	0.646374	2
EOGT	-0.9675	1.44132	2
PGM2L1	-0.94039	0.761337	2
RASGRP1	-0.92489	0.700822	2
OVOL2	-0.8945	0.482638	2
H2BC18	-0.890731	0.416876	2
TRMT1	-0.878712	1.00901	2
CAMP	-0.87237	0.921765	2
SERINC2	-0.853313	0.662038	2
HRK	-0.828829	0.625315	2
TMC8	-0.825757	0.420363	2
TNFAIP2	-0.810771	0.854241	2
ENPP5	-0.779626	0.551245	2
CDC42BPG	-0.777089	0.663778	2
LAT2	-0.77405	0.350649	2
ARHGEF3	-0.766869	0.622415	2
RASA4	-0.748804	0.20164	2
TRAF3IP3	-0.727283	0.534084	2
VAV2	-0.725206	0.557618	2
RCBTB2	-0.711833	0.251491	2
SLC4A11	-0.708559	0.484371	2
TSPAN33	-0.704662	0.343721	2
ZBTB7B	-0.67154	0.297522	2
NOL6	-0.667143	0.469002	2
MEST	-0.657008	0.194246	2
KLHL23	-0.629269	0.550629	2
LTB	-0.626329	0.2446	2
MTMR6	-0.62158	0.419322	2
UTP15	-0.620878	0.277199	2
HPCAL1	-0.617515	0.506676	2
S1PR4	-0.612122	0.260339	2
ASB2	-0.605515	0.551207	2
POU4F1	-0.587896	0.882694	2
TWNK	-0.583052	0.186065	2
PES1	-0.578914	0.259704	2
GRK6	-0.571307	0.209663	2
DPH1	-0.565239	0.785311	2
RRP12	-0.562825	0.30443	2
ST3GAL1	-0.560957	1.0169	2
DGKA	-0.55329	0.25118	2
UTP20	-0.543099	0.579054	2
QTRT1	-0.538665	0.447259	2
MARS2	-0.538281	0.19639	2
RRP15	-0.53764	0.287988	2
CD3EAP	-0.534831	0.306051	2
SERPINB9	-0.531269	0.528564	2
NR1D2	-0.527298	0.526584	2
PDK2	-0.526402	0.372467	2
RRP9	-0.524299	0.685529	2
TRAF1	-0.517158	0.25119	2
IDH2	-0.508602	0.755386	2
SIX1	-0.505237	0.719004	2
SLC25A29	-0.505126	0.43873	2
PNPT1	-0.498384	0.237086	2
SSBP4	-0.495432	0.245847	2
NOC2L	-0.493077	0.314278	2
CCDC86	-0.49078	0.298928	2
RPF2	-0.470614	0.193995	2
PLA2G12A	-0.470514	0.151182	2
DHX33	-0.470094	0.176867	2
DEPDC1	-0.469839	0.200834	2
PPP1R18	-0.469157	0.216253	2
DDX51	-0.466429	0.209957	2
EMC10	-0.465791	0.282826	2
DPH2	-0.464928	0.304471	2
TGFBR2	-0.463943	0.224124	2
ST8SIA1	-0.46216	0.489496	2
SCFD2	-0.461702	0.432485	2
TPM4	-0.461374	0.341971	2
TTC27	-0.458245	0.419218	2
PDCD11	-0.45635	0.154747	2
NHP2	-0.453796	0.316718	2
CTU2	-0.448507	0.66869	2
POLR3E	-0.448078	0.253236	2
SF3A3	-0.448025	0.216188	2
NSUN6	-0.444869	0.251104	2
H3C13	-0.440147	0.440452	2
TRIAP1	-0.438515	0.206104	2
HS6ST1	-0.438225	0.789991	2
MIPEP	-0.436387	0.347104	2
TRMT61A	-0.433137	0.4608	2
ADAM15	-0.431866	0.235212	2
EXOSC5	-0.430872	0.414255	2
C8orf33	-0.428214	0.124272	2
ATP5MC1	-0.427945	0.292992	2
CBWD5	-0.42696	0.385402	2
RUVBL1	-0.42606	0.124284	2
EMC1	-0.425129	0.344778	2
CBWD3	-0.425109	0.39644	2
HK1	-0.424184	0.207361	2
VPREB3	-0.420724	0.655397	2
ECE2	-0.418883	0.494205	2
ESCO1	-0.417193	0.232309	2
CBWD6	-0.416087	0.40639	2
DOP1A	-0.415757	0.228499	2
SPINT2	-0.414671	0.441972	2
CBWD6	-0.414466	0.410599	2
DCAF13	-0.412402	0.250761	2
CYP2U1	-0.412156	0.159971	2
UBE2G2	-0.412047	0.303946	2
SBF2	-0.410554	0.210389	2
RPGRIP1L	-0.409945	0.275438	2
MRPL45	-0.408882	0.227785	2
HEATR1	-0.40832	0.228381	2
PRMT5	-0.408227	0.260673	2
LRPPRC	-0.404111	0.443456	2
LTV1	-0.401221	0.181793	2
CSRP1	-0.39933	0.185586	2
SURF6	-0.39385	0.19263	2
PTPRE	-0.390925	0.446577	2
CREG1	-0.39055	0.14775	2
PTPN18	-0.387733	0.152795	2
TRMT61B	-0.385897	0.253955	2
NOC4L	-0.381426	0.216986	2
CARD11	-0.380051	0.202352	2
CCDC58	-0.379348	0.221303	2
LAMTOR5	-0.376141	0.245997	2
DUS4L	-0.37546	0.20665	2
SYTL1	-0.372847	0.295094	2
RUVBL2	-0.372721	0.16837	2
CBWD1	-0.372708	0.388308	2
PER2	-0.372649	0.391556	2
CBWD2	-0.371183	0.358745	2
EIF2S1	-0.371094	0.239807	2
SUPV3L1	-0.370856	0.210028	2
OAS2	-0.368974	0.420422	2
ZNHIT6	-0.368042	0.142623	2
NUFIP1	-0.366752	0.286692	2
SPATA13	-0.364381	0.222507	2
LSM7	-0.36273	0.12794	2
TOMM40	-0.362442	0.123181	2
RGCC	-0.361443	0.268877	2
DDX10	-0.359926	0.250625	2
BCCIP	-0.358806	0.275098	2
MORC3	-0.358545	0.151171	2
CHEK2	-0.3571	0.167294	2
RTL10	-0.354171	0.150885	2
SH2D3A	-0.35244	0.197677	2
PHB	-0.352397	0.278574	2
PRXL2C	-0.349101	0.446308	2
NUDCD1	-0.347601	0.179016	2
E2F4	-0.347534	0.226704	2
PNO1	-0.345656	0.168111	2
MRPS12	-0.344938	0.249955	2
LMO7	-0.344006	0.218092	2
GPX1	-0.342005	0.17125	2
RPL7L1	-0.340133	0.154518	2
GTF2H3	-0.339362	0.277861	2
PRMT2	-0.338985	0.375342	2
MAX	-0.338304	0.170725	2
MDN1	-0.337529	0.166329	2
RP9	-0.334303	0.248318	2
PLEKHB2	-0.333756	0.13152	2
PINX1	-0.333064	0.207694	2
NOP9	-0.33191	0.16316	2
WDR3	-0.331797	0.423432	2
TWISTNB	-0.330394	0.322333	2
ABCA7	-0.329473	0.183609	2
ZNF75A	-0.329182	0.396756	2
CMSS1	-0.326325	0.337767	2
NAT10	-0.32564	0.138975	2
CLCN4	-0.32496	0.61407	2
DPH5	-0.324924	0.244267	2
SAMM50	-0.32453	0.271634	2
UCHL3	-0.323594	0.206197	2
ACSS2	-0.323177	0.373832	2
CARMIL2	-0.320671	0.293496	2
TACC1	-0.320454	0.422293	2
APOBEC3G	-0.317433	0.443212	2
NGDN	-0.316604	0.275133	2
XPO6	-0.316543	0.145893	2
FLAD1	-0.316305	0.427863	2
TRMT13	-0.315399	0.478027	2
IPO11	-0.314797	0.143773	2
CHID1	-0.313948	0.357321	2
CLNS1A	-0.313574	0.192998	2
MRPS17	-0.312844	0.491944	2
GFM1	-0.312027	0.276259	2
CRLS1	-0.311533	0.174934	2
ALDH18A1	-0.311044	0.14087	2
MPV17	-0.308991	0.310709	2
SMN1	-0.307861	0.399235	2
PARD6B	-0.307775	0.384003	2
POLR3A	-0.307515	0.244726	2
EXOC2	-0.307383	0.169294	2
IKZF2	-0.306114	0.257914	2
C9orf78	-0.304244	0.161823	2
MECR	-0.299463	0.561008	2
BMS1	-0.29695	0.153451	2
ABCF2	-0.294625	0.40788	2
PACS2	-0.293896	0.263312	2
CYCS	-0.293797	0.116458	2
UBFD1	-0.293595	0.167605	2
SMN2	-0.292187	0.396637	2
FTSJ3	-0.290289	0.304794	2
POLE3	-0.289653	0.132281	2
CLPB	-0.287009	0.237067	2
FBL	-0.286307	0.198536	2
DHX37	-0.284741	0.166197	2
ENDOD1	-0.282668	0.157168	2
AFMID	-0.281413	0.508869	2
ATP13A2	-0.281049	0.21769	2
FAM156B	-0.280881	0.220892	2
FAM156A	-0.280839	0.253613	2
POLR1A	-0.278842	0.285723	2
UBXN11	-0.27842	0.178857	2
PMPCA	-0.277899	0.136425	2
INTS6	-0.277561	0.129317	2
MTX3	-0.277184	0.178823	2
SSBP1	-0.274644	0.202389	2
RARS1	-0.273218	0.212953	2
PCYOX1L	-0.272512	0.225863	2
WDR18	-0.271515	0.611221	2
NLE1	-0.269923	0.151432	2
NAA35	-0.269849	0.182393	2
PGAM5	-0.267872	0.212543	2
TCTA	-0.267796	0.553035	2
EIF3B	-0.267314	0.129667	2
TRMT6	-0.266581	0.233375	2
RBM19	-0.26479	0.6782	2
BRAT1	-0.264773	0.253875	2
FAAP100	-0.264185	0.166635	2
NARS1	-0.262744	0.0975783	2
GADD45GIP1	-0.261413	0.524978	2
EIF2B2	-0.260814	0.245388	2
GON7	-0.260657	0.277531	2
HTATSF1	-0.259595	0.141888	2
ATM	-0.259276	0.219371	2
TIMM23	-0.259108	0.136342	2
ALG3	-0.258268	0.283537	2
ANKRD28	-0.25729	0.119099	2
KLHL18	-0.256837	0.11725	2
MOAP1	-0.256649	0.273239	2
RAC2	-0.255818	0.638565	2
NOL8	-0.255684	0.115636	2
BDH1	-0.255424	0.198705	2
CCT3	-0.254923	0.0868579	2
ZNF121	-0.254609	0.228502	2
RPUSD2	-0.254377	0.487809	2
ZNF860	-0.253958	0.245399	2
QRSL1	-0.252856	0.160906	2
RPL27	-0.252329	0.237395	2
LSG1	-0.2519	0.197199	2
NCBP1	-0.251703	0.216317	2
TBL3	-0.251585	0.208767	2
CCDC25	-0.250814	0.167734	2
SNRNP40	-0.249619	0.211849	2
TSN	-0.249251	0.192783	2
DGKI	-0.24846	0.334826	2
TIMM10	-0.247644	0.156724	2
NEURL4	-0.246493	0.299834	2
UBAC2	-0.246109	0.217433	2
DDX19A	-0.245756	0.215731	2
DCUN1D5	-0.245232	0.187818	2
SIT1	-0.244892	0.174677	2
TYW1	-0.244075	0.433561	2
EIF2B1	-0.243278	0.434819	2
SERPINB1	-0.242926	0.260707	2
PSMD6	-0.242125	0.106062	2
PWP1	-0.241863	0.181732	2
NOL10	-0.239647	0.267657	2
SNRPF	-0.23923	0.133905	2
MRPS35	-0.238961	0.34571	2
ABHD14B	-0.238372	0.229245	2
MTRF1	-0.236083	0.373634	2
HMOX2	-0.234963	0.176246	2
URB1	-0.234958	0.281161	2
PSME3	-0.234397	0.127478	2
MRM1	-0.234216	0.164448	2
NOM1	-0.232253	0.11554	2
PPP1R12B	-0.231956	0.182983	2
FBXL14	-0.230799	0.168379	2
SLC39A3	-0.229869	0.224692	2
CLSTN3	-0.229868	0.300137	2
SETD6	-0.227044	0.177842	2
DDX50	-0.226505	0.1338	2
PPIH	-0.226124	0.143017	2
POLR2E	-0.226087	0.229022	2
REXO4	-0.225908	0.265771	2
SLC12A9	-0.223226	0.4172	2
TCTN3	-0.22311	0.409048	2
ZPR1	-0.222217	0.301782	2
LAS1L	-0.221878	0.436006	2
SDAD1	-0.221583	0.19431	2
CCT6A	-0.221341	0.0886507	2
DDI2	-0.220091	0.111102	2
PHF14	-0.218228	0.243982	2
OPA1	-0.217099	0.0956397	2
PFKP	-0.216256	0.100372	2
EIF5B	-0.215351	0.2126	2
FH	-0.215251	0.531017	2
MACC1	-0.214183	0.313278	2
WDR12	-0.212776	0.207017	2
XPNPEP3	-0.212446	0.180098	2
CLTB	-0.212428	0.23052	2
ZMPSTE24	-0.211251	0.231576	2
BDP1	-0.21063	0.111883	2
APOL6	-0.209094	0.31505	2
RSAD1	-0.207197	0.238016	2
BLVRB	-0.204778	0.224241	2
ZCCHC4	-0.203105	0.20722	2
MRPS23	-0.201484	0.247826	2
AKAP11	-0.201162	0.366335	2
UFSP2	-0.201044	0.351253	2
WDR73	-0.200144	0.17595	2
C1orf109	-0.200029	0.257661	2
CSNK2A1	-0.199445	0.234652	2
TTC19	-0.199425	0.29124	2
NOMO3	-0.19911	0.257675	2
MRPL32	-0.198552	0.219249	2
ZNF324	-0.198082	0.247172	2
NSA2	-0.197583	0.108008	2
GNL2	-0.197355	0.0968866	2
DDX56	-0.196263	0.205246	2
PSMB6	-0.195957	0.167692	2
CXXC1	-0.195142	0.166308	2
ERGIC1	-0.194827	0.288215	2
CNDP2	-0.193944	0.211923	2
BUD23	-0.193521	0.297828	2
COQ4	-0.191868	0.631987	2
MTRR	-0.191262	0.14006	2
MRPS11	-0.190872	0.398218	2
DMXL1	-0.190586	0.312914	2
SLC30A6	-0.190105	0.183957	2
RPL18	-0.189068	0.121234	2
RIOK2	-0.18896	0.233789	2
SUB1	-0.188949	0.348621	2
FARS2	-0.188388	0.609603	2
PDXDC1	-0.188171	0.154592	2
DDX49	-0.186267	0.435855	2
NUP58	-0.18623	0.144591	2
TTC39C	-0.184723	0.189189	2
FARSA	-0.184684	0.324538	2
RSU1	-0.183936	0.223963	2
ABCF3	-0.183768	0.264941	2
KIF21B	-0.182702	0.222957	2
FASTKD1	-0.18083	0.17419	2
RAB39B	-0.180374	0.233262	2
ZC3H14	-0.178375	0.164722	2
NOMO1	-0.178363	0.278685	2
ZC3H8	-0.177995	0.168588	2
ERI3	-0.176314	0.285087	2
VAV1	-0.176039	0.215543	2
PTGES2	-0.175268	0.262105	2
MTX1	-0.175209	0.179601	2
BORA	-0.174436	0.180656	2
RPL38	-0.173852	0.0892441	2
MYH10	-0.173743	0.240131	2
NACC1	-0.172747	0.265248	2
ATP6V1F	-0.171982	0.176996	2
ATXN7L3B	-0.171552	0.138507	2
KIAA0100	-0.170907	0.121658	2
KLHDC10	-0.170606	0.30865	2
EIF3H	-0.170569	0.0961741	2
ANAPC1	-0.169563	0.175507	2
PGPEP1	-0.168044	0.169564	2
PHB2	-0.16739	0.224073	2
GM2A	-0.167088	0.11135	2
ZNF598	-0.166941	0.21979	2
ANKRD10	-0.165923	0.145811	2
PPP1R15B	-0.16562	0.133967	2
PREPL	-0.164274	0.231843	2
NSUN5	-0.163199	0.307147	2
NDUFV1	-0.162823	0.167833	2
FTSJ1	-0.162413	0.230347	2
NFATC3	-0.162267	0.174497	2
ACIN1	-0.16118	0.137166	2
MMS19	-0.160266	0.138953	2
GUF1	-0.159629	0.136266	2
CSTF3	-0.158844	0.155808	2
PPIP5K1	-0.158146	0.335209	2
PFDN6	-0.157384	0.129529	2
THOC1	-0.156881	0.138068	2
KDM2A	-0.156722	0.14797	2
KNOP1	-0.156661	0.174551	2
NDUFV3	-0.156211	0.555277	2
POLR2H	-0.156028	0.220458	2
USP5	-0.155942	0.164268	2
NOMO2	-0.155936	0.296993	2
PRPF19	-0.155791	0.0983454	2
CARS2	-0.155098	0.153614	2
LAP3	-0.154599	0.115122	2
PELP1	-0.154152	0.163955	2
PDPR	-0.15207	0.159957	2
RPS5	-0.151568	0.119847	2
GRAMD4	-0.151562	0.204093	2
MRPS31	-0.150657	0.174273	2
SUCLA2	-0.150027	0.240335	2
ETFA	-0.149958	0.190276	2
VAC14	-0.149536	0.192639	2
DHX30	-0.149427	0.17046	2
OXSR1	-0.14857	0.132302	2
EDEM3	-0.148077	0.233764	2
ICE1	-0.147673	0.245826	2
ELP2	-0.147378	0.188779	2
UROS	-0.146779	0.307367	2
LRRC47	-0.146554	0.125961	2
M6PR	-0.145825	0.330753	2
ILF2	-0.144794	0.231291	2
TMEM87B	-0.144359	0.185932	2
HSPBP1	-0.142802	0.54207	2
INTS4	-0.14278	0.139044	2
VPS8	-0.141379	0.180019	2
TMED4	-0.141338	0.206949	2
EEF2K	-0.141079	0.171259	2
PCDH9	-0.139778	0.159598	2
GOPC	-0.138899	0.12917	2
RRBP1	-0.13755	0.296571	2
UQCC1	-0.135636	0.20849	2
DDB1	-0.135289	0.245135	2
CD164	-0.135126	0.110771	2
EIF3G	-0.134329	0.182495	2
MRS2	-0.1342	0.145169	2
PSMC4	-0.133383	0.19374	2
METTL3	-0.133062	0.146033	2
FAM136A	-0.132786	0.156537	2
MARS1	-0.131922	0.170713	2
MEN1	-0.130741	0.264006	2
NUP43	-0.130485	0.151979	2
API5	-0.128709	0.129634	2
DNAJC11	-0.128635	0.1614	2
CDKAL1	-0.128489	0.153908	2
LARS2	-0.128141	0.477487	2
EPB41	-0.12696	0.083028	2
BTK	-0.12568	0.123441	2
MRPS15	-0.125347	0.441036	2
EFTUD2	-0.125165	0.104563	2
SIKE1	-0.125076	0.178065	2
MFN2	-0.123391	0.113489	2
MRPL11	-0.122361	0.399014	2
AP2M1	-0.12083	0.249554	2
TPR	-0.11973	0.169815	2
MRPS7	-0.116719	0.120035	2
PSME2	-0.116025	0.248081	2
IST1	-0.115843	0.103866	2
SAFB2	-0.113117	0.138403	2
PRDX5	-0.11181	0.210873	2
CDC37	-0.111422	0.148525	2
PSMC3	-0.107193	0.11483	2
DNAJA3	-0.106403	0.154745	2
GPX4	-0.104642	0.107397	2
NCKAP1L	-0.102564	0.11758	2
DLG1	-0.102186	0.111633	2
SNRPD3	-0.0981158	0.143301	2
IDH3B	-0.0977811	0.163894	2
TIMM50	-0.0961152	0.0923165	2
EIF2B5	-0.0952946	0.205023	2
KIAA0930	-0.0929694	0.250467	2
DDX23	-0.0800277	0.085934	2
SYK	0.0763757	-0.275901	3
MSH6	0.0818193	-0.178317	3
HMGB2	0.0836882	-0.182697	3
HMGN2	0.0842588	-0.209028	3
STK24	0.0892393	-0.0763066	3
CNBP	0.0915947	-0.146153	3
BUB1B	0.0933761	-0.153207	3
SLC38A1	0.0934167	-0.161292	3
DYRK1A	0.0939434	-0.127351	3
RMND5A	0.095571	-0.228097	3
KLHL6	0.0958961	-0.357423	3
SNX5	0.0976717	-0.145661	3
DKC1	0.0983009	-0.263514	3
CHD3	0.0995874	-0.15182	3
TTF2	0.0996631	-0.0994192	3
SERP1	0.100647	-0.084878	3
NUGGC	0.101024	-0.650087	3
MAP4K4	0.102293	-0.143993	3
CTPS1	0.102611	-0.135899	3
SYNE2	0.105381	-0.112159	3
SUMO2	0.107581	-0.156822	3
RAPGEF2	0.109286	-1.02014	3
CD2BP2	0.112448	-0.102656	3
EDRF1	0.113886	-0.119902	3
CEP152	0.114717	-0.152292	3
CCDC69	0.116347	-0.104841	3
GFOD1	0.116696	-0.132644	3
MIB1	0.117075	-0.153381	3
YWHAQ	0.118273	-0.113206	3
DMTF1	0.118805	-0.341811	3
JADE1	0.119468	-0.142894	3
GRB2	0.119953	-0.19908	3
EIF4A2	0.120034	-0.191789	3
EIF4G2	0.121023	-0.168332	3
ANLN	0.121508	-0.143437	3
PRPS1	0.122798	-0.134436	3
RALGPS2	0.123492	-0.158596	3
UVRAG	0.124038	-0.242456	3
FRYL	0.124076	-0.157569	3
QKI	0.124202	-0.38099	3
NCOA3	0.124851	-0.511586	3
NIPA1	0.125434	-0.148208	3
PPM1A	0.125909	-0.444205	3
RAC1	0.126045	-0.194591	3
ATP2A2	0.126843	-0.150114	3
SMAD1	0.127808	-0.256904	3
DDX54	0.128019	-0.128888	3
UAP1	0.128585	-0.291844	3
UBE2J1	0.128738	-0.121293	3
TOP2B	0.129463	-0.128374	3
RHEB	0.129529	-0.186407	3
FAM126A	0.129823	-0.538084	3
TTLL12	0.130598	-0.208482	3
IRAG2	0.130751	-0.234902	3
ERBIN	0.130957	-0.263254	3
SMAD2	0.131079	-0.107182	3
DERA	0.131251	-0.180269	3
PRKCE	0.131359	-0.163251	3
NFKBIA	0.131417	-0.336181	3
RRM2	0.132068	-0.253391	3
SLC25A4	0.132989	-0.159308	3
LSM14A	0.133694	-0.115786	3
SSBP2	0.134443	-0.322104	3
BCL6	0.13476	-0.171652	3
S1PR2	0.135419	-0.326415	3
YEATS2	0.135711	-0.160342	3
SNX22	0.136581	-0.272851	3
RUBCN	0.137383	-0.109906	3
USP6NL	0.137646	-0.202705	3
BID	0.139106	-0.249522	3
POLR2F	0.139247	-0.256702	3
VPS13B	0.139478	-0.278593	3
RNF149	0.139607	-0.187658	3
BMP6	0.139901	-0.156891	3
VDAC1	0.139926	-0.136965	3
BNIP3	0.14018	-0.459133	3
KCTD3	0.1407	-0.205997	3
MLLT6	0.141437	-0.192796	3
PFKM	0.142789	-0.37002	3
SPINDOC	0.143755	-0.206221	3
NUB1	0.143899	-0.282764	3
USP7	0.144057	-0.138369	3
PRC1	0.144333	-0.172452	3
FAM81A	0.144556	-0.525305	3
MDM2	0.144968	-0.258638	3
SLBP	0.145421	-0.104975	3
USP13	0.147314	-0.212309	3
CTNNAL1	0.147368	-0.333861	3
MRPL27	0.147483	-0.21619	3
IRS1	0.148062	-0.452386	3
CDK13	0.148412	-0.261374	3
EHMT1	0.148814	-0.169644	3
DCK	0.149457	-0.300628	3
HMGB1	0.150885	-0.15677	3
RBL1	0.15162	-0.11846	3
IL4R	0.153413	-0.23431	3
CDK14	0.154159	-0.323716	3
STXBP6	0.154595	-0.277822	3
PTEN	0.154665	-0.119452	3
MFHAS1	0.155554	-0.476222	3
AP1B1	0.155943	-0.269802	3
PGM3	0.156527	-0.151243	3
SLC9A7	0.157077	-0.13829	3
H2AZ2	0.15856	-0.154937	3
SPATS2	0.158597	-0.277421	3
PABPC4	0.158643	-0.320355	3
FOXP1	0.159001	-0.1608	3
SEL1L3	0.15989	-0.146865	3
PPIA	0.16066	-0.11748	3
BTG2	0.162397	-0.140271	3
MAST2	0.163572	-0.471475	3
AGGF1	0.16438	-0.145848	3
XRCC3	0.166755	-0.146153	3
TINF2	0.166776	-0.187444	3
SMIM20	0.166788	-0.222314	3
BCAT1	0.166953	-0.27474	3
CYB5R4	0.167034	-0.219452	3
CDC6	0.167075	-0.534072	3
COBLL1	0.168766	-0.684621	3
TXNRD1	0.168779	-0.118586	3
BNIP3L	0.169664	-0.18898	3
AKAP13	0.170373	-0.146373	3
TGIF2	0.170402	-0.437841	3
UCHL1	0.171058	-0.548378	3
UBE2S	0.171247	-0.118008	3
DYNC1H1	0.171602	-0.156446	3
FAM102A	0.171767	-0.343655	3
TFDP2	0.172216	-0.23004	3
E2F1	0.173136	-0.17045	3
ACSF3	0.174038	-0.227034	3
CLPTM1L	0.174705	-0.145089	3
CLEC2D	0.174909	-0.303268	3
TMEM19	0.175968	-0.125493	3
C16orf72	0.176483	-0.125867	3
COMT	0.176503	-0.236966	3
PLCG2	0.176574	-0.157284	3
CXCR4	0.176884	-0.0838875	3
FAM216A	0.177364	-0.225825	3
PRPS2	0.177632	-0.440685	3
CBX5	0.1786	-0.298213	3
SERINC5	0.178977	-0.384361	3
MBNL1	0.179085	-0.215707	3
TTC7A	0.180618	-0.176054	3
PRKCA	0.182517	-0.23041	3
SLC3A2	0.183028	-0.216874	3
FLOT1	0.184066	-0.202878	3
CAMKK2	0.184482	-0.216537	3
MYBL2	0.184543	-0.139852	3
OSBPL9	0.18468	-0.172155	3
COMMD4	0.184782	-0.244869	3
ECI1	0.185565	-0.167901	3
EARS2	0.18572	-0.248419	3
BMP7	0.186734	-0.459726	3
CBS	0.187723	-0.324858	3
RNF168	0.187819	-0.163858	3
PCGF3	0.188062	-0.11509	3
RCOR1	0.188211	-0.184795	3
PIK3C2A	0.18956	-0.11447	3
ENTPD4	0.190003	-0.123184	3
MED13	0.191288	-0.211721	3
C12orf76	0.191788	-0.558932	3
CPD	0.191916	-0.206559	3
CNOT2	0.197668	-0.134878	3
MPZL1	0.199594	-0.313359	3
FAM20B	0.19965	-0.162371	3
KLHL24	0.200864	-0.465213	3
MYO5A	0.201017	-0.216628	3
TMEM131L	0.201098	-0.303848	3
AFF2	0.201731	-0.32543	3
BICD2	0.202056	-0.236537	3
FNBP1	0.202956	-0.495617	3
SLC31A1	0.203139	-0.14956	3
MYO1E	0.203825	-0.360917	3
RFTN1	0.204173	-0.303925	3
PBK	0.205986	-0.23271	3
PHLPP2	0.206072	-0.676219	3
AP4E1	0.206997	-0.2603	3
ZNF100	0.207162	-0.202051	3
ATP1A3	0.208554	-0.262903	3
RELB	0.210518	-0.401349	3
GEN1	0.211136	-0.135462	3
RGS13	0.211427	-0.53048	3
MGAT3	0.21247	-0.496457	3
MYL6	0.213185	-0.31495	3
TRANK1	0.214502	-0.468637	3
CFL2	0.215721	-0.51275	3
MTHFD2	0.215971	-0.153654	3
EIF2AK3	0.216527	-0.166995	3
KCNN3	0.216598	-0.43449	3
NDE1	0.216921	-0.241064	3
CENPU	0.217225	-0.162574	3
EMC9	0.217765	-0.268651	3
STARD9	0.218428	-0.297731	3
TMSB4X	0.218748	-2.96807	3
PLAGL2	0.219228	-0.207967	3
APBB1IP	0.219655	-0.161745	3
E2F2	0.219684	-0.106125	3
VEZT	0.219867	-0.300243	3
TAPT1	0.220119	-0.343214	3
SBDS	0.221711	-0.275304	3
GJC1	0.221781	-0.165789	3
TUBA1A	0.222149	-0.229116	3
NDFIP1	0.223268	-0.422505	3
RYBP	0.223469	-0.278687	3
GBA	0.224765	-0.214336	3
DTX1	0.225287	-0.249891	3
TPD52	0.226093	-0.257426	3
CRYBG1	0.226224	-0.153405	3
H3C1	0.227254	-0.314818	3
KIF24	0.227435	-0.205289	3
ZNF814	0.227563	-0.192176	3
PHTF2	0.228438	-0.145211	3
TSPAN3	0.230094	-0.292008	3
UBE2E2	0.230277	-0.385556	3
TAF12	0.230607	-0.219837	3
ATF7IP	0.231792	-0.186757	3
DBI	0.232107	-0.112838	3
RPL10	0.232305	-0.114274	3
MBD2	0.232411	-0.161943	3
ABLIM1	0.232899	-0.436387	3
PHAX	0.234093	-0.149432	3
STMN1	0.234225	-0.169609	3
LASP1	0.234837	-0.395062	3
FADS2	0.236217	-0.440006	3
ZNF322	0.236395	-0.392758	3
TCF3	0.237048	-0.178613	3
KAT2B	0.237803	-0.302866	3
LAX1	0.240657	-0.359307	3
SETX	0.240851	-0.152757	3
MAN2A1	0.241066	-0.278237	3
RIT1	0.242093	-0.209078	3
SLC25A19	0.242502	-0.227885	3
WEE1	0.242657	-0.112658	3
CBX4	0.242661	-0.14416	3
WHAMM	0.243664	-0.179395	3
STK17B	0.245015	-0.204788	3
NBR1	0.245305	-0.1553	3
CLIC4	0.245376	-0.315106	3
MTCL1	0.245402	-0.533098	3
DPY19L2	0.24699	-0.597297	3
PHF3	0.247067	-0.152956	3
HSPA4L	0.24819	-0.209878	3
ARHGEF2	0.248234	-0.124586	3
RAP1A	0.248344	-0.192767	3
UGP2	0.248479	-0.479946	3
PTAFR	0.249766	-0.435114	3
GARRE1	0.25	-0.277575	3
DEPTOR	0.251199	-0.181121	3
PXN	0.251526	-0.246396	3
MCL1	0.251688	-0.234167	3
UBXN2A	0.251783	-0.486132	3
WDR19	0.255865	-0.215037	3
JAZF1	0.256869	-0.307311	3
KIAA0040	0.25707	-0.34146	3
NT5C3B	0.257877	-0.46881	3
SKIL	0.258827	-0.232995	3
TOX	0.259245	-0.851203	3
APBB2	0.260824	-0.128962	3
SMARCB1	0.261183	-0.259888	3
KCNMB4	0.26243	-0.393803	3
TK1	0.262547	-0.194774	3
FUNDC2	0.262555	-0.417954	3
ZFAND4	0.263834	-0.234343	3
CSF2RB	0.264165	-0.528583	3
ATP2B1	0.266892	-0.413001	3
ENTR1	0.267295	-0.234154	3
C1orf216	0.268388	-0.671737	3
SHOC2	0.269276	-0.197777	3
CD46	0.269365	-0.267395	3
ATP6V1G1	0.270019	-0.168361	3
TNFSF8	0.270096	-0.331966	3
ACADVL	0.272708	-0.202868	3
CENPM	0.273833	-0.254343	3
LRIG3	0.274419	-0.263548	3
ZC3H12D	0.274529	-0.558974	3
MKNK1	0.274847	-0.250687	3
MYBL1	0.276745	-0.266522	3
TSPAN14	0.278376	-0.482961	3
TRIM8	0.278486	-0.273268	3
CD81	0.279164	-0.205444	3
ZNF639	0.279276	-0.171505	3
ACVR2B	0.279375	-0.38064	3
GABPB2	0.279392	-0.228964	3
CD79B	0.279561	-0.114616	3
SPCS2	0.280245	-0.232907	3
SSX2IP	0.280956	-0.442705	3
MAN1A1	0.280967	-0.571098	3
TIFA	0.280977	-0.279497	3
PRELID3A	0.281048	-0.338873	3
ZNF254	0.281355	-0.510592	3
GPCPD1	0.281602	-0.117337	3
ZHX2	0.28213	-0.207518	3
BEST3	0.282238	-0.517888	3
MZB1	0.28405	-0.109222	3
ORC6	0.285204	-0.119925	3
GLCCI1	0.288016	-0.476434	3
ZEB1	0.289279	-0.375719	3
BACH2	0.290763	-0.255537	3
HSD17B12	0.291024	-0.234308	3
EIF4EBP2	0.29187	-0.228347	3
SCARB1	0.294097	-0.250281	3
GNPTAB	0.295789	-0.183875	3
PEA15	0.296882	-0.376646	3
BLK	0.298049	-0.25669	3
PELI1	0.298884	-0.28347	3
ACSL1	0.299703	-0.223927	3
BCL2L1	0.301768	-0.150439	3
CCDC171	0.304129	-0.34079	3
SCMH1	0.305072	-0.739398	3
TMEM9	0.310469	-0.315923	3
BMPR2	0.310552	-0.61619	3
PRCP	0.311227	-0.677109	3
CIITA	0.312939	-0.202048	3
CTNND1	0.317607	-1.30196	3
BRI3BP	0.317978	-0.446405	3
ZNF468	0.319794	-0.195297	3
SREBF2	0.319895	-0.110129	3
KIF3C	0.321051	-0.85503	3
SOCS1	0.322599	-0.394633	3
NIN	0.32319	-0.51854	3
EML6	0.323361	-0.107973	3
SLC7A5	0.327212	-0.152554	3
CSNK1G3	0.331081	-0.56195	3
HGH1	0.337887	-0.201214	3
RUFY3	0.340603	-0.247185	3
HGH1	0.341214	-0.205917	3
CORO1C	0.344066	-0.232883	3
SEPHS1	0.344319	-0.285573	3
C2orf76	0.347203	-0.543547	3
BCL7A	0.34825	-0.200071	3
CD38	0.350451	-0.122103	3
LOXL2	0.352142	-0.817341	3
ERC1	0.354493	-0.364818	3
GALNT2	0.354578	-0.206967	3
MRPS6	0.355011	-0.444666	3
TBC1D1	0.355077	-0.152119	3
RNF144B	0.360515	-0.261434	3
ZNF347	0.364266	-0.977185	3
SIAH2	0.36442	-0.315888	3
SEC11C	0.367364	-0.267039	3
FER	0.367392	-0.534984	3
ZNF253	0.370904	-0.287093	3
P2RY8	0.371642	-0.258688	3
HPS4	0.373234	-0.572191	3
FARP2	0.374266	-0.521927	3
RIC1	0.37488	-0.212483	3
NLGN4X	0.376599	-0.256702	3
CRYBG3	0.378378	-1.40289	3
RAP1GAP2	0.378465	-0.159746	3
H2AC14	0.380829	-0.591192	3
TXNDC11	0.381215	-0.153873	3
PNRC1	0.381353	-0.22806	3
VNN2	0.382059	-0.771648	3
ASXL1	0.38429	-0.374122	3
RFX5	0.385235	-0.26968	3
TRIM14	0.386686	-0.556949	3
JUP	0.387254	-2.48535	3
FAM167A-AS1	0.389091	-0.622477	3
REXO5	0.389353	-1.30632	3
SLC7A3	0.391799	-1.30077	3
SLC37A3	0.394939	-0.305985	3
KHNYN	0.395326	-0.144611	3
TRAM2	0.395853	-0.393525	3
GNB4	0.396188	-0.64175	3
CHST15	0.397018	-0.280516	3
CD86	0.400094	-0.783224	3
GAREM1	0.401387	-0.406349	3
SCRN1	0.402668	-0.150258	3
GTF2A1	0.403301	-0.213782	3
RELL1	0.404472	-0.326968	3
HLA-DMA	0.409011	-0.199466	3
B4GALT6	0.410455	-2.97656	3
CD74	0.410922	-0.131865	3
VWC2	0.411632	-0.474754	3
KLHL3	0.412951	-5.9652	3
SLC38A5	0.414859	-0.164566	3
PKIG	0.416145	-0.363096	3
WDR34	0.418999	-0.288609	3
KCNK12	0.421375	-0.423031	3
RAB30	0.42159	-0.515813	3
HLA-DOA	0.422573	-0.291648	3
DENND1B	0.427433	-0.150292	3
AGO4	0.429277	-1.33295	3
SAMD9	0.43203	-0.311132	3
RNF122	0.435857	-0.519145	3
ZNF518B	0.435919	-0.571369	3
CRYBG3	0.435932	-1.3112	3
SSR3	0.441962	-0.178904	3
SOX5	0.442389	-0.883599	3
CPEB4	0.445524	-0.168555	3
LRP11	0.446683	-0.39186	3
YPEL1	0.453681	-0.482832	3
DGKD	0.456781	-0.223008	3
CADPS	0.458839	-0.570874	3
ZDBF2	0.464764	-0.617266	3
CAMSAP2	0.467764	-0.294805	3
SCOC	0.468595	-0.571871	3
CD59	0.470856	-0.655797	3
SRRD	0.475295	-0.651906	3
PIM2	0.475685	-0.120547	3
IGF1R	0.476211	-0.413992	3
SLC30A4	0.489692	-1.6502	3
SPRED2	0.490804	-0.209347	3
OSR2	0.50197	-2.45179	3
TMSB10	0.505318	-0.17296	3
DNMT3B	0.515456	-0.19712	3
MINPP1	0.517245	-2.15292	3
SESN1	0.52425	-0.303559	3
CYTH1	0.530676	-0.179584	3
NUCB2	0.535479	-0.204386	3
SQLE	0.538076	-0.124469	3
GNE	0.538166	-0.348763	3
SESN2	0.545147	-0.149085	3
BIN2	0.550969	-1.07667	3
ENDOV	0.554395	-0.453271	3
PDGFD	0.555367	-0.441057	3
HLA-DPA1	0.556213	-0.45587	3
SSBP3	0.559178	-0.640111	3
TRIB1	0.561579	-0.348905	3
ITPKB	0.564626	-0.494888	3
ZNF350	0.577767	-4.07324	3
HLA-DRA	0.580306	-0.385463	3
RASGRP3	0.5831	-0.796746	3
CREB5	0.583765	-0.261853	3
BRSK1	0.587858	-0.532925	3
DST	0.595907	-0.277167	3
ZNF45	0.598851	-0.375888	3
BCAR3	0.603569	-0.809727	3
CRTC3	0.603905	-0.847733	3
PLCL2	0.60575	-0.364685	3
FGD6	0.607639	-1.09782	3
SEL1L	0.616248	-0.107497	3
PSEN2	0.617259	-0.44822	3
ZNF180	0.617404	-0.683714	3
ELOVL6	0.618222	-0.453504	3
SPON2	0.625944	-0.480857	3
HELQ	0.630929	-0.33781	3
ALDOC	0.635593	-0.343819	3
FAIM	0.636839	-0.472968	3
TXNIP	0.664584	-0.436568	3
CEP70	0.675801	-0.487895	3
PIK3CA	0.67664	-0.633127	3
IFI35	0.68531	-0.534467	3
CFLAR	0.690446	-0.207231	3
AIFM2	0.699725	-0.550964	3
TAS1R3	0.704379	-0.388549	3
TSC22D3	0.704846	-0.616866	3
ST7	0.713248	-0.761332	3
LMO3	0.717587	-0.6781	3
TDRKH	0.72578	-0.377906	3
HLA-DPB1	0.74012	-0.295324	3
ECI2	0.745564	-0.51207	3
ZNF320	0.750178	-1.02131	3
CNGB3	0.766632	-1.56847	3
GALNT6	0.788251	-0.90223	3
CYP51A1	0.797239	-0.396831	3
PNMA8B	0.821533	-2.0336	3
RASL10A	0.830491	-1.11222	3
INSR	0.842097	-0.718829	3
FRK	0.853995	-1.04103	3
STS	0.883884	-0.277	3
ABRAXAS1	0.896961	-0.196717	3
PDZRN4	0.929993	-1.63352	3
STOX2	0.950727	-0.357614	3
ACKR4	0.977173	-1.05436	3
SORD	0.985537	-0.452716	3
BHLHA15	0.987314	-1.44684	3
ADAM23	1.04166	-0.52928	3
KCNMB3	1.08214	-1.59211	3
LZTS1	1.11804	-0.570183	3
ESYT3	1.12599	-0.731684	3
ZKSCAN7	1.13489	-4.20862	3
GPR85	1.14206	-2.793	3
HBEGF	1.15643	-0.255741	3
UBA7	1.2139	-0.585481	3
PIM1	1.21777	-0.428223	3
CUX2	1.23906	-0.539533	3
PLCXD3	1.27086	-2.3182	3
JAML	1.37541	-3.53979	3
GPD2	1.40318	-1.05525	3
CTTN	1.45841	-1.04061	3
GPM6A	1.49316	-2.83413	3
AP1S3	1.51899	-2.23494	3
CLGN	1.56473	-3.90722	3
PIGM	1.6349	-1.36048	3
WDR35	1.69826	-6.64364	3
PMEPA1	1.71102	-1.36727	3
CTNNA2	1.72884	-0.833239	3
LRRC14B	1.74559	-0.913711	3
GIMAP6	1.76993	-4.09576	3
ZSCAN18	1.7713	-1.2912	3
PDE3B	1.93885	-2.44581	3
TNNT1	2.05246	-0.921467	3
P4HA2	2.14741	-2.38904	3
PDE4B	2.4375	-1.39316	3
EVC2	3.64534	-1.49122	3
IMP4	0.089695	0.0780082	4
DDOST	0.103377	0.206518	4
PBRM1	0.111645	0.111903	4
MAVS	0.112413	0.116341	4
POLDIP3	0.114953	0.106985	4
SEC13	0.115175	0.179848	4
SHISA5	0.118487	0.137052	4
UBE2D2	0.122165	0.191549	4
YY1	0.123015	0.0795268	4
NDUFB7	0.123443	0.218978	4
SSR4	0.127013	0.20703	4
TMTC4	0.128431	0.294221	4
DCAF17	0.12937	0.131765	4
PRKCSH	0.131752	0.184896	4
CHD2	0.134338	0.178401	4
PAXIP1	0.137385	0.203481	4
HM13	0.138945	0.145919	4
ARF1	0.138966	0.125557	4
HNRNPA1L2	0.139245	0.139441	4
MESD	0.140611	0.3433	4
FKBP2	0.143612	0.149257	4
SNAPC3	0.143957	0.180094	4
ENTPD6	0.145044	0.384526	4
H4C9	0.1455	0.405621	4
PCYT2	0.146681	0.27413	4
AARS2	0.146906	0.236763	4
GPT2	0.148444	0.270259	4
PTBP2	0.148867	0.200069	4
COA1	0.154194	0.217173	4
WARS1	0.163058	0.13406	4
S100PBP	0.163763	0.17445	4
VPS35	0.163989	0.140902	4
DGLUCY	0.164641	0.413675	4
GPAT4	0.16714	0.0996313	4
TCF20	0.169267	0.081612	4
LMAN2	0.170849	0.129812	4
FAM193A	0.174054	0.217299	4
LETMD1	0.176407	0.312137	4
RPN2	0.177204	0.159315	4
TMEM230	0.177574	0.135758	4
AAR2	0.17786	0.192648	4
ZFYVE26	0.18201	0.164479	4
FKBP3	0.183073	0.180006	4
PIGG	0.184041	0.296713	4
HERC3	0.185945	0.28357	4
GRN	0.190055	0.286818	4
XYLT2	0.191683	0.188546	4
CLASRP	0.192729	0.281285	4
CLK2	0.194471	0.191234	4
WASHC5	0.194579	0.204864	4
CEP131	0.195412	0.264824	4
COPZ1	0.198151	0.158017	4
VPS36	0.203583	0.150792	4
SART1	0.205767	0.161068	4
CCDC130	0.206217	0.225777	4
B4GALT3	0.20687	0.260891	4
ZFAND2B	0.20988	0.361811	4
OCIAD1	0.210374	0.210075	4
SEMA4D	0.210999	0.200288	4
MPRIP	0.215326	0.179733	4
H2BC11	0.216638	0.223366	4
PSME1	0.216908	0.172731	4
CIZ1	0.217274	0.217065	4
DPM2	0.218243	0.237339	4
ZC3HC1	0.222769	0.534291	4
CPNE3	0.227824	0.181039	4
CENPJ	0.231244	0.224481	4
MXD4	0.231481	0.547397	4
HDAC5	0.232538	0.252814	4
CNKSR2	0.235934	0.230645	4
RPAIN	0.238521	0.269965	4
P3H1	0.238922	0.205061	4
OST4	0.238952	0.170447	4
HECTD3	0.239048	0.235421	4
P4HB	0.24007	0.0961926	4
PGD	0.243017	0.364294	4
PCIF1	0.243035	0.219146	4
MRPL57	0.244646	0.335219	4
CFAP251	0.24476	0.197025	4
TMEM135	0.246641	0.169887	4
ATXN2L	0.248145	0.240684	4
ZNF268	0.249786	0.23183	4
WASH4P	0.25107	0.291926	4
AP2A2	0.255673	0.224462	4
FAM50A	0.258132	0.28361	4
UTRN	0.259199	0.140789	4
CD99L2	0.261513	0.349085	4
ZNF543	0.262717	0.304465	4
WNT10A	0.263425	0.272234	4
PRKCQ	0.266201	0.271247	4
NKIRAS2	0.267572	0.181129	4
NKX6-3	0.268935	0.445512	4
EZH1	0.269313	0.239059	4
ICAM5	0.272386	0.311293	4
CHMP2A	0.278628	0.214023	4
MAP3K13	0.278811	0.40674	4
SND1	0.283091	0.0826135	4
PLXNA1	0.284782	0.60363	4
FBXW8	0.285064	0.269404	4
ZNF544	0.287194	0.414205	4
GATAD1	0.292161	0.253737	4
IFNAR1	0.292453	0.183353	4
IL10RB	0.294365	0.540295	4
COQ5	0.294655	0.318333	4
H3C11	0.296214	0.525567	4
TLN2	0.297995	0.517107	4
DENND5B	0.298519	0.172074	4
DNMBP	0.30082	0.317318	4
TAPBPL	0.30128	0.304791	4
SUMF1	0.302702	0.44612	4
FOXO3	0.30568	0.35967	4
FAM118A	0.306223	0.24467	4
LDLRAD4	0.307753	0.532675	4
IMPA2	0.31344	0.740146	4
TSC1	0.314756	0.190026	4
MGST2	0.314926	0.447199	4
ZNF84	0.317806	0.249424	4
H4C2	0.318642	0.20379	4
ZNF707	0.319436	0.389453	4
ARHGAP25	0.319546	0.32016	4
LIPA	0.319791	0.410721	4
RNF121	0.320593	0.407011	4
ZNF714	0.320674	0.319722	4
ARID5B	0.330943	0.130689	4
EDEM2	0.331072	0.285777	4
ARMCX6	0.334399	0.297926	4
SLC35B4	0.341232	0.157216	4
H2BC17	0.348255	0.287765	4
FSD1	0.349983	0.42715	4
HDAC6	0.350405	0.188322	4
XBP1	0.350818	0.0912629	4
H2AC16	0.351052	0.283668	4
FCHSD1	0.355761	0.229066	4
DUSP22	0.356481	0.132846	4
SULT1A1	0.356971	0.563564	4
FOXN3	0.362203	0.165911	4
BMI1	0.363016	0.305469	4
PPM1K	0.365266	0.165723	4
MRI1	0.371074	0.271772	4
H2BC12	0.372596	0.332233	4
ZMIZ1	0.374094	0.620269	4
SNN	0.375908	0.406974	4
MPC1	0.376064	0.347974	4
SETD1B	0.379539	0.383732	4
CARMIL1	0.380709	0.115099	4
TMEM120B	0.382635	0.761842	4
ERG28	0.383434	0.293652	4
SLC2A6	0.38428	0.23053	4
H2AC12	0.386689	0.253951	4
H2AC11	0.388365	0.244564	4
APOL2	0.38898	0.214159	4
SCD5	0.389496	0.613288	4
PIK3CD	0.392915	0.152637	4
H2BC8	0.402359	0.265644	4
CASP7	0.407582	0.209268	4
FRRS1	0.413692	0.332157	4
H2BC15	0.414979	0.195181	4
EBP	0.416452	0.129659	4
COMMD3	0.425242	0.460239	4
H2AC15	0.42776	0.171482	4
CLCN6	0.427785	0.358596	4
H2AC18	0.428887	0.275225	4
HEBP2	0.432829	0.394251	4
H3C14	0.437178	0.159945	4
NENF	0.437355	0.792827	4
ZNF875	0.437538	0.392849	4
H3C15	0.43761	0.161009	4
NSDHL	0.43996	0.186253	4
H2AC18	0.444585	0.262373	4
KLF13	0.448197	0.135007	4
H1-5	0.450231	0.30251	4
H1-3	0.455949	0.499468	4
BTN3A1	0.456328	0.275709	4
HSD17B7	0.456869	0.174811	4
ZDHHC14	0.45721	0.2633	4
CHD1	0.459712	0.297617	4
H1-4	0.466054	0.234225	4
H4C8	0.472076	0.195658	4
H3C12	0.472813	0.232565	4
HGS	0.47283	0.336979	4
ACO1	0.480088	1.0583	4
MAP2K6	0.481429	0.565375	4
N4BP2L2	0.490537	0.351404	4
FAM111A	0.491647	0.193166	4
FZD5	0.49779	0.586655	4
H1-2	0.500256	0.253254	4
ZNF550	0.509142	0.411302	4
EPOP	0.512478	0.603286	4
DPYSL2	0.513561	0.190612	4
KCTD7	0.515597	0.638254	4
SLC23A2	0.518841	0.205235	4
H2AC6	0.52058	0.314075	4
SHFL	0.52198	0.487349	4
ANXA2R	0.522706	0.420418	4
NPC2	0.528084	0.460196	4
APC2	0.529665	0.53569	4
PCBD1	0.531579	0.436118	4
FASTKD2	0.535657	0.775986	4
HSP90B1	0.537747	0.319956	4
STK38L	0.54313	0.766218	4
ATPAF1	0.545548	0.427778	4
H2BC4	0.546027	0.233391	4
C2CD2	0.546148	0.362259	4
EIF4EBP1	0.547265	0.308976	4
ZNF333	0.54776	0.690925	4
PLEKHG1	0.549363	0.358199	4
PHGDH	0.552667	0.231745	4
TMEM97	0.555476	0.148503	4
RIPOR2	0.558018	0.521645	4
H3C2	0.562678	0.231962	4
CREB3L2	0.567046	0.337414	4
TECPR1	0.569295	0.224526	4
FANCD2	0.58337	0.304764	4
H4C5	0.585708	0.27256	4
CELSR1	0.587688	0.601193	4
TBC1D7	0.597888	0.349709	4
PITX2	0.603391	0.652405	4
SMIM30	0.606659	0.351665	4
HSPG2	0.610603	0.817099	4
OPTN	0.612889	0.649931	4
WNT6	0.614039	1.14228	4
H2AC8	0.61591	0.438842	4
H3C4	0.618903	0.229567	4
NCKAP5L	0.626368	0.54652	4
GALNT10	0.627706	0.175049	4
ENTPD1	0.630162	0.694474	4
ARFGAP3	0.642169	0.397817	4
UBE2L6	0.658759	0.648402	4
H2BC7	0.663694	0.469775	4
LDLR	0.66372	0.141522	4
MGST3	0.665853	0.463707	4
MPZ	0.670639	0.981716	4
BTN3A3	0.672058	0.355982	4
FOXN4	0.675716	0.67315	4
ARHGEF9	0.696518	0.485672	4
ZNF256	0.706442	0.759844	4
ZNF329	0.745522	0.420979	4
CPNE2	0.769347	0.227004	4
H2AW	0.77624	0.302121	4
H2AC4	0.780983	0.769041	4
MVK	0.78909	0.514156	4
H2AC21	0.791314	0.29065	4
HELZ2	0.792026	0.254047	4
CYP2R1	0.801067	0.348453	4
SLC7A11	0.813824	0.432413	4
SPNS3	0.816566	0.754342	4
ZNF275	0.82001	0.931536	4
ULBP3	0.82882	0.719047	4
AFF1	0.843637	0.74354	4
H2BC21	0.859667	0.257958	4
TRIM7	0.868483	0.974739	4
HMGCS1	0.87743	0.111265	4
ZBTB8A	0.881493	0.79785	4
MOB3C	0.903916	0.613477	4
H2BU1	0.914385	0.243347	4
PAQR6	0.92739	0.59436	4
PTPDC1	0.968761	0.973243	4
SOX4	1.0088	0.370311	4
P2RX5	1.00988	0.287764	4
LTA	1.03585	1.22822	4
MAG	1.04292	1.29798	4
CDK18	1.05675	0.866402	4
ZNF713	1.08477	0.699725	4
CCDC144A	1.09239	1.19648	4
TNFRSF14	1.10016	0.50333	4
EEPD1	1.10148	0.999155	4
SP140	1.10154	0.658082	4
USP27X	1.10928	0.81744	4
DNAJC15	1.11573	0.69234	4
KLHL21	1.11951	0.847971	4
MVD	1.13111	0.28286	4
MFGE8	1.15073	2.61371	4
SNTB1	1.15378	0.28457	4
ADM2	1.15827	0.864939	4
ARHGAP27	1.17579	1.16802	4
C4orf36	1.19702	0.82679	4
DUSP10	1.20241	0.898521	4
SPATA20	1.20301	1.21661	4
SIGLEC10	1.25449	0.63634	4
ZNF302	1.28839	1.73899	4
AP001468.1	1.29121	0.463143	4
ACSS1	1.35645	0.289606	4
ADCY9	1.3992	0.799201	4
APOL3	1.4154	1.04387	4
GABBR1	1.41543	2.95181	4
ELAPOR1	1.41835	1.34227	4
RBM43	1.61529	1.43686	4
WDFY1	1.77753	0.614479	4
TDRD7	1.82072	1.75874	4
NKX3-1	1.95657	1.14052	4
CHST11	2.00405	2.24537	4
ABCD2	2.0082	1.64006	4
UNC13C	2.12787	0.522861	4
CASZ1	2.20546	1.14068	4
FGD2	2.25046	0.798593	4
ASAP3	2.27229	0.968898	4
EPSTI1	2.35452	2.07374	4
PARP12	2.3894	1.25879	4
HLA-F	2.42619	2.31745	4
TNFRSF1B	2.44672	1.83754	4
SLC9A9	2.50765	2.79954	4
GIMAP2	2.71465	1.11933	4
EIF2AK2	2.85278	2.9139	4
STK33	3.36914	3.37327	4
HEG1	4.52551	4.46402	4
ZNF630	4.9339	4.82997	4
