# Supplementary material for: MYC regulates ribosome biogenesis and mitochondrial gene expression programs through its interaction with host cell factor–1
Source: eLife. 2021 Jan 8;10:e60191. doi: 10.7554/eLife.60191 (PMC7793627; doi:10.7554/eLife.60191)
Supplement: Figure 4—source data 1. [file elife-60191-fig4-data1.xlsx]

## Sheet: Figure 4C
	FKBPFV-HCF-1N +DMSO			FKBPFV-HCF-1N +dTAG
	rep1	rep2	rep3	rep1	rep2	rep3
Day 0	0.02	0.02	0.02	0.02	0.02	0.02
Day 1	0.03	0.04125	0.03375	0.06	0.04125	0.04875
Day 2	0.1025	0.0825	0.085	0.05	0.0425	0.0475
Day 3	0.1775	0.1875	0.1875	0.05	0.025	0.0375
Day 4	0.495	0.5825	0.5725	0	0.0075	0.0075
