# Supplementary material for: MYC regulates ribosome biogenesis and mitochondrial gene expression programs through its interaction with host cell factor–1
Source: eLife. 2021 Jan 8;10:e60191. doi: 10.7554/eLife.60191 (PMC7793627; doi:10.7554/eLife.60191)
Supplement: Figure 4—source data 2. [file elife-60191-fig4-data2.xlsx]

## Sheet: Sheet1
Feature	Feature_gene_name	log2FoldChange	padj
ENSG00000099785.6	MARCH2	-0.311497	0.0354873
ENSG00000198060.5	MARCH5	-0.266736	0.00573371
ENSG00000145495.10	MARCH6	0.29478	4.30558e-06
ENSG00000136536.10	MARCH7	0.309696	1.37499e-05
ENSG00000165406.11	MARCH8	0.264508	0.00249086
ENSG00000180096.7	SEPT1	-0.309909	0.0173106
ENSG00000168385.13	SEPT2	0.156086	0.0282264
ENSG00000125354.18	SEPT6	0.210772	0.00152533
ENSG00000122545.13	SEPT7	0.326164	0.000207255
ENSG00000138758.7	SEPT11	0.211111	0.000989598
ENSG00000183291.11	SEPT15	0.21898	0.0115281
ENSG00000121410.7	A1BG	-0.859205	0.00583284
ENSG00000124608.4	AARS2	-0.305751	0.000372014
ENSG00000266967.2	AARSD1	-0.668144	0.000296406
ENSG00000167972.9	ABCA3	-0.652448	0.0184916
ENSG00000154262.8	ABCA6	0.71125	6.07125e-20
ENSG00000115657.8	ABCB6	-0.842409	0.0106166
ENSG00000124574.10	ABCC10	-0.244356	0.00968722
ENSG00000114770.12	ABCC5	-0.630628	4.3211e-11
ENSG00000119688.16	ABCD4	-0.239803	0.0130428
ENSG00000033050.3	ABCF2	-0.373355	4.25289e-06
ENSG00000161204.7	ABCF3	-0.615509	2.67173e-15
ENSG00000143994.9	ABHD1	-0.426393	0.0074772
ENSG00000106077.14	ABHD11	-0.565332	2.59714e-08
ENSG00000139826.5	ABHD13	-0.404344	0.0126827
ENSG00000168792.4	ABHD15	-0.239033	0.0442863
ENSG00000204427.7	ABHD16A	-0.897214	0.000103166
ENSG00000183260.5	ABHD16B	-0.894514	4.4901e-13
ENSG00000129968.11	ABHD17A	-0.263219	0.0022921
ENSG00000107362.9	ABHD17B	0.218408	0.0162915
ENSG00000158201.5	ABHD3	0.211275	0.00173215
ENSG00000011198.3	ABHD5	-0.642549	0.00553897
ENSG00000163686.9	ABHD6	-0.399283	0.00159537
ENSG00000127220.5	ABHD8	-0.293357	0.0212962
ENSG00000136754.12	ABI1	0.4296	2.65634e-11
ENSG00000154175.12	ABI3BP	-1.15062	0.000185129
ENSG00000143322.15	ABL2	-0.191542	0.0193499
ENSG00000099204.14	ABLIM1	0.254118	0.000211702
ENSG00000114626.13	ABTB1	-1.30449	0.000566425
ENSG00000166016.4	ABTB2	-0.529858	0.00208243
ENSG00000204957.1	AC006486.1	1.41036	5.34045e-20
ENSG00000214248.2	AC010336.1	-1.54938	3.52912e-05
ENSG00000267216.1	AC010642.1	0.975867	1.47738e-07
ENSG00000205147.3	AC016586.1	-0.459002	0.0320593
ENSG00000268730.1	AC022819.2	-1.71091	0.0433053
ENSG00000225885.2	AC023590.1	0.483957	0.000439447
ENSG00000269165.1	AC069547.1	0.379223	0.00680716
ENSG00000203691.2	AC092811.1	0.309549	0.0256923
ENSG00000203443.2	AC092964.1	-1.29013	0.0314722
ENSG00000269175.1	AC093157.1	-0.702485	0.0416308
ENSG00000214999.3	AC129492.6	-1.16698	0.0129216
ENSG00000216921.3	AC131097.4	-1.11378	0.000291003
ENSG00000183562.2	AC131971.1	0.434891	7.30948e-05
ENSG00000184566.2	AC132216.1	1.07799	0.0426799
ENSG00000060971.13	ACAA1	-0.372282	0.000260032
ENSG00000132142.15	ACACA	0.200129	0.00215531
ENSG00000151498.7	ACAD8	-0.620283	1.10888e-08
ENSG00000117054.9	ACADM	0.3098	0.00100442
ENSG00000131584.14	ACAP3	-0.342686	0.000356372
ENSG00000120437.7	ACAT2	0.446024	5.79498e-11
ENSG00000181513.10	ACBD4	-0.585614	7.5237e-05
ENSG00000102977.9	ACD	-0.258158	0.0158682
ENSG00000129048.6	ACKR4	0.39088	0.000236301
ENSG00000131473.12	ACLY	0.432308	5.39139e-09
ENSG00000153086.9	ACMSD	1.25955	4.01845e-11
ENSG00000161533.7	ACOX1	-0.300204	0.0125278
ENSG00000087008.11	ACOX3	0.33634	0.00153388
ENSG00000153093.14	ACOXL	0.788934	0.0309893
ENSG00000134575.5	ACP2	-0.455422	0.00258415
ENSG00000142513.4	ACPT	0.366279	0.0063967
ENSG00000147174.7	ACRC	0.358817	0.0329732
ENSG00000134940.9	ACRV1	0.300795	0.0212283
ENSG00000103740.5	ACSBG1	-0.987937	0.00246158
ENSG00000167107.8	ACSF2	-0.378812	0.0314435
ENSG00000123983.9	ACSL3	0.378562	1.29652e-07
ENSG00000068366.15	ACSL4	0.291951	0.000263178
ENSG00000197142.6	ACSL5	0.171251	0.0471133
ENSG00000138107.7	ACTR1A	-0.327813	0.00193817
ENSG00000138071.9	ACTR2	0.20738	0.00731361
ENSG00000115091.7	ACTR3	0.241937	0.00248794
ENSG00000101442.8	ACTR5	-0.570425	9.0165e-09
ENSG00000135503.8	ACVR1B	-0.395029	0.000539556
ENSG00000114739.9	ACVR2B	-0.567564	7.02339e-10
ENSG00000132744.3	ACY3	0.322319	0.00436612
ENSG00000073670.9	ADAM11	-0.943655	0.00242806
ENSG00000151694.8	ADAM17	0.162823	0.0275608
ENSG00000135074.11	ADAM19	0.309455	0.000115596
ENSG00000008277.10	ADAM22	-0.262738	0.00422247
ENSG00000114948.8	ADAM23	0.185855	0.0100901
ENSG00000168594.11	ADAM29	0.380164	0.0322766
ENSG00000160323.14	ADAMTS13	-0.427544	0.0233897
ENSG00000203804.3	ADAMTSL4-AS1	0.740928	0.0239222
ENSG00000105963.9	ADAP1	-1.88295	0.0265062
ENSG00000197381.11	ADARB1	0.265758	0.00928458
ENSG00000123815.7	ADCK4	-0.392572	0.00026906
ENSG00000173137.7	ADCK5	-0.30903	0.00199263
ENSG00000148700.9	ADD3	0.152451	0.0478814
ENSG00000006831.9	ADIPOR2	0.338231	1.65886e-08
ENSG00000101126.11	ADNP	0.284817	7.22183e-06
ENSG00000259003.1	AE000662.92	0.648037	0.000432236
ENSG00000181026.13	AEN	-0.520663	6.84883e-13
ENSG00000155966.9	AFF2	0.194069	0.0119064
ENSG00000072364.8	AFF4	-0.331179	9.57098e-06
ENSG00000141385.5	AFG3L2	-0.171049	0.02109
ENSG00000183077.11	AFMID	-0.524663	2.54169e-08
ENSG00000119844.10	AFTPH	0.412059	4.08797e-08
ENSG00000038002.4	AGA	0.301445	0.0140374
ENSG00000135439.7	AGAP2	-0.19827	0.031303
ENSG00000133612.14	AGAP3	-0.552466	4.36433e-05
ENSG00000204305.9	AGER	-0.386199	0.0401816
ENSG00000106351.8	AGFG2	-0.840442	1.03372e-17
ENSG00000092847.6	AGO1	-0.165594	0.0448386
ENSG00000169692.8	AGPAT2	-0.235359	0.0239218
ENSG00000155189.7	AGPAT5	0.261055	0.000101676
ENSG00000159723.4	AGRP	-1.29248	0.0225718
ENSG00000153207.10	AHCTF1	0.188135	0.00960422
ENSG00000168710.13	AHCYL1	0.171842	0.025556
ENSG00000126705.9	AHDC1	0.723292	1.23853e-09
ENSG00000112297.10	AIM1	0.260428	9.1441e-05
ENSG00000164022.12	AIMP1	0.247746	0.02711
ENSG00000106305.5	AIMP2	-0.237068	0.0207811
ENSG00000155085.11	AK9	0.510795	0.0010921
ENSG00000131016.12	AKAP12	0.948839	0.00825201
ENSG00000170776.15	AKAP13	0.165859	0.0097195
ENSG00000111254.3	AKAP3	-0.975088	0.00969262
ENSG00000135334.8	AKIRIN2	0.367961	2.57067e-06
ENSG00000204673.6	AKT1S1	1.26616	8.33971e-53
ENSG00000166971.12	AKTIP	-0.4879	4.79487e-05
ENSG00000223474.2	AL020996.1	-2.28675	0.00363912
ENSG00000203863.1	AL079342.1	-0.986146	0.0392147
ENSG00000267848.1	AL118506.1	-1.25089	0.000725197
ENSG00000212670.1	AL161915.1	0.716536	0.0466087
ENSG00000234237.2	AL162431.1	-1.39141	0.0216194
ENSG00000268578.1	AL354718.1	-1.25695	0.00148415
ENSG00000232850.1	AL590708.2	-1.64921	0.037524
ENSG00000269337.1	AL591479.1	-0.698213	0.000986132
ENSG00000269832.1	AL627171.2	-0.629815	0.0205448
ENSG00000023330.10	ALAS1	-0.581926	8.11745e-09
ENSG00000170017.8	ALCAM	0.168051	0.0401816
ENSG00000161618.5	ALDH16A1	-0.192357	0.0379353
ENSG00000184254.12	ALDH1A3	0.45693	0.000703881
ENSG00000111275.8	ALDH2	0.208865	0.0220123
ENSG00000006534.11	ALDH3B1	-0.688235	0.0032326
ENSG00000132746.10	ALDH3B2	0.458931	0.0040068
ENSG00000112294.8	ALDH5A1	0.2079	0.0033326
ENSG00000253710.1	ALG11	-0.35727	0.00145687
ENSG00000182858.9	ALG12	0.397856	0.000621792
ENSG00000172339.9	ALG14	0.813322	4.02472e-13
ENSG00000214160.5	ALG3	-0.295162	0.000217859
ENSG00000100601.5	ALKBH1	0.219782	0.0436105
ENSG00000166199.8	ALKBH3	-0.438269	0.031801
ENSG00000239382.6	ALKBH6	-0.889915	0.000127235
ENSG00000137760.10	ALKBH8	0.716899	1.35828e-18
ENSG00000183684.6	ALYREF	0.180476	0.0344662
ENSG00000242110.3	AMACR	-0.940102	0.0117857
ENSG00000110497.10	AMBRA1	-0.224859	0.00678682
ENSG00000162066.10	AMDHD2	-0.504554	0.00167237
ENSG00000184675.5	AMER1	-0.413087	0.00107461
ENSG00000159461.10	AMFR	0.210076	0.0369808
ENSG00000101935.5	AMMECR1	0.268045	0.000117716
ENSG00000144233.5	AMMECR1L	-0.207324	0.0159809
ENSG00000116337.11	AMPD2	-0.494489	6.03133e-06
ENSG00000133805.11	AMPD3	0.286379	0.00164894
ENSG00000145020.10	AMT	-0.373978	0.0146774
ENSG00000153107.7	ANAPC1	0.152579	0.0334493
ENSG00000164162.8	ANAPC10	-0.292586	0.0186832
ENSG00000196510.8	ANAPC7	0.344448	1.48402e-07
ENSG00000013523.5	ANGEL1	-0.214195	0.0200505
ENSG00000091879.9	ANGPT2	0.416251	0.000279245
ENSG00000116194.8	ANGPTL1	0.257737	0.0338231
ENSG00000136859.5	ANGPTL2	-1.03504	5.76757e-07
ENSG00000167772.7	ANGPTL4	-0.991691	0.000237537
ENSG00000166839.12	ANKDD1A	-0.389208	0.0225718
ENSG00000185722.12	ANKFY1	0.192617	0.0268354
ENSG00000160117.10	ANKLE1	-0.304108	8.4635e-05
ENSG00000176915.10	ANKLE2	0.384144	1.74899e-08
ENSG00000106524.4	ANKMY2	-0.319809	0.00768009
ENSG00000164331.5	ANKRA2	-0.521055	0.00422582
ENSG00000076513.12	ANKRD13A	0.205564	0.00252448
ENSG00000198720.8	ANKRD13B	-0.324767	0.00312098
ENSG00000172932.10	ANKRD13D	0.238628	0.00531602
ENSG00000134461.11	ANKRD16	-0.326024	0.0225706
ENSG00000132466.13	ANKRD17	0.150939	0.0251423
ENSG00000163126.10	ANKRD23	-0.692763	0.0269772
ENSG00000105186.10	ANKRD27	-0.254883	0.00335619
ENSG00000164236.7	ANKRD33B	0.393233	0.00449204
ENSG00000213337.4	ANKRD39	-0.517363	0.000108742
ENSG00000154945.6	ANKRD40	-0.24069	0.00496261
ENSG00000065413.12	ANKRD44	0.154263	0.0464936
ENSG00000168876.4	ANKRD49	-0.304993	0.00359287
ENSG00000139645.9	ANKRD52	-0.312882	3.82428e-05
ENSG00000100124.8	ANKRD54	-0.228333	0.0392359
ENSG00000064999.12	ANKS1A	-0.207997	0.0294144
ENSG00000185046.14	ANKS1B	0.28202	0.00868998
ENSG00000168096.10	ANKS3	-0.97425	4.1965e-19
ENSG00000165138.12	ANKS6	-0.220563	0.026335
ENSG00000163516.9	ANKZF1	-0.54176	5.34085e-09
ENSG00000011426.6	ANLN	0.25081	0.000113063
ENSG00000136938.8	ANP32B	0.184893	0.0294226
ENSG00000177721.3	ANXA2R	-0.542754	0.0022658
ENSG00000222018.1	AP000322.54	1.17508	0.018439
ENSG00000173727.7	AP000769.1	0.439579	0.000212928
ENSG00000235878.4	AP001468.1	0.84101	0.000162094
ENSG00000179038.7	AP001885.1	-0.582038	0.0390331
ENSG00000166747.8	AP1G1	0.288763	7.25619e-06
ENSG00000213983.7	AP1G2	-0.214438	0.0251654
ENSG00000182287.9	AP1S2	0.314697	0.000460536
ENSG00000006125.12	AP2B1	0.19145	0.0246616
ENSG00000042753.7	AP2S1	0.230212	0.0173999
ENSG00000065000.11	AP3D1	-0.209859	0.00559291
ENSG00000070718.7	AP3M2	-0.69997	5.11559e-12
ENSG00000134262.8	AP4B1	-0.301593	0.000673388
ENSG00000254470.2	AP5B1	-0.709174	1.5422e-11
ENSG00000125843.6	AP5S1	0.459544	8.2077e-07
ENSG00000011132.7	APBA3	0.275317	0.0208864
ENSG00000077420.11	APBB1IP	0.203326	0.00321094
ENSG00000113108.13	APBB3	-0.546199	0.00362139
ENSG00000115266.7	APC2	-0.386533	0.000105028
ENSG00000138613.9	APH1B	-0.240311	0.00473839
ENSG00000084234.12	APLP2	0.183438	0.00465454
ENSG00000101474.7	APMAP	-0.195569	0.0494321
ENSG00000184730.6	APOBR	-0.591292	0.0251654
ENSG00000128313.2	APOL5	0.34645	0.0244809
ENSG00000221963.5	APOL6	0.385567	3.2963e-10
ENSG00000178878.8	APOLD1	0.338246	0.00224426
ENSG00000062725.5	APPBP2	-0.259513	0.00575623
ENSG00000136044.7	APPL2	0.508764	4.30346e-10
ENSG00000178301.3	AQP11	-0.686706	0.0103919
ENSG00000186635.10	ARAP1	-0.215931	0.00983489
ENSG00000047365.7	ARAP2	0.188014	0.0401961
ENSG00000101199.8	ARFGAP1	-0.290721	0.00198352
ENSG00000149182.10	ARFGAP2	0.477036	1.52142e-11
ENSG00000124198.8	ARFGEF2	0.192171	0.0163811
ENSG00000132254.8	ARFIP2	0.395982	9.65415e-07
ENSG00000081181.3	ARG2	-0.438728	0.0394848
ENSG00000134884.9	ARGLU1	0.272197	0.00197901
ENSG00000198826.6	ARHGAP11A	0.321135	2.12684e-05
ENSG00000187951.6	ARHGAP11B	0.261203	0.00595901
ENSG00000165322.13	ARHGAP12	-0.246888	0.0217278
ENSG00000075884.8	ARHGAP15	0.188359	0.0360272
ENSG00000140750.12	ARHGAP17	0.377628	9.3036e-08
ENSG00000213390.6	ARHGAP19	0.339257	8.82923e-06
ENSG00000138639.13	ARHGAP24	0.216128	0.0220372
ENSG00000159314.7	ARHGAP27	-0.232477	0.0253414
ENSG00000186517.9	ARHGAP30	0.199068	0.00307636
ENSG00000123329.13	ARHGAP9	0.296471	0.000520544
ENSG00000111348.4	ARHGDIB	0.187774	0.00734973
ENSG00000076928.13	ARHGEF1	0.207168	0.0171737
ENSG00000104880.13	ARHGEF18	0.193527	0.0203475
ENSG00000142632.12	ARHGEF19	-1.04766	2.79786e-15
ENSG00000163947.7	ARHGEF3	0.424476	1.94939e-06
ENSG00000236699.4	ARHGEF38	-0.867804	0.0240065
ENSG00000137135.13	ARHGEF39	0.231752	0.0225451
ENSG00000129675.11	ARHGEF6	0.243939	0.000236301
ENSG00000117713.13	ARID1A	0.159584	0.0294144
ENSG00000049618.17	ARID1B	0.170229	0.0229605
ENSG00000116017.6	ARID3A	-0.206218	0.0356016
ENSG00000032219.14	ARID4A	-0.268385	0.0202109
ENSG00000054267.16	ARID4B	0.226393	0.0290741
ENSG00000196843.11	ARID5A	-0.457418	7.42539e-05
ENSG00000150347.10	ARID5B	0.356929	1.18626e-07
ENSG00000120805.9	ARL1	-0.188779	0.0320949
ENSG00000175414.6	ARL10	-0.482851	0.0346244
ENSG00000169379.11	ARL13B	-0.288218	0.0234996
ENSG00000152219.4	ARL14EP	0.378224	2.97272e-05
ENSG00000185305.6	ARL15	0.15338	0.0491363
ENSG00000185829.11	ARL17A	-0.584808	0.000266752
ENSG00000113966.5	ARL6	0.597396	9.98739e-06
ENSG00000170540.10	ARL6IP1	0.252042	0.00120248
ENSG00000143862.3	ARL8A	-0.477588	2.5783e-05
ENSG00000134108.8	ARL8B	0.267851	0.00089956
ENSG00000125449.2	ARMC7	-0.480296	1.05615e-05
ENSG00000198960.6	ARMCX6	-0.341928	0.0382744
ENSG00000163466.11	ARPC2	0.29688	7.262e-06
ENSG00000172995.12	ARPP21	0.681825	2.28012e-05
ENSG00000105643.5	ARRDC2	-0.430905	9.94622e-05
ENSG00000113369.4	ARRDC3	0.216805	0.0307669
ENSG00000100299.13	ARSA	-0.33367	0.00485971
ENSG00000141337.8	ARSG	0.234512	0.0271054
ENSG00000164291.12	ARSK	0.303134	0.0328603
ENSG00000173409.9	ARV1	-0.306063	0.00536745
ENSG00000099889.9	ARVCF	-0.505754	0.0259106
ENSG00000065802.7	ASB1	-0.275373	0.00168901
ENSG00000100628.7	ASB2	0.468029	1.49207e-08
ENSG00000100325.10	ASCC2	-0.327112	0.000371536
ENSG00000112249.9	ASCC3	0.165048	0.0373415
ENSG00000105011.4	ASF1B	0.202298	0.0419797
ENSG00000116539.6	ASH1L	0.192991	0.0145586
ENSG00000129691.11	ASH2L	0.205966	0.00325265
ENSG00000070669.12	ASNS	0.197023	0.00369939
ENSG00000204653.5	ASPDH	0.996797	6.12773e-05
ENSG00000198363.11	ASPH	0.285182	0.0017675
ENSG00000128203.6	ASPHD2	0.436809	0.00210286
ENSG00000066279.12	ASPM	0.284874	0.000615467
ENSG00000106819.7	ASPN	-0.297682	0.0433095
ENSG00000130707.13	ASS1	1.2452	0.0223294
ENSG00000034533.7	ASTE1	0.364847	0.00117935
ENSG00000171456.12	ASXL1	0.372795	2.10375e-07
ENSG00000138138.9	ATAD1	0.251813	0.0171737
ENSG00000156802.8	ATAD2	0.226998	0.00322203
ENSG00000176208.4	ATAD5	0.21353	0.0210406
ENSG00000137343.13	ATAT1	-0.32213	0.00807756
ENSG00000128272.10	ATF4	0.547931	1.3113e-18
ENSG00000171681.8	ATF7IP	0.233421	0.000700223
ENSG00000126775.8	ATG14	0.423228	9.93182e-05
ENSG00000066739.7	ATG2B	-0.162624	0.0457088
ENSG00000101844.13	ATG4A	0.492326	4.82086e-06
ENSG00000130734.5	ATG4D	-0.454812	7.14463e-05
ENSG00000198925.6	ATG9A	-0.345108	0.00326263
ENSG00000119787.9	ATL2	0.308437	0.000233531
ENSG00000184743.8	ATL3	-0.292184	0.00786265
ENSG00000166454.5	ATMIN	-0.319375	0.000535515
ENSG00000111676.10	ATN1	-0.381137	0.0133587
ENSG00000159363.13	ATP13A2	-0.34449	0.000919625
ENSG00000069849.6	ATP1B3	0.25243	0.000911559
ENSG00000174437.12	ATP2A2	0.153083	0.0409834
ENSG00000074370.13	ATP2A3	0.188799	0.0432082
ENSG00000070961.10	ATP2B1	0.257113	0.000370116
ENSG00000058668.10	ATP2B4	0.359912	0.0133192
ENSG00000152234.11	ATP5A1	0.258112	0.00215284
ENSG00000105341.14	ATP5SL	0.39047	3.73454e-05
ENSG00000185344.9	ATP6V0A2	-0.238572	0.00117935
ENSG00000185883.6	ATP6V0C	-1.19302	0.000686698
ENSG00000159720.7	ATP6V0D1	-0.433946	0.000121937
ENSG00000171130.13	ATP6V0E2	-0.218234	0.0441687
ENSG00000124406.12	ATP8A1	0.343312	1.00117e-06
ENSG00000130770.13	ATPIF1	0.264053	0.0116105
ENSG00000164053.13	ATRIP	-0.420197	4.68358e-05
ENSG00000088812.13	ATRN	-0.314182	0.00418622
ENSG00000107518.12	ATRNL1	0.206396	0.0483419
ENSG00000085224.16	ATRX	0.273159	0.00136943
ENSG00000130638.11	ATXN10	0.304289	0.000107664
ENSG00000224470.3	ATXN1L	-0.164127	0.0399167
ENSG00000066427.17	ATXN3	-0.231171	0.0143263
ENSG00000146776.10	ATXN7L1	-0.501003	2.3977e-05
ENSG00000162650.11	ATXN7L2	-0.449702	0.000289985
ENSG00000127423.6	AUNIP	-0.602973	7.0771e-07
ENSG00000087586.13	AURKA	0.225134	0.00130658
ENSG00000178999.8	AURKB	0.180979	0.0418256
ENSG00000158321.11	AUTS2	0.174962	0.0276559
ENSG00000119986.6	AVPI1	-1.04404	0.0220812
ENSG00000103126.10	AXIN1	-0.274813	0.00564588
ENSG00000168646.8	AXIN2	-0.853158	0.00367564
ENSG00000141577.9	AZI1	-0.453744	1.12474e-06
ENSG00000163512.9	AZI2	0.561534	1.59733e-10
ENSG00000155096.9	AZIN1	0.302598	5.23135e-05
ENSG00000166710.13	B2M	0.270406	0.00482693
ENSG00000162885.8	B3GALNT2	-0.220128	0.0383128
ENSG00000176022.3	B3GALT6	-0.242504	0.0179132
ENSG00000149541.5	B3GAT3	-0.251109	0.00489677
ENSG00000174684.6	B3GNT1	-0.359213	0.0391327
ENSG00000237172.3	B3GNT9	-1.14685	0.00968891
ENSG00000175711.4	B3GNTL1	-0.208821	0.0396354
ENSG00000158850.10	B4GALT3	0.39388	3.4307e-05
ENSG00000121578.8	B4GALT4	-0.523134	0.000791221
ENSG00000158470.5	B4GALT5	0.171955	0.029477
ENSG00000027847.9	B4GALT7	-0.414036	8.53557e-06
ENSG00000123810.3	B9D2	0.352597	0.0179122
ENSG00000105393.11	BABAM1	0.349471	0.00046799
ENSG00000186318.12	BACE1	-0.401284	0.00760964
ENSG00000151929.5	BAG3	-0.816942	2.88877e-05
ENSG00000166170.9	BAG5	0.149444	0.0455639
ENSG00000140320.7	BAHD1	-0.826664	7.37897e-27
ENSG00000006453.9	BAIAP2L1	-1.40102	0.0324831
ENSG00000007516.9	BAIAP3	-0.850715	0.00611778
ENSG00000030110.8	BAK1	-0.390824	0.000319835
ENSG00000138376.6	BARD1	0.315468	8.02086e-06
ENSG00000176788.7	BASP1	0.329744	0.00173842
ENSG00000087088.15	BAX	0.284905	0.00195176
ENSG00000009954.6	BAZ1B	0.17319	0.0142797
ENSG00000214413.3	BBIP1	0.859743	1.24261e-21
ENSG00000179941.6	BBS10	-0.539086	0.000192313
ENSG00000181004.5	BBS12	-0.794048	0.0230265
ENSG00000125124.7	BBS2	-0.502168	1.79097e-06
ENSG00000050820.12	BCAR1	-1.05695	1.38459e-12
ENSG00000137936.12	BCAR3	0.637888	3.57013e-11
ENSG00000064787.8	BCAS1	0.766456	0.000669237
ENSG00000060982.10	BCAT1	0.25774	0.000560146
ENSG00000186666.4	BCDIN3D	-0.650632	0.000126602
ENSG00000119866.16	BCL11A	0.42295	9.6931e-11
ENSG00000153094.17	BCL2L11	0.362707	1.7725e-06
ENSG00000113916.13	BCL6	0.180221	0.015451
ENSG00000116128.5	BCL9	-0.548175	2.61614e-09
ENSG00000029363.11	BCLAF1	0.346181	6.03133e-06
ENSG00000183337.12	BCOR	0.263343	0.000704416
ENSG00000085185.11	BCORL1	-0.805301	3.99325e-08
ENSG00000161267.7	BDH1	-0.329889	1.06522e-05
ENSG00000145734.14	BDP1	0.313104	0.000678183
ENSG00000178409.9	BEND3	0.340748	6.76829e-05
ENSG00000177951.13	BET1L	-0.474062	2.23413e-07
ENSG00000170819.4	BFSP2	0.57562	3.69392e-07
ENSG00000100290.2	BIK	0.274862	0.00686909
ENSG00000023445.9	BIRC3	0.445766	2.27403e-08
ENSG00000089685.10	BIRC5	0.216836	0.0165997
ENSG00000166619.8	BLCAP	-0.196978	0.0407915
ENSG00000095585.12	BLNK	0.312157	8.04481e-06
ENSG00000189114.6	BLOC1S3	-1.17425	3.41916e-21
ENSG00000186222.3	BLOC1S4	-0.465711	0.00034967
ENSG00000138756.13	BMP2K	0.366468	2.66471e-07
ENSG00000152785.6	BMP3	0.24801	0.000109411
ENSG00000153162.8	BMP6	0.255293	0.00330031
ENSG00000113734.13	BNIP1	0.516467	5.89381e-07
ENSG00000140299.7	BNIP2	0.317505	1.56589e-05
ENSG00000104765.10	BNIP3L	0.215075	0.0189801
ENSG00000163141.14	BNIPL	-1.22248	0.00199876
ENSG00000145919.6	BOD1	0.271135	0.00181556
ENSG00000038219.8	BOD1L1	0.194426	0.0271468
ENSG00000176720.3	BOK	1.30491	2.68484e-06
ENSG00000172331.7	BPGM	0.226582	0.0205188
ENSG00000162813.13	BPNT1	0.306245	4.91074e-06
ENSG00000171634.12	BPTF	0.291715	5.90445e-06
ENSG00000012048.15	BRCA1	0.322511	1.63601e-05
ENSG00000139618.10	BRCA2	0.233906	0.00792763
ENSG00000100425.14	BRD1	-0.338919	2.71142e-05
ENSG00000204256.8	BRD2	0.352821	1.19791e-08
ENSG00000169925.12	BRD3	-0.713459	6.99552e-09
ENSG00000112983.13	BRD8	0.349082	5.76199e-07
ENSG00000185024.11	BRF1	-0.586267	5.65267e-12
ENSG00000104221.8	BRF2	-0.700813	1.82009e-06
ENSG00000184992.10	BRI3BP	0.27114	9.8304e-06
ENSG00000136492.4	BRIP1	0.193397	0.0174387
ENSG00000113460.8	BRIX1	0.506395	4.15923e-08
ENSG00000162819.7	BROX	0.562284	2.67173e-15
ENSG00000168000.10	BSCL2	0.731769	2.18032e-09
ENSG00000160058.14	BSDC1	-0.559478	8.04083e-11
ENSG00000164061.4	BSN	-0.775682	1.27935e-06
ENSG00000222009.4	BTBD19	-1.09153	0.00301131
ENSG00000184887.9	BTBD6	-0.452179	0.00513087
ENSG00000189195.5	BTBD8	-0.993132	0.000193372
ENSG00000133639.3	BTG1	0.196376	0.00652785
ENSG00000159388.5	BTG2	0.188109	0.00746036
ENSG00000154640.10	BTG3	0.301355	0.00434441
ENSG00000186265.5	BTLA	0.30187	0.0034845
ENSG00000112763.11	BTN2A1	-0.315818	0.000978138
ENSG00000186470.9	BTN3A2	0.210386	0.00889592
ENSG00000111801.11	BTN3A3	0.331722	0.00500479
ENSG00000204290.6	BTNL2	1.03002	0.00847761
ENSG00000169679.10	BUB1	0.368357	4.26748e-10
ENSG00000156970.8	BUB1B	0.273552	9.08751e-05
ENSG00000154473.13	BUB3	0.374879	5.82373e-09
ENSG00000137656.7	BUD13	0.204097	0.0117267
ENSG00000005379.11	BZRAP1	0.600197	2.50371e-11
ENSG00000082153.13	BZW1	0.238016	0.00683393
ENSG00000165813.12	C10orf118	-0.294492	0.008203
ENSG00000107938.13	C10orf137	0.384219	1.38051e-09
ENSG00000107815.3	C10orf2	-0.655122	1.64312e-12
ENSG00000171067.6	C11orf24	0.239559	0.0102397
ENSG00000158636.12	C11orf30	1.14145	4.80338e-56
ENSG00000185522.4	C11orf35	-0.529383	0.0493689
ENSG00000180878.2	C11orf42	-0.947856	0.00581657
ENSG00000149179.9	C11orf49	0.288038	0.000823491
ENSG00000175573.6	C11orf68	-0.538054	9.07697e-05
ENSG00000165490.8	C11orf82	0.24714	0.00534521
ENSG00000168005.4	C11orf84	-0.444916	7.94707e-10
ENSG00000157895.7	C12orf43	0.841739	8.09479e-27
ENSG00000078237.4	C12orf5	-0.406404	0.00131793
ENSG00000130921.3	C12orf65	-0.231576	0.0232133
ENSG00000174206.8	C12orf66	-0.251307	0.0103511
ENSG00000204954.5	C12orf73	-0.585012	1.44333e-05
ENSG00000235162.4	C12orf75	0.209306	0.0111408
ENSG00000174456.9	C12orf76	0.61159	2.24524e-14
ENSG00000226397.3	C12orf77	0.785349	5.09801e-24
ENSG00000133935.6	C14orf1	0.25956	0.00940384
ENSG00000133943.16	C14orf159	-0.175751	0.0429054
ENSG00000179476.3	C14orf28	-0.547379	0.016581
ENSG00000169758.8	C15orf27	-0.560946	0.0374651
ENSG00000167173.14	C15orf39	-0.39174	0.000109379
ENSG00000188549.8	C15orf52	-1.26488	0.0381519
ENSG00000128891.11	C15orf57	-0.341946	0.00403819
ENSG00000188277.8	C15orf62	0.313779	0.0353237
ENSG00000221819.2	C16orf3	-0.967308	0.0454832
ENSG00000140688.12	C16orf58	-0.265752	0.00878411
ENSG00000162062.10	C16orf59	-0.289953	0.00331426
ENSG00000125149.7	C16orf70	-0.817717	4.72593e-15
ENSG00000166246.9	C16orf71	-1.66742	0.00200479
ENSG00000070761.3	C16orf80	-0.226189	0.0273567
ENSG00000154035.6	C17orf103	0.816197	9.07277e-06
ENSG00000180336.13	C17orf104	0.37198	0.0468062
ENSG00000212719.6	C17orf51	-0.891751	9.73752e-12
ENSG00000125319.10	C17orf53	-0.690826	9.1925e-11
ENSG00000196544.6	C17orf59	-0.779451	2.52931e-07
ENSG00000178927.12	C17orf62	0.269218	0.00242084
ENSG00000214226.4	C17orf67	-0.495249	0.000685664
ENSG00000185504.12	C17orf70	-0.449483	7.98564e-06
ENSG00000108666.5	C17orf75	-0.254566	0.0260251
ENSG00000141219.11	C17orf80	-0.358574	2.83656e-05
ENSG00000074356.12	C17orf85	0.239767	0.00426256
ENSG00000179294.5	C17orf96	-0.568953	8.08961e-12
ENSG00000141428.12	C18orf21	-0.279447	0.0124411
ENSG00000152242.6	C18orf25	0.251241	0.00164383
ENSG00000074842.3	C19orf10	0.240752	0.0122766
ENSG00000131943.13	C19orf12	-0.781836	3.24834e-09
ENSG00000228300.9	C19orf24	0.44778	2.84232e-05
ENSG00000119559.11	C19orf25	-0.30517	0.000904256
ENSG00000123144.6	C19orf43	0.221948	0.0101675
ENSG00000105072.4	C19orf44	1.32694	9.73162e-33
ENSG00000167747.9	C19orf48	0.451187	5.83199e-09
ENSG00000142444.6	C19orf52	-0.308272	0.00834579
ENSG00000006015.13	C19orf60	-0.245026	0.00599994
ENSG00000185453.8	C19orf68	0.553686	3.11898e-07
ENSG00000000460.12	C1orf112	0.233801	0.00391861
ENSG00000162384.9	C1orf123	-0.273904	0.00399396
ENSG00000131591.13	C1orf159	-0.273995	0.029477
ENSG00000175707.7	C1orf172	-1.2972	0.00460952
ENSG00000198912.6	C1orf174	0.385722	1.01614e-05
ENSG00000196533.6	C1orf186	0.312948	0.00216348
ENSG00000119280.12	C1orf198	-0.437356	0.0377728
ENSG00000179840.5	C1orf200	-0.470845	0.027698
ENSG00000213057.4	C1orf220	0.446554	0.0149693
ENSG00000162757.3	C1orf74	-0.389971	0.0227745
ENSG00000198715.7	C1orf85	0.791508	0.0117786
ENSG00000133466.9	C1QTNF6	-1.20229	9.08751e-05
ENSG00000182326.10	C1S	0.998523	0.00564771
ENSG00000160221.12	C21orf33	-0.302224	0.000135096
ENSG00000160298.13	C21orf58	0.253995	0.0059392
ENSG00000154642.6	C21orf91	0.258341	0.0127561
ENSG00000169314.10	C22orf15	-1.19631	2.06921e-12
ENSG00000215012.4	C22orf29	-0.550272	1.73609e-11
ENSG00000184208.10	C22orf46	-0.46841	0.000460004
ENSG00000172375.8	C2CD2L	-0.744018	4.52179e-14
ENSG00000168014.12	C2CD3	0.734499	3.48747e-24
ENSG00000273045.1	C2ORF15	-1.01243	0.00226149
ENSG00000221843.2	C2orf16	-0.696977	0.0356119
ENSG00000115998.3	C2orf42	0.725671	1.44348e-15
ENSG00000163026.7	C2orf44	0.463203	2.05437e-06
ENSG00000162972.6	C2orf47	0.246785	0.044106
ENSG00000186132.10	C2orf76	0.275678	0.0152803
ENSG00000131379.5	C3orf20	0.510901	3.78239e-10
ENSG00000179021.5	C3orf38	0.198342	0.0418492
ENSG00000114529.8	C3orf52	0.287699	0.000912424
ENSG00000225526.4	C3orf83	-0.839248	0.00016508
ENSG00000106804.6	C5	0.305334	0.0120798
ENSG00000161010.10	C5orf45	-0.765538	1.66769e-15
ENSG00000205765.4	C5orf51	-0.184829	0.0249634
ENSG00000204564.7	C6orf136	-0.539152	2.61433e-07
ENSG00000203872.6	C6orf163	-0.476866	0.039493
ENSG00000130349.5	C6orf203	-0.553718	2.22608e-05
ENSG00000181577.11	C6orf223	0.705313	5.18514e-14
ENSG00000204439.3	C6orf47	-0.50091	0.000390611
ENSG00000146826.10	C7orf43	-0.392583	5.06383e-05
ENSG00000146963.13	C7orf55-LUC7L2	0.256537	0.00536503
ENSG00000164603.7	C7orf60	-0.602799	1.67683e-06
ENSG00000184608.4	C8orf12	0.173396	0.0414448
ENSG00000169085.7	C8orf46	0.786321	0.0285663
ENSG00000213563.2	C8orf82	-0.278635	0.0057577
ENSG00000198917.7	C9orf114	-0.484138	2.47448e-09
ENSG00000148362.6	C9orf142	-0.331214	0.00131372
ENSG00000196366.1	C9orf163	-0.848117	0.0029768
ENSG00000197768.6	C9orf173	-0.875175	0.0187592
ENSG00000135045.6	C9orf40	0.175102	0.0267131
ENSG00000147894.10	C9orf72	-0.701851	3.5174e-09
ENSG00000165181.12	C9orf84	-0.900753	0.0166373
ENSG00000165233.13	C9orf89	-0.408022	0.012184
ENSG00000157693.10	C9orf91	0.204942	0.00594614
ENSG00000198870.6	C9orf96	-0.724924	9.21665e-05
ENSG00000118298.6	CA14	-0.765917	0.009681
ENSG00000169239.8	CA5B	-0.427975	0.0368514
ENSG00000178538.5	CA8	0.421911	0.000380154
ENSG00000102547.14	CAB39L	0.686838	6.70684e-10
ENSG00000007402.7	CACNA2D2	1.08136	0.000190186
ENSG00000067191.11	CACNB1	-0.669642	2.20103e-08
ENSG00000105298.9	CACTIN	-0.231659	0.0152238
ENSG00000116161.13	CACYBP	0.202678	0.0324811
ENSG00000084774.9	CAD	0.224885	0.025114
ENSG00000182985.12	CADM1	0.205839	0.00418483
ENSG00000105767.2	CADM4	-1.09356	0.0262384
ENSG00000163618.13	CADPS	0.232459	0.000615784
ENSG00000012822.11	CALCOCO1	0.698558	0.0369625
ENSG00000138172.6	CALHM2	-0.549563	0.000680797
ENSG00000198668.6	CALM1	0.226441	0.000603848
ENSG00000143933.12	CALM2	0.279646	7.2462e-05
ENSG00000183049.8	CAMK1D	0.222876	0.00366776
ENSG00000145349.12	CAMK2D	0.29715	5.02512e-05
ENSG00000148660.16	CAMK2G	-0.295127	0.00190055
ENSG00000152495.6	CAMK4	0.181248	0.0186577
ENSG00000164615.3	CAMLG	-0.301516	0.0031537
ENSG00000130559.14	CAMSAP1	-0.266053	0.000646553
ENSG00000076826.5	CAMSAP3	-0.551554	0.00590733
ENSG00000108509.16	CAMTA2	-0.358991	0.000603248
ENSG00000144712.7	CAND2	0.415322	0.0114785
ENSG00000171302.12	CANT1	0.312947	0.00120225
ENSG00000127022.10	CANX	0.174177	0.00606914
ENSG00000131236.12	CAP1	0.312344	2.36856e-06
ENSG00000142330.15	CAPN10	0.266513	0.00208628
ENSG00000214711.5	CAPN14	1.0684	0.000135425
ENSG00000131375.5	CAPN7	-0.288185	0.000284647
ENSG00000135387.15	CAPRIN1	0.228189	0.000704416
ENSG00000110888.13	CAPRIN2	-0.239035	0.0112842
ENSG00000105519.8	CAPS	-0.511549	0.00358755
ENSG00000116489.8	CAPZA1	0.237974	0.00158858
ENSG00000077549.13	CAPZB	0.200967	0.00570085
ENSG00000138380.13	CARF	-0.353318	0.000917089
ENSG00000110619.12	CARS	0.364321	6.73228e-07
ENSG00000137812.15	CASC5	0.241231	0.014645
ENSG00000167971.14	CASKIN1	0.812639	0.00824254
ENSG00000228146.2	CASP16	-1.87962	7.10489e-08
ENSG00000164305.13	CASP3	0.22805	0.00743829
ENSG00000132906.13	CASP9	-0.345772	0.00612778
ENSG00000130940.10	CASZ1	-0.738432	0.00114063
ENSG00000166762.12	CATSPER2	-0.477529	0.00341225
ENSG00000099338.18	CATSPERG	-0.4708	0.0316007
ENSG00000078699.17	CBFA2T2	-0.224207	0.0261739
ENSG00000067955.9	CBFB	0.156957	0.0296211
ENSG00000105879.7	CBLL1	0.584731	7.69063e-21
ENSG00000145439.7	CBR4	-0.332018	0.00175293
ENSG00000173894.6	CBX2	-0.702021	1.63576e-17
ENSG00000122565.14	CBX3	0.266358	0.00054861
ENSG00000094916.9	CBX5	0.230952	0.000139027
ENSG00000100307.8	CBX7	-0.529742	6.97439e-07
ENSG00000141570.6	CBX8	-0.682508	7.71848e-10
ENSG00000204659.4	CBY3	-1.71651	0.00539072
ENSG00000154222.10	CC2D1B	-0.418434	2.40533e-06
ENSG00000158941.12	CCAR2	0.20055	0.0140616
ENSG00000171097.9	CCBL1	0.58513	9.65415e-07
ENSG00000176476.4	CCDC101	-0.927013	1.80938e-23
ENSG00000005059.11	CCDC109B	0.182958	0.0270881
ENSG00000168491.5	CCDC110	0.310474	0.000805885
ENSG00000136710.5	CCDC115	0.349804	4.38091e-05
ENSG00000160799.7	CCDC12	0.219298	0.0166626
ENSG00000147144.8	CCDC120	-0.775318	0.00719664
ENSG00000151773.8	CCDC122	0.35895	0.00376242
ENSG00000104957.9	CCDC130	-0.353298	8.04725e-05
ENSG00000100147.9	CCDC134	-0.245201	0.0448906
ENSG00000128596.12	CCDC136	-0.476492	1.84594e-08
ENSG00000185298.8	CCDC137	-0.302261	0.000351695
ENSG00000163492.9	CCDC141	0.368462	2.97655e-06
ENSG00000135637.9	CCDC142	0.962639	3.11273e-41
ENSG00000149548.10	CCDC15	-0.390146	0.00164645
ENSG00000198003.7	CCDC151	1.6017	0.0017815
ENSG00000183401.7	CCDC159	-0.498594	0.00493247
ENSG00000236624.4	CCDC163P	-0.42711	0.000645144
ENSG00000159588.10	CCDC17	0.555188	6.19542e-06
ENSG00000101997.8	CCDC22	-0.567054	1.70926e-06
ENSG00000180329.9	CCDC43	0.384827	4.13299e-05
ENSG00000152492.9	CCDC50	0.39548	0.0357805
ENSG00000164051.9	CCDC51	-0.218448	0.0295053
ENSG00000160124.5	CCDC58	0.408485	0.00106049
ENSG00000108091.10	CCDC6	0.292413	9.51562e-06
ENSG00000104983.4	CCDC61	-0.250546	0.0254935
ENSG00000180376.12	CCDC66	-0.390678	0.000126784
ENSG00000198624.8	CCDC69	0.249748	0.000115596
ENSG00000177352.9	CCDC71	0.231052	0.029093
ENSG00000253276.1	CCDC71L	-0.436999	0.000225871
ENSG00000186166.4	CCDC84	-0.208893	0.0397562
ENSG00000110104.7	CCDC86	-0.470528	1.94141e-07
ENSG00000182791.3	CCDC87	-2.33806	0.0182214
ENSG00000115355.11	CCDC88A	0.343119	0.000465188
ENSG00000105321.8	CCDC9	-0.56146	5.82433e-06
ENSG00000119242.4	CCDC92	-0.41077	0.0336437
ENSG00000105248.11	CCDC94	0.275261	0.00235013
ENSG00000136280.11	CCM2	0.253614	0.000238102
ENSG00000145386.5	CCNA2	0.417037	9.40345e-11
ENSG00000134057.10	CCNB1	0.349409	2.25614e-06
ENSG00000157456.3	CCNB2	0.257681	0.0003365
ENSG00000105173.9	CCNE1	-0.439941	1.76103e-06
ENSG00000175305.12	CCNE2	0.225048	0.00929872
ENSG00000113328.14	CCNG1	0.233693	0.0187425
ENSG00000138764.9	CCNG2	0.523595	4.25323e-16
ENSG00000118816.5	CCNI	0.285315	2.94789e-05
ENSG00000107443.11	CCNJ	-0.308928	0.00187385
ENSG00000163660.7	CCNL1	0.545541	1.21054e-16
ENSG00000221978.7	CCNL2	0.448699	5.88568e-09
ENSG00000082258.8	CCNT2	0.891933	5.2367e-39
ENSG00000103540.12	CCP110	1.02317	1.09215e-54
ENSG00000151014.4	CCRN4L	-0.381131	0.00139493
ENSG00000154429.6	CCSAP	-0.467404	4.69179e-06
ENSG00000163468.10	CCT3	0.177855	0.0085887
ENSG00000115484.10	CCT4	0.259419	0.000231319
ENSG00000150753.7	CCT5	0.321655	2.0139e-05
ENSG00000156261.8	CCT8	0.225946	0.0041346
ENSG00000122674.8	CCZ1	-0.241446	0.0404576
ENSG00000146574.11	CCZ1B	-0.249993	0.0167631
ENSG00000177697.13	CD151	-0.46394	0.00983489
ENSG00000134061.4	CD180	0.511233	3.88273e-11
ENSG00000158481.8	CD1C	1.06936	6.38986e-25
ENSG00000158473.6	CD1D	0.447286	0.000153031
ENSG00000012124.10	CD22	0.348628	4.6053e-06
ENSG00000178562.13	CD28	0.764273	4.23514e-06
ENSG00000198087.7	CD2AP	0.256766	0.00387163
ENSG00000169217.4	CD2BP2	0.430789	3.19074e-11
ENSG00000104894.7	CD37	0.138357	0.0470626
ENSG00000004468.8	CD38	0.24329	0.000206265
ENSG00000117877.6	CD3EAP	-1.15719	1.83271e-13
ENSG00000117335.14	CD46	0.407524	6.5582e-08
ENSG00000117091.5	CD48	0.385574	6.2842e-07
ENSG00000143119.8	CD53	0.336056	2.68039e-07
ENSG00000110848.4	CD69	0.716234	3.83212e-10
ENSG00000137101.8	CD72	0.551935	5.898e-11
ENSG00000019582.10	CD74	0.171469	0.0482418
ENSG00000112149.5	CD83	0.249783	0.0234996
ENSG00000066294.10	CD84	0.430464	1.0672e-05
ENSG00000140326.8	CDAN1	-0.262349	0.0056297
ENSG00000079335.13	CDC14A	-0.539556	0.00718486
ENSG00000117399.9	CDC20	0.247211	0.0122274
ENSG00000176386.4	CDC26	0.727988	2.42042e-12
ENSG00000106993.7	CDC37L1	-0.348878	0.00716544
ENSG00000168438.10	CDC40	0.329785	0.000230921
ENSG00000171219.8	CDC42BPG	-0.690269	2.10582e-06
ENSG00000163171.6	CDC42EP3	0.326536	0.022183
ENSG00000158985.9	CDC42SE2	0.169448	0.0303911
ENSG00000093009.5	CDC45	0.302719	2.20179e-05
ENSG00000094804.5	CDC6	0.695996	6.4941e-29
ENSG00000097046.8	CDC7	0.250532	0.00134131
ENSG00000184661.9	CDCA2	0.344329	1.30329e-05
ENSG00000170779.10	CDCA4	0.229078	0.00414815
ENSG00000146670.5	CDCA5	0.21079	0.00805823
ENSG00000144354.9	CDCA7	0.389032	1.35412e-10
ENSG00000134690.6	CDCA8	0.297035	0.000400055
ENSG00000074276.6	CDHR2	-0.6063	0.00981177
ENSG00000089486.12	CDIP1	-0.775232	8.73014e-06
ENSG00000170312.11	CDK1	0.325062	4.83566e-05
ENSG00000185324.17	CDK10	0.217176	0.021216
ENSG00000167258.9	CDK12	0.212641	0.000958641
ENSG00000058091.12	CDK14	0.27934	1.35275e-05
ENSG00000155111.10	CDK19	0.220582	0.00386028
ENSG00000176749.4	CDK5R1	0.574153	0.000487915
ENSG00000136861.13	CDK5RAP2	-0.201061	0.00612813
ENSG00000108465.10	CDK5RAP3	-0.185488	0.0220201
ENSG00000105810.5	CDK6	0.25444	0.00028975
ENSG00000136807.7	CDK9	0.353878	9.22125e-06
ENSG00000145996.7	CDKAL1	0.177154	0.0367126
ENSG00000008086.6	CDKL5	-0.729657	0.0175777
ENSG00000124762.9	CDKN1A	1.15846	1.83075e-18
ENSG00000168564.5	CDKN2AIP	0.22723	0.0043083
ENSG00000147883.9	CDKN2B	0.314559	0.0162915
ENSG00000123080.6	CDKN2C	0.312252	4.92956e-05
ENSG00000100526.15	CDKN3	0.244167	0.0146774
ENSG00000205643.6	CDPF1	-0.560986	0.000113237
ENSG00000091527.11	CDV3	0.204565	0.00219019
ENSG00000153046.13	CDYL	0.206681	0.00347019
ENSG00000007129.13	CEACAM21	0.421513	2.19475e-05
ENSG00000093072.11	CECR1	0.258797	0.00308167
ENSG00000149187.13	CELF1	0.204643	0.00380375
ENSG00000008300.10	CELSR3	-0.325594	0.00229649
ENSG00000184524.5	CEND1	-0.433605	3.70277e-07
ENSG00000145241.6	CENPC	0.309671	0.000363231
ENSG00000138778.7	CENPE	0.262574	0.0124548
ENSG00000117724.8	CENPF	0.297787	0.00112249
ENSG00000102384.9	CENPI	0.357643	8.1523e-06
ENSG00000120334.11	CENPL	0.348444	3.72453e-06
ENSG00000138092.6	CENPO	0.410989	2.82773e-08
ENSG00000103995.9	CEP152	0.44786	4.03305e-06
ENSG00000110274.10	CEP164	0.165756	0.0329575
ENSG00000143702.11	CEP170	-0.243832	0.00822915
ENSG00000106477.14	CEP41	0.197173	0.0117857
ENSG00000114107.4	CEP70	0.312549	0.00207659
ENSG00000112877.6	CEP72	-0.243456	0.00586553
ENSG00000121289.13	CEP89	0.631246	9.58715e-15
ENSG00000182504.6	CEP97	0.51199	6.48912e-12
ENSG00000134255.9	CEPT1	0.228919	0.00322326
ENSG00000188452.9	CERKL	0.35951	0.00138256
ENSG00000139624.8	CERS5	-0.219729	0.0234562
ENSG00000172831.7	CES2	-0.485448	1.76627e-07
ENSG00000153140.4	CETN3	-0.25096	0.0472133
ENSG00000172757.8	CFL1	0.265374	0.000211435
ENSG00000126759.8	CFP	-0.829539	0.0463645
ENSG00000143375.10	CGN	-0.623643	0.000887861
ENSG00000128965.7	CHAC1	1.25951	1.06222e-16
ENSG00000198824.4	CHAMP1	0.193469	0.00817155
ENSG00000163528.8	CHCHD4	-0.604784	1.27449e-10
ENSG00000159685.6	CHCHD6	1.04625	2.55689e-08
ENSG00000153922.6	CHD1	-0.642056	9.04238e-06
ENSG00000173575.14	CHD2	0.359182	4.11156e-06
ENSG00000124177.10	CHD6	-0.342501	4.16773e-05
ENSG00000177200.11	CHD9	0.217081	0.00391779
ENSG00000149554.8	CHEK1	0.267148	0.000406299
ENSG00000064886.9	CHI3L2	0.578915	4.17967e-06
ENSG00000177830.13	CHID1	-0.229013	0.0117521
ENSG00000133063.11	CHIT1	0.851947	7.73613e-12
ENSG00000131165.10	CHMP1A	0.212116	0.0158926
ENSG00000254505.4	CHMP4A	-0.414399	0.0344838
ENSG00000101421.3	CHMP4B	0.221803	0.0117964
ENSG00000123989.9	CHPF	-0.80412	1.45247e-12
ENSG00000033100.10	CHPF2	-0.325646	0.000223847
ENSG00000104472.5	CHRAC1	0.38876	1.01312e-07
ENSG00000169684.9	CHRNA5	-0.526719	0.0404534
ENSG00000170175.6	CHRNB1	-0.658583	0.0146275
ENSG00000160716.4	CHRNB2	-0.42629	0.0437959
ENSG00000196811.7	CHRNG	-0.470909	0.000812005
ENSG00000115526.6	CHST10	-0.316594	0.00389488
ENSG00000169105.6	CHST14	-0.782245	2.90965e-06
ENSG00000140835.8	CHST4	0.350993	0.0475119
ENSG00000147119.3	CHST7	-0.46324	0.0122785
ENSG00000127586.12	CHTF18	-0.223805	0.0239111
ENSG00000179583.13	CIITA	0.275948	0.000711262
ENSG00000099622.9	CIRBP	0.153666	0.0390671
ENSG00000136108.10	CKAP2	0.376241	8.9496e-07
ENSG00000169607.8	CKAP2L	0.403163	3.17886e-07
ENSG00000175216.10	CKAP5	0.233713	0.000182751
ENSG00000217555.8	CKLF	-0.494228	0.0156242
ENSG00000237289.5	CKMT1B	-0.429591	0.0281004
ENSG00000131730.11	CKMT2	-0.630462	0.000362621
ENSG00000123975.4	CKS2	0.241786	0.0232888
ENSG00000104859.10	CLASRP	-0.190033	0.0245575
ENSG00000114859.10	CLCN2	-0.692637	0.0019184
ENSG00000073464.7	CLCN4	0.335791	3.24478e-05
ENSG00000011021.17	CLCN6	0.669637	8.56798e-14
ENSG00000103249.13	CLCN7	-0.228429	0.0383213
ENSG00000157224.11	CLDN12	-0.892376	9.15604e-07
ENSG00000171217.5	CLDN20	-0.450262	0.00366679
ENSG00000165215.5	CLDN3	-1.58547	0.0087415
ENSG00000080822.12	CLDND1	0.316776	4.6754e-05
ENSG00000160318.2	CLDND2	-1.13155	0.00623896
ENSG00000038532.10	CLEC16A	0.162668	0.042473
ENSG00000187912.7	CLEC17A	0.699399	4.51935e-09
ENSG00000069493.10	CLEC2D	0.209821	0.00867476
ENSG00000184293.3	CLECL1	0.392026	0.00183858
ENSG00000162994.11	CLHC1	0.494549	0.000898212
ENSG00000213719.4	CLIC1	0.161711	0.0237054
ENSG00000169583.12	CLIC3	-1.04256	0.00689738
ENSG00000169504.10	CLIC4	0.182682	0.00565318
ENSG00000113282.9	CLINT1	0.163511	0.0155415
ENSG00000105270.10	CLIP3	-1.09885	8.54594e-15
ENSG00000013441.11	CLK1	0.429212	1.50337e-07
ENSG00000102805.9	CLN5	-0.250993	0.0135694
ENSG00000182372.6	CLN8	-0.748081	3.68851e-14
ENSG00000172409.5	CLP1	-0.264077	0.0174387
ENSG00000162129.8	CLPB	0.226318	0.0105854
ENSG00000125656.4	CLPP	0.223417	0.0137922
ENSG00000049656.9	CLPTM1L	0.198396	0.0430277
ENSG00000171603.12	CLSTN1	0.221859	0.00500982
ENSG00000141367.7	CLTC	0.212584	0.00375883
ENSG00000162368.9	CMPK1	0.265206	0.00300279
ENSG00000180917.12	CMTR2	-0.757971	7.0709e-14
ENSG00000169714.12	CNBP	0.246705	0.0079995
ENSG00000133313.10	CNDP2	-0.217188	0.0142803
ENSG00000205423.7	CNEP1R1	-0.278206	0.014645
ENSG00000142675.13	CNKSR1	-0.743852	0.0034845
ENSG00000168763.11	CNNM3	-0.331921	0.000720199
ENSG00000125107.12	CNOT1	0.294599	2.54613e-05
ENSG00000182973.14	CNOT10	0.1861	0.0315251
ENSG00000111596.7	CNOT2	0.376949	4.7777e-09
ENSG00000080802.14	CNOT4	0.226697	0.00770172
ENSG00000138767.8	CNOT6L	0.298886	8.30795e-05
ENSG00000257727.1	CNPY2	-0.618348	0.0015384
ENSG00000166997.3	CNPY4	-0.310041	0.0126405
ENSG00000242689.1	CNTF	0.690158	4.74181e-05
ENSG00000108797.7	CNTNAP1	-0.280854	0.0457091
ENSG00000119397.12	CNTRL	0.340507	4.26728e-05
ENSG00000183978.7	COA3	-0.336059	0.00344538
ENSG00000181924.6	COA4	-0.193417	0.0390873
ENSG00000183513.4	COA5	-0.31874	0.00305158
ENSG00000121058.4	COIL	0.255639	0.019265
ENSG00000197565.11	COL4A6	1.24801	0.000254003
ENSG00000170619.8	COMMD5	-0.38912	0.000854809
ENSG00000110442.7	COMMD9	0.272231	0.0194442
ENSG00000165644.6	COMTD1	-0.302277	0.00281188
ENSG00000141030.8	COPS3	0.256205	0.00149451
ENSG00000121022.9	COPS5	0.198698	0.0402778
ENSG00000135469.9	COQ10A	-0.83921	1.71375e-12
ENSG00000115520.4	COQ10B	-0.678285	3.00523e-09
ENSG00000119723.11	COQ6	-0.933149	2.05861e-07
ENSG00000167186.6	COQ7	0.279343	0.00879969
ENSG00000088682.9	COQ9	0.237135	0.0127976
ENSG00000102879.11	CORO1A	0.189927	0.0293069
ENSG00000110880.6	CORO1C	0.25886	2.90326e-05
ENSG00000103187.6	COTL1	0.178497	0.019101
ENSG00000006695.6	COX10	0.384119	4.86448e-05
ENSG00000240230.1	COX19	0.309422	0.00035283
ENSG00000161281.6	COX7A1	-2.18146	0.000318736
ENSG00000080618.9	CPB2	-0.747038	0.0313699
ENSG00000113742.8	CPEB4	0.508009	4.99653e-14
ENSG00000124772.7	CPNE5	0.338761	0.000774748
ENSG00000100884.5	CPNE6	-0.829335	0.0216973
ENSG00000080819.2	CPOX	-0.57576	4.63618e-09
ENSG00000165934.8	CPSF2	0.237446	0.00131609
ENSG00000160917.10	CPSF4	0.166951	0.019366
ENSG00000149532.11	CPSF7	0.314299	1.28722e-06
ENSG00000205560.8	CPT1B	-0.467055	0.0271054
ENSG00000157184.5	CPT2	-0.369598	0.000207521
ENSG00000117322.12	CR2	0.773708	2.86049e-25
ENSG00000007545.11	CRAMP1L	-0.75574	9.89619e-14
ENSG00000107175.6	CREB3	1.03762	8.4623e-29
ENSG00000146592.12	CREB5	0.240545	0.00481805
ENSG00000111269.2	CREBL2	-0.464344	0.0152703
ENSG00000163703.13	CRELD1	-0.681504	8.96427e-10
ENSG00000145708.6	CRHBP	0.281638	0.0209308
ENSG00000150938.5	CRIM1	0.222492	0.00146221
ENSG00000179979.7	CRIPAK	-0.312658	0.045504
ENSG00000167193.7	CRK	0.379659	1.67504e-06
ENSG00000058453.12	CROCC	-0.272897	0.00647066
ENSG00000005469.7	CROT	-0.497625	2.2634e-05
ENSG00000170275.10	CRTAP	-0.241913	0.0383213
ENSG00000105662.11	CRTC1	-0.266191	0.0187683
ENSG00000160741.12	CRTC2	0.524865	3.16964e-06
ENSG00000121671.7	CRY2	-0.879696	4.1246e-21
ENSG00000080200.5	CRYBG3	-0.575521	0.00537747
ENSG00000205758.7	CRYZL1	-0.309942	0.00398032
ENSG00000139631.14	CSAD	0.284138	0.0347343
ENSG00000172346.10	CSDC2	-1.1885	0.028866
ENSG00000009307.11	CSDE1	0.250151	0.000118156
ENSG00000124207.12	CSE1L	0.180951	0.0180891
ENSG00000182578.9	CSF1R	-0.605464	0.0366903
ENSG00000113712.12	CSNK1A1	0.201033	0.00545382
ENSG00000169118.11	CSNK1G1	0.299054	0.00434441
ENSG00000101266.12	CSNK2A1	0.162031	0.0215992
ENSG00000149474.9	CSRP2BP	-0.326615	0.00103474
ENSG00000077984.4	CST7	-1.12349	0.0364211
ENSG00000101138.7	CSTF1	0.380775	3.07398e-05
ENSG00000263264.1	CTB-133G6.1	0.162817	0.0419454
ENSG00000245317.2	CTC-241N9.1	-0.990459	0.0356976
ENSG00000102974.10	CTCF	0.367438	1.76214e-08
ENSG00000267260.1	CTD-2162K18.4	1.68151	0.0288411
ENSG00000268861.1	CTD-2207O23.3	-1.78196	0.00851069
ENSG00000188242.4	CTD-2228K2.5	-0.309966	0.02757
ENSG00000266208.1	CTD-2267D19.3	-1.27306	0.0365829
ENSG00000269545.1	CTD-3138B18.4	1.18344	0.00730011
ENSG00000060069.12	CTDP1	0.284301	0.00173215
ENSG00000144579.3	CTDSP1	-0.21411	0.0159032
ENSG00000119326.10	CTNNAL1	0.193573	0.044094
ENSG00000168036.12	CTNNB1	0.242107	0.00205634
ENSG00000132792.14	CTNNBL1	0.347379	4.71475e-05
ENSG00000171793.9	CTPS1	0.15767	0.0206728
ENSG00000064601.12	CTSA	-0.347747	0.00612813
ENSG00000164733.16	CTSB	0.596166	6.69503e-14
ENSG00000117984.8	CTSD	-0.34878	0.0454883
ENSG00000103811.11	CTSH	0.890449	2.06304e-13
ENSG00000172543.3	CTSW	-1.36407	4.33098e-06
ENSG00000143079.10	CTTNBP2NL	-0.71462	0.0127976
ENSG00000142544.6	CTU1	0.661181	8.55984e-08
ENSG00000174177.8	CTU2	-0.401655	0.000209429
ENSG00000036257.8	CUL3	0.208791	0.00573886
ENSG00000158290.12	CUL4B	0.187833	0.0271417
ENSG00000044090.4	CUL7	-0.459122	1.33552e-05
ENSG00000112659.9	CUL9	-0.410249	7.61632e-05
ENSG00000257923.5	CUX1	0.150342	0.025869
ENSG00000163510.9	CWC22	0.44393	1.42671e-07
ENSG00000153015.11	CWC27	0.330766	0.00475117
ENSG00000172215.5	CXCR6	-1.24126	1.92232e-12
ENSG00000197620.6	CXorf40A	-0.30621	0.0171737
ENSG00000147231.9	CXorf57	0.215041	0.0401816
ENSG00000154832.10	CXXC1	0.317459	1.72497e-05
ENSG00000162144.5	CYB561A3	0.215751	0.0139626
ENSG00000174151.10	CYB561D1	-0.394952	0.000591369
ENSG00000103018.12	CYB5B	0.314113	2.90953e-06
ENSG00000182224.7	CYB5D1	0.690077	5.19032e-12
ENSG00000159348.8	CYB5R1	-0.946356	1.61569e-15
ENSG00000055163.14	CYFIP2	0.276304	0.00047973
ENSG00000187954.8	CYHR1	-0.482943	2.15121e-08
ENSG00000083799.13	CYLD	-0.416699	0.000203796
ENSG00000111012.5	CYP27B1	-0.424589	0.000605197
ENSG00000130649.5	CYP2E1	-0.450085	0.000270917
ENSG00000186104.6	CYP2R1	-1.05521	1.36842e-11
ENSG00000146233.3	CYP39A1	0.304056	0.00551889
ENSG00000180902.12	D2HGDH	-0.261857	0.00398368
ENSG00000100592.11	DAAM1	0.401387	5.08535e-08
ENSG00000173402.7	DAG1	-0.311573	0.000622894
ENSG00000178149.12	DALRD3	0.250015	0.0434337
ENSG00000112977.11	DAP	0.205094	0.0135487
ENSG00000167657.7	DAPK3	-0.471247	4.10045e-08
ENSG00000070190.8	DAPP1	0.299034	1.10607e-05
ENSG00000115866.6	DARS	0.170787	0.0358171
ENSG00000117593.8	DARS2	0.226977	0.0039671
ENSG00000204209.6	DAXX	0.289791	0.00111525
ENSG00000183283.11	DAZAP2	0.287192	0.000276698
ENSG00000006634.3	DBF4	0.279225	0.00130106
ENSG00000155368.12	DBI	0.223816	0.0141251
ENSG00000105516.6	DBP	-0.719171	4.05282e-06
ENSG00000132017.6	DCAF15	0.226582	0.0364211
ENSG00000115827.9	DCAF17	0.202554	0.0166959
ENSG00000119599.12	DCAF4	-0.74814	2.24524e-14
ENSG00000139990.13	DCAF5	-0.284794	0.000506924
ENSG00000143164.11	DCAF6	0.178023	0.0314963
ENSG00000172992.7	DCAKD	0.25965	0.00472364
ENSG00000152457.13	DCLRE1C	0.176571	0.0308762
ENSG00000151065.9	DCP1B	-0.483073	5.21085e-05
ENSG00000150401.10	DCUN1D2	-0.207728	0.0412152
ENSG00000188215.5	DCUN1D3	-0.356657	0.0136481
ENSG00000213722.4	DDAH2	0.385475	0.00488885
ENSG00000100523.10	DDHD1	0.229297	0.00389896
ENSG00000197312.7	DDI2	-0.289094	2.01489e-05
ENSG00000175197.6	DDIT3	0.404069	0.00181556
ENSG00000168209.4	DDIT4	0.937067	2.58085e-11
ENSG00000204580.7	DDR1	-0.325326	0.00571594
ENSG00000198171.8	DDRGK1	-0.26151	0.0139626
ENSG00000099974.7	DDTL	-0.957965	1.50591e-05
ENSG00000100201.14	DDX17	0.282212	2.80764e-06
ENSG00000088205.8	DDX18	0.169116	0.0276367
ENSG00000168872.11	DDX19A	-0.202686	0.00848828
ENSG00000165732.8	DDX21	0.220886	0.00584187
ENSG00000182810.5	DDX28	-0.367798	0.00103418
ENSG00000125485.13	DDX31	-0.419206	3.18514e-07
ENSG00000198563.9	DDX39B	0.346863	3.20537e-06
ENSG00000215301.5	DDX3X	0.217242	0.00199937
ENSG00000145833.11	DDX46	0.245015	0.0107504
ENSG00000213782.3	DDX47	0.502414	0.00159537
ENSG00000108654.7	DDX5	0.325364	2.66447e-08
ENSG00000185163.5	DDX51	-0.389102	3.1211e-08
ENSG00000111364.11	DDX55	-0.399636	2.72239e-08
ENSG00000136271.6	DDX56	-0.226186	0.0133788
ENSG00000118197.9	DDX59	-0.271692	0.00818065
ENSG00000177030.12	DEAF1	-0.266344	0.0122766
ENSG00000160570.9	DEDD2	-0.519103	1.52017e-06
ENSG00000124795.10	DEK	0.258558	0.00287911
ENSG00000213047.7	DENND1B	0.328802	4.14161e-06
ENSG00000162777.12	DENND2D	0.239856	0.00479527
ENSG00000170456.10	DENND5B	0.205197	0.0044828
ENSG00000205593.7	DENND6B	0.220935	0.0170818
ENSG00000024526.12	DEPDC1	0.361722	0.000111134
ENSG00000035499.8	DEPDC1B	0.271002	0.00613366
ENSG00000155792.5	DEPTOR	0.27064	3.49265e-05
ENSG00000023697.8	DERA	0.177879	0.0442928
ENSG00000121644.14	DESI2	0.174413	0.0304855
ENSG00000169598.11	DFFB	0.90606	3.99246e-22
ENSG00000105928.9	DFNA5	0.296607	0.00047973
ENSG00000100056.7	DGCR14	-0.527459	2.08973e-07
ENSG00000128185.5	DGCR6L	-0.368222	0.00774417
ENSG00000065357.15	DGKA	-0.287976	0.00199823
ENSG00000077044.5	DGKD	0.264894	0.000924212
ENSG00000153933.5	DGKE	-0.264109	0.00340174
ENSG00000102780.12	DGKH	0.256195	0.00305187
ENSG00000116133.7	DHCR24	0.471491	1.99913e-07
ENSG00000172893.11	DHCR7	0.526672	1.15278e-10
ENSG00000228716.2	DHFR	0.176163	0.0406407
ENSG00000102967.7	DHODH	-0.427014	4.36516e-06
ENSG00000167536.9	DHRS13	-0.405044	0.0138897
ENSG00000100867.10	DHRS2	1.18655	0.00275483
ENSG00000181192.7	DHTKD1	0.14902	0.0376211
ENSG00000109606.8	DHX15	0.328102	6.85263e-07
ENSG00000067248.5	DHX29	-0.201077	0.0268703
ENSG00000005100.8	DHX33	-0.307969	0.00018275
ENSG00000134815.14	DHX34	-0.568253	2.61449e-10
ENSG00000101452.10	DHX35	0.865744	1.90614e-27
ENSG00000150990.3	DHX37	-0.217646	0.0159348
ENSG00000135829.12	DHX9	0.261245	3.15704e-05
ENSG00000184047.11	DIABLO	-0.595178	1.11729e-05
ENSG00000131504.11	DIAPH1	0.251413	0.000345691
ENSG00000117597.13	DIEXF	-0.748411	1.70293e-20
ENSG00000138463.8	DIRC2	-1.45967	0.000754594
ENSG00000144535.15	DIS3L2	0.190008	0.0394794
ENSG00000140323.4	DISP2	-1.25196	1.92043e-06
ENSG00000130826.11	DKC1	0.196974	0.0104984
ENSG00000105520.6	DKFZP761J1410	-0.636416	0.00013563
ENSG00000008226.15	DLEC1	-1.16005	0.000418155
ENSG00000150672.12	DLG2	0.310271	0.00295011
ENSG00000170579.10	DLGAP1	0.587773	0.0129673
ENSG00000080845.13	DLGAP4	-0.382508	0.000526473
ENSG00000126787.8	DLGAP5	0.276949	0.00263927
ENSG00000171462.10	DLK2	-0.316249	0.0285111
ENSG00000090932.6	DLL3	-0.533846	0.00276904
ENSG00000198947.10	DMD	0.67106	1.53471e-05
ENSG00000135164.14	DMTF1	0.368448	1.24274e-08
ENSG00000165506.10	DNAAF2	-0.323974	0.000993256
ENSG00000185842.10	DNAH14	0.327298	0.0374251
ENSG00000158486.9	DNAH3	-0.464682	0.00780325
ENSG00000086061.11	DNAJA1	0.4261	4.15431e-08
ENSG00000148719.10	DNAJB12	0.37715	7.98564e-06
ENSG00000187726.4	DNAJB13	0.913832	0.0124729
ENSG00000164031.12	DNAJB14	-0.233234	0.0309081
ENSG00000135924.11	DNAJB2	-0.600751	9.35658e-11
ENSG00000137094.10	DNAJB5	-1.0787	4.42561e-08
ENSG00000105993.10	DNAJB6	0.318428	5.06799e-06
ENSG00000077232.12	DNAJC10	0.317727	4.99752e-05
ENSG00000007923.11	DNAJC11	0.258657	0.00134551
ENSG00000138246.11	DNAJC13	0.386344	4.83556e-09
ENSG00000135392.11	DNAJC14	-0.433247	0.000412883
ENSG00000116138.8	DNAJC16	-0.19325	0.048878
ENSG00000104129.5	DNAJC17	0.432149	0.000753499
ENSG00000115137.7	DNAJC27	-0.405087	0.00328748
ENSG00000176410.7	DNAJC30	-0.595034	2.60559e-08
ENSG00000101152.6	DNAJC5	-0.314374	0.000631395
ENSG00000116675.11	DNAJC6	0.195592	0.0133848
ENSG00000168259.10	DNAJC7	0.18881	0.0251193
ENSG00000213918.6	DNASE1	0.180142	0.0335609
ENSG00000013563.9	DNASE1L1	-0.284442	0.0444822
ENSG00000087470.13	DNM1L	0.16339	0.0442198
ENSG00000130816.10	DNMT1	0.220437	0.00103553
ENSG00000142182.4	DNMT3L	0.468211	0.00706462
ENSG00000123992.14	DNPEP	-0.351841	0.00088345
ENSG00000147251.11	DOCK11	0.252358	0.00470696
ENSG00000134516.11	DOCK2	0.178947	0.019293
ENSG00000088538.12	DOCK3	1.21781	1.37807e-25
ENSG00000107099.11	DOCK8	0.289464	1.977e-05
ENSG00000088387.13	DOCK9	0.173671	0.0324831
ENSG00000115325.9	DOK1	-0.916522	5.27302e-15
ENSG00000146094.9	DOK3	0.303435	0.000226658
ENSG00000175920.11	DOK7	-0.504083	0.0137171
ENSG00000175283.7	DOLK	-0.621995	1.3782e-05
ENSG00000167130.13	DOLPP1	-0.654571	5.18443e-12
ENSG00000083097.10	DOPEY1	-0.331159	0.000182992
ENSG00000172269.12	DPAGT1	0.292987	0.00230199
ENSG00000011332.15	DPF1	-0.626739	3.83992e-07
ENSG00000205683.7	DPF3	-0.803967	0.00532481
ENSG00000108963.13	DPH1	-0.794134	5.31946e-09
ENSG00000132768.9	DPH2	-0.395976	8.08711e-06
ENSG00000154813.5	DPH3	0.295288	0.00827303
ENSG00000117543.15	DPH5	-0.478699	0.000620033
ENSG00000074603.14	DPP8	0.448702	5.63561e-11
ENSG00000156162.12	DPY19L4	-0.290767	0.00735811
ENSG00000092964.12	DPYSL2	0.16413	0.040803
ENSG00000117505.8	DR1	0.213974	0.00812767
ENSG00000156171.10	DRAM2	0.422667	5.08586e-08
ENSG00000108591.5	DRG2	-0.331439	0.00101004
ENSG00000151914.13	DST	0.305666	0.000203613
ENSG00000125868.11	DSTN	0.20922	0.0243062
ENSG00000133059.12	DSTYK	-0.994745	1.92525e-15
ENSG00000143476.13	DTL	0.277791	0.000175076
ENSG00000104047.10	DTWD1	-0.337754	0.00564384
ENSG00000137857.13	DUOX1	-0.438498	0.00794964
ENSG00000141994.11	DUS3L	0.328402	5.50745e-05
ENSG00000105865.6	DUS4L	-0.296461	0.00731896
ENSG00000143507.13	DUSP10	-0.539319	0.0148358
ENSG00000144048.6	DUSP11	-0.254459	0.0103625
ENSG00000081721.7	DUSP12	0.477313	1.40673e-08
ENSG00000167065.9	DUSP18	-0.573624	0.00215078
ENSG00000158050.4	DUSP2	0.266538	0.0405199
ENSG00000112679.10	DUSP22	0.222519	0.00577802
ENSG00000108861.4	DUSP3	-0.894928	0.000844002
ENSG00000164086.8	DUSP7	-0.919663	2.66897e-14
ENSG00000128951.9	DUT	0.227602	0.00330147
ENSG00000107404.13	DVL1	-0.299793	0.00108275
ENSG00000161202.13	DVL3	-0.14981	0.0467167
ENSG00000141627.9	DYM	0.220894	0.00406902
ENSG00000197102.6	DYNC1H1	0.169663	0.0366704
ENSG00000135720.8	DYNC1LI2	0.171976	0.0284068
ENSG00000146425.6	DYNLT1	-0.308442	0.00329328
ENSG00000157540.15	DYRK1A	0.400018	2.28373e-11
ENSG00000089091.12	DZANK1	-0.342377	0.0228288
ENSG00000101412.9	E2F1	0.225917	0.00546521
ENSG00000007968.6	E2F2	0.217899	0.0101945
ENSG00000112242.10	E2F3	0.389804	2.38253e-08
ENSG00000133740.6	E2F5	0.334752	4.38045e-05
ENSG00000169016.12	E2F6	-0.561031	2.25523e-07
ENSG00000165891.11	E2F7	0.202732	0.0266848
ENSG00000129173.8	E2F8	0.418597	3.64437e-10
ENSG00000167967.11	E4F1	-0.422219	6.54382e-06
ENSG00000145088.4	EAF2	0.315936	0.000469996
ENSG00000147654.10	EBAG9	-0.205342	0.0400994
ENSG00000164330.12	EBF1	0.265953	0.000236359
ENSG00000147155.6	EBP	0.261703	0.00037486
ENSG00000145194.13	ECE2	-0.285622	0.0112521
ENSG00000130159.9	ECSIT	0.186599	0.0446839
ENSG00000114346.9	ECT2	0.228721	0.00441912
ENSG00000203734.7	ECT2L	-0.483113	0.0336198
ENSG00000134109.6	EDEM1	0.298773	2.79812e-05
ENSG00000088298.8	EDEM2	-0.381313	8.61214e-05
ENSG00000074266.13	EED	0.211135	0.0194378
ENSG00000156508.13	EEF1A1	0.218737	0.00162264
ENSG00000114942.9	EEF1B2	0.270453	0.00158858
ENSG00000167658.11	EEF2	0.161725	0.0272517
ENSG00000103319.7	EEF2K	-0.20521	0.0273362
ENSG00000185055.6	EFCAB10	-0.631391	0.0300395
ENSG00000140025.11	EFCAB11	-0.534094	9.37621e-05
ENSG00000130038.5	EFCAB4B	-0.168786	0.0389534
ENSG00000203965.8	EFCAB7	0.284845	0.0336884
ENSG00000143590.9	EFNA3	-1.67257	1.08352e-05
ENSG00000243364.3	EFNA4	-1.06147	4.55942e-09
ENSG00000090776.5	EFNB1	-1.35354	9.99917e-08
ENSG00000108883.8	EFTUD2	0.190214	0.0314392
ENSG00000172889.11	EGFL7	-1.1575	0.0402136
ENSG00000241404.2	EGFL8	-1.39877	0.000956142
ENSG00000269858.1	EGLN2	0.290846	0.000573351
ENSG00000120738.7	EGR1	0.595724	0.0393357
ENSG00000122877.9	EGR2	1.11803	1.14051e-07
ENSG00000179388.8	EGR3	0.985508	0.0357236
ENSG00000013016.10	EHD3	0.963436	1.29074e-06
ENSG00000204371.7	EHMT2	-0.193507	0.0218037
ENSG00000176396.9	EID2	-0.676753	2.19881e-06
ENSG00000176401.5	EID2B	-0.755928	0.0126139
ENSG00000173812.6	EIF1	0.248471	9.02942e-05
ENSG00000114784.3	EIF1B	0.179057	0.0254281
ENSG00000144895.7	EIF2A	0.288248	5.40309e-05
ENSG00000111361.8	EIF2B1	-0.165987	0.0323025
ENSG00000115211.11	EIF2B4	-0.256647	0.00736394
ENSG00000134001.8	EIF2S1	0.194624	0.0220201
ENSG00000125977.6	EIF2S2	0.31174	2.01109e-05
ENSG00000130741.6	EIF2S3	0.225646	0.00140928
ENSG00000180574.3	EIF2S3L	0.348898	0.0169472
ENSG00000107581.8	EIF3A	0.197674	0.0158504
ENSG00000100353.13	EIF3D	0.2505	0.000624207
ENSG00000104408.5	EIF3E	0.244935	0.00851204
ENSG00000175390.8	EIF3F	0.186111	0.0218819
ENSG00000147677.6	EIF3H	0.195558	0.0034845
ENSG00000100129.13	EIF3L	0.204777	0.0130227
ENSG00000156976.10	EIF4A2	0.334568	1.04393e-06
ENSG00000063046.13	EIF4B	0.167106	0.0465173
ENSG00000151247.8	EIF4E	0.258993	0.00123448
ENSG00000114867.15	EIF4G1	0.163573	0.0183953
ENSG00000110321.11	EIF4G2	0.320468	1.79899e-07
ENSG00000106682.10	EIF4H	0.160463	0.0153062
ENSG00000100664.6	EIF5	0.387544	1.3435e-08
ENSG00000120690.9	ELF1	0.164726	0.00987717
ENSG00000109381.15	ELF2	-0.217258	0.0069308
ENSG00000158711.9	ELK4	0.244437	0.000205788
ENSG00000105656.8	ELL	-0.276415	0.00320462
ENSG00000062598.13	ELMO2	-0.646882	1.16706e-10
ENSG00000102890.10	ELMO3	-0.660187	2.08699e-06
ENSG00000156030.8	ELMSAN1	0.195306	0.00714198
ENSG00000012660.9	ELOVL5	0.357246	2.62365e-08
ENSG00000170522.5	ELOVL6	0.255757	0.00762821
ENSG00000170571.7	EMB	0.269144	0.00440724
ENSG00000104412.3	EMC2	-0.303353	0.0151348
ENSG00000197774.8	EME2	-0.25479	0.0118766
ENSG00000126749.10	EMG1	0.569402	3.68083e-15
ENSG00000186998.11	EMID1	-1.68564	0.0498311
ENSG00000138080.9	EMILIN1	-0.776864	0.00137329
ENSG00000125746.10	EML2	-0.555774	5.27418e-11
ENSG00000214595.7	EML6	0.250358	0.000102412
ENSG00000132464.7	ENAM	0.264538	0.00091739
ENSG00000171617.9	ENC1	0.681052	7.94602e-14
ENSG00000149218.4	ENDOD1	0.248391	0.00461371
ENSG00000173818.12	ENDOV	-0.42727	0.00223357
ENSG00000106991.9	ENG	-0.40999	0.0108688
ENSG00000167280.12	ENGASE	-0.961267	1.99241e-14
ENSG00000124074.7	ENKD1	-0.927036	1.5783e-05
ENSG00000074800.9	ENO1	0.190156	0.0117193
ENSG00000112796.5	ENPP5	-0.76909	0.00327231
ENSG00000143420.13	ENSA	0.195329	0.0045784
ENSG00000138185.12	ENTPD1	-0.433098	0.00142903
ENSG00000187097.8	ENTPD5	-0.642566	2.11494e-09
ENSG00000197586.8	ENTPD6	-0.251761	0.00293981
ENSG00000198018.6	ENTPD7	-0.325022	0.000506924
ENSG00000100393.9	EP300	0.192731	0.00516404
ENSG00000183495.9	EP400	-0.168125	0.0254205
ENSG00000185684.8	EP400NL	-0.214776	0.0200693
ENSG00000120616.11	EPC1	0.409913	4.9536e-08
ENSG00000135999.7	EPC2	0.156542	0.0441079
ENSG00000152223.8	EPG5	-0.260277	0.000663961
ENSG00000120915.9	EPHX2	-0.307022	0.0307696
ENSG00000072134.11	EPN2	-0.252508	0.0250328
ENSG00000085832.12	EPS15	0.210392	0.00288286
ENSG00000131037.10	EPS8L1	-0.321137	0.0115305
ENSG00000141736.9	ERBB2	-0.411021	0.0103603
ENSG00000112851.10	ERBB2IP	0.222908	0.0033326
ENSG00000082805.15	ERC1	0.189168	0.00583273
ENSG00000104884.10	ERCC2	-0.448908	1.18239e-06
ENSG00000175595.10	ERCC4	-0.411691	0.000552055
ENSG00000225830.6	ERCC6	-0.265952	0.0237714
ENSG00000196678.9	ERI2	-0.319847	0.0194442
ENSG00000104714.9	ERICH1	-0.37985	0.00012546
ENSG00000147475.10	ERLIN2	-0.233213	0.00635162
ENSG00000099219.9	ERMP1	0.17892	0.0249958
ENSG00000178607.11	ERN1	0.23337	0.0053682
ENSG00000086619.9	ERO1LB	0.259959	0.00611778
ENSG00000139055.2	ERP27	0.532192	0.0256683
ENSG00000023318.7	ERP44	0.317793	1.35275e-05
ENSG00000213462.4	ERV3-1	-0.32473	0.0220058
ENSG00000242950.2	ERVW-1	-0.501234	0.0297473
ENSG00000141446.6	ESCO1	-0.317761	0.000967505
ENSG00000171320.10	ESCO2	0.245554	0.00779019
ENSG00000089048.10	ESF1	-0.289015	0.0146725
ENSG00000135476.7	ESPL1	0.616813	1.12939e-15
ENSG00000091831.17	ESR1	0.502294	1.55055e-05
ENSG00000140009.14	ESR2	0.374604	8.9496e-07
ENSG00000173153.9	ESRRA	-0.841945	4.79632e-26
ENSG00000196482.12	ESRRG	1.29057	0.0198063
ENSG00000120705.8	ETF1	0.198443	0.00577802
ENSG00000105379.5	ETFB	-0.402632	0.00147234
ENSG00000134954.10	ETS1	0.180809	0.00622311
ENSG00000117036.7	ETV3	-0.294022	0.00255344
ENSG00000126860.7	EVI2A	0.409716	0.00295638
ENSG00000185862.5	EVI2B	0.325326	0.00634188
ENSG00000142459.4	EVI5L	-0.560394	1.58006e-05
ENSG00000196405.8	EVL	0.139712	0.0413468
ENSG00000182944.13	EWSR1	0.274955	4.47434e-06
ENSG00000187609.11	EXD3	-0.490355	0.0280024
ENSG00000205436.3	EXOC3L4	0.669797	0.0055765
ENSG00000171824.9	EXOSC10	0.441932	2.35263e-10
ENSG00000178896.6	EXOSC4	-0.805	4.1329e-08
ENSG00000077348.4	EXOSC5	-0.300233	0.00542915
ENSG00000120699.8	EXOSC8	0.266352	0.00317636
ENSG00000123737.8	EXOSC9	0.25155	0.00162862
ENSG00000012232.4	EXTL3	-0.53909	9.4017e-08
ENSG00000106462.6	EZH2	0.240593	0.000338218
ENSG00000270149.1	F11R	-1.52616	0.0483901
ENSG00000197932.3	F8A1	-0.51165	0.0030529
ENSG00000149485.12	FADS1	0.336624	1.33023e-07
ENSG00000134824.9	FADS2	0.518075	7.98022e-10
ENSG00000185104.15	FAF1	0.22636	0.00313636
ENSG00000113194.8	FAF2	0.216291	0.00522927
ENSG00000180185.7	FAHD1	-0.698748	3.98354e-06
ENSG00000115042.5	FAHD2A	-0.256126	0.0134724
ENSG00000133193.8	FAM104A	-0.213511	0.0494321
ENSG00000065809.9	FAM107B	0.356294	1.76093e-05
ENSG00000166801.11	FAM111A	0.411437	5.35479e-09
ENSG00000189057.6	FAM111B	0.247522	0.00415938
ENSG00000198420.5	FAM115A	-0.90417	0.0290669
ENSG00000121104.3	FAM117A	0.176529	0.0496175
ENSG00000197798.4	FAM118B	-0.212739	0.0456724
ENSG00000154153.9	FAM134B	-0.753149	0.0290969
ENSG00000141699.6	FAM134C	0.311335	0.000105533
ENSG00000035141.3	FAM136A	-0.241624	0.00276374
ENSG00000138640.10	FAM13A	-0.962146	0.00924006
ENSG00000138286.10	FAM149B1	0.225426	0.00761742
ENSG00000130054.4	FAM155B	-1.07007	0.00745288
ENSG00000051009.6	FAM160A2	-0.617761	1.61846e-10
ENSG00000158863.17	FAM160B2	-0.587031	0.000534781
ENSG00000170264.8	FAM161A	-0.467646	0.00362931
ENSG00000156050.4	FAM161B	-0.728821	1.76821e-05
ENSG00000188163.6	FAM166A	0.729343	0.0147735
ENSG00000154319.10	FAM167A	0.152752	0.0359706
ENSG00000054965.6	FAM168A	0.173403	0.0353653
ENSG00000150756.9	FAM173B	0.386287	0.00036146
ENSG00000165660.7	FAM175B	0.809001	9.1116e-24
ENSG00000119906.7	FAM178A	0.306182	2.95605e-05
ENSG00000111879.14	FAM184A	-0.71003	0.00704635
ENSG00000222011.4	FAM185A	-0.383142	0.0153355
ENSG00000135436.4	FAM186B	-1.06786	4.17897e-08
ENSG00000172366.15	FAM195A	-0.300031	0.0131909
ENSG00000164125.11	FAM198B	0.274738	0.0146185
ENSG00000165669.9	FAM204A	0.406071	1.67537e-05
ENSG00000160256.8	FAM207A	-0.252173	0.0145586
ENSG00000108021.15	FAM208B	0.464659	1.01266e-13
ENSG00000177150.8	FAM210A	0.45882	7.55731e-09
ENSG00000197852.8	FAM212B	-0.405514	0.000133826
ENSG00000122378.9	FAM213A	0.466294	0.0406156
ENSG00000047346.8	FAM214A	0.516658	7.24347e-14
ENSG00000005238.15	FAM214B	-1.6424	9.97546e-11
ENSG00000164970.10	FAM219A	-0.562413	8.45481e-09
ENSG00000178761.10	FAM219B	-0.460923	7.26016e-06
ENSG00000178397.8	FAM220A	-0.25064	0.0170726
ENSG00000173065.9	FAM222B	-0.501578	2.68776e-06
ENSG00000225828.1	FAM229A	-0.779123	0.00590733
ENSG00000182368.4	FAM27A	-0.998113	0.00219022
ENSG00000232833.4	FAM27E3	-1.21851	5.70245e-05
ENSG00000105058.7	FAM32A	0.289438	0.00060693
ENSG00000071889.12	FAM3A	-0.369077	0.00163314
ENSG00000119979.11	FAM45A	0.250628	0.00127719
ENSG00000183508.4	FAM46C	0.37301	3.45338e-06
ENSG00000189319.9	FAM53B	0.220898	0.00658524
ENSG00000120709.6	FAM53C	0.442923	4.77573e-10
ENSG00000147382.14	FAM58A	-0.350066	0.00770779
ENSG00000128923.6	FAM63B	-0.26487	0.00968722
ENSG00000154511.7	FAM69A	0.228749	0.0193126
ENSG00000180219.1	FAM71C	0.880851	8.13455e-11
ENSG00000180488.10	FAM73A	-0.274738	0.0308464
ENSG00000148343.14	FAM73B	-0.566764	3.75621e-10
ENSG00000126882.8	FAM78A	-0.260229	0.00471124
ENSG00000157470.7	FAM81A	0.200821	0.00347137
ENSG00000101447.9	FAM83D	0.226077	0.00700401
ENSG00000188522.10	FAM83G	-0.593113	5.28312e-07
ENSG00000168672.3	FAM84B	-0.41456	0.0388559
ENSG00000118894.10	FAM86A	-0.285923	0.0294043
ENSG00000158483.11	FAM86C1	-0.298245	0.00767691
ENSG00000182118.5	FAM89A	-0.632881	0.000123855
ENSG00000130244.8	FAM98C	-0.452187	2.48699e-05
ENSG00000112039.3	FANCE	-0.365128	0.000155622
ENSG00000221829.5	FANCG	0.240782	0.00617709
ENSG00000140525.13	FANCI	0.233143	0.000912193
ENSG00000006607.9	FARP2	0.22681	0.00138695
ENSG00000145982.7	FARS2	0.301448	0.00353024
ENSG00000179115.6	FARSA	-0.247819	0.000836444
ENSG00000169710.6	FASN	0.325042	0.00426902
ENSG00000138399.13	FASTKD1	-0.432461	0.000145296
ENSG00000124279.7	FASTKD3	-0.417154	0.000111134
ENSG00000086570.8	FAT2	-0.638362	0.0288411
ENSG00000170271.6	FAXDC2	-0.262027	0.0196184
ENSG00000188878.12	FBF1	-0.420106	0.0300395
ENSG00000144152.8	FBLN7	1.50343	0.0373415
ENSG00000156860.11	FBRS	-0.261619	0.000535761
ENSG00000107872.8	FBXL15	-0.33963	0.0159459
ENSG00000127585.7	FBXL16	-0.483103	0.000540988
ENSG00000155034.14	FBXL18	0.639926	2.96132e-10
ENSG00000182325.6	FBXL6	-0.432635	8.04725e-05
ENSG00000135722.4	FBXL8	-1.53467	1.55589e-06
ENSG00000138081.15	FBXO11	0.217374	0.00625465
ENSG00000135108.10	FBXO21	-0.217809	0.00565318
ENSG00000167196.9	FBXO22	-0.208767	0.0365829
ENSG00000110429.9	FBXO3	-0.410823	4.47229e-07
ENSG00000103264.11	FBXO31	-0.68679	8.03681e-10
ENSG00000174013.7	FBXO45	0.627934	7.76416e-18
ENSG00000177051.5	FBXO46	-0.206964	0.0230305
ENSG00000204923.3	FBXO48	-0.937989	5.35479e-09
ENSG00000112029.5	FBXO5	0.328655	1.12874e-06
ENSG00000116663.6	FBXO6	-1.1346	0.00198845
ENSG00000072803.13	FBXW11	0.230252	0.00242854
ENSG00000109670.9	FBXW7	0.171821	0.0294043
ENSG00000132004.8	FBXW9	0.354813	0.0037656
ENSG00000157107.9	FCHO2	-0.499152	0.00126169
ENSG00000197948.6	FCHSD1	-0.474645	3.58593e-08
ENSG00000137478.10	FCHSD2	0.232524	0.0016278
ENSG00000163534.10	FCRL1	0.199986	0.00941965
ENSG00000143297.14	FCRL5	1.10406	3.15618e-11
ENSG00000132185.12	FCRLA	0.297937	0.000182396
ENSG00000079459.8	FDFT1	0.394221	1.90042e-07
ENSG00000160752.10	FDPS	1.07879	2.47282e-53
ENSG00000169018.5	FEM1B	-0.215806	0.00406186
ENSG00000168496.3	FEN1	0.174676	0.0171824
ENSG00000127084.13	FGD3	-0.394372	1.451e-05
ENSG00000139132.10	FGD4	0.491489	3.17886e-07
ENSG00000180263.9	FGD6	0.473951	6.02881e-10
ENSG00000161958.6	FGF11	-1.24192	0.0478014
ENSG00000174721.9	FGFBP3	-0.75515	0.0127905
ENSG00000213066.7	FGFR1OP	0.574604	2.73391e-12
ENSG00000127418.10	FGFRL1	-0.437796	0.0277872
ENSG00000000938.8	FGR	0.445966	4.27448e-05
ENSG00000189283.5	FHIT	0.229672	0.0483721
ENSG00000112214.6	FHL5	0.973902	0.00049095
ENSG00000118407.10	FILIP1	-1.17462	0.00147234
ENSG00000168386.14	FILIP1L	-0.629499	6.29199e-09
ENSG00000214253.4	FIS1	0.180169	0.0223861
ENSG00000197296.5	FITM2	-0.89523	5.40967e-06
ENSG00000179943.6	FIZ1	-0.245311	0.014898
ENSG00000119321.4	FKBP15	0.258166	0.000303299
ENSG00000088832.10	FKBP1A	0.17885	0.0157917
ENSG00000204315.3	FKBPL	-0.612454	0.000192871
ENSG00000160688.14	FLAD1	-0.525948	4.46471e-11
ENSG00000154803.8	FLCN	-0.439894	0.0279558
ENSG00000269781.1	FLJ20306	-0.428098	0.0354612
ENSG00000126500.3	FLRT1	-1.07258	0.0102007
ENSG00000090554.8	FLT3LG	-1.48594	0.000569273
ENSG00000059122.12	FLYWCH1	-0.444771	4.69089e-08
ENSG00000162076.8	FLYWCH2	-0.354178	0.00254914
ENSG00000010932.11	FMO1	0.70856	4.32098e-07
ENSG00000094963.9	FMO2	0.649311	4.09725e-10
ENSG00000007933.8	FMO3	0.288753	0.00798145
ENSG00000076258.5	FMO4	0.465786	0.0124587
ENSG00000117507.4	FMO6P	0.288191	0.00924562
ENSG00000115414.14	FN1	-0.465866	0.00124813
ENSG00000167363.9	FN3K	-0.778706	0.0174104
ENSG00000141560.10	FN3KRP	-0.353034	0.000575106
ENSG00000187239.12	FNBP1	0.167215	0.023512
ENSG00000102531.12	FNDC3A	0.261822	0.000219243
ENSG00000172568.4	FNDC9	0.408331	0.00015011
ENSG00000170345.5	FOS	0.938871	0.00426256
ENSG00000125740.9	FOSB	-0.52814	0.0260581
ENSG00000175592.4	FOSL1	-0.823484	0.00199907
ENSG00000170122.4	FOXD4	-0.803076	0.0142969
ENSG00000186790.4	FOXE3	-1.19189	0.0327186
ENSG00000160973.7	FOXH1	-2.11673	0.00235165
ENSG00000164916.9	FOXK1	-0.35194	9.05599e-06
ENSG00000170802.11	FOXN2	0.335803	1.08031e-05
ENSG00000053254.11	FOXN3	0.239358	0.000345691
ENSG00000150907.6	FOXO1	0.276665	0.000228831
ENSG00000118689.10	FOXO3	-0.424389	0.000313151
ENSG00000114861.14	FOXP1	0.227614	0.00261234
ENSG00000049768.10	FOXP3	-2.10274	2.88765e-05
ENSG00000110074.6	FOXRED1	-0.352294	2.12684e-05
ENSG00000100350.10	FOXRED2	-0.228189	0.0427836
ENSG00000148690.10	FRA10AC1	-0.264764	0.03731
ENSG00000165879.7	FRAT1	-0.921009	4.12463e-10
ENSG00000181274.5	FRAT2	-0.814967	1.6068e-16
ENSG00000114541.10	FRMD4B	1.57812	0.0243819
ENSG00000126391.9	FRMD8	-0.258765	0.0205424
ENSG00000137218.6	FRS3	-0.93014	4.39273e-06
ENSG00000070404.5	FSTL3	-0.696849	9.05092e-05
ENSG00000087086.9	FTL	0.170493	0.0306351
ENSG00000162613.12	FUBP1	0.187972	0.0227207
ENSG00000148803.7	FUOM	-0.483771	0.00207205
ENSG00000174951.6	FUT1	-1.81312	5.25444e-10
ENSG00000196968.6	FUT11	-0.211265	0.033066
ENSG00000176920.10	FUT2	-1.65931	1.10208e-08
ENSG00000196371.2	FUT4	-2.2258	0.00907832
ENSG00000156413.9	FUT6	-1.66809	0.00483706
ENSG00000033170.12	FUT8	0.2397	0.00026906
ENSG00000114416.13	FXR1	0.347775	3.20464e-06
ENSG00000129245.7	FXR2	-0.397393	0.000120984
ENSG00000163820.10	FYCO1	-0.932099	1.52467e-29
ENSG00000010810.13	FYN	0.184818	0.030889
ENSG00000180340.5	FZD2	-1.17324	0.016581
ENSG00000163251.3	FZD5	-0.530687	0.000415641
ENSG00000092140.10	G2E3	0.208618	0.0399307
ENSG00000145907.10	G3BP1	0.163884	0.0153868
ENSG00000131482.5	G6PC	0.497592	0.0344838
ENSG00000141349.4	G6PC3	-0.20584	0.0372816
ENSG00000109458.4	GAB1	0.348407	3.95007e-07
ENSG00000154727.6	GABPA	0.354	3.61962e-05
ENSG00000104064.12	GABPB1	0.314738	0.000282286
ENSG00000179271.1	GADD45GIP1	0.199073	0.0378357
ENSG00000178950.12	GAK	-0.161566	0.0428844
ENSG00000054983.12	GALC	-0.318472	0.0244876
ENSG00000141012.8	GALNS	-0.437075	5.81245e-05
ENSG00000141429.9	GALNT1	0.216032	0.0157274
ENSG00000213930.7	GALT	-0.6932	3.39528e-06
ENSG00000261609.3	GAN	-0.271517	0.0013102
ENSG00000111640.10	GAPDH	0.196744	0.00684755
ENSG00000165219.17	GAPVD1	0.210617	0.00488266
ENSG00000136895.14	GARNL3	-0.457071	0.000686344
ENSG00000106105.9	GARS	0.220866	0.00157933
ENSG00000183087.10	GAS6	-0.365797	0.000704416
ENSG00000157259.6	GATAD1	-0.232052	0.00697343
ENSG00000171766.11	GATM	-1.33262	0.00828704
ENSG00000177628.11	GBA	0.318628	0.00518167
ENSG00000148288.7	GBGT1	-1.00152	0.000943332
ENSG00000179562.2	GCC1	-0.484271	1.27205e-10
ENSG00000001084.6	GCLC	-0.377846	4.5013e-06
ENSG00000187210.8	GCNT1	0.442249	1.3952e-09
ENSG00000111846.11	GCNT2	0.190109	0.0488883
ENSG00000174500.8	GCSAM	0.321918	2.34119e-06
ENSG00000140905.5	GCSH	-0.390206	0.0485904
ENSG00000057608.12	GDI2	0.138939	0.0405789
ENSG00000153982.6	GDPD1	-0.898107	0.000668021
ENSG00000183208.8	GDPGP1	-0.853709	3.66672e-08
ENSG00000082516.8	GEMIN5	-0.263667	0.000513469
ENSG00000178295.10	GEN1	0.428739	5.86832e-08
ENSG00000239857.2	GET4	-0.491992	0.031863
ENSG00000162676.7	GFI1	-0.420547	0.0373415
ENSG00000141098.8	GFOD2	-0.734531	3.80643e-10
ENSG00000103365.11	GGA2	0.216493	0.00571361
ENSG00000005955.8	GGNBP2	0.35908	2.89181e-07
ENSG00000131067.12	GGT7	-0.466111	0.00136946
ENSG00000167925.11	GHDC	-0.414388	2.3355e-05
ENSG00000106128.14	GHRHR	0.679315	0.000408583
ENSG00000157017.11	GHRL	-0.328143	0.0159457
ENSG00000141034.5	GID4	-0.636981	1.05668e-05
ENSG00000146830.9	GIGYF1	-0.331558	1.19881e-05
ENSG00000145723.12	GIN1	0.62546	2.05786e-09
ENSG00000181938.9	GINS3	0.870359	7.15445e-31
ENSG00000010310.4	GIPR	-0.988055	2.24804e-08
ENSG00000108262.11	GIT1	-0.254821	0.0146605
ENSG00000139436.16	GIT2	0.334092	1.88211e-06
ENSG00000106415.8	GLCCI1	0.423163	2.21682e-11
ENSG00000126603.4	GLIS2	-0.482285	0.0340796
ENSG00000124767.6	GLO1	0.287743	0.000890807
ENSG00000115419.8	GLS	0.312749	0.00235207
ENSG00000135423.8	GLS2	-0.509506	3.15052e-07
ENSG00000224051.2	GLTPD1	-0.734826	4.7079e-12
ENSG00000182327.7	GLTPD2	-1.70951	0.00722152
ENSG00000063169.6	GLTSCR1	-0.370589	0.000214932
ENSG00000112624.8	GLTSCR1L	0.22419	0.00251363
ENSG00000140632.12	GLYR1	0.213769	0.00646527
ENSG00000196743.4	GM2A	0.20162	0.00924006
ENSG00000101216.6	GMEB2	0.35872	0.000332017
ENSG00000197045.8	GMFB	0.258062	0.0159459
ENSG00000112312.5	GMNN	0.201757	0.0163958
ENSG00000100938.13	GMPR2	0.275223	0.000935349
ENSG00000163655.11	GMPS	0.159527	0.0441687
ENSG00000088256.4	GNA11	-0.982653	1.19383e-16
ENSG00000120063.5	GNA13	0.31151	0.000408583
ENSG00000065135.7	GNAI3	0.187446	0.0126827
ENSG00000141404.11	GNAL	-0.76575	0.0384832
ENSG00000087460.19	GNAS	0.184291	0.00862386
ENSG00000078369.13	GNB1	0.220316	0.00899024
ENSG00000185838.9	GNB1L	-0.379931	0.0325547
ENSG00000204628.7	GNB2L1	0.213971	0.00547508
ENSG00000114450.5	GNB4	0.192079	0.00602977
ENSG00000162188.5	GNG3	0.896444	2.41578e-05
ENSG00000130119.11	GNL3L	0.16769	0.0243291
ENSG00000163281.7	GNPDA2	-0.251252	0.0275129
ENSG00000111670.10	GNPTAB	0.199392	0.00520501
ENSG00000090581.5	GNPTG	-0.536004	7.64788e-06
ENSG00000109163.6	GNRHR	-0.634484	0.0289671
ENSG00000135677.6	GNS	-0.383399	0.000410345
ENSG00000136935.9	GOLGA1	-0.328944	0.00175293
ENSG00000167110.12	GOLGA2	-0.902609	1.92365e-24
ENSG00000066455.8	GOLGA5	-0.52551	9.59838e-09
ENSG00000147533.12	GOLGA7	-0.255719	0.0251157
ENSG00000143457.6	GOLPH3L	-0.268638	0.00288417
ENSG00000111711.5	GOLT1B	-0.23741	0.0196658
ENSG00000114745.9	GORASP1	-0.223688	0.034729
ENSG00000115806.8	GORASP2	-0.174305	0.0230505
ENSG00000108433.11	GOSR2	-0.227256	0.0157711
ENSG00000125166.8	GOT2	0.172573	0.0365982
ENSG00000119927.9	GPAM	-0.279704	0.00691065
ENSG00000204438.6	GPANK1	0.395807	3.24438e-07
ENSG00000076650.2	GPATCH1	-0.236843	0.0236708
ENSG00000198746.8	GPATCH3	0.489058	2.28988e-06
ENSG00000062194.11	GPBP1	0.205391	0.00926156
ENSG00000159592.6	GPBP1L1	0.372982	8.03214e-09
ENSG00000213420.3	GPC2	-0.429159	0.000222332
ENSG00000125772.8	GPCPD1	0.513595	7.67742e-13
ENSG00000068394.9	GPKOW	0.230874	0.0384268
ENSG00000046653.10	GPM6B	0.330615	0.00680837
ENSG00000142751.10	GPN2	-0.198654	0.0155303
ENSG00000020181.13	GPR124	-1.03128	0.00179555
ENSG00000111452.8	GPR133	0.313975	0.000324423
ENSG00000173890.12	GPR160	0.185962	0.0256204
ENSG00000174946.5	GPR171	-0.541387	0.0125445
ENSG00000184194.5	GPR173	-0.376424	0.0163152
ENSG00000188888.7	GPR179	0.920678	2.14764e-05
ENSG00000125245.8	GPR18	0.5181	1.48591e-14
ENSG00000152749.7	GPR180	-0.312096	7.61161e-05
ENSG00000172209.4	GPR22	-0.483531	0.000403692
ENSG00000170075.8	GPR37L1	-1.04935	0.00660346
ENSG00000117262.14	GPR89A	-0.39908	0.0014394
ENSG00000188092.10	GPR89B	-0.888248	0.000131149
ENSG00000185477.4	GPRIN3	0.206947	0.0458235
ENSG00000167701.9	GPT	-0.37181	0.00559701
ENSG00000166123.9	GPT2	0.202524	0.016235
ENSG00000211445.7	GPX3	-0.641267	0.0472133
ENSG00000089351.10	GRAMD1A	-0.481244	2.50854e-08
ENSG00000177885.9	GRB2	0.190365	0.00489677
ENSG00000141449.10	GREB1L	-0.626657	3.86745e-05
ENSG00000215045.4	GRID2IP	-1.25085	0.00363732
ENSG00000105737.5	GRIK5	-0.740087	0.0185491
ENSG00000125388.15	GRK4	0.646579	1.39934e-06
ENSG00000109519.8	GRPEL1	-0.326836	0.000172433
ENSG00000139835.9	GRTP1	-0.800586	0.0159536
ENSG00000073605.14	GSDMB	0.313327	0.0195814
ENSG00000111305.14	GSG1	-1.27863	0.0315243
ENSG00000177602.4	GSG2	0.241133	0.0255388
ENSG00000105723.7	GSK3A	0.234477	0.00594614
ENSG00000082701.10	GSK3B	0.229654	0.0019184
ENSG00000100744.10	GSKIP	-0.34812	0.00120504
ENSG00000103342.8	GSPT1	0.313962	0.000672264
ENSG00000100577.14	GSTZ1	0.332257	7.89572e-05
ENSG00000165417.7	GTF2A1	0.312798	9.97466e-05
ENSG00000153767.5	GTF2E1	-0.430887	8.84305e-05
ENSG00000145736.10	GTF2H2	-0.288349	0.0272259
ENSG00000183474.11	GTF2H2C	-0.265907	0.0421142
ENSG00000213780.6	GTF2H4	-2.76614	0.0156547
ENSG00000006704.6	GTF2IRD1	0.931331	0.0355543
ENSG00000115207.9	GTF3C2	0.172075	0.0362606
ENSG00000172432.14	GTPBP2	0.333652	9.08751e-05
ENSG00000075218.14	GTSE1	0.407679	2.89795e-09
ENSG00000105968.14	H2AFV	0.140966	0.0436896
ENSG00000188486.3	H2AFX	0.184921	0.016003
ENSG00000164032.7	H2AFZ	0.269485	0.00178125
ENSG00000163041.5	H3F3A	0.227359	0.00465454
ENSG00000132475.4	H3F3B	0.225005	0.00169365
ENSG00000131373.10	HACL1	-0.237924	0.0478402
ENSG00000084754.6	HADHA	0.215064	0.00366258
ENSG00000063854.8	HAGH	-0.406107	0.00174802
ENSG00000180423.4	HARBI1	-0.576753	0.000372205
ENSG00000137814.5	HAUS2	0.226871	0.00624643
ENSG00000214367.3	HAUS3	-0.225908	0.0309559
ENSG00000213397.6	HAUS7	-0.484081	0.00528487
ENSG00000131351.10	HAUS8	0.256088	0.000369115
ENSG00000105856.9	HBP1	0.910436	7.44197e-33
ENSG00000112339.10	HBS1L	0.250354	0.00166934
ENSG00000172534.9	HCFC1	0.61946	2.78636e-12
ENSG00000206344.6	HCG27	0.765391	1.43483e-14
ENSG00000116478.7	HDAC1	0.169595	0.0296639
ENSG00000100429.13	HDAC10	-0.635714	0.00473356
ENSG00000108840.11	HDAC5	-0.199305	0.0328603
ENSG00000048052.17	HDAC9	0.419849	1.9727e-11
ENSG00000184508.6	HDDC3	-0.455509	0.00234236
ENSG00000130021.9	HDHD1	0.257787	0.00698125
ENSG00000119431.5	HDHD3	-0.667289	5.70749e-06
ENSG00000115677.12	HDLBP	0.285118	7.03138e-05
ENSG00000164818.11	HEATR2	0.377932	2.58847e-05
ENSG00000155393.8	HEATR3	-0.251677	0.00651971
ENSG00000187105.4	HEATR4	-0.603772	0.0182661
ENSG00000008869.7	HEATR5B	-0.257822	0.00181556
ENSG00000068097.10	HEATR6	-0.884419	6.48451e-08
ENSG00000126107.10	HECTD3	-0.301602	0.00332908
ENSG00000138411.6	HECW2	0.793719	8.15489e-07
ENSG00000127311.5	HELB	-0.366182	0.00326293
ENSG00000119969.10	HELLS	0.263141	0.00416924
ENSG00000130589.12	HELZ2	-0.404513	0.000246891
ENSG00000136929.8	HEMGN	0.562985	0.00635098
ENSG00000114735.5	HEMK1	-0.620136	2.29151e-09
ENSG00000188175.5	HEPACAM2	2.06353	0.0483361
ENSG00000138641.11	HERC3	-0.314756	0.000728295
ENSG00000051108.10	HERPUD1	0.25913	0.00562257
ENSG00000114315.3	HES1	-2.00853	0.000238102
ENSG00000213614.5	HEXA	-0.281052	0.0123747
ENSG00000168517.6	HEXIM2	0.480516	0.000193823
ENSG00000156875.9	HIAT1	0.390333	8.02971e-08
ENSG00000148110.11	HIATL1	0.222457	0.00187385
ENSG00000169635.5	HIC2	-0.753749	2.38201e-18
ENSG00000172273.8	HINFP	-0.678655	2.60684e-11
ENSG00000169567.7	HINT1	0.169457	0.0138809
ENSG00000127946.12	HIP1	0.155862	0.0365606
ENSG00000149929.11	HIRIP3	-0.290427	0.00462845
ENSG00000187837.2	HIST1H1C	0.181433	0.0358492
ENSG00000187990.4	HIST1H2BG	0.181333	0.0428844
ENSG00000198366.5	HIST1H3A	0.1917	0.0146774
ENSG00000197238.3	HIST1H4J	0.221412	0.0262607
ENSG00000010818.4	HIVEP2	0.41629	1.06165e-08
ENSG00000127124.9	HIVEP3	0.447506	5.23896e-08
ENSG00000123485.7	HJURP	0.365736	1.93586e-08
ENSG00000234745.5	HLA-B	0.204397	0.00141783
ENSG00000204257.10	HLA-DMA	0.226527	0.0219348
ENSG00000242574.4	HLA-DMB	0.267034	0.00114206
ENSG00000231389.3	HLA-DPA1	0.237552	0.000286136
ENSG00000223865.6	HLA-DPB1	0.217456	0.0365982
ENSG00000196735.7	HLA-DQA1	0.365183	0.00251634
ENSG00000237541.3	HLA-DQA2	0.347707	0.0325547
ENSG00000204287.9	HLA-DRA	0.32642	1.67537e-05
ENSG00000147421.13	HMBOX1	0.208356	0.00472504
ENSG00000183624.9	HMCES	0.211522	0.00141152
ENSG00000164104.7	HMGB2	0.266937	0.00251657
ENSG00000113161.11	HMGCR	0.791967	3.91934e-42
ENSG00000112972.10	HMGCS1	0.53325	2.84175e-19
ENSG00000198830.6	HMGN2	0.198809	0.0235507
ENSG00000100281.9	HMGXB4	0.267731	0.000166687
ENSG00000072571.15	HMMR	0.477251	1.15984e-05
ENSG00000103415.7	HMOX2	-0.487476	2.59714e-08
ENSG00000135100.13	HNF1A	0.851817	1.63947e-05
ENSG00000122566.16	HNRNPA2B1	0.312585	0.00229795
ENSG00000170144.14	HNRNPA3	0.30084	0.00151182
ENSG00000092199.13	HNRNPC	0.159216	0.0260623
ENSG00000138668.14	HNRNPD	0.227359	0.0499958
ENSG00000169813.12	HNRNPF	0.195151	0.00494944
ENSG00000169045.13	HNRNPH1	0.235597	0.0122265
ENSG00000096746.13	HNRNPH3	0.219603	0.046277
ENSG00000165119.14	HNRNPK	0.218213	0.00614658
ENSG00000104824.12	HNRNPL	0.273043	4.26455e-05
ENSG00000125944.14	HNRNPR	0.182386	0.0419454
ENSG00000153187.12	HNRNPU	0.264582	0.0037656
ENSG00000215271.6	HOMEZ	-0.492489	4.28653e-06
ENSG00000095066.7	HOOK2	-0.500151	0.000433199
ENSG00000105991.7	HOXA1	-0.683587	3.16964e-06
ENSG00000120093.7	HOXB3	-1.05934	1.82009e-06
ENSG00000182742.5	HOXB4	-0.721781	9.90183e-07
ENSG00000127483.13	HP1BP3	0.215765	0.00202189
ENSG00000158104.7	HPD	-0.947873	0.0186362
ENSG00000165704.10	HPRT1	0.241105	0.0125451
ENSG00000100099.16	HPS4	0.197441	0.00461918
ENSG00000166189.6	HPS6	-0.67286	1.57603e-11
ENSG00000118960.8	HS1BP3	-0.373795	0.00701061
ENSG00000153936.12	HS2ST1	0.218749	0.0126965
ENSG00000230989.2	HSBP1	0.198435	0.0230802
ENSG00000108786.6	HSD17B1	-0.485482	0.00169576
ENSG00000149084.7	HSD17B12	0.31516	5.40881e-05
ENSG00000025423.7	HSD17B6	0.696399	0.000347015
ENSG00000132196.9	HSD17B7	0.769379	1.48028e-28
ENSG00000080824.14	HSP90AA1	0.164861	0.0232202
ENSG00000096384.15	HSP90AB1	0.254245	0.000146202
ENSG00000166598.8	HSP90B1	-0.226172	0.0156216
ENSG00000132622.6	HSPA12B	-1.11556	1.09366e-05
ENSG00000155304.4	HSPA13	-0.211151	0.0307951
ENSG00000204388.5	HSPA1B	-0.426596	0.000431346
ENSG00000170606.9	HSPA4	0.173361	0.0158871
ENSG00000109971.9	HSPA8	0.305458	0.000400055
ENSG00000169087.6	HSPBAP1	-0.496942	0.00103304
ENSG00000133265.6	HSPBP1	0.275354	0.0133996
ENSG00000166736.7	HTR3A	1.31871	0.0142845
ENSG00000115317.7	HTRA2	0.575622	1.25242e-08
ENSG00000197386.6	HTT	0.23848	0.0036384
ENSG00000188996.4	HUS1B	-1.22942	0.0175158
ENSG00000086758.11	HUWE1	0.190768	0.0145179
ENSG00000122986.9	HVCN1	0.596757	2.10944e-10
ENSG00000068001.9	HYAL2	-0.858919	2.50398e-05
ENSG00000196305.13	IARS	0.217574	0.00426021
ENSG00000067704.8	IARS2	0.204153	0.0156242
ENSG00000108622.6	ICAM2	0.260352	0.037229
ENSG00000105376.4	ICAM5	-0.442948	4.29326e-05
ENSG00000116237.11	ICMT	0.273329	0.000898212
ENSG00000160223.12	ICOSLG	0.185471	0.0224763
ENSG00000125968.7	ID1	0.378553	0.000316109
ENSG00000115738.5	ID2	0.281881	0.00359908
ENSG00000172201.6	ID4	0.339737	0.000649156
ENSG00000166411.9	IDH3A	-0.249573	0.00309713
ENSG00000067064.6	IDI1	0.551276	9.46411e-15
ENSG00000010295.15	IFFO1	-0.690168	2.88936e-15
ENSG00000163565.14	IFI16	0.229834	0.0111726
ENSG00000159128.10	IFNGR2	-0.223158	0.0344838
ENSG00000185436.7	IFNLR1	0.227919	0.00585371
ENSG00000006652.9	IFRD1	0.293705	0.000225762
ENSG00000163913.7	IFT122	0.171432	0.0411745
ENSG00000187535.9	IFT140	-0.662963	6.41146e-08
ENSG00000138002.10	IFT172	-0.489321	0.00627495
ENSG00000109083.9	IFT20	0.267108	0.0345448
ENSG00000100360.10	IFT27	-0.591816	2.59714e-08
ENSG00000096872.11	IFT74	0.331838	0.025114
ENSG00000122970.11	IFT81	0.331911	0.0316898
ENSG00000089289.11	IGBP1	0.190022	0.04227
ENSG00000136231.9	IGF2BP3	0.354865	1.20433e-07
ENSG00000099769.5	IGFALS	-0.65765	0.0181882
ENSG00000132740.4	IGHMBP2	-0.296082	0.00360672
ENSG00000162729.9	IGSF8	-0.257713	0.0139731
ENSG00000104365.9	IKBKB	-0.242219	0.00214043
ENSG00000185811.12	IKZF1	0.397108	1.41187e-10
ENSG00000030419.12	IKZF2	0.429176	6.41039e-07
ENSG00000161405.12	IKZF3	0.224816	0.00047973
ENSG00000095574.7	IKZF5	0.245383	0.00537862
ENSG00000110324.5	IL10RA	-0.24762	0.00751863
ENSG00000137070.13	IL11RA	-0.763898	0.0132564
ENSG00000096996.11	IL12RB1	0.382508	2.77309e-07
ENSG00000177663.9	IL17RA	-0.293417	0.00310323
ENSG00000163702.14	IL17RC	-1.00605	0.000141066
ENSG00000137496.13	IL18BP	-0.28009	0.0401837
ENSG00000115008.5	IL1A	0.503296	0.0364847
ENSG00000103522.11	IL21R	0.408764	3.90751e-10
ENSG00000110944.4	IL23A	-0.526773	0.0203475
ENSG00000077238.9	IL4R	0.249231	8.47672e-05
ENSG00000134352.15	IL6ST	-0.459087	1.20366e-05
ENSG00000168685.10	IL7R	0.474053	2.90953e-06
ENSG00000145103.8	ILDR1	0.469437	0.0253655
ENSG00000129351.13	ILF3	0.221639	0.000643141
ENSG00000105135.11	ILVBL	-0.302686	0.000957818
ENSG00000136718.5	IMP4	0.256677	0.00327739
ENSG00000196388.4	INCA1	-0.713422	4.0476e-05
ENSG00000149503.8	INCENP	0.204976	0.0212866
ENSG00000071243.11	ING3	0.318408	0.000487159
ENSG00000111653.15	ING4	0.310304	0.00870531
ENSG00000168395.10	ING5	0.274296	0.000130779
ENSG00000139269.2	INHBE	0.81147	1.07289e-07
ENSG00000114933.11	INO80D	0.263647	0.000525943
ENSG00000148384.11	INPP5E	-0.2993	0.0149059
ENSG00000132376.15	INPP5K	-0.35933	0.0095936
ENSG00000186480.8	INSIG1	0.740483	9.12437e-20
ENSG00000104613.7	INTS10	-0.193572	0.00939203
ENSG00000138785.10	INTS12	-0.281441	0.0240766
ENSG00000185085.2	INTS5	-0.52225	5.07623e-07
ENSG00000102786.10	INTS6	0.265765	0.000271189
ENSG00000143493.8	INTS7	0.227902	0.0031582
ENSG00000104299.10	INTS9	0.323066	0.000360275
ENSG00000119509.8	INVS	0.326116	2.37227e-05
ENSG00000068745.10	IP6K2	0.314287	6.8183e-06
ENSG00000151151.5	IPMK	-0.26856	0.0179011
ENSG00000086200.12	IPO11	0.22942	0.00502441
ENSG00000117408.6	IPO13	-0.519651	1.72093e-06
ENSG00000065150.14	IPO5	0.192876	0.0144243
ENSG00000198700.5	IPO9	0.203602	0.00272676
ENSG00000160051.7	IQCC	-0.55133	0.00116119
ENSG00000106012.13	IQCE	-0.39096	0.0433095
ENSG00000140575.8	IQGAP1	0.147597	0.0245579
ENSG00000145703.11	IQGAP2	0.27313	0.00170676
ENSG00000183856.6	IQGAP3	-0.256284	0.00826632
ENSG00000125347.9	IRF1	-0.199899	0.0345015
ENSG00000168310.6	IRF2	0.481714	2.7024e-09
ENSG00000170604.3	IRF2BP1	0.288941	0.00663772
ENSG00000168264.6	IRF2BP2	-0.648512	1.328e-08
ENSG00000119669.3	IRF2BPL	-0.90329	5.31047e-19
ENSG00000137265.10	IRF4	0.403032	5.24073e-08
ENSG00000140968.6	IRF8	0.223771	0.000294779
ENSG00000213928.4	IRF9	-0.471068	0.0365829
ENSG00000167378.4	IRGQ	-0.544548	1.78823e-10
ENSG00000135070.9	ISCA1	0.515118	1.10112e-10
ENSG00000165898.9	ISCA2	-0.453648	1.71403e-05
ENSG00000136003.11	ISCU	0.172239	0.036211
ENSG00000159556.5	ISL2	-1.06223	0.00582091
ENSG00000063241.3	ISOC2	-0.280134	0.00576485
ENSG00000078747.8	ITCH	0.304735	3.17898e-05
ENSG00000143127.8	ITGA10	-0.697825	0.0246962
ENSG00000005884.13	ITGA3	-0.587619	2.03518e-05
ENSG00000115232.9	ITGA4	0.384554	5.754e-08
ENSG00000005844.13	ITGAL	0.225242	0.00105215
ENSG00000150093.14	ITGB1	0.194475	0.0430277
ENSG00000132470.9	ITGB4	-1.01577	0.0123635
ENSG00000139626.11	ITGB7	0.23475	0.00844227
ENSG00000143772.5	ITPKB	0.284878	5.02404e-05
ENSG00000086544.2	ITPKC	-0.827037	1.07995e-06
ENSG00000123104.7	ITPR2	0.170389	0.0280024
ENSG00000198885.5	ITPRIPL1	-0.467679	0.00351109
ENSG00000205726.9	ITSN1	-0.259926	0.0281369
ENSG00000163166.9	IWS1	0.243836	0.00716895
ENSG00000101384.7	JAG1	-0.781068	0.0137533
ENSG00000162434.7	JAK1	0.267051	9.43942e-05
ENSG00000166086.8	JAM3	-0.386546	0.0109791
ENSG00000153814.7	JAZF1	0.270425	0.0057773
ENSG00000140044.8	JDP2	0.182622	0.0494321
ENSG00000006459.6	JHDM1D	-0.462574	0.00451251
ENSG00000171988.13	JMJD1C	0.231921	0.00271715
ENSG00000081692.8	JMJD4	-0.667394	1.35616e-07
ENSG00000070495.10	JMJD6	0.366054	0.000192883
ENSG00000243789.6	JMJD7	-0.918202	0.000631395
ENSG00000168970.16	JMJD7-PLA2G4B	-0.877588	4.1473e-07
ENSG00000152409.8	JMY	-0.847988	3.29408e-09
ENSG00000161677.7	JOSD2	0.435172	0.000866019
ENSG00000183340.5	JRKL	-0.731906	2.25193e-08
ENSG00000171223.4	JUNB	-0.79487	8.37947e-11
ENSG00000114982.13	KANSL3	-0.17914	0.0434317
ENSG00000065427.10	KARS	0.200508	0.00348641
ENSG00000103510.15	KAT8	0.199983	0.0105131
ENSG00000102781.9	KATNAL1	0.424039	0.000108735
ENSG00000253633.1	KB-1980E6.3	0.500624	0.00127532
ENSG00000182359.10	KBTBD3	-0.703213	0.00108292
ENSG00000165572.6	KBTBD6	0.357609	3.94294e-06
ENSG00000163376.7	KBTBD8	0.516566	1.26909e-12
ENSG00000177272.7	KCNA3	0.179965	0.0357259
ENSG00000151079.6	KCNA6	0.752556	2.61197e-21
ENSG00000170049.5	KCNAB3	-0.499017	0.0461006
ENSG00000116396.9	KCNC4	-0.589386	3.61962e-05
ENSG00000135519.6	KCNH3	0.602821	0.0378693
ENSG00000182324.5	KCNJ14	0.27991	0.0367259
ENSG00000162728.4	KCNJ9	-0.890528	0.00048997
ENSG00000135750.10	KCNK1	0.209051	0.0343745
ENSG00000099337.3	KCNK6	-0.967226	1.23853e-09
ENSG00000143603.14	KCNN3	0.172981	0.0146791
ENSG00000185760.11	KCNQ5	0.167783	0.0265392
ENSG00000134504.8	KCTD1	-0.553364	0.00018113
ENSG00000110906.8	KCTD10	0.253983	0.00167237
ENSG00000213859.3	KCTD11	-1.02027	0.00208438
ENSG00000174943.5	KCTD13	-0.460392	9.51908e-06
ENSG00000155729.8	KCTD18	-0.339644	0.0122766
ENSG00000180901.6	KCTD2	-0.598706	3.68215e-11
ENSG00000188997.3	KCTD21	-1.3399	0.00156463
ENSG00000167977.4	KCTD5	-0.300093	0.00084967
ENSG00000168301.8	KCTD6	-0.29209	0.0379393
ENSG00000243335.4	KCTD7	-0.431531	1.32947e-05
ENSG00000136240.5	KDELR2	-0.17038	0.0199
ENSG00000100196.6	KDELR3	0.392497	0.0231232
ENSG00000173120.10	KDM2A	-0.301225	9.54478e-05
ENSG00000115548.12	KDM3A	-0.254951	0.00482079
ENSG00000066135.8	KDM4A	-0.193679	0.0485957
ENSG00000126012.7	KDM5C	0.182768	0.0236384
ENSG00000132510.6	KDM6B	-0.552705	3.75585e-07
ENSG00000155666.7	KDM8	-0.361807	0.00219328
ENSG00000121774.13	KHDRBS1	0.201711	0.00273522
ENSG00000138030.8	KHK	-0.335232	0.0376211
ENSG00000100441.5	KHNYN	-0.285689	0.000147074
ENSG00000235750.5	KIAA0040	0.156093	0.0469496
ENSG00000226777.3	KIAA0125	0.350359	0.000128515
ENSG00000081791.4	KIAA0141	-0.266965	0.00172308
ENSG00000177728.10	KIAA0195	0.497017	4.08076e-08
ENSG00000145016.9	KIAA0226	0.407543	2.66023e-09
ENSG00000100647.7	KIAA0247	0.218508	0.00718456
ENSG00000142687.13	KIAA0319L	0.327889	1.55055e-05
ENSG00000166398.8	KIAA0355	-0.227242	0.0400417
ENSG00000258790.1	KIAA0391	0.617946	0.0311033
ENSG00000198920.5	KIAA0753	0.492903	1.83044e-05
ENSG00000196123.8	KIAA0895L	-0.567271	1.21717e-07
ENSG00000132680.6	KIAA0907	0.375839	2.92856e-08
ENSG00000121210.11	KIAA0922	0.159781	0.012478
ENSG00000136051.9	KIAA1033	0.1931	0.0215195
ENSG00000163807.4	KIAA1143	0.200852	0.0498708
ENSG00000164976.8	KIAA1161	-0.62306	5.30197e-10
ENSG00000122203.10	KIAA1191	0.298829	0.000236106
ENSG00000198954.4	KIAA1279	-0.56079	3.70277e-07
ENSG00000164944.7	KIAA1429	0.17437	0.014645
ENSG00000107036.7	KIAA1432	0.239852	0.000149237
ENSG00000084444.9	KIAA1467	-0.289465	0.00597716
ENSG00000163507.9	KIAA1524	0.241393	0.00796266
ENSG00000122778.5	KIAA1549	-0.449532	0.0382858
ENSG00000110427.10	KIAA1549L	0.211374	0.0134057
ENSG00000168116.9	KIAA1586	-0.427663	0.000452646
ENSG00000173214.5	KIAA1919	-0.195381	0.0419684
ENSG00000176542.5	KIAA2018	-0.20533	0.0167631
ENSG00000183354.7	KIAA2026	-0.180695	0.0244487
ENSG00000134313.10	KIDINS220	-0.191966	0.0121057
ENSG00000138160.4	KIF11	0.320983	1.77716e-06
ENSG00000197892.8	KIF13B	-0.202477	0.0278073
ENSG00000118193.7	KIF14	0.20164	0.0161124
ENSG00000163808.12	KIF15	0.554293	4.67649e-09
ENSG00000121621.6	KIF18A	0.498791	9.1703e-12
ENSG00000186185.9	KIF18B	0.205401	0.0186241
ENSG00000112984.7	KIF20A	0.259878	0.0010164
ENSG00000138182.10	KIF20B	0.291881	0.00434441
ENSG00000079616.8	KIF22	0.17559	0.00841434
ENSG00000137807.9	KIF23	0.22904	0.00164115
ENSG00000186638.11	KIF24	0.545814	4.07255e-13
ENSG00000165115.10	KIF27	-0.512082	0.00498128
ENSG00000142945.8	KIF2C	0.167655	0.0220974
ENSG00000101350.6	KIF3B	0.576699	1.66769e-15
ENSG00000084731.9	KIF3C	-0.37077	0.0249578
ENSG00000090889.10	KIF4A	0.283921	0.000511968
ENSG00000155980.7	KIF5A	-0.653171	5.68607e-07
ENSG00000170759.10	KIF5B	0.313395	2.49994e-05
ENSG00000088727.8	KIF9	0.660942	5.76199e-07
ENSG00000237649.3	KIFC1	0.26998	0.000546236
ENSG00000140859.11	KIFC3	-2.09919	0.0251061
ENSG00000151657.7	KIN	-0.269372	0.0325941
ENSG00000174996.7	KLC2	-0.545978	2.27363e-10
ENSG00000104892.12	KLC3	-1.37046	0.0116966
ENSG00000137171.10	KLC4	-0.319431	0.0155303
ENSG00000105610.4	KLF1	-2.79374	0.0324267
ENSG00000155090.10	KLF10	0.268394	0.000117444
ENSG00000118922.12	KLF12	0.227078	0.00155282
ENSG00000163884.3	KLF15	0.269078	0.0155415
ENSG00000127528.5	KLF2	0.567496	0.0283784
ENSG00000067082.10	KLF6	0.578412	2.4783e-15
ENSG00000197705.5	KLHL14	0.54762	0.000203243
ENSG00000174010.9	KLHL15	0.181291	0.0471802
ENSG00000187961.9	KLHL17	-0.678411	2.12684e-05
ENSG00000162413.12	KLHL21	-1.10188	4.15483e-23
ENSG00000114796.11	KLHL24	0.398483	3.34664e-08
ENSG00000183655.11	KLHL25	-0.585064	0.000566425
ENSG00000167487.7	KLHL26	-0.87448	4.21457e-12
ENSG00000135686.8	KLHL36	-0.426756	7.24989e-08
ENSG00000109790.12	KLHL5	0.180535	0.0298401
ENSG00000172578.7	KLHL6	0.399395	1.41436e-11
ENSG00000227268.3	KLLN	0.435029	3.99142e-05
ENSG00000139187.5	KLRG1	0.387713	0.0160676
ENSG00000213809.4	KLRK1	0.590749	7.67473e-06
ENSG00000117009.7	KMO	0.384331	0.000714889
ENSG00000118058.16	KMT2A	-0.144247	0.0329524
ENSG00000055609.13	KMT2C	0.150483	0.0239037
ENSG00000167548.10	KMT2D	-0.206132	0.00781386
ENSG00000005483.15	KMT2E	0.168245	0.0224542
ENSG00000128944.9	KNSTRN	0.38523	2.28128e-07
ENSG00000182481.4	KPNA2	0.309643	7.8829e-07
ENSG00000025800.9	KPNA6	0.269152	0.000222385
ENSG00000108424.5	KPNB1	0.214344	0.000332785
ENSG00000118162.9	KPTN	0.841534	2.98164e-16
ENSG00000133619.13	KRBA1	-0.289521	0.0148218
ENSG00000147121.11	KRBOX4	-0.347934	0.0376752
ENSG00000129347.15	KRI1	-0.529268	3.04439e-09
ENSG00000163463.7	KRTCAP2	-0.402958	0.00327231
ENSG00000105700.6	KXD1	-0.309567	0.00408861
ENSG00000185513.10	L3MBTL1	-0.864033	6.47288e-18
ENSG00000179630.6	LACC1	0.244672	0.0210106
ENSG00000135537.12	LACE1	0.307193	0.0199401
ENSG00000053747.11	LAMA3	0.606791	0.000139361
ENSG00000091136.9	LAMB1	-0.814569	1.19308e-08
ENSG00000005893.11	LAMP2	0.188613	0.0154715
ENSG00000132434.5	LANCL2	0.343784	1.53541e-05
ENSG00000068697.6	LAPTM4A	-0.492212	1.00422e-05
ENSG00000162511.7	LAPTM5	0.232058	0.00229795
ENSG00000107929.10	LARP4B	0.194283	0.00354625
ENSG00000011376.5	LARS2	0.50789	4.10597e-13
ENSG00000086730.12	LAT2	0.360686	6.66307e-08
ENSG00000131023.8	LATS1	0.177579	0.0188114
ENSG00000122188.8	LAX1	0.703812	4.4252e-21
ENSG00000143815.10	LBR	0.259041	0.000403228
ENSG00000179528.11	LBX2	-1.13896	0.00123168
ENSG00000205629.7	LCMT1	-0.32078	0.00336766
ENSG00000168806.6	LCMT2	-0.361611	0.00057541
ENSG00000184925.7	LCN12	-0.938591	0.00730763
ENSG00000178177.10	LCORL	0.232703	0.00551863
ENSG00000136167.9	LCP1	0.270403	4.72573e-05
ENSG00000134333.9	LDHA	0.223806	0.00110837
ENSG00000111716.8	LDHB	0.215547	0.0190331
ENSG00000130164.7	LDLR	0.516887	3.82596e-14
ENSG00000168675.14	LDLRAD4	0.331875	2.18825e-05
ENSG00000164406.7	LEAP2	-0.37731	0.0429403
ENSG00000161904.7	LEMD2	-0.424488	2.10555e-07
ENSG00000182909.5	LENG9	-0.660965	1.27258e-06
ENSG00000117385.11	LEPRE1	-0.407487	2.29464e-06
ENSG00000213625.4	LEPROT	-0.19911	0.0427544
ENSG00000168924.10	LETM1	0.19074	0.00961216
ENSG00000165046.8	LETM2	-0.873093	9.70837e-06
ENSG00000050426.11	LETMD1	-0.450955	1.21717e-07
ENSG00000116977.14	LGALS8	-0.275219	0.0304883
ENSG00000104826.7	LHB	0.475649	0.0324991
ENSG00000105486.9	LIG1	0.319161	3.98354e-06
[truncated: 2,470 more rows]
