# Supplementary material for: MYC regulates ribosome biogenesis and mitochondrial gene expression programs through its interaction with host cell factor–1
Source: eLife. 2021 Jan 8;10:e60191. doi: 10.7554/eLife.60191 (PMC7793627; doi:10.7554/eLife.60191)
Supplement: Figure 4—source data 3. [file elife-60191-fig4-data3.xlsx]

## Sheet: Sheet1
Feature	Feature_gene_name	log2FoldChange	padj
ENSG00000113161.11	HMGCR	0.571719	2.22809e-38
ENSG00000186480.8	INSIG1	0.579811	2.1977e-28
ENSG00000110921.7	MVK	0.661306	4.56018e-25
ENSG00000172893.11	DHCR7	0.556144	2.00991e-21
ENSG00000130164.7	LDLR	0.478103	5.20247e-21
ENSG00000099194.5	SCD	0.390315	3.50365e-20
ENSG00000052802.8	MSMO1	0.559816	9.6751e-20
ENSG00000167508.6	MVD	0.503621	1.2596e-17
ENSG00000112972.10	HMGCS1	0.449714	2.00677e-17
ENSG00000160285.10	LSS	0.479476	9.38406e-17
ENSG00000134824.9	FADS2	0.41744	5.08741e-16
ENSG00000104549.7	SQLE	0.419333	7.18347e-16
ENSG00000116133.7	DHCR24	0.331808	8.13642e-13
ENSG00000011021.17	CLCN6	0.485065	1.08943e-11
ENSG00000130766.4	SESN2	0.467037	3.58968e-10
ENSG00000181577.11	C6orf223	0.567025	1.59119e-09
ENSG00000079459.8	FDFT1	0.277956	5.86693e-09
ENSG00000149485.12	FADS1	0.290633	1.55911e-08
ENSG00000106809.6	OGN	-0.88135	2.3139e-08
ENSG00000177000.6	MTHFR	0.43536	3.17989e-08
ENSG00000120437.7	ACAT2	0.357252	5.07217e-08
ENSG00000185811.12	IKZF1	0.23878	5.4201e-08
ENSG00000157514.12	TSC22D3	0.840668	1.5148e-07
ENSG00000100290.2	BIK	0.320853	1.5148e-07
ENSG00000168386.14	FILIP1L	-0.689291	2.23295e-07
ENSG00000068137.10	PLEKHH3	0.346506	3.06863e-07
ENSG00000067064.6	IDI1	0.35023	1.00513e-06
ENSG00000109929.5	SC5D	0.386841	1.35354e-06
ENSG00000160752.10	FDPS	0.273138	3.00909e-06
ENSG00000128965.7	CHAC1	0.743373	4.76029e-06
ENSG00000113070.6	HBEGF	0.372384	5.67625e-06
ENSG00000164733.16	CTSB	0.507761	9.07865e-06
ENSG00000172578.7	KLHL6	0.194959	2.53937e-05
ENSG00000169710.6	FASN	0.269488	3.65618e-05
ENSG00000185813.6	PCYT2	0.303522	4.80687e-05
ENSG00000102595.14	UGGT2	-0.302739	5.93674e-05
ENSG00000165175.11	MID1IP1	0.271795	8.52069e-05
ENSG00000164180.9	TMEM161B	-0.331037	9.41358e-05
ENSG00000228253.1	MT-ATP8	-0.268632	0.000129673
ENSG00000111679.12	PTPN6	0.506181	0.000180562
ENSG00000139428.7	MMAB	0.322727	0.000301417
ENSG00000101255.6	TRIB3	0.336725	0.000315312
ENSG00000138835.18	RGS3	0.308436	0.000416558
ENSG00000109084.9	TMEM97	0.233115	0.000470361
ENSG00000182162.5	P2RY8	0.190763	0.00056233
ENSG00000128272.10	ATF4	0.17583	0.000686556
ENSG00000082269.12	FAM135A	-0.257176	0.000726467
ENSG00000132196.9	HSD17B7	0.339545	0.000788912
ENSG00000197969.7	VPS13A	-0.21488	0.000882864
ENSG00000169435.9	RASSF6	-0.283522	0.000943137
ENSG00000121104.3	FAM117A	0.311033	0.000943137
ENSG00000137101.8	CD72	0.31333	0.00116213
ENSG00000160326.9	SLC2A6	0.272066	0.00124878
ENSG00000178177.10	LCORL	-0.300565	0.00178348
ENSG00000235878.4	AP001468.1	0.846478	0.00188753
ENSG00000172209.4	GPR22	-0.60958	0.00206015
ENSG00000116194.8	ANGPTL1	-0.56302	0.00295708
ENSG00000131473.12	ACLY	0.14784	0.00519691
ENSG00000137936.12	BCAR3	0.32002	0.00532253
ENSG00000149311.13	ATM	-0.197752	0.00652219
ENSG00000100889.7	PCK2	0.245812	0.00652219
ENSG00000101846.6	STS	0.225299	0.00853808
ENSG00000048392.7	RRM2B	-0.221276	0.0116111
ENSG00000203737.2	GPR52	-0.645386	0.0119556
ENSG00000094963.9	FMO2	-0.493594	0.0166223
ENSG00000153162.8	BMP6	0.267429	0.0175707
ENSG00000117569.14	PTBP2	-0.261269	0.0193707
ENSG00000176049.11	JAKMIP2	0.33397	0.0193707
ENSG00000092140.10	G2E3	-0.244687	0.0194101
ENSG00000075292.14	ZNF638	-0.19448	0.0194101
ENSG00000073464.7	CLCN4	0.273661	0.020156
ENSG00000197471.7	SPN	0.154201	0.0220091
ENSG00000110324.5	IL10RA	-0.269373	0.0222008
ENSG00000164211.8	STARD4	0.250654	0.0246797
ENSG00000136560.9	TANK	-0.221208	0.0246797
ENSG00000122188.8	LAX1	0.219681	0.0246797
ENSG00000079432.3	CIC	0.171527	0.0250659
ENSG00000198113.2	TOR4A	0.265877	0.0250659
ENSG00000147383.6	NSDHL	0.288833	0.0250659
ENSG00000091879.9	ANGPT2	-0.527622	0.0250659
ENSG00000106823.8	ECM2	-0.501208	0.026855
ENSG00000077454.11	LRCH4	0.194629	0.0361605
ENSG00000137078.4	SIT1	0.196306	0.037862
ENSG00000134294.9	SLC38A2	0.47684	0.0388873
ENSG00000135976.12	ANKRD36	-0.201214	0.0402893
ENSG00000159674.7	SPON2	0.289296	0.0403214
ENSG00000111252.6	SH2B3	0.173847	0.0403214
ENSG00000134061.4	CD180	0.218681	0.0408344
ENSG00000143772.5	ITPKB	0.182929	0.0408784
ENSG00000174944.4	P2RY14	-0.648804	0.0422068
ENSG00000117501.10	MROH9	-0.41643	0.0422068
ENSG00000168209.4	DDIT4	0.710297	0.0422168
ENSG00000226397.3	C12orf77	0.334923	0.0426249
ENSG00000112234.4	FBXL4	-0.229676	0.0439312
ENSG00000239264.4	TXNDC5	0.272962	0.0445222
ENSG00000169403.7	PTAFR	0.293903	0.0469731
ENSG00000090861.11	AARS	0.140187	0.0494282
ENSG00000157796.13	WDR19	-0.236141	0.0494282
