# Supplementary material for: MYC regulates ribosome biogenesis and mitochondrial gene expression programs through its interaction with host cell factor–1
Source: eLife. 2021 Jan 8;10:e60191. doi: 10.7554/eLife.60191 (PMC7793627; doi:10.7554/eLife.60191)
Supplement: Figure 5—source data 1. [file elife-60191-fig5-data1.xlsx]

## Sheet: Sheet1
Chr	Start	End	Distance to TSS	Gene Name
chr12	58148640	58148873	-125	MARCH9
chr19	58858973	58859290	-4205	A1BG-AS1
chr17	41116336	41116671	12	AARSD1
chr11	105948222	105948457	47	AASDHPPT
chr17	35306031	35306321	1	AATF
chr9	107730650	107730977	-40286	ABCA1
chr16	2390677	2391106	-32	ABCA17P
chr17	67323192	67323455	0	ABCA5
chr19	1039864	1040263	-39	ABCA7
chr1	229694621	229694920	-328	ABCB10
chr1	94883752	94884013	-51	ABCD3
chr3	183903589	183904045	-46	ABCF3
chr21	43654803	43655081	14934	ABCG1
chr3	111697700	111697924	89	ABHD10
chr3	43732212	43732508	-2	ABHD5
chr4	84406180	84406487	-2	ABRAXAS1
chr3	128598165	128598615	57	ACAD9
chr6	160182792	160183198	6	ACAT2
chr16	67694061	67694457	459	ACD
chr19	6199373	6200011	64048	ACSBG2
chr4	185746686	185746905	473	ACSL1
chr19	39137990	39138424	-49	ACTN4
chr2	65434868	65435100	-19845	ACTR2
chr12	100593184	100593485	-531	ACTR6
chr3	53916042	53916397	10	ACTR8
chr15	59041956	59042339	30	ADAM10
chr1	32253603	32253911	-24093	ADGRB2
chr4	100009754	100010002	61	ADH5
chr2	3522468	3523223	505	ADI1
chr15	73075880	73076192	90	ADPGK
chr4	87856114	87856352	79	AFF1
chr16	90038748	90039295	33	AFG3L1P
chr18	12377006	12377290	127	AFG3L2
chr7	100136304	100136647	-359	AGFG2
chr1	247095100	247095702	-121	AHCTF1
chr7	6049057	6049272	282	AIMP2
chr11	67250658	67250911	-203	AIP
chr9	4741095	4741419	52	AK3
chr17	55162335	55162628	-72	AKAP1
chr19	15490602	15490966	-172	AKAP8
chr6	88411901	88412155	-43	AKIRIN2
chr1	19638536	19638765	-10	AKR7A2
chr19	40791316	40791612	-162	AKT2
chr16	53537378	53537709	-327	AKTIP
chr3	52231925	52232279	3	ALAS1
chr19	49956513	49956787	177	ALDH16A1
chr16	30076252	30076635	-551	ALDOA
chr1	63833116	63833375	-16	ALG6
chr7	102105189	102105440	7	ALKBH4
chr17	18086939	18087236	220	ALKBH5
chr5	34008123	34008472	-77	AMACR
chr17	62971529	62971862	8	AMZ2P1
chr2	112641707	112641935	-80	ANAPC1
chr17	79849444	79849742	4	ANAPC11
chr9	140082932	140083238	-28	ANAPC2
chr12	110841711	110842092	-366	ANAPC7
chr1	213189078	213189361	-2	ANGEL2
chr19	10206815	10207210	6321	ANGPTL6
chr5	139781134	139781415	-125	ANKHD1
chr11	67056288	67056639	-299	ANKRD13D
chr10	27389223	27389725	-47	ANKRD26
chr16	46427375	46427670	175487	ANKRD26P1
chr16	46391325	46391569	211562	ANKRD26P1
chr16	46403488	46403710	199410	ANKRD26P1
chr16	46388344	46388593	214541	ANKRD26P1
chr16	46399424	46399636	203479	ANKRD26P1
chr5	74532692	74532945	-115	ANKRD31
chr4	186317386	186317835	-230	ANKRD37
chr7	117854532	117854835	-10029	ANKRD7
chr1	150185757	150186113	21091	ANP32E
chr14	24036545	24036906	-3	AP1G2
chr19	16308460	16308791	-40	AP1M1
chr7	100797530	100797744	-42	AP1S1
chr17	33914142	33914360	-31	AP2B1
chr3	183892449	183892782	-19	AP2M1
chr19	47363651	47364115	-9631	AP2S1
chr5	77590371	77590772	8	AP3B1
chr20	3800990	3801340	-6	AP5S1
chr19	3761576	3761802	-16	APBA3
chr4	41218335	41218766	-1915	APBB2
chr5	112042985	112043346	-37	APC
chr2	68694318	68694869	-98	APLF
chr11	116706636	116706931	-50	APOA1-AS
chr22	36520016	36520339	36800	APOL3
chr12	12939776	12940139	1416	APOLD1
chr1	228270102	228270427	-97	ARF1
chr3	57583069	57583400	-19	ARF4
chr22	43253206	43253615	-2	ARFGAP3
chr19	1074829	1075225	-1606	ARHGAP45
chr19	7459875	7460131	4	ARHGEF18
chr10	104474019	104474385	-12	ARL3
chr12	123465108	123465519	706	ARL6IP4
chr6	109169431	109169771	-18	ARMC2
chr16	31471072	31471358	898	ARMC5
chr19	19144164	19144731	60	ARMC6
chr17	73105841	73106452	99	ARMC7
chr7	98923318	98923642	-16	ARPC1A
chr2	219081605	219081927	-51	ARPC2
chr1	183604892	183605171	45	ARPC5
chr9	140513167	140513483	22	ARRDC1-AS1
chr5	90679022	90679394	-18	ARRDC3
chr5	78280421	78280719	1040	ARSB
chr5	94890614	94890965	-36	ARSK
chr12	48551237	48551552	-16	ASB8
chr10	73975888	73976217	147	ASCC1
chr2	190525892	190526268	-45	ASDURF
chr2	26101344	26101677	-125	ASXL2
chr1	1447356	1447668	-11	ATAD3A
chr1	1406983	1407289	1	ATAD3B
chr2	234160070	234160338	-13	ATG16L1
chr11	72533069	72533434	7800	ATG16L2
chr3	11313871	11314195	23	ATG7
chr19	19774027	19774271	354	ATP13A1
chr19	1240166	1240497	-1418	ATP5F1D
chr12	54069678	54070052	1	ATP5MC2
chr4	668043	668448	-118	ATP5ME
chr14	104387777	104387995	17	ATP5MPL
chr21	35288000	35288309	4	ATP5PO
chr16	67515056	67515297	-87	ATP6V0D1
chr7	149570848	149571268	-107	ATP6V0E2-AS1
chr8	104033090	104033420	7	ATP6V1C1
chr7	128502668	128502977	-35	ATP6V1F
chr9	117349836	117350147	-3	ATP6V1G1
chr1	47133617	47133841	370	ATPAF1
chr16	28835469	28835766	1248	ATXN2L
chr17	42277157	42277392	-1745	ATXN7L3
chr12	74931397	74931682	-12	ATXN7L3B
chr9	94124071	94124403	14	AUH
chr17	8103472	8103740	9937	AURKB
chr15	34330676	34330999	466	AVEN
chr1	179334695	179334989	-13	AXDND1
chr17	81009654	81009873	-77	B3GNTL1
chr2	28113451	28113767	127	BABAM2
chr16	87984559	87985196	-161	BANP
chr16	56553855	56554149	6	BBS2
chr16	75299806	75300033	-12	BCAR1
chr12	25099418	25099714	2827	BCAT1
chr1	85742236	85742646	146	BCL10
chr6	136610386	136610710	441	BCLAF1
chr12	120426658	120426931	-854	BICDL1
chr2	32581885	32582223	-42	BIRC6
chr10	102046268	102046638	16	BLOC1S2
chr4	6717557	6717994	-67	BLOC1S4
chr6	8064490	8064777	14	BLOC1S5
chr22	22652270	22652686	15	BMS1P20
chr7	112580065	112580299	-250	BMT2
chr10	133795339	133795697	-1	BNIP3
chr10	104613843	104614115	12	BORCS7-ASMT
chr3	10157201	10157449	-8	BRK1
chr19	572198	572613	-49	BSG
chr3	49591659	49591994	-27	BSN-DT
chr14	93799304	93799532	20	BTBD7
chr3	15643358	15643653	29	BTD
chr5	72794008	72794347	-73	BTF3
chr10	103113597	103113940	-22	BTRC
chr10	124713691	124714109	19	C10orf88
chr11	114271105	114271477	-19	C11orf71
chr11	66511982	66512289	-72	C11orf80
chr15	83680199	83680621	-17	C15orf40
chr16	9185004	9185239	-416	C16orf72
chr16	46865042	46865294	151	C16orf87
chr18	51884071	51884453	-25	C18orf54
chr19	14192129	14192449	4318	C19orf67
chr19	51897724	51897985	-4026	C19orf84
chrX	119763792	119764160	29	C1GALT1C1
chr1	53685890	53686391	171	C1orf123
chr1	231376798	231377069	0	C1orf131
chr1	1051512	1051779	91	C1orf159
chr1	228290893	228291305	64	C1orf35
chr1	43232607	43233073	-76	C1orf50
chr1	197871932	197872229	398	C1orf53
chr1	156426357	156426625	-27151	C1orf61
chr1	209957719	209958098	167	C1orf74
chr20	3388702	3388988	-536	C20orf194
chr21	45759008	45759466	48	C21orf2
chr22	38349499	38349818	-4	C22orf23
chr2	99757721	99758317	-57	C2orf15
chr2	61372011	61372381	-7	C2orf74
chr3	88198756	88199008	-11	C3orf38
chr3	143690700	143690943	181	C3orf58
chr4	120221671	120221985	140	C4orf3
chr4	2043631	2043855	23	C4orf48
chr5	134181402	134181764	-75	C5orf24
chr7	1067893	1068219	12	C7orf50
chr8	96281344	96281722	-71	C8orf37
chr9	77567639	77567987	-11	C9orf40
chr22	24407570	24407817	-72	CABIN1
chr12	2144172	2144470	-13197	CACNA1C-IT2
chr1	174968699	174969278	96	CACYBP
chr9	138799475	138799757	-611	CAMSAP1
chr17	77005770	77006134	-53	CANT1
chr3	15247482	15247890	-47	CAPN7
chr19	36630721	36631046	55	CAPNS1
chr19	36618902	36619129	-11813	CAPNS1
chr7	116502288	116502701	-69	CAPZA2
chr9	77643204	77643524	-18	CARNMT1
chrX	41782833	41783175	-717	CASK
chr7	142985219	142985610	106	CASP2
chr5	95998530	95998773	-32	CAST
chr7	99869726	99870052	-34	CASTOR3
chr19	5720355	5720851	-85	CATSPERD
chr1	244624410	244624676	-130	CATSPERE
chr9	103361079	103361357	20857	CAVIN4
chr16	67062712	67062983	-203	CBFB
chr4	169931445	169931662	-85	CBR4
chr17	46178723	46178999	22	CBX1
chr12	54673733	54674174	-38	CBX5
chr22	39052462	39052835	-10	CBY1
chr5	179105389	179105835	2363	CBY3
chr19	14016787	14017133	4	CC2D1A
chr1	52831734	52832062	-21	CC2D1B
chr9	35658136	35658429	-5	CCDC107
chr3	47017773	47018215	-3	CCDC12
chr19	18043618	18043852	-89	CCDC124
chr19	13842412	13842706	-15	CCDC130
chr7	76751665	76751899	-152	CCDC146
chr2	197504223	197504556	33	CCDC150
chr6	37467599	37467819	-9	CCDC167
chr19	46498202	46498475	-381	CCDC61
chr11	60609335	60609577	27	CCDC86
chr11	66360472	66360751	-57	CCDC87
chr11	85393831	85394080	3365	CCDC89
chr2	118771601	118771932	-27	CCDC93
chr19	41815909	41816207	-10	CCDC97
chr4	78077704	78078043	-484	CCNG2
chr4	77997293	77997694	-368	CCNI
chr3	156892637	156893019	-14279	CCNL1
chr2	135676096	135676479	-105	CCNT2
chr10	86088118	86088412	-80	CCSER2
chr5	10250158	10250773	-184	CCT5
chr9	5450412	5450662	34	CD274
chr19	8373040	8373430	5	CD320
chr15	43029179	43029482	-4	CDAN1
chr1	43814627	43814930	-9848	CDC20
chr19	531408	531717	-171	CDC34
chr1	22378859	22379264	-59	CDC42
chr5	130599524	130599797	-42	CDC42SE2
chr6	44355125	44355769	196	CDC5L
chr1	91966211	91966741	72	CDC7
chr1	1655747	1656025	-27	CDK11B
chr11	67276039	67276371	-6	CDK2AP2
chr5	133702682	133702999	-75	CDKL3
chr20	5107313	5107609	54	CDS2
chr16	88869906	88870219	-124	CDT1
chr20	48808337	48808560	158	CEBPB-AS1
chr2	37423481	37423742	7	CEBPZOS
chr3	48699090	48699339	1134	CELSR3
chrX	100352993	100353279	-35	CENPI
chr5	64858856	64859160	-13	CENPK
chr2	25015903	25016186	60	CENPO
chr1	10490582	10490949	-39	CENPS-CORT
chr4	185655128	185655484	-20	CENPU
chr1	243418493	243418837	43	CEP170
chr3	196438943	196439328	30	CEP19
chr11	93394517	93394874	-121	CEP295
chr6	109416190	109416521	530	CEP57L1
chr3	134204887	134205169	13	CEP63
chr5	612280	612517	-7	CEP72
chr6	88118076	88118555	625	CFAP206
chr2	55746540	55746790	-66	CFAP36
chr17	9479801	9480044	-22	CFAP52
chr18	47792876	47793097	-94	CFAP53
chr16	75467259	75467859	-172	CFDP1
chr8	61564749	61565039	-26430	CHD7
chr16	53088718	53088949	-72	CHD9
chr22	51021366	51021680	68	CHKB-DT
chr18	11851167	11851430	-91	CHMP1B
chr19	59066393	59066766	-88	CHMP2A
chr3	87276298	87276529	0	CHMP2B
chr2	86790488	86790796	-22	CHMP3
chr8	23103725	23104190	-148	CHMP7
chr11	89956127	89956421	258	CHORDC1
chr2	220408328	220408654	-4	CHPF
chr16	75551206	75551503	17714	CHST5
chr16	69166325	69166619	21	CHTF8
chr1	153606297	153606615	-2	CHTOP
chr2	96931681	96932396	154	CIAO1
chr19	42783938	42784312	-4692	CIC
chr14	77564457	77564839	70	CIPC
chr19	1260973	1261214	-8172	CIRBP
chr19	1269571	1269895	466	CIRBP
chr10	60028729	60029045	25	CISD1
chr4	103790058	103790559	173	CISD2
chr16	66586247	66586655	-15	CKLF
chr1	154947228	154947564	278	CKS1B
chr9	91925477	91925936	-404	CKS2
chr15	74906864	74907136	-335	CLK3
chr13	77565929	77566341	76	CLN5
chr8	1711812	1712114	93	CLN8
chr4	56412985	56413294	-63	CLOCK
chr5	1345142	1345439	-105	CLPTM1L
chr12	22199408	22199637	414	CMAS
chr16	81040407	81040667	-13	CMC2
chr3	128902711	128902945	-18	CNBP
chr14	54908055	54908320	-39	CNIH1
chr2	97481861	97482109	-6	CNNM3
chr16	58663904	58664196	-260	CNOT1
chr2	101840252	101840466	-28986	CNOT11
chr7	135194651	135195069	15	CNOT4
chr2	219433085	219433399	-61	CNOT9
chr2	220042755	220043010	14	CNPPD1
chr7	99717077	99717394	-30	CNPY4
chr1	246729432	246729810	-18	CNST
chr9	17134811	17135108	-30	CNTLN
chr17	7835304	7835534	20	CNTROB
chr1	230778127	230778586	154	COG2
chr13	40229620	40229903	-3	COG6
chr17	55037923	55038239	330	COIL
chr19	17716703	17717001	50449	COLGALT1
chr4	47465634	47465983	-61	COMMD8
chr1	176176314	176176937	-245	COP1
chr3	139108407	139108665	-14	COPB2
chr2	198317862	198318281	-76	COQ10B
chr4	84205888	84206109	-50	COQ2
chr6	99841712	99842075	189	COQ3
chr17	27944090	27944421	880	CORO6
chr3	119396194	119396475	-91	COX17
chr4	73935329	73935640	-8	COX18
chr2	98262294	98262536	-106	COX5B
chr12	120875502	120875882	-201	COX6A1
chr2	42588511	42588727	-236	COX7A2L
chr1	16563497	16563855	-17	CPLANE2
chr11	61197362	61197666	-50	CPSF7
chr1	197170458	197170753	13	CRB1
chr11	46264827	46265182	-34185	CREB3L1
chr10	35415482	35415712	-172	CREM
chr22	21271525	21271797	-53	CRKL
chr1	17240461	17240794	-7818	CROCC
chr19	18794193	18794584	-37	CRTC1
chr12	56693754	56693972	312	CS
chr12	53574192	53574435	117	CSAD
chr5	148930952	148931297	-9	CSNK1A1
chr20	54967555	54967824	-18	CSTF1
chr4	1242218	1242603	498	CTBP1
chr16	67596358	67596584	161	CTCF
chr1	41444984	41445604	323	CTPS1
chr19	51611826	51612186	-359	CTU1
chr19	7991009	7991249	-78	CTXN1
chr13	113862906	113863222	-22	CUL4A
chr10	101491875	101492095	27	CUTC
chr5	64331207	64331458	266587	CWC27
chr2	137181107	137181370	-305513	CXCR4
chr2	136875620	136875968	-69	CXCR4
chrX	40506695	40507040	-48	CXorf38
chr18	47814013	47814289	541	CXXC1
chr17	7760437	7760675	-489	CYB5D1
chr7	25164884	25165293	-108	CYCS
chr9	140117982	140118403	-895	CYSRT1
chr2	242673937	242674179	64	D2HGDH
chr14	59655220	59655467	-38	DAAM1
chr14	23058017	23058348	-39	DAD1
chr3	49507407	49507665	-29	DAG1
chr7	6487390	6487824	36	DAGLB
chr3	49055377	49055666	520	DALRD3
chr19	1407151	1407609	-188	DAZAP1
chr9	34126603	34126861	39	DCAF12
chr1	160232119	160232509	4	DCAF8
chr5	112312101	112312350	-182	DCP2
chr13	95201530	95201843	-19	DCT
chr16	23652491	23652883	0	DCTN5
chr8	30013996	30014324	347	DCTN6
chr13	114144917	114145131	-1	DCUN1D2
chr12	57914460	57914788	-324	DDIT3
chr20	3184872	3185314	250	DDRGK1
chr11	108535642	108535857	-3	DDX10
chr12	31226623	31226939	0	DDX11-AS1
chr2	114361175	114361579	-83	DDX11L2
chr12	9600696	9600978	-69	DDX12P
chr19	14529734	14530081	288	DDX39A
chr17	61851335	61851557	-103	DDX42
chr11	118662412	118662640	-554	DDX6
chr19	42721783	42722196	-45	DEDD2
chr19	42724167	42724509	-34	DEDD2
chr8	142138272	142138558	-296	DENND3
chr1	3773622	3774329	144	DFFB
chr22	19109858	19110107	-15	DGCR2
chr13	42623411	42623721	722	DGKH
chr4	967267	967559	-65	DGKQ
chr1	26758509	26758923	-57	DHDDS
chr17	27229977	27230298	-48	DHRS13
chr17	21030027	21030359	-48	DHRS7B
chr4	24586072	24586373	-38	DHX15
chr19	47852352	47852665	-30	DHX34
chr1	182808259	182808858	119	DHX9
chr14	95623686	95623929	-48	DICER1
chr20	61557866	61558114	-87	DIDO1
chr21	47878612	47878877	-118	DIP2A
chr15	40650247	40650565	-30	DISP2
chr7	107531403	107531815	57	DLD
chr13	50656201	50656521	56	DLEU1
chr20	35089487	35089889	-130	DLGAP4
chr10	70231572	70231931	-21	DNA2
chr9	33025556	33025859	506	DNAJA1
chr9	33044325	33044628	19275	DNAJA1
chr9	33025028	33025292	-41	DNAJA1
chr16	4475594	4476039	10	DNAJA3
chr19	14628959	14629584	100	DNAJB1
chr2	220143996	220144281	98	DNAJB2
chr7	157129451	157129788	-91	DNAJB6
chr7	108209906	108210324	-74	DNAJB9
chr12	56224489	56224725	-1187	DNAJC14
chr9	114393455	114393691	-59	DNAJC25
chr20	62526227	62526548	-68	DNAJC5
chr10	75006655	75007094	215	DNAJC9
chr19	10305234	10305836	195	DNMT1
chr2	25585008	25585224	-19657	DNMT3A
chr13	99739765	99740096	953	DOCK9-DT
chr9	131843505	131843865	302	DOLPP1
chr21	34960938	34961231	-70	DONSON
chr11	65101053	65101444	23	DPF2
chr12	64062221	64062584	-48	DPY19L2
chr7	102920594	102920887	19	DPY19L2P2
chr2	32264786	32265022	0	DPY30
chr8	26435231	26435614	82	DPYSL2
chr20	35402034	35402406	10	DSN1
chr20	17550580	17550808	95	DSTN
chr14	31926615	31926832	-43	DTD2
chr1	212208573	212209115	-51	DTL
chr6	15662504	15662759	658	DTNBP1
chr6	15663197	15663451	-35	DTNBP1
chr2	242626204	242626478	42	DTYMK
chr3	106959375	106959651	-26	DUBR
chr19	5791136	5791400	-19	DUS3L
chr19	5790614	5790881	502	DUS3L
chr14	102430598	102430826	-153	DYNC1H1
chr19	40324759	40325100	-56	DYRK1B
chr20	32274232	32274498	-155	E2F1
chr2	11606125	11606478	2	E2F6
chr11	19262607	19262916	-254	E2F8
chr14	35008839	35009093	-23	EAPP
chr8	110551861	110552132	67	EBAG9
chr11	85955378	85955720	123	EED
chr13	21347915	21348322	-21	EEF1AKMT1
chr11	62341387	62341689	-78	EEF1G
chr19	3987739	3988068	-2442	EEF2
chr19	3985409	3985715	-101	EEF2
chr11	64645960	64646189	166	EHD1
chr15	49170104	49170469	-4	EID1
chr19	40030677	40030956	22	EID2
chr19	40023297	40023739	-11	EID2B
chr17	39844732	39845137	-193	EIF1
chr17	39822169	39822514	-22786	EIF1
chr7	6098814	6099046	-70	EIF2AK1
chr12	124118192	124118441	7	EIF2B1
chr14	67826562	67827232	-137	EIF2S1
chr20	32699951	32700341	16	EIF2S2
chr8	109260915	109261167	-82	EIF3E
chr19	39109443	39109817	-82	EIF3K
chr4	99850260	99850521	-147	EIF4E
chr3	184032128	184032485	16	EIF4G1
chr17	7210529	7210880	-152	EIF5A
chr2	99953719	99953939	-5	EIF5B
chr19	11670046	11670352	-148	ELOF1
chr3	47554864	47555427	54	ELP6
chr1	121484470	121485352	224001	EMBP1
chr19	50979511	50979884	-37	EMC10
chr17	3571862	3572200	14	EMC6
chr2	42396237	42396462	-129	EML4
chr19	48837261	48837502	8125	EMP3
chr11	76155902	76156150	-43	EMSY
chr9	131580414	131580848	-148	ENDOG
chr17	78389106	78389436	28	ENDOV
chr1	8939227	8939479	459	ENO1-AS1
chr6	46097587	46097895	40	ENPP4
chr20	25176060	25176502	-25	ENTPD6
chr12	132568632	132568983	-21	EP400P1
chr1	29240711	29240944	-261	EPB41
chr19	16582655	16583030	-19	EPS15L1
chr10	50747023	50747328	-6	ERCC6
chr20	34129590	34129923	-22	ERGIC3
chr8	8860230	8860468	35	ERI1
chr8	681278	681498	-149	ERICH1
chr10	101945667	101945966	-2	ERLIN1
chr18	19180580	19180970	-82	ESCO1
chr11	64072605	64073061	-167	ESRRA
chr4	159593022	159593485	0	ETFDH
chr1	93250547	93250768	6	EVI5
chr6	692564	692820	449	EXOC2
chr3	38537664	38537946	42	EXOG
chr1	11159798	11160116	10	EXOSC10
chr9	133568962	133569337	2	EXOSC2
chr9	133556577	133556907	-12405	EXOSC2
chr19	41903154	41903468	-55	EXOSC5
chr11	44117037	44117335	87	EXT2
chr17	40896956	40897220	26	EZH1
chr11	70049162	70049527	75	FADD
chr1	150488032	150488422	-6	FALEC
chr17	71228346	71228632	44	FAM104A
chrX	55187550	55187796	-45	FAM104B
chr11	58869878	58870112	-4663	FAM111B
chr22	45705440	45706063	32	FAM118A
chr6	170615531	170615889	-100	FAM120B
chr9	71394745	71395144	22	FAM122A
chrX	133931147	133931365	6	FAM122B
chr19	17633982	17634336	49	FAM129C
chr7	92219052	92219590	63	FAM133B
chr11	6255804	6256018	30	FAM160A2
chr2	61991441	61991657	89729	FAM161A
chr8	11325057	11325303	-904	FAM167A
chr7	102389218	102389488	-46	FAM185A
chr4	15683177	15683576	24	FAM200B
chr10	5726441	5726818	-172	FAM208B
chr15	75199080	75199419	-14	FAM219B
chr7	6388436	6388882	-69	FAM220A
chr17	27169634	27170084	-2	FAM222B
chr12	13197140	13197485	-3	FAM234B
chr8	130951983	130952333	-7	FAM49B
chr8	7212664	7212921	93	FAM66B
chr8	124173248	124173513	-17907	FAM83A
chr2	33824189	33824618	26	FAM98A
chr16	89883028	89883315	-105	FANCA
chr2	242295541	242295778	-5	FARP2
chr2	223520660	223520995	247	FARSB
chr17	80056099	80056323	-105	FASN
chr2	170430343	170430564	-22	FASTKD1
chr16	30669074	30669506	-1550	FBRS
chr4	15656826	15657054	95	FBXL5
chr18	71814991	71815291	-41	FBXO15
chr12	117628270	117628499	-84	FBXO21
chr16	87417271	87417501	13	FBXO31
chr16	87425568	87425933	-37	FBXO31
chr1	16678844	16679147	-9	FBXO42
chr19	46220452	46220747	-2063	FBXO46
chr19	46234188	46234502	-194	FBXO46
chr6	153304671	153304936	-49	FBXO5
chr6	52930076	52930340	-49	FBXO9
chr9	139839116	139839374	-39	FBXW5
chr13	22245128	22245376	37	FGF9
chr10	93668268	93668543	853	FGFBP3
chr7	50517918	50518243	24	FIGNL1
chr4	54243578	54244012	-25	FIP1L1
chr7	100895498	100895875	-7315	FIS1
chr7	100888326	100888581	-82	FIS1
chr20	42939756	42940052	-12	FITM2
chr20	1373567	1373943	61	FKBP1A
chr11	64008409	64008710	-45	FKBP2
chr19	18654871	18655129	-594	FKBP8
chr16	86588688	86589091	-37	FLJ30679
chr5	42908929	42909298	84322	FLJ32255
chr11	63828289	63828573	-42931	FLRT1
chr16	2961737	2962013	-105	FLYWCH1
chr16	2933036	2933409	26	FLYWCH2
chr7	139024977	139025392	-12	FMC1
chr9	132805438	132805711	-101	FNBP1
chr11	47788835	47789135	45	FNBP4
chr8	42911411	42911669	98	FNTA
chr9	20683956	20684272	635	FOCAD-AS1
chr16	15982240	15982697	38	FOPNL
chr19	45970700	45971036	-385	FOSB
chr7	4681275	4681630	-40478	FOXK1
chr17	80455081	80455320	-22394	FOXK2
chr3	71632712	71632935	81	FOXP1
chr20	29611491	29611718	-236	FRG1BP
chr19	4304450	4304727	-3	FSD1
chrX	73512297	73512586	968	FTX
chr10	75531837	75532169	-46	FUT11
chr14	65879176	65879611	-55	FUT8
chr9	71650737	71651092	435	FXN
chr17	7518105	7518771	-223	FXR2
chr3	197476632	197476853	118	FYTTD1
chr19	3505950	3506310	-165	FZR1
chr17	78075100	78075455	-48	GAA
chr15	50647493	50647813	-27	GABPB1
chr5	160973595	160973866	1400	GABRB2
chr18	8705001	8705269	2484	GACAT2
chr4	926064	926321	-14	GAK
chr17	73761145	73761420	-2	GALK1
chr11	11642592	11642912	809	GALNT18
chr9	128023933	128024229	8	GAPVD1
chr18	30050715	30051031	-426	GAREM1
chr8	103822841	103823217	3979	GASAL1
chr19	19516405	19516664	19922	GATAD2A
chr21	45553239	45553666	-42	GATD3A
chr15	45694376	45694655	0	GATM
chr10	104005132	104005355	-12	GBF1
chr15	41055396	41055630	-772	GCHFR
chr20	34042445	34042927	-118	GDF5
chr17	57297655	57297973	-14	GDPD1
chr14	39583334	39583611	-16	GEMIN2
chr2	17934957	17935446	76	GEN1
chr16	67753096	67753506	-28	GFOD2
chr2	69614340	69614689	-128	GFPT1
chr6	149887200	149887441	-24	GINM1
chr17	27916600	27916823	-101	GIT1
chr9	6681284	6681600	-35750	GLDC
chr9	131266791	131267041	-55	GLE1
chr6	38670934	38671159	-94	GLO1
chr10	131934462	131934705	-56	GLRX3
chr2	70056523	70056915	-19	GMCL1
chr6	24774957	24775221	-70	GMNN
chr22	19842272	19842648	2	GNB1L
chr17	47269979	47270254	16627	GNGT2
chr4	44728456	44728824	11	GNPDA2
chr14	53258193	53258420	80	GNPNAT1
chr12	102224689	102225015	-207	GNPTAB
chr9	127703247	127703613	-44	GOLGA1
chr3	37284597	37284835	34	GOLGA4
chr15	34875818	34876045	-160	GOLGA8B
chr6	117923495	117923896	10	GOPC
chr8	41435596	41435867	24	GPAT4
chr2	37311464	37311743	9	GPATCH11
chr17	42580723	42581080	69	GPATCH8
chr5	56469023	56469538	-495	GPBP1
chr1	46152164	46152975	-267	GPBP1L1
chr3	32147869	32148104	-17	GPD1L
chr19	34850021	34850536	-5367	GPI
chr11	64053154	64053492	-259	GPR137
chr7	1094795	1095134	53	GPR146
chr12	12849037	12849270	-32	GPR19
chr12	12849529	12849744	-515	GPR19
chr14	91790353	91790668	-70286	GPR68
chr12	13080323	13080746	-126	GPRC5D-AS1
chr1	109419478	109419709	-10	GPSM2
chr17	73401754	73402053	-113	GRB2
chr17	37910659	37910937	14578	GRB7
chr9	37422489	37422791	-67	GRHPR
chr9	140024077	140024378	-9382	GRIN1
chr10	120966871	120967109	-207	GRK5
chr4	71705545	71705762	-26	GRSF1
chr3	119814476	119814705	-1326	GSK3B
chr14	81687176	81687524	-54	GTF2A1
chr19	6393472	6394129	-509	GTF2F1
chr13	27998496	27998897	15	GTF3A
chr16	27561059	27561449	-3	GTF3C1
chr7	89975792	89976043	-62	GTPBP10
chr22	46692475	46692820	9	GTSE1
chr11	76092147	76092516	-16	GVQW3
chr12	42538414	42538906	13	GXYLT1
chr3	148709266	148709493	184	GYG1
chr20	23342406	23342875	-129	GZF1
chr15	65822658	65822933	-32	HACD3
chr17	3626954	3627281	-80	HASPIN
chr19	36103497	36103753	-21	HAUS5
chr19	17185847	17186221	309	HAUS8
chr1	154244986	154245295	101	HAX1
chr11	5246520	5246757	1663	HBB
chr6	135375787	135376187	49	HBS1L
chr2	47748214	47748573	-6283	HCG2040054
chr17	40336135	40336418	1194	HCRT
chr6	114292370	114292696	-174	HDAC2
chr5	141016309	141016585	-24	HDAC3
chr18	44676424	44676694	312	HDHD2
chr9	116139100	116139428	25	HDHD3
chr2	242254989	242255318	104	HDLBP
chr16	50099719	50100437	226	HEATR3
chr10	69835055	69835368	-108	HERC4
chr17	43225601	43225933	1083	HEXIM1
chr17	79650870	79651104	25	HGS
chr7	128095709	128096000	-30	HILPDA
chr11	118991829	118992243	-197	HINFP
chr5	130500771	130501211	50	HINT1
chr16	30006894	30007182	379	HIRIP3
chr19	37808401	37808756	-206	HKR1
chr21	38362388	38362612	194	HLCS
chr20	30102093	30102307	-13	HM13
chr21	40721450	40721685	-520	HMGN1
chr1	26799463	26799714	686	HMGN2
chr5	137089975	137090210	-53	HNRNPA0
chr12	54674822	54675111	433	HNRNPA1P10
chr4	83205999	83206218	89041	HNRNPD
chr5	179050537	179051014	-53	HNRNPH1
chr10	70091563	70091893	-40	HNRNPH3
chr19	39339862	39340343	515	HNRNPL
chr19	8509663	8509933	-5	HNRNPM
chr1	245027773	245028046	-82	HNRNPU
chr11	62494697	62495266	-124	HNRNPUL2
chr12	54411651	54411907	1143	HOXC5
chr1	21113127	21113534	-149	HP1BP3
chr22	26879630	26879846	91	HPS4
chr11	535508	535757	-65	HRAS
chr12	117295878	117296178	23204	HRK
chr16	1979647	1979969	-11484	HS3ST6
chr5	118788276	118788516	204	HSD17B4
chr14	102553406	102553766	-74	HSP90AA1
chr10	14880009	14880337	14	HSPA14
chr11	122933039	122933296	-124	HSPA8
chr5	137911330	137911592	-143	HSPA9
chr1	54411815	54412139	4	HSPB11
chr2	198364559	198365435	1	HSPD1
chr4	3076229	3076496	-46	HTT
chr11	125757385	125757705	590	HYLS1
chr1	228353125	228353911	9	IBA57
chr1	6295910	6296232	-27	ICMT
chr10	94333674	94334000	15	IDE
chr15	78441553	78441814	-36	IDH3A
chr21	34696810	34697473	-73	IFNAR1
chr3	160117101	160117509	15	IFT80
chr15	81586074	81586308	-3063	IL16
chr19	15236457	15236738	13	ILVBL
chr7	111202335	111202730	41	IMMP2L
chr2	86422480	86422804	251	IMMT
chr11	61880002	61880283	-11303	INCENP
chr13	111365157	111365537	-263	ING1
chr18	33077462	33077849	-42	INO80C
chr7	155089352	155089566	-23	INSIG1
chr2	118845870	118846148	15	INSIG2
chr8	19674657	19674958	147	INTS10
chr1	1259926	1260177	16	INTS11
chr12	27090752	27091133	312	INTS13
chr17	60005237	60005581	-16	INTS2
chr11	62420650	62420887	6	INTS5
chr3	49824045	49824299	-199	IP6K1
chr3	48754605	48754902	-42	IP6K2
chr5	61708285	61708616	-123	IPO11
chr1	201798076	201798403	-49	IPO9
chr1	46216276	46216621	37	IPP
chr1	32671032	32671372	-34	IQCC
chr7	2598439	2598771	-1	IQCE
chr15	67813278	67813579	-28	IQCH-AS1
chr14	77495074	77495317	-153	IRF2BPL
chr19	50169054	50169416	-103	IRF3
chr12	108956236	108956563	1160	ISCU
chr5	52095695	52096085	11754	ITGA1
chr19	2096564	2096934	-119	IZUMO4
chr1	227922911	227923312	1	JMJD4
chr19	12904262	12904506	2074	JUNB
chr19	18391089	18391495	1174	JUND
chr2	211035403	211035646	570	KANSL1L
chr10	102820622	102820859	-259	KAZALD1
chr19	50828884	50829171	3607	KCNC3
chr19	50836937	50837254	-323	KCNC3
chr7	150671796	150672044	3482	KCNH2
chr10	103590601	103590876	8873	KCNIP2
chr2	47797075	47797374	246	KCNK12
chr19	18058526	18059311	-3193	KCNN1
chr16	29937399	29937745	-19	KCTD13
chr11	77850627	77850969	-41	KCTD21-AS1
chr7	66093808	66094049	60	KCTD7
chr11	66886311	66886764	-203	KDM2A
chr2	86667740	86668031	-386	KDM3A
chr9	6757869	6758245	707	KDM4C
chr17	7738983	7739210	-4128	KDM6B
chr16	27214941	27215430	-111	KDM8
chr19	10613318	10613629	8	KEAP1
chr1	32479103	32479599	56	KHDRBS1
chr17	26972028	26972358	-16	KIAA0100
chr16	85061194	85061464	-28	KIAA0513
chr4	123073335	123073606	-18288	KIAA1109
chr9	6008423	6008800	-608	KIAA2026
chr10	94351312	94351679	-1330	KIF11
chr16	29801724	29802083	-131	KIF22
chr9	86536339	86536659	-40	KIF27
chr5	61601811	61602139	-14	KIF2A
chr5	132073172	132073512	-72	KIF3A
chrX	69509752	69509990	-8	KIF4A
chr1	170043696	170044063	0	KIFAP3
chr15	31618685	31619093	-169	KLF13
chr13	73632833	73633063	18	KLF5
chr22	20850056	20850340	-28	KLHL22
chr7	23145264	23145512	35	KLHL7
chr7	104653964	104654242	485	KMT2E-AS1
chr15	40886277	40886523	-47	KNL1
chr19	10676417	10676775	106	KRI1
chr1	155145608	155146455	-227	KRTCAP2
chr17	37026066	37026331	86	LASP1
chr11	18417611	18418029	7	LDHA
chr4	109094325	109094691	1232	LEF1-AS1
chr10	126150209	126150548	37	LHPP
chr9	126783337	126783560	9559	LHX2
chr13	108867840	108868084	-80	LIG4
chr12	50677277	50677510	-40	LIMA1
chr19	49617515	49617778	28	LIN7B
chr6	33560935	33561270	13	LINC00336
chr13	30689139	30689364	-6239	LINC00365
chr1	211555957	211556301	32	LINC00467
chr2	232379065	232379413	-189	LINC00471
chr14	105282213	105282593	-5135	LINC00638
chr14	51813950	51814220	13974	LINC00640
chr19	28285236	28285477	-508	LINC00662
chr3	156806798	156807188	-677	LINC00881
chr16	3314385	3314629	739	LINC00921
chr9	132175979	132176414	-74743	LINC00963
chr9	66458356	66458679	1228	LINC01410
chr20	23338910	23339181	-281	LINC01431
chr19	52097506	52097848	-44	LINC01530
chrX	47341877	47342115	-119	LINC01560
chr22	23863958	23864175	-34899	LINC01658
chr1	4370444	4370814	-101482	LINC01777
chr2	70369751	70370113	-17484	LINC01816
chr4	158491614	158491857	-1907	LINC02433
chr4	6675461	6675858	-51	LINC02482
chr15	101142263	101142617	5	LINS1
chr5	137368256	137368608	-31	LOC100130172
chr11	67085113	67085448	-30	LOC100130987
chr17	37213107	37213417	-10	LOC100131347
chr9	66493990	66494400	-25	LOC100132249
chr9	99638043	99638313	6996	LOC100132781
chr7	76178442	76178813	-31	LOC100133091
chr11	74204174	74204608	-39	LOC100287896
chr5	98264655	98265061	20	LOC100289230
chr1	9488786	9489139	13	LOC100506022
chr1	173445861	173446170	279	LOC100506023
chr9	131486408	131486890	-92	LOC100506100
chr2	118943840	118944212	-64	LOC100506797
chr12	69080469	69080821	-6	LOC100507250
chr7	66119321	66119607	-42	LOC100996437
chr7	54826863	54827107	-21	LOC100996654
chr20	25843802	25844123	-9305	LOC101926935
chr7	1199911	1200233	62	LOC101927021
chr19	27732017	27732257	-552202	LOC101927151
chr10	106065731	106065956	-17279	LOC101927472
chr17	55706878	55707119	-21225	LOC101927539
chr7	107383977	107384731	149	LOC101927974
chr18	74204770	74205056	1305	LOC101927989
chr1	245134070	245134303	-15	LOC101928068
chr14	71108001	71108237	-104	LOC101928075
chr2	240322858	240323567	82	LOC101928111
chr11	102323351	102323624	-163	LOC101928424
chr1	117601973	117602222	15	LOC101929099
chr6	34642671	34642892	-21150	LOC101929243
chr6	34664578	34664815	-26	LOC101929243
chr6	169613078	169613376	-80	LOC101929523
chr4	120133675	120133943	-10	LOC101929762
chr7	148985	149737	77	LOC102723672
chr1	174128354	174128587	-45	LOC102724601
chr17	25286018	25286375	130071	LOC105371703
chr17	48619216	48619752	-3369	LOC105371824
chr1	229406736	229407049	9	LOC105373159
chr4	26859150	26859459	2562	LOC105374546
chr9	86323119	86323350	-12	LOC105376114
chr3	72787897	72788116	-74606	LOC105377162
chr1	1976386	1976641	4996	LOC105378591
chr1	39338930	39339256	20	LOC105378663
chr9	45441773	45441988	-5	LOC107984035
chr9	45356920	45357231	-84810	LOC107984035
chr3	197354779	197355012	-143	LOC220729
chr11	58826044	58826327	-260	LOC283194
chr18	77439082	77439305	552	LOC284241
chr4	184425708	184426052	-212	LOC389247
chr10	124638933	124639320	-23	LOC399815
chr10	42400337	42400638	463006	LOC441666
chr12	9436110	9436367	-15	LOC642846
chr21	46707755	46708077	-51	LOC642852
chr7	150102290	150102512	-439	LOC728743
chr16	30709324	30710531	-117	LOC730183
chr14	96968509	96968857	-20	LOC730202
chr1	211854118	211854443	5176	LOC91548
chr11	58345767	58346456	-399	LPXN
chr4	151936720	151937038	-230	LRBA
chr3	197517942	197518267	7	LRCH3
chr19	36422258	36422659	-5564	LRFN3
chr1	111506493	111506764	-62	LRIF1
chr19	33667724	33668048	-17713	LRP3
chr1	53791823	53792086	1867	LRP8
chr4	3534074	3534509	-67	LRPAP1
chr8	145752294	145752626	-44	LRRC24
chr10	134148591	134148825	-1903	LRRC27
chr17	79980996	79981241	-60	LRRC45
chr3	120068158	120068383	-84	LRRC58
chr8	38034183	38034471	-79	LSM1
chr17	42143580	42143828	1283	LSM12
chr19	34625299	34625543	-37931	LSM14A
chr20	60697165	60697549	-160	LSM14B
chr19	18433941	18434305	-122	LSM4
chr21	47648621	47648916	-30	LSS
chr16	279031	279294	319	LUC7L
chr7	139044869	139045162	423	LUC7L2
chr7	135662062	135662338	4	LUZP6
chr8	55014480	55014822	-74	LYPLA1
chr1	219347029	219347286	-16	LYPLAL1
chr5	89825404	89825688	-145	LYSMD3
chr4	120987899	120988167	-20	MAD2L1
chr17	79885542	79885884	8	MAFG-DT
chrX	54835191	54835437	-179	MAGED2
chr11	64739485	64739704	-31	MAJIN
chr19	49217584	49217905	2470	MAMSTR
chr6	119670919	119671206	-131	MAN1A1
chr9	139981106	139981539	-53	MAN1B1-DT
chr2	210288584	210288834	-62	MAP2
chr19	4124076	4124371	-97	MAP2K2
chr19	7968358	7968889	-42	MAP2K7
chr15	52311227	52311451	-72	MAPK6
chr9	128469430	128469783	-93	MAPKAP1
chr2	198569882	198570206	16	MARS2
chr1	46269023	46269360	-88	MAST2
chr19	18208522	18208754	35	MAST3
chr5	138629174	138629464	-14	MATR3
chr20	3827238	3827564	-45	MAVS
chr18	47807827	47808392	28	MBD1
chr18	51750885	51751121	155	MBD2
chr19	1592214	1592488	409	MBD3
chr19	1592860	1593221	-280	MBD3
chr3	129158844	129159147	27	MBD4
chr12	57916504	57916811	-2	MBD6
chr3	182833791	182834141	-16591	MCCC1
chr6	119256120	119256339	98	MCM9
chr10	121632372	121632683	-132	MCMBP
chr19	7587293	7587546	-77	MCOLN1
chr8	6263969	6264254	-2	MCPH1
chr8	6565608	6565833	10	MCPH1-AS1
chr17	79791096	79791368	-62	MCRIP1
chr12	49961464	49961900	246	MCRS1
chr1	37980258	37980558	12	MEAF6
chr19	16739019	16739273	-131	MED26
chr13	48669092	48669442	10	MED4
chr15	100106006	100106252	-4	MEF2A
chr19	42829366	42829744	-206	MEGF8
chr10	15001130	15001399	-90	MEIG1
chr9	36487845	36488100	-84887	MELK
chr7	100025786	100026136	-452	MEPCE
chr7	100026799	100027507	-101	MEPCE
chr15	81282062	81282352	12	MESD
chr15	90293986	90294326	384	MESP1
chr11	28129675	28129987	33	METTL15
chr16	8715318	8715684	4	METTL22
chr17	74723260	74723492	464	METTL23
chr15	82339245	82339579	-928	MEX3B
chr17	74733401	74734075	155	MFSD11
chr6	111580408	111580678	61	MFSD4B
chr15	41952462	41953057	149	MGA
chr20	62258442	62258772	19	MHENCR
chr18	19320589	19320905	-543	MIB1
chr1	1550593	1551203	103	MIB2
chr22	39898129	39898383	21	MIEF1
chr22	24236954	24237287	555	MIF
chr9	131798764	131799042	113	MIGA2
chr17	4736410	4736760	-50	MINK1
chr19	14184085	14184319	29	MIR1199
chr7	129419972	129420216	-5240	MIR183
chr11	61582596	61582938	-55	MIR1908
chr15	93447454	93447744	-30	MIR3175
chr16	2581883	2582160	-15	MIR3178
chr16	2582927	2583153	-1034	MIR3178
chr9	68413063	68413374	-2090	MIR4477B
chr11	65420326	65420642	3821	MIR4489
chr17	27717082	27717423	-428	MIR4523
chr1	228652374	228652641	2732	MIR4666A
chr19	58898067	58898618	-117	MIR4754
chr2	19547689	19548261	-215	MIR4757
chr1	10020837	10021075	-6483	MIR5697
chr19	45954018	45954266	14230	MIR6088
chr11	65222510	65222810	10731	MIR612
chr14	100751631	100752009	8126	MIR6764
chr3	127293776	127294024	274	MIR6825
chr19	35615355	35615732	1939	MIR6887
chr18	111753	111989	468	MIR8078
chr21	33651208	33651675	-65	MIS18A
chr16	14164736	14165162	-221	MKL2
chr1	47069856	47070156	-33	MKNK1
chr19	2051195	2051618	-163	MKNK2
chr19	2061376	2061610	-10250	MKNK2
chr7	140179165	140179464	55	MKRN1
chr14	75518041	75518431	-1	MLH3
chr9	20622410	20622637	19	MLLT3
chr16	2255480	2255946	-13	MLST8
chr17	40718877	40719153	-63	MLX
chr4	146540347	146540679	-27	MMAA
chr1	2574477	2574770	-10142	MMEL1
chr10	99258065	99258570	49	MMS19
chr17	2297044	2297269	7102	MNT
chr2	198380598	198380861	-38	MOB4
chr5	52405472	52405793	-30	MOCS2
chr14	102771301	102771758	8	MOK
chr22	31318111	31318410	-35	MORC2-AS1
chr21	37692198	37692428	-174	MORC3
chr15	79164997	79165316	33	MORF4L1
chr1	2322961	2323237	91	MORN1
chr12	122124759	122125055	-17347	MORN3
chr1	167905233	167905584	31	MPC2
chr16	82203698	82204002	-21	MPHOSPH6
chr12	123717609	123717969	-4	MPHOSPH9
chr7	24612786	24613002	-71	MPP6
chr4	6642107	6642449	460	MRFAP1
chr20	61427602	61427836	-38	MRGBP
chr17	35078629	35078844	120711	MRM1
chr5	179285731	179286073	-62	MRNIP
chr6	44094999	44095386	36	MRPL14
chr11	6704472	6704860	-34	MRPL17
chr1	156710955	156711288	-198	MRPL24
chr7	42971675	42972080	-62	MRPL32
chr19	17416347	17416633	13	MRPL34
chr5	1799897	1800179	-82	MRPL36
chr22	19419785	19420103	-83	MRPL40
chr11	64889576	64889926	35	MRPL49
chr19	3762720	3763268	329	MRPL54
chr19	39421005	39421288	-202	MRPS12
chr6	43692797	43693133	-37416	MRPS18A
chr4	84376915	84377241	-7	MRPS18C
chr3	15106683	15106985	10	MRPS25
chr7	140714733	140715020	-95	MRPS33
chr6	24402981	24403298	3	MRS2
chr2	47629915	47630274	-112	MSH2
chr2	47922470	47922733	-87620	MSH6
chr17	38279568	38279801	894	MSL1
chr3	135914999	135915586	-604	MSL2
chr8	9912022	9912428	446	MSRA
chr1	16971067	16971436	-818	MST1P2
chr11	47664039	47664465	-46	MTCH2
chr15	65321806	65322174	-13	MTFMT
chr10	135207387	135207805	-25	MTG1
chr14	64854834	64855146	231	MTHFD1
chr13	28024135	28024376	71	MTIF3
chr3	195474705	195474986	27092	MUC20
chr5	176739366	176739690	-236	MXD3
chr20	42286000	42286289	-9515	MYBL2
chr13	77901132	77901389	-83	MYCBP2
chr13	77903194	77903618	-2229	MYCBP2
chr17	8534562	8534879	-641	MYH10
chr15	72410351	72410713	-92	MYO9A
chr5	150036265	150036505	-4018	MYOZ3
chr19	46405904	46406365	-272	MYPOP
chr16	48643997	48644285	-21	N4BP1
chr5	177548124	177548686	7849	N4BP3
chr21	30257475	30257965	-25	N6AMT1
chr13	41885174	41885550	21	NAA16
chr12	112546455	112546791	12	NAA25
chr11	63706246	63706560	-39	NAA40
chr16	66864790	66865054	-43	NAE1
chr2	71295234	71295878	148	NAGK
chr7	105925474	105925787	8	NAMPT
chr19	46430929	46431220	-13038	NANOS2
chr20	25604458	25604834	2	NANP
chr12	76478240	76478508	439	NAP1L1
chr20	23401983	23402395	-33	NAPB
chr18	10525680	10526045	-11	NAPG
chr17	80415872	80416466	109	NARF
chr16	790910	791144	11	NARFL
chr17	72772352	72772740	18	NAT9
chr1	16939878	16940254	34	NBPF1
chr1	21766434	21766774	21	NBPF3
chr3	196669297	196669548	42	NCBP2
chr20	44718183	44718595	191	NCOA5
chr17	8338856	8339293	-96	NDEL1
chr19	5903714	5904011	162	NDUFA11
chr12	95397441	95397746	-104	NDUFA12
chr9	124921862	124922268	33	NDUFA8
chr6	97345610	97345909	8	NDUFAF4
chr20	13765515	13765839	5	NDUFAF5
chr19	14682557	14682839	191	NDUFB7
chr5	1801290	1801673	-15	NDUFS6
chr21	44313203	44313474	-40	NDUFV3
chr8	11626947	11627205	-58	NEIL2
chr4	178230849	178231137	2	NEIL3
chr3	52804848	52805151	-34	NEK4
chr9	140149533	140149788	-92	NELFB
chr20	57556177	57556465	58	NELFCD
chr17	29421714	29422056	-60	NF1
chr2	69664479	69664693	174	NFU1
chr9	33290295	33290597	31	NFX1
chr4	47916598	47916915	-72	NFXL1
chr2	122407047	122407385	-14	NIFK-AS1
chr15	23034296	23034611	-26	NIPA2
chr3	42641917	42642145	-116	NKTR
chr16	57037426	57037671	-13438	NLRC5
chr17	49230804	49231038	1	NME1
chr9	77703027	77703371	41	NMRK1
chr16	69788699	69789130	-43	NOB1
chr6	13615332	13615864	39	NOL7
chr5	170814411	170814822	-92	NPM1
chr8	21867691	21867942	-13805	NPM2
chr3	50388127	50388544	151	NPRL2
chr16	188598	188918	-61	NPRL3
chr17	38256803	38257039	57	NR1D1
chr3	23987477	23987713	-17	NR1D2
chr12	95467263	95467539	3	NR2C1
chr1	199998078	199998442	1530	NR5A2
chr2	27651912	27652141	607	NRBP1
chr19	5827847	5828298	4259	NRTN
chr15	29561916	29562226	-51	NSMCE3
chr17	73127868	73128091	-89	NT5C
chr7	33102255	33102918	-153	NT5C3A
chr5	162886960	162887366	-3	NUDCD2
chr13	48611896	48612201	345	NUDT15
chr16	77756357	77756593	86	NUDT7
chr13	45492055	45492414	71379	NUFIP1
chr9	134000677	134000986	-117	NUP214
chr22	45559548	45559950	23	NUP50
chr19	50432608	50433100	-55	NUP62
chr11	62572884	62573215	-85	NXF1
chr6	41040187	41040717	-99	OARD1
chr10	126077752	126078086	29626	OAT
chr19	2273582	2273904	4258	OAZ1
chr15	64995451	64995716	-103	OAZ2
chr19	17337179	17337440	296	OCEL1
chr4	48832764	48833080	-138	OCIAD1
chr10	103578133	103578522	-105	OGA
chr1	59012338	59012553	26	OMA1
chr3	193310733	193311080	-27	OPA1
chr11	69490065	69490326	-30	ORAOV1
chr16	46723323	46723586	-104	ORC6
chr2	190648950	190649339	-47	ORMDL1
chr12	58087440	58087660	-188	OS9
chr7	25019727	25019963	-14	OSBPL3
chr20	42839378	42839691	12	OSER1
chr8	92082262	92082541	16	OTUD6B-AS1
chr5	14664568	14664889	-26	OTULIN
chr10	74856699	74856956	-95	P4HA1
chr6	34433695	34433917	-32	PACSIN1
chr16	29827130	29827632	-147	PAGR1
chr4	57302068	57302415	-28	PAICS
chr5	138677898	138678260	-44	PAIP2
chr16	4401193	4401562	23	PAM16
chr14	97058940	97059209	89872	PAPOLA
chr4	108641270	108641765	-98	PAPSS1
chr6	52226669	52226972	-106	PAQR8
chr20	49347432	49348053	-339	PARD6B
chr1	8021571	8021872	7	PARK7
chr16	14723992	14724302	-19	PARN
chr13	25086868	25087116	-44	PARP4
chr15	72564897	72565239	-152	PARP6
chr2	242089651	242089946	-404	PASK
chr11	59436342	59436804	-62	PATL1
chr22	31741744	31742111	322	PATZ1
chr9	37002511	37002756	31843	PAX5
chr7	154794977	154795310	0	PAXIP1-AS1
chr2	70314071	70314343	-60	PCBP1-AS1
chr3	135968988	135969352	3	PCCB
chr2	74734457	74734778	204	PCGF1
chr10	105110784	105111078	-40	PCGF6
chr20	44563002	44564030	199	PCIF1
chr7	82792152	82792460	-109	PCLO
chr20	62886888	62887210	1	PCMTD2
chr20	5100583	5100844	-66	PCNA
chr11	65382952	65383378	-618	PCNX3
chr19	34895085	34895474	-24	PDCD2L
chr19	33071849	33072228	-56	PDCD5
chr3	33839945	33840184	1	PDCD6IP
chr2	101179254	101179835	126	PDCL3
chr7	148725639	148725894	16	PDIA4
chr20	30539651	30540078	19	PDRG1
chr16	15068357	15068749	-39	PDXDC1
chr16	70100007	70100393	-349	PDXDC2P-NPIPB14P
chr7	94287771	94288048	2272	PEG10
chr17	8054472	8054686	1174	PER1
chr2	239197668	239197910	-582	PER2
chr7	92157740	92158006	-28	PEX1
chr1	2344045	2344521	-273	PEX10
chr11	45939559	45939827	-19	PEX16
chr5	139682598	139682865	-42	PFDN1
chr3	48594303	48594758	-174	PFKFB4
chr17	4852159	4852427	88	PFN1
chr10	99185772	99186105	56	PGAM1
chr1	249200334	249200637	43	PGBD2
chr19	17622267	17622547	-25	PGLS
chr11	74109688	74109949	-308	PGM2L1
chr16	2264922	2265263	-270	PGP
chr4	129209173	129209541	627	PGRMC2
chr1	28695908	28696174	-24	PHACTR4
chr3	169899161	169899747	83	PHC3
chr17	27278356	27279028	-184	PHF12
chr7	11013254	11013636	-54	PHF14
chr20	34359640	34359858	-174	PHF20
chr17	7142856	7143163	-184	PHF23
chr6	64345505	64345775	-67	PHF3
chr5	177659325	177659547	387	PHYKPL
chr10	99400069	99400385	-216	PI4K2A
chr4	25235438	25235700	-84	PI4K2B
chr19	4007339	4007791	-31	PIAS4
chr15	65116067	65116380	1644	PIF1
chr2	46844025	46844372	53	PIGF
chr14	68066896	68067182	-22	PIGH
chr1	27114309	27114591	-4	PIGV
chr1	9712044	9712335	400	PIK3CD
chr22	50353944	50354172	-85	PIM3
chr1	20959759	20960098	-20	PINK1
chr1	151170829	151171205	-3	PIP5K1A
chr22	32072803	32073064	-14383	PISD
chr1	24104675	24105118	20	PITHD1
chr5	137224982	137225204	-32	PKD2L2
chr16	3030457	3030759	-68	PKMYT1
chr4	110651074	110651317	47	PLA2G12A
chr12	120755260	120755529	10198	PLA2G1B
chr19	48613628	48613879	356	PLA2G4C
chr7	30067801	30068158	2	PLEKHA8
chr2	131862694	131862996	425	PLEKHB2
chr19	2236268	2236893	-228	PLEKHJ1
chr16	23689964	23690248	13	PLK1
chr4	128801854	128802205	13	PLK4
chr3	142315072	142315380	-3	PLS1
chr3	146262221	146262502	267	PLSCR1
chr19	17501923	17502161	-13884	PLVAP
chr7	99933844	99934134	-59	PMS2P1
chr19	46999016	46999343	-10	PNMA8B
chr14	39643860	39644114	-400	PNN
chr2	68384839	68385151	33	PNO1
chr8	28196790	28197058	759	PNOC
chr6	89790189	89790453	-108	PNRC1
chr11	65029073	65029488	-43	POLA2
chr19	50887267	50888011	59	POLD1
chr2	75185570	75185919	-26	POLE4
chr18	51795691	51795948	-30	POLI
chr4	2243760	2244090	-34	POLN
chr2	86332821	86333168	284	POLR1A
chr17	7387974	7388225	401	POLR2A
chr3	184080997	184081304	379	POLR2H
chr7	102119281	102119610	-64	POLR2J
chr7	102311976	102312407	-15	POLR2J2
chr7	102213012	102213265	-70	POLR2J3
chr7	44058680	44059076	-85	POLR2J4
chr12	106751644	106752049	-14	POLR3B
chr22	41940355	41940602	15	POLR3H
chr19	633337	633796	2	POLRMT
chr9	134378128	134378416	-17	POMT1
chr19	30096937	30097292	-56	POP4
chr7	100303528	100303827	1	POP7
chr8	43827073	43827316	679609	POTEA
chr1	167189589	167190039	-252	POU2F1
chr10	71993036	71993382	-19	PPA1
chr19	10216793	10217133	64	PPAN-P2RY11
chr1	42922069	42922391	65	PPCS
chr19	49631135	49631529	8686	PPFIA3
chr10	81107078	81107347	-8	PPIF
chr17	58677286	58677682	-60	PPM1D
chr11	73881931	73882326	20	PPME1
chr2	28974368	28974771	-45	PPP1CB
chr1	202317677	202317891	-46	PPP1R12B
chr14	23770764	23771014	1168	PPP1R3E
chr5	133561709	133562239	-24	PPP2CA
chr14	102226619	102226965	-160	PPP2R5C
chr6	42952183	42952442	75	PPP2R5D
chr2	68478546	68478763	997	PPP3R1
chr19	46850037	46850400	-33	PPP5C
chr9	127951991	127952287	79	PPP6C
chr19	55769932	55770706	-281	PPP6R1
chr12	111021093	111021431	-198	PPTC7
chr8	70907005	70907234	76443	PRDM14
chr12	108154860	108155180	-106	PRDM4
chr10	120937994	120938244	258	PRDX3
chr11	64085396	64085723	-1	PRDX5
chr2	27357309	27357759	9	PREB
chr20	57617820	57618259	-138	PRELID3B
chr20	57629476	57629699	-11686	PRELID3B
chr12	57146031	57146290	-14	PRIM1
chr8	48872588	48872843	28	PRKDC
chr21	48055277	48055745	4	PRMT2
chr4	148605239	148605504	10	PRMT9
chr2	128145544	128145816	-30316	PROC
chr14	45553122	45553493	5	PRPF39
chr17	62075513	62075803	-53	PRR29
chr5	176882229	176882567	7072	PRR7
chr19	36236277	36236554	-63	PSENEN
chr15	78832606	78832941	26	PSMA4
chr19	40476716	40477065	-22	PSMC4
chr20	1099062	1099332	-39	PSMF1
chr13	20357044	20357293	8	PSPC1
chr10	124739759	124740011	329	PSTK
chr19	797773	798082	535	PTBP1
chr9	115110703	115110964	-14889	PTBP3
chr8	142011373	142011718	-133	PTK2
chr2	232572891	232573209	-185	PTMA
chr2	232526755	232527268	-46224	PTMA
chr9	131873457	131873767	19	PTPA
chr18	12883776	12884377	258	PTPN2
chr3	47422267	47422512	-83	PTPN23
chr2	120517160	120517454	100	PTPN4
chr11	112097010	112097228	31	PTS
chr21	46293581	46294054	1	PTTG1IP
chrX	7066098	7066874	-255	PUDP
chr1	31538593	31538915	-190	PUM1
chr2	20550552	20550929	5	PUM2
chr8	30891081	30891364	9	PURG
chr11	125772969	125773264	0	PUS3
chr1	1243761	1244094	-33	PUSL1
chr12	108079419	108079714	57	PWP1
chr20	32307857	32308076	170	PXMP4
chr19	10806426	10806708	-5545	QTRT1
chr2	26256565	26256989	48	RAB10
chr9	123964176	123964528	13	RAB14
chr10	27792867	27793374	17	RAB18
chr2	65357263	65357557	25	RAB1A
chr11	66035801	66036106	-103	RAB1B
chr6	57086978	57087248	-1	RAB23
chr4	140375040	140375389	253	RAB33B
chr12	120554492	120554922	-64	RAB35
chr1	220445710	220445997	-10	RAB3GAP2
chr11	73472091	73472520	-104	RAB6A
chr19	16222083	16222487	-205	RAB8A
chr9	125702964	125703182	-215	RABGAP1
chr14	24740529	24741009	64	RABGGTA
chr1	76251777	76252033	26	RABGGTB
chr1	202858110	202858575	43	RABIF
chr3	9005097	9005410	-94	RAD18
chr8	117886932	117887333	-27	RAD21
chr19	13056404	13056779	-37	RAD23A
chr9	110045309	110045608	-59	RAD23B
chr12	1058772	1059000	2	RAD52
chr18	9475124	9475478	-229	RALBP1
chr20	37101137	37101582	-90	RALGAPB
chr9	136023867	136024105	621	RALGDS
chr19	5978006	5978490	72	RANBP3
chr5	130970788	130971112	-21	RAPGEF6
chr7	44080072	44080317	28	RASA4CP
chr19	10443800	10444484	172	RAVER1
chr7	5085285	5085640	10	RBAK
chr1	33116501	33116951	-23	RBBP4
chrX	16888441	16888696	-34	RBBP7
chr18	20513653	20513941	-42	RBBP8
chr8	94753175	94753476	-101	RBM12B
chr11	66383895	66384510	149	RBM14
chr10	6130732	6131111	-28	RBM17
chr12	114404143	114404383	-87	RBM19
chr11	66445211	66445447	63	RBM4B
chrX	135991391	135991677	-28595	RBMX
chrX	129535782	129536089	12	RBMX2
chr22	41347241	41347481	10	RBX1
chr1	24829171	24829405	-99	RCAN3
chr13	49106601	49107101	541	RCBTB2
chr1	28845070	28845299	439	RCC1
chr8	145743129	145743351	-30	RECQL4
chr11	65430107	65430538	121	RELA
chr5	141016802	141017027	397	RELL2
chr11	73087211	73087526	-37	RELT
chr17	40761354	40761669	-66	RETREG3
chr19	14097273	14097631	19682	RFX1
chr19	14117293	14117701	-363	RFX1
chr19	19303374	19303829	26	RFXANK
chr12	49463774	49464085	-121	RHEBL1
chr8	144450634	144450935	21	RHPN1-AS1
chr5	96518868	96519546	-202	RIOK2
chr3	49726852	49727069	28	RNF123
chr5	158636526	158636771	-85	RNF145
chr2	101924983	101925417	-22	RNF149
chr17	4843176	4843471	20	RNF167
chr3	196230467	196230826	-7	RNF168
chr8	101322361	101322670	-121	RNF19A
chr1	33430307	33430636	-57	RNF19B
chr7	5821133	5821454	68	RNF216
chr7	5013525	5013753	23	RNF216P1
chr20	3996291	3996529	-172	RNF24
chr7	156433119	156433491	-48	RNF32
chr9	36400870	36401438	41	RNF38
chr6	37321631	37321881	8	RNF8
chr11	506737	507381	224	RNH1
chr15	68132401	68132626	-130	RNU6-2
chr19	1021482	1021697	68	RNU6-2
chr18	18691721	18691990	-43	ROCK1
chr5	10441783	10442130	7	ROPN1L-AS1
chr10	104210121	104210455	714	RPARP-AS1
chr2	88990936	88991239	-89	RPIA
chr3	40498610	40498865	-46	RPL14
chr17	37356142	37356432	-249	RPL19
chr5	172386309	172386571	13	RPL26L1
chr19	5689983	5690376	-93	RPL36
chr8	146017742	146018117	-98	RPL8
chr15	69744959	69745189	-85	RPLP1
chr15	69755106	69755375	10081	RPLP1
chr3	128336392	128336724	33161	RPN1
chr3	58292034	58292416	253	RPP14
chr10	92631541	92631828	-25	RPP30
chr10	15138947	15139535	62	RPP38
chr11	17099185	17099439	-92	RPS13
chr19	39926538	39926760	11	RPS16
chr2	55450426	55450743	-8455	RPS27A
chr14	50053003	50053282	-8	RPS29
chr11	67195789	67196044	-19	RPS6KB2
chr20	17663059	17663347	-275	RRBP1
chr21	45209088	45209493	-128	RRP1
chr17	48556079	48556327	42	RSAD1
chr1	114354756	114355285	78	RSBN1
chr16	11945256	11945660	-16	RSL1D1
chr6	159420820	159421038	290	RSPH3
chr3	157827981	157828350	324	RSRC1
chr1	25664622	25664900	-16	RSRP1
chr1	25594306	25594580	-27	RSRP1
chr1	25573807	25574246	-16	RSRP1
chr1	100731555	100731879	3	RTCA
chr10	64028423	64028643	89	RTKN2
chr11	63448684	63449037	-62	RTN3
chr17	41132765	41133108	357	RUNDC1
chr21	36398976	36399316	12577	RUNX1-IT1
chr6	116892502	116892795	118	RWDD1
chr21	30391561	30391852	-14	RWDD2B
chr19	47633870	47634270	-10	SAE1
chr19	5622696	5623249	-34	SAFB2
chr20	35579944	35580406	71	SAMHD1
chr4	174291876	174292211	-50	SAP30
chr9	139964646	139964939	236	SAPCD2
chr8	29940450	29940724	137	SARAF
chr1	109756318	109757101	194	SARS
chr11	65728860	65729202	-129	SART1
chr6	39082784	39083171	-15	SAYSD1
chr7	66460483	66460706	89	SBDS
chr11	10315618	10315899	-4	SBF2
chr11	9779627	9779868	-93	SBF2-AS1
chr12	123849738	123850085	-155	SBNO1
chr12	46384492	46384875	-282	SCAF11
chr15	85176619	85176861	2049	SCAND2P
chr15	77197631	77197983	-9	SCAPER
chr12	6472389	6472646	11873	SCNN1A
chr22	50963808	50964227	16	SCO2
chr8	59465547	59465857	-26	SDCBP
chr5	218121	218611	28	SDHA
chr3	195717032	195717414	-73	SDHAP1
chr3	195384668	195385059	-47	SDHAP2
chr5	1594443	1594862	-6	SDHAP3
chr1	17380564	17380869	-51	SDHB
chr17	75136720	75137101	-95	SEC14L1
chr9	139378057	139378447	-41	SEC16A
chr3	42623290	42623624	63	SEC22C
chr10	121652092	121652317	119	SEC23IP
chr10	75503898	75504131	-117	SEC24C
chr4	119757197	119757523	-9	SEC24D
chr10	12171484	12171827	15	SEC61A2
chr18	12948291	12948624	474	SEH1L
chr2	26568744	26569100	-32	SELENOI
chr22	31503392	31503677	39	SELENOM
chr3	150320836	150321199	-33	SELENOT
chr19	48281781	48282078	100	SELENOW
chr3	185303806	185304103	-77	SENP2
chr4	25162005	25162336	34	SEPSECS
chr19	40931946	40932180	-131	SERTAD1
chr19	40949149	40949368	-753	SERTAD3
chr21	37432697	37433057	-215	SETD4
chr11	65819465	65819842	-163	SF3B2
chr22	31892273	31892554	288	SFI1
chr10	105881577	105881838	-109	SFR1
chr17	48238847	48239100	-4373	SGCA
chr19	2783100	2783468	70	SGTA
chr21	40817629	40817902	-26	SH3BGR
chr2	264677	265053	1	SH3YL1
chr12	57623300	57623586	87	SHMT2
chr3	157815875	157816170	7930	SHOX2
chr6	146285417	146285699	-325	SHPRH
chr3	150480888	150481200	-109	SIAH2
chr5	138533914	138534129	44	SIL1
chr19	16939993	16940362	-21	SIN3B
chr12	31478980	31479285	-11	SINHCAF
chr10	69644764	69645080	-17	SIRT1
chr6	13574511	13574868	-72	SIRT5
chr19	4182498	4182830	-63	SIRT6
chr17	79875930	79876227	-20	SIRT7
chr19	46272485	46272851	-171	SIX5
chr15	34629928	34630374	114	SLC12A6
chr1	113498751	113499025	87	SLC16A1
chr17	79678842	79679117	-287	SLC25A10
chr13	41363433	41363748	43	SLC25A15
chr12	98987110	98987407	-145	SLC25A3
chr1	9599258	9599487	-156	SLC25A33
chr19	59025413	59025646	-2097	SLC27A5
chr22	24190179	24190421	-8590	SLC2A11
chr22	24199827	24200307	27	SLC2A11
chr5	68389596	68389948	-4	SLC30A5
chr6	8435694	8435962	-28	SLC35B3
chr1	67519907	67520278	-12	SLC35D1
chr12	69139708	69139973	-26	SLC35E3
chr10	95653510	95653818	-63	SLC35G1
chr2	196521649	196522014	-21	SLC39A10
chr18	33709183	33709526	3	SLC39A6
chr11	62623337	62623556	-38	SLC3A2
chr5	473244	473515	28	SLC9A3-AS1
chr20	61274144	61274396	473	SLCO4A1
chr10	105726704	105726924	-129	SLK
chr15	59225747	59226358	-177	SLTM
chr16	3661423	3661826	-17	SLX4
chr18	48556349	48556705	-56	SMAD4
chr6	71377281	71377510	-79	SMAP1
chr1	40839155	40839515	-43	SMAP2
chr19	11071215	11071630	-176	SMARCA4
chr22	24128988	24129282	17	SMARCB1
chr3	47823305	47823681	-88	SMARCC1
chr19	44258898	44259371	54	SMG9
chr21	35747480	35747896	-61	SMIM11A
chr4	39640488	39640754	-3	SMIM14
chr9	32550867	32551274	-72	SMIM27
chr3	52570352	52570585	-153	SMIM4
chr19	16771015	16771369	-224	SMIM7
chr1	246670487	246670826	-12	SMYD3
chr17	1733061	1733347	-29	SMYD4
chr16	88729624	88729848	-45	SNAI3-AS1
chr15	42787672	42787996	330	SNAP23
chr10	88699284	88699511	-16161	SNCG
chr14	81636631	81636891	32417	SNORA79
chr16	30429041	30429486	1817	SNORA80C
chr3	43327841	43328190	11	SNRK
chr12	123942931	123943200	414	SNRNP35
chr19	49588379	49588748	166	SNRNP70
chr20	16710386	16710689	-72	SNRPB2
chr2	70520449	70520740	-4	SNRPG
chr22	42062692	42063053	22041	SNU13
chr15	25199924	25200229	6	SNURF
chr14	78227453	78227666	-62	SNW1
chr15	64387924	64388174	-34	SNX1
chrX	70288168	70288410	9	SNX12
chr6	86303511	86303768	235	SNX14
chr16	11349921	11350151	3	SOCS1
chr14	55493730	55493953	-3	SOCS4
chr11	121297956	121298218	-24825	SORL1
chr2	39351311	39351642	-3872	SOS1
chr9	35812035	35812356	64	SPAG8
chr2	32288444	32288802	-57	SPAST
chr1	84971756	84972101	-56	SPATA1
chr16	89768248	89768516	-261	SPATA2L
chr4	177116683	177117003	-21	SPATA4
chr12	49760832	49761189	322	SPATS2
chr19	11266459	11266910	-196	SPC24
chr5	169010460	169010815	-1	SPDL1
chr22	24666577	24667192	99	SPECC1L
chr1	16173890	16174454	-187	SPEN
chr1	16162191	16162746	-11891	SPEN
chr16	89574634	89574883	-38	SPG7
chr19	38754961	38755568	166	SPINT2
chr17	47754748	47755139	582	SPOP
chr19	2328436	2328822	0	SPPL2B
chr12	121342108	121342410	-104	SPPL3
chr1	231473428	231473907	-15	SPRTN
chr13	50510503	50510865	-47	SPRYD7
chr19	41035082	41035359	-1175	SPTBN4
chr9	94877623	94877948	-29	SPTLC1
chr11	18656251	18656474	-342	SPTY2D1
chr20	36034985	36035305	60614	SRC
chr17	36714432	36714762	47586	SRCIN1
chr5	6633226	6633640	-2	SRD5A1
chr17	17739405	17739759	743	SREBF1
chr7	87849238	87849485	38	SRI
chr16	4233868	4234229	58033	SRL
chr14	35451602	35451945	-1	SRP54-AS1
chr6	35888789	35889065	30	SRPK1
chr3	133524439	133524817	21751	SRPRB
chr17	2207048	2207388	-19	SRR
chr1	24969487	24969818	58	SRRM1
chr7	100472590	100472922	55	SRRT
chr17	56084558	56084866	-5	SRSF1
chr1	70686830	70687187	-26	SRSF11
chr6	36561874	36562133	-87	SRSF3
chr1	29507850	29508171	627	SRSF4
chr2	170655151	170655448	-23	SSB
chr19	56015076	56015379	15357	SSC5D
chr12	109251411	109251709	-201	SSH1
chr17	28256714	28257382	10	SSH2
chr9	130679277	130679535	-101	ST6GALNAC4
chr3	136471250	136471615	-187	STAG1
chr19	4328507	4328811	10188	STAP2
chr11	72504651	72504919	-35	STARD10
chr17	37793170	37793423	-37	STARD3
chr2	96873910	96874228	-85	STARD7-AS1
chr4	26862163	26862446	-9	STIM2
chr2	242447936	242448285	0	STK25
chr10	134145181	134145810	-116	STK32C
chr6	36515191	36515421	-13	STK38
chr20	62273405	62273727	10553	STMN3
chr15	74284583	74284815	-10	STOML1
chr4	99064623	99064841	-341	STPG2
chr1	28099504	28099808	-38	STX12
chr9	102668795	102669073	19	STX17
chr12	131323774	131324004	-70	STX2
chr9	130370661	130371055	-3628	STXBP1
chr19	7701785	7702066	-62	STXBP2
chr6	147524672	147524965	-676	STXBP5
chr13	48575280	48575596	24	SUCLA2
chr1	172501900	172502278	-169	SUCO
chr10	104263642	104263875	39	SUFU
chr7	56131738	56132119	11	SUMF2
chr21	46237955	46238175	-21	SUMO3
chr17	56429609	56429971	-191	SUPT4H1
chr1	43282891	43283193	17	SVBP
chr9	131038313	131038652	57	SWI5
chr10	135379027	135379367	-59	SYCE1
chr19	13029979	13030390	-98	SYCE2
chr1	25566143	25566761	-7439	SYF2
chr19	46366250	46366622	112	SYMPK
chr7	105752925	105753265	-2	SYPL1
chr7	105698413	105698636	54267	SYPL1
chr20	43991584	43991922	13	SYS1
chr1	16693540	16693833	161	SZRD1
chr1	28969535	28969765	-46	TAF12
chr2	9983376	9983903	68	TAF1B
chr6	42018104	42018322	-38	TAF8
chr16	29984790	29985159	-214	TAOK2
chr1	234614768	234615073	-71	TARBP1
chr16	71598701	71599059	-39	TAT-AS1
chr16	30381691	30381956	-301	TBC1D10B
chr9	131549495	131549724	123	TBC1D13
chr4	6911391	6911678	39	TBC1D14
chr16	2524942	2525204	-74	TBC1D24
chr3	17784075	17784494	-53	TBC1D5
chr6	13328639	13329010	-9	TBC1D7
chr5	77072023	77072361	-7	TBCA
chr19	36605686	36606269	89	TBCB
chr3	186285013	186285331	-29	TBCCD1
chr12	64845664	64846012	-2	TBK1
chr3	44379453	44380366	-35	TCAIM
chr16	89939784	89940130	-37	TCF25
chr18	53090482	53090801	-918	TCF4
chr3	49449326	49449867	-43	TCTA
chr3	196045004	196045351	-12	TCTEX1D2
chr12	104359759	104360101	337	TDG
chr14	90422118	90422398	12	TDP1
chr6	24666975	24667375	-60	TDP2
chr9	100174149	100174387	-34	TDRD7
chr19	14640504	14640785	265	TECR
chr22	41799706	41800017	21928	TEF
chr16	1543206	1543465	-17	TELO2
chr5	6712980	6713538	-1459	TENT4A
chr16	75681493	75681800	11	TERF2IP
chr3	51705077	51705363	29	TEX264
chr6	10404244	10404841	-193	TFAP2A-AS2
chr13	114238668	114238965	-187	TFDP1
chr6	41701936	41702223	60	TFEB
chr3	100428046	100428371	33	TFG
chr13	95248394	95248757	-46	TGDS
chr18	3451427	3451743	182	TGIF1
chr16	67875810	67876107	-255	THAP11
chr22	21355888	21356534	0	THAP7-AS1
chr5	175395129	175395356	76	THOC3
chr19	2785215	2785601	-50	THOP1
chr2	70475722	70476111	9	TIA1
chr2	233415146	233415497	-21	TIGD1
chr5	149380086	149380368	-56	TIGD6
chr19	2427689	2428087	26	TIMM13
chr11	111957350	111957627	34	TIMM8B
chr14	58894214	58894468	-9	TIMM9
chr3	156392144	156392384	59	TIPARP
chr15	102192442	102192706	20	TM2D3
chr12	50135401	50135757	-13	TMBIM6
chr3	129612565	129612850	-7	TMCC1-AS1
chr15	79603246	79603587	12	TMED3
chr7	44621661	44622189	-31	TMED4
chr1	93645324	93645591	789	TMED5
chr1	93646088	93646307	49	TMED5
chr5	177019016	177019354	36	TMED9
chr7	12250726	12250981	5	TMEM106B
chr11	60681413	60681762	216	TMEM109
chr3	50396819	50397190	-65	TMEM115
chr12	112450880	112451160	3	TMEM116
chr12	122150434	122150823	-30	TMEM120B
chr4	1722171	1722499	749	TMEM129
chr9	139685351	139685997	-103	TMEM141
chr19	48866980	48867576	216	TMEM143
chr6	52535735	52535999	-17	TMEM14A
chr6	10747847	10748132	-3	TMEM14B
chr4	153600984	153601244	203	TMEM154
chr5	87564689	87564922	-28	TMEM161B-AS1
chr16	75498152	75498841	139	TMEM170A
chr6	11537777	11538041	-551	TMEM170B
chr2	103353182	103353548	0	TMEM182
chr12	72079723	72079961	-36	TMEM19
chr22	21056804	21057023	1511	TMEM191A
chr1	212588097	212588420	9	TMEM206
chr16	67260845	67261077	-55	TMEM208
chr7	129845129	129845418	65	TMEM209
chr16	29973198	29973470	-17	TMEM219
chr2	202507346	202507593	198	TMEM237
chr9	139010555	139010995	-44	TMEM250
chr10	81838891	81839149	19	TMEM254
chr11	9336175	9336462	-3	TMEM41B
chr3	14166270	14166702	46	TMEM43
chr1	1850723	1851125	-184	TMEM52
chr1	45139984	45140219	179	TMEM53
chr1	226069943	226070270	314	TMEM63A
chr8	74888145	74888565	-22	TMEM70
chr1	201123573	201123855	-31	TMEM9
chr14	51706749	51707054	15	TMX1
chr18	66382258	66382537	13	TMX3
chr20	7999632	8000005	658	TMX4
chr5	150460091	150460345	427	TNIP1
chr3	195636577	195636845	-831	TNK2
chr10	93557952	93558256	-47	TNKS2
chr22	41843538	41843831	-657	TOB2
chr11	1330739	1331166	14	TOLLIP-AS1
chr1	235292060	235292442	5	TOMM20
chr7	22862282	22862656	2	TOMM7
chr20	39657063	39657568	-143	TOP1
chr1	179851636	179851999	640	TOR1AIP1
chr11	68816232	68816465	-2	TPCN2
chr8	81083806	81084081	-49	TPD52
chr19	507737	508037	390	TPGS1
chr15	63340361	63340673	-1	TPM1
chr3	127316965	127317208	22	TPRA1
chr20	30326743	30327093	14	TPX2
chr16	67193698	67194000	-37	TRADD
chr8	71520477	71520812	50	TRAM1
chr2	3383364	3383627	49	TRAPPC12
chr19	57874600	57874907	-50	TRAPPC2B
chr1	36614989	36615276	-17	TRAPPC3
chr19	7745542	7745850	-11	TRAPPC5
chr19	45681508	45681750	-128	TRAPPC6A
chr8	141467708	141467999	8	TRAPPC9
chr8	141474436	141474762	-5921	TRAPPC9
chr5	64920022	64920378	-13	TRIM23
chr19	59055590	59055922	-80	TRIM28
chr17	57184149	57184580	-39	TRIM37
chr4	165898694	165899004	-31	TRIM61
chr10	104408764	104409069	4664	TRIM8
chr1	40349074	40349329	-18	TRIT1
chr9	100684659	100685048	-1	TRMO
chr6	126307494	126307798	70	TRMT11
chr22	20104714	20104945	-11	TRMT2A
chrX	100306697	100307048	233	TRMT2B
chr2	29093136	29093404	-95	TRMT61B
chr1	28879320	28879686	-26	TRNAU1AP
chr15	50978915	50979249	-70	TRPM7
chr12	110283166	110283518	-12130	TRPV4
chr1	156308150	156308680	32	TSACC
chr3	12525705	12526046	-56	TSEN2
chr17	79604038	79604362	3	TSPAN10
chr15	77363328	77363578	117	TSPAN3
chr11	2421658	2422015	118	TSSC4
chr22	28315143	28315604	9	TTC28-AS1
chr2	178483545	178483924	-40	TTC30A
chr2	20101348	20101633	257	TTC32
chr14	91224759	91225007	57878	TTC7B
chr22	43583481	43583795	-501	TTLL12
chr14	76127438	76127673	4	TTLL5
chr12	49524480	49524757	686	TUBA1B
chr9	140135217	140135504	-351	TUBB4B
chr17	57970080	57970533	0	TUBD1
chr17	40811170	40811395	16	TUBG2
chr15	43663194	43663410	45	TUBGCP4
chr3	52273040	52273396	-35	TWF2
chr1	32645360	32645663	166	TXLNA
chr22	36850896	36851237	26621	TXN2
chr2	99952414	99953111	98	TXNDC9
chr18	54305874	54306272	-153	TXNL1
chr21	44527612	44527952	-66	U2AF1L5
chr19	56166580	56166886	1317	U2AF2
chr19	56165068	56165647	-59	U2AF2
chr19	18682457	18682736	-16	UBA52
chr13	99852836	99853254	-34	UBAC2-AS1
chr7	129592692	129592955	-23	UBE2H
chr4	39699607	39699855	67	UBE2K
chr12	93835855	93836148	25	UBE2N
chr1	154531353	154531573	-343	UBE2Q1
chr1	202310980	202311260	-26	UBE2T
chr20	48732514	48732780	-151	UBE2V1
chr20	48729564	48729911	-2	UBE2V1
chr7	156931414	156931654	-121	UBE3C
chr6	83775425	83775681	7	UBE3D
chr11	118230089	118230322	-91	UBE4A
chr1	10092746	10093045	-146	UBE4B
chr7	138915775	138916147	-270	UBN2
chr2	136499094	136499348	32	UBXN4
chr3	196159238	196159568	-58	UBXN7
chr9	134406553	134406915	-72	UCK1
chr13	96705537	96705905	15	UGGT2
chr19	4909846	4910081	-142	UHRF1
chr5	176433553	176433969	34	UIMC1
chr12	132379106	132379331	-61	ULK1
chr15	91478335	91478571	337	UNC45A
chr12	109535134	109535510	-77	UNG
chr17	73780742	73781057	-21	UNK
chr19	18942508	18942905	-38	UPF1
chr10	12085082	12085468	-106	UPF2
chr20	33999753	33999984	77	UQCC1
chr6	33679084	33679571	201	UQCC2
chr22	30163197	30163549	15	UQCR10
chr19	1605345	1605644	-11	UQCR11
chr8	97247729	97248032	-18	UQCRB
chr19	29703992	29704217	32	UQCRFS1
chr19	30432919	30433665	146	URI1
chr10	127511645	127512261	-116	UROS
chr1	161015628	161015857	27	USF1
chr4	76649553	76650009	75	USO1
chr16	84733395	84733689	-13	USP10
chr1	161129064	161129406	-19	USP21
chr11	113746332	113746571	-159	USP28
chr17	76836762	76837226	-385	USP36
chr17	49337694	49338053	-24	UTP18
chr12	101673700	101674001	-55	UTP20
chr8	117778473	117778714	-149	UTP23
chr4	1340627	1340880	-301	UVSSA
chr2	106810838	106811109	-178	UXS1
chr12	6580039	6580351	-130	VAMP1
chr18	9913653	9914052	-103	VAPA
chr20	56963983	56964339	-14	VAPB
chr17	41173557	41173796	783	VAT1
chr8	67579350	67579683	-64	VCPIP1
chr10	76970084	76970376	318	VDAC2
chr8	42249110	42249532	42	VDAC3
chr7	100808854	100809164	-157	VGF
chr3	10183262	10183539	81	VHL
chr19	5904531	5904770	-202	VMAC
chr9	79792201	79792617	48	VPS13A
chr15	62352501	62352863	-18	VPS13C
chr11	134094249	134094682	-34	VPS26B
chr21	38639876	38640131	-170	VPS26C
chr21	38630563	38630887	9108	VPS26C
chr11	64863430	64863735	-5	VPS51
chr19	50528503	50528987	60	VRK3
chr10	28821528	28821874	184	WAC
chr1	119683229	119683559	-99	WARS2
chr13	41634177	41634404	-1103	WBP4
chr13	52158318	52158538	-56	WDFY2
chr2	203776826	203777115	-21	WDR12
chr19	984028	984913	142	WDR18
chr21	44299579	44299949	-65	WDR4
chr2	29117339	29117682	1	WDR43
chrX	117479723	117479991	-179	WDR44
chr9	137000697	137001228	-248	WDR5
chr3	122134845	122135059	-70	WDR5B
chr7	158648982	158649399	-79	WDR60
chr17	38375390	38375622	-68	WIPF2
chr7	5229600	5229986	-42	WIPI2
chr21	40759417	40759804	-79	WRB
chr6	2765229	2765550	-277	WRNIP1
chr16	78133172	78133753	152	WWOX
chr8	87354576	87354853	-280	WWP1
chr9	100459571	100459798	7	XPA
chr6	43543588	43544025	6	XPO5
chr8	21776956	21777275	-65	XPO7
chr19	44079513	44079932	8	XRCC1
chr7	152373089	152373485	-37	XRCC2
chr2	216973677	216974180	-92	XRCC5
chr2	216979450	216979720	5565	XRCC5
chr22	42017120	42017401	-86	XRCC6
chr12	32908782	32909070	-39	YARS2
chr12	69753270	69753748	19	YEATS4
chr19	11039168	11039505	7	YIPF2
chr5	143550133	143550427	-2	YIPF5
chr8	101965047	101965339	28	YWHAZ
chr1	155658450	155658685	1	YY1AP1
chr18	5295949	5296551	-56	ZBTB14
chr1	16302411	16302848	-2	ZBTB17
chr6	151711471	151711814	1193	ZBTB2
chr21	43429978	43430297	359	ZBTB21
chr14	64970444	64970685	-1	ZBTB25
chr17	7387484	7387741	-44	ZBTB4
chr9	129567037	129567339	-97	ZBTB43
chr14	89029084	89029475	26	ZC3H14
chr2	187350747	187351063	20	ZC3H15
chr16	88636497	88636758	-162	ZC3H18
chr2	113012500	113012946	-59	ZC3H8
chr9	37120320	37120565	-27	ZCCHC7
chr5	784814	785123	-98	ZDHHC11B
chr10	99205751	99206086	30	ZDHHC16
chr6	37786714	37787020	-440	ZFAND3
chr19	36870032	36870337	-79	ZFP14
chr19	57049661	57050020	-477	ZFP28
chr1	40915538	40915859	-639	ZFP69B
chr5	32444738	32444974	11	ZFR
chr15	41099144	41099404	0	ZFYVE19
chr20	39946323	39946713	-17779	ZHX3
chr16	25269063	25269314	-333	ZKSCAN2
chr3	178789510	178789805	-1	ZMAT3
chr1	35544747	35545087	-47	ZMYM1
chr1	35734081	35734439	-308	ZMYM4
chr7	6746387	6746802	-28	ZNF12
chr19	19843774	19844081	-6	ZNF14
chr2	95831401	95831635	356	ZNF2
chr11	6947554	6947863	116	ZNF215
chr20	52210927	52211307	-11481	ZNF217
chr10	38146424	38147119	-207	ZNF248
chr8	145980776	145981093	36	ZNF251
chr16	3332786	3333019	-585	ZNF263
chr18	32870075	32870414	8	ZNF271P
chr1	200379100	200379380	-54	ZNF281
chr17	16438962	16439246	33422	ZNF287
chr7	99680388	99680666	-356	ZNF3
chr19	58962761	58963067	-57	ZNF324B
chr19	58662063	58662284	-25	ZNF329
chr19	58666334	58666642	-4340	ZNF329
chr10	38299410	38299723	-12	ZNF33A
chr10	43133968	43134185	209	ZNF33B
chr10	43048168	43048429	20	ZNF37BP
chr19	8578950	8579228	-41	ZNF414
chr19	37568965	37569199	-42	ZNF420
chr19	44123583	44123898	274	ZNF428
chr1	23695298	23695541	-45	ZNF436-AS1
chr19	56652125	56652487	-229	ZNF444
chr9	95640170	95640401	-35	ZNF484
chr10	43950929	43951303	18557	ZNF487
chr19	58874053	58874306	35	ZNF497
chr16	4818622	4818867	-1525	ZNF500
chr19	56116696	56116960	5122	ZNF524
chr19	38085637	38085871	23	ZNF540
chr19	40502766	40503036	-42	ZNF546
chr19	58193196	58193473	-3	ZNF551
chr19	58326170	58326441	-24	ZNF552
chr19	2819681	2820001	-31	ZNF554
chr19	9434653	9435003	-74	ZNF559
chr19	36705917	36706189	-67	ZNF565
chr19	37178329	37178644	-28	ZNF567
chr19	44100223	44100634	-116	ZNF576
chr19	56098743	56098960	-6640	ZNF579
chr19	56904804	56905182	-23	ZNF582
chr19	56915250	56915674	79	ZNF583
chr3	48282506	48282814	64	ZNF589
chr19	38210560	38210805	9	ZNF607
chr5	123985430	123985778	95201	ZNF608
chr2	71558706	71559041	-12	ZNF638
chr17	47439577	47440073	10	ZNF652
chr19	11616652	11616908	-42	ZNF653
chr12	124457701	124457917	47	ZNF664
chr1	249153105	249153503	11	ZNF692
chr19	9420356	9420681	-128	ZNF699
chr19	53073390	53073651	-6	ZNF701
chr19	57106476	57106708	-72	ZNF71
chr3	75834610	75834870	-6	ZNF717
chr7	61969340	61969630	794949	ZNF733P
chr7	63767621	63767961	-6460	ZNF736
chr16	30546156	30546486	-30	ZNF747
chr19	56632822	56633165	-251	ZNF787
chr19	58789870	58790119	-324	ZNF8
chr7	127032679	127032941	-32	ZNF800
chr16	71917961	71918196	-3	ZNF821
chr11	64884892	64885124	202	ZNHIT2
chr7	30324158	30324417	364	ZNRF2
chr7	76026716	76026976	5	ZP3
chr7	76022388	76022749	-4273	ZP3
chrX	15808389	15808706	-27	ZRSR2
chr16	3450882	3451239	5	ZSCAN32
chr10	75546010	75546224	735	ZSWIM8
chr19	48707099	48707390	33295	ZSWIM9
chr10	58121051	58121310	-146	ZWINT
