# Supplementary material for: MYC regulates ribosome biogenesis and mitochondrial gene expression programs through its interaction with host cell factor–1
Source: eLife. 2021 Jan 8;10:e60191. doi: 10.7554/eLife.60191 (PMC7793627; doi:10.7554/eLife.60191)
Supplement: Figure 5—source data 2. [file elife-60191-fig5-data2.xlsx]

## Sheet: Sheet1
Chr	Start	End	Distance to TSS	Gene Name
chr7	102105189	102105440	-4	ALKBH4
chr4	967346	967559	-95	DGKQ
chr20	5100583	5100844	-109	PCNA
chr1	25566440	25566716	7367	RSRP1
chr19	7459877	7460106	-40	ARHGEF18
chr2	86790488	86790796	-76	CHMP3
chr10	105110784	105111057	-23	PCGF6
chr19	9434653	9435003	-27	ZNF559
chr18	44676424	44676694	312	HDHD2
chr7	5229600	5229931	-99	WIPI2
chr4	84406180	84406487	-80	ABRAXAS1
chr2	26256565	26256989	-176	RAB10
chr3	136471250	136471615	-212	STAG1
chr16	48643997	48644226	-20	N4BP1
chr2	187350747	187351063	-82	ZC3H15
chr19	30096937	30097250	-97	POP4
chr1	173445892	173446170	263	LOC100506023
chr19	14640504	14640785	238	TECR
chr18	47814013	47814289	541	CXXC1
chr17	80455081	80455320	-22408	FOXK2
chr8	117778473	117778714	-170	UTP23
chr19	58326170	58326441	-24	ZNF552
chr11	125757385	125757705	590	HYLS1
chr5	1345142	1345439	-76	CLPTM1L
chr10	124739759	124740011	-32	PSTK
chr9	133568962	133569337	2	EXOSC2
chr5	64920087	64920378	-72	TRIM23
chr11	65430107	65430538	65	RELA
chr11	506737	507381	183	RNH1
chr9	139685351	139685997	-122	TMEM141
chr17	3571937	3572197	-39	EMC6
chr16	4233868	4234137	58079	SRL
chr15	65321806	65322059	45	MTFMT
chr1	156308150	156308680	98	TSACC
chr12	124118192	124118441	30	GTF2H3
chrX	117479789	117479973	-155	WDR44
chr7	158648982	158649399	-59	WDR60
chr1	47133807	47133841	275	ATPAF1
chr14	39643860	39644114	-471	PNN
chr4	103790058	103790559	159	CISD2
chr16	4401193	4401562	-55	PAM16
chr9	139964646	139964939	217	SAPCD2
chr5	175395129	175395356	76	THOC3
chr6	149887200	149887441	-191	GINM1
chr17	7210529	7210654	270	EIF5A
chr2	25015903	25016186	60	CENPO
chr16	67515056	67515297	-116	ATP6V0D1
chr9	17134811	17135108	-79	CNTLN
chr7	100025786	100026136	365	ZCWPW1
chr8	145980776	145981093	-18	ZNF251
chr7	99717077	99717394	-22	CNPY4
chr7	149047	149641	94	LOC102723672
chr18	19180580	19180970	-110	ESCO1
chr3	184080997	184081304	1	POLR2H
chr19	11670046	11670352	-148	ELOF1
chr12	117628270	117628499	-109	FBXO21
chr1	1850723	1851125	-206	TMEM52
chr5	61601811	61602139	-14	KIF2A
chr2	97481861	97482109	-20	CNNM3
chr20	48808337	48808560	158	CEBPB-AS1
chr1	1243761	1244094	-33	PUSL1
chr7	4681275	4681630	-40474	FOXK1
chr5	89825404	89825643	-122	LYSMD3
chr16	30669074	30669506	-462	FBRS
chr12	95397441	95397681	-72	NDUFA12
chr11	77850627	77850969	-41	KCTD21-AS1
chr7	102389218	102389465	-58	FAM185A
chr17	55706878	55707112	-21222	LOC101927539
chr14	24740529	24741009	64	RABGGTA
chr9	86323119	86323330	-22	LOC105376114
chr19	16739019	16739273	-131	MED26
chr14	23058017	23058282	-19	DAD1
chr13	41363433	41363748	-157	SLC25A15
chr13	42623411	42623721	782	DGKH
chr6	109169431	109169731	-38	ARMC2
chr6	88411901	88412088	-43	AKIRIN2
chr14	102430652	102430826	-171	DYNC1H1
chr5	1799897	1800173	-84	MRPL36
chr16	2961737	2962013	-105	FLYWCH1
chr9	110045309	110045608	-102	RAD23B
chr2	32581885	32582223	-42	BIRC6
chr11	46264827	46265045	-34277	CREB3L1
chr19	49956513	49956787	168	ALDH16A1
chr16	89768248	89768516	-269	SPATA2L
chr7	50517940	50518243	13	FIGNL1
chr11	47664039	47664428	-27	MTCH2
chr19	16582655	16583030	-19	EPS15L1
chr16	14723992	14724302	-30	PARN
chr2	74734457	74734637	275	PCGF1
chr6	33679084	33679571	150	UQCC2
chr12	101673734	101674001	-16	UTP20
chr5	784814	785089	-107	ZDHHC11B
chr3	148709266	148709493	184	GYG1
chr2	190648950	190649339	-32	PMS1
chr17	27229977	27230298	-40	DHRS13
chr10	27389223	27389633	-1	ANKRD26
chr12	57623399	57623586	-2	SHMT2
chr1	199998203	199998442	1484	NR5A2
chr1	174968699	174969278	-95	CACYBP
chr7	140714733	140714973	-101	MRPS33
chr3	122134845	122134998	-12	WDR5B
chr4	26862163	26862446	-83	STIM2-AS1
chr5	612280	612517	-57	CEP72
chr1	10092746	10093045	-121	UBE4B
chr11	67250658	67250911	-203	AIP
chr3	43732212	43732508	-2	ABHD5
chr11	18417611	18417920	-48	LDHA
chr7	82792152	82792388	-70	PCLO
chr7	25164884	25165293	-108	CYCS
chr4	129209173	129209541	-389	PGRMC2
chr5	77590453	77590754	-24	AP3B1
chr9	132175979	132176414	-74743	LINC00963
chr5	133561709	133562239	-210	PPP2CA
chr19	36630721	36631046	-85	CAPNS1
chr18	12948291	12948624	447	SEH1L
chr20	30102093	30102307	-13	HM13
chr8	1711831	1712114	102	CLN8
chr11	108535642	108535857	-47	DDX10
chr2	96931681	96932396	75	CIAO1
chr2	11606125	11606478	2	E2F6
chr17	4843176	4843471	18	SLC25A11
chr9	102668795	102669073	-2	STX17
chr19	17185847	17186221	228	HAUS8
chr3	193310847	193311080	30	OPA1
chr8	142138272	142138558	-273	DENND3
chr20	60697165	60697549	-174	LSM14B
chr10	127511645	127511950	30	UROS
chr10	12171484	12171827	15	SEC61A2
chr11	10315618	10315899	-4	SBF2
chr9	134406553	134406841	-35	UCK1
chr2	68694568	68694869	1	APLF
chr19	11071215	11071630	-284	SMARCA4
chr19	14016787	14017133	18	C19orf57
chr17	40718888	40719153	-58	MLX
chr22	23863958	23864175	-16223	PCAT14
chr17	42580723	42581080	-127	GPATCH8
chr12	6472389	6472646	-11809	LTBR
chr1	183604892	183605164	-110	ARPC5
chr20	23401983	23402385	-28	NAPB
chr1	150488032	150488422	-6	FALEC
chr2	3383364	3383627	30	TRAPPC12
chr16	31471072	31471318	878	ARMC5
chr14	102553406	102553766	-205	HSP90AA1
chr19	18794193	18794300	-244	CRTC1
chr8	94753175	94753425	-63	RBM12B
chr1	1655747	1656025	-90	CDK11A
chrX	47341877	47342115	-119	LINC01560
chr22	41347241	41347481	-21	RBX1
chr11	28129675	28129987	-104	METTL15
chr20	62258442	62258772	19	MHENCR
chr11	74204174	74204608	-39	LOC100287896
chr7	92157740	92158006	-39	PEX1
chr22	41843538	41843831	-879	TOB2
chr14	24036545	24036906	275	AP1G2
chr2	65357263	65357557	25	RAB1A
chr19	56632822	56633165	-329	ZNF787
chr6	153304671	153304936	-89	FBXO5
chr16	23689964	23690248	-104	PLK1
chr17	27944162	27944421	844	CORO6
chr5	177019016	177019354	-19	TMED9
chr16	2581883	2582160	-15	MIR3178
chr5	137911330	137911592	-371	HSPA9
chr20	23338910	23339163	-272	LINC01431
chr8	21867691	21867942	-13829	NPM2
chr6	15663197	15663408	-13	DTNBP1
chr19	44123583	44123898	41	ZNF428
chr2	32264787	32265022	0	DPY30
chr2	28113451	28113767	13	BABAM2
chr19	37568965	37569199	-42	ZNF420
chr9	131580517	131580848	-97	ENDOG
chr5	172386309	172386571	13	RPL26L1
chr1	63833116	63833375	-53	ALG6
chr9	66493990	66494400	-25	LOC100132249
chr6	36561874	36562133	-87	SRSF3
chr11	62494697	62495266	-52	HNRNPUL2
chr1	28969535	28969765	-71	TAF12
chr21	35747480	35747512	-253	SMIM11A
chr20	48729564	48729907	0	UBE2V1
chr3	49726852	49727069	-30	RNF123
chr7	139024977	139025392	-12	FMC1
chr15	65116067	65116380	1623	PIF1
chr17	7387484	7387741	-44	ZBTB4
chr22	46692475	46692820	-90	GTSE1-DT
chr17	48238847	48239040	-4423	SGCA
chr15	81282062	81282339	-40	MESD
chr1	16162191	16162692	-11761	SPEN
chrX	7066098	7066391	-50	PUDP
chr2	136875620	136875968	-69	CXCR4
chr20	39657063	39657568	-147	TOP1
chr4	2243760	2244080	-72	HAUS3
chr12	69139756	69139973	-92	SLC35E3
chr15	72410351	72410713	-41	MYO9A
chr18	18691721	18691990	-81	ROCK1
chr19	40030677	40030956	-15	EID2
chr4	6675525	6675858	-83	LINC02482
chr15	91478335	91478571	-62	UNC45A
chr18	11851188	11851430	-103	CHMP1B
chr11	9779627	9779868	-93	SBF2-AS1
chr7	99869726	99870052	-34	CASTOR3
chr3	129612565	129612850	-7	TMCC1-AS1
chr2	220408328	220408654	40	CHPF
chr19	633337	633783	-23	POLRMT
chr21	34960938	34961231	-94	DONSON
chr1	117601973	117602222	15	LOC101929099
chr9	131798764	131799042	-2	MIGA2
chr4	668043	668448	-86	MYL5
chr11	65420326	65420605	3802	MIR4489
chr10	126150311	126150548	37	LHPP
chr19	3987909	3988068	-2527	EEF2
chr6	24775045	24775221	-32	GMNN
chr19	4328507	4328811	10165	STAP2
chr4	120221671	120221985	-28	C4orf3
chr4	44728456	44728755	-32	GNPDA2
chr7	25019727	25019963	-48	OSBPL3
chr9	36487845	36488100	-84887	MELK
chr6	24402997	24403298	11	MRS2
chr22	43583488	43583795	-501	TTLL12
chr16	30076252	30076635	625	ALDOA
chr14	59655220	59655467	-42	DAAM1
chr4	100009754	100010002	61	ADH5
chr4	15656826	15657054	40	FBXL5
chr16	75498152	75498841	91	TMEM170A
chr1	154947228	154947564	239	CKS1B
chr19	48281781	48282078	-31	SELENOW
chr17	40811170	40811395	-20	TUBG2
chr9	94124071	94124361	-10	AUH
chr10	94333674	94334000	13	IDE
chr4	25235438	25235700	-86	PI4K2B
chr5	130970788	130971112	-28	RAPGEF6
chr1	35544818	35545087	-12	ZMYM1
chr19	40324759	40325064	-38	DYRK1B
chr9	127703247	127703613	-68	GOLGA1
chr4	159593022	159593485	0	ETFDH
chr4	1340627	1340880	-243	UVSSA
chr5	118788276	118788516	204	HSD17B4
chr4	41218422	41218673	-1988	APBB2
chr1	113498751	113499025	87	SLC16A1
chr11	58345767	58345986	-164	LPXN
chr13	95201530	95201843	-26	DCT
chr12	49463774	49464025	-137	RHEBL1
chr11	6947554	6947863	51	ZNF215
chr1	245134070	245134303	-15	LOC101928068
chr1	114354756	114355285	78	RSBN1
chr12	57916504	57916738	14	MBD6
chr6	38670934	38670980	-36	GLO1
chr6	52930076	52930340	6	FBXO9
chr1	174128354	174128587	-45	RABGAP1L-DT
chr16	67753096	67753431	-44	GFOD2
chr16	50099768	50100437	221	HEATR3
chr10	135207484	135207805	-17	MTG1
chr5	6712980	6713538	-286	TENT4A
chr19	17337179	17337440	274	OCEL1
chr10	27792990	27793374	-51	RAB18
chr19	51612021	51612186	-437	CTU1
chr8	11627040	11627205	-97	NEIL2
chr5	1801290	1801673	-40	NDUFS6
chr22	45705440	45706063	32	FAM118A
chr19	58858973	58859290	-4205	A1BG-AS1
chr2	86332821	86333168	15	POLR1A
chr9	140149533	140149788	-119	NELFB
chr1	9712044	9712335	400	PIK3CD
chr14	55493730	55493953	-24	WDHD1
chr12	108154860	108155180	-106	PRDM4
chr19	18794502	18794584	53	CRTC1
chr9	77567639	77567987	15	C9orf40
chr11	11642592	11642912	800	GALNT18
chr10	104474019	104474385	-48	ARL3
chr9	35812101	35812343	37	SPAG8
chr20	57617820	57618259	-138	SLMO2-ATP5E
chr4	47916598	47916915	-72	NFXL1
chr3	42623290	42623624	2	SEC22C
chr12	57146031	57146290	-53	PRIM1
chr8	21776956	21777275	-58	XPO7
chr3	49824045	49824299	-197	IP6K1
chr19	18208522	18208754	50	MAST3
chr3	50396819	50397184	-49	TMEM115
chr19	34850032	34850536	-5361	GPI
chr19	55769996	55770706	34	PPP6R1
chr19	49217584	49217867	2489	MAMSTR
chr9	114393455	114393691	-41	DNAJC25
chr4	39699607	39699855	-25	UBE2K
chr11	535558	535757	-81	HRAS
chr1	243418493	243418802	61	CEP170
chr19	14117293	14117701	-365	RFX1
chr17	7210848	7210880	-83	EIF5A
chr14	58894214	58894468	-9	TIMM9
chr5	179105389	179105835	2423	CBY3
chr4	108641270	108641765	-127	PAPSS1
chr19	39926538	39926760	-60	RPS16
chr8	110551861	110552132	67	EBAG9
chr9	115110703	115110905	-14860	PTBP3
chr19	36103497	36103753	-12	HAUS5
chr16	67596358	67596584	42	CTCF
chr22	19109858	19110107	-15	DGCR2
chr3	9005097	9005250	-17	RAD18
chrX	119763792	119764129	45	C1GALT1C1
chr17	27717082	27717423	-428	MIR4523
chr14	91224767	91224990	57883	TTC7B
chr17	3627017	3627281	-48	HASPIN
chr17	7738983	7739210	-4128	KDM6B
chr10	70231572	70231931	-21	DNA2
chrX	41782833	41783175	-197	CASK
chr9	138799475	138799757	-224	CAMSAP1
chr3	48699090	48699339	1105	CELSR3
chr20	13765515	13765839	3	NDUFAF5
chr5	130500771	130501146	-9	HINT1
chr20	36034985	36035278	60600	SRC
chr19	18043618	18043852	-89	CCDC124
chr3	100428046	100428371	33	TFG
chr4	76649553	76649886	13	USO1
chr19	46850142	46850400	-73	PPP5C
chr19	984110	984755	104	WDR18
chr11	76155902	76156001	-111	EMSY
chr9	33290295	33290597	-68	NFX1
chr17	8103485	8103740	9931	AURKB
chr8	117886932	117887095	26	MIR3610
chr5	74532692	74532945	-115	ANKRD31
chr5	138629174	138629464	-110	MATR3
chr2	33824189	33824618	26	FAM98A
chr9	6757869	6758245	707	KDM4C
chr16	15982240	15982620	30	FOPNL
chr11	66445211	66445447	29	RBM4B
chr6	170615531	170615889	-100	FAM120B
chr6	10404316	10404841	-157	TFAP2A-AS2
chr14	54908055	54908301	-86	CNIH1
chr1	179851636	179851999	640	TOR1AIP1
chr22	20104714	20104945	-80	TRMT2A
chr1	59012338	59012553	-47	OMA1
chr1	209957719	209958098	-4	C1orf74
chr19	18942508	18942905	-62	UPF1
chr17	29421724	29422056	-55	NF1
chr14	65879176	65879611	-55	FUT8
chr9	139839116	139839374	-55	FBXW5
chr6	126307594	126307798	10	TRMT11
chr3	142315072	142315380	-9	PLS1
chr21	47648621	47648916	-30	LSS
chr3	23987477	23987713	-17	NR1D2
chr14	23770764	23771014	1179	PPP1R3E
chr2	242447936	242448285	0	STK25
chr11	67085129	67085448	-22	LOC100130987
chr19	56652125	56652487	-350	ZNF444
chr5	94890614	94890965	-16	ARSK
chr2	47629915	47630274	-112	MSH2
chr1	213189078	213189304	18	ANGEL2
chr20	49347432	49348053	-375	PARD6B
chr4	151936720	151937038	0	LRBA
chr2	17934957	17935446	65	GEN1
chr3	48754605	48754902	-42	IP6K2
chr12	93835855	93836148	-278	UBE2N
chr1	16693540	16693833	-51	SZRD1
chr17	27916608	27916823	-49	GIT1
chr10	73975888	73976146	17	ASCC1
chr18	5295949	5296551	-231	ZBTB14
chr3	128902711	128902945	-89	CNBP
chr1	228353125	228353911	13	IBA57
chr12	32908782	32908907	-13	YARS2
chr5	90679097	90679394	-111	ARRDC3
chr15	64995451	64995692	-91	OAZ2
chr18	32870119	32870414	30	ZNF271P
chr1	16563497	16563855	2	CPLANE2
chr2	219081641	219081927	-128	ARPC2
chr17	40336135	40336418	1194	HCRT
chr9	134000677	134000986	-142	NUP214
chr22	39898129	39898383	21	MIEF1
chr19	16771015	16771359	-219	SMIM7
chr21	38362388	38362612	11	HLCS
chr18	51795691	51795948	-30	POLI
chr5	32444738	32444974	-10	ZFR
chr17	40761354	40761669	-66	RETREG3
chr11	105948222	105948457	-50	AASDHPPT
chr5	137368256	137368608	-31	LOC100130172
chr10	43950929	43951303	18557	ZNF487
chr9	139981106	139981539	-53	MAN1B1-DT
chr1	46269023	46269360	-88	MAST2
chr6	42018104	42018322	-49	TAF8
chr14	96968509	96968857	-20	LOC730202
chr9	124921934	124922196	-7	NDUFA8
chr2	170655232	170655448	-41	SSB
chr3	48282506	48282814	66	ZNF589
chr20	35579944	35580388	-55	SAMHD1
chr19	39109443	39109817	-198	EIF3K
chr19	44100240	44100634	-107	ZNF576
chr10	70091563	70091893	-40	HNRNPH3
chr6	135375825	135376182	-43	HBS1L
chr7	156931414	156931654	-86	UBE3C
chr16	3332786	3333019	-589	ZNF263
chr3	184032128	184032485	23	EIF4G1
chr7	157129455	157129788	-77	DNAJB6
chr20	34129590	34129923	-71	ERGIC3
chr1	26799463	26799714	657	HMGN2
chr5	112043076	112043346	16	APC
chr2	71558706	71559041	-12	ZNF638
chr12	104359759	104360083	271	TDG
chr19	11039168	11039505	-21	YIPF2
chr1	176176314	176176930	-200	COP1
chr1	94883752	94884013	-51	ABCD3
chr12	31478980	31479285	-11	SINHCAF
chr16	1543206	1543465	-26	TELO2
chr6	13615332	13615864	31	NOL7
chr16	188598	188918	-61	NPRL3
chr12	120554492	120554922	-150	RAB35
chr7	76751665	76751899	-150	CCDC146
chr17	37026066	37026331	86	LASP1
chr12	69080469	69080821	-6	LOC100507250
chr13	52158318	52158538	-170	WDFY2
chr5	72794008	72794347	-73	BTF3
chr12	64845664	64846012	-62	TBK1
chr19	56166580	56166886	1317	U2AF2
chr2	198364559	198365435	1	HSPD1
chr11	65029073	65029488	-153	POLA2
chr1	202310980	202311260	-26	UBE2T
chr2	39351311	39351642	-3872	SOS1
chr2	27651950	27652141	547	NRBP1
chr12	31226623	31226939	0	DDX11-AS1
chr3	50388127	50388544	42	CYB561D2
chr10	104263642	104263875	29	SUFU
chr19	45954078	45954266	-148	ERCC1
chr20	30326833	30327093	-130	TPX2
chr16	53537378	53537709	-327	AKTIP
chr3	195717032	195717363	-47	SDHAP1
chr20	61274144	61274396	415	SLCO4A1
chr17	38375440	38375622	-25	WIPF2
chr19	47633870	47634270	-22	SAE1
chr19	17416347	17416633	-191	MRPL34
chr1	17380564	17380869	-51	SDHB
chr20	42286000	42286289	-9515	MYBL2
chr15	68132520	68132626	-190	RNU6-1
chr9	86536339	86536625	-23	KIF27
chr7	44621661	44622189	-31	TMED4
chr11	118991829	118992243	-197	HINFP
chr4	926064	926321	17	TMEM175
chr17	62971529	62971862	8	AMZ2P1
chr7	105698413	105698636	54234	SYPL1
chr4	99064623	99064834	-101	STPG2
chr8	87354600	87354853	-50	WWP1
chr16	2390677	2391106	-32	ABCA17P
chr16	3661540	3661826	-76	SLX4
chr10	43048168	43048429	20	ZNF37BP
chr16	3314385	3314629	739	LINC00921
chr2	232526755	232527268	-46224	PTMA
chr10	93668268	93668543	838	FGFBP3
chr13	28024135	28024376	71	MTIF3
chr2	29117339	29117682	-23	WDR43
chr12	69753311	69753748	6	YEATS4
chr14	45553122	45553493	-12	PRPF39
chr2	120517160	120517454	-191	PTPN4
chr7	142985219	142985610	-30	CASP2
chr4	6717649	6717994	-80	BLOC1S4
chr18	33077462	33077849	-83	INO80C
chr12	49524480	49524757	560	TUBA1B
chr10	94351312	94351618	-1422	KIF11
chr3	53916042	53916319	-1	ACTR8
chr17	58677286	58677682	-60	PPM1D
chr16	25269063	25269314	-22	ZKSCAN2
chr9	100459571	100459780	16	XPA
chr6	36515191	36515421	-50	STK38
chr4	177116683	177117001	-106	SPATA4
chr12	108956236	108956563	1160	ISCU
chr1	109419478	109419709	-14	GPSM2
chr11	118662412	118662640	-653	DDX6
chr12	27090752	27091133	-28	INTS13
chr15	79603246	79603587	12	TMED3
chr10	105726704	105726924	-84	SLK
chr19	50169054	50169240	-15	IRF3
chr17	76836762	76837226	-385	USP36
chr1	153606306	153606615	2	CHTOP
chr6	109416190	109416475	-283	SESN1
chr5	143550139	143550403	-48	YIPF5
chr19	3761576	3761802	1	APBA3
chr19	2783100	2783163	140	SGTA
chr15	93447454	93447744	-30	MIR3175
chr20	54967555	54967824	-12	CSTF1
chr19	14184094	14184319	33	MIR1199
chr11	116706636	116706931	-50	APOA1-AS
chr11	64889576	64889926	35	MRPL49
chr15	74284583	74284815	-10	STOML1
chr12	54411728	54411907	1145	HOXC5
chr3	135969031	135969352	9	PCCB
chr17	73105841	73106184	-52	ARMC7
chr11	134094249	134094682	-39	NCAPD3
chr13	77565929	77566341	-81	CLN5
chr3	10157201	10157419	-49	BRK1
chr21	33651208	33651509	2	MIS18A
chr2	37423573	37423742	18	CEBPZOS
chr19	33667724	33668048	-17350	LRP3
chr2	220143996	220144281	50	DNAJB2
chr19	14529734	14530081	246	DDX39A
chr19	4304465	4304727	1	FSD1
chr17	42277157	42277392	-1745	ATXN7L3
chr11	63448714	63449037	-47	RTN3
chr17	80056099	80056323	-99	FASN
chr16	29827161	29827632	-77	PAGR1
chr12	120755260	120755529	10188	PLA2G1B
chr6	114292370	114292696	-221	HDAC2
chr7	30067801	30068158	2	PLEKHA8
chr6	119256120	119256339	98	MCM9
chr6	44355163	44355769	23	CDC5L
chr5	61708441	61708616	-45	IPO11
chr19	18433941	18434298	-233	LSM4
chrX	70288168	70288410	9	SNX12
chr4	184426003	184426052	-184	ING2
chr12	112450880	112451160	3	TMEM116
chr22	20850056	20850334	-113	KLHL22
chr19	3762720	3763156	258	MRPL54
chr17	37910659	37910937	14578	GRB7
chr11	65819465	65819842	-182	SF3B2
chr17	73761145	73761420	-9	GALK1
chr19	2051195	2051618	-163	MKNK2
chr13	73632833	73633063	-195	KLF5
chr12	114404143	114404383	-133	RBM19
chr9	35658136	35658429	-5	CCDC107
chr10	76970084	76970376	318	VDAC2
chr14	50053003	50053282	-8	RPS29
chr3	49449326	49449867	-43	TCTA
chr2	136499094	136499348	-204	UBXN4
chr12	120426658	120426931	-246	BICDL1
chr22	28315143	28315578	-4	TTC28-AS1
chr8	71520477	71520812	7	TRAM1
chr10	6130732	6131111	-76	RBM17
chr3	197517942	197518267	7	LRCH3
chr22	19419785	19420103	-124	MRPL40
chr16	15068715	15068749	72	PDXDC1
chr16	11945256	11945660	-59	RSL1D1
chr22	21056849	21057023	1534	TMEM191A
chr11	125772969	125773201	16	PUS3
chr22	24199827	24200307	5	SLC2A11
chr2	242254989	242255318	104	HDLBP
chr17	79875930	79876161	7	SIRT7
chr6	46097605	46097895	24	ENPP4
chr14	77564457	77564806	30	CIPC
chr6	39082784	39083171	-15	SAYSD1
chr2	242626204	242626478	-94	ING5
chr2	234160079	234160338	-9	ATG16L1
chr13	50510503	50510865	-47	SPRYD7
chr3	106959375	106959651	-26	DUBR
chr20	34359658	34359858	-179	PHF20
chr7	150102290	150102512	-439	LOC728743
chr10	131934462	131934705	-56	GLRX3
chr13	113862906	113863222	-22	CUL4A
chr6	119670919	119671206	-136	MAN1A1
chr1	154531353	154531573	-325	UBE2Q1
chr19	572198	572613	-191	BSG
chr16	67062712	67062983	-205	CBFB
chr12	53574192	53574435	117	CSAD
chr14	35008839	35009048	0	EAPP
chr17	28256714	28257024	-52	EFCAB5
chr3	71632712	71632935	56	FOXP1
chr9	79792201	79792617	-41	VPS13A
chr1	167189589	167190039	-308	POU2F1
chr1	234614768	234615073	5	TARBP1
chr17	49230804	49231038	1	NME1
chr17	77005770	77006134	-106	CANT1
chr13	41885174	41885550	-41	NAA16
chr20	62273413	62273727	10549	STMN3
chr8	101322361	101322670	-334	RNF19A
chr9	20683956	20684272	635	FOCAD-AS1
chr10	86088390	86088412	56	CCSER2
chr1	84971756	84972101	-141	SPATA1
chr12	123942931	123943007	283	SNRNP35
chr2	42396237	42396462	-144	EML4
chr1	154244986	154245162	-31	HAX1
chr1	28695939	28696174	-195	PHACTR4
chr19	48707099	48707390	33307	ZSWIM9
chr22	21355888	21356534	0	THAP7-AS1
chr2	101179254	101179835	89	PDCL3
chr1	11159798	11160082	-14	EXOSC10
chr20	62526227	62526548	-92	DNAJC5
chr17	60005237	60005460	-5	INTS2
chr19	2785215	2785601	-93	THOP1
chr12	13080392	13080683	-123	GPRC5D-AS1
chr1	202317677	202317891	-43	PPP1R12B
chr16	75467259	75467590	-23	CFDP1
chr19	18058526	18059262	-3217	KCNN1
chr15	83680199	83680621	-19	C15orf40
chr12	120875502	120875882	-224	COX6A1
chr1	8021571	8021872	7	PARK7
chr11	65729031	65729202	-89	SART1
chr7	100026799	100027507	83	MEPCE
chr3	49507410	49507665	-28	DAG1
chr8	145743129	145743351	-30	RECQL4
chr5	134181402	134181764	-75	C5orf24
chr12	12939776	12940139	1364	APOLD1
chr14	64854834	64855146	-81	MTHFD1
chr10	69835055	69835278	-126	HERC4
chr20	32699951	32700341	-97	EIF2S2
chr1	22378901	22379264	-120	CDC42
chr12	117295958	117296136	23199	HRK
chr18	20513653	20513941	-42	RBBP8
chr2	99953719	99953939	-23	EIF5B
chr6	34433695	34433917	-47	PACSIN1
chr18	19320589	19320905	-543	MIB1
chr19	1021595	1021697	125	RNU6-7
chr9	100174149	100174387	-110	TDRD7
chr22	21271525	21271797	-34	CRKL
chr19	36422279	36422659	-4807	LRFN3
chr3	48594303	48594758	-294	PFKFB4
chr5	176882229	176882567	7029	DBN1
chr3	150320873	150321199	-72	SELENOT
chr19	5978006	5978490	-97	RANBP3
chr17	61851335	61851557	-84	DDX42
chr19	17716703	17717001	50394	COLGALT1
chrX	100306807	100307048	173	TRMT2B
chr19	19843775	19844081	-7	ZNF14
chr20	23342406	23342875	-179	GZF1
chr17	46178723	46178999	-21	CBX1
chr17	35078629	35078812	120708	MRM1
chr21	47878612	47878877	-60	DIP2A
chr8	104033090	104033420	-56	ATP6V1C1
chr13	25086868	25087099	-67	PARP4
chr8	38034183	38034471	-46	BAG4
chrX	133931147	133931365	6	FAM122B
chr11	19262607	19262916	-269	E2F8
chr19	2783184	2783468	-55	SGTA
chr1	47069865	47070139	-62	MKNK1
chr16	30709324	30710531	-135	LOC730183
chr2	216979485	216979720	5531	XRCC5
chr2	29093136	29093404	-95	TRMT61B
chr6	10747847	10748132	-3	TMEM14B
chr7	152373089	152373485	-61	XRCC2
chr4	184425708	184425977	-174	LOC389247
chr15	59041956	59042292	-218	ADAM10
chr22	31503503	31503677	-36	SELENOM
chr2	68478732	68478763	917	PPP3R1
chr14	91790353	91790668	-70286	GPR68
chr11	58869878	58870112	-4663	FAM111B
chr3	127316965	127317208	-12	TPRA1
chr19	39421005	39421288	-202	MRPS12
chr19	4124076	4124371	-97	MAP2K2
chr8	81083806	81084035	-121	TPD52
chr7	33102255	33102584	-10	NT5C3A
chr19	12904262	12904506	2084	JUNB
chr16	2524942	2525204	-55	TBC1D24
chr5	56469023	56469538	-495	GPBP1
chr2	9983376	9983903	36	TAF1B
chr19	56116696	56116960	5174	ZNF524
chr1	197170476	197170753	-20	CRB1
chr17	7835304	7835534	20	CNTROB
chr8	6263969	6264254	-2	MCPH1
chr4	15683198	15683560	-71	FAM200B
chr3	156892637	156893019	-14279	CCNL1
chr1	1550593	1551203	18	MIB2
chr6	692564	692820	447	EXOC2
chr3	17784075	17784494	-53	TBC1D5
chr17	8339109	8339293	-1	NDEL1
chr19	50979549	50979884	-48	EMC10
chr19	45681508	45681750	-134	TRAPPC6A
chr1	46152164	46152975	-364	GPBP1L1
chr19	7968358	7968889	-139	MAP2K7
chr4	99850260	99850521	-106	EIF4E
chr3	129158844	129159147	27	MBD4
chr17	79604038	79604278	-20	NPLOC4
chr13	48669092	48669442	10	MED4
chr5	138677898	138678222	-63	PAIP2
chr19	46272485	46272851	-158	SIX5
chr12	9600723	9600978	-82	DDX12P
chr1	155145608	155146422	-211	KRTCAP2
chr3	183892449	183892782	-19	AP2M1
chr14	81687176	81687524	-47	GTF2A1
chr2	99757721	99758317	-57	C2orf15
chr19	42829379	42829744	-226	MEGF8
chr9	131038313	131038602	32	SWI5
chr22	24236954	24237287	550	MIF
chr1	170043696	170043988	-6	KIFAP3
chr21	45553239	45553666	-42	GATD3A
chr4	84376915	84377241	-7	MRPS18C
chr19	5690017	5690376	-110	RPL36
chr19	7587300	7587546	-87	MCOLN1
chr16	46723323	46723586	-117	ORC6
chr9	32550867	32551242	-88	SMIM27
chr10	43133968	43134185	-58	ZNF33B
chr1	70686903	70687187	-18	SRSF11
chr7	42971675	42972080	-98	MRPL32
chr4	83206006	83206218	89032	HNRNPD
chr20	32307857	32308076	150	PXMP4
chr1	9599258	9599487	-152	SLC25A33
chr7	139044869	139045162	375	LUC7L2
chr19	38754961	38755568	51	SPINT2
chr7	66119321	66119607	-42	LOC100996437
chr10	127512026	127512260	28	BCCIP
chr14	100751631	100752009	8126	MIR6764
chr16	70100007	70100016	-160	PDXDC2P-NPIPB14P
chr16	790910	791144	-30	CIAO3
chr7	89975792	89976043	-113	GTPBP10
chr19	59055590	59055922	325	TRIM28
chr16	87984559	87985196	-163	BANP
chr10	101491875	101492095	-6	CUTC
chr10	69644764	69645023	-46	SIRT1
chr19	8578950	8578991	81	ZNF414
chr19	2427689	2428074	-297	TIMM13
chr8	92082262	92082541	16	OTUD6B-AS1
chr7	5085285	5085619	-39	RBAK-RBAKDN
chr17	39844829	39845137	-154	EIF1
chr8	103822841	103823217	3979	GASAL1
chr7	102920594	102920887	19	DPY19L2P2
chr2	106810838	106811109	-178	UXS1
chr19	41903154	41903468	-47	EXOSC5
chr19	36236346	36236531	-114	PSENEN
chr2	26101344	26101677	-154	ASXL2
chr7	155089352	155089566	-23	INSIG1
chr7	63767621	63767961	-6460	ZNF736
chr5	141016802	141017027	350	RELL2
chr10	134145181	134145810	-111	STK32C
chr8	67579350	67579525	29	VCPIP1
chr7	98923318	98923642	-16	ARPC1A
chr3	11313871	11314195	-50	ATG7
chr10	12085082	12085468	-106	UPF2
chr11	74109688	74109949	-340	PGM2L1
chr15	34629928	34630374	107	SLC12A6
chr17	73401754	73402047	-110	GRB2
chr10	95653559	95653818	-47	SLC35G1
chr11	73087211	73087526	-76	RELT
chr22	45559548	45559950	-57	NUP50
chr19	5790614	5790881	427	DUS3L
chr4	6642107	6642449	460	MRFAP1
chr19	10216821	10217133	-61	PPAN-P2RY11
chr16	87417271	87417501	-4	FBXO31
chr1	8939227	8939479	459	ENO1-AS1
chr15	78832606	78832941	-13	PSMA4
chr1	53685890	53686391	166	CZIB
chr4	153600989	153601244	33	TMEM154
chr7	99680388	99680516	-252
chr6	136610386	136610710	436	BCLAF1
chr16	82203698	82204002	-21	MPHOSPH6
chr3	134204887	134205169	13	CEP63
chr17	71228346	71228599	61	FAM104A
chr13	49106749	49107101	291	RCBTB2
chr11	70049162	70049527	75	FADD
chr5	148930952	148931297	-122	CSNK1A1
chr1	167905233	167905584	-69	DCAF6
chr10	71993036	71993382	-24	PPA1
chr19	38210560	38210805	-20	ZNF607
chr9	131843505	131843846	285	DOLPP1
chr1	231376798	231377020	12	C1orf131
chr9	140513167	140513480	24	ARRDC1-AS1
chr7	76178442	76178813	-31	LOC100133091
chr16	69788699	69789034	5	NOB1
chr1	160232152	160232479	3	DCAF8
chr15	23034296	23034611	-26	NIPA2
chr19	56915479	56915674	-125	ZNF583
chr15	78441553	78441814	-21	IDH3A
chr7	105925474	105925787	-201	NAMPT
chr3	42641917	42642145	-147	NKTR
chr20	5107313	5107609	-193	PCNA
chr15	49170135	49170390	-69	EID1
chr10	101945667	101945966	-30	ERLIN1
chr9	36400870	36401438	41	RNF38
chr8	141474436	141474762	-5921	TRAPPC9
chr21	44527612	44527952	-66	U2AF1L5
chr18	30050715	30051031	-28	GAREM1
chr18	12883776	12884377	160	PTPN2
chr19	46498202	46498475	-387	CCDC61
chr19	18682457	18682736	56	UBA52
chr5	133702743	133702980	1	CDKL3
chr3	196669297	196669548	-23	NCBP2
chr3	47823305	47823681	-110	SMARCC1
chr15	52311227	52311451	-47	MAPK6-DT
chr1	212208573	212209038	-90	DTL
chr22	36850896	36851237	26621	TXN2
chr1	150185782	150186113	21079	ANP32E
chr16	8715368	8715662	-40	METTL22
chr10	135379027	135379367	-59	SYCE1
chr5	179050537	179051014	-103	HNRNPH1
chr9	137000697	137001228	-242	WDR5
chr1	24104675	24105118	-12	PITHD1
chr4	148605240	148605504	9	PRMT9
chr3	196045004	196045351	-26	TM4SF19-AS1
chr17	81009654	81009873	-77	B3GNTL1
chr7	100797530	100797744	-120	AP1S1
chr13	99852836	99853254	-34	UBAC2-AS1
chr19	19516405	19516664	19922	GATAD2A
chr6	116892502	116892795	-19	RWDD1
chr5	176739366	176739690	-629	MXD3
chr22	24666577	24667192	85	SPECC1L
chr7	116502288	116502701	-147	CAPZA2
chr15	102192442	102192706	10	TM2D3
chr1	219347029	219347286	-16	LYPLAL1
chr9	71394745	71395144	-37	FAM122A
chr10	93557952	93558256	-56	TNKS2-AS1
chr17	75136720	75137101	-141	SEC14L1
chr7	92219052	92219590	42	FAM133B
chr3	196230467	196230826	-7	RNF168
chr2	27357309	27357741	18	PREB
chr7	76026716	76026976	7	ZP3
chr19	19144164	19144731	35	ARMC6
chr16	27214941	27215430	-111	KDM8
chr2	69614340	69614689	-128	GFPT1
chr16	88729624	88729848	-45	SNAI3-AS1
chr1	93250547	93250768	8	EVI5
chr19	57874600	57874907	-50	ZNF547
chr19	16308460	16308791	-97	AP1M1
chr9	132805438	132805711	-106	FNBP1
chr7	138915858	138916147	19	UBN2
chr20	17663059	17663347	-275	RRBP1
chr1	29507850	29508171	402	SRSF4
chr19	16940090	16940362	17	SIN3B
chr7	11013290	11013636	-36	PHF14
chr1	37980258	37980558	-41	MEAF6
chr17	2207048	2207371	-28	SRR
chr22	24129114	24129282	45	SMARCB1
chr21	37432697	37432948	2	SETD4
chr4	24586072	24586373	-45	DHX15
chr4	3076229	3076496	-46	HTT
chr1	211555957	211556301	32	LINC00467
chr10	14880009	14880337	14	HSPA14
chr19	14097273	14097571	19710	RFX1
chr19	8373040	8373367	39	CD320
chr18	48556505	48556705	22	SMAD4
chr13	77901132	77901389	-31	MYCBP2
chr3	38537669	38537946	-24	EXOG
chr11	67276039	67276371	-6	CDK2AP2
chr1	91966302	91966741	113	CDC7
chr20	56964033	56964339	11	VAPB
chr2	70369751	70370113	-17484	LINC01816
chr11	69490065	69490326	-74	LTO1
chr9	34126603	34126817	-14	DCAF12
chrX	135991547	135991677	-28673	RBMX
chr9	77703027	77703371	-128	NMRK1
chr10	38146446	38147034	-176	ZNF248
chr6	89790189	89790453	-149	PNRC1
chr14	39583390	39583611	12	GEMIN2
chr20	1373567	1373943	-57	FKBP1A
chr11	65101053	65101444	-75	DPF2
chr9	140117982	140118403	-1434	CYSRT1
chr3	52570352	52570585	-153	SMIM4
chr2	233415146	233415497	24	EIF4E2
chr16	30429041	30429486	1817	SNORA80C
chr9	127951991	127952287	-57	PPP6C
chr22	24407570	24407817	-61	CABIN1
chr20	25176060	25176502	-25	ENTPD6
chr17	4736410	4736760	-50	MINK1
chr17	41132765	41133108	354	RUNDC1
chr7	2598439	2598771	-1	IQCE
chr21	30391561	30391823	0	RWDD2B
chr15	64388008	64388174	-90	SNX1
chr7	128095709	128096000	-30	HILPDA
chr9	140024077	140024378	-9379	GRIN1
chr19	5904531	5904770	-233	VMAC
chr2	75185570	75185919	-26	POLE4
chr3	10183314	10183539	-36	VHL
chr14	75518041	75518331	-16	MLH3
chr1	249153105	249153503	-20	ZNF692
chr12	72079723	72079961	-20	TMEM19
chr2	61372042	61372368	2	C2orf74
chr1	228652374	228652519	2671	MIR4666A
chr10	102820622	102820859	-259	KAZALD1
chr19	10305234	10305836	94	DNMT1
chr17	7387974	7388225	414	POLR2A
chr17	27278356	27278700	8	PHF12
chr17	16438962	16439194	33440	ZNF287
chr8	41435596	41435867	12	GPAT4
chr17	74723260	74723426	431	METTL23
chr22	42017120	42017401	-39	XRCC6
chr22	50353944	50354172	-362	PIM3
chr17	26972028	26972358	-16	KIAA0100
chr2	86422480	86422804	251	IMMT
chr9	131266801	131267041	-50	GLE1
chr16	2933036	2933409	6	FLYWCH2
chr4	77997293	77997609	-309	CCNI
chr19	1407151	1407609	-205	DAZAP1
chr11	64008409	64008710	-8	FKBP2
chr3	128598165	128598615	57	ACAD9
chr19	13842412	13842706	-7	CCDC130
chr1	156710955	156711288	-241	MRPL24
chr12	109535200	109535510	-47	UNG
chr18	51750885	51751121	36	MBD2
chr7	30324158	30324417	74	ZNRF2
chr15	41099144	41099404	-13	ZFYVE19
chr2	198569882	198570206	-49	MARS2
chr1	200379100	200379380	-76	ZNF281
chr1	228270102	228270427	-97	ARF1
chr10	99205751	99206086	-14	ZDHHC16
chr15	75199080	75199419	-14	FAM219B
chr20	42939756	42940052	-62	FITM2
chr3	15643358	15643653	29	BTD
chr10	103590601	103590876	8890	KCNIP2
chr4	109094325	109094673	1223	LEF1-AS1
chr2	118943840	118944212	-64	THORLNC
chr20	35402108	35402406	-91	DSN1
chr17	57184149	57184580	-123	TRIM37
chr3	88198756	88199008	134	CGGBP1
chr20	16710403	16710689	-125	SNRPB2
chr11	64863430	64863735	-104	VPS51
chr15	62352501	62352863	-18	VPS13C
chr9	6681284	6681600	-35750	GLDC
chr7	128502668	128502977	-88	ATP6V1F
chr7	107383977	107384731	149	LOC101927974
chr1	172501900	172502278	-169	SUCO
chr5	95998530	95998773	-78	CAST
chr19	14628959	14629584	-62	DNAJB1
chr6	33560935	33561253	21	LINC00336
chr18	53090507	53090801	-1126	TCF4
chr2	178483545	178483901	-253	TTC30A
chr5	158636526	158636771	-87	RNF145
chr6	11537777	11538041	-73	TMEM170B
chr14	95623686	95623929	-48	DICER1
chr7	150671796	150672044	3482	KCNH2
chr16	75551208	75551503	17713	CHST5
chr8	145752294	145752626	-43	LRRC24
chr13	50656201	50656521	56	DLEU1
chr11	65222573	65222789	-76	LOC101927789
chr14	93799304	93799532	-36	BTBD7
chr19	13029979	13030390	-77	SYCE2
chr7	100895498	100895875	-7324	FIS1
chr11	66886325	66886764	-190	KDM2A
chr7	5821151	5821454	-8	RNF216
chr3	111697763	111697924	-30	ABHD10
chr20	57556177	57556465	10	NELFCD
chr7	12250726	12250981	-67	TMEM106B
chr3	51705077	51705363	29	TEX264
chr3	15106683	15106985	-12	MRPS25
chr20	29611491	29611718	-236	FRG1BP
chr19	40502766	40503036	-66	ZNF546
chr7	1199911	1200233	62	LOC101927021
chr9	136023871	136024105	609	RALGDS
chr3	37284597	37284835	-46	GOLGA4
chr12	131323774	131324004	-94	STX2
chr18	10525834	10526045	-85	NAPG
chr5	77072023	77072361	-7	TBCA
chr19	18391089	18391495	1140	JUND
chr7	129419972	129420216	-5240	MIR183
chr21	45759008	45759466	36	CFAP410
chr1	10490582	10490949	-39	CENPS
chr16	67875810	67876107	-265	THAP11
chr2	223520660	223520995	-16	FARSB
chr19	58898067	58898618	-117	MIR4754
chr17	7760437	7760675	653	NAA38
chr5	34008123	34008425	-119	AMACR
chr17	49337694	49338053	-34	UTP18
chr21	44313203	44313474	-81	NDUFV3
chr2	242295541	242295778	-41	FARP2
chr2	220042850	220043010	-52	CNPPD1
chr16	29801725	29802083	-130	KIF22
chr2	135676104	135676479	-101	CCNT2
chr21	38639876	38640131	-368	VPS26C
chr9	95640177	95640401	31	ZNF484
chr5	87564689	87564903	-37	TMEM161B-AS1
chr11	93394563	93394874	-130	CEP295
chr2	242673937	242674179	13	D2HGDH
chr9	128023933	128024229	-24	GAPVD1
chr16	30006894	30007182	-100	HIRIP3
chr11	18656251	18656474	-473	SPTY2D1
chr19	1592860	1593163	-147	MBD3
chr7	56131738	56132119	-51	SUMF2
chr12	108079419	108079714	-10	PWP1
chr11	6704472	6704860	-95	MRPL17
chr12	49961669	49961900	141	MCRS1
chr7	24612786	24613002	-177	MPP6
chr20	43991584	43991922	-43	SYS1
chr12	1058772	1059000	2	RAD52
chr16	30381691	30381956	-8	TBC1D10B
chr7	23145264	23145512	-16	KLHL7
chr4	140375040	140375389	-19	LOC107984036
chr11	64085396	64085723	-3	TRMT112
chr14	104387777	104387995	-20	ATP5MPL
chr10	60028729	60029045	-35	CISD1
chr12	50677277	50677510	-90	LIMA1
chr1	39338930	39339209	-4	LOC105378663
chr13	27998496	27998897	-60	GTF3A
chr9	45356920	45357140	-84855	LOC107984035
chr8	130951983	130952333	-101	FAM49B
chr16	30546156	30546486	-30	ZNF747
chr11	63706246	63706560	-71	NAA40
chr21	43429978	43430297	332	ZBTB21
chr2	240322858	240323567	82	HDAC4-AS1
chr19	17622267	17622547	-51	PGLS
chr9	133556577	133556907	-12405	EXOSC2
chr7	1094795	1095128	-45	GPR146
chr1	16939878	16940254	34	NBPF1
chr9	117349876	117350147	-38	ATP6V1G1
chr11	61197362	61197666	-67	CPSF7
chr12	122124759	122125055	-14357	MORN3
chr19	58962761	58963067	-75	ZNF324B
chr19	7701785	7702066	-71	STXBP2
chr9	128469430	128469674	-39	MAPKAP1
chr8	48872588	48872843	-19	PRKDC
chr21	34696810	34697473	-134	IFNAR1
chr2	113012500	113012758	-10	ZC3H8
chr12	124457701	124457917	47	ZNF664-RFLNA
chrX	40506695	40506808	62	CXorf38
chr14	71108001	71108200	-85	LOC101928075
chr2	264692	265053	3	ACP1
chr1	19638536	19638765	-10	AKR7A2
chr19	4909846	4910081	-193	UHRF1
chr17	79980996	79981241	-63	LRRC45
chr19	50828884	50829103	3641	KCNC3
chr12	54673733	54674174	-47	CBX5
chr19	50432608	50433100	-93	NUP62
chr3	49055377	49055666	492	DALRD3
chr11	64072605	64073061	-163	ESRRA
chr11	64884892	64885124	165	ZNHIT2
chr3	47422267	47422512	-122	PTPN23
chr6	160182792	160183198	-82	ACAT2
chr13	21347915	21348118	81	EEF1AKMT1
chr2	3522593	3523223	394	ADI1
chr22	51021366	51021680	68	CHKB-DT
chr1	212588097	212588420	-15	PACC1
chr19	49631135	49631529	8531	PPFIA3
chr18	74204770	74205049	1301	LOC101927989
chr6	43543588	43544025	6	XPO5
chr3	135914999	135915586	-115	MSL2
chr12	132568632	132568983	-21	EP400P1
chr16	88869906	88870219	-135	CDT1
chr19	47852352	47852665	-64	DHX34
chr7	156433119	156433491	-48	RNF32
chr9	37002511	37002756	31632	PAX5
chr5	150460091	150460345	377	TNIP1
chr1	197871932	197872229	320	C1orf53
chr22	26879630	26879846	11	HPS4
chr16	71917961	71918196	-3	ZNF821
chr14	53258193	53258420	19	GNPNAT1
chr2	196521649	196522014	-119	SLC39A10
chr14	35451602	35451945	-1	SRP54-AS1
chr19	5827860	5828298	4266	NRTN
chrX	16888441	16888696	-83	RBBP7
chr5	177548124	177548380	7719	N4BP3
chr12	42538414	42538906	16	GXYLT1
chr19	46234188	46234428	-154	FBXO46
chr17	48556079	48556327	-18	RSAD1
chr3	156806798	156807188	-677	LINC00881
chr7	66093808	66094049	60	KCTD7
chr6	111580408	111580678	1	MFSD4B
chr3	195474705	195474986	26996	MUC20
chr1	109756373	109757101	197	SARS
chr7	6487390	6487631	75	DAGLB
chr1	119683229	119683524	-81	WARS2
chr12	112546455	112546791	-36	NAA25
chr13	41634177	41634404	1232	ELF1
chr12	98987214	98987407	-93	SLC25A3
chr17	79650870	79651104	-33	ARL16
chr22	22652270	22652591	-33	BMS1P20
chr2	219433085	219433399	-61	CNOT9
chr19	36705917	36706189	-67	ZNF565
chr1	32253748	32253911	-23888	ADGRB2
chr6	86303511	86303768	-63	SNX14
chr12	123465108	123465519	706	ARL6IP4
chr20	3184872	3185314	235	DDRGK1
chr3	33839945	33840184	1	PDCD6IP
chr1	249200334	249200637	43	PGBD2
chr16	14164834	14165162	79	MRTFB
chr16	11349921	11350151	3	SOCS1
chr12	95467263	95467539	-7	NR2C1
chr20	32274232	32274498	-174	E2F1
chr1	226069943	226070207	5	TMEM63A
chr12	123717609	123717969	-101	MPHOSPH9
chr9	33025028	33025292	-41	DNAJA1
chr19	8509663	8509933	-61	HNRNPM
chr15	74906905	74907136	-315	CLK3
chr21	46707755	46708077	-51	LINC00205
chr13	96705537	96705905	-66	UGGT2
chr1	24829171	24829405	-38	RCAN3
chr4	25162005	25162336	-99	SEPSECS
chr1	2344045	2344521	-273	PEX10
chr4	6911391	6911678	-19	TBC1D14
chr2	190525929	190526268	-27	ASNSD1
chr20	7999728	8000005	542	TMX4
chr2	103353182	103353491	11	MFSD9
chr19	46430929	46431220	-13038	NANOS2
chr15	65822658	65822933	-6	HACD3
chr10	38299410	38299723	-12	ZNF33A
chr7	135194651	135195069	-10	CNOT4
chr16	279093	279294	255	LUC7L
chr2	42588511	42588727	-236	COX7A2L
chr10	5726441	5726818	-172	TASOR2
chr17	17739417	17739759	712	SREBF1
chr1	16678844	16679147	-20	FBXO42
chr17	47754748	47755035	568	SPOP
chr7	129592692	129592955	-23	UBE2H
chr3	14166270	14166702	46	TMEM43
chr18	9475124	9475478	-210	RALBP1
chr20	61427602	61427836	-106	MRGBP
chr20	3827270	3827564	-29	MAVS
chr19	29703992	29704217	-46	UQCRFS1
chr12	76478240	76478508	91	NAP1L1
chr17	1733061	1733347	-8	SMYD4
chr7	100472590	100472922	31	SRRT
chr7	154794977	154795310	0	PAXIP1-AS1
chr8	30891347	30891364	-483	PURG
chr19	5791136	5791400	-94	DUS3L
chr19	56165068	56165603	-81	U2AF2
chr2	202507346	202507593	-76	TMEM237
chr6	8064490	8064777	-11	BLOC1S5
chr3	40498610	40498865	-93	RPL14
chr16	89574634	89574883	-38	SPG7
chr3	183903589	183904045	-46	ABCF3
chr1	235292060	235292442	-99	TOMM20
chr12	122150434	122150823	-30	TMEM120B
chr19	42784007	42784312	-4658	CIC
chr14	77495074	77495307	-139	IRF2BPL
chr16	29937399	29937745	-25	KCTD13
chr10	124638933	124639320	-23	LOC399815
chr17	41116336	41116669	-31	AARSD1
chr19	3505950	3506310	-179	FZR1
chr19	58789870	58790119	-327	ZNF8
chr2	32288444	32288802	-57	SPAST
chr10	50747023	50747328	-6	ERCC6
chr19	28285236	28285477	-508	LINC00662
chr6	169613121	169613310	-92	LOC101929523
chr18	9913653	9914052	-161	VAPA
chr10	28821528	28821874	-7	WAC
chr20	1099062	1099332	-48	PSMF1
chr11	111957350	111957627	-8	TIMM8B
chr3	43327841	43328112	-28	SNRK
chr6	37321668	37321881	15	RNF8
chr4	185655128	185655484	-56	CENPU
chr11	73881931	73882326	-64	C2CD3
chr16	29973198	29973470	-66	TMEM219
chr5	10250274	10250773	-126	CCT5
chr20	48732514	48732685	-105	UBE2V1
chr17	74733401	74734075	155	MFSD11
chr19	1592214	1592488	513	MBD3
chr2	198317933	198318281	-40	COQ10B
chr10	81107078	81107347	-13	PPIF
chr1	229694621	229694920	-316	ABCB10
chr19	5622696	5623249	-122	SAFB
chr11	112097010	112097228	-32	PTS
chr3	52804848	52805151	-34	NEK4
chr2	112641707	112641935	-51	ANAPC1
chr6	52226761	52226972	-83	PAQR8
chr6	41040187	41040717	-99	OARD1
chr17	80415873	80416466	95	NARF
chr7	149570848	149571268	0	ATP6V0E2
chr1	20959759	20960098	-23	PINK1
chr5	78280421	78280719	563	ARSB
chr1	1051512	1051779	-176	C1orf159
chr16	88636497	88636758	-184	ZC3H18
chr7	66460483	66460699	-18	SBDS
chr20	17550580	17550808	-26	DSTN
chr9	37120320	37120565	-27	ZCCHC7
chr19	46999016	46999214	9	PNMA8B
chr1	52831734	52832062	-21	CC2D1B
chr19	58666411	58666642	-4370	ZNF329
chr11	67195789	67196044	-49	RPS6KB2
chr1	45139984	45140219	52	TMEM53
chr15	34875818	34876045	-160	GOLGA8B
chr17	27169634	27169917	33	FAM222B
chr4	128802111	128802205	110	PLK4
chr15	73075880	73076192	63	ADPGK
chr3	143690700	143690943	181	DIPK2A
chr1	46216276	46216506	-66	IPP
chr1	40915538	40915859	-38	ZFP69B
chr19	39138011	39138424	-72	ACTN4
chr11	62420650	62420887	6	INTS5
chr9	125703119	125703182	-149	RABGAP1
chr6	24667048	24667375	-52	ACOT13
chr13	95248394	95248757	-169	TGDS
chr4	1242218	1242582	518	CTBP1
chr1	23695298	23695541	-45	ZNF436-AS1
chr17	57970080	57970533	0	TUBD1
chr2	101924983	101925417	-37	RNF149
chr15	50647493	50647813	-48	GABPB1
chr16	53088718	53088949	-70	CHD9
chr14	67826562	67827232	-148	EIF2S1
chr19	7991009	7991123	-46	CTXN1
chr20	35089487	35089889	-183	DLGAP4
chr17	56084558	56084866	-5	SRSF1
chr12	102224689	102224943	-79	GNPTAB
chr2	26568744	26569100	-89	SELENOI
chr9	140082932	140083238	-43	SSNA1
chr1	54411815	54412139	4	HSPB11
chr16	3450882	3451239	5	ZSCAN32
chr19	46366250	46366622	-31	SYMPK
chr21	44299579	44299920	-50	WDR4
chr10	121632372	121632683	-132	MCMBP
chr11	65382952	65383378	-618	PCNX3
chr11	9336175	9336462	-178	TMEM41B
chr15	43663194	43663410	3	TUBGCP4
chr19	37178329	37178644	-28	ZNF567
chr3	119814476	119814596	-1242	GSK3B
chr12	106751644	106752049	-14	POLR3B
chr20	3996291	3996529	-205	RNF24
chr1	29240711	29240944	-261	EPB41
chr1	245027773	245028046	-64	HNRNPU
chr2	118771601	118771907	-108	CCDC93
chr16	2264922	2265263	-251	PGP
chr1	155658450	155658685	1	YY1AP1
chr18	51884071	51884453	-14	C18orf54
chr19	10443800	10444360	125	RAVER1
chr5	150036265	150036287	-4127	MYOZ3
chr19	2236268	2236893	-243	SF3A2
chr1	2322961	2323237	-106	MORN1
chr1	33430307	33430636	-61	RNF19B
chr19	10613318	10613629	-26	KEAP1
chr6	52535735	52535999	-44	TMEM14A
chr5	96519250	96519546	-447	RIOK2
chr3	185303806	185303998	-181	SENP2
chr11	64645960	64646189	7	MIR10392
chr8	42911411	42911669	74	FNTA
chr1	6295910	6296232	-47	ICMT
chr2	232572891	232573209	-185	PTMA
chr16	67193698	67194000	-11	FBXL8
chr10	64028423	64028643	70	RTKN2
chr15	82339245	82339579	-1053	MEX3B
chr10	133795339	133795697	-1	BNIP3
chr7	100136304	100136647	-351	AGFG2
chr6	41701936	41702223	60	TFEB
chr9	140135217	140135504	-379	TUBB4B
chr17	79885542	79885884	8	MAFG-DT
chr19	17501948	17502161	-13903	PLVAP
chr11	1330739	1331166	14	TOLLIP-AS1
chr9	134378161	134378416	-1	POMT1
chr18	71814991	71815283	-68	FBXO15
chr19	36618902	36619092	-11971	CAPNS1
chr4	54243578	54244012	-13	FIP1L1
chr19	56015076	56015379	15424	SSC5D
chr15	67813278	67813579	-28	IQCH-AS1
chr19	39339862	39340343	515	HNRNPL
chr19	50836937	50837032	-191	KCNC3
chr10	105881577	105881838	-109	SFR1
chr15	50978915	50979249	-88	TRPM7
chr2	242089651	242089946	-84	PPP1R7
chr16	58663904	58664196	-320	CNOT1
chr18	47807827	47808273	87	MBD1
chr19	15490602	15490966	-186	AKAP8
chr1	16302428	16302785	21	ZBTB17
chr12	2144172	2144470	-13197	CACNA1C-IT2
chr19	7745542	7745850	-23	TRAPPC5
chr16	23652491	23652883	-9	PALB2
chr14	51706749	51707054	-64	TMX1
chr16	87425568	87425933	-23	FBXO31
chr1	85742236	85742557	-81	BCL10
chr17	38256803	38257039	-79	NR1D1
chr8	42249110	42249532	42	VDAC3
chr3	57583069	57583400	-163	ARF4
chr1	42922069	42922391	16	PPCS
chr15	29561916	29562226	-45	NSMCE3
chr20	44718183	44718595	212	NCOA5
chr5	68389596	68389948	-69	SLC30A5
chr1	28879320	28879686	-26	TRNAU1AP
chr1	151170829	151171070	-79	PIP5K1A
chr9	99638043	99638313	6996	LOC100132781
chr1	40349074	40349329	-18	TRIT1
chr19	10206815	10207210	6321	ANGPTL6
chr5	149380086	149380368	-10	TIGD6
chr12	54674822	54675111	456	HNRNPA1
chr4	48832810	48833080	-115	OCIAD1
chr21	45209088	45209493	-168	RRP1
chr11	6255804	6256018	-45	FAM160A2
chr9	33025556	33025788	401	DNAJA1
chr8	26435231	26435494	-99	DPYSL2
chr19	11266459	11266660	-71	SPC24
chr9	20622410	20622637	-25	MLLT3
chr13	77903194	77903618	-2177	MYCBP2
chr2	70314071	70314343	-60	PCBP1-AS1
chr4	39640514	39640754	-149	SMIM14
chr18	33709183	33709526	3	SLC39A6
chr8	141467708	141467999	-10	TRAPPC9
chr2	232379065	232379413	-189	LINC00471
chr19	37808401	37808447	-360	ZNF875
chr8	30013996	30014153	189	DCTN6
chr1	53791823	53792086	1788	LRP8
chr8	29940450	29940724	-7	SARAF
chr19	44258898	44259371	-20	SMG9
chr4	174291876	174292211	-62	SAP30
chr1	43282891	43283147	49	SVBP
chr6	43692797	43693133	-37416	MRPS18A
chr19	40931946	40932144	-146	SERTAD1
chr10	35415698	35415712	-64	CREM
chr8	96281344	96281722	-104	C8orf37
chr6	35888789	35889065	30	SRPK1
chr1	32479103	32479599	-118	KHDRBS1
chr4	73935329	73935640	-8	COX18
chr19	59025413	59025646	-2097	SLC27A5
chr3	150480888	150481200	-88	SIAH2
chr19	33071850	33072228	-57	PDCD5
chr3	120068158	120068383	-69	LRRC58
chr20	34042841	34042927	-313	GDF5
chr20	44563002	44564030	194	PCIF1
chr19	2273644	2273904	4289	OAZ1
chr17	8534562	8534879	-641	MYH10
chr5	123985430	123985719	95231	ZNF608
chr2	118845870	118846072	-23	INSIG2
chr1	32671148	32671372	-12	IQCC
chr9	131873457	131873767	19	PTPA
chr2	198380598	198380861	-61	MOB4
chr1	16173890	16174454	-30	SPEN
chr4	186317386	186317835	-385	ANKRD37
chr1	179334978	179334989	-123	AXDND1
chr16	56553855	56554007	5	BBS2
chr15	69745050	69745189	-38	RPLP1
chr10	104613935	104614115	9	BORCS7
chr19	3985409	3985692	-89	EEF2
chr2	211035403	211035646	609	KANSL1L
chr4	178230866	178231137	-27	NEIL3
chr1	26758509	26758899	-69	DHDDS
chr19	40476716	40477065	-22	PSMC4
chr6	71377366	71377510	-148	SMAP1
chr10	75006655	75007094	139	DNAJC9
chr10	74856699	74856956	-95	P4HA1
chr1	17240461	17240794	-7799	CROCC
chr19	14682557	14682839	180	NDUFB7
chr2	99952538	99953111	-28	TXNDC9
chr5	162886960	162887321	-32	NUDCD2
chr1	27114309	27114591	-4	PIGV
chr8	74888145	74888565	-22	TMEM70
chr11	62623337	62623556	-89	SNHG1
chr16	66586299	66586655	-2	CKLF-CMTM1
chr16	77756357	77756593	64	NUDT7
chr18	66382258	66382537	13	TMX3
chr2	55450489	55450743	-8423	RPS27A
chr2	47797075	47797374	246	KCNK12
chr7	148725639	148725894	-169
chr5	132073172	132073512	-104	KIF3A
chr1	93646088	93646307	-76	CCDC18
chr16	89883028	89883315	-116	FANCA
chr17	79678842	79679117	-287	SLC25A10
chr22	42062692	42063040	22005	SNU13
chr7	102312104	102312397	-68	POLR2J2
chr20	30539651	30540068	-10	PDRG1
chr15	100106006	100106252	-4	MEF2A
chr17	4852169	4852427	83	PFN1
chr19	1269571	1269895	402	CIRBP
chr4	26859150	26859459	2562	STIM2-AS1
chr3	32147869	32148104	-17	GPD1L
chr4	71705545	71705762	-46	GRSF1
chr19	51611826	51611890	-192	CTU1
chr11	64053154	64053469	-9	GPR137
chr9	139010555	139010995	-54	TMEM250
chr14	64970444	64970685	-8	ZBTB25
chr11	66383895	66384510	101	RBM14
chr19	49588379	49588748	-145	SNRNP70
chr5	6633226	6633640	-120	SRD5A1
chr11	73472091	73472520	-186	RAB6A
chr19	2819681	2820001	-25	ZNF554
chr11	67056288	67056639	-311	ANKRD13D
chr12	100593184	100593485	-531	ACTR6
chr5	130599524	130599797	-42	CDC42SE2
chr19	15236457	15236738	0	ILVBL
chr6	146285417	146285699	-64	SHPRH
chr17	79849444	79849742	4	ANAPC11
chr5	179285731	179286073	-85	MRNIP
chr4	87856114	87856352	79	AFF1
chr11	62572884	62573215	-137	NXF1
chr20	3800990	3801340	-6	AP5S1
chr13	114144917	114145131	2	DCUN1D2
chr2	71295234	71295878	130	NAGK
chr22	31318125	31318410	-28	MORC2-AS1
chr15	69755106	69755230	10011	RPLP1
chr8	109260915	109261167	-95	EIF3E
chr7	140179165	140179463	-9	MKRN1
chr5	52095818	52096085	12201	ITGA1
chr4	56412985	56413294	-63	CLOCK
chr2	70056523	70056915	-73	GMCL1
chr8	146017742	146018117	-154	RPL8
chr16	84733395	84733689	-64	USP10
chr8	28196790	28197058	760	PNOC
chr8	9912022	9912428	423	MSRA
chr6	2765236	2765550	-234	WRNIP1
chr5	218160	218610	47	SDHA
chr1	28099504	28099808	-74	STX12
chr4	120987899	120988167	-30	MAD2L1
chr6	8435694	8435962	-28	SLC35B3
chr6	13574511	13574868	-72	SIRT5
chr3	128336392	128336724	33103	RPN1
chr16	3030457	3030759	-161	PKMYT1
chr3	52231925	52232133	-70	ALAS1
chr19	531408	531580	-266	CDC34
chr19	46405904	46406365	-263	MYPOP
chr17	41173731	41173796	639	VAT1
chr19	52097556	52097848	-69	LINC01530
chr19	13056404	13056779	-37	RAD23A
chr1	67519907	67520232	-238	SLC35D1
chr7	135662062	135662180	-14	LUZP6
chr10	75503898	75504131	-116	SEC24C
chr11	118230128	118230322	-90	UBE4A
chr5	176433553	176433969	19	UIMC1
chr2	61991441	61991645	89652	FAM161A
chr8	7212686	7212921	82	FAM66B
chr2	47922492	47922733	-87609	MSH6
chr17	79791096	79791368	-65	MCRIP1
chr9	131549495	131549724	77	TBC1D13
chr13	20357044	20357228	40	PSPC1
chr11	59436342	59436804	-63	PATL1
chr9	130679277	130679535	-86	ST6GALNAC4
chr9	130370661	130371053	-3699	STXBP1
chr3	157815875	157816170	7930	SHOX2
chr19	2096564	2096934	-165	IZUMO4
chr3	58292034	58292416	253	HTD2
chr2	88991037	88991239	-53	RPIA
chr16	75681493	75681800	11	TERF2IP
chr3	196159238	196159557	-99	UBXN7
chr2	122407352	122407385	138	NIFK-AS1
chr8	6565608	6565833	10	MCPH1-AS1
chr5	96518868	96519206	-86	RIOK2
chr3	12525705	12526046	-56	TSEN2
chr15	34330676	34330999	568	AVEN
chr2	96873910	96874228	-85	STARD7-AS1
chr7	6388436	6388882	-61	FAM220A
chr3	157827981	157828312	268	RSRC1
chr7	54826863	54827107	-21	LOC100996654
chr16	67694061	67694457	-96	ACD
chr1	40839155	40839515	-64	SMAP2
chr4	185746686	185746905	327	ACSL1
chr15	90293986	90294270	412	MESP1
chr2	46844025	46844298	19	PIGF
chr17	39822169	39822461	-22822	EIF1
chr3	133524439	133524817	-31	SRPRB
chr20	42839378	42839691	-66	OSER1-DT
chr7	44058680	44059026	-60	POLR2J4
chr6	117923495	117923896	-21	GOPC
chr21	40817629	40817902	-26	SH3BGR
chr10	104210121	104210455	714	RPARP-AS1
chr1	36614989	36615276	-17	TRAPPC3
chr12	64062221	64062584	-129	DPY19L2
chr3	182833845	182834141	-16618	MCCC1
chr1	33116501	33116951	-83	RBBP4
chr11	72533069	72533434	7795	ATG16L2
chr19	49617515	49617778	19	LIN7B
chr3	44379519	44380345	-12	TCAIM
chr1	1976386	1976641	4996	LOC105378591
chr14	31926615	31926826	-8	DTD2
chr17	2297044	2297269	7198	MNT
chr1	28845070	28845299	446	RCC1
chr12	6580039	6580351	-352	VAMP1
chr17	43225601	43225820	1026	HEXIM1
chr19	5720355	5720851	-45	CATSPERD
chr19	47363651	47364115	-371	ARHGAP35
chr1	93645324	93645591	513	TMED5
chr17	37793170	37793423	-37	STARD3
chr6	37786763	37787020	-612	ZFAND3
chr1	32645360	32645663	235	TXLNA
chr19	57049661	57050020	-477	ZFP28
chr11	122933039	122933296	-323	HSPA8
chr21	46237955	46238175	-21	SUMO3
chr7	104653964	104654242	485	KMT2E-AS1
chr13	99739765	99740096	953	DOCK9-DT
chr8	19674657	19674958	-120	INTS10
chr17	72772352	72772650	-17	NAT9
chr4	57302068	57302415	-185	PAICS
chr15	59225747	59226358	-174	SLTM
chr4	119757197	119757497	-66	SEC24D
chr14	89029087	89029475	-100	ZC3H14
chr12	57914460	57914715	-287	DDIT3
chr22	43253206	43253615	-131	ARFGAP3
chr11	58346140	58346456	-238	ZFP91
chr1	41444984	41445604	-74	CTPS1
chr12	121342108	121342410	-98	SPPL3
chr16	46865042	46865294	-76	C16orf87
chr13	48611896	48612201	186	NUDT15
chr19	42721783	42722196	-160	DEDD2
chr19	58874053	58874306	-62	ZNF497
chr5	14664568	14664889	-99	OTULIN
chr19	1039864	1040245	-48	ABCA7
chr11	61582596	61582920	-46	MIR1908
chr9	71650737	71651092	246	FXN
chr11	60681466	60681762	-16	TMEM109
chr19	58193196	58193473	-11	ZNF551
chr9	91925477	91925936	-404	CKS2
chr4	120133675	120133943	-10	LOC101929762
chr17	47439577	47440073	10	ZNF652
chr5	138533914	138534129	36	SIL1
chr4	110651074	110651317	31	PLA2G12A
chr4	123073335	123073606	-18288	KIAA1109
chr10	120937994	120938244	205	PRDX3
chr10	99185772	99186105	-10	PGAM1
chr17	35306031	35306321	-78	AATF
chr7	127032679	127032941	-48	ZNF800
chr3	169899161	169899723	79	PHC3
chr11	68816232	68816465	-52	TPCN2
chr17	55162335	55162628	-126	AKAP1
chr19	6199373	6199666	63841	ACSBG2
chr21	43654803	43655081	14934	ABCG1
chr20	37101188	37101529	-128	RALGAPB
chr22	19842272	19842648	-63	GNB1L
chr2	28974368	28974771	-45	PPP1CB
chr14	68066896	68067143	-1	PIGH
chr17	40896956	40897220	-30	EZH1
chr6	64345505	64345775	-67	PHF3
chr10	124713691	124714109	-157	C10orf88
chr2	131862701	131862996	428	PLEKHB2
chr7	100808854	100809164	-159	VGF
chr11	66035801	66036106	-157	RAB1B
chr12	111021093	111021431	-139	PPTC7
chr10	75531837	75532169	-31	FUT11
chr8	23103844	23104190	-137	CHMP7
chr8	11325057	11325303	-918	FAM167A
chr12	109251434	109251709	-212	SSH1
chr7	76022388	76022749	-4271	ZP3
chr17	55038024	55038239	280	COIL
chr7	111202335	111202698	32	IMMP2L
chr16	69166325	69166619	19	CHTF8
chr12	123849738	123850085	416	SBNO1-AS1
chr20	61557866	61558025	-42	DIDO1
chr11	66511982	66512289	-72	C11orf80
chr7	6049057	6049272	-34	AIMP2
chr19	1260973	1261214	-8174	CIRBP
chr14	90422118	90422398	-13	TDP1
chr15	72564897	72565239	-173	PARP6
chr20	52210927	52211307	-11481	ZNF217
chr2	239197668	239197910	-538	PER2
chr1	25664725	25664900	-13	TMEM50A
chr7	107531403	107531815	-19	DLD
chr17	33914240	33914360	-41	AP2B1
chr6	97345610	97345909	8	NDUFAF4
chr1	3773622	3774329	-65	DFFB
chr12	46384492	46384875	-326	SCAF11
chr16	89939784	89940130	-43	TCF25
chr2	114361175	114361579	-83	DDX11L2
chr16	81040407	81040667	-13	CMC2
chr19	2328436	2328822	-44	LSM7
chr17	78075100	78075455	-103	GAA
chr8	55014480	55014818	-72	LYPLA1
chr21	35747651	35747896	-6	SMIM11B
chr1	1406983	1407289	-9	ATAD3B
chr9	37422489	37422791	-53	GRHPR
chr11	76092147	76092516	-16	GVQW3
chr10	120966871	120967102	-97	GRK5
chr1	1447356	1447668	-30	ATAD3A
chr17	37356142	37356432	-249	RPL19
chr13	22245128	22245376	40	FGF9
chr2	210288584	210288678	-140	MAP2
chr19	1605345	1605644	-33	UQCR11
chr9	77643204	77643524	-18	CARNMT1
chr15	45694571	45694655	79	SPATA5L1
chr7	44080072	44080317	28	RASA4CP
chr20	25604458	25604834	4	NANP
chr15	77363328	77363578	-2	TSPAN3
chr17	67323192	67323455	-49	ABCA5
chr5	1594443	1594862	-6	SDHAP3
chr16	28835469	28835766	1248	ATXN2L
chr13	111365157	111365523	-270	ING1
chr1	76251777	76251970	-6	RABGGTB
chr1	244624482	244624676	4	CATSPERE
chr13	45492055	45492414	71372	NUFIP1
chr19	42724241	42724509	-89	DEDD2
chr10	15138962	15139535	69	RPP38
chr9	139378057	139378422	-28	SEC16A
chr1	230778127	230778586	129	COG2
chr7	129845129	129845418	-27	TMEM209
chr19	51897724	51897967	-4000	C19orf84
chr10	104408764	104409059	4659	TRIM8
chr19	19774027	19774271	336	ATP13A1
chr7	87849238	87849485	38	SRI
chr19	17633982	17634336	49	NIBAN3
chr16	78133172	78133753	-89	WWOX
chr5	98264655	98265016	-3	LOC100289230
chr1	201798145	201798403	-11	IPO9
chr16	86588688	86589091	-37	FLJ30679
chr19	57106528	57106708	-46	ZNF71
chr7	99933844	99934134	-59	PMS2P1
chr3	47554864	47555427	57	ELP6
chr21	38630563	38630651	9028	VPS26C
chr16	90038779	90039295	49	AFG3L1P
chr6	151711471	151711814	1052	ZBTB2
chr19	36605686	36606269	89	TBCB
chr19	40949149	40949368	-753	SERTAD3
chr17	38279568	38279646	1383	MSL1
chr12	56693754	56693972	251	CS
chr19	46220490	46220747	-2082	FBXO46
chr7	1067893	1068219	12	C7orf50
chr6	147524836	147524965	-594	STXBP5
chr18	54305874	54306205	-216	TXNL1
chr18	77439082	77439305	552	LOC284241
chr21	30257475	30257872	16	N6AMT1
chr3	139108407	139108665	-14	COPB2
chr11	72504651	72504919	-35	STARD10
chr3	127293776	127294024	274	MIR6825
chr19	16222083	16222487	-414	RAB8A
chr11	114271105	114271477	40	RBM7
chr17	56429609	56429923	-204	SUPT4H1
chr19	59066393	59066732	-90	CHMP2A
chr10	92631617	92631828	-9	RPP30
chr7	100303528	100303827	-67	POP7
chr13	114238668	114238965	-187	TFDP1
chr15	31618685	31619093	-149	KLF13
chr1	43232607	43233073	-80	C1orf50
chr22	41940355	41940602	-4	POLR3H
chr2	37311464	37311546	10	HEATR5B
chr3	49591659	49591940	0	BSN-DT
chr14	105282213	105282593	-5135	LINC00638
chr17	18086939	18087236	-55	ALKBH5
chr7	100888326	100888581	-91	FIS1
chr1	182808259	182808858	76	DHX9
chr19	56904804	56905153	-67	ZNF582-AS1
chr19	50887267	50888011	35	POLD1
chr1	228290893	228291203	-22	C1orf35
chr19	1074829	1075167	-1635	ARHGAP45
chr22	32072803	32072976	-14339	PISD
chr2	170430343	170430548	-14	FASTKD1
chr5	141016309	141016585	-24	HDAC3
chr3	197476632	197476853	-12	FYTTD1
chr11	62341387	62341689	-175	EEF1G
chr11	2421658	2422015	-144	TSSC4
chr19	797773	798082	475	PTBP1
chr7	105752925	105753265	-73	SYPL1
chr12	54069678	54070052	2	ATP5MC2
chr19	48837261	48837502	8125	EMP3
chr5	137089975	137090210	-40	HNRNPA0
chr2	95831401	95831635	-36	ZNF2
chr1	16971067	16971436	-818	MST1P2
chr16	67260845	67261077	-60	LRRC29
chr17	8054472	8054686	1143	PER1
chr21	46293581	46294054	1	PTTG1IP
chr12	13197243	13197485	49	FAM234B
chr1	246670487	246670826	-75	SMYD3
chr2	86667740	86668031	-609	KDM3A
chr21	35288000	35288243	-13	ATP5PO
chr2	216973756	216974180	-103	XRCC5
chr14	102226725	102226950	-73	PPP2R5C
chr13	48575280	48575596	24	SUCLA2
chr15	63340361	63340673	-171	TPM1
chr19	41816049	41816207	51	CCDC97
chrX	55187726	55187796	-133	FAM104B
chr16	66864790	66865054	-43	NAE1
chr22	50963808	50964227	16	SCO2
chr11	102323351	102323624	9	TMEM123
chr1	1259926	1260177	-11	INTS11
chr4	84205888	84206069	-30	COQ2
chr3	52273040	52273396	-36	LOC101929054
chr16	85061194	85061464	-28	KIAA0513
chr11	47788835	47789135	-92	FNBP4
chr19	48867063	48867576	-122	TMEM143
chr22	31741744	31742111	405	PATZ1
chr3	15247482	15247890	-67	CAPN7
chr16	29984807	29985159	-206	TAOK2
chr6	83775425	83775681	7	UBE3D
chr18	12377006	12377290	127	AFG3L2
chr14	76127492	76127673	-7	TTLL5
chr12	22199408	22199637	370	CMAS
chr17	28257110	28257382	0	SSH2
chr19	34895085	34895474	-24	PDCD2L
chr9	131486408	131486739	-167	ZDHHC12
chr8	61564749	61565039	-26405	CHD7
chr19	10676417	10676775	90	KRI1
chr10	99258065	99258570	49	MMS19
chr2	47748214	47748573	-6283	HCG2040054
chr22	36520069	36520339	36599	APOL3
chr19	10806426	10806708	-5548	QTRT1
chr5	139781134	139781415	-125	ANKHD1
chr21	37692198	37692428	-174	MORC3
chr1	31538593	31538915	-190	PUM1
chr19	34625299	34625543	-37988	LSM14A
chr3	186285013	186285331	-44	TBCCD1
chr1	9488860	9489139	-24	LINC02606
chr8	144450837	144450935	-81	RHPN1-AS1
chr19	11616652	11616908	-126	ZNF653
chr1	220445710	220445997	-58	RAB3GAP2
chr16	9185004	9185239	-380	C16orf72
chr2	70520449	70520740	-4	SNRPG
chr4	146540347	146540679	-24	MMAA
chr9	4741095	4741419	-55	AK3
chr3	196438943	196439328	-14	CEP19
chr19	1240180	1240497	-1412	ATP5F1D
chr2	137181107	137181370	-305513	CXCR4
chr12	49760832	49761189	322	SPATS2
chr10	121652092	121652317	-38	SEC23IP
chr19	2061376	2061610	-10250	MKNK2
chr6	159420820	159421038	290	RSPH3
chr1	246729432	246729810	-18	CNST
chr8	101965193	101965339	-45	YWHAZ
chr11	113746332	113746571	-157	USP28
chr4	3534074	3534341	-58	LRPAP1
chr5	170814421	170814822	-87	NPM1
chr15	79165006	79165316	38	MORF4L1
chr7	117854532	117854835	-10075	ANKRD7
chr3	156392144	156392384	-115	TIPARP
chr11	17099185	17099439	-98	RPS13
chr19	4007339	4007791	-169	PIAS4
chr9	33044419	33044628	19252	DNAJA1
chr1	111506493	111506756	-58	LRIF1
chr1	35734170	35734439	-6	ZMYM4
chr5	169010583	169010815	-78	SPDL1
chr15	41952462	41953057	149	MGA
chr19	40023416	40023626	-29	EID2B
chr1	227922911	227923284	15	JMJD4
chr19	4182498	4182756	-67	SIRT6
chr19	30432919	30433665	146	URI1
chr9	123964176	123964528	-205	RAB14
chr4	1722171	1722499	715	TMEM129
chr5	52405472	52405793	-40	LOC257396
chr17	47269979	47270242	16633	GNGT2
chr2	98262384	98262536	-65	COX5B
chr22	31892273	31892554	-109	SFI1
chr18	8705001	8705269	2484	GACAT2
chr17	73780742	73781057	12	UNK
chr1	21113127	21113534	-149	HP1BP3
chr16	1979647	1979969	-11392	HS3ST6
chr16	4818622	4818867	-1581	ZNF500
chr4	47465634	47465920	-30	COMMD8
chr2	20550552	20550929	5	PUM2
chr19	6393656	6394129	-717	GTF2F1
chr9	66458356	66458669	1223	LINC01410
chr3	47017773	47018215	-3	CCDC12
chr12	58087476	58087660	-170	OS9
chr16	4475594	4476039	10	DNAJA3
chr20	39946323	39946663	-17733	ZHX3
chr15	77197631	77197935	-102	SCAPER
chr16	2255480	2255946	258	MLST8
chr3	178789510	178789805	-60	ZMAT3
chr9	100684659	100685048	-1	TRMO
chr17	36714442	36714721	47624	SRCIN1
chr2	128145544	128145816	-30316	PROC
chr8	681278	681498	-164	ERICH1
chr1	25573807	25574236	-11	RSRP1
chr11	60609335	60609577	-130	CCDC86
chr8	142011373	142011698	-154	PTK2
chr2	68384839	68385151	-25	PNO1
chr7	5013525	5013753	23	RNF216P1
chr9	94877623	94877797	-15	SPTLC1
chr17	73127868	73127995	-41	NT5C
chr7	6098814	6099046	-70	EIF2AK1
chr20	62886888	62887210	1	PCMTD2
chr12	58148640	58148873	-130	2020-03-09
chr5	177659325	177659547	367	PHYKPL
chr10	99400082	99400385	-210	PI4K2A
chr6	44094999	44095339	20	MRPL14
chr6	15662504	15662759	628	DTNBP1
chr20	33999753	33999984	77	UQCC1
chr1	202858110	202858351	47	RABIF
chr8	8860230	8860468	-58	ERI1
chr1	247095100	247095702	-151	AHCTF1
chr7	108209906	108210324	35	THAP5
chr7	22862282	22862656	-1	TOMM7
chr8	30891081	30891260	-298	PURG
chr19	41035082	41035359	-1178	SPTBN4
chr1	24969487	24969818	-141	SRRM1
chr1	229406736	229407049	9	LOC105373159
chr19	5903714	5904011	-61	NDUFA11
chr7	6746387	6746752	9	ZNF12
