# Supplementary material for: MYC regulates ribosome biogenesis and mitochondrial gene expression programs through its interaction with host cell factor–1
Source: eLife. 2021 Jan 8;10:e60191. doi: 10.7554/eLife.60191 (PMC7793627; doi:10.7554/eLife.60191)
Supplement: Figure 6—source data 1. [file elife-60191-fig6-data1.xlsx]

## Sheet: Sheet1
seqnames	starts	ends	4A log2FoldChange	4A padj	VP log2FoldChange	VP padj
chr1	1243392	1244465	0.619006	0.036429	0.660451	0.0213174
chr1	2343605	2345059	0.620448	0.0149648	0.630114	0.0090832
chr1	6259147	6259852	0.730885	0.0213634	0.854682	0.00384192
chr1	9970208	9970803	0.848813	0.0297576	0.828341	0.0293861
chr1	16160878	16162660	0.663029	0.0158698	0.671011	0.0101162
chr1	23810907	23811736	1.46817	0.000278842	1.23837	0.00145462
chr1	26826345	26827697	0.623065	0.00772228	0.478738	0.0320497
chr1	28969489	28970029	0.801114	0.0173484	0.700771	0.0306384
chr1	31538200	31539008	0.819094	0.0210833	0.933702	0.0050816
chr1	33116449	33117400	0.9248	0.0149648	0.950264	0.0080373
chr1	41157063	41158301	0.854149	0.00814168	0.970605	0.000788178
chr1	43232233	43233447	0.90529	0.00333132	0.943813	0.000759702
chr1	44495528	44497220	0.67481	0.0102447	0.802674	0.000659228
chr1	45240791	45241949	0.525696	0.0126455	0.563064	0.0035023
chr1	45452065	45452573	1.2126	0.00772228	1.36135	0.000810585
chr1	46151956	46153023	0.684144	0.0320316	0.824155	0.00626781
chr1	53791709	53793423	0.624307	0.00772228	0.669702	0.00172902
chr1	70686906	70687702	0.797213	0.0448756	0.932824	0.0149215
chr1	109203574	109204321	0.771331	0.03672	0.723242	0.0465096
chr1	109642590	109643458	0.912782	0.00112082	0.672744	0.0149215
chr1	153643116	153643805	0.835441	0.0465827	0.904763	0.0272891
chr1	153939523	153940484	0.735876	0.0174016	0.700861	0.0177339
chr1	154192022	154194263	0.497741	0.022611	0.632708	0.00180147
chr1	156307581	156308766	0.62511	0.0213987	0.665974	0.0101222
chr1	166845005	166845855	0.778329	0.0401589	0.906861	0.0127116
chr1	182758406	182759033	0.678635	0.0363048	0.677179	0.0324651
chr1	205563953	205564846	0.74248	0.0220456	0.656232	0.0371115
chr1	206808290	206809226	0.678112	0.0257414	0.628431	0.0342671
chr1	212458068	212459625	0.857979	0.00823565	0.870011	0.00347765
chr1	224370073	224371571	0.67852	0.0206262	0.588082	0.0387781
chr1	228352999	228354198	0.688584	0.0256342	1.04141	0.000149654
chr1	228644887	228645575	1.14623	0.0018749	0.73398	0.0446316
chr1	228651407	228652395	0.957993	0.0250656	0.986889	0.0167546
chr1	235291523	235292474	0.791827	0.00523879	0.702278	0.00802119
chr1	244997758	244999336	0.577156	0.0173866	0.673777	0.00278973
chr1	245081807	245082763	0.763248	0.000929975	0.466317	0.0436227
chr10	5855384	5856409	0.507586	0.0222074	0.552956	0.00915301
chr10	6130502	6131504	0.885628	0.019144	0.79051	0.0303072
chr10	21784614	21785593	0.869822	0.022611	0.991593	0.00594715
chr10	38146459	38147209	1.01963	0.0110086	0.942874	0.012613
chr10	70715550	70717036	0.79908	0.000470923	0.640289	0.00356583
chr10	71992750	71993698	0.564125	0.0176126	0.545571	0.0166431
chr10	75006627	75007327	0.67989	0.0447998	0.782846	0.0166831
chr10	75935869	75937090	0.640266	0.0336434	0.723422	0.0127148
chr10	76969707	76971455	0.507362	0.0449174	0.53441	0.0309589
chr10	89621523	89623456	0.5667	0.0284478	0.554669	0.0271189
chr10	98479706	98480917	0.681787	0.00384545	0.506469	0.0252974
chr10	99257463	99258975	0.549003	0.0357817	0.540968	0.0342472
chr10	101380354	101381375	0.8207	0.0221715	0.744144	0.0327639
chr10	102106068	102107176	0.935159	0.00194961	0.835266	0.00314783
chr10	102747076	102747637	0.832884	0.0244034	1.10322	0.0011928
chr10	103892626	103893774	0.457433	0.0221715	0.442083	0.022204
chr10	103911767	103912813	0.469522	0.0280832	0.480731	0.0201105
chr10	104209429	104210893	0.513638	0.0472846	0.668846	0.00727912
chr10	104473686	104474893	0.531317	0.0276568	0.489996	0.0379677
chr10	120839541	120840564	0.807855	0.017492	0.680036	0.0403639
chr10	131908320	131910261	0.612393	0.0101229	0.560736	0.0121008
chr10	133488658	133489545	-0.342851	0.0411178	-0.514272	0.00126415
chr10	133644403	133644922	-0.544458	0.018446	-0.449974	0.0417763
chr10	134363899	134365316	0.82493	0.0201624	0.703602	0.041692
chr11	776527	777908	0.620618	0.0171881	0.527082	0.0357146
chr11	9405874	9406889	0.633408	0.0126455	0.558634	0.0196828
chr11	34074356	34075193	0.588683	0.0446311	0.644	0.0239641
chr11	47663771	47664439	0.626652	0.0357177	0.631904	0.0296286
chr11	60928449	60929296	0.665407	0.0452	0.707529	0.0293882
chr11	61061469	61062569	0.568771	0.0142296	0.497035	0.0253462
chr11	61100279	61101547	1.22738	2.73838e-05	0.806471	0.0066387
chr11	62622908	62623895	0.70867	0.00561937	0.524416	0.0323183
chr11	64084362	64086062	0.66014	0.028186	0.695838	0.0164902
chr11	66138403	66139476	0.729669	0.0139244	0.727729	0.00915301
chr11	72532728	72534008	0.574534	0.0248152	0.558884	0.0251687
chr11	73490378	73490974	0.821863	0.0401763	0.921249	0.0167535
chr11	73587377	73588155	0.653102	0.009932	0.785299	0.000483143
chr11	75110380	75110967	0.634547	0.0447998	0.756391	0.01317
chr11	88070624	88071245	0.636203	0.0357817	0.763501	0.00838736
chr11	102187909	102188635	0.811476	0.0336887	1.0437	0.00350766
chr12	6642667	6644628	0.596063	0.0142296	0.660548	0.00333545
chr12	31476850	31479357	0.56372	0.00278186	0.435357	0.0160092
chr12	31881465	31882445	0.800506	0.0377486	0.810515	0.0306063
chr12	32908024	32908852	0.736496	0.0401766	0.857476	0.0131477
chr12	53447532	53448445	0.725493	0.0322768	0.878204	0.00589542
chr12	53894575	53895440	0.826067	0.0231959	0.917532	0.00826645
chr12	54069528	54070159	0.845702	0.0221715	0.906867	0.0101079
chr12	56435518	56436510	0.889634	0.0138312	0.810941	0.0177468
chr12	57080942	57082634	0.478209	0.0458175	0.465269	0.0491667
chr12	62996086	62997140	0.849879	0.0102447	1.12044	0.000104918
chr12	64797732	64799183	0.531772	0.0384462	0.675534	0.00552229
chr12	69979033	69979791	0.521525	0.0357817	0.738888	0.00135532
chr12	109535228	109536386	0.499947	0.0447998	0.486343	0.0482992
chr12	110905960	110907324	0.739975	0.000935924	0.530039	0.0165245
chr12	111842540	111844699	0.539647	0.0221715	0.569733	0.0117875
chr12	113622369	113623848	0.635746	0.00772228	0.69404	0.0014204
chr12	124086236	124086949	0.914068	0.0164689	0.984958	0.00549839
chr12	132568408	132569137	0.815287	0.0236041	0.891742	0.009816
chr12	133136628	133138027	0.615176	0.0128106	0.588542	0.0116843
chr13	41633870	41636134	0.543666	0.00772228	0.62532	0.000679153
chr13	42845797	42846891	0.450164	0.0394871	0.932386	3.73647e-07
chr13	45150441	45152617	0.467428	0.0154341	0.559336	0.00169693
chr13	51483674	51484757	0.685215	0.0149047	0.555283	0.0414989
chr13	73301518	73302242	0.701153	0.0196422	0.977901	0.000272598
chr13	73355481	73356582	0.532367	0.0232521	0.496426	0.0304103
chr13	76123328	76124379	0.410207	0.0472846	0.666973	0.000483143
chr13	77565937	77566559	0.731256	0.0147123	0.80699	0.00351035
chr13	77600411	77601830	0.503692	0.0391216	0.751721	0.000791926
chr13	79979211	79980984	0.557056	0.00749502	0.526208	0.0061136
chr13	95248307	95248761	0.714013	0.042238	1.02936	0.00154211
chr13	115045967	115047950	0.567896	0.0422146	0.563549	0.0403301
chr14	23024816	23025754	0.561034	0.0489035	0.647623	0.0194093
chr14	23398241	23398842	0.712807	0.0417292	1.21561	9.46448e-05
chr14	23770663	23772251	0.754485	0.00772228	0.555915	0.0409711
chr14	35342395	35344830	0.569835	0.0220257	0.515531	0.0326712
chr14	35591024	35591886	0.738705	0.0173866	0.724612	0.0145951
chr14	50582899	50583540	0.805103	0.0428602	0.959394	0.0121008
chr14	91580179	91581042	0.874389	0.00989705	1.05164	0.00045822
chr14	100680127	100681186	0.624567	0.0442925	0.653319	0.0310454
chr14	104009986	104010394	-0.739352	0.0151238	-1.05773	0.00014683
chr15	25683289	25684482	0.77086	0.0221715	0.997976	0.00129156
chr15	43802830	43803643	0.805251	0.040974	0.774291	0.046215
chr15	48623474	48624716	0.737304	0.0206262	0.81511	0.00658585
chr15	50646765	50647965	0.623107	0.00644203	0.498472	0.020664
chr15	66444854	66448241	0.553895	0.0206765	0.485994	0.0362159
chr15	69109712	69111241	0.563593	0.0252153	0.5945	0.0144267
chr15	72523352	72524079	0.902949	0.0223126	0.765805	0.0490992
chr15	73075248	73076357	0.656677	0.0398254	0.801228	0.00871363
chr15	75135133	75136340	0.617852	0.0402068	0.594307	0.0446316
chr15	75493691	75495371	0.514115	0.033339	0.51749	0.0276935
chr15	85523378	85524764	0.627108	0.017492	0.688099	0.00547128
chr15	89163939	89165002	0.504373	0.0447888	0.654092	0.00616533
chr15	89181958	89182992	0.822661	0.017492	0.730431	0.0297651
chr15	91497856	91498844	0.665438	0.0306212	0.697778	0.0185903
chr15	93351733	93353012	0.624068	0.00892311	0.671013	0.00192989
chr16	1821446	1823741	0.564309	0.013564	0.635964	0.00236473
chr16	2014346	2015716	0.531498	0.0465528	0.630095	0.0150164
chr16	2801822	2803447	0.641832	0.0132244	0.799275	0.000586095
chr16	3550692	3551443	1.03833	0.0126455	0.980624	0.0124881
chr16	3766435	3767988	0.585416	0.017492	0.53462	0.0252974
chr16	4357313	4358362	0.881739	0.0243737	0.948609	0.0118483
chr16	4526166	4526634	0.929489	0.0127597	0.828512	0.0186269
chr16	12782441	12782847	-0.754258	0.0392594	-1.30701	0.000178236
chr16	21529943	21532157	0.352825	0.0465827	0.429506	0.0132574
chr16	22308389	22309373	0.609399	0.0289943	0.976605	8.90935e-05
chr16	29826845	29827698	0.753562	0.033339	0.774748	0.0241617
chr16	30886097	30886879	0.819712	0.0204087	0.753176	0.0271189
chr16	31190848	31192366	0.835192	0.000754743	0.824213	0.000346397
chr16	46917650	46918883	0.612658	0.0407002	1.04043	0.000104918
chr16	58767386	58768458	0.578493	0.041996	0.685089	0.0124935
chr16	70557380	70558228	0.658167	0.0411178	0.916881	0.00235316
chr16	87734434	87736491	0.515833	0.0245206	0.476289	0.0339117
chr16	87811291	87812004	0.768323	0.0413661	0.741717	0.0457681
chr16	87840045	87841209	0.632428	0.0411178	0.713928	0.0167642
chr16	88877572	88878763	0.54778	0.0168885	0.558623	0.0101186
chr16	89044720	89045859	0.626378	0.032685	0.635057	0.0257807
chr16	89626720	89627908	0.736909	0.00201955	0.635237	0.00507316
chr16	89752994	89754200	0.52911	0.043837	0.525873	0.0417763
chr16	89882810	89883610	0.981327	0.00780318	0.791585	0.024921
chr17	7211154	7211879	0.68161	0.0216692	0.728516	0.0100033
chr17	8126411	8127333	1.14476	0.00749502	0.842334	0.0398488
chr17	17494552	17495183	0.681231	0.048976	0.977469	0.00250674
chr17	20883607	20883991	-0.818837	0.0377486	-1.00275	0.008418
chr17	26645418	26646746	0.792626	0.00508029	0.590714	0.0280893
chr17	26684007	26684824	0.948693	0.0222074	0.961912	0.0161866
chr17	28088035	28088589	0.758085	0.0440352	0.770229	0.0362159
chr17	34890269	34891690	0.637277	0.010522	0.551268	0.0194921
chr17	35715232	35716723	0.530136	0.0236041	0.620744	0.0051134
chr17	36452532	36453259	0.630254	0.0378385	0.821856	0.00384192
chr17	37356153	37357133	0.872616	0.00648025	0.868366	0.00295418
chr17	37910005	37911166	0.65976	0.0209066	0.655081	0.0163782
chr17	40074305	40075959	0.693958	0.0102447	0.716192	0.00395211
chr17	42277065	42278080	0.97641	0.00948946	0.99654	0.00384192
chr17	48555913	48556564	0.806377	0.0231959	0.705507	0.0434606
chr17	62097364	62098372	0.690001	0.0312693	0.644285	0.0396695
chr17	63051832	63053388	0.621228	0.0476962	0.81443	0.00655697
chr17	64537446	64538710	0.602884	0.0206262	0.548178	0.0294624
chr17	65713683	65714566	0.724485	0.0447998	0.860867	0.0134418
chr17	65820854	65821664	0.83449	0.0412879	0.799138	0.0478979
chr17	66243486	66244330	0.765465	0.00561937	0.720889	0.00467242
chr17	73892295	73893215	0.646557	0.0334995	0.713495	0.0150164
chr17	73900515	73901324	0.830151	0.0477568	1.15732	0.00314783
chr17	74553667	74554336	0.64122	0.0477568	0.681659	0.0319919
chr17	74897849	74898508	-0.574116	0.0174695	-0.54648	0.0166036
chr17	75441130	75442231	0.518227	0.0418437	0.696505	0.00351035
chr17	76209987	76210666	1.05131	0.00555079	0.969708	0.00567605
chr17	79415942	79416670	-1.03497	0.000740727	-0.731235	0.00999866
chr17	79827728	79830256	0.574555	0.0154341	0.526126	0.0206695
chr17	79935137	79936111	0.803844	0.0106335	0.914084	0.00132558
chr17	80054966	80057926	0.613847	0.00159362	0.378675	0.0486184
chr18	11980415	11981556	0.576346	0.0382244	0.53956	0.0486184
chr18	12376665	12377733	0.702017	0.0131559	0.571916	0.0351055
chr18	12990958	12991824	0.822295	0.0382244	0.972719	0.0104451
chr18	19192053	19192772	0.497211	0.0448874	1.128	3.16828e-08
chr18	29671667	29673056	0.440061	0.040974	0.508901	0.0145951
chr18	45456455	45457029	1.14901	0.00333132	0.844127	0.0257867
chr18	48404952	48406549	0.6571	0.00850749	0.498745	0.0367608
chr18	76717038	76717710	-1.21017	0.00239904	-0.955846	0.0078565
chr19	1066804	1067800	0.723881	0.0336887	0.723194	0.0297659
chr19	1863832	1864907	0.574472	0.0133626	0.618298	0.00417625
chr19	5621915	5623665	0.71249	0.033339	0.857476	0.00739872
chr19	5719856	5721145	0.52933	0.0280832	0.966394	2.71212e-06
chr19	5903232	5905196	0.55992	0.0102447	0.622431	0.00171129
chr19	10946447	10947431	0.724448	0.0345731	0.894652	0.00575337
chr19	12833174	12835025	0.673715	0.00772228	0.538958	0.0251297
chr19	16697358	16698843	0.703697	0.0102447	0.563168	0.0316869
chr19	17392112	17393699	0.571508	0.0334995	0.609277	0.0195821
chr19	17403097	17403897	0.760694	0.0289943	0.938328	0.00389788
chr19	18433366	18434280	0.991023	0.00910658	1.03978	0.00272
chr19	30432704	30433991	0.636172	0.00567213	0.607208	0.00424898
chr19	34894844	34895903	0.724784	0.0116553	0.644021	0.0170495
chr19	39339623	39340752	0.52581	0.0386207	0.507308	0.0417501
chr19	41769992	41770846	0.819336	0.017492	1.08125	0.00052937
chr19	42746683	42747579	0.816674	0.0257149	0.974001	0.00458104
chr19	46194978	46196361	0.656989	0.022611	0.682072	0.014069
chr19	47633709	47634353	0.79543	0.0177951	0.880809	0.0051134
chr19	47851963	47853073	0.66515	0.0169856	0.635855	0.0165245
chr19	48824543	48825547	0.639233	0.047076	0.836512	0.00626781
chr19	49140517	49141540	0.618058	0.0222074	0.837986	0.000698821
chr19	49313842	49314554	0.683451	0.0458289	0.769238	0.0202368
chr19	49588151	49589233	0.661957	0.044881	0.685704	0.0340572
chr19	50432029	50433515	0.664485	0.0102447	0.724509	0.00203253
chr19	50887153	50888103	0.6787	0.0126455	0.575797	0.0252974
chr19	51870763	51871413	0.967841	0.0193624	0.821924	0.0414697
chr19	54693041	54694542	0.6888	0.0173866	0.796853	0.00281627
chr19	57791045	57792337	0.689601	0.0221715	0.706805	0.014682
chr2	3605472	3606845	0.487759	0.0477568	0.573014	0.0167254
chr2	20549506	20551290	0.691706	0.0109462	0.72312	0.00384192
chr2	26256219	26257390	0.752262	0.0138921	0.798309	0.00474161
chr2	27434580	27435440	0.805391	0.0245206	0.856468	0.0130214
chr2	27579071	27580227	0.531942	0.0345203	0.725193	0.00199534
chr2	32235815	32236459	0.842764	0.0173866	1.01341	0.00175008
chr2	32288373	32289365	0.992562	0.00476615	0.762462	0.0227458
chr2	32581714	32582746	0.654014	0.0329078	0.876424	0.00194586
chr2	39351042	39351777	0.65227	0.0390277	0.625293	0.0432656
chr2	48541219	48543364	0.714789	0.00508029	0.521095	0.0322317
chr2	73510537	73513609	0.404274	0.0312693	0.496938	0.0053828
chr2	75060837	75062666	0.519464	0.0119306	0.426542	0.0300713
chr2	96873848	96875029	0.696305	0.0173866	0.875518	0.00101484
chr2	96931768	96932404	0.772119	0.041996	0.743821	0.0472691
chr2	109335359	109336434	0.683434	0.0173866	0.725844	0.00716977
chr2	113012051	113012840	0.576305	0.0377486	0.73217	0.0051412
chr2	122494128	122494871	0.809494	0.00335845	0.972326	6.59964e-05
chr2	128568330	128569075	0.739232	0.0403644	0.775827	0.0270746
chr2	128848612	128849147	1.01696	0.0157037	0.989226	0.0137683
chr2	136742308	136743711	0.527393	0.0477568	0.658451	0.01047
chr2	172289680	172291428	0.795627	2.73838e-05	0.695937	0.00014683
chr2	173420238	173421775	0.777989	0.00508029	0.564735	0.0333627
chr2	178076707	178078459	0.745873	0.00772228	0.801303	0.00148291
chr2	179314880	179316240	0.654773	0.0329078	0.72585	0.0139192
chr2	196521919	196523188	0.678083	0.0172837	0.559702	0.0422646
chr2	197040374	197041539	0.706953	0.033339	0.908096	0.00343248
chr2	203499272	203500086	0.801189	0.0280482	0.716108	0.0456873
chr2	239703630	239704465	-0.740964	0.0140285	-0.889	0.00136617
chr2	241499429	241500650	0.638716	0.00333132	0.451673	0.0312023
chr20	304857	305535	0.574282	0.0169856	0.49258	0.0337708
chr20	5986373	5987135	0.958095	0.0206262	0.943496	0.0168763
chr20	17948793	17950192	0.526205	0.0172837	0.612053	0.00272631
chr20	32366084	32367107	0.883453	0.0245206	1.14312	0.00161188
chr20	32890406	32891432	0.786789	0.00722794	0.930335	0.000284397
chr20	33680253	33680882	0.733823	0.038689	0.737945	0.0334822
chr20	34541578	34542753	0.720593	0.0221715	1.03672	0.000237073
chr20	35723874	35724923	0.648859	0.0340864	0.624666	0.0371392
chr20	37062776	37064162	0.436778	0.0336491	0.486805	0.0146126
chr20	39945467	39946084	1.09637	0.0128106	1.3516	0.000564226
chr20	42086367	42087246	0.613176	0.0108178	0.497473	0.0299996
chr20	43588516	43589564	0.884936	0.00112082	0.807756	0.00169693
chr20	44717859	44719046	0.593583	0.0408364	0.643178	0.0226131
chr20	47662597	47663664	0.953933	0.000470923	0.944229	0.000149654
chr20	55972451	55973927	0.501662	0.040521	0.731333	0.00127356
chr20	62586909	62589020	0.650816	0.00772228	0.58589	0.0105185
chr20	62611479	62612778	0.593855	0.0312693	0.80337	0.00154211
chr21	34696799	34697449	0.764187	0.0279296	0.749478	0.0267681
chr21	34913788	34915538	0.568586	0.032685	0.56729	0.0280062
chr21	45079064	45080083	0.524529	0.0142296	0.547088	0.00629669
chr22	19419182	19420138	0.698329	0.0210833	0.740768	0.010099
chr22	20104299	20105780	0.544142	0.0223126	0.700455	0.00152771
chr22	21336068	21336816	0.697918	0.0445853	0.825857	0.0135899
chr22	21983021	21984777	0.439406	0.026037	0.641364	0.000374531
chr22	24235955	24237878	0.543864	0.0289943	0.550426	0.0232174
chr22	28314291	28315574	0.588586	0.032685	0.628898	0.0177389
chr22	31480687	31481422	0.627815	0.0357471	0.693725	0.0162695
chr22	32149415	32150138	0.78418	0.0311354	0.844916	0.0158314
chr22	36924788	36925692	0.684765	0.0329078	1.04263	0.000294632
chr22	41346942	41347623	0.804736	0.0446401	0.817481	0.0372324
chr22	42016161	42017878	0.546739	0.0207297	0.5431	0.0164902
chr3	13895081	13895503	-1.06791	0.00198895	-0.660105	0.0356972
chr3	31573322	31575230	0.772603	0.00772228	0.705878	0.009816
chr3	33481691	33482365	0.916883	0.0236041	0.835313	0.0352025
chr3	39447945	39448635	0.952588	0.000249563	0.925536	0.00012149
chr3	40498539	40499674	0.488671	0.0390277	0.551351	0.0159999
chr3	47421989	47423138	0.793036	0.0149648	0.799104	0.00965343
chr3	48130021	48131078	0.526013	0.0447998	0.538735	0.0362159
chr3	49058660	49060479	0.471833	0.0468525	0.569488	0.013379
chr3	49395398	49396213	0.742186	0.0465528	0.859917	0.0168763
chr3	49710621	49712317	0.625508	0.0196422	0.820482	0.000743085
chr3	51533196	51534342	0.766485	0.0173484	0.739909	0.0160092
chr3	52719491	52720608	0.554472	0.0394593	0.693284	0.00673923
chr3	127842301	127843019	0.758919	0.0422146	0.856442	0.0174084
chr3	129829259	129831124	0.50595	0.0272259	0.473269	0.0346136
chr3	130612277	130613054	0.745041	0.0411178	0.725325	0.0431502
chr3	133524501	133525025	0.717747	0.0411178	1.08939	0.000743085
chr3	135914394	135916148	0.437479	0.0465528	0.489151	0.0230343
chr3	143689727	143692006	0.653905	0.00523879	0.77931	0.000148979
chr3	156391664	156392767	0.644617	0.022611	0.672982	0.013379
chr3	160282800	160283911	0.684614	0.0173484	0.750776	0.0050816
chr3	196466554	196467399	0.729363	0.0245206	0.79986	0.0101162
chr3	197281499	197283182	0.555084	0.0223126	0.677115	0.00278973
chr4	3267858	3268269	0.848653	0.0447998	0.909739	0.0274346
chr4	17513225	17514008	0.614396	0.0353946	0.635929	0.0251687
chr4	17578618	17579374	0.748178	0.0149648	0.667235	0.0238927
chr4	37687907	37688523	0.69539	0.0465528	0.686074	0.0471164
chr4	39528824	39529687	0.639517	0.048166	0.693569	0.0283659
chr4	39699364	39699891	0.924423	0.00252468	0.744976	0.0114219
chr4	57301120	57303376	0.495766	0.0140831	0.392113	0.0457825
chr4	71704685	71705983	0.733241	0.0140285	0.659852	0.0207048
chr4	73934669	73936093	0.622918	0.0289943	0.570847	0.0415942
chr4	83349956	83352495	0.44702	0.0202826	0.46427	0.0117555
chr4	99849209	99850673	0.641278	0.0201203	0.63029	0.0166036
chr4	103997025	103998017	0.877817	0.000470923	0.749833	0.00169693
chr4	110650679	110651522	0.850963	0.0221715	0.99035	0.00440373
chr4	117569256	117569682	-0.531755	0.0384462	-0.553132	0.0257807
chr4	129208919	129209805	0.68459	0.0157037	0.873163	0.000669995
chr4	140476353	140477397	0.538574	0.043837	0.588995	0.0231823
chr4	184365123	184366433	0.776509	0.0231454	0.729614	0.0283594
chr4	185655212	185655734	0.734518	0.0261057	0.717322	0.0252978
chr5	6632646	6634112	0.47379	0.0470926	0.479937	0.0411863
chr5	10250237	10251464	0.582944	0.0174016	0.534585	0.0238927
chr5	43120601	43121711	0.57158	0.00371257	0.493426	0.0078373
chr5	61699161	61699922	0.715486	0.0257414	0.788133	0.0105185
chr5	68665061	68665812	0.715516	0.0465528	0.896345	0.00935298
chr5	96518801	96519724	0.629904	0.0465827	0.835034	0.00541838
chr5	111496386	111497113	0.738019	0.0294141	0.763636	0.0192855
chr5	126112237	126114110	0.709181	0.01172	0.628396	0.0175342
chr5	149109562	149111646	0.421066	0.0401763	0.425652	0.0337155
chr5	151150196	151152362	0.63553	0.0173866	0.559118	0.0300755
chr5	154062007	154062852	0.829826	0.0386207	0.80647	0.0400546
chr5	175963192	175964587	0.555227	0.0395774	0.635234	0.0145951
chr5	176881317	176883017	0.557547	0.0210833	0.574773	0.0130214
chr6	32163353	32163911	0.830143	0.0210833	0.873175	0.0107431
chr6	32935936	32938391	0.467867	0.0192915	0.470494	0.0138906
chr6	32939283	32940454	0.723374	0.0300118	0.658759	0.043949
chr6	33172190	33173131	0.811501	0.022585	0.754248	0.0292042
chr6	35435952	35437202	0.546712	0.0261057	0.758729	0.000782209
chr6	86351319	86353978	0.637406	0.000929975	0.426643	0.0252978
chr6	101328747	101329493	0.852517	0.0329078	0.909874	0.0176314
chr6	111279511	111280079	0.836845	0.00989705	0.691541	0.0243711
chr6	151186726	151187704	0.603836	0.0157438	0.538641	0.0252974
chr7	467579	468875	-0.642483	0.00709931	-0.545986	0.0122239
chr7	44162701	44163494	0.980932	0.0030338	0.803234	0.0111622
chr7	44887384	44888351	1.01637	0.033339	1.21531	0.00773373
chr7	55433073	55434402	0.746155	0.0240195	0.725509	0.0238111
chr7	67973904	67975109	-0.418093	0.0301341	-0.380389	0.0433599
chr7	73506904	73508218	0.69897	0.0201203	0.713996	0.0125889
chr7	76022310	76023022	0.53756	0.0447888	0.553995	0.0344602
chr7	92219014	92219923	0.764899	0.0127597	0.668859	0.0213174
chr7	96746681	96747447	0.812259	0.0139733	0.926025	0.0022071
chr7	97500927	97502042	0.479348	0.0443108	0.935947	4.48175e-06
chr7	99006092	99006757	0.83637	0.0206262	0.848569	0.0139685
chr7	99155514	99156546	0.81899	0.0149648	0.960758	0.00180147
chr7	99932877	99934384	0.780075	0.000587864	0.590286	0.0078565
chr7	100025593	100028202	0.457141	0.022611	0.565582	0.00257114
chr7	100033231	100033752	0.66016	0.0329078	0.621536	0.0400546
chr7	100449892	100450753	0.493751	0.0342768	0.501748	0.0271189
chr7	104652895	104654993	0.627052	0.0181849	0.747721	0.0024105
chr7	121035731	121036780	0.640257	0.0236041	0.554639	0.0465096
chr7	127291424	127292636	0.622818	0.0172837	0.566705	0.0234927
chr7	135242325	135243101	0.670861	0.0210833	0.885327	0.000782209
chr7	138144725	138145978	0.643863	0.0286452	0.678085	0.016603
chr7	139044018	139045420	0.652097	0.0121386	0.637084	0.00874391
chr7	148395359	148396992	0.618394	0.0149645	0.558819	0.0212387
chr7	157355160	157356823	-0.340038	0.036429	-0.351797	0.0267419
chr7	158198373	158199307	-0.593914	0.0279296	-0.515083	0.0477587
chr7	158497363	158498138	0.746866	0.0143251	0.898316	0.00126863
chr8	19674529	19675860	0.615371	0.0274754	0.656116	0.0145577
chr8	30601457	30602067	0.874653	0.0312693	1.05511	0.00572725
chr8	30891054	30891756	0.75706	0.0465528	0.765429	0.0405917
chr8	37887715	37889552	0.617059	0.0149648	0.594356	0.0142112
chr8	41435403	41436272	0.995259	0.00860588	1.1314	0.000823944
chr8	48872501	48873890	0.59175	0.033339	0.572332	0.0351055
chr8	59571832	59572642	0.67748	0.0465827	0.685192	0.0410077
chr8	67525405	67525886	0.84702	0.0472846	0.858992	0.041692
chr8	67687267	67687851	0.929409	0.0191046	0.832584	0.0297659
chr8	82192218	82193845	0.558259	0.0126455	0.512738	0.0151759
chr8	94928547	94929500	0.809695	0.0447888	0.782221	0.0497333
chr8	101734263	101735151	0.533208	0.0465528	0.827913	0.000788178
chr8	104426483	104427834	0.638161	0.0210833	0.651057	0.0137683
chr8	110551687	110552866	0.670304	0.0418461	0.651005	0.0447595
chr8	124285830	124287280	0.699619	0.0391318	0.701623	0.0337708
chr8	126441308	126443968	0.435745	0.0437886	0.439982	0.0375082
chr8	135724303	135725946	0.686235	0.0329078	0.72913	0.0187342
chr8	143640344	143642216	-0.384933	0.0113823	-0.540564	6.23626e-05
chr8	144597743	144599187	0.680531	0.0131373	0.617548	0.0175342
chr8	144699115	144699904	0.801444	0.0377486	0.960192	0.00902042
chr9	34048366	34049711	0.620898	0.0126455	0.715334	0.00149355
chr9	37485382	37486126	0.894381	0.00384545	0.663736	0.0257244
chr9	77642404	77643722	0.530735	0.0268207	0.540533	0.0195645
chr9	86594394	86596487	0.712255	0.00772228	0.690853	0.0051412
chr9	88896749	88898056	0.602964	0.0336887	0.620984	0.0251899
chr9	96927824	96929156	0.542012	0.0210833	0.624734	0.00438907
chr9	100395203	100396393	0.731595	0.00749502	0.866994	0.000294632
chr9	127623347	127624636	0.561186	0.0257414	0.505896	0.0405964
chr9	130564841	130565560	0.575969	0.0422146	0.609389	0.0271189
chr9	130677583	130679713	0.490469	0.0433345	0.561171	0.0167254
chr9	136282673	136283453	0.762097	0.0329078	1.38488	4.48175e-06
chr9	136344142	136344771	0.763445	0.0272259	0.703761	0.0371115
chr9	139257576	139258639	0.667349	0.0161079	0.572467	0.0322829
chr9	139621945	139623378	0.574371	0.0243114	0.525089	0.0346532
chr9	139685144	139686485	0.763161	0.0140285	0.760503	0.00948314
chr9	139886740	139887569	0.784682	0.017492	1.00893	0.000759702
chr9	139980183	139981586	0.613168	0.0174016	0.526063	0.0356972
chrX	1571598	1572566	0.792216	0.033339	0.876739	0.0142596
chrX	153990649	153992086	0.505719	0.0465827	0.576527	0.0195091
