# Supplementary material for: MYC regulates ribosome biogenesis and mitochondrial gene expression programs through its interaction with host cell factor–1
Source: eLife. 2021 Jan 8;10:e60191. doi: 10.7554/eLife.60191 (PMC7793627; doi:10.7554/eLife.60191)
Supplement: Figure 7—source data 1. [file elife-60191-fig7-data1.xlsx]

## Sheet: Figure 7-S1A
	WT						Δ264						4A-1						4A-2
Day	rep1	rep2	rep3	rep4	rep5	rep6	rep1	rep2	rep3	rep4	rep5	rep6	rep1	rep2	rep3	rep4	rep5	rep6	rep1	rep2	rep3	rep4	rep5	rep6
1	0	0	0	0	0	0	0	0	0	0	0	0	0	0	0	0	0	0	0	0	0	0	0	0
3	0	0	0	0	0	0	0	0	0	0	0	0	0	0	0	0	0	0	0	0	0	0	0	0
5	0	0	0	0	0	0	0	0	0	0	0	0	0	0	0	0	0	0	0	0	0	0	0	0
7	0	0	0	0	0	0	0	0	0	0	0	0	0	0	0	0	0	0	0	0	0	0	0	0
9	0	0	0	0	0	0	0	0	0	0	0	0	0	0	0	0	0	0	0	0	0	0	0	0
11	30.4	23.5	31.8	41.2	40.9	50.3	7.8	9	7.6	9.9	10.5	10.1	3.6	5.7	5.8	7.1	6.8	10.1	4.2	4.9	7.7	3.2	4.9	5
13	275.6	213.2	288.2	374	370.8	456.7	71.1	81.3	69.4	89.5	95	91.4	32.9	52	52.2	64.5	61.6	91.5	38.1	44.7	69.7	28.6	44.9	45.2
15	804.7	597.6	477	474.8	585.7	619	91.6	176.9	196.6	125.3	46.2	126.7	22.3	93.3	44.6	104.9	48.5	146.4	43.8	54.8	89	55.7	180.2	97
17	1458.6	970.2	947.6	983	1136.4	1198.2	241.2	322.8	360.4	327	120.8	319.4	43.5	266.2	127.9	270.1	226.5	256.9	113.2	144.8	229.7	150.1	329.3	253.6
19	2253.2	2340.8	1404.9	1562.6	1638.4	1558.8	409.3	619.1	662.6	515.9	319.6	518.9	195.2	483	298.5	471.1	403.7	553.5	253	314.4	434.9	350.2	681	480.3
20			2072	2067.4	2136.5	2106.7
21							543.1	653.5	772.4	671.3	452.9	740.2	184.2	654.5	383	618.9	548.7	695.9	309.4	357.7	560	453.2	857.9	644.1
23							870.9	849.1	1070.7	1038.6	755.5	898.9	247.8	840.1	572.6	867.6	742	912.4	435.9	550.2	792.3	624.5	1082	971
25							1144.3	1107.3	1179.4	1136.5	1111.5	1040.5	434.2	1110.2	735.1	1134.5	967.9	996.3	678.8	785.3	927	765.3	1158.1	1151.4
27							1301	1288.2	1352.3	1369.9	1293.2	1352.8	948.9	1390.8	932.7	1344	1303.6	1215	914.9	1001.1	1275.9	902.3	1339.3	1352.5
29							1664.2	1673.8	1650.9	1763.2	1609.6	1757	1148.5	1647	1252.7	1607.5	1609.6	1615.2	1091.4	1245	1644.3	1165.8	1597.8	1656.6
31							2044.4	2076.4	2117.1	2041.5	2100.6	2114.8	1517.1	2063.1	1473.3	2041.8	2108.4	2087.8	1381.1	1412.4	2112.5	1415.7	2045.6	2035.8
33													2018.3		1718.8				1724.4	1778.1		1709.5
35															2021				2076.5	2167.2		2051.9

## Sheet: Figure 7-S1B
	WT							Δ264						4A-1						4A-2
Day	rep1	rep2	rep3	rep4	rep5	rep6	rep7	rep1	rep2	rep3	rep4	rep5	rep6	rep1	rep2	rep3	rep4	rep5	rep6	rep1	rep2	rep3	rep4	rep5	rep6
1	0	0	0	0	0	0	0	0	0	0	0	0	0	0	0	0	0	0	0	0	0	0	0	0	0
3	0	0	0	0	0	0	0	0	0	0	0	0	0	0	0	0	0	0	0	0	0	0	0	0	0
5	0	0	0	0	0	0	0	0	0	0	0	0	0	0	0	0	0	0	0	0	0	0	0	0	0
7	0	0	0	0	0	0	0	0	0	0	0	0	0	0	0	0	0	0	0	0	0	0	0	0	0
9	0	0	0	0	0	0	0	0	0	0	0	0	0	0	0	0	0	0	0	0	0	0	0	0	0
11	14.51	17.39	17.64	14.74	17.74	16.96	15.7	16.33	17.71	15.08	19.54	13.65	15.11	13.05	16.25	14.88	15.97	14.64	19.11	15.17	16.43	13.99	15.81	16.91	16.18
13	90.47	90.34	90.82	97.43	86.83	111.82	84.65	86.71	104.72	101.48	103.24	88.13	99.81	86.11	84.52	99.87	100.1	90.69	97.57	88.61	93.69	99.99	98.16	88.27	81.74
15	208.41	205.98	203.33	217.48	196.53	201.35	189.39	202.06	206.43	201.84	192.75	204.51	203.63	209.4	212.2	197.7	205.2	212.61	188.87	207.41	203.16	205	189.16	191.16	190.62
17	307.29	300.34	306.43	304.22	307.26	316.46	304.88	173.45	172.75	178.63	174.02	177.28	187.11	179.85	175.79	171.42	170.29	173.08	170.12	177.9	165.95	174.67	175.43	186.94	176.51
19	606.24	598.23	593.08	583.82	571.86	580.82	553.35	129.96	122.19	128.04	132.7	131.85	128.6	132.52	133.02	131.6	130.13	129.05	128.4	132.12	123.58	133.84	121.04	127.09	128.66
21	932.89	905.12	786.38	706.74	701.07	796.5	704.9	85.12	88.22	84.47	94.5	80.26	91.74	90.57	85.3	89.97	84	95.79	85.49	92.82	88.09	93.73	86.13	89.36	84.89
23	1212.68	1266.49	1010.84	907.51	869.86	1046.24	910.67	26.3	28.8	24.89	29.36	25.41	29.21	31.78	25.66	28.7	27.43	20.68	22.43	36.57	23.88	32.2	22.16	27.24	26.87
25	1603.22	1594.88	1243.13	1043.64	1018.02	1169.37	1021.78	0	0	0	0	0	0	0	0	0	0	0	0	0	0	0	0	0	0
27	2033.37	2020.42	1838.78	1609.93	1603.88	1806.18	1621.64	0	0	0	0	0	0	0	0	0	0	0	0	0	0	0	0	0	0
30			2071.07			2055.5		0	0	0	0	0	0	0	0	0	0	0	0	0	0	0	0	0	0
33				2041.08	2063.99		2092.73	0	0	0	0	0	0	0	0	0	0	0	0	0	0	0	0	0	0
36								0	0	0	0	0	0	0	0	0	0	0	0	0	0	0	0	0	0
39								0	0	0	0	0	0	0	0	0	0	0	0	0	0	0	0	0	0
42								0	0	0	0	0	0	0	0	0	0	0	0	0	0	0	0	0	0
45								0	0	0	0	0	0	0	0	0	0	0	0	0	0	0	0	0	0
48								0	0	0	0	0	0	0	0	0	0	0	0	0	0	0	0	0	0
51								0	0	0	0	0	0	0	0	0	0	0	0	0	0	0	0	0	0
54								0	0	0	0	0	0	0	0	0	0	0	0	0	0	0	0	0	0
57								0	0	0	0	0	0	0	0	0	0	0	0	0	0	0	0	0	0
60								0	0	0	0	0	0	0	0	0	0	0	0	0	0	0	0	0	0
