# Supplementary material for: MYC regulates ribosome biogenesis and mitochondrial gene expression programs through its interaction with host cell factor–1
Source: eLife. 2021 Jan 8;10:e60191. doi: 10.7554/eLife.60191 (PMC7793627; doi:10.7554/eLife.60191)
Supplement: Figure 7—source data 2. [file elife-60191-fig7-data2.xlsx]

## Sheet: WT vs. 4A-1
Feature	Feature_gene_name	log2FoldChange	padj
ENSG00000145416.9	MARCH1	-0.591455	5.59815e-08
ENSG00000099785.6	MARCH2	0.272923	0.00305603
ENSG00000173926.5	MARCH3	0.415055	9.64103e-18
ENSG00000198060.5	MARCH5	0.143034	0.0331167
ENSG00000136536.10	MARCH7	-0.625337	1.98551e-21
ENSG00000180096.7	SEPT1	0.784312	8.0669e-23
ENSG00000168385.13	SEPT2	-0.15003	0.00111173
ENSG00000108387.10	SEPT4	1.88398	3.18878e-07
ENSG00000125354.18	SEPT6	0.0947596	0.0161798
ENSG00000122545.13	SEPT7	-0.674035	7.77023e-30
ENSG00000164402.9	SEPT8	-0.311664	0.00137941
ENSG00000184640.13	SEPT9	-0.0823579	0.0116376
ENSG00000138758.7	SEPT11	-0.559807	4.99464e-34
ENSG00000183291.11	SEPT15	-0.155794	0.000318163
ENSG00000121410.7	A1BG	1.08445	2.00703e-05
ENSG00000175899.10	A2M	-0.639183	0.0213604
ENSG00000128274.11	A4GALT	-0.76878	8.58774e-60
ENSG00000094914.8	AAAS	-0.126366	0.0381408
ENSG00000081760.12	AACS	0.383437	4.00117e-15
ENSG00000158122.7	AAED1	-0.986224	7.06323e-17
ENSG00000103591.8	AAGAB	-0.526322	1.57221e-16
ENSG00000115977.14	AAK1	1.13699	1.46253e-05
ENSG00000129673.5	AANAT	0.698352	0.000194348
ENSG00000090861.11	AARS	-0.131925	0.000183624
ENSG00000124608.4	AARS2	0.397913	1.77464e-12
ENSG00000266967.2	AARSD1	0.754209	0.00283599
ENSG00000157426.9	AASDH	-0.231693	0.014658
ENSG00000149313.6	AASDHPPT	-0.527137	5.17019e-10
ENSG00000008311.10	AASS	-4.97186	2.15449e-05
ENSG00000108270.6	AATF	-0.274341	3.3578e-06
ENSG00000181409.7	AATK	1.70925	0.0013073
ENSG00000165029.11	ABCA1	-0.63736	2.80622e-43
ENSG00000107331.12	ABCA2	-1.23188	3.86065e-27
ENSG00000167972.9	ABCA3	-0.94768	1.01049e-07
ENSG00000154265.11	ABCA5	0.564117	2.82495e-06
ENSG00000154262.8	ABCA6	-0.408688	2.91579e-05
ENSG00000064687.8	ABCA7	0.368282	1.41969e-18
ENSG00000154258.12	ABCA9	1.93782	6.27995e-06
ENSG00000135776.4	ABCB10	-0.267333	0.000124626
ENSG00000005471.11	ABCB4	1.95678	4.09845e-36
ENSG00000131269.11	ABCB7	-0.177131	0.018729
ENSG00000197150.8	ABCB8	0.915909	4.69365e-65
ENSG00000150967.13	ABCB9	0.6291	1.33147e-10
ENSG00000103222.14	ABCC1	0.294922	1.39743e-16
ENSG00000124574.10	ABCC10	1.03325	2.56154e-45
ENSG00000121270.11	ABCC11	2.60111	0.00154901
ENSG00000023839.6	ABCC2	1.91834	5.91667e-24
ENSG00000108846.11	ABCC3	3.73709	6.76228e-12
ENSG00000125257.9	ABCC4	-0.305442	3.49476e-06
ENSG00000114770.12	ABCC5	0.315809	1.46448e-06
ENSG00000101986.8	ABCD1	1.00057	1.11562e-39
ENSG00000173208.3	ABCD2	1.10737	0.00774753
ENSG00000117528.7	ABCD3	-0.23742	0.000350049
ENSG00000119688.16	ABCD4	0.544181	5.29889e-19
ENSG00000164163.6	ABCE1	-0.815494	6.10985e-25
ENSG00000204574.8	ABCF1	-0.307795	1.53055e-08
ENSG00000033050.3	ABCF2	-0.421989	3.14736e-19
ENSG00000161204.7	ABCF3	0.147638	0.0150502
ENSG00000160179.14	ABCG1	-0.319252	2.29358e-08
ENSG00000118777.6	ABCG2	4.24075	0.00142189
ENSG00000143994.9	ABHD1	1.07442	6.61176e-12
ENSG00000144827.4	ABHD10	-0.820972	2.77868e-28
ENSG00000106077.14	ABHD11	0.864139	1.71301e-29
ENSG00000248487.4	ABHD14A	-0.302053	0.0158149
ENSG00000114779.15	ABHD14B	-0.21506	0.00801308
ENSG00000168792.4	ABHD15	0.634904	2.4522e-23
ENSG00000204427.7	ABHD16A	0.470753	0.000863137
ENSG00000183260.5	ABHD16B	0.683262	9.97544e-09
ENSG00000129968.11	ABHD17A	0.438297	7.61199e-12
ENSG00000107362.9	ABHD17B	-0.630504	3.59569e-26
ENSG00000136379.7	ABHD17C	-1.91954	5.86981e-10
ENSG00000140526.12	ABHD2	-0.398944	1.18968e-07
ENSG00000011198.3	ABHD5	1.0783	1.09286e-20
ENSG00000163686.9	ABHD6	-0.45667	1.66526e-07
ENSG00000127220.5	ABHD8	0.239158	5.81974e-07
ENSG00000136754.12	ABI1	-0.610744	3.06883e-38
ENSG00000138443.11	ABI2	-0.184933	0.000248241
ENSG00000108798.4	ABI3	0.243354	0.00106935
ENSG00000097007.13	ABL1	-0.33138	1.05709e-06
ENSG00000143322.15	ABL2	-0.703882	7.14447e-29
ENSG00000099204.14	ABLIM1	-0.173645	5.24024e-06
ENSG00000159842.10	ABR	0.427807	9.86501e-18
ENSG00000146386.7	ABRACL	-0.717729	3.7721e-22
ENSG00000146109.3	ABT1	-0.626274	6.1136e-29
ENSG00000114626.13	ABTB1	0.455814	1.58288e-05
ENSG00000166016.4	ABTB2	1.13679	6.76985e-08
ENSG00000268948.1	AC004017.1	1.66183	0.00964528
ENSG00000268163.1	AC004076.9	3.43955	0.016239
ENSG00000005189.15	AC004381.6	0.392146	9.87016e-05
ENSG00000213888.2	AC005003.1	1.07429	2.30995e-43
ENSG00000267710.1	AC006116.20	0.891569	0.017447
ENSG00000204957.1	AC006486.1	1.03483	2.59871e-20
ENSG00000234409.4	AC006547.14	0.772477	0.0155957
ENSG00000218739.5	AC007390.5	-0.220272	0.00484649
ENSG00000268503.1	AC007421.1	1.77004	0.0434933
ENSG00000267941.1	AC008267.1	1.68093	0.0445389
ENSG00000214109.3	AC008686.1	2.1194	0.000285761
ENSG00000216895.4	AC009403.2	0.799847	1.015e-33
ENSG00000214248.2	AC010336.1	1.33556	1.43007e-15
ENSG00000226180.2	AC010536.1	0.802324	8.28048e-08
ENSG00000267216.1	AC010642.1	1.34105	1.9536e-21
ENSG00000213922.1	AC011500.1	1.7175	0.0122363
ENSG00000228835.1	AC012123.1	-4.21503	0.00270832
ENSG00000269855.1	AC012313.1	2.05307	4.68107e-08
ENSG00000268396.1	AC012485.1	2.50687	0.000707945
ENSG00000231145.1	AC013468.1	3.19428	0.0150148
ENSG00000205147.3	AC016586.1	2.27493	7.95299e-07
ENSG00000186235.6	AC016757.3	1.87893	0.0489788
ENSG00000233538.1	AC017104.2	1.79308	1.30364e-09
ENSG00000167765.3	AC018755.1	0.483413	0.0306129
ENSG00000235978.2	AC018816.3	-2.37611	0.000643153
ENSG00000268328.1	AC019206.1	1.05409	3.68681e-11
ENSG00000256530.1	AC019294.1	2.26166	6.50663e-08
ENSG00000267964.1	AC022400.2	2.61852	0.0135503
ENSG00000225885.2	AC023590.1	-1.00169	2.80041e-06
ENSG00000177340.4	AC024940.1	1.41433	5.22832e-77
ENSG00000268509.1	AC026202.1	1.66604	3.39391e-05
ENSG00000268885.1	AC026740.1	0.733015	1.22494e-06
ENSG00000268838.1	AC027228.1	2.51434	1.39651e-05
ENSG00000268798.1	AC027307.3	1.97194	2.21116e-19
ENSG00000215067.5	AC027763.2	0.866703	3.32088e-05
ENSG00000268206.1	AC061975.10	2.52846	0.0106576
ENSG00000222020.2	AC062017.1	1.35195	2.65999e-30
ENSG00000269165.1	AC069547.1	-1.66098	2.42921e-05
ENSG00000237452.2	AC074212.3	1.70306	2.08887e-05
ENSG00000269657.1	AC079210.1	2.26057	0.0063926
ENSG00000214708.4	AC090616.2	1.50838	8.89756e-05
ENSG00000203691.2	AC092811.1	-0.699583	0.0141574
ENSG00000269559.1	AC093677.1	1.362	1.22195e-10
ENSG00000228368.1	AC106873.4	1.60378	0.00689676
ENSG00000269302.1	AC110771.1	1.19505	1.13825e-21
ENSG00000176349.7	AC110781.3	0.628085	0.013153
ENSG00000269506.1	AC110792.1	1.41014	0.0386805
ENSG00000204620.2	AC115618.1	1.0383	4.31765e-11
ENSG00000268175.1	AC117395.1	1.34508	2.1396e-09
ENSG00000268367.1	AC126614.1	2.13936	0.00200117
ENSG00000216921.3	AC131097.4	1.66933	0.0197004
ENSG00000183562.2	AC131971.1	1.30457	3.76915e-24
ENSG00000268403.1	AC132192.1	1.42095	6.19111e-15
ENSG00000268218.1	AC137932.1	-1.00999	6.75261e-08
ENSG00000269563.1	AC138655.1	1.20317	8.37258e-06
ENSG00000267270.1	AC139100.2	1.3459	3.3605e-18
ENSG00000269529.1	AC140061.12	3.37669	0.0361461
ENSG00000060971.13	ACAA1	0.385951	1.06763e-06
ENSG00000167315.13	ACAA2	-0.333315	1.62754e-12
ENSG00000076555.11	ACACB	-0.26629	2.0869e-06
ENSG00000111271.10	ACAD10	0.550689	6.46323e-21
ENSG00000177646.13	ACAD9	0.61276	1.08328e-26
ENSG00000117054.9	ACADM	-0.574757	3.08243e-36
ENSG00000122971.4	ACADS	-2.57575	4.06383e-30
ENSG00000196177.8	ACADSB	0.401854	1.43351e-06
ENSG00000072778.15	ACADVL	0.414708	8.69112e-17
ENSG00000072818.7	ACAP1	-0.207518	8.78853e-08
ENSG00000114331.8	ACAP2	-0.212818	5.18722e-05
ENSG00000131584.14	ACAP3	0.612787	5.18589e-26
ENSG00000075239.9	ACAT1	-0.33278	5.67295e-06
ENSG00000120437.7	ACAT2	-0.453979	2.27067e-11
ENSG00000181513.10	ACBD4	0.412814	5.50526e-12
ENSG00000107897.14	ACBD5	-0.363394	1.91955e-08
ENSG00000135847.5	ACBD6	-0.995772	1.03314e-80
ENSG00000102977.9	ACD	0.407551	2.91165e-15
ENSG00000159640.10	ACE	-0.447434	0.000840558
ENSG00000177076.4	ACER2	0.784327	1.62377e-07
ENSG00000078124.7	ACER3	-0.466029	1.71735e-09
ENSG00000087085.9	ACHE	1.05945	4.31988e-12
ENSG00000100813.10	ACIN1	-0.157458	0.000908312
ENSG00000144648.10	ACKR2	0.984532	1.09409e-08
ENSG00000131473.12	ACLY	-0.319779	1.44199e-25
ENSG00000153086.9	ACMSD	0.926507	0.0192391
ENSG00000196636.7	ACN9	-0.32044	8.99006e-06
ENSG00000122729.14	ACO1	0.204077	0.0156324
ENSG00000172497.4	ACOT12	2.6216	0.000516538
ENSG00000112304.6	ACOT13	-0.278834	0.000178861
ENSG00000119673.10	ACOT2	0.331119	0.000721448
ENSG00000161533.7	ACOX1	0.288608	6.63271e-06
ENSG00000087008.11	ACOX3	0.45659	1.39117e-12
ENSG00000153093.14	ACOXL	-0.871704	1.99795e-07
ENSG00000143727.11	ACP1	-0.388071	6.4027e-15
ENSG00000134575.5	ACP2	1.05653	6.69712e-28
ENSG00000102575.6	ACP5	1.01907	0.00850704
ENSG00000111644.3	ACRBP	1.60078	1.92766e-24
ENSG00000147174.7	ACRC	1.43938	7.78013e-36
ENSG00000151726.9	ACSL1	-0.140795	0.00982849
ENSG00000123983.9	ACSL3	-0.841631	7.63895e-43
ENSG00000068366.15	ACSL4	-0.446582	9.70046e-11
ENSG00000005187.7	ACSM3	0.764237	0.000109858
ENSG00000154930.10	ACSS1	0.368707	6.94087e-14
ENSG00000131069.15	ACSS2	-0.568801	4.17739e-06
ENSG00000143632.10	ACTA1	1.69566	0.00459991
ENSG00000107796.8	ACTA2	0.972097	0.0376352
ENSG00000184009.5	ACTG1	0.233921	1.12568e-10
ENSG00000182584.4	ACTL10	0.986971	1.30274e-41
ENSG00000136518.12	ACTL6A	-0.231421	1.15734e-06
ENSG00000130402.7	ACTN4	0.346685	2.53472e-11
ENSG00000131966.9	ACTR10	-0.491519	3.86881e-11
ENSG00000138107.7	ACTR1A	-0.66281	3.64635e-53
ENSG00000115073.6	ACTR1B	-0.125061	0.000823017
ENSG00000138071.9	ACTR2	-0.293158	1.94113e-05
ENSG00000115091.7	ACTR3	-0.561119	6.36393e-34
ENSG00000133627.13	ACTR3B	0.667739	7.29948e-25
ENSG00000101442.8	ACTR5	0.227519	0.00305922
ENSG00000075089.5	ACTR6	-0.455757	3.7937e-06
ENSG00000184378.2	ACTRT3	1.64669	4.53291e-19
ENSG00000135503.8	ACVR1B	-0.691886	7.09315e-09
ENSG00000121989.10	ACVR2A	-0.782202	0.00116947
ENSG00000114739.9	ACVR2B	-0.268258	0.000153847
ENSG00000243989.3	ACY1	0.849522	0.000120787
ENSG00000170634.8	ACYP2	0.775884	5.99769e-48
ENSG00000196839.8	ADA	-0.350189	8.81816e-22
ENSG00000073670.9	ADAM11	1.32999	7.55036e-20
ENSG00000148848.10	ADAM12	-4.11209	0.000492104
ENSG00000143537.9	ADAM15	0.10105	0.0423738
ENSG00000151694.8	ADAM17	-0.384566	3.05598e-25
ENSG00000135074.11	ADAM19	-0.647803	1.28492e-38
ENSG00000134007.3	ADAM20	0.895561	0.0221593
ENSG00000008277.10	ADAM22	0.325386	9.83634e-09
ENSG00000114948.8	ADAM23	0.638895	3.347e-17
ENSG00000042980.8	ADAM28	-4.71678	0.000157163
ENSG00000151651.11	ADAM8	-0.48291	5.4606e-05
ENSG00000168615.7	ADAM9	-0.565652	1.4501e-32
ENSG00000154734.10	ADAMTS1	-4.22856	0.00117728
ENSG00000160323.14	ADAMTS13	1.7304	1.0598e-155
ENSG00000156140.4	ADAMTS3	-5.38848	4.08553e-06
ENSG00000136378.10	ADAMTS7	1.22133	0.00200991
ENSG00000163638.9	ADAMTS9	-2.14449	0.0300703
ENSG00000156218.8	ADAMTSL3	2.65394	0.00366502
ENSG00000143382.9	ADAMTSL4	1.26631	1.63682e-07
ENSG00000203804.3	ADAMTSL4-AS1	1.6482	6.71894e-15
ENSG00000105963.9	ADAP1	1.55532	2.42743e-05
ENSG00000184060.6	ADAP2	1.30696	0.000188255
ENSG00000160710.11	ADAR	-0.341659	1.45231e-19
ENSG00000065457.6	ADAT1	0.47061	3.60736e-17
ENSG00000189007.11	ADAT2	0.334495	1.46454e-07
ENSG00000213638.4	ADAT3	0.626556	9.22234e-05
ENSG00000142920.12	ADC	1.24555	4.50698e-08
ENSG00000063761.11	ADCK1	0.497461	0.000705661
ENSG00000133597.5	ADCK2	-0.293068	4.5933e-06
ENSG00000163050.12	ADCK3	0.300691	2.3166e-11
ENSG00000123815.7	ADCK4	0.184466	0.00190687
ENSG00000173137.7	ADCK5	0.783641	3.79603e-46
ENSG00000138031.10	ADCY3	0.146877	0.00831009
ENSG00000121281.8	ADCY7	1.14134	7.30025e-117
ENSG00000155897.5	ADCY8	-3.28585	0.0209424
ENSG00000162104.5	ADCY9	1.55032	2.81384e-49
ENSG00000087274.12	ADD1	-0.25703	1.68622e-11
ENSG00000148700.9	ADD3	-0.60855	2.61054e-29
ENSG00000197894.6	ADH5	-0.416568	5.07588e-11
ENSG00000147576.11	ADHFE1	1.6598	7.73866e-07
ENSG00000182551.9	ADI1	-1.33195	1.38915e-48
ENSG00000159346.8	ADIPOR1	-0.148211	0.00282516
ENSG00000006831.9	ADIPOR2	-0.707356	1.46659e-45
ENSG00000156110.9	ADK	0.626638	3.87647e-28
ENSG00000148926.5	ADM	0.533808	2.50696e-08
ENSG00000128165.7	ADM2	1.12812	2.80699e-40
ENSG00000101126.11	ADNP	-1.02931	1.73104e-88
ENSG00000163485.11	ADORA1	-3.02294	0.0274511
ENSG00000128271.15	ADORA2A	0.529786	0.0028852
ENSG00000159322.13	ADPGK	-0.678162	1.28384e-35
ENSG00000144843.7	ADPRH	-3.64504	0.0101679
ENSG00000153531.8	ADPRHL1	0.703971	2.0372e-07
ENSG00000116863.10	ADPRHL2	-0.6334	9.01907e-21
ENSG00000169252.4	ADRB2	1.31123	2.25251e-29
ENSG00000173020.6	ADRBK1	-0.445676	8.89126e-36
ENSG00000100077.10	ADRBK2	-0.57903	4.36571e-27
ENSG00000239900.7	ADSL	-0.326454	1.15643e-06
ENSG00000035687.9	ADSS	0.12687	0.0367665
ENSG00000185100.6	ADSSL1	0.599601	9.94785e-05
ENSG00000259003.1	AE000662.92	0.827059	2.51315e-05
ENSG00000139154.10	AEBP2	0.749379	1.89519e-25
ENSG00000181026.13	AEN	-1.09793	3.30094e-113
ENSG00000104964.10	AES	0.355973	0.00322458
ENSG00000215346.3	AF131215.5	1.04237	3.62211e-17
ENSG00000169129.10	AFAP1L2	-0.447656	0.00752729
ENSG00000172493.16	AFF1	0.46608	2.12259e-17
ENSG00000155966.9	AFF2	-0.164843	0.000255739
ENSG00000144218.14	AFF3	0.306816	4.15081e-09
ENSG00000072364.8	AFF4	-0.425901	1.02813e-20
ENSG00000141385.5	AFG3L2	-0.688235	1.01793e-31
ENSG00000183077.11	AFMID	0.321231	0.000193801
ENSG00000119844.10	AFTPH	-0.732726	1.21291e-39
ENSG00000157985.13	AGAP1	-1.82203	0.0467026
ENSG00000133612.14	AGAP3	-0.192608	0.00547784
ENSG00000204149.5	AGAP6	0.441039	5.06395e-06
ENSG00000165923.11	AGBL2	1.59596	3.52742e-23
ENSG00000146856.10	AGBL3	1.1081	6.73958e-46
ENSG00000204305.9	AGER	1.24258	1.59566e-24
ENSG00000173744.13	AGFG1	-0.368789	1.41164e-11
ENSG00000106351.8	AGFG2	0.158476	0.0159138
ENSG00000164252.8	AGGF1	-0.370212	3.52447e-11
ENSG00000006530.11	AGK	-0.79618	2.82244e-09
ENSG00000162688.11	AGL	-0.430745	2.06824e-12
ENSG00000126070.14	AGO3	0.451582	8.67596e-23
ENSG00000134698.10	AGO4	-0.290449	1.23245e-06
ENSG00000204310.6	AGPAT1	0.695099	8.19775e-16
ENSG00000169692.8	AGPAT2	-0.186243	0.00160123
ENSG00000160216.14	AGPAT3	-0.13504	0.0250727
ENSG00000155189.7	AGPAT5	-0.135551	0.0103767
ENSG00000158669.7	AGPAT6	-0.540892	7.28352e-38
ENSG00000018510.8	AGPS	-0.356976	4.32708e-12
ENSG00000106541.7	AGR2	3.415	3.95152e-07
ENSG00000188157.9	AGRN	0.478286	1.106e-07
ENSG00000159723.4	AGRP	0.725206	0.0449859
ENSG00000135744.7	AGT	-5.25845	3.85644e-06
ENSG00000135049.11	AGTPBP1	-0.662594	8.45755e-21
ENSG00000177674.11	AGTRAP	-0.845757	5.76729e-15
ENSG00000153207.10	AHCTF1	-0.592608	1.78453e-48
ENSG00000168710.13	AHCYL1	-0.34963	7.50346e-05
ENSG00000158467.12	AHCYL2	0.449685	3.00579e-10
ENSG00000126705.9	AHDC1	0.501372	4.56233e-08
ENSG00000135541.16	AHI1	0.452984	3.62491e-09
ENSG00000185567.6	AHNAK2	2.16014	8.35734e-06
ENSG00000063438.12	AHRR	1.06178	0.00405182
ENSG00000173209.18	AHSA2	0.46082	3.70785e-24
ENSG00000111732.6	AICDA	-1.08941	3.4653e-93
ENSG00000156709.9	AIFM1	-0.484127	4.92555e-15
ENSG00000042286.10	AIFM2	0.582435	5.9423e-06
ENSG00000183773.11	AIFM3	1.51624	1.41287e-05
ENSG00000146416.12	AIG1	-3.20945	3.39683e-05
ENSG00000112297.10	AIM1	-0.375064	6.65294e-27
ENSG00000176092.9	AIM1L	-0.476579	0.0308144
ENSG00000106305.5	AIMP2	-0.560153	1.04663e-16
ENSG00000110711.5	AIP	-0.155539	0.000653511
ENSG00000160224.12	AIRE	1.20033	0.00024784
ENSG00000106992.13	AK1	1.74125	3.85253e-10
ENSG00000004455.12	AK2	-0.372005	1.50623e-20
ENSG00000147853.12	AK3	0.379184	1.26454e-11
ENSG00000165695.5	AK8	2.34853	5.51075e-05
ENSG00000023516.7	AKAP11	-0.470511	6.47481e-17
ENSG00000131016.12	AKAP12	0.920426	0.0328276
ENSG00000170776.15	AKAP13	-0.282026	3.53399e-15
ENSG00000197976.6	AKAP17A	0.427606	1.05837e-17
ENSG00000241978.5	AKAP2	0.704416	4.42992e-11
ENSG00000111254.3	AKAP3	0.848111	1.5583e-05
ENSG00000105127.4	AKAP8	-0.325297	2.42085e-11
ENSG00000166452.7	AKIP1	-1.47794	1.67296e-38
ENSG00000174574.11	AKIRIN1	-0.528213	1.81475e-18
ENSG00000135334.8	AKIRIN2	0.326699	4.12129e-07
ENSG00000117448.9	AKR1A1	-0.154668	0.00121316
ENSG00000085662.9	AKR1B1	-0.280826	1.45551e-09
ENSG00000198074.5	AKR1B10	7.6292	1.81475e-18
ENSG00000187134.8	AKR1C1	7.13904	5.28205e-11
ENSG00000151632.12	AKR1C2	6.70871	2.23042e-27
ENSG00000196139.7	AKR1C3	6.44219	2.31788e-13
ENSG00000122787.10	AKR1D1	2.45107	7.55736e-12
ENSG00000162482.4	AKR7A3	0.924235	0.0165529
ENSG00000142208.11	AKT1	0.201362	0.00124624
ENSG00000204673.6	AKT1S1	0.724302	1.30133e-29
ENSG00000105221.12	AKT2	0.643287	2.94961e-69
ENSG00000166971.12	AKTIP	-0.145491	0.0130744
ENSG00000223474.2	AL020996.1	1.45456	1.52034e-07
ENSG00000268275.1	AL035588.1	-3.52999	0.025803
ENSG00000224997.1	AL049840.1	1.29997	7.33181e-22
ENSG00000269407.1	AL096677.1	1.32457	1.06408e-05
ENSG00000267848.1	AL118506.1	1.3236	7.19936e-05
ENSG00000268466.1	AL132989.1	1.09966	0.011856
ENSG00000215306.1	AL135998.1	1.35421	0.00039839
ENSG00000212673.1	AL136115.1	-0.866707	0.0213953
ENSG00000253459.3	AL139099.1	1.65541	8.21004e-21
ENSG00000268457.1	AL160175.1	1.62829	1.36708e-09
ENSG00000212670.1	AL161915.1	-0.695997	0.0104442
ENSG00000268578.1	AL354718.1	1.00202	1.18047e-09
ENSG00000224474.2	AL355490.1	0.954671	0.000761525
ENSG00000248835.2	AL357673.1	-0.482796	0.000909429
ENSG00000203286.4	AL365202.1	1.14116	0.0144383
ENSG00000268172.1	AL590452.1	0.683615	0.0466794
ENSG00000269620.1	AL590560.1	3.36869	0.0211416
ENSG00000232850.1	AL590708.2	1.02203	1.69072e-06
ENSG00000269337.1	AL591479.1	0.906697	4.41982e-13
ENSG00000231360.2	AL592284.1	0.712799	8.84688e-05
ENSG00000215014.3	AL645728.1	1.55891	3.19592e-29
ENSG00000268996.1	AL807752.1	1.19334	2.01314e-14
ENSG00000023330.10	ALAS1	-0.269436	1.92256e-06
ENSG00000158578.14	ALAS2	1.44779	0.00794987
ENSG00000170017.8	ALCAM	-0.369274	3.38698e-12
ENSG00000059573.4	ALDH18A1	-0.708892	1.04244e-59
ENSG00000165092.8	ALDH1A1	7.59988	1.34098e-56
ENSG00000108602.13	ALDH3A1	4.86161	1.32041e-25
ENSG00000072210.14	ALDH3A2	-0.19656	0.0361959
ENSG00000006534.11	ALDH3B1	0.550334	0.00059914
ENSG00000112294.8	ALDH5A1	-0.3967	2.93793e-27
ENSG00000143149.8	ALDH9A1	-0.773216	1.20337e-37
ENSG00000149925.12	ALDOA	0.0913093	0.0327539
ENSG00000109107.9	ALDOC	0.538656	1.52828e-09
ENSG00000033011.7	ALG1	0.289859	0.00061303
ENSG00000139133.2	ALG10	-0.44966	0.000595291
ENSG00000175548.4	ALG10B	0.284967	0.00890275
ENSG00000101901.6	ALG13	0.688927	2.64324e-31
ENSG00000172339.9	ALG14	-0.402513	0.0213644
ENSG00000119523.8	ALG2	0.230277	2.20102e-05
ENSG00000120697.4	ALG5	-0.549462	8.19028e-09
ENSG00000088035.11	ALG6	-0.438431	1.12493e-07
ENSG00000159063.8	ALG8	-0.41284	8.60328e-09
ENSG00000100601.5	ALKBH1	-0.628804	1.05348e-10
ENSG00000189046.6	ALKBH2	-1.61472	1.44388e-156
ENSG00000166199.8	ALKBH3	-0.550519	0.000837038
ENSG00000160993.3	ALKBH4	1.2238	1.45876e-57
ENSG00000091542.8	ALKBH5	-0.38657	4.70728e-16
ENSG00000137760.10	ALKBH8	-0.848963	1.93323e-18
ENSG00000116127.13	ALMS1	0.337148	9.96273e-11
ENSG00000108839.7	ALOX12	1.32109	9.99581e-09
ENSG00000179477.5	ALOX12B	1.02035	0.0035027
ENSG00000012779.6	ALOX5	0.450611	3.6948e-25
ENSG00000132965.5	ALOX5AP	-1.11485	6.52513e-42
ENSG00000073331.13	ALPK1	-0.454726	1.38987e-18
ENSG00000136383.6	ALPK3	0.998381	0.00168852
ENSG00000155749.8	ALS2CR12	1.56194	4.41465e-06
ENSG00000183684.6	ALYREF	-0.137513	0.0384041
ENSG00000242110.3	AMACR	0.791289	5.30254e-11
ENSG00000178522.10	AMBN	0.805537	4.1929e-05
ENSG00000110497.10	AMBRA1	-0.263933	1.58842e-06
ENSG00000123505.10	AMD1	-0.299273	1.14301e-11
ENSG00000162066.10	AMDHD2	1.16915	3.90248e-36
ENSG00000184675.5	AMER1	-0.30806	1.33607e-05
ENSG00000159461.10	AMFR	-0.555969	1.18825e-34
ENSG00000104899.4	AMH	2.07082	4.78266e-34
ENSG00000160593.13	AMICA1	0.213973	0.00097014
ENSG00000181754.6	AMIGO1	2.9637	3.07849e-11
ENSG00000139211.5	AMIGO2	4.07399	2.7487e-06
ENSG00000101935.5	AMMECR1	-0.130294	0.00350301
ENSG00000144233.5	AMMECR1L	-0.909958	1.27425e-44
ENSG00000166126.6	AMN	0.357251	8.29004e-10
ENSG00000151743.6	AMN1	-0.455966	0.00492859
ENSG00000126016.9	AMOT	-1.9382	0.0151145
ENSG00000133805.11	AMPD3	-0.33402	2.22106e-07
ENSG00000145020.10	AMT	0.779395	1.86801e-15
ENSG00000240038.2	AMY2B	1.21275	3.35913e-15
ENSG00000174945.9	AMZ1	0.323227	0.00103184
ENSG00000196704.7	AMZ2	-0.625678	1.03911e-34
ENSG00000153107.7	ANAPC1	-0.546232	1.1065e-22
ENSG00000129055.8	ANAPC13	-0.467185	2.23423e-07
ENSG00000110200.4	ANAPC15	0.305211	0.000382407
ENSG00000166295.4	ANAPC16	-0.216469	0.00055047
ENSG00000176248.7	ANAPC2	0.763227	3.31089e-45
ENSG00000053900.6	ANAPC4	-0.177197	0.021068
ENSG00000136859.5	ANGPTL2	-1.08019	0.015792
ENSG00000187151.3	ANGPTL5	1.68115	0.0371595
ENSG00000130812.6	ANGPTL6	0.630603	4.31988e-12
ENSG00000029534.15	ANK1	-0.900603	4.54782e-49
ENSG00000145362.12	ANK2	-0.213683	0.00114368
ENSG00000151687.10	ANKAR	0.530272	0.000803305
ENSG00000166839.12	ANKDD1A	0.360389	0.0170492
ENSG00000189045.9	ANKDD1B	1.34839	0.0287853
ENSG00000132623.11	ANKEF1	-0.991794	1.62049e-17
ENSG00000185722.12	ANKFY1	0.289552	8.93702e-09
ENSG00000154122.8	ANKH	-0.179812	0.0016761
ENSG00000001629.5	ANKIB1	0.165663	0.000244067
ENSG00000160117.10	ANKLE1	0.144896	0.00937855
ENSG00000176915.10	ANKLE2	0.118507	0.00866419
ENSG00000144504.11	ANKMY1	0.476605	2.06604e-17
ENSG00000106524.4	ANKMY2	-1.01444	1.09553e-20
ENSG00000164331.5	ANKRA2	0.300467	0.000823278
ENSG00000088448.10	ANKRD10	0.355951	2.16572e-16
ENSG00000167522.10	ANKRD11	0.27172	2.1347e-05
ENSG00000101745.11	ANKRD12	-0.369656	1.7152e-12
ENSG00000076513.12	ANKRD13A	-0.831346	2.73155e-61
ENSG00000198720.8	ANKRD13B	0.403481	6.52352e-06
ENSG00000118454.8	ANKRD13C	0.239152	5.76685e-06
ENSG00000172932.10	ANKRD13D	0.377966	3.08149e-14
ENSG00000134461.11	ANKRD16	0.206868	0.00514911
ENSG00000196774.3	ANKRD20A1	1.36454	0.0127542
ENSG00000183148.5	ANKRD20A2	1.80411	4.33168e-07
ENSG00000132498.7	ANKRD20A3	1.21546	0.0360123
ENSG00000172014.11	ANKRD20A4	0.85177	0.00306599
ENSG00000089847.8	ANKRD24	1.53073	4.87031e-20
ENSG00000105186.10	ANKRD27	-0.847269	4.57397e-49
ENSG00000206560.6	ANKRD28	-0.899127	3.54256e-86
ENSG00000163046.11	ANKRD30BL	2.62256	3.27645e-17
ENSG00000164236.7	ANKRD33B	1.3173	4.07063e-49
ENSG00000181039.7	ANKRD34A	0.717561	1.05434e-10
ENSG00000135976.12	ANKRD36	0.80666	1.49465e-29
ENSG00000174501.10	ANKRD36C	1.05749	1.59995e-23
ENSG00000186352.4	ANKRD37	1.03006	2.56787e-49
ENSG00000213337.4	ANKRD39	0.582964	3.11269e-05
ENSG00000154945.6	ANKRD40	-0.805944	4.09068e-39
ENSG00000137494.9	ANKRD42	0.456453	4.29489e-06
ENSG00000186106.7	ANKRD46	0.222679	0.00293545
ENSG00000168876.4	ANKRD49	-0.474341	5.94255e-07
ENSG00000151458.7	ANKRD50	0.26953	0.000772569
ENSG00000139645.9	ANKRD52	0.420048	4.9692e-18
ENSG00000144031.7	ANKRD53	1.46925	7.8908e-05
ENSG00000100124.8	ANKRD54	-0.161866	0.040431
ENSG00000235098.4	ANKRD65	2.28223	0.0165703
ENSG00000106013.8	ANKRD7	0.220668	0.0322604
ENSG00000185046.14	ANKS1B	0.596336	1.72264e-08
ENSG00000168096.10	ANKS3	0.549048	9.83051e-15
ENSG00000165138.12	ANKS6	-0.371256	2.91437e-06
ENSG00000163516.9	ANKZF1	0.167408	0.000296772
ENSG00000011426.6	ANLN	-0.706341	1.29204e-31
ENSG00000177119.11	ANO6	-0.468566	1.66697e-18
ENSG00000074855.6	ANO8	0.745393	1.69757e-28
ENSG00000185101.8	ANO9	0.662741	2.79075e-31
ENSG00000140350.11	ANP32A	-0.456321	3.50424e-27
ENSG00000136938.8	ANP32B	0.462593	4.45941e-14
ENSG00000143401.10	ANP32E	-0.682396	1.43142e-40
ENSG00000135046.9	ANXA1	1.81327	2.85788e-11
ENSG00000122359.13	ANXA11	0.231647	6.54998e-07
ENSG00000182718.12	ANXA2	1.48657	4.15059e-81
ENSG00000177721.3	ANXA2R	0.779429	2.16888e-22
ENSG00000138772.8	ANXA3	3.64399	0.0194791
ENSG00000196975.10	ANXA4	1.91856	6.17147e-11
ENSG00000197043.9	ANXA6	-0.843331	7.92444e-14
ENSG00000138279.11	ANXA7	-0.499369	3.38435e-13
ENSG00000143412.5	ANXA9	0.601957	0.00362768
ENSG00000131480.4	AOC2	1.20291	8.81066e-24
ENSG00000131471.2	AOC3	0.284622	3.70904e-05
ENSG00000218537.1	AP000350.4	1.30594	4.47112e-30
ENSG00000173727.7	AP000769.1	0.982079	1.02703e-30
ENSG00000235878.4	AP001468.1	1.32053	0.000194882
ENSG00000268856.1	AP001579.1	1.41206	9.17921e-05
ENSG00000228120.2	AP001631.10	1.12087	1.18091e-09
ENSG00000254614.1	AP003068.23	0.728408	9.39279e-06
ENSG00000187066.4	AP003068.6	1.29196	1.01783e-07
ENSG00000269089.1	AP003733.1	1.6736	1.24807e-20
ENSG00000255284.1	AP006621.5	0.773721	4.00592e-32
ENSG00000138660.7	AP1AR	-0.436531	1.08663e-16
ENSG00000100280.12	AP1B1	0.158548	0.000115169
ENSG00000166747.8	AP1G1	-0.534852	7.40305e-20
ENSG00000213983.7	AP1G2	0.503648	1.12231e-20
ENSG00000106367.9	AP1S1	0.267865	1.19236e-06
ENSG00000182287.9	AP1S2	-0.255352	0.000115358
ENSG00000152056.12	AP1S3	1.19448	2.17127e-14
ENSG00000196961.8	AP2A1	0.282004	7.7971e-11
ENSG00000183020.9	AP2A2	0.138813	0.0171314
ENSG00000132842.9	AP3B1	-0.245547	2.76269e-05
ENSG00000103723.8	AP3B2	1.82775	2.60141e-25
ENSG00000065000.11	AP3D1	0.0926156	0.0308144
ENSG00000070718.7	AP3M2	-0.367115	1.39881e-05
ENSG00000134262.8	AP4B1	0.260347	0.00167887
ENSG00000081014.6	AP4E1	-0.384967	5.05567e-13
ENSG00000221838.5	AP4M1	0.580771	2.59923e-15
ENSG00000100478.10	AP4S1	0.337041	1.98365e-05
ENSG00000254470.2	AP5B1	0.462743	8.08402e-14
ENSG00000242802.2	AP5Z1	0.421711	8.27888e-16
ENSG00000011132.7	APBA3	0.781832	3.30433e-37
ENSG00000166313.14	APBB1	-0.43123	6.28176e-05
ENSG00000134982.12	APC	-0.865438	2.81346e-48
ENSG00000115266.7	APC2	0.615673	5.29842e-24
ENSG00000154856.8	APCDD1	-3.7419	0.0112843
ENSG00000164062.8	APEH	0.237521	8.72696e-06
ENSG00000100823.7	APEX1	0.168302	0.0147428
ENSG00000169188.4	APEX2	-0.643637	1.30883e-15
ENSG00000117362.8	APH1A	-0.45532	6.83371e-20
ENSG00000138613.9	APH1B	-0.289477	1.90325e-05
ENSG00000166181.8	API5	-0.309036	1.29933e-09
ENSG00000149089.8	APIP	-1.14323	8.40074e-32
ENSG00000169621.5	APLF	0.617912	2.36384e-14
ENSG00000163382.7	APOA1BP	-0.148454	0.0199177
ENSG00000179750.11	APOBEC3B	-0.976066	3.16373e-10
ENSG00000244509.3	APOBEC3C	-0.927393	1.35354e-14
ENSG00000243811.3	APOBEC3D	-0.790146	2.29525e-11
ENSG00000239713.3	APOBEC3G	-0.61323	4.78686e-20
ENSG00000130203.5	APOE	1.83285	1.1017e-19
ENSG00000175336.8	APOF	1.06243	4.56233e-08
ENSG00000100342.16	APOL1	1.24578	9.34234e-14
ENSG00000128335.9	APOL2	-0.25858	0.000127822
ENSG00000128284.15	APOL3	-0.255698	0.00289219
ENSG00000221963.5	APOL6	-0.493147	1.33403e-36
ENSG00000178878.8	APOLD1	0.384702	9.72109e-11
ENSG00000204444.6	APOM	1.0484	3.28e-13
ENSG00000184831.9	APOO	-0.50313	0.00423729
ENSG00000155008.9	APOOL	0.380678	0.0104328
ENSG00000256053.3	APOPT1	-0.462766	1.24075e-07
ENSG00000142192.16	APP	-0.801878	0.0003148
ENSG00000062725.5	APPBP2	-0.662457	1.22742e-24
ENSG00000157500.6	APPL1	-0.524389	2.90843e-17
ENSG00000136044.7	APPL2	0.194338	0.00258564
ENSG00000178301.3	AQP11	1.23746	0.00676562
ENSG00000165272.10	AQP3	-0.580847	6.82405e-26
ENSG00000171885.9	AQP4	-6.1954	2.44645e-08
ENSG00000021776.6	AQR	-0.428524	1.85634e-10
ENSG00000078061.8	ARAF	-0.419531	1.12528e-11
ENSG00000186635.10	ARAP1	0.50805	1.16819e-34
ENSG00000047365.7	ARAP2	-0.496007	9.7537e-17
ENSG00000198576.2	ARC	-4.2884	0.000335391
ENSG00000095139.9	ARCN1	-0.591109	2.19604e-26
ENSG00000119682.12	AREL1	-0.354411	1.72988e-07
ENSG00000143761.9	ARF1	0.237356	4.41999e-07
ENSG00000134287.5	ARF3	-0.176329	0.00874271
ENSG00000168374.6	ARF4	0.229963	8.41365e-05
ENSG00000004059.6	ARF5	-0.305638	1.83203e-11
ENSG00000165527.5	ARF6	-0.292423	0.000110856
ENSG00000066777.4	ARFGEF1	-0.405931	5.88293e-19
ENSG00000124198.8	ARFGEF2	-0.147779	0.00196393
ENSG00000164144.10	ARFIP1	-0.484581	1.07752e-10
ENSG00000132254.8	ARFIP2	-0.13924	0.0330139
ENSG00000081181.3	ARG2	-0.261133	0.00371989
ENSG00000134884.9	ARGLU1	0.559716	4.83318e-32
ENSG00000198826.6	ARHGAP11A	-0.724903	1.42879e-48
ENSG00000187951.6	ARHGAP11B	0.257329	1.62997e-05
ENSG00000165322.13	ARHGAP12	-0.237305	0.0039689
ENSG00000075884.8	ARHGAP15	-0.293596	1.07508e-06
ENSG00000140750.12	ARHGAP17	1.11107	2.96697e-19
ENSG00000146376.6	ARHGAP18	-2.73517	2.51413e-40
ENSG00000213390.6	ARHGAP19	-1.2353	1.01131e-80
ENSG00000107863.12	ARHGAP21	-2.69841	8.85777e-11
ENSG00000225485.3	ARHGAP23	-1.29956	1.79044e-12
ENSG00000163219.7	ARHGAP25	-0.451021	3.77795e-11
ENSG00000145819.11	ARHGAP26	0.75503	4.67885e-42
ENSG00000159314.7	ARHGAP27	1.36265	1.08974e-121
ENSG00000186517.9	ARHGAP30	-0.548112	1.45876e-56
ENSG00000031081.6	ARHGAP31	-1.54841	0.000147405
ENSG00000004777.14	ARHGAP33	1.07954	2.51058e-81
ENSG00000160007.13	ARHGAP35	-0.480624	4.44784e-57
ENSG00000147799.7	ARHGAP39	1.23386	6.18216e-38
ENSG00000089820.11	ARHGAP4	0.281405	4.4061e-09
ENSG00000100852.8	ARHGAP5	-2.14115	8.04869e-130
ENSG00000141522.7	ARHGDIA	0.679354	8.43042e-33
ENSG00000111348.4	ARHGDIB	-0.56688	3.81836e-50
ENSG00000076928.13	ARHGEF1	0.263879	7.4358e-14
ENSG00000104728.11	ARHGEF10	1.21758	0.000261107
ENSG00000132694.14	ARHGEF11	-0.793794	0.030299
ENSG00000110237.3	ARHGEF17	-1.56116	0.00501537
ENSG00000104880.13	ARHGEF18	-1.12019	5.41711e-90
ENSG00000142632.12	ARHGEF19	0.420689	4.84598e-09
ENSG00000240771.2	ARHGEF25	-2.2313	0.0018818
ENSG00000214944.5	ARHGEF28	3.474	4.57437e-07
ENSG00000163947.7	ARHGEF3	-1.72348	8.62654e-34
ENSG00000183111.7	ARHGEF37	1.38172	2.92635e-05
ENSG00000165801.5	ARHGEF40	-1.10797	0.0326065
ENSG00000129675.11	ARHGEF6	-0.829168	1.55495e-63
ENSG00000102606.13	ARHGEF7	-0.515211	3.90227e-25
ENSG00000131089.9	ARHGEF9	1.03645	1.2888e-104
ENSG00000117713.13	ARID1A	0.642091	2.55839e-24
ENSG00000049618.17	ARID1B	0.531827	6.13152e-15
ENSG00000189079.11	ARID2	-0.49583	2.3048e-23
ENSG00000116017.6	ARID3A	-0.474196	2.46229e-23
ENSG00000205143.2	ARID3C	1.29812	2.74476e-07
ENSG00000032219.14	ARID4A	-0.554086	1.06532e-15
ENSG00000054267.16	ARID4B	-0.189372	0.00033415
ENSG00000196843.11	ARID5A	0.301255	4.61594e-07
ENSG00000150347.10	ARID5B	-0.654896	5.39368e-27
ENSG00000166233.8	ARIH1	-0.755646	2.61492e-38
ENSG00000177479.15	ARIH2	-0.349305	4.39057e-12
ENSG00000221883.2	ARIH2OS	1.55556	6.00399e-61
ENSG00000120805.9	ARL1	-0.315745	1.14101e-05
ENSG00000175414.6	ARL10	1.35093	2.96941e-10
ENSG00000152213.3	ARL11	-0.856144	7.06323e-17
ENSG00000152219.4	ARL14EP	-0.917244	2.37154e-55
ENSG00000185305.6	ARL15	-0.637355	2.58062e-20
ENSG00000102931.3	ARL2BP	0.236284	2.8378e-06
ENSG00000138175.8	ARL3	-0.408301	4.64948e-08
ENSG00000175906.4	ARL4D	-1.10574	0.00566735
ENSG00000162980.12	ARL5A	0.151031	0.00245466
ENSG00000165997.4	ARL5B	-0.664788	1.99007e-26
ENSG00000113966.5	ARL6	-0.283058	0.0466467
ENSG00000170540.10	ARL6IP1	-0.441932	1.8574e-12
ENSG00000182196.9	ARL6IP4	1.11155	1.60555e-09
ENSG00000144746.6	ARL6IP5	-0.69805	2.04926e-13
ENSG00000177917.6	ARL6IP6	-0.0754009	0.0428892
ENSG00000143862.3	ARL8A	-0.231035	0.00619347
ENSG00000134108.8	ARL8B	-0.324008	5.12327e-07
ENSG00000196503.2	ARL9	-6.61569	1.1349e-09
ENSG00000104442.5	ARMC1	-0.608054	2.11976e-18
ENSG00000157343.4	ARMC12	0.669926	0.00295691
ENSG00000105676.9	ARMC6	-0.355309	1.1287e-13
ENSG00000125449.2	ARMC7	0.394439	7.57814e-06
ENSG00000126947.7	ARMCX1	-3.29719	0.0304257
ENSG00000198960.6	ARMCX6	0.34682	0.000848083
ENSG00000172379.14	ARNT2	-2.15215	0.0132713
ENSG00000029153.10	ARNTL2	-0.37578	0.000134947
ENSG00000241685.4	ARPC1A	-0.515044	1.47079e-31
ENSG00000130429.8	ARPC1B	-0.665345	1.14643e-69
ENSG00000163466.11	ARPC2	-0.175599	2.29401e-05
ENSG00000111229.11	ARPC3	-0.548977	3.51219e-18
ENSG00000241553.8	ARPC4	-0.647784	2.97019e-32
ENSG00000120500.13	ARR3	1.39599	7.0118e-07
ENSG00000197070.9	ARRDC1	0.388176	8.63274e-16
ENSG00000105643.5	ARRDC2	0.283742	1.3824e-07
ENSG00000113369.4	ARRDC3	0.777785	1.67967e-21
ENSG00000100299.13	ARSA	0.60214	1.00132e-17
ENSG00000113273.11	ARSB	0.406478	7.14004e-08
ENSG00000141337.8	ARSG	0.64916	1.87721e-21
ENSG00000164291.12	ARSK	0.214235	0.0432878
ENSG00000117407.12	ARTN	1.91663	5.8825e-08
ENSG00000173409.9	ARV1	-0.574675	9.18395e-09
ENSG00000099889.9	ARVCF	0.307053	0.0005613
ENSG00000104763.13	ASAH1	-0.477892	3.38825e-15
ENSG00000088280.14	ASAP3	2.5291	8.76246e-164
ENSG00000065802.7	ASB1	0.30418	4.78202e-10
ENSG00000196372.8	ASB13	-2.2477	9.10616e-220
ENSG00000161664.2	ASB16	1.07857	1.65156e-05
ENSG00000100628.7	ASB2	-1.34532	1.51527e-51
ENSG00000164122.4	ASB5	4.25023	0.0153721
ENSG00000148331.7	ASB6	0.265428	0.00018201
ENSG00000183475.8	ASB7	-1.36239	5.09143e-68
ENSG00000177981.6	ASB8	-0.629285	1.36818e-16
ENSG00000138303.13	ASCC1	-0.311139	1.76647e-07
ENSG00000112249.9	ASCC3	-0.470092	1.22116e-15
ENSG00000139352.3	ASCL1	-4.79682	6.81175e-05
ENSG00000111875.7	ASF1A	-0.715084	3.53854e-28
ENSG00000105011.4	ASF1B	-0.176467	1.07144e-06
ENSG00000116539.6	ASH1L	0.146678	0.00874969
ENSG00000213199.3	ASIC3	1.95372	1.12305e-92
ENSG00000072182.8	ASIC4	2.57322	2.25573e-15
ENSG00000101440.5	ASIP	0.838566	0.0213563
ENSG00000126522.12	ASL	1.00098	5.77599e-68
ENSG00000169093.10	ASMTL	0.338306	1.42933e-08
ENSG00000198356.7	ASNA1	-0.152896	0.0442753
ENSG00000070669.12	ASNS	-0.436175	8.13201e-39
ENSG00000138381.5	ASNSD1	-0.835247	6.99707e-33
ENSG00000204653.5	ASPDH	1.14926	1.34034e-07
ENSG00000174939.6	ASPHD1	1.73847	0.00495287
ENSG00000128203.6	ASPHD2	-0.505655	1.54831e-15
ENSG00000066279.12	ASPM	-1.23402	2.89319e-190
ENSG00000106819.7	ASPN	1.05851	0.00254457
ENSG00000169696.11	ASPSCR1	0.529327	1.03294e-25
ENSG00000130707.13	ASS1	-0.194443	0.00387722
ENSG00000188886.3	ASTL	1.98596	3.82845e-07
ENSG00000152092.11	ASTN1	-4.00108	0.00244051
ENSG00000064102.10	ASUN	-0.949212	6.67185e-32
ENSG00000171456.12	ASXL1	-0.183638	7.85176e-06
ENSG00000143970.12	ASXL2	0.34357	1.69942e-14
ENSG00000154438.3	ASZ1	0.520823	1.94514e-09
ENSG00000138138.9	ATAD1	-0.278235	4.63209e-05
ENSG00000156802.8	ATAD2	-0.547289	1.63005e-27
ENSG00000119778.10	ATAD2B	-0.167731	0.00323504
ENSG00000160072.15	ATAD3B	0.406918	4.17475e-17
ENSG00000215915.5	ATAD3C	1.4858	0.000472478
ENSG00000137343.13	ATAT1	0.824607	8.68724e-15
ENSG00000167654.13	ATCAY	-3.53728	0.0142515
ENSG00000107669.13	ATE1	-0.185852	0.00621859
ENSG00000123268.4	ATF1	-0.469518	8.33272e-11
ENSG00000115966.12	ATF2	-0.447933	4.01041e-09
ENSG00000162772.12	ATF3	0.635703	5.76395e-27
ENSG00000128272.10	ATF4	-0.0787831	0.0139825
ENSG00000169136.4	ATF5	0.258553	0.0010078
ENSG00000118217.5	ATF6	-0.284286	1.52047e-05
ENSG00000213676.6	ATF6B	0.243719	4.2539e-06
ENSG00000171681.8	ATF7IP	-0.226479	6.38429e-05
ENSG00000166669.9	ATF7IP2	1.10629	4.17293e-28
ENSG00000152348.11	ATG10	0.766807	2.51701e-16
ENSG00000145782.8	ATG12	-0.463296	2.365e-08
ENSG00000175224.12	ATG13	-0.445252	4.38367e-15
ENSG00000126775.8	ATG14	0.660376	7.18822e-12
ENSG00000168010.6	ATG16L2	0.681058	2.06664e-45
ENSG00000110046.8	ATG2A	0.785603	6.30059e-54
ENSG00000066739.7	ATG2B	-0.300486	2.33883e-09
ENSG00000144848.6	ATG3	-0.919278	4.28524e-41
ENSG00000101844.13	ATG4A	-0.442801	0.000898567
ENSG00000168397.12	ATG4B	-0.181886	4.52562e-05
ENSG00000125703.10	ATG4C	-0.516689	1.28536e-06
ENSG00000130734.5	ATG4D	-0.170345	0.000765155
ENSG00000057663.8	ATG5	-0.805915	2.63471e-28
ENSG00000197548.8	ATG7	0.989511	4.42267e-31
ENSG00000198925.6	ATG9A	0.418259	6.88065e-25
ENSG00000181652.14	ATG9B	1.31527	0.000223101
ENSG00000142102.11	ATHL1	-1.48791	1.14274e-73
ENSG00000198513.7	ATL1	-0.728548	0.000992228
ENSG00000184743.8	ATL3	-0.56088	5.87657e-13
ENSG00000149311.13	ATM	0.146663	0.0134213
ENSG00000166454.5	ATMIN	-0.650574	3.1005e-23
ENSG00000111676.10	ATN1	1.10491	8.12175e-27
ENSG00000177556.7	ATOX1	0.292902	3.19642e-05
ENSG00000145246.9	ATP10D	-0.377012	1.28687e-06
ENSG00000058063.11	ATP11B	-0.499334	8.92742e-32
ENSG00000101974.10	ATP11C	0.145533	0.00127354
ENSG00000105726.12	ATP13A1	0.527077	2.83347e-19
ENSG00000133657.10	ATP13A3	-0.429401	3.98779e-18
ENSG00000105409.11	ATP1A3	0.61721	1.01781e-24
ENSG00000129244.4	ATP1B2	-2.54302	0.000570988
ENSG00000069849.6	ATP1B3	-0.132642	0.00655155
ENSG00000196296.9	ATP2A1	1.03508	7.66027e-19
ENSG00000174437.12	ATP2A2	0.526608	6.41032e-31
ENSG00000074370.13	ATP2A3	0.484007	4.4839e-20
ENSG00000067842.13	ATP2B3	3.36885	0.00251774
ENSG00000058668.10	ATP2B4	1.02397	1.14267e-19
ENSG00000017260.15	ATP2C1	-0.30424	6.7235e-09
ENSG00000105675.4	ATP4A	2.69868	1.02212e-13
ENSG00000152234.11	ATP5A1	-0.614105	3.36517e-33
ENSG00000110955.4	ATP5B	-0.382434	5.66129e-18
ENSG00000165629.15	ATP5C1	-0.397371	1.20041e-10
ENSG00000099624.3	ATP5D	0.856456	1.1854e-38
ENSG00000116459.6	ATP5F1	-0.644512	2.2891e-29
ENSG00000135390.13	ATP5G2	-0.311918	1.85476e-10
ENSG00000154518.5	ATP5G3	-0.102506	0.016886
ENSG00000167863.7	ATP5H	-0.408107	5.19124e-09
ENSG00000169020.5	ATP5I	0.308726	1.05817e-06
ENSG00000154723.8	ATP5J	-0.232818	0.000358414
ENSG00000241468.3	ATP5J2	-0.204933	0.000121404
ENSG00000167283.3	ATP5L	-0.204378	0.0018818
ENSG00000241837.2	ATP5O	-0.40384	1.34118e-09
ENSG00000125375.10	ATP5S	-0.338826	4.85598e-05
ENSG00000105341.14	ATP5SL	-0.406898	1.3623e-10
ENSG00000071553.12	ATP6AP1	0.266419	2.33997e-06
ENSG00000182220.9	ATP6AP2	-0.571002	4.27647e-11
ENSG00000033627.10	ATP6V0A1	1.54521	5.28708e-78
ENSG00000185344.9	ATP6V0A2	-0.515555	2.65539e-26
ENSG00000117410.9	ATP6V0B	-0.204625	1.29684e-05
ENSG00000185883.6	ATP6V0C	1.54911	2.84185e-12
ENSG00000113732.4	ATP6V0E1	-0.238489	8.79614e-05
ENSG00000171130.13	ATP6V0E2	-0.429127	2.3193e-13
ENSG00000114573.5	ATP6V1A	-0.915327	2.60857e-22
ENSG00000155097.7	ATP6V1C1	-0.357144	1.40159e-07
ENSG00000131100.8	ATP6V1E1	-0.16409	0.0209257
ENSG00000128524.4	ATP6V1F	-0.188542	0.0024618
ENSG00000136888.6	ATP6V1G1	0.401907	9.11469e-15
ENSG00000151418.7	ATP6V1G3	1.38484	0.0120722
ENSG00000165240.13	ATP7A	-0.253186	0.0135981
ENSG00000123191.9	ATP7B	-0.782233	0.00205871
ENSG00000081923.6	ATP8B1	0.796928	9.14142e-07
ENSG00000143515.12	ATP8B2	0.327712	0.00335018
ENSG00000130270.12	ATP8B3	0.662242	1.99509e-06
ENSG00000166377.15	ATP9B	0.256478	0.000479611
ENSG00000175054.10	ATR	-0.191014	0.00674896
ENSG00000138085.12	ATRAID	-0.567009	7.00367e-14
ENSG00000164053.13	ATRIP	0.942598	1.678e-30
ENSG00000107518.12	ATRNL1	0.411704	4.66822e-13
ENSG00000085224.16	ATRX	-0.102473	0.0277934
ENSG00000124788.13	ATXN1	-2.71479	0.00101128
ENSG00000130638.11	ATXN10	-0.093646	0.0285292
ENSG00000224470.3	ATXN1L	-0.442604	1.29727e-13
ENSG00000204842.10	ATXN2	0.688652	1.27356e-19
ENSG00000168488.14	ATXN2L	0.616163	7.56081e-26
ENSG00000163635.13	ATXN7	0.383866	1.24169e-08
ENSG00000146776.10	ATXN7L1	0.261754	0.00670984
ENSG00000087152.11	ATXN7L3	-0.209239	8.48608e-07
ENSG00000253719.2	ATXN7L3B	-0.138396	0.00253897
ENSG00000148090.7	AUH	0.587317	1.97374e-20
ENSG00000127423.6	AUNIP	-0.217501	0.0479652
ENSG00000087586.13	AURKA	-2.14058	1.49244e-233
ENSG00000175756.9	AURKAIP1	0.349234	2.56346e-14
ENSG00000178999.8	AURKB	-0.67012	2.95831e-50
ENSG00000105146.8	AURKC	1.37092	0.0174257
ENSG00000158321.11	AUTS2	1.22717	1.8544e-168
ENSG00000169857.3	AVEN	0.287943	0.00750527
ENSG00000135407.6	AVIL	1.64511	1.14442e-64
ENSG00000105778.13	AVL9	-0.532244	7.52358e-32
ENSG00000126895.9	AVPR2	0.471576	0.0153662
ENSG00000162779.16	AXDND1	0.875548	0.005343
ENSG00000103126.10	AXIN1	-0.189924	0.00108092
ENSG00000168646.8	AXIN2	0.542452	0.000477976
ENSG00000167601.7	AXL	1.99806	6.19933e-12
ENSG00000160862.8	AZGP1	1.37874	6.29537e-06
ENSG00000141577.9	AZI1	0.631732	1.71486e-21
ENSG00000155096.9	AZIN1	-0.679638	2.84315e-35
ENSG00000166710.13	B2M	-0.546229	2.17141e-18
ENSG00000162885.8	B3GALNT2	0.142975	0.0425263
ENSG00000235863.2	B3GALT4	0.303311	0.000680534
ENSG00000176022.3	B3GALT6	0.301319	0.000268682
ENSG00000187676.7	B3GALTL	-0.811558	2.68422e-07
ENSG00000112309.6	B3GAT2	-2.7003	0.00712663
ENSG00000149541.5	B3GAT3	-0.120033	0.0285368
ENSG00000174684.6	B3GNT1	-0.339395	0.000123126
ENSG00000170340.10	B3GNT2	-1.35143	5.87993e-39
ENSG00000176383.8	B3GNT4	0.868002	0.00189516
ENSG00000156966.6	B3GNT7	0.86026	1.08935e-05
ENSG00000177191.2	B3GNT8	0.651214	0.033152
ENSG00000237172.3	B3GNT9	0.504852	0.004411
ENSG00000175711.4	B3GNTL1	0.229094	0.00256935
ENSG00000135454.9	B4GALNT1	0.374162	0.00017429
ENSG00000182272.7	B4GALNT4	-2.19622	0.00229091
ENSG00000086062.8	B4GALT1	-0.816732	1.27519e-50
ENSG00000117411.12	B4GALT2	-0.406532	1.28563e-07
ENSG00000158850.10	B4GALT3	-0.830273	1.21638e-78
ENSG00000121578.8	B4GALT4	0.335457	0.000362814
ENSG00000158470.5	B4GALT5	-1.6597	1.66469e-35
ENSG00000027847.9	B4GALT7	0.334381	1.10761e-09
ENSG00000108641.10	B9D1	0.395002	0.025221
ENSG00000123810.3	B9D2	0.970706	4.46867e-11
ENSG00000164929.12	BAALC	-3.74068	8.7138e-05
ENSG00000105393.11	BABAM1	-0.226905	0.00154531
ENSG00000156273.11	BACH1	-0.26097	2.72541e-05
ENSG00000112182.10	BACH2	-0.115274	0.000990437
ENSG00000107262.12	BAG1	-0.157753	0.00884586
ENSG00000151929.5	BAG3	1.54688	7.16485e-16
ENSG00000156735.6	BAG4	-0.52654	3.90735e-14
ENSG00000166170.9	BAG5	-0.570914	1.02667e-33
ENSG00000140320.7	BAHD1	-0.623757	3.89601e-14
ENSG00000181790.6	BAI1	1.21972	3.15495e-19
ENSG00000121753.8	BAI2	-1.21703	8.34055e-17
ENSG00000175866.11	BAIAP2	1.19161	1.4134e-39
ENSG00000006453.9	BAIAP2L1	0.460968	0.0048089
ENSG00000128298.12	BAIAP2L2	2.33331	8.83951e-16
ENSG00000007516.9	BAIAP3	1.67991	1.39586e-69
ENSG00000030110.8	BAK1	-0.812273	1.80115e-33
ENSG00000175334.3	BANF1	-0.329212	9.44935e-07
ENSG00000172530.15	BANP	0.384483	1.06664e-18
ENSG00000138376.6	BARD1	-0.713742	8.65339e-41
ENSG00000176788.7	BASP1	-2.21992	7.1091e-106
ENSG00000123685.4	BATF3	1.19968	4.84893e-05
ENSG00000198604.6	BAZ1A	-0.831665	6.14583e-38
ENSG00000009954.6	BAZ1B	-0.999381	1.68652e-143
ENSG00000076108.7	BAZ2A	0.343288	5.0626e-09
ENSG00000123636.13	BAZ2B	-0.622439	6.14664e-28
ENSG00000105327.11	BBC3	0.449286	1.49483e-16
ENSG00000214413.3	BBIP1	0.194327	0.0196567
ENSG00000181004.5	BBS12	-0.942768	4.89775e-05
ENSG00000125124.7	BBS2	-0.441752	1.52782e-09
ENSG00000140463.9	BBS4	-0.274222	9.19345e-05
ENSG00000138686.5	BBS7	-0.198936	0.0119199
ENSG00000122507.16	BBS9	0.505894	2.06627e-08
ENSG00000114439.14	BBX	-0.290448	2.09643e-08
ENSG00000132692.14	BCAN	-3.8007	1.3398e-12
ENSG00000075790.6	BCAP29	-0.206453	0.00516678
ENSG00000185825.11	BCAP31	-0.307384	1.89367e-08
ENSG00000050820.12	BCAR1	-2.12186	5.36024e-43
ENSG00000137936.12	BCAR3	0.983943	4.17229e-30
ENSG00000116752.5	BCAS2	-0.261407	0.000824341
ENSG00000141376.16	BCAS3	0.42449	1.33568e-07
ENSG00000124243.13	BCAS4	-0.3152	5.38036e-16
ENSG00000060982.10	BCAT1	-0.505607	5.96004e-25
ENSG00000105552.10	BCAT2	0.170127	0.00127163
ENSG00000107949.12	BCCIP	-0.231758	1.91164e-05
ENSG00000114200.5	BCHE	-3.20264	0.0088438
ENSG00000248098.6	BCKDHA	1.37245	6.61993e-13
ENSG00000103507.9	BCKDK	0.679834	2.30705e-24
ENSG00000142867.8	BCL10	-0.312899	1.31634e-07
ENSG00000119866.16	BCL11A	-0.579867	1.8426e-27
ENSG00000171552.8	BCL2L1	-0.431862	4.90291e-25
ENSG00000153094.17	BCL2L11	0.675295	2.02845e-31
ENSG00000126453.5	BCL2L12	1.01421	7.6947e-28
ENSG00000129473.5	BCL2L2	-1.53229	6.62923e-32
ENSG00000069399.8	BCL3	0.806165	1.07262e-12
ENSG00000113916.13	BCL6	-0.536876	2.17601e-26
ENSG00000161940.6	BCL6B	1.68298	0.0358997
ENSG00000110987.4	BCL7A	-0.141255	1.48621e-05
ENSG00000106635.3	BCL7B	-0.71822	4.9328e-33
ENSG00000029363.11	BCLAF1	-0.199401	0.000579715
ENSG00000197580.7	BCO2	1.15331	0.0350138
ENSG00000183337.12	BCOR	-0.567416	4.37243e-20
ENSG00000085185.11	BCORL1	0.438919	0.0019166
ENSG00000186716.15	BCR	-0.155191	0.00679576
ENSG00000161267.7	BDH1	0.132517	0.0279033
ENSG00000168398.5	BDKRB2	3.62298	0.0306943
ENSG00000145734.14	BDP1	-0.175052	0.00174311
ENSG00000188848.11	BEND4	-0.1566	0.000375162
ENSG00000167995.11	BEST1	1.09083	1.99547e-39
ENSG00000127325.14	BEST3	-0.419451	1.08518e-19
ENSG00000142959.4	BEST4	1.05944	2.45664e-11
ENSG00000177951.13	BET1L	0.259838	3.67995e-06
ENSG00000133169.5	BEX1	-3.41884	0.0127695
ENSG00000103429.6	BFAR	-0.651661	4.28607e-31
ENSG00000170819.4	BFSP2	0.738223	1.4477e-06
ENSG00000242252.1	BGLAP	1.00531	0.0221938
ENSG00000182492.11	BGN	-3.53419	0.0133558
ENSG00000180535.3	BHLHA15	1.26769	1.77387e-25
ENSG00000205899.3	BHLHA9	2.36814	0.0122875
ENSG00000198908.7	BHLHB9	-5.14449	1.01875e-10
ENSG00000125533.4	BHLHE23	1.26551	0.0403927
ENSG00000122870.7	BICC1	1.69244	1.21037e-06
ENSG00000151746.9	BICD1	0.804825	2.26797e-50
ENSG00000100290.2	BIK	-0.230003	0.00112314
ENSG00000110934.6	BIN2	0.462532	1.37566e-09
ENSG00000147439.7	BIN3	0.415886	2.66424e-08
ENSG00000110330.4	BIRC2	-0.548573	2.06761e-16
ENSG00000023445.9	BIRC3	-1.23554	3.71111e-97
ENSG00000089685.10	BIRC5	-1.21669	3.22269e-108
ENSG00000115760.9	BIRC6	-0.353942	6.44384e-23
ENSG00000166619.8	BLCAP	0.205053	2.2614e-06
ENSG00000136573.8	BLK	0.204353	1.91732e-11
ENSG00000197299.6	BLM	-0.725031	4.90088e-31
ENSG00000108578.10	BLMH	-0.140908	0.00748526
ENSG00000135441.3	BLOC1S1	-0.314744	0.000354824
ENSG00000196072.7	BLOC1S2	-0.401068	9.82034e-10
ENSG00000189114.6	BLOC1S3	0.512635	1.18047e-09
ENSG00000188428.12	BLOC1S5	-0.814967	9.97777e-24
ENSG00000117475.9	BLZF1	-0.46553	1.00209e-07
ENSG00000104081.9	BMF	-0.332108	9.57175e-10
ENSG00000168487.13	BMP1	0.666084	0.000154675
ENSG00000138756.13	BMP2K	0.162172	0.0022409
ENSG00000152785.6	BMP3	-0.425009	7.1939e-21
ENSG00000153162.8	BMP6	1.01374	2.06283e-36
ENSG00000101144.8	BMP7	-0.275221	3.20281e-10
ENSG00000183682.7	BMP8A	0.986307	0.00223095
ENSG00000116985.6	BMP8B	0.692983	0.000265744
ENSG00000107779.7	BMPR1A	0.373525	0.0298929
ENSG00000138696.6	BMPR1B	-4.06731	0.000569168
ENSG00000204217.8	BMPR2	0.373088	5.72066e-12
ENSG00000165733.7	BMS1	-0.603367	1.96102e-21
ENSG00000113734.13	BNIP1	-1.3849	2.01452e-22
ENSG00000140299.7	BNIP2	-1.20964	3.72978e-105
ENSG00000176171.7	BNIP3	0.2921	1.73762e-06
ENSG00000163141.14	BNIPL	1.75432	1.02621e-28
ENSG00000145919.6	BOD1	-0.683999	6.65724e-25
ENSG00000038219.8	BOD1L1	-0.132087	0.0013866
ENSG00000169627.7	BOLA2B	6.26103	0.000181546
ENSG00000170727.7	BOP1	0.671567	3.50861e-12
ENSG00000136122.11	BORA	-1.08232	9.88741e-51
ENSG00000137274.8	BPHL	0.452788	5.1921e-07
ENSG00000162813.13	BPNT1	-0.672131	2.52764e-27
ENSG00000171634.12	BPTF	0.204403	8.48608e-07
ENSG00000089234.11	BRAP	-0.503331	4.28983e-11
ENSG00000106009.11	BRAT1	-0.258289	3.83935e-06
ENSG00000012048.15	BRCA1	-0.57627	8.16939e-31
ENSG00000139618.10	BRCA2	-1.13714	1.1415e-43
ENSG00000204256.8	BRD2	-0.136008	0.00028695
ENSG00000169925.12	BRD3	0.823231	1.64217e-36
ENSG00000141867.13	BRD4	0.633662	2.10399e-38
ENSG00000166164.11	BRD7	-0.396188	4.63972e-17
ENSG00000112983.13	BRD8	-0.159879	0.0035519
ENSG00000028310.13	BRD9	0.807414	4.28257e-61
ENSG00000158019.16	BRE	-0.359484	0.00423729
ENSG00000185024.11	BRF1	-0.226647	3.25978e-05
ENSG00000104221.8	BRF2	0.354434	8.09886e-05
ENSG00000164713.5	BRI3	0.479632	0.000840642
ENSG00000184992.10	BRI3BP	-0.188431	0.00055725
ENSG00000182685.3	BRICD5	0.329104	0.000362694
ENSG00000136492.4	BRIP1	-0.487148	8.2211e-17
ENSG00000113460.8	BRIX1	-1.23936	3.03654e-23
ENSG00000254999.2	BRK1	-0.372622	3.07216e-10
ENSG00000100916.9	BRMS1L	-0.388775	0.0319272
ENSG00000162819.7	BROX	-0.263397	4.47427e-05
ENSG00000156983.11	BRPF1	-0.239992	6.69487e-07
ENSG00000096070.15	BRPF3	0.426624	1.02433e-12
ENSG00000160469.12	BRSK1	0.505767	2.91997e-21
ENSG00000174672.11	BRSK2	1.31497	3.66104e-05
ENSG00000185658.9	BRWD1	-0.145615	0.0031292
ENSG00000165288.10	BRWD3	-0.159205	0.00177717
ENSG00000168000.10	BSCL2	0.53579	6.74241e-05
ENSG00000160058.14	BSDC1	0.786466	3.30323e-57
ENSG00000172270.14	BSG	0.278156	1.51448e-11
ENSG00000164061.4	BSN	0.524962	0.00482803
ENSG00000119411.10	BSPRY	-1.41052	1.50431e-46
ENSG00000095564.9	BTAF1	0.311659	1.17784e-10
ENSG00000064726.5	BTBD1	-0.422139	2.92814e-16
ENSG00000148925.6	BTBD10	-1.22565	1.98547e-42
ENSG00000151136.10	BTBD11	4.63213	0.000992228
ENSG00000233436.3	BTBD18	2.60054	1.56773e-35
ENSG00000222009.4	BTBD19	1.76793	1.33169e-22
ENSG00000133243.4	BTBD2	0.165316	0.000871134
ENSG00000132640.10	BTBD3	-2.33809	0.0309627
ENSG00000011114.10	BTBD7	-0.204216	0.00375668
ENSG00000189195.5	BTBD8	0.462841	0.000300081
ENSG00000183826.12	BTBD9	0.458823	6.57941e-05
ENSG00000169814.8	BTD	0.419745	0.023133
ENSG00000145741.11	BTF3	-0.116156	0.0296934
ENSG00000134717.13	BTF3L4	-0.425855	1.38345e-11
ENSG00000133639.3	BTG1	0.220484	4.42428e-07
ENSG00000159388.5	BTG2	-0.111692	0.00251729
ENSG00000010671.11	BTK	-0.666103	1.1616e-25
ENSG00000112763.11	BTN2A1	-0.41371	4.41735e-09
ENSG00000124508.12	BTN2A2	-0.226204	0.000122579
ENSG00000026950.12	BTN3A1	-0.53227	7.84297e-20
ENSG00000186470.9	BTN3A2	-0.80126	4.38152e-52
ENSG00000111801.11	BTN3A3	-0.654825	6.64631e-15
ENSG00000204290.6	BTNL2	1.54264	0.000664999
ENSG00000166167.13	BTRC	-0.602611	9.04935e-14
ENSG00000169679.10	BUB1	-1.41561	7.03341e-170
ENSG00000156970.8	BUB1B	-0.742054	2.98568e-56
ENSG00000154473.13	BUB3	-0.627117	5.79315e-49
ENSG00000137656.7	BUD13	-1.01677	1.00686e-48
ENSG00000106245.5	BUD31	0.118755	0.0102649
ENSG00000112578.5	BYSL	-0.926385	3.70171e-37
ENSG00000005379.11	BZRAP1	1.4925	2.98015e-73
ENSG00000082153.13	BZW1	-0.768999	5.26782e-44
ENSG00000136261.10	BZW2	-0.410581	2.35058e-10
ENSG00000165813.12	C10orf118	-0.340908	9.17219e-05
ENSG00000155640.5	C10orf12	-0.315674	4.25281e-07
ENSG00000173088.8	C10orf131	1.52938	4.09214e-05
ENSG00000107815.3	C10orf2	-0.707703	1.96891e-20
ENSG00000166275.11	C10orf32	-0.474504	0.00385843
ENSG00000120029.8	C10orf76	0.559585	6.10168e-15
ENSG00000180066.5	C10orf91	1.12366	0.00036848
ENSG00000120055.5	C10orf95	0.829525	2.42875e-05
ENSG00000137720.3	C11orf1	-0.412401	0.0019683
ENSG00000171067.6	C11orf24	-0.440284	1.28554e-19
ENSG00000211450.5	C11orf31	0.360889	5.61715e-10
ENSG00000185522.4	C11orf35	0.822119	1.28963e-20
ENSG00000149179.9	C11orf49	0.269335	0.000605119
ENSG00000182919.10	C11orf54	-0.172282	0.0258032
ENSG00000150776.13	C11orf57	-0.210339	0.00261573
ENSG00000110696.5	C11orf58	0.100498	0.0318982
ENSG00000175573.6	C11orf68	0.303445	1.38342e-06
ENSG00000184224.3	C11orf72	1.10968	0.047081
ENSG00000149196.11	C11orf73	-0.629482	9.74565e-14
ENSG00000173715.11	C11orf80	0.416888	1.83861e-13
ENSG00000165490.8	C11orf82	-1.08194	5.53143e-32
ENSG00000204922.4	C11orf83	0.298711	2.30342e-05
ENSG00000168005.4	C11orf84	0.252392	1.18298e-07
ENSG00000184682.5	C11orf89	-1.04947	0.0487286
ENSG00000139637.9	C12orf10	-0.306552	8.2113e-06
ENSG00000151135.5	C12orf23	-0.656784	5.1709e-30
ENSG00000047621.7	C12orf4	-0.734439	1.04774e-10
ENSG00000123395.10	C12orf44	-0.225714	0.00393365
ENSG00000111412.4	C12orf49	-0.873881	9.39805e-76
ENSG00000078237.4	C12orf5	-0.279527	0.00870124
ENSG00000111678.6	C12orf57	0.540352	1.87952e-20
ENSG00000182993.3	C12orf60	-0.609212	0.011811
ENSG00000221949.2	C12orf61	1.59314	7.88e-76
ENSG00000130921.3	C12orf65	0.339665	2.94019e-08
ENSG00000204954.5	C12orf73	0.519113	1.75714e-10
ENSG00000235162.4	C12orf75	-0.287107	1.08606e-06
ENSG00000226397.3	C12orf77	0.312185	0.00147072
ENSG00000257242.2	C12orf79	0.407255	0.0350111
ENSG00000227051.4	C14orf132	-2.77708	0.0321477
ENSG00000170270.4	C14orf142	-0.439176	4.69142e-10
ENSG00000133943.16	C14orf159	0.833568	2.71497e-39
ENSG00000087302.4	C14orf166	-0.566761	1.19856e-17
ENSG00000214900.4	C14orf182	1.5077	5.2309e-10
ENSG00000156411.5	C14orf2	-0.282767	2.5769e-05
ENSG00000179476.3	C14orf28	1.00185	4.65527e-22
ENSG00000140104.9	C14orf79	2.02239	5.81614e-31
ENSG00000185347.13	C14orf80	0.506028	3.77816e-23
ENSG00000156206.9	C15orf26	1.7101	0.00900009
ENSG00000259642.1	C15orf37	1.45174	2.95287e-19
ENSG00000167173.14	C15orf39	0.827435	7.4064e-23
ENSG00000169609.9	C15orf40	0.42911	4.90576e-13
ENSG00000186073.7	C15orf41	-0.225217	0.0477636
ENSG00000188549.8	C15orf52	-1.18819	0.0279313
ENSG00000128891.11	C15orf57	0.689936	1.97944e-15
ENSG00000188277.8	C15orf62	1.15852	1.80692e-39
ENSG00000261652.2	C15orf65	-0.680891	0.00233182
ENSG00000130731.11	C16orf13	0.19466	0.00171443
ENSG00000166780.6	C16orf45	0.785066	0.0100677
ENSG00000166455.9	C16orf46	1.46841	0.00021391
ENSG00000185716.7	C16orf52	-0.349087	0.00187719
ENSG00000185905.3	C16orf54	-0.781108	9.71421e-07
ENSG00000140688.12	C16orf58	0.376812	5.54255e-12
ENSG00000162062.10	C16orf59	0.297738	6.96792e-09
ENSG00000103544.10	C16orf62	-0.187859	0.00622383
ENSG00000125149.7	C16orf70	0.214668	0.0408927
ENSG00000166246.9	C16orf71	0.681262	0.00562539
ENSG00000182831.7	C16orf72	-0.149061	0.0194654
ENSG00000154102.6	C16orf74	-1.65731	5.51954e-92
ENSG00000070761.3	C16orf80	-0.337448	3.21887e-09
ENSG00000155330.5	C16orf87	-0.16991	0.016261
ENSG00000260456.2	C16orf95	0.320922	0.0124903
ENSG00000154035.6	C17orf103	2.01326	4.9932e-25
ENSG00000180336.13	C17orf104	1.44583	1.95159e-17
ENSG00000205710.3	C17orf107	2.72882	0.000164754
ENSG00000258315.1	C17orf49	1.23977	1.97823e-07
ENSG00000154768.4	C17orf50	0.675094	0.00110791
ENSG00000212719.6	C17orf51	-0.401589	3.28828e-08
ENSG00000125319.10	C17orf53	0.185898	0.0204449
ENSG00000196544.6	C17orf59	0.479779	1.7152e-12
ENSG00000178927.12	C17orf62	0.0850202	0.0240647
ENSG00000141371.8	C17orf64	0.990095	0.00676785
ENSG00000214226.4	C17orf67	0.612818	6.41559e-10
ENSG00000185504.12	C17orf70	0.687242	1.02025e-34
ENSG00000224383.3	C17orf72	-0.401063	0.0043181
ENSG00000108666.5	C17orf75	-0.348436	2.15072e-06
ENSG00000141219.11	C17orf80	-0.546672	2.54555e-15
ENSG00000224877.3	C17orf89	0.163973	0.0270104
ENSG00000179294.5	C17orf96	1.05844	4.04115e-76
ENSG00000214556.4	C17orf98	3.03279	0.00644671
ENSG00000187997.7	C17orf99	1.21141	0.0174165
ENSG00000152242.6	C18orf25	0.396452	7.09714e-17
ENSG00000177576.6	C18orf32	0.831071	7.36015e-09
ENSG00000166845.9	C18orf54	-0.254599	0.000162736
ENSG00000176912.3	C18orf56	0.438178	3.60806e-05
ENSG00000141452.5	C18orf8	-0.535604	1.48097e-15
ENSG00000131943.13	C19orf12	-0.367002	4.22227e-07
ENSG00000228300.9	C19orf24	0.439038	7.25289e-09
ENSG00000119559.11	C19orf25	0.545973	1.79094e-25
ENSG00000099625.8	C19orf26	1.41709	0.000298562
ENSG00000188305.4	C19orf35	2.67663	1.55711e-78
ENSG00000214212.4	C19orf38	0.355061	0.00671445
ENSG00000131944.5	C19orf40	-0.470237	0.000660404
ENSG00000123144.6	C19orf43	0.110882	0.00725083
ENSG00000160392.9	C19orf47	0.428763	2.92359e-11
ENSG00000167747.9	C19orf48	-0.222392	1.34337e-12
ENSG00000142444.6	C19orf52	0.651798	1.71223e-29
ENSG00000188493.10	C19orf54	1.00748	5.10802e-28
ENSG00000167595.10	C19orf55	1.01853	2.27197e-36
ENSG00000006015.13	C19orf60	0.272411	2.36622e-08
ENSG00000130813.13	C19orf66	0.925895	1.91976e-37
ENSG00000188032.5	C19orf67	1.45694	6.04173e-16
ENSG00000185453.8	C19orf68	0.743041	4.65879e-16
ENSG00000174917.4	C19orf70	0.27339	0.000198124
ENSG00000183397.5	C19orf71	0.436883	0.0018875
ENSG00000221916.2	C19orf73	1.16068	4.38247e-15
ENSG00000267106.1	C19orf82	0.507204	0.000126207
ENSG00000106392.6	C1GALT1	-0.199331	0.00752257
ENSG00000116922.10	C1orf109	-0.443273	7.23602e-12
ENSG00000000460.12	C1orf112	0.477785	6.60833e-12
ENSG00000197982.12	C1orf122	0.187032	0.00673006
ENSG00000143633.8	C1orf131	-0.329926	7.61394e-05
ENSG00000204377.3	C1orf134	-2.2605	1.06252e-14
ENSG00000162913.9	C1orf145	1.34565	0.0357369
ENSG00000131591.13	C1orf159	0.30278	0.00273568
ENSG00000175707.7	C1orf172	-1.71525	5.92146e-08
ENSG00000198912.6	C1orf174	-0.46278	1.8881e-09
ENSG00000163263.6	C1orf189	2.66511	0.00168939
ENSG00000179840.5	C1orf200	1.63388	6.65374e-18
ENSG00000116667.8	C1orf21	-4.88746	4.97839e-05
ENSG00000249087.3	C1orf213	0.659282	7.08057e-15
ENSG00000142686.7	C1orf216	0.363324	0.00245805
ENSG00000213057.4	C1orf220	0.753987	0.0198665
ENSG00000142609.13	C1orf222	1.84309	0.00855651
ENSG00000198520.6	C1orf228	1.34809	2.51642e-26
ENSG00000228594.1	C1orf233	-2.19863	0.00462838
ENSG00000143793.8	C1orf35	0.175481	0.00055695
ENSG00000143612.14	C1orf43	-0.388616	1.20994e-18
ENSG00000164008.9	C1orf50	0.766329	4.79474e-21
ENSG00000162642.9	C1orf52	-0.175881	0.0034572
ENSG00000203724.6	C1orf53	0.753646	0.000152129
ENSG00000143443.9	C1orf56	0.437245	0.00109109
ENSG00000125462.12	C1orf61	-2.81878	5.70538e-18
ENSG00000117616.13	C1orf63	1.0853	4.04845e-105
ENSG00000162757.3	C1orf74	-0.239216	0.0294681
ENSG00000162585.12	C1orf86	0.612152	1.85982e-22
ENSG00000108561.4	C1QBP	-0.465622	1.27273e-15
ENSG00000165985.8	C1QL3	-1.02448	6.52039e-05
ENSG00000186897.3	C1QL4	2.19374	1.03251e-09
ENSG00000172247.3	C1QTNF4	2.49415	2.67795e-07
ENSG00000133466.9	C1QTNF6	0.612658	1.12011e-06
ENSG00000163145.8	C1QTNF7	1.91308	0.0384223
ENSG00000139178.6	C1RL	0.496915	0.00132291
ENSG00000166278.10	C2	1.15854	2.44459e-09
ENSG00000197183.8	C20orf112	-1.14506	3.09639e-19
ENSG00000149609.5	C20orf144	0.887682	1.5506e-15
ENSG00000088854.11	C20orf194	-3.4909	3.59046e-18
ENSG00000125531.5	C20orf195	0.899927	1.88569e-08
ENSG00000171984.10	C20orf196	-0.28396	0.000264698
ENSG00000196476.7	C20orf96	0.932158	1.25347e-19
ENSG00000256073.2	C21orf119	1.02807	1.32713e-20
ENSG00000160226.11	C21orf2	0.785393	1.09136e-21
ENSG00000205930.4	C21orf49	0.805344	4.61924e-07
ENSG00000160298.13	C21orf58	0.717928	1.3115e-53
ENSG00000183250.7	C21orf67	0.476601	0.0448715
ENSG00000169314.10	C22orf15	1.60994	2.85085e-18
ENSG00000128346.6	C22orf23	-0.468766	0.00346166
ENSG00000128254.9	C22orf24	1.22823	1.07341e-06
ENSG00000182257.5	C22orf26	1.40825	2.83808e-12
ENSG00000215012.4	C22orf29	0.290891	0.000237501
ENSG00000188511.8	C22orf34	1.25029	3.25235e-92
ENSG00000242259.4	C22orf39	-0.49823	6.37489e-15
ENSG00000184208.10	C22orf46	0.263772	0.00301301
ENSG00000168014.12	C2CD3	0.372185	1.34148e-11
ENSG00000183186.6	C2CD4C	1.03533	0.0490377
ENSG00000111731.8	C2CD5	-0.165723	0.0214685
ENSG00000273045.1	C2ORF15	-1.23622	3.37527e-13
ENSG00000241962.5	C2orf15	0.911148	0.0230914
ENSG00000221843.2	C2orf16	1.1848	5.73255e-11
ENSG00000115998.3	C2orf42	0.48363	2.74045e-11
ENSG00000118961.10	C2orf43	-0.511649	3.2586e-08
ENSG00000163026.7	C2orf44	-0.615795	3.81377e-15
ENSG00000162972.6	C2orf47	-0.256056	0.0244975
ENSG00000163009.4	C2orf48	0.885576	5.81745e-25
ENSG00000186143.6	C2orf53	1.70634	0.00383056
ENSG00000158428.3	C2orf62	2.60559	0.00163839
ENSG00000168887.6	C2orf68	0.166021	0.000306264
ENSG00000178074.5	C2orf69	-0.227474	0.0124981
ENSG00000177994.11	C2orf73	2.8135	0.0175579
ENSG00000186132.10	C2orf76	0.547534	2.48555e-10
ENSG00000159239.7	C2orf81	0.715519	4.00599e-10
ENSG00000187699.6	C2orf88	0.174657	0.00672003
ENSG00000163608.10	C3orf17	-0.958296	2.26898e-20
ENSG00000131379.5	C3orf20	0.636569	6.89631e-19
ENSG00000198590.7	C3orf35	1.07572	0.000323373
ENSG00000114529.8	C3orf52	-0.524556	4.86801e-17
ENSG00000181744.4	C3orf58	0.699411	3.95932e-59
ENSG00000188315.3	C3orf62	-0.622202	6.53607e-09
ENSG00000187068.2	C3orf70	-2.3937	0.0334825
ENSG00000225526.4	C3orf83	0.924833	0.00134064
ENSG00000244731.3	C4A	1.52918	9.1762e-05
ENSG00000123838.6	C4BPA	3.0143	0.0067445
ENSG00000197826.7	C4orf22	0.335095	0.0496598
ENSG00000056050.6	C4orf27	-0.953805	8.83692e-15
ENSG00000164074.10	C4orf29	-0.30318	4.40293e-05
ENSG00000164096.10	C4orf3	0.382449	2.48175e-09
ENSG00000174749.5	C4orf32	0.562989	7.34698e-06
ENSG00000151470.8	C4orf33	-0.661915	1.82003e-12
ENSG00000163633.6	C4orf36	1.23752	1.15024e-42
ENSG00000205208.4	C4orf46	-0.398618	8.54101e-14
ENSG00000205129.4	C4orf47	1.38231	5.31881e-07
ENSG00000243449.2	C4orf48	0.569685	7.96262e-07
ENSG00000106804.6	C5	-0.728117	1.75912e-16
ENSG00000197405.3	C5AR1	1.47892	0.0080252
ENSG00000113583.6	C5orf15	-0.340998	2.94474e-05
ENSG00000082213.13	C5orf22	-0.41411	1.52218e-06
ENSG00000181904.8	C5orf24	0.354675	1.67808e-07
ENSG00000151881.10	C5orf28	-0.320891	5.87865e-06
ENSG00000172244.4	C5orf34	-0.236453	0.0120338
ENSG00000197603.9	C5orf42	-2.13913	0.000133199
ENSG00000161010.10	C5orf45	0.477996	4.44373e-15
ENSG00000205765.4	C5orf51	-0.303445	6.76858e-05
ENSG00000221990.2	C5orf55	1.24115	4.80195e-22
ENSG00000204661.5	C5orf60	3.33586	0.0340867
ENSG00000164241.9	C5orf63	0.519572	0.000467428
ENSG00000186577.7	C6orf1	0.455886	1.79475e-12
ENSG00000196821.5	C6orf106	-1.0554	1.53224e-159
ENSG00000185127.5	C6orf120	0.526102	9.08147e-22
ENSG00000204564.7	C6orf136	0.793	2.82054e-24
ENSG00000203872.6	C6orf163	0.86861	0.000661827
ENSG00000146476.6	C6orf211	-0.548316	4.79203e-09
ENSG00000181577.11	C6orf223	-1.83041	4.02691e-20
ENSG00000221821.2	C6orf226	1.12203	1.17717e-21
ENSG00000204420.4	C6orf25	3.11149	2.00016e-17
ENSG00000204439.3	C6orf47	0.224522	0.00760543
ENSG00000204387.8	C6orf48	-0.104614	0.0169419
ENSG00000137434.7	C6orf52	0.848584	0.000443881
ENSG00000154079.5	C6orf57	0.545142	1.83909e-09
ENSG00000112308.8	C6orf62	0.328137	9.94851e-21
ENSG00000198663.12	C6orf89	-0.129035	0.00453912
ENSG00000203711.7	C6orf99	1.04739	2.36938e-18
ENSG00000244291.1	C7orf13	1.16665	7.9185e-06
ENSG00000136197.8	C7orf25	1.18327	5.20137e-08
ENSG00000146576.8	C7orf26	-0.623758	4.00139e-18
ENSG00000153790.7	C7orf31	0.546852	2.6991e-05
ENSG00000180354.11	C7orf41	-1.11087	8.04462e-10
ENSG00000146826.10	C7orf43	0.400779	1.4241e-13
ENSG00000122783.12	C7orf49	0.140426	0.00224016
ENSG00000146540.10	C7orf50	-0.43513	1.21618e-47
ENSG00000164898.8	C7orf55	0.491584	0.00428042
ENSG00000146963.13	C7orf55-LUC7L2	0.200745	3.10266e-08
ENSG00000164603.7	C7orf60	-0.805992	1.31975e-27
ENSG00000176919.7	C8G	1.57931	2.01922e-11
ENSG00000184608.4	C8orf12	-0.612168	5.25325e-30
ENSG00000156172.5	C8orf37	-0.215227	0.0306905
ENSG00000213865.3	C8orf44	-0.325366	0.0172862
ENSG00000169085.7	C8orf46	1.52592	0.0018349
ENSG00000189376.7	C8orf76	0.568346	0.000121209
ENSG00000198917.7	C9orf114	0.255001	1.27123e-05
ENSG00000160345.8	C9orf116	0.923452	0.00552682
ENSG00000160401.10	C9orf117	1.16324	8.25593e-06
ENSG00000174038.8	C9orf131	1.48359	6.21642e-06
ENSG00000230185.4	C9orf147	1.31688	4.37966e-48
ENSG00000171159.4	C9orf16	0.382204	2.5795e-13
ENSG00000196366.1	C9orf163	0.678458	1.37829e-09
ENSG00000197191.3	C9orf169	1.16618	1.75875e-13
ENSG00000232434.1	C9orf172	2.09402	1.62236e-24
ENSG00000197768.6	C9orf173	1.37911	3.48492e-15
ENSG00000148120.10	C9orf3	0.547786	8.28622e-09
ENSG00000203993.3	C9orf37	0.23919	0.000116918
ENSG00000135045.6	C9orf40	-0.239434	1.58153e-07
ENSG00000156017.8	C9orf41	-0.197771	0.000421587
ENSG00000157653.7	C9orf43	0.8336	1.46497e-06
ENSG00000183784.5	C9orf66	0.564382	0.000761703
ENSG00000147894.10	C9orf72	-0.457668	2.39015e-06
ENSG00000136819.10	C9orf78	0.18117	0.00126582
ENSG00000165181.12	C9orf84	1.95223	0.0029805
ENSG00000155621.10	C9orf85	-0.864063	8.67591e-18
ENSG00000165233.13	C9orf89	-0.221443	0.0208138
ENSG00000165698.11	C9orf9	0.533045	0.0278509
ENSG00000157693.10	C9orf91	-0.177032	0.0145808
ENSG00000198870.6	C9orf96	0.63849	8.8336e-05
ENSG00000063180.4	CA11	-0.530329	0.00687267
ENSG00000074410.9	CA12	4.30499	5.95394e-19
ENSG00000185015.3	CA13	0.415413	0.00118965
ENSG00000118298.6	CA14	1.75602	1.24928e-22
ENSG00000104267.5	CA2	-4.0667	0.000667989
ENSG00000178538.5	CA8	0.497118	1.02531e-05
ENSG00000102547.14	CAB39L	-0.53615	2.15939e-06
ENSG00000099991.12	CABIN1	0.323317	4.37366e-13
ENSG00000134508.8	CABLES1	0.377764	0.0233777
ENSG00000149679.7	CABLES2	0.873956	1.40234e-27
ENSG00000151067.16	CACNA1C	1.06344	0.0451237
ENSG00000153956.11	CACNA2D1	2.13086	0.0115913
ENSG00000151062.10	CACNA2D4	0.676282	1.53342e-05
ENSG00000067191.11	CACNB1	0.532487	4.68037e-13
ENSG00000167535.3	CACNB3	0.804158	4.3729e-26
ENSG00000075461.5	CACNG4	-4.02733	0.000885193
ENSG00000105605.3	CACNG7	-3.37343	0.0108853
ENSG00000142408.2	CACNG8	-1.98086	0.0473997
ENSG00000105298.9	CACTIN	0.608468	3.70079e-28
ENSG00000151893.10	CACUL1	-0.342984	1.00982e-14
ENSG00000116161.13	CACYBP	-0.41017	1.10381e-13
ENSG00000182985.12	CADM1	-0.226112	2.52318e-05
ENSG00000175161.9	CADM2	-4.03472	0.00162187
ENSG00000163618.13	CADPS	0.515442	1.35118e-34
ENSG00000164304.11	CAGE1	1.49131	2.83808e-12
ENSG00000175868.9	CALCB	0.726154	0.000260894
ENSG00000012822.11	CALCOCO1	1.43153	6.40757e-71
ENSG00000136436.10	CALCOCO2	-0.426995	5.74883e-22
ENSG00000122786.15	CALD1	-2.03777	3.99731e-09
ENSG00000198668.6	CALM1	-0.118764	0.00167849
ENSG00000143933.12	CALM2	-0.465174	6.16058e-17
ENSG00000129007.10	CALML4	0.247748	0.00142948
ENSG00000169885.5	CALML6	1.05573	1.48188e-05
ENSG00000128595.12	CALU	-0.40706	5.19776e-16
ENSG00000130643.4	CALY	1.42678	1.59017e-05
ENSG00000134072.6	CAMK1	0.816522	0.0189504
ENSG00000183049.8	CAMK1D	0.159192	0.0477113
ENSG00000145349.12	CAMK2D	-0.367051	6.97571e-22
ENSG00000148660.16	CAMK2G	-0.43069	2.33122e-11
ENSG00000163888.3	CAMK2N2	1.75862	4.45009e-10
ENSG00000152495.6	CAMK4	-0.143293	0.00201716
ENSG00000143919.10	CAMKMT	0.668502	3.41822e-17
ENSG00000164076.12	CAMKV	0.97991	0.000323898
ENSG00000164615.3	CAMLG	-0.242275	1.93125e-05
ENSG00000164047.3	CAMP	-1.39459	4.09699e-42
ENSG00000130559.14	CAMSAP1	-0.62389	3.46944e-62
ENSG00000118200.10	CAMSAP2	0.326871	0.000186849
ENSG00000171735.14	CAMTA1	-0.273436	2.70951e-05
ENSG00000108509.16	CAMTA2	1.09467	6.34524e-37
ENSG00000111530.8	CAND1	-0.782942	4.66026e-71
ENSG00000171302.12	CANT1	-0.542488	2.05476e-13
ENSG00000127022.10	CANX	-0.286243	1.83934e-11
ENSG00000131236.12	CAP1	-0.369595	5.30231e-14
ENSG00000014216.11	CAPN1	-0.288977	3.14835e-12
ENSG00000142330.15	CAPN10	0.344443	1.31286e-18
ENSG00000162909.13	CAPN2	0.805048	0.00909183
ENSG00000131375.5	CAPN7	0.263438	1.44116e-07
ENSG00000135387.15	CAPRIN1	-0.329375	2.23022e-23
ENSG00000110888.13	CAPRIN2	0.628806	1.27612e-29
ENSG00000105519.8	CAPS	0.487117	8.91622e-09
ENSG00000180881.15	CAPS2	0.752377	0.0158187
ENSG00000116489.8	CAPZA1	-0.4566	9.78483e-20
ENSG00000198898.8	CAPZA2	-0.720553	6.90415e-38
ENSG00000077549.13	CAPZB	-0.151426	0.00229781
ENSG00000198286.5	CARD11	-0.158278	1.50883e-05
ENSG00000204397.3	CARD16	3.8878	1.57011e-08
ENSG00000187796.9	CARD9	1.40253	1.29484e-40
ENSG00000138380.13	CARF	0.687059	1.21989e-20
ENSG00000153048.6	CARHSP1	-0.174985	1.89124e-05
ENSG00000172508.6	CARNS1	1.23302	6.23255e-32
ENSG00000110619.12	CARS	-0.537099	5.03247e-34
ENSG00000204682.5	CASC10	2.02645	0.00540324
ENSG00000108349.10	CASC3	-0.263563	8.71392e-08
ENSG00000166734.14	CASC4	0.135085	0.00618954
ENSG00000137812.15	CASC5	-0.835534	2.18961e-46
ENSG00000167971.14	CASKIN1	2.16998	3.2807e-10
ENSG00000137752.18	CASP1	7.072	1.7788e-10
ENSG00000228146.2	CASP16	0.654747	0.00559097
ENSG00000106144.15	CASP2	0.251361	3.46893e-06
ENSG00000164305.13	CASP3	-0.378486	5.76163e-11
ENSG00000196954.8	CASP4	-0.599784	0.0216979
ENSG00000138794.5	CASP6	-0.405669	9.34205e-05
ENSG00000165806.15	CASP7	-0.628425	9.32795e-18
ENSG00000143318.8	CASQ1	1.31294	0.0366595
ENSG00000087589.12	CASS4	2.47577	2.73352e-19
ENSG00000130940.10	CASZ1	1.25236	6.99862e-34
ENSG00000121691.4	CAT	-0.629038	3.73747e-25
ENSG00000166762.12	CATSPER2	0.832484	3.46774e-08
ENSG00000174898.11	CATSPERD	1.30066	1.75607e-05
ENSG00000099338.18	CATSPERG	1.51351	2.76934e-31
ENSG00000105971.10	CAV2	2.02208	0.0371098
ENSG00000078699.17	CBFA2T2	0.229297	0.0276372
ENSG00000129993.10	CBFA2T3	0.982416	2.2465e-63
ENSG00000105879.7	CBLL1	-0.337477	1.62436e-08
ENSG00000139899.6	CBLN3	0.692936	1.48058e-11
ENSG00000160200.13	CBS	0.317576	3.92733e-22
ENSG00000172785.14	CBWD1	-0.224856	0.0100677
ENSG00000136682.10	CBWD2	0.402137	3.22266e-07
ENSG00000204790.8	CBWD6	-0.626297	0.000229774
ENSG00000108468.10	CBX1	-0.411707	1.90885e-15
ENSG00000122565.14	CBX3	-0.444378	8.09685e-20
ENSG00000094916.9	CBX5	-0.123278	0.0473882
ENSG00000183741.7	CBX6	0.29223	1.39503e-06
ENSG00000100307.8	CBX7	0.825829	1.35233e-52
ENSG00000141570.6	CBX8	0.474051	3.58645e-12
ENSG00000100211.6	CBY1	0.222983	0.0381448
ENSG00000204659.4	CBY3	0.848717	1.11824e-05
ENSG00000132024.13	CC2D1A	0.369906	4.08704e-11
ENSG00000154222.10	CC2D1B	0.443358	6.87716e-22
ENSG00000158941.12	CCAR2	0.125622	0.00368028
ENSG00000171097.9	CCBL1	0.273975	0.00178725
ENSG00000137944.12	CCBL2	-0.643925	1.10531e-08
ENSG00000176476.4	CCDC101	-0.195422	0.028807
ENSG00000163001.7	CCDC104	-0.711389	1.36548e-08
ENSG00000173581.3	CCDC106	0.380746	1.19158e-09
ENSG00000159884.7	CCDC107	0.348317	0.00361277
ENSG00000005059.11	CCDC109B	-0.525888	3.79818e-14
ENSG00000172361.5	CCDC11	1.40265	4.39389e-16
ENSG00000168491.5	CCDC110	-0.955485	7.17777e-29
ENSG00000164221.8	CCDC112	-1.38425	1.68904e-32
ENSG00000105479.11	CCDC114	0.701173	0.000838642
ENSG00000136710.5	CCDC115	0.221176	0.000200617
ENSG00000161180.6	CCDC116	2.35214	1.54871e-10
ENSG00000159873.5	CCDC117	-0.590843	8.1357e-28
ENSG00000151773.8	CCDC122	-0.638241	1.67579e-10
ENSG00000183323.8	CCDC125	-0.43054	3.03931e-05
ENSG00000169193.7	CCDC126	-0.668999	3.53116e-07
ENSG00000164366.3	CCDC127	0.16464	0.00282651
ENSG00000104957.9	CCDC130	0.605052	1.07341e-40
ENSG00000004766.11	CCDC132	-0.427626	9.57414e-06
ENSG00000100147.9	CCDC134	0.654128	9.1971e-24
ENSG00000128596.12	CCDC136	0.899016	3.70542e-51
ENSG00000185298.8	CCDC137	0.298693	1.30937e-08
ENSG00000163006.7	CCDC138	0.219752	0.000337523
ENSG00000175455.10	CCDC14	0.317901	6.52823e-07
ENSG00000163492.9	CCDC141	0.424584	1.49838e-09
ENSG00000135637.9	CCDC142	0.640113	1.53897e-25
ENSG00000170160.12	CCDC144A	1.86408	6.68259e-87
ENSG00000120051.10	CCDC147	0.53039	1.1081e-08
ENSG00000153237.13	CCDC148	0.720187	0.00289388
ENSG00000144395.13	CCDC150	0.506212	1.16932e-09
ENSG00000198003.7	CCDC151	0.686935	0.0496493
ENSG00000197599.8	CCDC154	2.92387	1.0517e-38
ENSG00000161609.5	CCDC155	1.1262	1.88794e-07
ENSG00000183401.7	CCDC159	0.890641	5.48721e-22
ENSG00000255181.2	CCDC166	4.35899	0.00212176
ENSG00000198937.8	CCDC167	-0.47179	9.76749e-10
ENSG00000159588.10	CCDC17	1.23668	4.19455e-43
ENSG00000164989.11	CCDC171	0.440182	1.3455e-11
ENSG00000154781.11	CCDC174	0.203196	0.0010031
ENSG00000122483.13	CCDC18	0.167267	0.00373906
ENSG00000101997.8	CCDC22	0.250359	0.00125981
ENSG00000177868.7	CCDC23	-0.286651	0.0329342
ENSG00000147419.12	CCDC25	-0.538014	9.63397e-13
ENSG00000162592.4	CCDC27	0.923231	0.00174829
ENSG00000024862.12	CCDC28A	-0.152285	0.0400468
ENSG00000160050.10	CCDC28B	-0.213012	0.00299235
ENSG00000186409.10	CCDC30	0.818988	4.81249e-06
ENSG00000109881.12	CCDC34	-0.398954	4.21392e-08
ENSG00000165972.8	CCDC38	1.3161	2.58057e-07
ENSG00000145075.7	CCDC39	0.490652	0.000125058
ENSG00000180329.9	CCDC43	-0.664843	2.74629e-16
ENSG00000108588.9	CCDC47	-0.225087	4.17231e-05
ENSG00000164051.9	CCDC51	-0.7516	2.37995e-17
ENSG00000120860.6	CCDC53	-0.194713	0.0140258
ENSG00000176155.14	CCDC57	1.38783	1.40778e-141
ENSG00000160124.5	CCDC58	-0.501201	0.000449702
ENSG00000108091.10	CCDC6	-0.187065	7.86701e-06
ENSG00000104983.4	CCDC61	0.527623	3.33202e-11
ENSG00000130783.9	CCDC62	1.12701	1.66087e-08
ENSG00000135127.7	CCDC64	0.679858	1.51805e-27
ENSG00000162069.10	CCDC64B	1.11617	4.35843e-06
ENSG00000139537.6	CCDC65	1.40712	4.60384e-07
ENSG00000198624.8	CCDC69	-0.120045	1.4331e-05
ENSG00000177352.9	CCDC71	0.827733	4.61237e-26
ENSG00000163040.10	CCDC74A	1.13323	2.53822e-16
ENSG00000120647.5	CCDC77	-0.506641	3.60095e-08
ENSG00000162004.12	CCDC78	0.991303	1.77379e-46
ENSG00000249961.5	CCDC79	4.35851	0.00250701
ENSG00000169515.5	CCDC8	1.92803	2.52123e-05
ENSG00000175602.2	CCDC85B	0.76447	6.07403e-36
ENSG00000110104.7	CCDC86	0.223379	0.0224636
ENSG00000182791.3	CCDC87	1.37281	0.000339017
ENSG00000168071.17	CCDC88B	1.02945	3.4139e-68
ENSG00000015133.14	CCDC88C	-0.268517	3.43787e-17
ENSG00000105321.8	CCDC9	0.625411	5.14525e-18
ENSG00000123106.6	CCDC91	0.332068	0.000714341
ENSG00000119242.4	CCDC92	0.660852	0.000182837
ENSG00000125633.6	CCDC93	-0.260475	4.20083e-07
ENSG00000105248.11	CCDC94	-0.220765	0.0113564
ENSG00000173013.4	CCDC96	1.81259	1.89125e-29
ENSG00000142039.3	CCDC97	0.795421	1.34122e-38
ENSG00000204536.9	CCHCR1	0.461333	1.49153e-15
ENSG00000136280.11	CCM2	-1.0549	1.78393e-126
ENSG00000101331.11	CCM2L	-0.536277	5.75286e-05
ENSG00000145386.5	CCNA2	-1.01662	8.31108e-89
ENSG00000134057.10	CCNB1	-1.36284	2.51521e-92
ENSG00000100814.13	CCNB1IP1	-0.307756	4.67389e-07
ENSG00000157456.3	CCNB2	-1.04418	1.81695e-73
ENSG00000112237.8	CCNC	-0.679332	9.58146e-18
ENSG00000118971.3	CCND2	-4.47946	5.89232e-05
ENSG00000112576.8	CCND3	-0.772796	9.90714e-58
ENSG00000175305.12	CCNE2	0.782376	2.09221e-47
ENSG00000162063.8	CCNF	-0.933909	2.03003e-65
ENSG00000113328.14	CCNG1	-0.693206	4.88373e-21
ENSG00000134480.9	CCNH	-0.150122	0.0137332
ENSG00000118816.5	CCNI	-0.161226	3.64557e-05
ENSG00000107443.11	CCNJ	-0.18236	0.0191527
ENSG00000090061.13	CCNK	0.655469	6.40315e-22
ENSG00000163660.7	CCNL1	0.626612	2.91583e-53
ENSG00000221978.7	CCNL2	1.05852	1.20777e-184
ENSG00000152669.8	CCNO	2.18878	0.00449236
ENSG00000129315.5	CCNT1	-0.903884	6.37283e-44
ENSG00000082258.8	CCNT2	0.225164	0.000396625
ENSG00000108100.13	CCNY	-0.375291	1.05448e-15
ENSG00000163249.5	CCNYL1	0.83899	4.24582e-40
ENSG00000103540.12	CCP110	-0.531019	1.82578e-14
ENSG00000260916.1	CCPG1	0.37138	4.71392e-06
ENSG00000184451.5	CCR10	0.758092	1.25095e-14
ENSG00000151014.4	CCRN4L	0.749837	2.89816e-12
ENSG00000173992.4	CCS	0.802177	4.58587e-46
ENSG00000154429.6	CCSAP	-0.208043	0.00227435
ENSG00000107771.11	CCSER2	-0.381551	1.11454e-08
ENSG00000166226.8	CCT2	-0.865042	7.26781e-58
ENSG00000163468.10	CCT3	-0.606379	1.25679e-36
ENSG00000115484.10	CCT4	-0.343998	1.92311e-11
ENSG00000150753.7	CCT5	-0.664352	2.61719e-27
ENSG00000146731.6	CCT6A	-0.579654	7.97858e-28
ENSG00000132141.9	CCT6B	0.837607	3.73662e-11
ENSG00000135624.11	CCT7	-0.708321	3.95802e-60
ENSG00000156261.8	CCT8	-0.648424	4.97693e-36
ENSG00000122674.8	CCZ1	-0.418511	0.000527424
ENSG00000146574.11	CCZ1B	-0.349864	0.0018349
ENSG00000156535.9	CD109	1.60852	0.00999623
ENSG00000170458.9	CD14	1.84371	0.00418673
ENSG00000177697.13	CD151	2.38255	9.56616e-112
ENSG00000117281.11	CD160	2.02794	4.85254e-10
ENSG00000135535.10	CD164	-0.104283	0.019433
ENSG00000134061.4	CD180	-2.66631	7.56083e-61
ENSG00000177455.7	CD19	0.41678	6.69101e-33
ENSG00000158473.6	CD1D	0.651247	4.76822e-09
ENSG00000012124.10	CD22	0.319241	2.96364e-27
ENSG00000174807.3	CD248	1.13033	0.000157681
ENSG00000139193.3	CD27	-0.172854	0.000295869
ENSG00000103855.13	CD276	-2.88317	0.000946945
ENSG00000169217.4	CD2BP2	-0.106946	0.00726491
ENSG00000167775.6	CD320	-0.624461	9.65043e-25
ENSG00000104894.7	CD37	0.657313	1.35836e-44
ENSG00000004468.8	CD38	0.238422	4.13346e-16
ENSG00000026508.12	CD44	0.886597	0.0309844
ENSG00000117335.14	CD46	-0.128165	0.0440222
ENSG00000196776.10	CD47	-0.370373	1.71033e-10
ENSG00000117091.5	CD48	-0.54887	5.1002e-12
ENSG00000169442.4	CD52	-0.531818	5.07959e-21
ENSG00000143119.8	CD53	-0.692101	3.81515e-37
ENSG00000085063.10	CD59	0.218593	0.000467791
ENSG00000135404.7	CD63	-0.445853	7.00867e-12
ENSG00000125726.6	CD70	-0.413079	3.53119e-19
ENSG00000137101.8	CD72	-0.165572	0.0261904
ENSG00000019582.10	CD74	0.324078	0.000319112
ENSG00000105369.5	CD79A	-0.141664	0.0459477
ENSG00000007312.8	CD79B	-0.371824	1.20763e-40
ENSG00000110651.7	CD81	-0.296198	1.93445e-12
ENSG00000085117.7	CD82	-1.32068	1.24332e-39
ENSG00000112149.5	CD83	-0.610665	1.10201e-16
ENSG00000066294.10	CD84	-0.334383	0.0449097
ENSG00000153563.11	CD8A	3.13722	0.0278211
ENSG00000010278.7	CD9	-1.91186	0.00089439
ENSG00000102181.15	CD99L2	-0.521787	2.64557e-10
ENSG00000102543.10	CDADC1	0.628276	2.16196e-08
ENSG00000140326.8	CDAN1	0.190433	0.00335385
ENSG00000151465.9	CDC123	-0.684466	4.55735e-36
ENSG00000079335.13	CDC14A	-0.459481	2.0255e-06
ENSG00000130177.10	CDC16	-0.401786	1.84025e-09
ENSG00000117399.9	CDC20	-1.00237	5.24605e-89
ENSG00000164287.8	CDC20B	2.80347	4.65357e-05
ENSG00000094880.6	CDC23	-0.717819	1.91534e-28
ENSG00000164045.7	CDC25A	-0.866693	6.83724e-78
ENSG00000158402.14	CDC25C	0.727521	8.38631e-29
ENSG00000176386.4	CDC26	-0.42701	0.00181738
ENSG00000004897.7	CDC27	-1.25792	1.66852e-91
ENSG00000105401.2	CDC37	0.519749	6.10542e-40
ENSG00000106993.7	CDC37L1	0.432983	3.08816e-07
ENSG00000168438.10	CDC40	-1.04438	1.50439e-37
ENSG00000070831.11	CDC42	-0.424303	1.47088e-13
ENSG00000198752.5	CDC42BPB	0.352016	0.0396971
ENSG00000171219.8	CDC42BPG	-0.280383	6.64898e-06
ENSG00000167617.2	CDC42EP5	1.14249	0.0129526
ENSG00000197622.8	CDC42SE1	-0.855579	3.33337e-45
ENSG00000158985.9	CDC42SE2	-0.439256	2.72663e-17
ENSG00000093009.5	CDC45	-0.151268	0.00341202
ENSG00000096401.7	CDC5L	-0.699019	9.80774e-37
ENSG00000094804.5	CDC6	-0.228502	1.01112e-06
ENSG00000097046.8	CDC7	-0.751134	3.01075e-36
ENSG00000134371.9	CDC73	0.280089	5.90619e-06
ENSG00000184661.9	CDCA2	-0.759178	2.53167e-34
ENSG00000111665.7	CDCA3	-0.18901	0.000147364
ENSG00000170779.10	CDCA4	-0.13297	0.00440539
ENSG00000146670.5	CDCA5	-0.850672	1.45864e-97
ENSG00000144354.9	CDCA7	-0.200553	2.41433e-06
ENSG00000164649.15	CDCA7L	-0.636361	2.18539e-32
ENSG00000134690.6	CDCA8	-0.5977	2.99085e-21
ENSG00000039068.14	CDH1	4.92335	0.000666192
ENSG00000140937.9	CDH11	-3.65565	0.00783822
ENSG00000140945.11	CDH13	-3.54601	0.0119219
ENSG00000129910.3	CDH15	1.69701	0.0381948
ENSG00000079112.5	CDH17	3.37685	0.0354101
ENSG00000170558.4	CDH2	-3.30038	5.48134e-08
ENSG00000107736.15	CDH23	0.568904	6.34266e-09
ENSG00000139880.15	CDH24	1.37997	4.75071e-20
ENSG00000124215.12	CDH26	1.1687	0.000922612
ENSG00000074276.6	CDHR2	1.25412	2.65732e-28
ENSG00000128536.11	CDHR3	1.03637	4.44368e-55
ENSG00000187492.4	CDHR4	1.86203	0.00719892
ENSG00000099834.14	CDHR5	1.66978	3.00413e-30
ENSG00000170312.11	CDK1	-1.00017	3.96203e-64
ENSG00000185324.17	CDK10	0.613355	1.47022e-36
ENSG00000008128.18	CDK11A	1.27963	2.05504e-24
ENSG00000248333.3	CDK11B	0.558693	1.61584e-18
ENSG00000167258.9	CDK12	0.498092	6.7694e-35
ENSG00000065883.10	CDK13	0.464712	4.75789e-57
ENSG00000102225.11	CDK16	0.13103	0.00640663
ENSG00000117266.11	CDK18	1.15484	2.76973e-29
ENSG00000155111.10	CDK19	-0.124955	0.005289
ENSG00000123374.6	CDK2	-0.382618	4.80559e-10
ENSG00000156345.13	CDK20	-0.381455	5.54155e-05
ENSG00000111328.2	CDK2AP1	0.21872	0.00993067
ENSG00000167797.3	CDK2AP2	0.817637	2.1114e-69
ENSG00000135446.12	CDK4	-0.110481	0.0222627
ENSG00000164885.8	CDK5	-0.392758	1.75902e-05
ENSG00000176749.4	CDK5R1	0.680243	0.00196482
ENSG00000136861.13	CDK5RAP2	-0.421846	3.96446e-28
ENSG00000108465.10	CDK5RAP3	0.519997	1.26601e-34
ENSG00000105810.5	CDK6	-0.700266	3.66423e-64
ENSG00000134058.6	CDK7	-0.805549	3.76111e-31
ENSG00000136807.7	CDK9	0.16666	0.00105101
ENSG00000145996.7	CDKAL1	-0.182232	0.00550449
ENSG00000006837.7	CDKL3	1.52387	2.82054e-21
ENSG00000008086.6	CDKL5	0.863498	1.07913e-06
ENSG00000124762.9	CDKN1A	0.97434	3.62964e-08
ENSG00000111276.6	CDKN1B	-0.984394	8.33095e-68
ENSG00000147889.12	CDKN2A	0.692739	3.30291e-33
ENSG00000168564.5	CDKN2AIP	-0.182882	6.60703e-05
ENSG00000147883.9	CDKN2B	2.14822	2.63798e-145
ENSG00000123080.6	CDKN2C	0.32718	3.63936e-17
ENSG00000100526.15	CDKN3	-1.14927	1.64885e-83
ENSG00000185267.5	CDNF	1.28009	2.66966e-14
ENSG00000205643.6	CDPF1	0.260532	0.00207714
ENSG00000140743.3	CDR2	-0.503367	5.49289e-18
ENSG00000109089.7	CDR2L	0.912284	0.0227229
ENSG00000101290.9	CDS2	-0.387708	2.37186e-21
ENSG00000167513.4	CDT1	0.269808	8.56352e-08
ENSG00000091527.11	CDV3	-0.568131	3.03415e-25
ENSG00000153046.13	CDYL	-0.135704	0.0209974
ENSG00000079385.17	CEACAM1	1.12566	0.00160221
ENSG00000007129.13	CEACAM21	-0.222155	0.0183115
ENSG00000086548.8	CEACAM6	4.8679	0.000308783
ENSG00000245848.2	CEBPA	2.02807	0.020199
ENSG00000221869.4	CEBPD	1.39999	0.0233074
ENSG00000153879.4	CEBPG	-0.393928	1.04909e-29
ENSG00000115816.9	CEBPZ	-0.578694	5.93431e-16
ENSG00000093072.11	CECR1	0.261202	5.18008e-08
ENSG00000099954.14	CECR2	0.369639	0.00261438
ENSG00000069998.8	CECR5	-0.340501	4.79081e-08
ENSG00000170835.10	CEL	2.35834	3.3219e-28
ENSG00000149187.13	CELF1	-0.188366	1.49547e-06
ENSG00000048740.13	CELF2	-4.23051	0.000205882
ENSG00000075275.12	CELSR1	0.184633	0.0167492
ENSG00000143126.7	CELSR2	0.762346	1.84145e-23
ENSG00000008300.10	CELSR3	0.788019	1.62095e-33
ENSG00000115163.10	CENPA	-0.550275	5.96347e-12
ENSG00000177946.4	CENPBD1	0.486847	0.00881437
ENSG00000138778.7	CENPE	-1.30503	1.44641e-72
ENSG00000117724.8	CENPF	-1.26095	3.60293e-153
ENSG00000153044.5	CENPH	-0.163486	0.0288529
ENSG00000151849.10	CENPJ	0.216254	0.00190376
ENSG00000123219.8	CENPK	-0.451044	6.38607e-12
ENSG00000120334.11	CENPL	-0.80896	4.81814e-32
ENSG00000166451.9	CENPN	-0.179259	0.00722421
ENSG00000188312.9	CENPP	0.30527	6.52676e-05
ENSG00000031691.6	CENPQ	-0.217712	0.0199663
ENSG00000102901.8	CENPT	0.340079	1.96204e-14
ENSG00000166582.5	CENPV	0.507807	2.66295e-09
ENSG00000203760.4	CENPW	-0.63918	8.5631e-12
ENSG00000100629.12	CEP128	0.819224	2.2935e-50
ENSG00000174799.6	CEP135	-0.327673	2.33778e-06
ENSG00000103995.9	CEP152	0.358143	3.62475e-06
ENSG00000110274.10	CEP164	-0.145554	0.0214172
ENSG00000143702.11	CEP170	-0.196284	0.000535668
ENSG00000099814.11	CEP170B	1.44512	1.46513e-05
ENSG00000174007.7	CEP19	-0.587147	2.78406e-13
ENSG00000101639.14	CEP192	-0.196411	0.000182504
ENSG00000126001.11	CEP250	0.29871	1.06137e-06
ENSG00000135837.11	CEP350	-0.733435	1.90034e-39
ENSG00000106477.14	CEP41	-0.201913	0.00254682
ENSG00000164118.8	CEP44	-0.464443	1.2874e-14
ENSG00000138180.11	CEP55	-0.935593	2.78656e-28
ENSG00000166037.6	CEP57	-0.749936	3.44038e-44
ENSG00000183137.10	CEP57L1	-0.400613	8.86482e-06
ENSG00000182923.12	CEP63	-0.116757	0.0469075
ENSG00000112877.6	CEP72	0.554867	3.53119e-19
ENSG00000101624.6	CEP76	-0.391928	0.000301184
ENSG00000148019.8	CEP78	-0.308503	1.85796e-09
ENSG00000130695.9	CEP85	-0.153876	0.0167742
ENSG00000111860.9	CEP85L	0.218174	0.000920085
ENSG00000121289.13	CEP89	0.353631	8.10058e-07
ENSG00000258890.2	CEP95	-0.57265	3.0735e-16
ENSG00000182504.6	CEP97	-0.704067	1.11424e-21
ENSG00000134255.9	CEPT1	-0.65087	1.40122e-22
ENSG00000167123.14	CERCAM	0.997138	5.91047e-11
ENSG00000100422.9	CERK	-0.520019	4.02818e-39
ENSG00000188452.9	CERKL	-1.0026	5.96906e-13
ENSG00000223802.3	CERS1	1.87934	0.00666695
ENSG00000090661.7	CERS4	0.281173	1.15492e-09
ENSG00000139624.8	CERS5	0.282985	6.41092e-05
ENSG00000172831.7	CES2	0.554591	1.13195e-14
ENSG00000172824.10	CES4A	-0.846421	0.000472478
ENSG00000153140.4	CETN3	-0.793246	2.40805e-21
ENSG00000000971.11	CFH	6.69784	5.50867e-09
ENSG00000172757.8	CFL1	0.228296	2.23192e-08
ENSG00000165410.10	CFL2	0.406666	2.79029e-05
ENSG00000003402.15	CFLAR	0.19917	3.49248e-07
ENSG00000126759.8	CFP	1.80404	4.55955e-06
ENSG00000163320.6	CGGBP1	-0.560379	1.81405e-32
ENSG00000100532.7	CGRRF1	-0.785986	1.45052e-13
ENSG00000128965.7	CHAC1	0.793882	5.27143e-103
ENSG00000143942.4	CHAC2	-0.649111	9.34151e-10
ENSG00000136457.5	CHAD	-0.857915	0.021151
ENSG00000167670.11	CHAF1A	-0.120588	0.0055989
ENSG00000159259.7	CHAF1B	-0.470525	8.21593e-12
ENSG00000198824.4	CHAMP1	-0.519612	5.10558e-09
ENSG00000172586.7	CHCHD1	-0.217693	0.000528883
ENSG00000250479.4	CHCHD10	0.554935	0.000561487
ENSG00000106153.12	CHCHD2	-0.116604	0.0244739
ENSG00000106554.7	CHCHD3	-0.333115	2.0935e-12
ENSG00000163528.8	CHCHD4	-0.931783	5.53957e-21
ENSG00000125611.11	CHCHD5	-0.391973	3.32244e-06
ENSG00000159685.6	CHCHD6	-0.336071	0.0446915
ENSG00000170791.13	CHCHD7	0.601208	7.11958e-46
ENSG00000153922.6	CHD1	-1.30057	3.3455e-34
ENSG00000131778.13	CHD1L	-1.09564	9.95509e-44
ENSG00000173575.14	CHD2	-0.447129	3.05072e-40
ENSG00000170004.12	CHD3	0.781232	1.57481e-31
ENSG00000111642.10	CHD4	-0.142929	5.8883e-05
ENSG00000171316.7	CHD7	-0.502266	1.32333e-39
ENSG00000100888.8	CHD8	-1.01947	3.75239e-132
ENSG00000177200.11	CHD9	-0.56301	1.61854e-27
ENSG00000183765.16	CHEK2	-0.746331	1.50203e-18
ENSG00000085872.10	CHERP	0.863229	1.81452e-31
ENSG00000133048.8	CHI3L1	-8.59652	4.00514e-16
ENSG00000064886.9	CHI3L2	-2.29367	8.20112e-28
ENSG00000204116.7	CHIC1	-0.402508	0.00115391
ENSG00000177830.13	CHID1	0.241766	2.47878e-05
ENSG00000133063.11	CHIT1	0.786056	6.46768e-14
ENSG00000110721.7	CHKA	0.322459	0.0262469
ENSG00000134121.5	CHL1	1.30485	3.99858e-09
ENSG00000203668.1	CHML	-0.817612	4.0833e-27
ENSG00000131165.10	CHMP1A	-0.358815	1.87065e-11
ENSG00000255112.2	CHMP1B	0.51993	2.90863e-20
ENSG00000130724.4	CHMP2A	0.505075	7.42776e-16
ENSG00000083937.4	CHMP2B	-0.491347	9.76749e-10
ENSG00000115561.10	CHMP3	0.207462	0.0137753
ENSG00000254505.4	CHMP4A	1.35567	5.35671e-18
ENSG00000101421.3	CHMP4B	0.254552	3.81815e-12
ENSG00000086065.9	CHMP5	-0.376665	7.76739e-08
ENSG00000176108.5	CHMP6	1.04302	6.30566e-37
ENSG00000147457.9	CHMP7	-0.267597	1.59865e-12
ENSG00000128656.9	CHN1	-1.55171	0.0357137
ENSG00000110172.7	CHORDC1	0.128259	0.0391269
ENSG00000187446.7	CHP1	-0.381928	1.33198e-13
ENSG00000123989.9	CHPF	0.447476	6.95329e-12
ENSG00000033100.10	CHPF2	0.631084	8.15466e-71
ENSG00000111666.6	CHPT1	-0.171615	0.0472264
ENSG00000104472.5	CHRAC1	0.376425	1.16131e-07
ENSG00000090539.11	CHRD	1.49203	0.0197394
ENSG00000133019.7	CHRM3	-3.42862	0.0159395
ENSG00000180720.6	CHRM4	1.44546	0.0351846
ENSG00000120903.6	CHRNA2	-0.975631	0.0199971
ENSG00000147434.4	CHRNA6	-0.629128	4.13442e-06
ENSG00000170175.6	CHRNB1	-0.970837	1.56821e-11
ENSG00000160716.4	CHRNB2	1.63799	1.42288e-29
ENSG00000135902.5	CHRND	1.53743	0.000236118
ENSG00000196811.7	CHRNG	1.19777	2.26209e-16
ENSG00000115526.6	CHST10	-0.966994	1.79158e-34
ENSG00000171310.6	CHST11	-1.30222	3.35301e-15
ENSG00000136213.7	CHST12	0.423427	6.60675e-13
ENSG00000169105.6	CHST14	0.244726	0.00614811
ENSG00000182022.13	CHST15	0.392469	2.6697e-20
ENSG00000175040.4	CHST2	0.791146	0.01451
ENSG00000122863.5	CHST3	-2.9866	0.000132536
ENSG00000140835.8	CHST4	0.430365	0.00332398
ENSG00000183196.4	CHST6	1.28847	0.00010298
ENSG00000147119.3	CHST7	0.335764	0.000117814
ENSG00000131873.5	CHSY1	-0.556489	6.76666e-12
ENSG00000127586.12	CHTF18	0.806517	1.59023e-66
ENSG00000168802.8	CHTF8	-1.3486	5.60481e-102
ENSG00000160679.8	CHTOP	-0.775127	2.28419e-27
ENSG00000213341.6	CHUK	-0.681111	4.5746e-25
ENSG00000258289.3	CHURC1	-0.357963	1.32736e-08
ENSG00000144021.2	CIAO1	-0.167125	0.000806857
ENSG00000005194.10	CIAPIN1	-0.85064	6.58087e-24
ENSG00000185043.6	CIB1	-0.266624	0.000902464
ENSG00000079432.3	CIC	0.880822	2.77869e-38
ENSG00000179583.13	CIITA	0.886066	1.21824e-44
ENSG00000138615.4	CILP	3.15642	0.040229
ENSG00000160161.5	CILP2	2.02993	4.13392e-06
ENSG00000100865.10	CINP	-0.45381	1.357e-10
ENSG00000138433.11	CIR1	-0.241467	0.0225813
ENSG00000141076.13	CIRH1A	-0.498713	2.99763e-12
ENSG00000122873.7	CISD1	-0.234473	0.000927409
ENSG00000114737.11	CISH	2.44039	1.62111e-05
ENSG00000164442.8	CITED2	1.27804	2.22272e-103
ENSG00000179862.5	CITED4	2.59662	0.00193021
ENSG00000148337.15	CIZ1	0.616077	5.97032e-16
ENSG00000136108.10	CKAP2	-0.986321	3.62394e-73
ENSG00000169607.8	CKAP2L	-1.05184	1.33445e-69
ENSG00000136026.9	CKAP4	-0.294155	8.62387e-05
ENSG00000175216.10	CKAP5	-1.11851	2.19452e-124
ENSG00000166165.8	CKB	-1.34801	4.3652e-35
ENSG00000217555.8	CKLF	-0.734693	2.86089e-11
ENSG00000104879.4	CKM	2.5314	9.30918e-05
ENSG00000223572.5	CKMT1A	-3.62666	0.000152787
ENSG00000237289.5	CKMT1B	-4.83952	2.66359e-05
ENSG00000173207.8	CKS1B	-0.538573	4.35718e-50
ENSG00000123975.4	CKS2	-0.809077	5.48627e-73
ENSG00000074054.13	CLASP1	-0.209626	5.35516e-07
ENSG00000163539.11	CLASP2	-0.368521	2.62487e-14
ENSG00000104859.10	CLASRP	0.416686	4.57546e-15
ENSG00000175505.9	CLCF1	1.41025	0.00517929
ENSG00000114859.10	CLCN2	1.5844	1.74744e-40
ENSG00000109572.9	CLCN3	-0.655849	1.37535e-44
ENSG00000073464.7	CLCN4	-0.719298	3.09995e-18
ENSG00000171365.11	CLCN5	-0.44933	2.479e-06
ENSG00000011021.17	CLCN6	0.684772	6.37177e-13
ENSG00000103249.13	CLCN7	0.825887	5.12164e-79
ENSG00000163347.5	CLDN1	3.63317	0.0201577
ENSG00000013297.6	CLDN11	2.02761	0.000275658
ENSG00000157224.11	CLDN12	-0.510557	0.00125737
ENSG00000106404.9	CLDN15	0.590664	5.79323e-16
ENSG00000165376.6	CLDN2	3.65536	0.00701951
ENSG00000184113.8	CLDN5	1.0864	3.51334e-06
ENSG00000181885.14	CLDN7	1.38742	2.69046e-06
ENSG00000213937.3	CLDN9	2.57165	3.06838e-10
ENSG00000080822.12	CLDND1	-0.501993	4.06914e-10
ENSG00000160318.2	CLDND2	1.32525	9.4246e-24
ENSG00000038532.10	CLEC16A	0.244944	1.15146e-07
ENSG00000187912.7	CLEC17A	-2.8516	2.24135e-05
ENSG00000157322.12	CLEC18A	1.71478	1.48912e-05
ENSG00000140839.7	CLEC18B	2.49538	1.2791e-08
ENSG00000110852.4	CLEC2B	1.01685	3.83582e-06
ENSG00000069493.10	CLEC2D	-0.816662	9.6576e-37
ENSG00000184293.3	CLECL1	-1.22239	4.48163e-12
ENSG00000153132.8	CLGN	1.70203	3.68313e-63
ENSG00000162994.11	CLHC1	0.441516	0.000160275
ENSG00000213719.4	CLIC1	-0.179905	0.000251502
ENSG00000169583.12	CLIC3	1.46894	1.22055e-08
ENSG00000169504.10	CLIC4	-0.280733	1.4253e-07
ENSG00000113282.9	CLINT1	-0.613486	1.66256e-44
ENSG00000130779.15	CLIP1	0.303799	4.3797e-06
ENSG00000105270.10	CLIP3	1.02718	1.45432e-18
ENSG00000176444.14	CLK2	0.537257	4.69817e-28
ENSG00000113240.8	CLK4	-0.160608	0.0100648
ENSG00000128973.7	CLN6	0.176031	0.000390965
ENSG00000182372.6	CLN8	0.891126	4.25607e-26
ENSG00000074201.4	CLNS1A	-0.386957	2.17042e-10
ENSG00000162129.8	CLPB	-0.460048	2.56417e-11
ENSG00000125656.4	CLPP	-0.134424	0.0130432
ENSG00000104853.11	CLPTM1	0.310962	0.000217551
ENSG00000166855.5	CLPX	-0.240236	0.000143991
ENSG00000092853.9	CLSPN	-0.193851	3.67028e-06
ENSG00000171603.12	CLSTN1	-0.267904	5.17329e-07
ENSG00000139182.9	CLSTN3	0.545008	2.62246e-19
ENSG00000122705.12	CLTA	-0.127011	0.00387059
ENSG00000175416.8	CLTB	0.135929	0.0357381
ENSG00000141367.7	CLTC	-0.57637	6.07894e-38
ENSG00000070371.11	CLTCL1	-0.417365	1.83579e-05
ENSG00000120885.15	CLU	-1.12054	3.5038e-08
ENSG00000132361.12	CLUH	0.243356	3.8816e-05
ENSG00000125246.11	CLYBL	0.562066	3.87191e-08
ENSG00000111726.8	CMAS	-0.327233	3.50735e-05
ENSG00000187118.8	CMC1	-0.266197	0.00173251
ENSG00000103121.4	CMC2	-0.885143	3.59569e-26
ENSG00000153815.12	CMIP	0.422146	7.44897e-09
ENSG00000162368.9	CMPK1	-0.415513	2.01805e-13
ENSG00000134326.7	CMPK2	4.95582	0.000279462
ENSG00000184220.6	CMSS1	-0.47586	6.25164e-13
ENSG00000089505.13	CMTM1	-0.495628	0.000186276
ENSG00000140932.5	CMTM2	2.70303	0.0169688
ENSG00000091317.7	CMTM6	-0.878006	6.19078e-31
ENSG00000153551.9	CMTM7	-0.88873	1.56588e-25
ENSG00000170293.4	CMTM8	-4.96621	1.01666e-05
ENSG00000137200.8	CMTR1	-0.32803	8.97706e-17
ENSG00000180917.12	CMTR2	-0.609177	4.16341e-14
ENSG00000176571.7	CNBD1	1.4848	4.14031e-21
ENSG00000169714.12	CNBP	-0.279712	6.16992e-09
ENSG00000150656.10	CNDP1	2.91209	0.0444727
ENSG00000132259.8	CNGA4	1.5207	0.0169347
ENSG00000170289.8	CNGB3	1.28782	1.0948e-48
ENSG00000100528.7	CNIH1	-0.532391	2.48268e-12
ENSG00000174871.6	CNIH2	2.07016	3.05945e-30
ENSG00000143786.3	CNIH3	0.968895	1.86441e-12
ENSG00000143771.7	CNIH4	-0.205118	0.0012879
ENSG00000142675.13	CNKSR1	0.784296	1.05387e-05
ENSG00000130176.3	CNN1	2.4935	0.000258334
ENSG00000064666.10	CNN2	0.14694	0.0243302
ENSG00000117519.11	CNN3	-3.06128	4.67276e-12
ENSG00000148842.13	CNNM2	0.719448	1.85523e-36
ENSG00000168763.11	CNNM3	0.493566	8.26277e-06
ENSG00000158158.7	CNNM4	1.02095	4.7144e-54
ENSG00000125107.12	CNOT1	-0.865569	7.85146e-154
ENSG00000182973.14	CNOT10	-0.150986	0.00187554
ENSG00000111596.7	CNOT2	-0.431568	4.91972e-14
ENSG00000088038.13	CNOT3	0.768368	2.68011e-39
ENSG00000080802.14	CNOT4	0.17388	0.00473747
ENSG00000138767.8	CNOT6L	-0.93234	8.09342e-54
ENSG00000198791.7	CNOT7	-0.860833	1.38887e-32
ENSG00000155508.9	CNOT8	-0.747299	9.82222e-26
ENSG00000173786.12	CNP	0.249219	1.57899e-07
ENSG00000257727.1	CNPY2	0.239846	0.0301175
ENSG00000137161.12	CNPY3	0.162129	0.00039436
ENSG00000118432.11	CNR1	-0.131329	0.000180187
ENSG00000188822.6	CNR2	-0.209844	0.0114281
ENSG00000162852.9	CNST	-0.770503	6.54146e-38
ENSG00000105219.4	CNTD2	2.93157	1.38587e-05
ENSG00000044459.10	CNTLN	0.246708	0.00315742
ENSG00000018236.10	CNTN1	3.46038	9.93032e-10
ENSG00000108797.7	CNTNAP1	0.574747	4.5823e-08
ENSG00000174469.13	CNTNAP2	-1.52005	1.35809e-06
ENSG00000106714.13	CNTNAP3	4.21021	0.00318917
ENSG00000154529.10	CNTNAP3B	4.38127	0.00144916
ENSG00000152910.14	CNTNAP4	1.59079	2.47359e-22
ENSG00000119397.12	CNTRL	-0.585574	2.81457e-51
ENSG00000106603.13	COA1	-0.404519	4.56329e-14
ENSG00000183978.7	COA3	-0.521516	6.18639e-12
ENSG00000181924.6	COA4	-0.18599	0.0202326
ENSG00000183513.4	COA5	0.344859	1.13332e-06
ENSG00000168275.10	COA6	-0.319646	0.000283443
ENSG00000068120.10	COASY	0.292557	1.49182e-06
ENSG00000106078.13	COBL	-3.56823	0.00280308
ENSG00000082438.11	COBLL1	-0.243668	0.000666598
ENSG00000100473.11	COCH	0.199494	0.000195001
ENSG00000166685.7	COG1	0.463796	2.11767e-12
ENSG00000135775.9	COG2	-0.972435	5.30513e-41
ENSG00000103051.14	COG4	-0.248585	2.0547e-07
ENSG00000164597.9	COG5	0.337652	2.62752e-07
ENSG00000133103.12	COG6	-0.265081	0.00186039
ENSG00000168434.8	COG7	0.369002	0.000117384
ENSG00000213380.9	COG8	0.474831	7.66238e-15
ENSG00000121058.4	COIL	-0.933163	5.39797e-23
ENSG00000060718.14	COL11A1	-4.1115	3.97621e-07
ENSG00000204248.6	COL11A2	2.2114	5.20749e-39
ENSG00000187955.7	COL14A1	1.61562	4.0902e-27
ENSG00000065618.12	COL17A1	-2.08676	0.0474734
ENSG00000108821.9	COL1A1	1.80536	0.0243066
ENSG00000101203.12	COL20A1	2.67441	2.22377e-09
ENSG00000169436.12	COL22A1	-3.74456	0.00522522
ENSG00000139219.13	COL2A1	0.916737	0.0343955
ENSG00000187498.10	COL4A1	-1.83902	0.00419254
ENSG00000134871.13	COL4A2	0.494908	0.00431653
ENSG00000169031.14	COL4A3	0.694585	1.71587e-28
ENSG00000081052.10	COL4A4	0.467829	8.0646e-15
ENSG00000204262.7	COL5A2	0.995609	0.00032977
ENSG00000142156.10	COL6A1	-4.573	6.78301e-05
ENSG00000142173.10	COL6A2	-2.48354	0.00107801
ENSG00000114270.11	COL7A1	2.29481	3.12493e-56
ENSG00000171812.6	COL8A2	2.30822	2.5526e-15
ENSG00000092758.11	COL9A3	-0.841946	6.705e-15
ENSG00000118004.13	COLEC11	2.59968	0.0102707
ENSG00000130309.6	COLGALT1	0.419415	1.14381e-13
ENSG00000206561.8	COLQ	2.02754	7.82705e-07
ENSG00000173163.6	COMMD1	0.561542	1.58228e-07
ENSG00000114744.4	COMMD2	-0.258512	0.000252576
[truncated: 8,076 more rows]

## Sheet: WT vs. 4A-2
Feature	Feature_gene_name	log2FoldChange	padj
ENSG00000145416.9	MARCH1	-0.332408	0.00185896
ENSG00000099785.6	MARCH2	0.328565	0.000279309
ENSG00000173926.5	MARCH3	0.233603	2.3948e-06
ENSG00000198060.5	MARCH5	0.244836	0.000126563
ENSG00000145495.10	MARCH6	0.206674	1.79843e-09
ENSG00000136536.10	MARCH7	-0.372131	1.48227e-08
ENSG00000165406.11	MARCH8	-0.331709	3.89348e-10
ENSG00000180096.7	SEPT1	0.848555	3.28028e-27
ENSG00000168385.13	SEPT2	0.1687	0.000228855
ENSG00000100167.15	SEPT3	1.1042	0.00104413
ENSG00000108387.10	SEPT4	2.2788	1.59606e-10
ENSG00000184702.13	SEPT5	-3.76772	0.00266052
ENSG00000125354.18	SEPT6	0.285282	1.74587e-14
ENSG00000122545.13	SEPT7	-0.3417	1.19279e-08
ENSG00000184640.13	SEPT9	0.153182	1.2157e-06
ENSG00000140623.9	SEPT12	3.32123	0.0265173
ENSG00000183291.11	SEPT15	0.450929	1.22619e-28
ENSG00000121410.7	A1BG	1.30139	1.17559e-07
ENSG00000175899.10	A2M	-1.16758	4.54021e-05
ENSG00000128274.11	A4GALT	-0.562625	2.95162e-34
ENSG00000081760.12	AACS	0.361674	1.04743e-13
ENSG00000158122.7	AAED1	-0.724345	2.51577e-10
ENSG00000103591.8	AAGAB	-0.1912	0.00310314
ENSG00000087884.10	AAMDC	0.420013	0.000599872
ENSG00000131043.7	AAR2	-0.89315	1.15721e-19
ENSG00000090861.11	AARS	-0.356537	3.36094e-25
ENSG00000124608.4	AARS2	0.199081	0.000674985
ENSG00000266967.2	AARSD1	0.548193	0.0367177
ENSG00000157426.9	AASDH	-0.344672	0.000208182
ENSG00000149313.6	AASDHPPT	-0.486807	7.47573e-09
ENSG00000008311.10	AASS	-3.71332	0.00188518
ENSG00000108270.6	AATF	-0.262904	7.90128e-06
ENSG00000181409.7	AATK	1.30546	0.0192803
ENSG00000165029.11	ABCA1	-0.238974	1.17099e-07
ENSG00000107331.12	ABCA2	0.94808	3.06153e-26
ENSG00000167972.9	ABCA3	-0.69161	4.97403e-05
ENSG00000154265.11	ABCA5	0.577466	1.29597e-06
ENSG00000064687.8	ABCA7	0.811591	5.1847e-88
ENSG00000154258.12	ABCA9	2.27497	4.46948e-08
ENSG00000135776.4	ABCB10	0.15898	0.0229125
ENSG00000005471.11	ABCB4	1.05291	1.5665e-10
ENSG00000197150.8	ABCB8	0.495728	2.3917e-19
ENSG00000103222.14	ABCC1	0.367483	1.33308e-25
ENSG00000124574.10	ABCC10	0.375879	1.05259e-06
ENSG00000121270.11	ABCC11	2.16176	0.0114415
ENSG00000023839.6	ABCC2	1.40648	7.72655e-13
ENSG00000108846.11	ABCC3	3.54852	9.77703e-11
ENSG00000125257.9	ABCC4	-0.725042	6.08433e-28
ENSG00000114770.12	ABCC5	0.139989	0.0442733
ENSG00000101986.8	ABCD1	0.98148	6.78391e-39
ENSG00000173208.3	ABCD2	-1.29079	0.0225032
ENSG00000117528.7	ABCD3	-0.167008	0.0134366
ENSG00000119688.16	ABCD4	0.345188	2.93921e-08
ENSG00000164163.6	ABCE1	-0.956495	9.1384e-34
ENSG00000204574.8	ABCF1	-0.179774	0.00120065
ENSG00000033050.3	ABCF2	-0.716644	4.18254e-52
ENSG00000160179.14	ABCG1	0.348762	1.03495e-10
ENSG00000118777.6	ABCG2	4.23981	0.00150484
ENSG00000143994.9	ABHD1	0.811375	3.85419e-07
ENSG00000106077.14	ABHD11	0.642756	1.15941e-16
ENSG00000100997.14	ABHD12	0.478842	3.15997e-08
ENSG00000248487.4	ABHD14A	-0.77276	6.8512e-10
ENSG00000168792.4	ABHD15	0.237035	0.000439603
ENSG00000204427.7	ABHD16A	0.297272	0.0438775
ENSG00000183260.5	ABHD16B	0.457578	0.000188956
ENSG00000129968.11	ABHD17A	0.253278	0.000120699
ENSG00000107362.9	ABHD17B	-0.345058	3.99297e-09
ENSG00000136379.7	ABHD17C	-0.891633	0.00112463
ENSG00000100439.6	ABHD4	0.759385	2.12063e-08
ENSG00000011198.3	ABHD5	-1.28569	1.0542e-17
ENSG00000163686.9	ABHD6	-0.987739	4.49018e-28
ENSG00000127220.5	ABHD8	0.307153	4.58863e-11
ENSG00000136754.12	ABI1	-0.336448	9.74858e-13
ENSG00000138443.11	ABI2	-0.543357	7.62698e-28
ENSG00000097007.13	ABL1	-0.476373	1.44191e-12
ENSG00000143322.15	ABL2	-0.733131	5.58763e-32
ENSG00000099204.14	ABLIM1	-0.662277	4.4328e-70
ENSG00000159842.10	ABR	0.248885	1.05321e-06
ENSG00000146386.7	ABRACL	-0.287026	0.000103247
ENSG00000146109.3	ABT1	-0.374675	9.6978e-12
ENSG00000114626.13	ABTB1	0.875704	6.8075e-19
ENSG00000005189.15	AC004381.6	0.454519	4.40675e-06
ENSG00000213888.2	AC005003.1	0.564803	4.05201e-12
ENSG00000206044.3	AC005841.1	0.996835	0.0228542
ENSG00000204957.1	AC006486.1	1.07434	3.11224e-22
ENSG00000214109.3	AC008686.1	1.82281	0.00236107
ENSG00000216895.4	AC009403.2	0.551553	2.07926e-16
ENSG00000214248.2	AC010336.1	0.443445	0.0198125
ENSG00000267216.1	AC010642.1	1.16078	3.03605e-16
ENSG00000213922.1	AC011500.1	1.48877	0.0346027
ENSG00000269855.1	AC012313.1	1.74444	5.52336e-06
ENSG00000268396.1	AC012485.1	2.47698	0.00083641
ENSG00000231145.1	AC013468.1	3.23333	0.0141677
ENSG00000268012.1	AC016559.1	-3.33227	0.0228542
ENSG00000205147.3	AC016586.1	2.39737	1.47081e-07
ENSG00000186235.6	AC016757.3	3.46611	4.22436e-05
ENSG00000233538.1	AC017104.2	1.94168	2.15581e-11
ENSG00000235978.2	AC018816.3	-1.74263	0.00440058
ENSG00000268328.1	AC019206.1	1.26197	2.55209e-16
ENSG00000256530.1	AC019294.1	1.27395	0.00566469
ENSG00000225885.2	AC023590.1	0.671246	7.88104e-05
ENSG00000177340.4	AC024940.1	1.36757	5.3326e-73
ENSG00000268885.1	AC026740.1	0.412624	0.00950981
ENSG00000268838.1	AC027228.1	2.1288	0.000351722
ENSG00000268798.1	AC027307.3	1.70311	1.68692e-14
ENSG00000215067.5	AC027763.2	0.616727	0.00436908
ENSG00000222020.2	AC062017.1	1.10155	3.16915e-20
ENSG00000269165.1	AC069547.1	-0.791529	0.0245648
ENSG00000237452.2	AC074212.3	0.953155	0.0302986
ENSG00000269657.1	AC079210.1	2.5879	0.00133086
ENSG00000214708.4	AC090616.2	0.994909	0.0151208
ENSG00000203691.2	AC092811.1	-0.631905	0.0258012
ENSG00000269559.1	AC093677.1	1.01862	2.78502e-06
ENSG00000269302.1	AC110771.1	0.604136	5.2178e-06
ENSG00000269506.1	AC110792.1	1.73713	0.0078418
ENSG00000204620.2	AC115618.1	0.73345	6.03334e-06
ENSG00000268367.1	AC126614.1	1.56395	0.0337975
ENSG00000216921.3	AC131097.4	1.90132	0.0063163
ENSG00000183562.2	AC131971.1	1.38526	6.87654e-28
ENSG00000268403.1	AC132192.1	1.09729	4.09565e-09
ENSG00000184566.2	AC132216.1	-1.38707	7.07491e-06
ENSG00000268218.1	AC137932.1	-0.933451	2.82344e-07
ENSG00000269563.1	AC138655.1	1.09929	5.15186e-05
ENSG00000267270.1	AC139100.2	1.61163	5.15376e-27
ENSG00000269529.1	AC140061.12	3.45379	0.0314468
ENSG00000060971.13	ACAA1	0.379544	1.42071e-06
ENSG00000167315.13	ACAA2	-0.431029	2.90139e-20
ENSG00000132142.15	ACACA	-0.340249	1.21247e-14
ENSG00000076555.11	ACACB	0.461786	1.62153e-18
ENSG00000111271.10	ACAD10	0.373184	3.60933e-10
ENSG00000177646.13	ACAD9	0.32932	2.2981e-08
ENSG00000117054.9	ACADM	-0.238601	1.93447e-07
ENSG00000196177.8	ACADSB	0.176757	0.0470086
ENSG00000072778.15	ACADVL	0.600677	2.16304e-35
ENSG00000072818.7	ACAP1	0.352766	8.15998e-22
ENSG00000131584.14	ACAP3	0.811813	1.78251e-45
ENSG00000075239.9	ACAT1	0.235311	0.00084236
ENSG00000120437.7	ACAT2	0.194626	0.00314317
ENSG00000181513.10	ACBD4	0.36767	8.40402e-10
ENSG00000107897.14	ACBD5	-0.311697	1.20828e-06
ENSG00000176244.6	ACBD7	0.764663	1.19158e-16
ENSG00000102977.9	ACD	0.588241	9.82998e-32
ENSG00000159640.10	ACE	0.463333	8.84684e-05
ENSG00000177076.4	ACER2	0.820906	2.6656e-08
ENSG00000078124.7	ACER3	-0.257585	0.000837469
ENSG00000087085.9	ACHE	1.33289	2.13873e-19
ENSG00000144648.10	ACKR2	0.81425	3.05092e-06
ENSG00000129048.6	ACKR4	-0.800172	5.46456e-07
ENSG00000131473.12	ACLY	-0.327221	5.88558e-27
ENSG00000196636.7	ACN9	-0.405778	1.33677e-08
ENSG00000122729.14	ACO1	0.240461	0.00366694
ENSG00000172497.4	ACOT12	2.08325	0.00845121
ENSG00000097021.15	ACOT7	0.648646	2.02119e-13
ENSG00000087008.11	ACOX3	-0.462563	1.74668e-11
ENSG00000143727.11	ACP1	-0.151166	0.00330615
ENSG00000134575.5	ACP2	0.558663	3.13027e-08
ENSG00000102575.6	ACP5	1.09472	0.00398443
ENSG00000111644.3	ACRBP	1.23623	1.3178e-14
ENSG00000147174.7	ACRC	0.756383	4.78258e-10
ENSG00000130377.9	ACSBG2	0.824397	0.0305063
ENSG00000167107.8	ACSF2	0.651795	8.41028e-25
ENSG00000176715.11	ACSF3	0.317691	2.65262e-31
ENSG00000151726.9	ACSL1	-0.231445	1.37085e-05
ENSG00000123983.9	ACSL3	-0.529194	2.14906e-18
ENSG00000068366.15	ACSL4	-0.279041	6.12376e-05
ENSG00000197142.6	ACSL5	-0.8402	1.79209e-48
ENSG00000005187.7	ACSM3	1.42108	1.01625e-14
ENSG00000131069.15	ACSS2	1.34078	3.00144e-43
ENSG00000075624.9	ACTB	0.50739	3.12578e-25
ENSG00000184009.5	ACTG1	0.407291	5.09264e-30
ENSG00000182584.4	ACTL10	0.860041	5.75487e-32
ENSG00000136518.12	ACTL6A	0.34185	9.66953e-14
ENSG00000077080.5	ACTL6B	3.12857	0.0239261
ENSG00000130402.7	ACTN4	0.579197	8.28527e-30
ENSG00000131966.9	ACTR10	-0.573911	9.5833e-15
ENSG00000138107.7	ACTR1A	-0.104623	0.0182848
ENSG00000115073.6	ACTR1B	0.351172	5.17693e-24
ENSG00000138071.9	ACTR2	0.170683	0.0163128
ENSG00000115091.7	ACTR3	-0.211163	7.04145e-06
ENSG00000133627.13	ACTR3B	0.509012	6.87431e-15
ENSG00000184378.2	ACTRT3	0.672	0.00100066
ENSG00000135503.8	ACVR1B	-0.874348	2.37394e-13
ENSG00000121989.10	ACVR2A	-1.5781	5.27295e-10
ENSG00000114739.9	ACVR2B	-0.254845	0.00033983
ENSG00000132744.3	ACY3	0.365107	5.76124e-12
ENSG00000119640.4	ACYP1	0.346202	3.36191e-10
ENSG00000170634.8	ACYP2	0.407121	1.17277e-13
ENSG00000196839.8	ADA	-0.35065	3.56298e-22
ENSG00000168803.10	ADAL	-0.25231	0.00805769
ENSG00000137845.10	ADAM10	0.192671	1.39385e-05
ENSG00000073670.9	ADAM11	1.36413	3.01821e-21
ENSG00000148848.10	ADAM12	-1.76686	0.0241089
ENSG00000143537.9	ADAM15	0.466928	3.15473e-25
ENSG00000151694.8	ADAM17	-0.432447	4.18021e-32
ENSG00000135074.11	ADAM19	-0.213579	2.10097e-05
ENSG00000134007.3	ADAM20	0.921438	0.0179
ENSG00000008277.10	ADAM22	0.245706	1.81322e-05
ENSG00000114948.8	ADAM23	0.252278	0.00158301
ENSG00000042980.8	ADAM28	-2.1781	0.0118658
ENSG00000151651.11	ADAM8	0.424284	7.745e-05
ENSG00000168615.7	ADAM9	-0.418287	5.5792e-19
ENSG00000154734.10	ADAMTS1	-4.41157	0.000782468
ENSG00000160323.14	ADAMTS13	1.36636	2.06815e-95
ENSG00000156140.4	ADAMTS3	-5.57149	2.18241e-06
ENSG00000049192.10	ADAMTS6	0.183089	0.0129303
ENSG00000163638.9	ADAMTS9	-2.33491	0.0193058
ENSG00000143382.9	ADAMTSL4	1.19888	7.24849e-07
ENSG00000203804.3	ADAMTSL4-AS1	1.22367	2.10805e-08
ENSG00000185761.6	ADAMTSL5	1.14846	0.00017959
ENSG00000105963.9	ADAP1	0.866949	0.0317831
ENSG00000160710.11	ADAR	-0.235083	5.29737e-10
ENSG00000197381.11	ADARB1	1.23689	4.91819e-52
ENSG00000065457.6	ADAT1	0.336082	2.60488e-09
ENSG00000189007.11	ADAT2	0.227745	0.000445194
ENSG00000133597.5	ADCK2	-0.236881	0.000246745
ENSG00000163050.12	ADCK3	0.300194	1.8471e-11
ENSG00000173137.7	ADCK5	0.660395	3.55099e-33
ENSG00000138031.10	ADCY3	0.2296	2.24833e-05
ENSG00000129467.9	ADCY4	0.705507	0.000461662
ENSG00000121281.8	ADCY7	-0.435332	2.35623e-15
ENSG00000155897.5	ADCY8	-3.46886	0.0157564
ENSG00000162104.5	ADCY9	-0.458155	0.000685002
ENSG00000087274.12	ADD1	0.168373	8.57408e-06
ENSG00000148700.9	ADD3	0.183878	0.000628165
ENSG00000147576.11	ADHFE1	1.23559	0.000421044
ENSG00000182551.9	ADI1	0.219481	0.00465908
ENSG00000006831.9	ADIPOR2	-0.78056	1.0156e-55
ENSG00000156110.9	ADK	0.303293	2.53893e-07
ENSG00000148926.5	ADM	0.304695	0.0021984
ENSG00000128165.7	ADM2	0.466816	1.18941e-07
ENSG00000224420.3	ADM5	-0.415516	0.00820035
ENSG00000101126.11	ADNP	-0.858653	4.57309e-65
ENSG00000101544.4	ADNP2	0.166814	0.00403692
ENSG00000163485.11	ADORA1	-3.20594	0.0205167
ENSG00000128271.15	ADORA2A	0.703204	3.86949e-05
ENSG00000159322.13	ADPGK	-0.413604	4.12525e-15
ENSG00000144843.7	ADPRH	-3.10977	0.0320011
ENSG00000116863.10	ADPRHL2	-0.636269	1.3518e-21
ENSG00000170222.11	ADPRM	-0.342964	0.01842
ENSG00000169252.4	ADRB2	0.865482	6.86268e-13
ENSG00000173020.6	ADRBK1	0.16856	3.83601e-06
ENSG00000100077.10	ADRBK2	-0.420533	2.99894e-15
ENSG00000239900.7	ADSL	-1.0637	1.02599e-54
ENSG00000185100.6	ADSSL1	1.31662	4.06864e-21
ENSG00000259003.1	AE000662.92	0.845117	1.34722e-05
ENSG00000106624.4	AEBP1	0.657159	5.09989e-22
ENSG00000139154.10	AEBP2	0.640045	7.50453e-19
ENSG00000181026.13	AEN	-1.36618	9.58795e-172
ENSG00000104964.10	AES	0.478944	6.51017e-05
ENSG00000215346.3	AF131215.5	1.00604	2.74034e-16
ENSG00000169129.10	AFAP1L2	-0.369918	0.0271807
ENSG00000172493.16	AFF1	0.402483	2.3899e-13
ENSG00000144218.14	AFF3	0.319572	9.32988e-10
ENSG00000072364.8	AFF4	-0.530176	1.15528e-31
ENSG00000141385.5	AFG3L2	-0.343912	4.08226e-09
ENSG00000119844.10	AFTPH	-0.686438	9.01027e-36
ENSG00000038002.4	AGA	-0.48667	1.3551e-12
ENSG00000135439.7	AGAP2	-0.226122	6.07683e-05
ENSG00000133612.14	AGAP3	-0.476373	2.01082e-12
ENSG00000204149.5	AGAP6	0.304831	0.00208771
ENSG00000165923.11	AGBL2	0.567827	0.00166785
ENSG00000146856.10	AGBL3	0.478214	5.61274e-09
ENSG00000204305.9	AGER	1.27388	2.45847e-26
ENSG00000173744.13	AGFG1	-0.414051	1.72188e-14
ENSG00000106351.8	AGFG2	-0.139084	0.0407408
ENSG00000164252.8	AGGF1	-0.75832	2.14978e-41
ENSG00000006530.11	AGK	-0.784906	2.29995e-09
ENSG00000162688.11	AGL	-0.359789	2.87231e-09
ENSG00000116771.5	AGMAT	1.88398	1.24763e-16
ENSG00000123908.7	AGO2	0.422574	2.39297e-16
ENSG00000126070.14	AGO3	0.446336	1.78728e-22
ENSG00000134698.10	AGO4	-0.535979	1.75796e-19
ENSG00000204310.6	AGPAT1	0.55473	1.78246e-10
ENSG00000169692.8	AGPAT2	-0.235132	5.12229e-05
ENSG00000155189.7	AGPAT5	-0.417722	2.49152e-16
ENSG00000158669.7	AGPAT6	-0.143882	0.00060424
ENSG00000018510.8	AGPS	-1.37032	1.00785e-139
ENSG00000106541.7	AGR2	3.78753	1.15525e-08
ENSG00000188157.9	AGRN	1.11597	1.08998e-39
ENSG00000135744.7	AGT	-4.72011	4.25507e-05
ENSG00000135049.11	AGTPBP1	-0.809093	2.3782e-30
ENSG00000177674.11	AGTRAP	-0.833431	3.84916e-15
ENSG00000153207.10	AHCTF1	-0.66306	3.14278e-61
ENSG00000101444.8	AHCY	0.175339	7.7776e-06
ENSG00000158467.12	AHCYL2	0.311629	1.78042e-05
ENSG00000126705.9	AHDC1	0.551509	1.04694e-09
ENSG00000135541.16	AHI1	0.192388	0.0183356
ENSG00000185567.6	AHNAK2	2.2439	2.95393e-06
ENSG00000100591.3	AHSA1	-0.209454	9.08855e-05
ENSG00000173209.18	AHSA2	0.843732	1.22646e-81
ENSG00000111732.6	AICDA	-1.3657	3.54212e-145
ENSG00000186063.8	AIDA	0.234728	0.000738293
ENSG00000204472.8	AIF1	0.818951	0.00102055
ENSG00000126878.8	AIF1L	0.770533	0.0136652
ENSG00000156709.9	AIFM1	-0.167211	0.00703134
ENSG00000183773.11	AIFM3	1.21933	0.000680387
ENSG00000163568.9	AIM2	1.18465	0.00121406
ENSG00000106305.5	AIMP2	-1.2631	1.21106e-71
ENSG00000110711.5	AIP	0.197187	8.35119e-06
ENSG00000160224.12	AIRE	1.24864	0.000110525
ENSG00000106992.13	AK1	1.05934	0.000371987
ENSG00000004455.12	AK2	-0.296629	1.15191e-13
ENSG00000147853.12	AK3	0.32673	5.84725e-09
ENSG00000165695.5	AK8	1.31175	0.043024
ENSG00000155085.11	AK9	-0.725522	4.78925e-08
ENSG00000121057.8	AKAP1	-0.287636	1.73177e-06
ENSG00000023516.7	AKAP11	-0.348896	5.99788e-10
ENSG00000131016.12	AKAP12	0.914536	0.0334363
ENSG00000170776.15	AKAP13	-0.569955	1.43675e-57
ENSG00000197976.6	AKAP17A	0.325703	1.00864e-10
ENSG00000179841.8	AKAP5	0.544547	0.0025495
ENSG00000105127.4	AKAP8	-0.406685	3.40524e-17
ENSG00000166452.7	AKIP1	-0.47257	2.90008e-06
ENSG00000174574.11	AKIRIN1	-0.496504	1.42089e-16
ENSG00000135334.8	AKIRIN2	0.357832	2.59993e-08
ENSG00000106948.12	AKNA	-0.174613	2.01324e-06
ENSG00000117448.9	AKR1A1	-0.124267	0.010067
ENSG00000198074.5	AKR1B10	7.69945	1.14883e-18
ENSG00000187134.8	AKR1C1	7.13415	6.63006e-11
ENSG00000151632.12	AKR1C2	6.69927	3.41885e-27
ENSG00000196139.7	AKR1C3	6.59873	6.98527e-14
ENSG00000122787.10	AKR1D1	1.42647	0.000266951
ENSG00000053371.8	AKR7A2	0.459479	2.40401e-14
ENSG00000142208.11	AKT1	0.571141	1.44818e-21
ENSG00000204673.6	AKT1S1	0.520255	1.001e-15
ENSG00000105221.12	AKT2	0.630655	3.11662e-67
ENSG00000166971.12	AKTIP	-0.151522	0.00917011
ENSG00000223474.2	AL020996.1	1.58847	5.3561e-09
ENSG00000224997.1	AL049840.1	1.03857	4.04374e-14
ENSG00000269407.1	AL096677.1	1.80751	1.99196e-10
ENSG00000267848.1	AL118506.1	0.888853	0.0118237
ENSG00000203630.3	AL136531.1	-0.977141	0.00399339
ENSG00000253459.3	AL139099.1	1.41947	2.16977e-15
ENSG00000214479.1	AL139333.1	1.80389	0.0146756
ENSG00000268457.1	AL160175.1	1.80676	6.30693e-12
ENSG00000268578.1	AL354718.1	0.548724	0.00172914
ENSG00000224474.2	AL355490.1	1.18482	1.53071e-05
ENSG00000269620.1	AL590560.1	4.19054	0.00214641
ENSG00000232850.1	AL590708.2	0.709985	0.00138917
ENSG00000269337.1	AL591479.1	0.329226	0.0159076
ENSG00000215014.3	AL645728.1	1.04233	5.01856e-13
ENSG00000268996.1	AL807752.1	0.674624	4.05282e-05
ENSG00000148218.11	ALAD	0.36539	7.07645e-07
ENSG00000158578.14	ALAS2	1.2695	0.0228267
ENSG00000161618.5	ALDH16A1	0.209586	0.0272393
ENSG00000059573.4	ALDH18A1	-0.409553	1.77853e-22
ENSG00000165092.8	ALDH1A1	7.63236	5.44361e-57
ENSG00000184254.12	ALDH1A3	-0.81554	0.00187045
ENSG00000108602.13	ALDH3A1	4.91276	3.92037e-26
ENSG00000072210.14	ALDH3A2	-0.915001	2.54799e-22
ENSG00000112294.8	ALDH5A1	0.156459	2.93078e-05
ENSG00000119711.8	ALDH6A1	0.458751	3.6241e-14
ENSG00000143149.8	ALDH9A1	-0.316787	4.65012e-08
ENSG00000149925.12	ALDOA	-0.118825	0.00521553
ENSG00000109107.9	ALDOC	0.950234	6.65438e-30
ENSG00000253710.1	ALG11	-0.247632	0.0273933
ENSG00000101901.6	ALG13	0.601743	3.09757e-24
ENSG00000172339.9	ALG14	-0.40317	0.0205296
ENSG00000119523.8	ALG2	-0.243366	1.31052e-05
ENSG00000214160.5	ALG3	-0.452047	2.82477e-13
ENSG00000120697.4	ALG5	-0.574432	9.59543e-10
ENSG00000088035.11	ALG6	-0.236291	0.00399466
ENSG00000159063.8	ALG8	-0.251539	0.000468372
ENSG00000086848.10	ALG9	-0.188894	0.041369
ENSG00000100601.5	ALKBH1	-0.698878	4.37541e-13
ENSG00000189046.6	ALKBH2	-1.13874	2.63187e-90
ENSG00000166199.8	ALKBH3	-2.59546	2.50904e-32
ENSG00000160993.3	ALKBH4	0.572095	4.93728e-13
ENSG00000239382.6	ALKBH6	0.779753	1.99423e-05
ENSG00000125652.3	ALKBH7	0.125435	0.034102
ENSG00000137760.10	ALKBH8	-1.0562	1.31729e-27
ENSG00000116127.13	ALMS1	0.127969	0.020812
ENSG00000108839.7	ALOX12	1.4312	2.55251e-10
ENSG00000179477.5	ALOX12B	1.24729	0.000206228
ENSG00000012779.6	ALOX5	0.802022	9.51863e-81
ENSG00000132965.5	ALOX5AP	-1.03942	9.48975e-39
ENSG00000003393.10	ALS2	-0.407719	3.60539e-05
ENSG00000052850.5	ALX4	2.23681	0.00472758
ENSG00000183684.6	ALYREF	0.577488	7.50256e-21
ENSG00000242110.3	AMACR	0.839635	1.74595e-12
ENSG00000110497.10	AMBRA1	-0.381531	2.13261e-12
ENSG00000123505.10	AMD1	-0.473813	2.83432e-27
ENSG00000162066.10	AMDHD2	0.614444	2.17571e-10
ENSG00000184675.5	AMER1	-0.239265	0.000679562
ENSG00000159461.10	AMFR	-0.392747	4.30364e-18
ENSG00000104899.4	AMH	1.40392	2.03809e-15
ENSG00000135409.6	AMHR2	4.02347	0.0229004
ENSG00000160593.13	AMICA1	-0.670276	2.34963e-23
ENSG00000181754.6	AMIGO1	2.5652	1.7863e-08
ENSG00000139211.5	AMIGO2	3.84452	1.20877e-05
ENSG00000101935.5	AMMECR1	-0.207409	2.19588e-06
ENSG00000144233.5	AMMECR1L	-0.90697	4.77085e-46
ENSG00000166126.6	AMN	1.15783	2.19842e-99
ENSG00000126016.9	AMOT	-2.38935	0.00487514
ENSG00000166025.13	AMOTL1	-1.94737	0.0108012
ENSG00000116337.11	AMPD2	-0.257372	8.88814e-05
ENSG00000133805.11	AMPD3	-0.515078	8.30814e-16
ENSG00000145020.10	AMT	0.710229	3.84165e-13
ENSG00000240038.2	AMY2B	0.675455	3.00185e-05
ENSG00000174945.9	AMZ1	0.594904	1.18079e-10
ENSG00000196704.7	AMZ2	-0.248307	1.03791e-06
ENSG00000153107.7	ANAPC1	-0.475827	8.06518e-18
ENSG00000141552.13	ANAPC11	0.299142	8.49671e-10
ENSG00000129055.8	ANAPC13	-0.30967	0.000600132
ENSG00000110200.4	ANAPC15	0.390269	2.87082e-06
ENSG00000166295.4	ANAPC16	-0.213984	0.000679453
ENSG00000176248.7	ANAPC2	0.751597	3.50349e-44
ENSG00000089053.8	ANAPC5	-0.126722	0.00941492
ENSG00000130812.6	ANGPTL6	0.851209	2.68555e-22
ENSG00000029534.15	ANK1	-0.279483	1.8359e-06
ENSG00000145362.12	ANK2	-0.727099	2.19976e-29
ENSG00000151150.16	ANK3	-2.46598	0.00468052
ENSG00000151687.10	ANKAR	0.383645	0.0185742
ENSG00000132623.11	ANKEF1	-1.55748	4.93435e-37
ENSG00000185722.12	ANKFY1	0.215035	2.42564e-05
ENSG00000001629.5	ANKIB1	0.160687	0.000385285
ENSG00000160117.10	ANKLE1	-0.457208	6.85404e-17
ENSG00000176915.10	ANKLE2	0.261446	1.47019e-09
ENSG00000144504.11	ANKMY1	0.189633	0.00129469
ENSG00000106524.4	ANKMY2	-0.693893	2.17107e-11
ENSG00000164331.5	ANKRA2	0.529901	4.66869e-10
ENSG00000088448.10	ANKRD10	0.40865	1.89436e-21
ENSG00000101745.11	ANKRD12	-0.338606	6.64961e-11
ENSG00000076513.12	ANKRD13A	-0.757346	2.49323e-51
ENSG00000198720.8	ANKRD13B	-0.409865	1.13586e-05
ENSG00000172932.10	ANKRD13D	0.408408	1.53741e-16
ENSG00000132466.13	ANKRD17	-0.258663	2.30026e-10
ENSG00000196774.3	ANKRD20A1	1.52099	0.00465985
ENSG00000183148.5	ANKRD20A2	1.96194	2.22095e-08
ENSG00000132498.7	ANKRD20A3	1.58224	0.00390899
ENSG00000172014.11	ANKRD20A4	1.34805	4.76443e-07
ENSG00000089847.8	ANKRD24	0.881115	6.652e-07
ENSG00000105186.10	ANKRD27	-0.635746	1.04287e-29
ENSG00000206560.6	ANKRD28	-0.650299	8.86688e-48
ENSG00000163046.11	ANKRD30BL	1.685	3.12497e-07
ENSG00000133302.8	ANKRD32	0.454877	1.88678e-08
ENSG00000164236.7	ANKRD33B	0.62792	1.40789e-11
ENSG00000181039.7	ANKRD34A	0.971317	1.53604e-19
ENSG00000135976.12	ANKRD36	0.6955	3.19417e-22
ENSG00000174501.10	ANKRD36C	0.743849	3.98057e-12
ENSG00000186352.4	ANKRD37	0.536751	1.32439e-13
ENSG00000154945.6	ANKRD40	-0.894017	2.0892e-48
ENSG00000137494.9	ANKRD42	-0.259363	0.0181165
ENSG00000065413.12	ANKRD44	-0.0908047	0.0344856
ENSG00000168876.4	ANKRD49	-0.398097	2.30414e-05
ENSG00000151458.7	ANKRD50	0.328807	2.78736e-05
ENSG00000144031.7	ANKRD53	0.871894	0.0305796
ENSG00000235098.4	ANKRD65	2.27525	0.0172766
ENSG00000156381.4	ANKRD9	-2.58235	0.00104263
ENSG00000064999.12	ANKS1A	-0.424066	3.44003e-12
ENSG00000185046.14	ANKS1B	0.594398	1.66882e-08
ENSG00000165138.12	ANKS6	-0.229501	0.00471077
ENSG00000163516.9	ANKZF1	0.281934	3.20376e-10
ENSG00000074855.6	ANO8	0.568155	5.92736e-17
ENSG00000185101.8	ANO9	0.619456	8.82389e-28
ENSG00000140350.11	ANP32A	0.212114	5.93903e-07
ENSG00000136938.8	ANP32B	0.795299	1.00842e-39
ENSG00000143401.10	ANP32E	0.275553	5.71648e-08
ENSG00000163297.12	ANTXR2	-2.81047	0.0499923
ENSG00000198250.8	ANTXRL	1.7755	0.0120316
ENSG00000135046.9	ANXA1	1.8732	3.91885e-12
ENSG00000122359.13	ANXA11	0.255052	3.81006e-08
ENSG00000182718.12	ANXA2	-1.34851	2.10577e-42
ENSG00000177721.3	ANXA2R	0.552573	1.07092e-11
ENSG00000138772.8	ANXA3	3.87117	0.0118979
ENSG00000196975.10	ANXA4	1.7168	6.96865e-09
ENSG00000197043.9	ANXA6	-0.663093	1.38587e-09
ENSG00000138279.11	ANXA7	-0.353899	2.0942e-07
ENSG00000131480.4	AOC2	0.688496	3.17426e-08
ENSG00000131471.2	AOC3	-0.502651	3.46792e-12
ENSG00000218537.1	AP000350.4	0.817853	5.21498e-12
ENSG00000173727.7	AP000769.1	0.870324	1.8064e-24
ENSG00000235878.4	AP001468.1	1.05704	0.00376922
ENSG00000268856.1	AP001579.1	1.08743	0.0037178
ENSG00000254531.1	AP001816.1	0.491421	0.000162644
ENSG00000254614.1	AP003068.23	0.809173	6.71813e-07
ENSG00000187066.4	AP003068.6	1.21524	5.66847e-07
ENSG00000269089.1	AP003733.1	1.98417	4.33853e-30
ENSG00000255284.1	AP006621.5	0.598802	1.26382e-19
ENSG00000138660.7	AP1AR	-0.202476	0.000141154
ENSG00000166747.8	AP1G1	-0.622583	1.55814e-26
ENSG00000213983.7	AP1G2	0.514473	6.43983e-22
ENSG00000072958.4	AP1M1	0.40549	2.83575e-07
ENSG00000129354.7	AP1M2	1.29355	0.00740961
ENSG00000106367.9	AP1S1	0.136416	0.0179577
ENSG00000182287.9	AP1S2	0.458004	7.05233e-14
ENSG00000152056.12	AP1S3	-1.97063	4.96782e-18
ENSG00000196961.8	AP2A1	0.253273	5.01231e-09
ENSG00000161203.9	AP2M1	-0.103008	0.0300108
ENSG00000042753.7	AP2S1	0.371558	5.42044e-14
ENSG00000132842.9	AP3B1	-0.134046	0.0263085
ENSG00000103723.8	AP3B2	0.738965	0.000158685
ENSG00000065000.11	AP3D1	-0.277227	1.5981e-11
ENSG00000185009.8	AP3M1	0.106928	0.0200238
ENSG00000177879.10	AP3S1	0.163724	0.00554899
ENSG00000081014.6	AP4E1	-0.837018	4.4306e-54
ENSG00000221838.5	AP4M1	0.759095	1.35131e-26
ENSG00000100478.10	AP4S1	0.292565	0.000223951
ENSG00000254470.2	AP5B1	0.394106	2.25412e-10
ENSG00000053770.7	AP5M1	-0.17852	0.0110866
ENSG00000120868.9	APAF1	0.352705	1.81917e-10
ENSG00000011132.7	APBA3	0.678749	2.1053e-28
ENSG00000077420.11	APBB1IP	-0.095791	0.042492
ENSG00000163697.12	APBB2	-0.230953	3.07777e-08
ENSG00000113108.13	APBB3	0.795893	0.042728
ENSG00000134982.12	APC	-1.1276	9.6243e-80
ENSG00000115266.7	APC2	0.616833	3.8876e-24
ENSG00000138613.9	APH1B	-0.477129	1.02579e-12
ENSG00000166181.8	API5	-0.212684	2.98356e-05
ENSG00000149089.8	APIP	-0.482391	3.08502e-07
ENSG00000169621.5	APLF	0.731499	4.06608e-20
ENSG00000105290.7	APLP1	1.03535	0.000560591
ENSG00000158874.7	APOA2	2.61878	0.00461402
ENSG00000124701.5	APOBEC2	0.687797	0.0257364
ENSG00000179750.11	APOBEC3B	0.380737	0.00546614
ENSG00000244509.3	APOBEC3C	0.954139	2.34247e-24
ENSG00000243811.3	APOBEC3D	0.406677	0.000182559
ENSG00000239713.3	APOBEC3G	0.24667	8.66709e-05
ENSG00000100298.11	APOBEC3H	3.23437	0.0400492
ENSG00000130203.5	APOE	1.22898	5.12792e-09
ENSG00000175336.8	APOF	0.638623	0.00182301
ENSG00000100342.16	APOL1	1.19833	5.99267e-13
ENSG00000221963.5	APOL6	-0.331706	1.50161e-17
ENSG00000178878.8	APOLD1	0.848631	5.91555e-51
ENSG00000204444.6	APOM	0.800779	4.88811e-08
ENSG00000184831.9	APOO	-0.460803	0.00797904
ENSG00000155008.9	APOOL	0.592857	2.40935e-05
ENSG00000256053.3	APOPT1	-0.417373	1.36622e-06
ENSG00000142192.16	APP	-0.996893	7.43002e-06
ENSG00000062725.5	APPBP2	-0.70147	4.41225e-28
ENSG00000157500.6	APPL1	-0.259911	2.92931e-05
ENSG00000137074.14	APTX	-0.183404	0.0202937
ENSG00000178301.3	AQP11	1.28803	0.00434638
ENSG00000171885.9	AQP4	-6.37841	1.11364e-08
ENSG00000021776.6	AQR	-0.442375	3.37474e-11
ENSG00000078061.8	ARAF	-0.709479	1.83686e-30
ENSG00000186635.10	ARAP1	0.319882	2.3026e-14
ENSG00000047365.7	ARAP2	-0.410241	2.64651e-12
ENSG00000120318.11	ARAP3	1.43067	0.0164705
ENSG00000198576.2	ARC	-3.7514	0.00196906
ENSG00000095139.9	ARCN1	-0.525257	2.41853e-21
ENSG00000143761.9	ARF1	0.285696	1.04867e-09
ENSG00000004059.6	ARF5	-0.152679	0.000939976
ENSG00000149182.10	ARFGAP2	0.178588	5.53344e-05
ENSG00000242247.6	ARFGAP3	0.202727	0.00268333
ENSG00000066777.4	ARFGEF1	-0.437218	5.80025e-22
ENSG00000164144.10	ARFIP1	-0.510586	7.20636e-12
ENSG00000132254.8	ARFIP2	-0.207148	0.00115464
ENSG00000134884.9	ARGLU1	0.700547	4.99325e-50
ENSG00000198826.6	ARHGAP11A	-0.201135	3.50096e-05
ENSG00000187951.6	ARHGAP11B	0.561853	1.10997e-22
ENSG00000165322.13	ARHGAP12	-0.282	0.000534864
ENSG00000075884.8	ARHGAP15	-0.233445	0.000103596
ENSG00000140750.12	ARHGAP17	2.26458	9.01733e-91
ENSG00000146376.6	ARHGAP18	-4.82445	8.02796e-49
ENSG00000107863.12	ARHGAP21	-1.0279	0.000634029
ENSG00000128805.10	ARHGAP22	1.27639	0.0046779
ENSG00000225485.3	ARHGAP23	-0.529714	0.00223739
ENSG00000138639.13	ARHGAP24	-0.33678	1.27139e-05
ENSG00000145819.11	ARHGAP26	0.830364	1.35525e-51
ENSG00000159314.7	ARHGAP27	1.12352	2.4236e-82
ENSG00000186517.9	ARHGAP30	-0.433068	2.7279e-37
ENSG00000031081.6	ARHGAP31	-1.78181	1.56211e-05
ENSG00000004777.14	ARHGAP33	1.25907	3.30981e-112
ENSG00000160007.13	ARHGAP35	-0.681638	1.76584e-113
ENSG00000089820.11	ARHGAP4	0.22483	3.6301e-06
ENSG00000100852.8	ARHGAP5	-0.408768	1.38808e-07
ENSG00000123329.13	ARHGAP9	0.126948	0.0231548
ENSG00000141522.7	ARHGDIA	0.578331	5.00437e-24
ENSG00000111348.4	ARHGDIB	0.130968	0.000771495
ENSG00000076928.13	ARHGEF1	0.26097	1.37043e-13
ENSG00000132694.14	ARHGEF11	1.83057	3.71251e-12
ENSG00000104880.13	ARHGEF18	-0.585209	1.53671e-28
ENSG00000142632.12	ARHGEF19	0.192224	0.0113571
ENSG00000116584.13	ARHGEF2	-0.250367	3.74487e-09
ENSG00000240771.2	ARHGEF25	1.46122	0.000196965
ENSG00000214944.5	ARHGEF28	3.07755	1.18593e-05
ENSG00000163947.7	ARHGEF3	-1.56746	1.54728e-30
ENSG00000183111.7	ARHGEF37	1.03541	0.00259112
ENSG00000137135.13	ARHGEF39	0.258217	0.000133257
ENSG00000129675.11	ARHGEF6	-0.45886	7.47489e-21
ENSG00000102606.13	ARHGEF7	-0.17685	0.00045209
ENSG00000131089.9	ARHGEF9	0.991145	3.77074e-97
ENSG00000117713.13	ARID1A	0.316416	1.04361e-06
ENSG00000049618.17	ARID1B	0.313683	7.0464e-06
ENSG00000189079.11	ARID2	-0.361344	1.74342e-13
ENSG00000116017.6	ARID3A	0.317401	2.91883e-12
ENSG00000205143.2	ARID3C	0.964973	0.000221935
ENSG00000032219.14	ARID4A	-0.24241	0.000516617
ENSG00000054267.16	ARID4B	-0.283095	5.29708e-08
ENSG00000196843.11	ARID5A	0.326037	3.18297e-08
ENSG00000150347.10	ARID5B	-0.834221	7.21114e-43
ENSG00000166233.8	ARIH1	-0.400553	2.88835e-12
ENSG00000177479.15	ARIH2	-0.411734	2.44794e-16
ENSG00000221883.2	ARIH2OS	1.13515	6.47302e-32
ENSG00000120805.9	ARL1	-0.390384	4.24358e-08
ENSG00000152219.4	ARL14EP	-0.983783	1.2906e-64
ENSG00000185305.6	ARL15	-0.480674	3.43844e-12
ENSG00000228696.4	ARL17B	1.23483	0.00836778
ENSG00000213465.3	ARL2	-0.298751	0.00357986
ENSG00000175906.4	ARL4D	2.71629	1.34654e-31
ENSG00000165997.4	ARL5B	-0.160399	0.0130672
ENSG00000113966.5	ARL6	-0.491978	0.000405627
ENSG00000170540.10	ARL6IP1	0.220888	0.000517366
ENSG00000182196.9	ARL6IP4	0.968596	1.80848e-07
ENSG00000144746.6	ARL6IP5	-0.856012	1.69047e-19
ENSG00000177917.6	ARL6IP6	0.675025	4.73296e-95
ENSG00000134108.8	ARL8B	-0.299635	3.72854e-06
ENSG00000196503.2	ARL9	-1.29481	0.000214319
ENSG00000104442.5	ARMC1	-0.264597	0.000162512
ENSG00000170632.9	ARMC10	-0.183945	0.0308034
ENSG00000157343.4	ARMC12	0.754551	0.000628755
ENSG00000140691.12	ARMC5	-0.361169	0.00759361
ENSG00000105676.9	ARMC6	-0.639427	1.41813e-40
ENSG00000114098.13	ARMC8	-0.284218	2.23614e-05
ENSG00000135931.13	ARMC9	-0.708277	9.23613e-08
ENSG00000196440.7	ARMCX4	-3.72086	0.00739615
ENSG00000198960.6	ARMCX6	0.296124	0.00471014
ENSG00000172379.14	ARNT2	-2.32985	0.00769438
ENSG00000241685.4	ARPC1A	-0.251329	9.50073e-09
ENSG00000111229.11	ARPC3	-0.135317	0.0395698
ENSG00000241553.8	ARPC4	-0.443067	1.92627e-16
ENSG00000162704.11	ARPC5	0.244762	3.73028e-09
ENSG00000136950.9	ARPC5L	-0.41175	4.22629e-20
ENSG00000120500.13	ARR3	1.64901	1.41864e-09
ENSG00000197070.9	ARRDC1	0.193061	0.000107018
ENSG00000105643.5	ARRDC2	0.114116	0.0467755
ENSG00000113369.4	ARRDC3	0.698078	1.50007e-17
ENSG00000100299.13	ARSA	0.370125	2.60097e-07
ENSG00000157399.10	ARSE	3.30553	0.0361749
ENSG00000141337.8	ARSG	0.319089	6.95409e-06
ENSG00000117407.12	ARTN	1.14753	0.00268936
ENSG00000173409.9	ARV1	-0.550892	1.93756e-08
ENSG00000099889.9	ARVCF	0.812873	3.56343e-23
ENSG00000104763.13	ASAH1	-0.202524	0.00101667
ENSG00000204147.5	ASAH2B	-3.69732	0.00614956
ENSG00000088280.14	ASAP3	-0.332831	0.00872346
ENSG00000065802.7	ASB1	0.201234	5.22109e-05
ENSG00000196372.8	ASB13	-1.08122	4.35402e-70
ENSG00000161664.2	ASB16	1.28572	1.33022e-07
ENSG00000100628.7	ASB2	-0.596749	1.8387e-13
ENSG00000148331.7	ASB6	-0.223724	0.00253598
ENSG00000183475.8	ASB7	-1.31712	2.82207e-67
ENSG00000177981.6	ASB8	-0.594346	3.01736e-15
ENSG00000138303.13	ASCC1	-0.412658	2.65816e-12
ENSG00000100325.10	ASCC2	-0.127067	0.0276744
ENSG00000112249.9	ASCC3	-0.443079	3.88731e-14
ENSG00000139352.3	ASCL1	-4.97982	3.99275e-05
ENSG00000111875.7	ASF1A	-0.295982	3.13265e-06
ENSG00000105011.4	ASF1B	0.800066	6.51765e-128
ENSG00000129691.11	ASH2L	0.192147	0.000465072
ENSG00000213199.3	ASIC3	1.59955	4.45723e-61
ENSG00000072182.8	ASIC4	1.93222	9.76651e-09
ENSG00000126522.12	ASL	0.913648	3.81838e-57
ENSG00000169093.10	ASMTL	0.329062	2.7708e-08
ENSG00000070669.12	ASNS	-0.539096	1.07895e-58
ENSG00000138381.5	ASNSD1	-0.654721	1.12606e-21
ENSG00000204653.5	ASPDH	1.29297	1.23365e-09
ENSG00000198363.11	ASPH	0.246772	2.85765e-05
ENSG00000128203.6	ASPHD2	-0.824373	5.01861e-38
ENSG00000066279.12	ASPM	-0.226797	2.60266e-08
ENSG00000169696.11	ASPSCR1	0.390028	1.79589e-14
ENSG00000130707.13	ASS1	0.653441	1.84268e-28
ENSG00000034533.7	ASTE1	-0.358752	0.00310286
ENSG00000188886.3	ASTL	1.82541	3.75546e-06
ENSG00000152092.11	ASTN1	-4.18409	0.00166347
ENSG00000148219.12	ASTN2	-6.35592	5.55467e-09
ENSG00000064102.10	ASUN	-1.08193	3.50685e-41
ENSG00000171456.12	ASXL1	-0.151251	0.00026218
ENSG00000143970.12	ASXL2	0.280542	3.84008e-10
ENSG00000154438.3	ASZ1	0.358799	5.10379e-05
ENSG00000156802.8	ATAD2	0.339828	1.07795e-11
ENSG00000119778.10	ATAD2B	-0.409675	1.4815e-13
ENSG00000197785.9	ATAD3A	-0.21015	5.64329e-05
ENSG00000176208.4	ATAD5	0.690598	1.58459e-35
ENSG00000137343.13	ATAT1	0.740576	3.52215e-12
ENSG00000167654.13	ATCAY	-3.72028	0.0106724
ENSG00000107669.13	ATE1	-0.258611	0.000105055
ENSG00000123268.4	ATF1	-0.361932	4.38497e-07
ENSG00000115966.12	ATF2	-0.243859	0.00159218
ENSG00000128272.10	ATF4	-0.101332	0.00144661
ENSG00000169136.4	ATF5	0.221731	0.0051198
ENSG00000118217.5	ATF6	-0.281059	1.78166e-05
ENSG00000213676.6	ATF6B	0.385288	1.06395e-13
ENSG00000166669.9	ATF7IP2	-0.341504	0.00416344
ENSG00000152348.11	ATG10	0.644416	7.25593e-12
ENSG00000145782.8	ATG12	-0.225609	0.00862475
ENSG00000175224.12	ATG13	-0.468381	6.60371e-17
ENSG00000126775.8	ATG14	0.358465	0.0003715
ENSG00000085978.17	ATG16L1	-0.247185	0.000360247
ENSG00000168010.6	ATG16L2	1.03967	1.18403e-107
ENSG00000110046.8	ATG2A	0.579993	9.26513e-30
ENSG00000066739.7	ATG2B	-0.325916	6.76095e-11
ENSG00000144848.6	ATG3	-0.593713	4.45395e-20
ENSG00000101844.13	ATG4A	-0.307048	0.0229482
ENSG00000168397.12	ATG4B	0.189562	1.0817e-05
ENSG00000130734.5	ATG4D	0.139528	0.00465168
ENSG00000057663.8	ATG5	-0.645642	1.2085e-19
ENSG00000197548.8	ATG7	0.304021	0.00103881
ENSG00000198925.6	ATG9A	0.391919	2.7024e-22
ENSG00000142102.11	ATHL1	1.54678	1.88562e-138
ENSG00000198513.7	ATL1	-0.463322	0.0325498
ENSG00000119787.9	ATL2	-0.237382	1.46454e-06
ENSG00000184743.8	ATL3	-2.21114	3.01527e-130
ENSG00000149311.13	ATM	0.571457	3.38432e-24
ENSG00000166454.5	ATMIN	-0.772417	1.79232e-32
ENSG00000111676.10	ATN1	0.670141	4.00746e-10
ENSG00000179774.7	ATOH7	-1.0769	0.00129419
ENSG00000177556.7	ATOX1	0.25599	0.000291051
ENSG00000145246.9	ATP10D	-0.185097	0.0193012
ENSG00000058063.11	ATP11B	-0.281775	4.14962e-11
ENSG00000101974.10	ATP11C	0.150807	0.000778911
ENSG00000105726.12	ATP13A1	0.356825	2.13772e-09
ENSG00000159363.13	ATP13A2	0.188367	0.0289927
ENSG00000163399.11	ATP1A1	0.250134	6.53526e-06
ENSG00000143153.8	ATP1B1	2.09875	5.00417e-112
ENSG00000129244.4	ATP1B2	-1.72295	0.00446958
ENSG00000069849.6	ATP1B3	-0.105979	0.0327172
ENSG00000196296.9	ATP2A1	1.00388	5.13291e-18
ENSG00000174437.12	ATP2A2	0.27468	3.48473e-09
ENSG00000074370.13	ATP2A3	0.716065	9.59655e-43
ENSG00000070961.10	ATP2B1	-0.437094	1.22569e-25
ENSG00000157087.12	ATP2B2	2.53837	0.0315303
ENSG00000017260.15	ATP2C1	-0.295712	1.26634e-08
ENSG00000105675.4	ATP4A	2.25924	1.20599e-09
ENSG00000152234.11	ATP5A1	-0.412395	1.21052e-15
ENSG00000099624.3	ATP5D	0.607447	8.15836e-20
ENSG00000116459.6	ATP5F1	-0.702283	7.39873e-35
ENSG00000159199.9	ATP5G1	0.236994	2.97716e-05
ENSG00000135390.13	ATP5G2	-0.106932	0.0376474
ENSG00000169020.5	ATP5I	0.281303	9.36565e-06
ENSG00000167283.3	ATP5L	0.274429	2.1114e-05
ENSG00000241837.2	ATP5O	-0.448689	1.10174e-11
ENSG00000105341.14	ATP5SL	0.189295	0.00222362
ENSG00000071553.12	ATP6AP1	-0.142515	0.0174533
ENSG00000205464.7	ATP6AP1L	0.564017	0.00503886
ENSG00000182220.9	ATP6AP2	-0.667939	9.35958e-15
ENSG00000033627.10	ATP6V0A1	0.64063	4.22158e-13
ENSG00000185344.9	ATP6V0A2	-0.720212	7.40859e-50
ENSG00000185883.6	ATP6V0C	1.46336	4.13818e-11
ENSG00000113732.4	ATP6V0E1	-0.394396	4.50486e-11
ENSG00000171130.13	ATP6V0E2	-0.293736	3.50239e-07
ENSG00000114573.5	ATP6V1A	-0.506442	5.48763e-08
ENSG00000147416.6	ATP6V1B2	-0.139148	0.00992834
ENSG00000155097.7	ATP6V1C1	-0.225503	0.000872892
ENSG00000128524.4	ATP6V1F	0.14633	0.0172538
ENSG00000213760.6	ATP6V1G2	0.471316	0.0012362
ENSG00000151418.7	ATP6V1G3	1.13775	0.045991
ENSG00000123191.9	ATP7B	-0.502085	0.0442609
ENSG00000081923.6	ATP8B1	0.414977	0.0164865
ENSG00000143515.12	ATP8B2	-0.697248	7.60965e-09
ENSG00000130270.12	ATP8B3	1.32202	9.13263e-25
ENSG00000123472.8	ATPAF1	0.200719	0.0409653
ENSG00000130770.13	ATPIF1	0.15641	0.0371895
ENSG00000175054.10	ATR	-0.223799	0.0014422
ENSG00000138085.12	ATRAID	-0.36223	1.60107e-06
ENSG00000164053.13	ATRIP	0.899245	6.03768e-28
ENSG00000088812.13	ATRN	-2.32989	7.26561e-34
ENSG00000107518.12	ATRNL1	0.422658	7.49567e-14
ENSG00000085224.16	ATRX	-0.0955882	0.0420508
ENSG00000124788.13	ATXN1	-2.63959	0.000772555
ENSG00000130638.11	ATXN10	-0.0892062	0.0380952
ENSG00000224470.3	ATXN1L	-0.168212	0.00578324
ENSG00000204842.10	ATXN2	0.421925	5.32731e-08
ENSG00000168488.14	ATXN2L	0.491129	9.43224e-17
ENSG00000163635.13	ATXN7	0.415067	6.58904e-10
ENSG00000146776.10	ATXN7L1	-0.528604	1.41668e-07
ENSG00000087152.11	ATXN7L3	-0.257584	9.53045e-10
ENSG00000148090.7	AUH	0.556377	9.62834e-19
ENSG00000127423.6	AUNIP	-0.356197	0.000887906
ENSG00000115307.12	AUP1	-0.170719	2.9552e-05
ENSG00000087586.13	AURKA	-1.09944	1.10844e-79
ENSG00000175756.9	AURKAIP1	0.472696	1.17877e-25
ENSG00000178999.8	AURKB	0.308628	1.74061e-13
ENSG00000135407.6	AVIL	0.382192	0.000598165
ENSG00000105778.13	AVL9	-0.523555	1.47408e-31
ENSG00000103126.10	AXIN1	-0.357888	3.16944e-10
ENSG00000168646.8	AXIN2	0.607009	6.65498e-05
ENSG00000167601.7	AXL	2.24377	3.22417e-15
ENSG00000160862.8	AZGP1	2.96922	5.59362e-28
ENSG00000141577.9	AZI1	0.826923	1.03488e-36
ENSG00000155096.9	AZIN1	-0.163027	0.00394907
ENSG00000166710.13	B2M	0.212943	0.00103964
ENSG00000162885.8	B3GALNT2	0.155134	0.0268436
ENSG00000235863.2	B3GALT4	0.361863	3.57523e-05
ENSG00000176022.3	B3GALT6	-0.230061	0.0073791
ENSG00000187676.7	B3GALTL	-0.644066	2.58464e-05
ENSG00000112309.6	B3GAT2	-2.88491	0.0043248
ENSG00000149541.5	B3GAT3	-0.116391	0.0339237
ENSG00000174684.6	B3GNT1	-0.362055	3.39735e-05
ENSG00000170340.10	B3GNT2	-0.956397	3.33133e-21
ENSG00000176383.8	B3GNT4	1.14804	1.99399e-05
ENSG00000176597.7	B3GNT5	-1.20695	0.000338808
ENSG00000175711.4	B3GNTL1	0.58183	1.44056e-16
ENSG00000135454.9	B4GALNT1	0.794238	2.11472e-17
ENSG00000139044.6	B4GALNT3	-1.44502	0.00223787
ENSG00000182272.7	B4GALNT4	-2.18567	0.00169713
ENSG00000086062.8	B4GALT1	-0.4461	2.17509e-17
ENSG00000158850.10	B4GALT3	-1.00066	5.83171e-114
ENSG00000121578.8	B4GALT4	0.366088	7.56072e-05
ENSG00000158470.5	B4GALT5	-1.73873	6.47272e-39
ENSG00000118276.7	B4GALT6	-2.76427	2.94109e-19
ENSG00000123810.3	B9D2	0.440392	0.00551637
ENSG00000164929.12	BAALC	-3.9258	4.31649e-05
ENSG00000156273.11	BACH1	-0.734442	1.71455e-32
ENSG00000112182.10	BACH2	-0.356466	7.36556e-26
ENSG00000002330.9	BAD	-0.173668	0.0308034
ENSG00000107262.12	BAG1	-0.210722	0.000402261
ENSG00000151929.5	BAG3	0.64962	0.00221278
ENSG00000156735.6	BAG4	-0.56786	1.60562e-16
ENSG00000166170.9	BAG5	-0.582128	1.03005e-35
ENSG00000204463.8	BAG6	0.143904	0.00265358
ENSG00000140320.7	BAHD1	-0.527224	1.04707e-10
ENSG00000181790.6	BAI1	0.854037	1.12201e-09
ENSG00000175866.11	BAIAP2	1.2743	8.45612e-46
ENSG00000006453.9	BAIAP2L1	-0.470062	0.0092912
ENSG00000128298.12	BAIAP2L2	1.48908	1.3472e-06
ENSG00000007516.9	BAIAP3	1.67771	8.5821e-71
ENSG00000030110.8	BAK1	-0.821337	6.52553e-35
ENSG00000095739.7	BAMBI	1.15267	0.000234695
ENSG00000175334.3	BANF1	0.330469	3.95856e-07
ENSG00000172530.15	BANP	0.210422	2.35845e-06
ENSG00000163930.5	BAP1	0.118576	0.00821728
ENSG00000138376.6	BARD1	-0.127387	0.0205247
ENSG00000176788.7	BASP1	0.832106	1.30539e-30
ENSG00000156127.6	BATF	-4.05994	0.00187186
ENSG00000123685.4	BATF3	-0.819824	0.0349691
ENSG00000198604.6	BAZ1A	-0.718792	1.43655e-29
ENSG00000009954.6	BAZ1B	-0.664525	5.30107e-65
ENSG00000076108.7	BAZ2A	0.234965	9.09647e-05
ENSG00000123636.13	BAZ2B	-0.858458	2.35357e-51
ENSG00000105327.11	BBC3	0.351851	1.3579e-10
ENSG00000181004.5	BBS12	-1.49982	5.86494e-10
ENSG00000140463.9	BBS4	-0.213887	0.0023997
ENSG00000138686.5	BBS7	-0.184757	0.01955
ENSG00000122507.16	BBS9	0.287892	0.00213621
ENSG00000114439.14	BBX	-0.287035	2.72621e-08
ENSG00000132692.14	BCAN	-5.56875	3.48192e-10
ENSG00000075790.6	BCAP29	0.202188	0.00495791
ENSG00000185825.11	BCAP31	-0.352442	7.60646e-11
ENSG00000050820.12	BCAR1	-1.06426	1.62395e-16
ENSG00000137936.12	BCAR3	0.611504	6.63834e-12
ENSG00000116752.5	BCAS2	-0.287748	0.000208157
ENSG00000141376.16	BCAS3	0.362026	7.13741e-06
ENSG00000124243.13	BCAS4	-0.387373	1.06449e-23
ENSG00000060982.10	BCAT1	-0.771222	3.47147e-56
ENSG00000105552.10	BCAT2	0.429137	4.64788e-18
ENSG00000107949.12	BCCIP	-0.148171	0.00695291
ENSG00000186666.4	BCDIN3D	-0.405334	0.000124601
ENSG00000114200.5	BCHE	-2.80209	0.00899447
ENSG00000248098.6	BCKDHA	0.933412	2.69234e-06
ENSG00000083123.10	BCKDHB	0.169777	0.000775849
ENSG00000103507.9	BCKDK	0.446847	4.76363e-11
ENSG00000142867.8	BCL10	-0.392052	2.1233e-11
ENSG00000119866.16	BCL11A	-0.625523	2.05066e-32
ENSG00000171791.10	BCL2	-1.38813	0.0405937
ENSG00000140379.7	BCL2A1	-3.60565	0.00952116
ENSG00000171552.8	BCL2L1	-0.254938	1.01016e-09
ENSG00000137875.4	BCL2L10	2.64399	0.0025047
ENSG00000153094.17	BCL2L11	0.691604	1.5381e-33
ENSG00000126453.5	BCL2L12	0.898305	4.10142e-22
ENSG00000099968.13	BCL2L13	-0.131674	0.0206944
ENSG00000188761.7	BCL2L15	1.22596	0.041682
ENSG00000129473.5	BCL2L2	-0.291584	0.0160506
ENSG00000069399.8	BCL3	0.7218	2.1627e-10
ENSG00000113916.13	BCL6	-1.10047	6.11593e-106
ENSG00000110987.4	BCL7A	-0.477442	1.3462e-50
ENSG00000106635.3	BCL7B	-0.382332	1.00864e-10
ENSG00000099385.7	BCL7C	0.449781	1.54418e-05
ENSG00000116128.5	BCL9	-0.466641	2.16383e-05
ENSG00000029363.11	BCLAF1	-0.202717	0.000497573
ENSG00000183337.12	BCOR	-0.321342	2.41743e-07
ENSG00000085185.11	BCORL1	0.783055	3.21749e-09
ENSG00000186716.15	BCR	-0.739946	1.95346e-41
ENSG00000074582.8	BCS1L	-0.181802	0.00426476
ENSG00000161267.7	BDH1	0.404154	7.81107e-13
ENSG00000168398.5	BDKRB2	3.46183	0.0422875
ENSG00000145734.14	BDP1	-0.210387	0.000156241
ENSG00000126581.8	BECN1	-0.161966	0.00495312
ENSG00000178409.9	BEND3	-0.234621	0.00942481
ENSG00000188848.11	BEND4	-0.236684	4.21367e-08
ENSG00000151917.13	BEND6	-3.06111	5.0527e-32
ENSG00000167995.11	BEST1	1.867	7.85066e-129
ENSG00000127325.14	BEST3	-0.20777	7.6465e-06
ENSG00000142959.4	BEST4	1.05094	2.58297e-11
ENSG00000133169.5	BEX1	-3.60185	0.00935524
ENSG00000103429.6	BFAR	-0.436318	2.37872e-15
ENSG00000125864.7	BFSP1	-2.48506	0.00097662
ENSG00000170819.4	BFSP2	0.415289	0.0103429
ENSG00000242252.1	BGLAP	1.03699	0.0175779
ENSG00000182492.11	BGN	-3.71719	0.00994771
ENSG00000180535.3	BHLHA15	-0.373116	0.00893424
ENSG00000205899.3	BHLHA9	2.18273	0.0235974
ENSG00000198908.7	BHLHB9	-3.23998	2.43169e-12
ENSG00000125533.4	BHLHE23	1.27487	0.0391386
ENSG00000134107.4	BHLHE40	1.84071	0.0072835
ENSG00000151746.9	BICD1	0.324633	5.89428e-09
ENSG00000100290.2	BIK	-0.261789	0.000186639
ENSG00000110934.6	BIN2	-0.762262	9.01891e-21
ENSG00000110330.4	BIRC2	-0.402802	1.52995e-09
ENSG00000023445.9	BIRC3	-0.416343	2.13097e-12
ENSG00000115760.9	BIRC6	-0.427646	5.64902e-33
ENSG00000136573.8	BLK	0.702977	5.36233e-128
ENSG00000095585.12	BLNK	-0.390892	1.78087e-12
ENSG00000135441.3	BLOC1S1	0.380697	2.97707e-06
ENSG00000196072.7	BLOC1S2	-0.189097	0.0045675
ENSG00000104164.6	BLOC1S6	-0.412958	2.19714e-11
ENSG00000090013.5	BLVRB	0.206154	0.000172946
ENSG00000117475.9	BLZF1	-0.724797	1.21292e-16
ENSG00000104081.9	BMF	-0.679627	8.65774e-36
ENSG00000168283.9	BMI1	-0.269303	0.000190762
ENSG00000168487.13	BMP1	0.434997	0.0179685
ENSG00000152785.6	BMP3	-0.448289	3.75631e-23
ENSG00000153162.8	BMP6	1.22321	1.92202e-53
ENSG00000101144.8	BMP7	-0.578814	1.10119e-40
ENSG00000116985.6	BMP8B	0.589938	0.00214745
ENSG00000107779.7	BMPR1A	-1.30645	5.13583e-11
ENSG00000138696.6	BMPR1B	-2.24901	0.00287454
ENSG00000165733.7	BMS1	-0.809148	2.94257e-37
ENSG00000113734.13	BNIP1	-1.03778	2.44187e-14
ENSG00000140299.7	BNIP2	-0.810991	1.03438e-50
ENSG00000176171.7	BNIP3	0.21511	0.000526935
ENSG00000163141.14	BNIPL	1.41658	1.19136e-18
ENSG00000144857.10	BOC	-2.00231	0.0246662
ENSG00000145919.6	BOD1	-0.545531	2.53201e-17
ENSG00000038219.8	BOD1L1	-0.15488	0.000160562
ENSG00000178096.8	BOLA1	0.282258	0.0370612
ENSG00000136122.11	BORA	-0.63066	3.84435e-20
ENSG00000172331.7	BPGM	0.17769	0.00168447
ENSG00000137274.8	BPHL	0.312177	0.000713333
ENSG00000162813.13	BPNT1	-0.266959	1.96401e-05
ENSG00000171634.12	BPTF	0.0921347	0.0358516
ENSG00000157764.8	BRAF	-0.237028	1.76523e-11
ENSG00000089234.11	BRAP	-0.76896	7.51644e-24
ENSG00000012048.15	BRCA1	-0.251878	5.06185e-07
ENSG00000139618.10	BRCA2	-0.593587	2.66038e-14
ENSG00000204256.8	BRD2	-0.157075	2.64927e-05
ENSG00000169925.12	BRD3	0.770259	2.4546e-32
ENSG00000141867.13	BRD4	0.21621	2.12649e-05
ENSG00000166164.11	BRD7	-0.478333	1.70949e-24
ENSG00000028310.13	BRD9	0.253692	7.93028e-07
ENSG00000185024.11	BRF1	-0.236154	1.27139e-05
ENSG00000164713.5	BRI3	0.527824	0.000247903
ENSG00000184992.10	BRI3BP	0.117079	0.0393185
ENSG00000182685.3	BRICD5	0.68267	5.99906e-15
ENSG00000113460.8	BRIX1	-1.07782	6.56557e-19
ENSG00000254999.2	BRK1	-0.205914	0.00058858
ENSG00000156983.11	BRPF1	-0.601014	5.96112e-36
ENSG00000096070.15	BRPF3	0.219541	0.000400076
ENSG00000168000.10	BSCL2	0.430683	0.00155617
ENSG00000160058.14	BSDC1	0.522834	1.29755e-25
ENSG00000172270.14	BSG	0.50057	3.2718e-35
ENSG00000130303.8	BST2	-0.509714	1.18233e-16
ENSG00000095564.9	BTAF1	0.414662	5.72723e-18
ENSG00000064726.5	BTBD1	-0.164644	0.00200995
ENSG00000148925.6	BTBD10	-1.09337	5.43224e-36
ENSG00000151136.10	BTBD11	4.56499	0.0012673
ENSG00000233436.3	BTBD18	2.14144	9.86537e-24
ENSG00000222009.4	BTBD19	1.78717	1.56909e-23
ENSG00000133243.4	BTBD2	0.305172	2.18476e-10
ENSG00000184887.9	BTBD6	-0.584545	0.00139847
ENSG00000011114.10	BTBD7	-0.394046	1.06931e-08
ENSG00000189195.5	BTBD8	0.620867	4.56166e-07
ENSG00000134717.13	BTF3L4	-0.414539	2.72448e-11
ENSG00000133639.3	BTG1	0.186848	2.14396e-05
ENSG00000159388.5	BTG2	-0.235906	5.52547e-11
ENSG00000154640.10	BTG3	0.465444	5.07788e-12
ENSG00000010671.11	BTK	-0.291844	4.28087e-06
ENSG00000112763.11	BTN2A1	-0.384391	3.31597e-08
ENSG00000124508.12	BTN2A2	0.420148	4.81337e-15
ENSG00000186470.9	BTN3A2	0.216261	2.06763e-05
ENSG00000166167.13	BTRC	-0.646582	5.0746e-16
ENSG00000169679.10	BUB1	-0.115061	0.0252361
ENSG00000156970.8	BUB1B	0.10006	0.0368602
ENSG00000137656.7	BUD13	-0.388161	2.04731e-09
ENSG00000112578.5	BYSL	-1.26404	7.78768e-66
ENSG00000005379.11	BZRAP1	1.30005	1.14802e-55
ENSG00000082153.13	BZW1	-0.130359	0.0230547
ENSG00000136261.10	BZW2	-0.698118	4.11447e-27
ENSG00000165507.8	C10orf10	1.45987	0.00931863
ENSG00000165813.12	C10orf118	-0.493243	1.08897e-08
ENSG00000155640.5	C10orf12	-0.267796	1.41803e-05
ENSG00000173088.8	C10orf131	1.01971	0.0101886
ENSG00000107938.13	C10orf137	-0.174175	0.00192564
ENSG00000107815.3	C10orf2	-1.17345	3.69864e-51
ENSG00000166275.11	C10orf32	-0.34545	0.0366166
ENSG00000107738.15	C10orf54	-0.579399	1.91107e-06
ENSG00000119965.8	C10orf88	-0.212323	0.0190602
ENSG00000180066.5	C10orf91	0.705088	0.0359321
ENSG00000137720.3	C11orf1	-0.554453	2.59685e-05
ENSG00000171067.6	C11orf24	-0.309337	9.99162e-11
ENSG00000158636.12	C11orf30	0.310687	3.31132e-06
ENSG00000185522.4	C11orf35	0.750884	1.54577e-17
ENSG00000180878.2	C11orf42	0.86812	0.0203563
ENSG00000149179.9	C11orf49	0.226565	0.00432232
ENSG00000182919.10	C11orf54	-0.226298	0.00297811
ENSG00000150776.13	C11orf57	-0.55897	3.27636e-16
ENSG00000110696.5	C11orf58	0.38774	5.76463e-19
ENSG00000184224.3	C11orf72	1.67394	0.00121886
ENSG00000149196.11	C11orf73	-0.347253	4.04305e-05
ENSG00000173715.11	C11orf80	0.482193	6.43952e-18
ENSG00000165490.8	C11orf82	-0.593086	5.50302e-12
ENSG00000204922.4	C11orf83	0.365407	1.06766e-07
ENSG00000168005.4	C11orf84	0.326691	3.28543e-12
ENSG00000184682.5	C11orf89	-1.43843	0.0082792
ENSG00000139637.9	C12orf10	-0.444077	6.38634e-11
ENSG00000151135.5	C12orf23	-0.164902	0.00547166
ENSG00000133641.13	C12orf29	0.327129	2.2945e-05
ENSG00000047621.7	C12orf4	-0.743978	4.65076e-11
ENSG00000157895.7	C12orf43	-0.342314	0.000113085
ENSG00000123395.10	C12orf44	-0.804313	6.40504e-25
ENSG00000111412.4	C12orf49	-0.183997	0.00012506
ENSG00000078237.4	C12orf5	-0.441898	2.37649e-05
ENSG00000139405.11	C12orf52	-0.559886	5.9477e-16
ENSG00000111678.6	C12orf57	0.330344	2.74654e-08
ENSG00000182993.3	C12orf60	-0.523721	0.0295075
ENSG00000221949.2	C12orf61	1.25889	4.29997e-47
ENSG00000130921.3	C12orf65	0.480173	1.38231e-15
ENSG00000174206.8	C12orf66	-0.59931	1.14671e-10
ENSG00000204954.5	C12orf73	0.211142	0.0149199
ENSG00000235162.4	C12orf75	0.216377	0.000200748
ENSG00000174456.9	C12orf76	-0.514905	3.22788e-10
ENSG00000226397.3	C12orf77	0.248631	0.0128855
ENSG00000227051.4	C14orf132	-2.95836	0.0242397
ENSG00000170270.4	C14orf142	-0.250389	0.000412151
ENSG00000133943.16	C14orf159	0.477992	1.78448e-13
ENSG00000087302.4	C14orf166	-0.344823	2.35205e-07
ENSG00000168260.1	C14orf183	1.33271	0.0463529
ENSG00000156411.5	C14orf2	-0.462732	3.24344e-12
ENSG00000179476.3	C14orf28	0.613372	1.13355e-08
ENSG00000140104.9	C14orf79	0.683135	0.0005878
ENSG00000185347.13	C14orf80	0.499031	9.68834e-23
ENSG00000169758.8	C15orf27	-1.45352	0.000765781
ENSG00000259642.1	C15orf37	1.4637	6.75969e-20
ENSG00000167173.14	C15orf39	0.465799	6.55826e-08
ENSG00000169609.9	C15orf40	0.304466	4.03723e-07
ENSG00000186073.7	C15orf41	0.263083	0.0136276
ENSG00000128891.11	C15orf57	0.391909	1.29355e-05
ENSG00000261652.2	C15orf65	-1.46406	9.1588e-10
ENSG00000185716.7	C16orf52	-0.249089	0.026536
ENSG00000185905.3	C16orf54	-0.395415	0.0121976
ENSG00000140688.12	C16orf58	0.23032	3.83872e-05
ENSG00000162062.10	C16orf59	0.333478	5.45805e-11
ENSG00000103544.10	C16orf62	-0.351197	1.53207e-07
ENSG00000182831.7	C16orf72	-0.358112	5.74357e-09
ENSG00000154102.6	C16orf74	0.695195	2.18273e-25
ENSG00000196118.7	C16orf93	0.38494	4.45055e-08
ENSG00000260456.2	C16orf95	0.395336	0.00161592
ENSG00000154035.6	C17orf103	1.7599	3.69848e-19
ENSG00000180336.13	C17orf104	0.88226	7.43891e-07
ENSG00000205710.3	C17orf107	2.00718	0.00899996
ENSG00000258315.1	C17orf49	1.07811	7.68983e-06
ENSG00000212719.6	C17orf51	-0.382715	1.00614e-07
ENSG00000186665.8	C17orf58	-0.328177	0.00322918
ENSG00000196544.6	C17orf59	0.284395	4.69871e-05
ENSG00000178927.12	C17orf62	0.117625	0.00146852
ENSG00000214226.4	C17orf67	0.671378	8.43756e-12
ENSG00000185504.12	C17orf70	0.344875	1.89956e-09
ENSG00000224383.3	C17orf72	-0.956777	2.39567e-11
ENSG00000108666.5	C17orf75	-0.46289	2.0343e-10
ENSG00000141219.11	C17orf80	-0.569299	9.07934e-17
ENSG00000074356.12	C17orf85	0.148366	0.0437601
ENSG00000179294.5	C17orf96	0.467668	2.96526e-15
ENSG00000214556.4	C17orf98	2.74958	0.0159322
ENSG00000187997.7	C17orf99	1.22523	0.0158571
ENSG00000141428.12	C18orf21	-0.325137	0.000371987
ENSG00000152242.6	C18orf25	0.551212	2.96349e-32
ENSG00000177576.6	C18orf32	0.816707	1.01303e-08
ENSG00000176912.3	C18orf56	0.57186	3.19373e-08
ENSG00000141452.5	C18orf8	-0.374781	1.49429e-08
ENSG00000074842.3	C19orf10	-0.485877	4.14745e-31
ENSG00000131943.13	C19orf12	-0.584145	6.12895e-16
ENSG00000119559.11	C19orf25	0.408502	9.38718e-15
ENSG00000099625.8	C19orf26	1.32294	0.000790636
ENSG00000188305.4	C19orf35	2.58938	4.93944e-74
ENSG00000214212.4	C19orf38	0.40216	0.00175967
ENSG00000131944.5	C19orf40	-0.526739	0.000117834
ENSG00000105072.4	C19orf44	-0.492432	0.000510934
ENSG00000160392.9	C19orf47	0.371166	9.08611e-09
ENSG00000167747.9	C19orf48	-0.222676	9.57603e-13
ENSG00000142444.6	C19orf52	0.185869	0.00277618
ENSG00000188493.10	C19orf54	0.866087	5.54404e-21
ENSG00000167595.10	C19orf55	0.809384	3.2179e-23
ENSG00000132016.7	C19orf57	1.82311	1.785e-10
ENSG00000006015.13	C19orf60	0.132482	0.00940062
ENSG00000130813.13	C19orf66	0.315078	4.69534e-05
ENSG00000188032.5	C19orf67	1.71284	1.00809e-22
ENSG00000185453.8	C19orf68	0.537643	7.24036e-09
ENSG00000174917.4	C19orf70	0.238664	0.00122427
ENSG00000221916.2	C19orf73	0.920349	9.56769e-10
ENSG00000106392.6	C1GALT1	-0.280893	0.000129017
ENSG00000116922.10	C1orf109	-0.41579	1.00531e-10
ENSG00000000460.12	C1orf112	0.489527	1.51061e-12
ENSG00000143633.8	C1orf131	-0.369623	7.64518e-06
ENSG00000204377.3	C1orf134	-1.81184	7.90883e-12
ENSG00000175707.7	C1orf172	-3.92527	7.67807e-16
ENSG00000196533.6	C1orf186	-0.427202	0.0176608
ENSG00000179902.8	C1orf194	1.56671	0.00690576
ENSG00000119280.12	C1orf198	-1.19744	5.2003e-06
ENSG00000179840.5	C1orf200	1.8157	1.34935e-22
ENSG00000116667.8	C1orf21	-3.62662	0.00324678
ENSG00000249087.3	C1orf213	0.41011	2.47098e-06
ENSG00000142609.13	C1orf222	1.49791	0.0401547
ENSG00000198520.6	C1orf228	1.13324	9.47319e-19
ENSG00000228594.1	C1orf233	-2.96898	0.000905935
ENSG00000143793.8	C1orf35	0.31833	8.64657e-11
ENSG00000143612.14	C1orf43	-0.547024	1.24837e-35
ENSG00000164008.9	C1orf50	0.474561	1.36096e-08
ENSG00000159208.11	C1orf51	1.38271	0.00240282
ENSG00000162642.9	C1orf52	-0.28673	1.06106e-06
ENSG00000143443.9	C1orf56	0.578149	7.81782e-06
ENSG00000125462.12	C1orf61	-2.38282	8.86989e-17
ENSG00000117616.13	C1orf63	0.857561	8.39791e-66
ENSG00000162757.3	C1orf74	-0.244447	0.0248489
ENSG00000162585.12	C1orf86	0.573421	3.75526e-20
ENSG00000108561.4	C1QBP	-0.463362	9.57805e-16
ENSG00000165985.8	C1QL3	-1.20838	2.49706e-06
ENSG00000186897.3	C1QL4	2.5318	4.88813e-13
ENSG00000172247.3	C1QTNF4	2.37974	1.02952e-06
ENSG00000133466.9	C1QTNF6	0.620244	6.16787e-07
ENSG00000159403.11	C1R	1.48498	0.0478937
ENSG00000139178.6	C1RL	0.378224	0.0171581
ENSG00000182326.10	C1S	1.38448	9.26586e-05
ENSG00000166278.10	C2	0.978421	6.45905e-07
ENSG00000197183.8	C20orf112	0.466414	2.26901e-05
ENSG00000149609.5	C20orf144	0.995643	7.05703e-20
ENSG00000088854.11	C20orf194	1.08854	7.75895e-10
ENSG00000125531.5	C20orf195	1.16999	2.85561e-14
ENSG00000171984.10	C20orf196	-0.410459	8.45072e-08
ENSG00000171695.6	C20orf201	-0.996748	0.00143055
ENSG00000196476.7	C20orf96	1.19566	6.99153e-33
ENSG00000256073.2	C21orf119	0.472371	6.42882e-05
ENSG00000160226.11	C21orf2	0.483872	9.4008e-09
ENSG00000160221.12	C21orf33	-0.0951806	0.0226247
ENSG00000205930.4	C21orf49	0.400164	0.0187252
ENSG00000160298.13	C21orf58	0.765243	4.25266e-61
ENSG00000159079.14	C21orf59	-0.492852	1.21868e-09
ENSG00000169314.10	C22orf15	1.50799	3.357e-16
ENSG00000128254.9	C22orf24	1.16538	3.57635e-06
ENSG00000182257.5	C22orf26	0.887284	2.77923e-05
ENSG00000215012.4	C22orf29	0.630202	6.1123e-17
ENSG00000188511.8	C22orf34	0.652622	6.71787e-25
ENSG00000242259.4	C22orf39	-0.380283	1.22041e-09
ENSG00000157617.12	C2CD2	0.439893	5.42336e-10
ENSG00000168014.12	C2CD3	0.433377	1.0248e-15
ENSG00000111731.8	C2CD5	0.204605	0.00319148
ENSG00000273045.1	C2ORF15	-0.854289	9.03533e-08
ENSG00000221843.2	C2orf16	1.22823	5.84483e-12
ENSG00000197927.8	C2orf27A	-0.956905	9.98718e-05
ENSG00000115998.3	C2orf42	0.324079	1.19973e-05
ENSG00000118961.10	C2orf43	-0.240507	0.0106816
ENSG00000163026.7	C2orf44	-0.626534	5.04768e-16
ENSG00000163009.4	C2orf48	1.31851	1.7099e-57
ENSG00000186143.6	C2orf53	1.76243	0.00259093
ENSG00000158428.3	C2orf62	3.74696	1.31791e-06
ENSG00000168887.6	C2orf68	-0.111439	0.0202689
ENSG00000178074.5	C2orf69	-0.247389	0.00613429
ENSG00000159239.7	C2orf81	-0.478588	0.000249236
ENSG00000187699.6	C2orf88	-0.853249	7.3804e-38
ENSG00000163608.10	C3orf17	-0.593969	2.14023e-09
ENSG00000088543.10	C3orf18	-0.808184	0.000640536
ENSG00000131379.5	C3orf20	0.741449	7.93264e-26
ENSG00000198590.7	C3orf35	0.880453	0.00404865
ENSG00000181744.4	C3orf58	0.485303	6.80151e-29
ENSG00000188315.3	C3orf62	-0.361977	0.000611305
ENSG00000187068.2	C3orf70	-3.17004	0.0144247
ENSG00000138658.11	C4orf21	0.600293	5.73962e-16
ENSG00000197826.7	C4orf22	-0.373333	0.0420975
ENSG00000151470.8	C4orf33	-0.203828	0.0323225
ENSG00000163633.6	C4orf36	0.984967	4.52235e-27
ENSG00000205129.4	C4orf47	0.610721	0.0481383
ENSG00000106804.6	C5	-0.594448	6.70417e-12
ENSG00000113583.6	C5orf15	-0.342148	2.65573e-05
ENSG00000181904.8	C5orf24	0.206312	0.00325655
ENSG00000151881.10	C5orf28	-0.579272	1.86372e-16
ENSG00000221990.2	C5orf55	0.331162	0.024657
ENSG00000197536.6	C5orf56	0.307507	0.000800597
ENSG00000164241.9	C5orf63	-0.92978	5.47939e-08
ENSG00000186577.7	C6orf1	0.444265	3.98858e-12
ENSG00000196821.5	C6orf106	-0.879803	2.17644e-118
ENSG00000185127.5	C6orf120	0.132296	0.0262123
ENSG00000204564.7	C6orf136	0.599742	2.83843e-14
ENSG00000146476.6	C6orf211	-0.314826	0.000913768
ENSG00000221821.2	C6orf226	0.796642	3.7189e-11
ENSG00000204420.4	C6orf25	2.80907	3.46003e-14
ENSG00000204387.8	C6orf48	-0.22269	1.45877e-07
ENSG00000154079.5	C6orf57	-0.340953	0.000641745
ENSG00000112308.8	C6orf62	0.384057	2.82835e-28
ENSG00000198663.12	C6orf89	-0.152338	0.000698743
ENSG00000203711.7	C6orf99	0.933086	8.32047e-15
ENSG00000244291.1	C7orf13	1.36094	7.85532e-08
ENSG00000136197.8	C7orf25	0.910179	4.37621e-05
ENSG00000146576.8	C7orf26	-0.504213	8.50271e-13
ENSG00000153790.7	C7orf31	0.450992	0.00061474
ENSG00000180354.11	C7orf41	0.963388	1.08683e-12
ENSG00000146826.10	C7orf43	0.224121	5.74461e-05
ENSG00000122783.12	C7orf49	-0.169024	0.000274559
ENSG00000146540.10	C7orf50	-0.22062	1.57577e-13
ENSG00000146963.13	C7orf55-LUC7L2	0.291206	3.57586e-16
ENSG00000164746.9	C7orf57	1.7978	0.00246449
ENSG00000164603.7	C7orf60	-0.999495	1.67346e-41
ENSG00000176919.7	C8G	1.30278	5.77341e-08
ENSG00000184608.4	C8orf12	-0.912841	4.58404e-64
ENSG00000241852.5	C8orf58	-0.445055	0.003277
ENSG00000189376.7	C8orf76	0.416458	0.00606081
ENSG00000198917.7	C9orf114	0.248243	2.02087e-05
ENSG00000160401.10	C9orf117	0.804015	0.00322918
ENSG00000180539.4	C9orf139	1.42073	0.00197288
ENSG00000148362.6	C9orf142	0.192702	0.00244843
ENSG00000230185.4	C9orf147	1.07901	2.85458e-32
ENSG00000136932.9	C9orf156	-0.603476	0.000682394
ENSG00000171159.4	C9orf16	0.476201	1.32434e-20
ENSG00000196366.1	C9orf163	0.508603	7.92055e-06
ENSG00000197191.3	C9orf169	0.496528	0.00397394
ENSG00000232434.1	C9orf172	1.34026	1.72898e-10
ENSG00000197768.6	C9orf173	1.35094	8.244e-15
ENSG00000135045.6	C9orf40	0.29607	8.60025e-12
ENSG00000156017.8	C9orf41	-0.315219	1.04875e-08
ENSG00000157653.7	C9orf43	0.606435	0.000656585
ENSG00000238227.3	C9orf69	-0.848457	3.24047e-49
ENSG00000136819.10	C9orf78	0.224567	5.1452e-05
ENSG00000165181.12	C9orf84	1.53563	0.0254671
ENSG00000155621.10	C9orf85	-0.636725	6.59168e-11
ENSG00000165233.13	C9orf89	0.272016	0.00256573
ENSG00000157693.10	C9orf91	-0.384698	4.23806e-08
ENSG00000074410.9	CA12	4.4852	1.41232e-20
ENSG00000118298.6	CA14	1.97068	1.79843e-29
ENSG00000104267.5	CA2	-4.24971	0.000416792
ENSG00000178538.5	CA8	1.33065	3.06241e-38
ENSG00000102547.14	CAB39L	-0.382333	0.000697119
ENSG00000099991.12	CABIN1	0.27825	5.57177e-10
ENSG00000149679.7	CABLES2	0.98905	1.45627e-35
ENSG00000175544.9	CABP4	0.731231	0.00122651
ENSG00000160325.10	CACFD1	0.346518	1.76138e-05
ENSG00000141837.14	CACNA1A	0.977193	0.0165303
ENSG00000148408.8	CACNA1B	4.04225	0.00524338
ENSG00000153956.11	CACNA2D1	2.12272	0.012288
ENSG00000151062.10	CACNA2D4	0.529938	0.000870696
ENSG00000067191.11	CACNB1	0.409157	3.53319e-08
ENSG00000167535.3	CACNB3	0.843343	1.89085e-29
ENSG00000075461.5	CACNG4	-3.49264	0.00454103
ENSG00000142408.2	CACNG8	-2.15725	0.032021
ENSG00000105298.9	CACTIN	0.309414	5.28571e-08
ENSG00000151893.10	CACUL1	-0.277979	2.69109e-10
ENSG00000175161.9	CADM2	-3.49845	0.00725231
ENSG00000163618.13	CADPS	0.145002	0.00104263
ENSG00000164304.11	CAGE1	0.984166	1.12664e-05
ENSG00000012822.11	CALCOCO1	0.67875	1.0185e-15
ENSG00000136436.10	CALCOCO2	-0.314957	5.4673e-13
ENSG00000122786.15	CALD1	-1.99496	1.89624e-09
ENSG00000138172.6	CALHM2	-0.462198	0.011248
ENSG00000198668.6	CALM1	0.204409	2.21155e-08
ENSG00000143933.12	CALM2	0.207007	0.000270467
ENSG00000160014.12	CALM3	0.608491	3.99867e-30
ENSG00000169885.5	CALML6	0.634733	0.0142093
ENSG00000128595.12	CALU	-0.155079	0.00264846
ENSG00000130643.4	CALY	0.750079	0.0399051
ENSG00000134072.6	CAMK1	0.831489	0.0161434
ENSG00000145349.12	CAMK2D	0.176442	4.28737e-06
ENSG00000148660.16	CAMK2G	-0.198773	0.00221167
ENSG00000152495.6	CAMK4	-0.154875	0.000789797
ENSG00000110931.14	CAMKK2	-0.308837	6.38792e-08
ENSG00000164076.12	CAMKV	1.17179	1.05047e-05
ENSG00000164615.3	CAMLG	-0.184852	0.00114834
ENSG00000164047.3	CAMP	-1.09561	3.44391e-30
ENSG00000130559.14	CAMSAP1	-0.732924	3.24818e-86
ENSG00000118200.10	CAMSAP2	-0.474063	2.61265e-07
ENSG00000076826.5	CAMSAP3	-1.91336	3.62415e-22
ENSG00000108509.16	CAMTA2	0.709755	9.69469e-16
ENSG00000111530.8	CAND1	-0.399439	3.66777e-20
ENSG00000144712.7	CAND2	1.13426	7.40731e-14
ENSG00000171302.12	CANT1	-0.581867	2.10568e-15
ENSG00000127022.10	CANX	-0.630943	1.32906e-50
ENSG00000112186.7	CAP2	-2.87963	0.0452917
ENSG00000042493.11	CAPG	0.710053	0.0278866
ENSG00000142330.15	CAPN10	0.218344	3.7948e-08
ENSG00000103326.6	CAPN15	-0.460088	1.7597e-14
ENSG00000162909.13	CAPN2	0.884356	0.00342724
ENSG00000131375.5	CAPN7	0.12337	0.019041
ENSG00000126247.6	CAPNS1	0.197849	0.000454736
ENSG00000135387.15	CAPRIN1	-0.239478	3.74322e-13
ENSG00000110888.13	CAPRIN2	0.832766	3.92395e-53
ENSG00000105519.8	CAPS	0.365811	2.02367e-05
ENSG00000180881.15	CAPS2	0.934376	0.00190062
ENSG00000152611.7	CAPSL	2.83372	5.8527e-11
ENSG00000116489.8	CAPZA1	-0.143201	0.00551934
ENSG00000198898.8	CAPZA2	-0.553596	8.98362e-24
ENSG00000077549.13	CAPZB	0.189608	8.6948e-05
ENSG00000100065.10	CARD10	0.957824	0.00784793
ENSG00000198286.5	CARD11	-0.123578	0.000799921
ENSG00000141527.12	CARD14	1.67861	0.00167766
ENSG00000204397.3	CARD16	1.6148	0.047104
ENSG00000105483.12	CARD8	0.112712	0.0320014
ENSG00000187796.9	CARD9	0.671752	1.5895e-09
ENSG00000138380.13	CARF	0.544909	2.2706e-13
ENSG00000153048.6	CARHSP1	0.336148	1.77958e-18
ENSG00000213995.7	CARKD	-1.45442	1.26604e-34
ENSG00000142453.7	CARM1	-0.131599	0.0328822
ENSG00000172508.6	CARNS1	1.47107	6.95534e-46
ENSG00000110619.12	CARS	-0.547912	9.48229e-36
ENSG00000134905.12	CARS2	-0.273577	1.59064e-09
ENSG00000108349.10	CASC3	-0.290682	2.78336e-09
ENSG00000137812.15	CASC5	-0.244737	3.4669e-05
ENSG00000167971.14	CASKIN1	1.89347	6.60382e-08
ENSG00000137752.18	CASP1	4.13972	0.000552367
ENSG00000106144.15	CASP2	0.309804	6.26812e-09
ENSG00000165806.15	CASP7	-0.306478	2.29454e-05
ENSG00000064012.17	CASP8	-0.267656	0.00102189
ENSG00000087589.12	CASS4	1.53422	1.85369e-07
ENSG00000153113.19	CAST	-0.148612	0.00491196
ENSG00000166762.12	CATSPER2	0.431558	0.00718888
ENSG00000174898.11	CATSPERD	1.05756	0.000661542
ENSG00000099338.18	CATSPERG	1.33079	2.52115e-24
ENSG00000078699.17	CBFA2T2	0.323355	0.00148908
ENSG00000129993.10	CBFA2T3	0.504422	5.89018e-17
ENSG00000067955.9	CBFB	0.717724	3.34534e-14
ENSG00000105879.7	CBLL1	-0.200038	0.000837605
ENSG00000139899.6	CBLN3	0.285638	0.00954988
ENSG00000160200.13	CBS	0.104526	0.00243685
ENSG00000172785.14	CBWD1	-0.434402	3.52784e-07
ENSG00000136682.10	CBWD2	0.268293	0.000876058
ENSG00000196873.11	CBWD3	-0.342679	0.0483444
ENSG00000204790.8	CBWD6	-0.606747	0.000280934
ENSG00000108468.10	CBX1	0.39001	3.86978e-15
ENSG00000141582.10	CBX4	-0.504749	1.55716e-14
ENSG00000094916.9	CBX5	0.435023	1.06477e-13
ENSG00000100307.8	CBX7	1.14962	7.72592e-107
ENSG00000141570.6	CBX8	0.331997	1.57836e-06
ENSG00000132024.13	CC2D1A	0.226029	8.33264e-05
ENSG00000154222.10	CC2D1B	0.309885	2.68804e-11
ENSG00000158941.12	CCAR2	0.159913	0.00016312
ENSG00000176476.4	CCDC101	-0.293373	0.00076862
ENSG00000135736.5	CCDC102A	-0.236135	0.0414942
ENSG00000163001.7	CCDC104	-0.663865	6.44404e-08
ENSG00000173581.3	CCDC106	0.19653	0.00252865
ENSG00000005059.11	CCDC109B	-0.364978	1.29065e-07
ENSG00000172361.5	CCDC11	1.03344	5.77076e-09
ENSG00000168491.5	CCDC110	-1.21643	2.97196e-45
ENSG00000164221.8	CCDC112	-0.428779	0.000101251
ENSG00000103021.5	CCDC113	-0.701631	0.00143694
ENSG00000105479.11	CCDC114	1.11467	1.26249e-08
ENSG00000136710.5	CCDC115	0.300947	1.85779e-07
ENSG00000161180.6	CCDC116	1.9122	4.27309e-07
ENSG00000159873.5	CCDC117	-0.387004	5.77608e-13
ENSG00000160799.7	CCDC12	-0.355637	1.39378e-11
ENSG00000147144.8	CCDC120	1.01635	3.03172e-05
ENSG00000151773.8	CCDC122	-0.762216	1.7933e-14
ENSG00000183323.8	CCDC125	-0.684445	2.97465e-11
ENSG00000104957.9	CCDC130	0.318042	6.32927e-12
ENSG00000004766.11	CCDC132	-0.55773	6.17799e-09
ENSG00000100147.9	CCDC134	0.577071	6.4541e-19
ENSG00000128596.12	CCDC136	0.470184	1.80749e-14
ENSG00000163006.7	CCDC138	0.172906	0.00541944
ENSG00000175455.10	CCDC14	0.746449	1.14383e-35
ENSG00000163492.9	CCDC141	0.369762	1.64127e-07
ENSG00000135637.9	CCDC142	0.305814	1.38954e-06
ENSG00000170160.12	CCDC144A	2.23029	3.18691e-131
ENSG00000120051.10	CCDC147	0.551414	1.63205e-09
ENSG00000144395.13	CCDC150	0.549172	2.39111e-11
ENSG00000197599.8	CCDC154	1.47279	2.8039e-09
ENSG00000161609.5	CCDC155	1.11431	1.99871e-07
ENSG00000183401.7	CCDC159	0.699128	6.97245e-14
ENSG00000236624.4	CCDC163P	0.375029	0.000308832
ENSG00000255181.2	CCDC166	3.19312	0.0402335
ENSG00000159588.10	CCDC17	1.03457	2.51504e-30
ENSG00000164989.11	CCDC171	0.275286	3.61396e-05
ENSG00000154781.11	CCDC174	-0.223547	0.000445443
ENSG00000122483.13	CCDC18	0.307396	2.83627e-08
ENSG00000159214.8	CCDC24	-0.387703	0.042448
ENSG00000147419.12	CCDC25	-0.210541	0.0070179
ENSG00000024862.12	CCDC28A	0.368317	5.35546e-08
ENSG00000186409.10	CCDC30	0.407056	0.0352612
ENSG00000165972.8	CCDC38	0.851416	0.00155111
ENSG00000145075.7	CCDC39	0.466938	0.000244575
ENSG00000173588.10	CCDC41	-0.381939	8.74776e-07
ENSG00000186710.7	CCDC42B	0.111676	0.0369329
ENSG00000180329.9	CCDC43	-0.390783	8.25948e-07
ENSG00000108588.9	CCDC47	-0.310458	1.06652e-08
ENSG00000152492.9	CCDC50	-1.94348	0.0128387
ENSG00000164051.9	CCDC51	-0.777913	6.13111e-19
ENSG00000176155.14	CCDC57	0.289897	1.18566e-06
ENSG00000133773.7	CCDC59	-0.269773	0.000272776
ENSG00000108091.10	CCDC6	-0.357944	3.82177e-18
ENSG00000104983.4	CCDC61	0.357317	1.07416e-05
ENSG00000173093.8	CCDC63	3.14807	0.0374386
ENSG00000135127.7	CCDC64	-0.336433	1.51167e-06
ENSG00000162069.10	CCDC64B	1.1581	1.4209e-06
ENSG00000139537.6	CCDC65	0.614916	0.0497383
ENSG00000180376.12	CCDC66	-0.270955	0.0042918
ENSG00000166510.9	CCDC68	4.04293	0.0166536
ENSG00000198624.8	CCDC69	0.175958	6.81418e-11
ENSG00000177352.9	CCDC71	0.46793	7.10893e-09
ENSG00000163040.10	CCDC74A	1.30896	2.1772e-22
ENSG00000162004.12	CCDC78	0.371056	4.3307e-07
ENSG00000249961.5	CCDC79	3.67165	0.015323
ENSG00000175602.2	CCDC85B	0.279163	1.17801e-05
ENSG00000205476.4	CCDC85C	1.38282	0.0166921
ENSG00000110104.7	CCDC86	-0.532534	1.02342e-07
ENSG00000115355.11	CCDC88A	-0.360898	5.93978e-09
ENSG00000168071.17	CCDC88B	0.514649	1.11717e-17
ENSG00000015133.14	CCDC88C	-0.407514	7.37762e-38
ENSG00000105321.8	CCDC9	0.272812	0.000317518
ENSG00000137500.5	CCDC90B	-0.262587	0.000163852
ENSG00000119242.4	CCDC92	0.915382	1.36035e-07
ENSG00000105248.11	CCDC94	-0.206811	0.0174324
ENSG00000173013.4	CCDC96	1.3465	5.16601e-16
ENSG00000142039.3	CCDC97	0.502093	8.52472e-16
ENSG00000204536.9	CCHCR1	0.706425	9.38688e-37
ENSG00000161570.4	CCL5	2.08454	0.00374628
ENSG00000136280.11	CCM2	-1.12748	3.20994e-146
ENSG00000101331.11	CCM2L	1.00445	1.72473e-19
ENSG00000134057.10	CCNB1	-0.626311	4.69538e-23
ENSG00000100814.13	CCNB1IP1	-0.182071	0.00373274
ENSG00000112237.8	CCNC	-0.716458	8.77927e-20
ENSG00000118971.3	CCND2	-3.34122	1.30239e-05
ENSG00000112576.8	CCND3	-0.144033	0.00408827
ENSG00000105173.9	CCNE1	0.252563	0.000582933
ENSG00000175305.12	CCNE2	0.974255	5.5052e-76
ENSG00000162063.8	CCNF	-0.272648	2.98305e-07
ENSG00000113328.14	CCNG1	-0.51165	4.33344e-12
ENSG00000138764.9	CCNG2	0.469725	1.43665e-27
ENSG00000118816.5	CCNI	0.13389	0.000635452
ENSG00000205089.3	CCNI2	-1.13568	2.01945e-07
ENSG00000107443.11	CCNJ	-0.69147	2.20887e-19
ENSG00000090061.13	CCNK	0.450526	7.40047e-11
ENSG00000163660.7	CCNL1	0.58035	6.0677e-46
ENSG00000221978.7	CCNL2	0.854208	1.85163e-120
ENSG00000129315.5	CCNT1	-0.815411	9.47548e-37
ENSG00000082258.8	CCNT2	0.26615	2.19866e-05
ENSG00000108100.13	CCNY	-0.153178	0.00125146
ENSG00000163249.5	CCNYL1	0.624543	1.41762e-22
ENSG00000184451.5	CCR10	0.842446	2.31922e-18
ENSG00000151014.4	CCRN4L	0.431277	0.000106457
ENSG00000173992.4	CCS	0.718075	1.30842e-37
ENSG00000154429.6	CCSAP	0.307062	1.54938e-06
ENSG00000107771.11	CCSER2	-0.466905	1.67322e-12
ENSG00000166226.8	CCT2	-0.781832	1.32001e-48
ENSG00000163468.10	CCT3	-0.491859	5.40265e-25
ENSG00000115484.10	CCT4	-0.131409	0.0144417
ENSG00000150753.7	CCT5	-0.718427	8.16655e-32
ENSG00000146731.6	CCT6A	-0.139574	0.0124543
ENSG00000132141.9	CCT6B	0.681727	9.87925e-08
ENSG00000135624.11	CCT7	-0.306021	1.62431e-12
ENSG00000156261.8	CCT8	-0.303561	6.3487e-09
ENSG00000122674.8	CCZ1	-0.370975	0.00194681
ENSG00000146574.11	CCZ1B	-0.369239	0.000880585
ENSG00000156535.9	CD109	1.56533	0.0125387
ENSG00000177697.13	CD151	2.23587	9.48088e-99
ENSG00000134061.4	CD180	-0.541773	4.94211e-06
ENSG00000177455.7	CD19	0.40567	1.60736e-31
ENSG00000158473.6	CD1D	-1.03519	1.43172e-15
ENSG00000091972.14	CD200	-2.5347	0.000166818
ENSG00000012124.10	CD22	0.257359	4.4942e-18
ENSG00000174807.3	CD248	1.4997	1.41903e-07
ENSG00000139193.3	CD27	-0.639667	7.82881e-42
ENSG00000103855.13	CD276	-1.48183	0.0192464
ENSG00000178562.13	CD28	-2.7373	7.94186e-05
ENSG00000198087.7	CD2AP	0.0957966	0.0440494
ENSG00000169217.4	CD2BP2	-0.145737	0.000203214
ENSG00000167775.6	CD320	-0.437565	1.40574e-13
ENSG00000104894.7	CD37	0.617638	1.44664e-39
ENSG00000004468.8	CD38	0.332413	1.69587e-30
ENSG00000117877.6	CD3EAP	-0.887125	1.69484e-06
ENSG00000101017.9	CD40	0.347893	4.79211e-15
ENSG00000117335.14	CD46	0.288457	1.74366e-06
ENSG00000196776.10	CD47	0.212419	0.000178642
ENSG00000169442.4	CD52	-0.160201	0.0056345
ENSG00000143119.8	CD53	-0.383049	1.46371e-12
ENSG00000196352.9	CD55	0.195288	0.00225517
ENSG00000135404.7	CD63	-0.443022	5.29522e-12
ENSG00000110848.4	CD69	0.41181	0.000122096
ENSG00000137101.8	CD72	0.237119	0.000716481
ENSG00000019582.10	CD74	0.352649	9.66042e-05
ENSG00000007312.8	CD79B	-0.445267	6.82672e-58
ENSG00000110651.7	CD81	0.234423	2.35093e-08
ENSG00000085117.7	CD82	0.393839	1.73679e-06
ENSG00000066294.10	CD84	0.497268	0.000775849
ENSG00000153563.11	CD8A	3.47272	0.0128069
ENSG00000010278.7	CD9	-1.09465	0.0264951
ENSG00000002586.13	CD99	0.849482	0.00550391
ENSG00000102181.15	CD99L2	-0.172189	0.0418771
ENSG00000102543.10	CDADC1	0.62331	2.21873e-08
ENSG00000140326.8	CDAN1	0.561609	5.39439e-20
ENSG00000151465.9	CDC123	-0.643936	6.31665e-33
ENSG00000079335.13	CDC14A	-0.224404	0.0217861
ENSG00000130177.10	CDC16	0.154868	0.0208809
ENSG00000117399.9	CDC20	-0.3239	1.22772e-11
ENSG00000164287.8	CDC20B	3.01127	9.58964e-06
ENSG00000094880.6	CDC23	-0.421116	2.65372e-11
ENSG00000164045.7	CDC25A	-0.441711	1.41793e-22
ENSG00000101224.13	CDC25B	0.553138	4.8251e-26
ENSG00000158402.14	CDC25C	0.764707	1.96016e-32
ENSG00000176386.4	CDC26	-0.347681	0.0111251
ENSG00000004897.7	CDC27	-0.887815	5.81682e-49
ENSG00000099804.4	CDC34	-0.236347	0.0350907
ENSG00000105401.2	CDC37	0.397558	8.13871e-24
ENSG00000168438.10	CDC40	-0.446859	1.84976e-08
ENSG00000171219.8	CDC42BPG	0.375372	1.17322e-10
ENSG00000163171.6	CDC42EP3	-1.27198	0.00987627
ENSG00000167617.2	CDC42EP5	0.932815	0.0493352
ENSG00000197622.8	CDC42SE1	-0.467479	2.19172e-15
ENSG00000093009.5	CDC45	0.546269	1.25171e-30
ENSG00000096401.7	CDC5L	-0.419678	6.29394e-15
ENSG00000094804.5	CDC6	-0.120961	0.0118449
ENSG00000184661.9	CDCA2	-0.38001	2.29123e-10
ENSG00000111665.7	CDCA3	0.353896	1.50814e-14
ENSG00000170779.10	CDCA4	-0.125264	0.00758336
ENSG00000146670.5	CDCA5	0.480547	7.20885e-35
ENSG00000144354.9	CDCA7	0.178169	1.96175e-05
ENSG00000164649.15	CDCA7L	0.146351	0.00797341
ENSG00000134690.6	CDCA8	0.343052	1.93162e-08
ENSG00000039068.14	CDH1	4.559	0.00200215
ENSG00000140937.9	CDH11	-3.83866	0.00563318
ENSG00000140945.11	CDH13	-3.72902	0.00880241
ENSG00000079112.5	CDH17	4.18579	0.00585033
ENSG00000170558.4	CDH2	-5.48222	6.56777e-07
ENSG00000107736.15	CDH23	-0.685098	9.76536e-10
ENSG00000139880.15	CDH24	1.44105	2.45808e-22
ENSG00000124215.12	CDH26	0.774449	0.0388965
ENSG00000074276.6	CDHR2	0.880271	4.44227e-14
ENSG00000128536.11	CDHR3	0.706816	1.03297e-25
ENSG00000187492.4	CDHR4	2.04809	0.00254736
ENSG00000099834.14	CDHR5	1.69959	1.2701e-31
ENSG00000103502.9	CDIPT	0.20945	3.084e-05
ENSG00000170312.11	CDK1	0.300378	2.92755e-07
ENSG00000185324.17	CDK10	0.487227	1.65957e-23
ENSG00000008128.18	CDK11A	1.14774	7.19727e-20
ENSG00000248333.3	CDK11B	0.718413	7.25625e-31
ENSG00000167258.9	CDK12	0.108793	0.0124408
ENSG00000058091.12	CDK14	-0.306544	7.4163e-07
ENSG00000102225.11	CDK16	0.303911	3.28453e-11
ENSG00000059758.3	CDK17	-0.3565	2.14503e-16
ENSG00000117266.11	CDK18	1.84058	5.99339e-79
ENSG00000155111.10	CDK19	0.158957	0.000219689
ENSG00000123374.6	CDK2	0.386243	3.14679e-11
ENSG00000111328.2	CDK2AP1	0.623538	1.28148e-15
ENSG00000167797.3	CDK2AP2	0.94802	8.24078e-95
ENSG00000176749.4	CDK5R1	-1.04588	8.06463e-05
ENSG00000108465.10	CDK5RAP3	0.752234	2.84712e-73
ENSG00000105810.5	CDK6	-0.480387	2.1606e-31
ENSG00000134058.6	CDK7	-0.687262	1.9773e-24
ENSG00000136807.7	CDK9	0.183685	0.000285063
ENSG00000138769.6	CDKL2	-3.09176	0.0205051
ENSG00000006837.7	CDKL3	0.527952	0.00348282
ENSG00000008086.6	CDKL5	0.782173	1.03993e-05
ENSG00000124762.9	CDKN1A	2.23307	3.72697e-45
ENSG00000111276.6	CDKN1B	-0.421976	1.71724e-15
ENSG00000129757.8	CDKN1C	1.54957	1.0978e-11
ENSG00000147889.12	CDKN2A	0.898056	1.23411e-55
ENSG00000237190.3	CDKN2AIPNL	-0.348896	2.37639e-08
ENSG00000147883.9	CDKN2B	1.76684	1.49784e-96
ENSG00000123080.6	CDKN2C	0.575686	3.64341e-53
ENSG00000129355.6	CDKN2D	0.626349	1.0666e-32
ENSG00000100526.15	CDKN3	-0.278477	1.33127e-06
ENSG00000185267.5	CDNF	1.09349	1.18732e-10
ENSG00000140743.3	CDR2	-0.385097	2.25505e-11
ENSG00000101290.9	CDS2	-0.144995	0.000517535
ENSG00000167513.4	CDT1	0.497857	7.61606e-24
ENSG00000091527.11	CDV3	-0.611821	4.72199e-29
ENSG00000153046.13	CDYL	-0.347423	8.05278e-10
ENSG00000079385.17	CEACAM1	1.18622	0.000762835
ENSG00000007129.13	CEACAM21	-0.369	5.96352e-05
ENSG00000086548.8	CEACAM6	4.45461	0.00124806
ENSG00000153879.4	CEBPG	-0.715749	1.61085e-93
ENSG00000115816.9	CEBPZ	-0.734574	6.83465e-25
ENSG00000093072.11	CECR1	0.238009	6.67474e-07
ENSG00000069998.8	CECR5	-0.782042	4.03982e-35
ENSG00000170835.10	CEL	1.72004	9.5833e-15
ENSG00000149187.13	CELF1	-0.19336	7.6504e-07
ENSG00000048740.13	CELF2	-2.41025	0.000451738
ENSG00000075275.12	CELSR1	0.327422	7.93998e-06
ENSG00000143126.7	CELSR2	0.49235	2.5502e-10
ENSG00000008300.10	CELSR3	0.26475	0.000128681
ENSG00000184524.5	CEND1	-0.413328	2.51525e-09
ENSG00000145241.6	CENPC	0.23277	0.000194504
ENSG00000138778.7	CENPE	-0.368572	2.78288e-07
ENSG00000117724.8	CENPF	-0.271763	1.18422e-08
ENSG00000102384.9	CENPI	0.572458	5.72877e-17
ENSG00000151849.10	CENPJ	0.558018	2.12158e-17
ENSG00000123219.8	CENPK	0.196799	0.00294106
ENSG00000120334.11	CENPL	-0.388473	5.06096e-09
ENSG00000100162.10	CENPM	0.602769	4.72186e-51
ENSG00000166451.9	CENPN	0.131178	0.0483957
ENSG00000138092.6	CENPO	0.339286	8.95353e-09
ENSG00000188312.9	CENPP	0.367414	9.13866e-07
ENSG00000031691.6	CENPQ	0.202475	0.0249567
ENSG00000102901.8	CENPT	0.444904	1.18466e-24
ENSG00000166582.5	CENPV	0.265981	0.00281269
ENSG00000154240.12	CEP112	0.962196	3.94272e-08
ENSG00000100629.12	CEP128	0.618148	4.79694e-29
ENSG00000174799.6	CEP135	-0.14901	0.0379188
ENSG00000103995.9	CEP152	0.624085	2.04402e-16
ENSG00000110274.10	CEP164	-0.290314	2.11231e-06
ENSG00000143702.11	CEP170	-0.176747	0.00187694
ENSG00000174007.7	CEP19	-0.464036	4.25843e-09
ENSG00000101639.14	CEP192	0.282181	2.61214e-08
ENSG00000126001.11	CEP250	0.216132	0.000546364
ENSG00000135837.11	CEP350	-0.789597	8.82326e-46
ENSG00000164118.8	CEP44	0.138751	0.0231362
ENSG00000138180.11	CEP55	-0.228264	0.00831449
ENSG00000166037.6	CEP57	-0.23732	1.06377e-05
ENSG00000114107.4	CEP70	-0.153978	0.0247299
ENSG00000112877.6	CEP72	0.33964	8.11251e-08
ENSG00000130695.9	CEP85	0.149333	0.0185262
ENSG00000111860.9	CEP85L	-0.463421	7.04319e-12
ENSG00000121289.13	CEP89	0.343924	1.35995e-06
ENSG00000258890.2	CEP95	-0.287376	3.57359e-05
ENSG00000182504.6	CEP97	-0.34581	1.78356e-06
ENSG00000134255.9	CEPT1	-0.224253	0.000845459
ENSG00000167123.14	CERCAM	1.71485	2.74858e-33
ENSG00000100422.9	CERK	-0.316737	1.28442e-15
ENSG00000090661.7	CERS4	0.218112	2.89874e-06
ENSG00000000971.11	CFH	5.86874	5.60338e-07
ENSG00000172757.8	CFL1	0.494015	2.39359e-35
ENSG00000165410.10	CFL2	0.269862	0.00699926
ENSG00000003402.15	CFLAR	-0.396129	1.48183e-23
ENSG00000126759.8	CFP	1.29553	0.0017328
ENSG00000163320.6	CGGBP1	-0.165061	0.000710638
ENSG00000100532.7	CGRRF1	-0.860287	2.75494e-16
ENSG00000128965.7	CHAC1	0.296914	4.63772e-15
ENSG00000143942.4	CHAC2	-0.428585	3.61569e-05
ENSG00000100399.11	CHADL	1.36562	0.00911369
ENSG00000167670.11	CHAF1A	0.113003	0.00987312
ENSG00000159259.7	CHAF1B	0.44288	1.00719e-12
ENSG00000198824.4	CHAMP1	-0.464128	1.53383e-07
ENSG00000250479.4	CHCHD10	0.36926	0.0272526
ENSG00000106554.7	CHCHD3	-0.253984	9.12252e-08
ENSG00000163528.8	CHCHD4	-0.401761	2.18132e-05
ENSG00000125611.11	CHCHD5	0.193042	0.0180372
ENSG00000170791.13	CHCHD7	0.708257	1.12909e-64
ENSG00000153922.6	CHD1	-1.71682	1.10348e-56
ENSG00000131778.13	CHD1L	-0.511015	4.89556e-12
ENSG00000173575.14	CHD2	-0.410005	2.34685e-34
ENSG00000170004.12	CHD3	0.31674	5.44431e-06
ENSG00000111642.10	CHD4	-0.207164	3.58321e-09
ENSG00000171316.7	CHD7	-0.516255	2.99476e-42
ENSG00000100888.8	CHD8	-0.95036	5.70241e-119
ENSG00000177200.11	CHD9	-0.643419	1.22932e-35
ENSG00000183765.16	CHEK2	0.225265	0.00680496
ENSG00000085872.10	CHERP	0.936854	4.30894e-37
ENSG00000072609.13	CHFR	-0.26598	2.7588e-08
ENSG00000100604.8	CHGA	-2.89296	0.0381638
ENSG00000133048.8	CHI3L1	-6.33721	6.7441e-17
ENSG00000064886.9	CHI3L2	-1.57428	6.18065e-18
ENSG00000204116.7	CHIC1	-0.35827	0.00368969
ENSG00000109220.6	CHIC2	0.129951	0.0321819
ENSG00000133063.11	CHIT1	0.432149	8.18119e-05
ENSG00000100288.15	CHKB	0.414389	0.0407983
ENSG00000131165.10	CHMP1A	0.147384	0.0063163
ENSG00000255112.2	CHMP1B	0.547232	1.17944e-22
ENSG00000130724.4	CHMP2A	0.437416	2.82102e-12
ENSG00000083937.4	CHMP2B	-0.421214	1.25502e-07
ENSG00000254505.4	CHMP4A	1.32467	1.93637e-17
ENSG00000101421.3	CHMP4B	0.149906	6.3549e-05
ENSG00000086065.9	CHMP5	-0.299429	1.97473e-05
ENSG00000176108.5	CHMP6	0.683949	5.04768e-16
ENSG00000147457.9	CHMP7	-0.251152	2.5822e-11
ENSG00000128656.9	CHN1	-2.57816	0.00281766
ENSG00000110172.7	CHORDC1	0.213042	0.000378644
ENSG00000187446.7	CHP1	-0.112897	0.0360331
ENSG00000033100.10	CHPF2	0.297717	2.54629e-16
ENSG00000104472.5	CHRAC1	0.636814	2.68388e-20
ENSG00000090539.11	CHRD	2.36566	5.22501e-05
ENSG00000101938.10	CHRDL1	-3.18938	0.0401602
ENSG00000133019.7	CHRM3	-3.61162	0.0119039
ENSG00000120903.6	CHRNA2	-1.06821	0.0102161
ENSG00000147434.4	CHRNA6	-0.304718	0.0239782
ENSG00000174343.5	CHRNA9	-3.29279	0.0225984
ENSG00000170175.6	CHRNB1	-0.498531	0.00033296
ENSG00000160716.4	CHRNB2	0.944724	6.79142e-10
ENSG00000196811.7	CHRNG	1.23262	1.25391e-17
ENSG00000115526.6	CHST10	-1.0259	1.84937e-39
ENSG00000171310.6	CHST11	0.785343	8.79097e-10
ENSG00000136213.7	CHST12	0.165187	0.00820035
ENSG00000169105.6	CHST14	0.608377	1.5537e-13
ENSG00000182022.13	CHST15	-0.173632	0.000105245
ENSG00000122863.5	CHST3	-3.9013	4.91212e-05
ENSG00000140835.8	CHST4	-1.04082	2.67003e-10
ENSG00000183196.4	CHST6	2.38626	1.75192e-15
ENSG00000131873.5	CHSY1	-0.310598	0.000135868
ENSG00000127586.12	CHTF18	0.723587	5.29349e-54
ENSG00000168802.8	CHTF8	-0.91833	1.59081e-54
ENSG00000160679.8	CHTOP	-0.377873	1.51584e-07
ENSG00000213341.6	CHUK	-0.649369	2.3918e-23
ENSG00000258289.3	CHURC1	-0.438066	1.99082e-12
ENSG00000144021.2	CIAO1	-0.225328	4.7231e-06
ENSG00000005194.10	CIAPIN1	-0.656379	1.76249e-15
ENSG00000185043.6	CIB1	-0.315538	7.17392e-05
ENSG00000136425.8	CIB2	2.23703	0.0250135
ENSG00000079432.3	CIC	0.673598	9.3603e-23
ENSG00000179583.13	CIITA	0.834204	1.07319e-39
ENSG00000138615.4	CILP	3.45509	0.0226183
ENSG00000100865.10	CINP	-0.386365	3.21357e-08
ENSG00000099622.9	CIRBP	0.180878	0.0029939
ENSG00000141076.13	CIRH1A	-0.578877	2.63982e-16
ENSG00000122873.7	CISD1	-0.314665	6.661e-06
ENSG00000145354.5	CISD2	0.124563	0.0418585
ENSG00000114737.11	CISH	1.70544	0.00450009
ENSG00000122966.9	CIT	0.488201	4.0253e-36
ENSG00000164442.8	CITED2	1.12119	9.6243e-80
ENSG00000148337.15	CIZ1	0.553141	5.00578e-13
ENSG00000136108.10	CKAP2	-0.181643	0.000866881
ENSG00000169607.8	CKAP2L	-0.171524	0.00314942
ENSG00000136026.9	CKAP4	-0.256234	0.000656993
ENSG00000175216.10	CKAP5	-0.130143	0.0083038
ENSG00000166165.8	CKB	0.422883	1.56901e-06
ENSG00000104879.4	CKM	1.6075	0.0225732
ENSG00000173207.8	CKS1B	0.113102	0.00196569
ENSG00000123975.4	CKS2	-0.213292	1.55766e-06
ENSG00000074054.13	CLASP1	-0.108033	0.0122289
ENSG00000163539.11	CLASP2	-0.460017	1.2722e-21
ENSG00000104859.10	CLASRP	0.435691	2.46574e-16
ENSG00000175505.9	CLCF1	1.45251	0.00368236
ENSG00000114859.10	CLCN2	1.05765	1.07297e-17
ENSG00000109572.9	CLCN3	-0.786868	5.86545e-64
ENSG00000073464.7	CLCN4	-1.39348	3.86437e-60
ENSG00000011021.17	CLCN6	0.441474	5.91788e-06
ENSG00000103249.13	CLCN7	0.403017	5.1889e-19
ENSG00000163347.5	CLDN1	4.85117	0.000924799
ENSG00000157224.11	CLDN12	-0.608822	0.000102344
ENSG00000165376.6	CLDN2	4.46945	0.000624734
ENSG00000253958.1	CLDN23	-0.970837	0.000656503
ENSG00000184113.8	CLDN5	0.984983	2.87086e-05
ENSG00000181885.14	CLDN7	1.80262	1.36628e-10
ENSG00000213937.3	CLDN9	3.01005	3.57191e-14
ENSG00000080822.12	CLDND1	-0.182465	0.0269141
ENSG00000160318.2	CLDND2	1.0303	1.6559e-14
ENSG00000038532.10	CLEC16A	0.164571	0.000483066
ENSG00000187912.7	CLEC17A	1.96776	1.38368e-11
ENSG00000069493.10	CLEC2D	-0.567894	4.40017e-19
ENSG00000184293.3	CLECL1	-0.740908	6.63061e-06
ENSG00000153132.8	CLGN	2.09444	9.43975e-101
ENSG00000213719.4	CLIC1	0.11141	0.0263807
ENSG00000169583.12	CLIC3	1.7002	1.02937e-11
ENSG00000169504.10	CLIC4	-0.175699	0.0013712
ENSG00000113282.9	CLINT1	-0.513904	6.2427e-33
ENSG00000130779.15	CLIP1	-0.474445	7.6348e-12
ENSG00000106665.11	CLIP2	0.285689	0.00185468
ENSG00000105270.10	CLIP3	1.11231	2.69772e-22
ENSG00000013441.11	CLK1	-0.168117	0.00147269
ENSG00000176444.14	CLK2	0.445822	9.43918e-20
ENSG00000179335.14	CLK3	0.233854	9.36255e-06
ENSG00000113240.8	CLK4	-0.145167	0.0196701
ENSG00000188603.12	CLN3	-0.347142	0.0148299
ENSG00000182372.6	CLN8	0.79474	4.78027e-21
ENSG00000074201.4	CLNS1A	-0.145496	0.0208605
ENSG00000172409.5	CLP1	-0.33281	0.000200716
ENSG00000162129.8	CLPB	-0.300045	9.73292e-06
ENSG00000125656.4	CLPP	-0.111284	0.0426323
ENSG00000104853.11	CLPTM1	0.2792	0.00103355
ENSG00000166855.5	CLPX	-0.218503	0.00057235
ENSG00000092853.9	CLSPN	0.264109	3.14509e-11
ENSG00000139182.9	CLSTN3	0.586703	1.38241e-22
ENSG00000122705.12	CLTA	-0.146188	0.000753759
ENSG00000175416.8	CLTB	0.233058	0.000174482
ENSG00000141367.7	CLTC	-0.48788	7.57905e-28
ENSG00000070371.11	CLTCL1	0.643359	5.54353e-14
ENSG00000120885.15	CLU	-1.15623	7.34938e-09
ENSG00000132361.12	CLUH	-0.365928	1.03123e-09
ENSG00000125246.11	CLYBL	0.327216	0.00208253
ENSG00000103121.4	CMC2	-0.181062	0.0291754
ENSG00000153815.12	CMIP	0.311977	2.67737e-05
ENSG00000134326.7	CMPK2	4.31948	0.00219485
ENSG00000184220.6	CMSS1	-0.379419	7.86326e-09
ENSG00000091317.7	CMTM6	-0.551851	2.08089e-13
ENSG00000170293.4	CMTM8	-5.15132	5.92334e-06
ENSG00000180917.12	CMTR2	-0.766327	1.52622e-21
ENSG00000150656.10	CNDP1	3.472	0.0123838
ENSG00000133313.10	CNDP2	0.34448	1.03701e-05
ENSG00000105427.5	CNFN	-1.09235	0.0046925
ENSG00000100528.7	CNIH1	-0.161109	0.0379389
ENSG00000174871.6	CNIH2	1.95884	2.96834e-27
ENSG00000143786.3	CNIH3	0.647319	4.90702e-06
ENSG00000149970.10	CNKSR2	-6.74109	2.63353e-60
ENSG00000153721.13	CNKSR3	-2.88314	0.0406029
ENSG00000130176.3	CNN1	2.52754	0.000211013
ENSG00000064666.10	CNN2	0.259663	3.34012e-05
ENSG00000117519.11	CNN3	-3.34129	2.26084e-13
ENSG00000148842.13	CNNM2	0.430202	1.45905e-13
ENSG00000168763.11	CNNM3	0.655706	2.34472e-09
ENSG00000158158.7	CNNM4	1.14839	5.19907e-70
ENSG00000125107.12	CNOT1	-0.428875	7.71799e-40
ENSG00000182973.14	CNOT10	-0.158809	0.000997445
ENSG00000111596.7	CNOT2	-0.470755	1.48911e-16
ENSG00000088038.13	CNOT3	0.549417	1.64413e-20
ENSG00000080802.14	CNOT4	0.212486	0.000433858
ENSG00000113300.7	CNOT6	0.130546	0.0149843
ENSG00000138767.8	CNOT6L	-0.675651	1.9702e-29
ENSG00000198791.7	CNOT7	-0.866502	2.02223e-33
ENSG00000155508.9	CNOT8	-0.371582	1.15035e-07
ENSG00000173786.12	CNP	0.379764	2.06961e-16
ENSG00000137161.12	CNPY3	0.242285	4.67571e-08
ENSG00000118432.11	CNR1	-0.0863574	0.0166135
ENSG00000162852.9	CNST	-0.987536	4.54042e-61
ENSG00000105219.4	CNTD2	2.37378	0.000707471
ENSG00000044459.10	CNTLN	-2.15777	6.20697e-103
ENSG00000018236.10	CNTN1	3.56566	2.54289e-10
ENSG00000108797.7	CNTNAP1	0.395174	0.000243551
ENSG00000174469.13	CNTNAP2	-1.76004	3.09877e-08
ENSG00000106714.13	CNTNAP3	4.57194	0.00113134
ENSG00000154529.10	CNTNAP3B	4.86953	0.000303992
ENSG00000152910.14	CNTNAP4	-3.37213	1.0272e-22
ENSG00000119397.12	CNTRL	-0.351069	6.37626e-20
ENSG00000170037.9	CNTROB	0.441878	2.52534e-12
ENSG00000183978.7	COA3	-0.480536	1.10686e-10
ENSG00000181924.6	COA4	-0.572074	2.13276e-13
ENSG00000168275.10	COA6	-0.353983	4.91428e-05
ENSG00000068120.10	COASY	0.147171	0.0208988
ENSG00000106078.13	COBL	-2.16695	0.00936716
ENSG00000082438.11	COBLL1	-1.66634	3.11933e-102
ENSG00000100473.11	COCH	0.614818	1.25377e-34
ENSG00000166685.7	COG1	0.276511	4.49386e-05
ENSG00000135775.9	COG2	-0.980354	4.07665e-43
ENSG00000136152.10	COG3	-0.163669	2.09307e-05
ENSG00000103051.14	COG4	-0.143382	0.00310286
ENSG00000133103.12	COG6	-0.34873	3.11152e-05
ENSG00000213380.9	COG8	0.269327	1.78453e-05
ENSG00000121058.4	COIL	-0.586243	1.03634e-10
ENSG00000060718.14	COL11A1	-4.29254	1.3531e-07
ENSG00000204248.6	COL11A2	1.18694	7.34394e-11
ENSG00000082293.8	COL19A1	-2.04925	8.86794e-05
ENSG00000101203.12	COL20A1	1.74854	0.000267064
ENSG00000169436.12	COL22A1	-3.20622	0.0195266
ENSG00000139219.13	COL2A1	1.88565	6.5571e-07
ENSG00000187498.10	COL4A1	-2.19268	0.00104059
ENSG00000134871.13	COL4A2	0.489421	0.00440876
ENSG00000169031.14	COL4A3	1.06712	1.07389e-68
ENSG00000113163.11	COL4A3BP	0.186944	1.58572e-05
ENSG00000081052.10	COL4A4	0.435374	4.29366e-13
ENSG00000142156.10	COL6A1	-5.47475	2.214e-06
ENSG00000142173.10	COL6A2	-3.25296	0.000221459
ENSG00000114270.11	COL7A1	1.716	1.57583e-30
ENSG00000171812.6	COL8A2	1.62422	1.14913e-07
ENSG00000049089.9	COL9A2	-0.239996	0.000110783
ENSG00000092758.11	COL9A3	-0.883414	1.26587e-16
ENSG00000130309.6	COLGALT1	0.356878	3.45623e-10
ENSG00000198756.6	COLGALT2	-2.03527	0.0012362
ENSG00000145781.4	COMMD10	0.363314	0.00022345
ENSG00000114744.4	COMMD2	-0.389173	2.3274e-08
ENSG00000140365.11	COMMD4	0.509271	2.24016e-21
ENSG00000169019.9	COMMD8	-0.232357	0.0211971
ENSG00000110442.7	COMMD9	-0.310467	0.0241401
ENSG00000093010.7	COMT	-0.252627	1.8096e-09
ENSG00000165644.6	COMTD1	-0.451074	9.32971e-18
ENSG00000129083.8	COPB1	-0.336645	5.29746e-08
ENSG00000184432.5	COPB2	-0.351824	7.09949e-13
ENSG00000105669.8	COPE	0.203851	6.60309e-07
ENSG00000158623.10	COPG2	-0.488224	9.10577e-07
ENSG00000172301.6	COPRS	0.340439	0.000437043
ENSG00000166200.10	COPS2	-0.620524	6.70915e-16
ENSG00000141030.8	COPS3	-0.67122	3.89079e-18
ENSG00000138663.4	COPS4	-0.406058	2.12984e-06
ENSG00000121022.9	COPS5	-0.207555	6.65498e-05
ENSG00000168090.5	COPS6	0.369483	1.94788e-08
ENSG00000198612.6	COPS8	0.226624	0.000118987
ENSG00000005243.5	COPZ2	-1.60938	8.40197e-08
ENSG00000135469.9	COQ10A	0.332111	1.22459e-05
ENSG00000115520.4	COQ10B	-0.564341	1.33129e-12
ENSG00000173085.9	COQ2	-0.372089	6.86282e-05
ENSG00000132423.6	COQ3	-0.736902	0.000285068
ENSG00000110871.10	COQ5	-0.3791	3.26311e-05
ENSG00000088682.9	COQ9	-0.180487	0.00988956
ENSG00000106789.8	CORO2A	2.45836	5.67833e-11
ENSG00000103647.8	CORO2B	-0.400467	0.00106062
ENSG00000167549.14	CORO6	0.286284	0.00405229
ENSG00000262246.1	CORO7	0.271363	9.12338e-05
ENSG00000103187.6	COTL1	-1.08505	2.28411e-75
ENSG00000006695.6	COX10	-0.714764	3.77497e-15
ENSG00000163626.12	COX18	0.174676	0.00288655
ENSG00000240230.1	COX19	-0.358725	6.20779e-09
ENSG00000203667.5	COX20	0.568391	9.4476e-11
ENSG00000131143.4	COX4I1	0.179825	0.000109213
ENSG00000178741.7	COX5A	0.333305	1.59099e-12
ENSG00000135940.2	COX5B	0.190634	0.0044087
ENSG00000126267.4	COX6B1	0.297863	2.62902e-07
ENSG00000160471.8	COX6B2	1.54724	7.33514e-06
ENSG00000161281.6	COX7A1	2.07254	2.32822e-06
ENSG00000115944.10	COX7A2L	-0.499394	1.73607e-16
ENSG00000131174.4	COX7B	-0.221622	0.0141192
ENSG00000176340.3	COX8A	0.176027	0.00998425
ENSG00000160111.8	CPAMD8	0.84653	0.0101275
ENSG00000109472.9	CPE	-4.92855	7.03326e-05
ENSG00000137449.11	CPEB2	0.732516	3.9416e-15
ENSG00000107864.10	CPEB3	0.505296	6.96269e-06
ENSG00000113742.8	CPEB4	-0.936965	3.80424e-75
ENSG00000106034.13	CPED1	1.19617	7.72804e-07
ENSG00000145920.10	CPLX2	4.7462	4.99392e-25
ENSG00000135678.7	CPM	1.8296	7.04914e-07
ENSG00000214078.7	CPNE1	0.190689	1.64986e-05
ENSG00000140848.12	CPNE2	0.603343	2.70099e-36
ENSG00000085719.7	CPNE3	-0.280886	0.00205203
ENSG00000100884.5	CPNE6	0.944987	1.1759e-05
ENSG00000103381.7	CPPED1	-0.582784	8.73746e-17
ENSG00000021826.10	CPS1	2.11065	0.000711398
ENSG00000071894.10	CPSF1	0.68791	1.47e-59
ENSG00000165934.8	CPSF2	-0.864577	2.11647e-45
ENSG00000119203.9	CPSF3	-0.203265	0.00015303
ENSG00000127054.14	CPSF3L	0.167236	5.39466e-05
ENSG00000160917.10	CPSF4	-0.329831	2.61872e-10
ENSG00000111605.12	CPSF6	0.208987	9.5005e-11
ENSG00000110090.8	CPT1A	-0.253781	0.000286324
ENSG00000205560.8	CPT1B	0.329562	0.0293062
ENSG00000157184.5	CPT2	-0.595926	2.5833e-12
ENSG00000088882.7	CPXM1	0.354749	1.42066e-09
ENSG00000117322.12	CR2	0.815178	3.57352e-13
ENSG00000204788.3	CR769776.1	1.63661	0.0438899
ENSG00000169372.8	CRADD	-0.417674	0.000553825
ENSG00000148204.7	CRB2	1.61489	1.71627e-18
ENSG00000130545.11	CRB3	-0.943448	0.0284296
ENSG00000113851.9	CRBN	-0.257305	0.000540761
ENSG00000241258.2	CRCP	-0.425303	2.88267e-09
ENSG00000118260.10	CREB1	-0.208849	8.1765e-07
ENSG00000182158.10	CREB3L2	0.0978166	0.0156139
ENSG00000060566.9	CREB3L3	3.44067	0.0314752
ENSG00000143578.11	CREB3L4	0.605974	4.25286e-15
ENSG00000111269.2	CREBL2	-0.788079	1.72332e-16
ENSG00000164463.8	CREBRF	0.230962	0.000950067
ENSG00000137504.9	CREBZF	0.508745	1.93896e-27
ENSG00000143162.7	CREG1	-0.531843	3.16268e-10
ENSG00000163703.13	CRELD1	0.363249	2.38705e-06
ENSG00000184164.10	CRELD2	0.517429	1.58188e-25
ENSG00000145708.6	CRHBP	1.21755	2.14508e-24
ENSG00000213145.5	CRIP1	0.8746	1.03356e-05
ENSG00000257341.1	CRIP1	0.880843	0.0017656
ENSG00000146215.9	CRIP3	3.72611	0.0210393
ENSG00000179979.7	CRIPAK	0.687213	1.04461e-05
ENSG00000119878.5	CRIPT	0.425718	1.03607e-06
ENSG00000121005.4	CRISPLD1	-3.01613	0.0480651
ENSG00000167193.7	CRK	-0.93403	2.35899e-55
ENSG00000099942.8	CRKL	-0.31577	2.03731e-22
ENSG00000006016.6	CRLF1	0.492231	0.0437032
ENSG00000205755.6	CRLF2	-0.573156	0.00363752
ENSG00000176390.10	CRLF3	-0.601722	6.24347e-35
ENSG00000072832.10	CRMP1	-4.10103	0.000388522
ENSG00000101343.10	CRNKL1	-0.634066	7.36357e-21
ENSG00000058453.12	CROCC	0.651386	5.40125e-26
ENSG00000005469.7	CROT	0.29283	0.00185449
ENSG00000170275.10	CRTAP	0.451154	7.14303e-10
ENSG00000105662.11	CRTC1	0.481613	1.97616e-08
ENSG00000160741.12	CRTC2	0.248445	0.00107494
ENSG00000140577.11	CRTC3	-0.749292	4.14865e-09
ENSG00000109846.3	CRYAB	-2.64121	1.16137e-06
ENSG00000233280.2	CRYBG3	-1.54401	5.54518e-12
ENSG00000080200.5	CRYBG3	-2.09112	2.3009e-10
ENSG00000213139.3	CRYGS	0.61329	0.000195679
ENSG00000103316.6	CRYM	1.49522	0.000490124
ENSG00000116791.9	CRYZ	-0.295116	0.00730877
ENSG00000205758.7	CRYZL1	0.694022	5.12849e-23
ENSG00000139631.14	CSAD	0.72927	8.89174e-24
ENSG00000172346.10	CSDC2	2.46114	4.05774e-16
ENSG00000009307.11	CSDE1	-0.446924	6.96138e-22
ENSG00000124207.12	CSE1L	-0.824073	1.73504e-41
ENSG00000108342.8	CSF3	4.03672	0.0240149
ENSG00000119535.13	CSF3R	0.834596	0.0225802
ENSG00000147408.10	CSGALNACT1	1.70887	0.01839
ENSG00000169826.6	CSGALNACT2	0.204559	0.00216939
ENSG00000103653.12	CSK	-0.385025	1.55972e-11
ENSG00000121904.13	CSMD2	-3.5488	0.0113549
ENSG00000113712.12	CSNK1A1	-0.249839	1.91873e-11
ENSG00000213923.6	CSNK1E	0.134937	0.00949355
ENSG00000169118.11	CSNK1G1	-0.724462	9.75247e-17
ENSG00000133275.11	CSNK1G2	0.469978	2.65661e-41
ENSG00000101266.12	CSNK2A1	-0.341142	3.41128e-14
ENSG00000070770.4	CSNK2A2	-0.415009	1.55342e-21
ENSG00000204435.9	CSNK2B	0.586123	1.06182e-10
ENSG00000173546.7	CSPG4	-3.40135	7.51159e-07
ENSG00000104218.9	CSPP1	-0.189582	0.0499617
ENSG00000144655.10	CSRNP1	-0.388478	7.27802e-09
ENSG00000110925.2	CSRNP2	0.581172	1.2169e-15
ENSG00000159176.9	CSRP1	-0.963357	4.36607e-34
ENSG00000175183.5	CSRP2	1.54279	1.01548e-06
ENSG00000149474.9	CSRP2BP	-0.475533	1.50916e-06
ENSG00000175315.2	CST6	3.67531	0.038102
ENSG00000160213.5	CSTB	0.163324	0.00977481
ENSG00000101138.7	CSTF1	-0.519558	4.81068e-21
ENSG00000177613.7	CSTF2T	0.136664	0.00389071
ENSG00000150527.12	CTAGE5	0.279538	0.00497753
ENSG00000227450.2	CTB-58E17.5	1.07206	0.0003114
ENSG00000159692.11	CTBP1	0.294718	1.84002e-11
ENSG00000175029.12	CTBP2	1.24166	4.89863e-07
ENSG00000117151.8	CTBS	0.156128	0.0370478
ENSG00000245317.2	CTC-241N9.1	0.492157	0.000192087
ENSG00000262484.1	CTC-360G5.1	1.02033	0.00194623
ENSG00000268790.1	CTC-429P9.4	1.82395	0.0179918
ENSG00000261884.2	CTC-479C5.12	0.658207	5.87703e-08
ENSG00000253251.2	CTC-534A2.2	-0.679369	0.000879128
ENSG00000178971.9	CTC1	0.508392	3.28846e-10
ENSG00000102974.10	CTCF	-0.723833	1.01073e-40
ENSG00000269693.1	CTD-2192J16.20	-2.2835	1.90043e-07
ENSG00000268861.1	CTD-2207O23.3	-0.869224	0.0395715
ENSG00000188242.4	CTD-2228K2.5	0.313081	4.56227e-05
ENSG00000247121.2	CTD-2260A17.2	0.911727	1.93593e-17
ENSG00000228008.1	CTD-2330K9.3	1.01497	0.00237702
ENSG00000258875.1	CTD-2547L24.3	0.789589	0.0211971
ENSG00000269403.1	CTD-2616J11.11	0.853693	0.00177594
ENSG00000262874.1	CTD-2616J11.4	2.00535	0.0131862
ENSG00000188897.4	CTD-3088G3.8	0.978855	1.47769e-14
ENSG00000183248.7	CTD-3193O13.9	1.13356	0.0010384
ENSG00000245888.2	CTD-3203P2.2	0.898497	8.96169e-17
[truncated: 7,529 more rows]

## Sheet: WT vs. delta264
Feature	Feature_gene_name	log2FoldChange	padj
ENSG00000145416.9	MARCH1	0.236475	0.0239494
ENSG00000099785.6	MARCH2	0.235029	0.0124187
ENSG00000173926.5	MARCH3	0.673376	3.67258e-46
ENSG00000198060.5	MARCH5	-0.232824	0.000622454
ENSG00000136536.10	MARCH7	-0.54322	1.37543e-16
ENSG00000180096.7	SEPT1	0.867213	6.03872e-28
ENSG00000168385.13	SEPT2	-0.189496	3.32918e-05
ENSG00000100167.15	SEPT3	1.23745	0.000209989
ENSG00000108387.10	SEPT4	1.90994	2.09299e-07
ENSG00000125354.18	SEPT6	0.482603	1.71204e-39
ENSG00000122545.13	SEPT7	-0.491767	1.39358e-16
ENSG00000164402.9	SEPT8	0.240474	0.0101361
ENSG00000184640.13	SEPT9	0.126366	7.17528e-05
ENSG00000138758.7	SEPT11	-0.218143	2.2185e-06
ENSG00000121410.7	A1BG	1.29642	1.71391e-07
ENSG00000175899.10	A2M	0.865248	0.000183604
ENSG00000128274.11	A4GALT	-0.575552	4.59152e-35
ENSG00000094914.8	AAAS	-0.246103	3.27189e-05
ENSG00000081760.12	AACS	0.218756	1.37051e-05
ENSG00000109576.9	AADAT	3.8398	0.0408304
ENSG00000158122.7	AAED1	-0.584343	3.86994e-07
ENSG00000103591.8	AAGAB	-0.45665	7.3034e-13
ENSG00000115977.14	AAK1	1.04448	8.51933e-05
ENSG00000129673.5	AANAT	0.419708	0.0368468
ENSG00000090861.11	AARS	-0.188081	6.80118e-08
ENSG00000124608.4	AARS2	0.336634	3.48798e-09
ENSG00000266967.2	AARSD1	0.813727	0.00118155
ENSG00000149313.6	AASDHPPT	-0.655486	1.40806e-14
ENSG00000108270.6	AATF	-0.270238	4.86247e-06
ENSG00000183044.7	ABAT	0.225157	0.00849217
ENSG00000165029.11	ABCA1	-0.4264	7.65067e-21
ENSG00000167972.9	ABCA3	0.336321	0.0383127
ENSG00000154265.11	ABCA5	0.301938	0.0189488
ENSG00000064687.8	ABCA7	0.882382	1.59532e-103
ENSG00000154258.12	ABCA9	1.64314	0.000209279
ENSG00000135776.4	ABCB10	-0.258841	0.000213918
ENSG00000005471.11	ABCB4	-2.30078	4.58108e-17
ENSG00000115657.8	ABCB6	0.617079	0.00538995
ENSG00000131269.11	ABCB7	-0.378337	3.21674e-07
ENSG00000197150.8	ABCB8	0.436241	5.79049e-15
ENSG00000103222.14	ABCC1	0.274304	1.81614e-14
ENSG00000124574.10	ABCC10	0.805672	1.61426e-27
ENSG00000121270.11	ABCC11	2.32562	0.00597805
ENSG00000023839.6	ABCC2	0.652031	0.00309581
ENSG00000125257.9	ABCC4	-0.338552	2.68461e-07
ENSG00000114770.12	ABCC5	0.203191	0.00274084
ENSG00000101986.8	ABCD1	0.934077	1.84512e-34
ENSG00000117528.7	ABCD3	-0.328794	6.23938e-07
ENSG00000119688.16	ABCD4	0.330618	1.49641e-07
ENSG00000164163.6	ABCE1	-0.815094	6.65607e-25
ENSG00000204574.8	ABCF1	-0.256573	2.74063e-06
ENSG00000033050.3	ABCF2	-0.61103	6.32608e-38
ENSG00000161204.7	ABCF3	0.132907	0.0317345
ENSG00000143994.9	ABHD1	0.8551	9.68655e-08
ENSG00000144827.4	ABHD10	-0.781904	4.66638e-26
ENSG00000106077.14	ABHD11	0.758083	1.05198e-22
ENSG00000100997.14	ABHD12	0.289567	0.00116724
ENSG00000139826.5	ABHD13	0.273876	0.0249075
ENSG00000248487.4	ABHD14A	-0.604126	1.56993e-06
ENSG00000114779.15	ABHD14B	-0.285073	0.000405256
ENSG00000168792.4	ABHD15	0.569797	6.79313e-19
ENSG00000183260.5	ABHD16B	0.531488	1.26647e-05
ENSG00000129968.11	ABHD17A	0.214072	0.00134205
ENSG00000107362.9	ABHD17B	-0.212139	0.000391595
ENSG00000136379.7	ABHD17C	-2.03079	1.12104e-10
ENSG00000140526.12	ABHD2	-0.253299	0.000894683
ENSG00000158201.5	ABHD3	0.13177	0.000279685
ENSG00000100439.6	ABHD4	-0.581636	0.000324359
ENSG00000011198.3	ABHD5	1.32986	9.83693e-32
ENSG00000163686.9	ABHD6	-0.645492	2.79746e-13
ENSG00000127220.5	ABHD8	0.129943	0.00967122
ENSG00000136754.12	ABI1	-0.457624	2.87644e-22
ENSG00000138443.11	ABI2	-0.207527	3.81068e-05
ENSG00000108798.4	ABI3	0.277403	0.000170427
ENSG00000097007.13	ABL1	-0.390367	8.63623e-09
ENSG00000143322.15	ABL2	-0.810272	4.00355e-37
ENSG00000099204.14	ABLIM1	-0.409229	1.18181e-27
ENSG00000159842.10	ABR	0.666144	1.57593e-41
ENSG00000146386.7	ABRACL	-0.394749	8.32672e-08
ENSG00000146109.3	ABT1	-0.502012	1.94678e-19
ENSG00000114626.13	ABTB1	0.710988	2.47073e-12
ENSG00000166016.4	ABTB2	0.663126	0.00350598
ENSG00000268948.1	AC004017.1	1.68697	0.00889554
ENSG00000213888.2	AC005003.1	0.916728	3.7697e-31
ENSG00000206044.3	AC005841.1	1.13633	0.00866659
ENSG00000204957.1	AC006486.1	1.16242	1.03789e-25
ENSG00000234409.4	AC006547.14	0.834636	0.00863788
ENSG00000217075.1	AC007401.2	-3.01288	0.0472012
ENSG00000214109.3	AC008686.1	2.20129	0.000155365
ENSG00000216895.4	AC009403.2	0.98514	8.40482e-52
ENSG00000214248.2	AC010336.1	1.0324	2.29174e-09
ENSG00000226180.2	AC010536.1	0.589206	0.000131834
ENSG00000267216.1	AC010642.1	1.2772	2.16181e-19
ENSG00000269855.1	AC012313.1	2.70049	7.62245e-14
ENSG00000268396.1	AC012485.1	2.53569	0.0006252
ENSG00000231145.1	AC013468.1	2.91342	0.0314143
ENSG00000205147.3	AC016586.1	2.58815	1.05988e-08
ENSG00000186235.6	AC016757.3	2.52887	0.0049375
ENSG00000233538.1	AC017104.2	1.6449	4.07295e-08
ENSG00000235978.2	AC018816.3	-2.58622	0.000373217
ENSG00000268328.1	AC019206.1	1.23237	2.9115e-15
ENSG00000256530.1	AC019294.1	1.58515	0.000379421
ENSG00000225885.2	AC023590.1	0.943315	1.11502e-08
ENSG00000212997.1	AC023632.1	1.07817	0.0142005
ENSG00000177340.4	AC024940.1	1.67333	1.76996e-110
ENSG00000268509.1	AC026202.1	1.17976	0.00571494
ENSG00000268885.1	AC026740.1	0.684785	6.79277e-06
ENSG00000268838.1	AC027228.1	2.13768	0.000353314
ENSG00000268798.1	AC027307.3	2.14258	4.30112e-23
ENSG00000215067.5	AC027763.2	0.739682	0.000536667
ENSG00000222020.2	AC062017.1	1.30194	5.00536e-28
ENSG00000269165.1	AC069547.1	-1.02776	0.00471382
ENSG00000269657.1	AC079210.1	3.00261	0.000134519
ENSG00000267889.1	AC079354.2	1.65261	0.0161547
ENSG00000214708.4	AC090616.2	1.66097	1.24452e-05
ENSG00000203691.2	AC092811.1	-0.903199	0.00173841
ENSG00000269175.1	AC093157.1	-2.12701	0.0164942
ENSG00000269559.1	AC093677.1	1.37659	7.4644e-11
ENSG00000269302.1	AC110771.1	0.975281	2.11002e-14
ENSG00000176349.7	AC110781.3	0.659829	0.00922349
ENSG00000269506.1	AC110792.1	1.80354	0.00576014
ENSG00000204620.2	AC115618.1	0.956686	1.73099e-09
ENSG00000268175.1	AC117395.1	0.709476	0.00380386
ENSG00000268367.1	AC126614.1	1.65962	0.0240183
ENSG00000216921.3	AC131097.4	2.16991	0.00146513
ENSG00000183562.2	AC131971.1	1.31222	1.82771e-24
ENSG00000268403.1	AC132192.1	1.62013	1.43235e-19
ENSG00000268218.1	AC137932.1	-1.06645	1.4542e-08
ENSG00000269563.1	AC138655.1	1.19902	9.28044e-06
ENSG00000267270.1	AC139100.2	1.1217	1.42612e-12
ENSG00000269529.1	AC140061.12	3.35059	0.0403281
ENSG00000060971.13	ACAA1	0.634109	1.33651e-16
ENSG00000167315.13	ACAA2	-0.453768	1.06459e-21
ENSG00000132142.15	ACACA	-0.189475	2.44836e-05
ENSG00000076555.11	ACACB	-0.498609	6.79423e-19
ENSG00000111271.10	ACAD10	0.469353	2.20896e-15
ENSG00000177646.13	ACAD9	0.589136	1.0526e-24
ENSG00000117054.9	ACADM	-0.381972	5.54855e-17
ENSG00000122971.4	ACADS	0.817488	8.57005e-09
ENSG00000196177.8	ACADSB	0.37265	8.98974e-06
ENSG00000072778.15	ACADVL	0.561717	2.15109e-30
ENSG00000072818.7	ACAP1	0.148504	0.000114088
ENSG00000131584.14	ACAP3	0.48542	1.21868e-16
ENSG00000120437.7	ACAT2	-0.629061	5.31362e-20
ENSG00000182827.8	ACBD3	-0.26309	0.00113721
ENSG00000181513.10	ACBD4	0.423945	1.38236e-12
ENSG00000135847.5	ACBD6	0.242526	4.39972e-07
ENSG00000176244.6	ACBD7	0.219351	0.0363335
ENSG00000102977.9	ACD	0.384246	1.16522e-13
ENSG00000159640.10	ACE	0.840222	9.88793e-14
ENSG00000177076.4	ACER2	0.782181	1.77631e-07
ENSG00000078124.7	ACER3	-0.3421	9.67094e-06
ENSG00000087085.9	ACHE	1.35831	7.13191e-20
ENSG00000144648.10	ACKR2	0.656304	0.000293656
ENSG00000131473.12	ACLY	-0.503671	1.44178e-60
ENSG00000196636.7	ACN9	-0.296409	4.23086e-05
ENSG00000122729.14	ACO1	0.293337	0.000354495
ENSG00000100412.11	ACO2	-0.186331	0.000549831
ENSG00000172497.4	ACOT12	2.64796	0.000463306
ENSG00000112304.6	ACOT13	-0.227405	0.00246229
ENSG00000119673.10	ACOT2	0.703608	2.05208e-14
ENSG00000123130.12	ACOT9	1.43481	5.50374e-08
ENSG00000161533.7	ACOX1	0.295189	3.98669e-06
ENSG00000168306.8	ACOX2	2.60176	0.03359
ENSG00000087008.11	ACOX3	0.227422	0.000752218
ENSG00000153093.14	ACOXL	-0.946511	2.0977e-08
ENSG00000143727.11	ACP1	-0.491984	4.82238e-23
ENSG00000134575.5	ACP2	0.989066	2.10714e-24
ENSG00000102575.6	ACP5	2.32709	7.00734e-12
ENSG00000162836.7	ACP6	0.14604	0.0140726
ENSG00000142513.4	ACPT	-0.353244	0.00547165
ENSG00000111644.3	ACRBP	1.17157	6.79128e-13
ENSG00000147174.7	ACRC	1.06938	1.9565e-19
ENSG00000176715.11	ACSF3	0.205041	1.4793e-13
ENSG00000151726.9	ACSL1	-0.56388	3.77512e-26
ENSG00000123983.9	ACSL3	-0.738316	1.2163e-33
ENSG00000068366.15	ACSL4	-0.53424	1.01176e-14
ENSG00000197142.6	ACSL5	-0.155678	0.00733944
ENSG00000154930.10	ACSS1	0.459466	6.50466e-21
ENSG00000131069.15	ACSS2	0.750148	4.72955e-13
ENSG00000075624.9	ACTB	0.203922	4.97011e-05
ENSG00000184009.5	ACTG1	0.406431	7.2644e-30
ENSG00000182584.4	ACTL10	1.19389	7.6361e-62
ENSG00000136518.12	ACTL6A	-0.227205	1.88251e-06
ENSG00000130402.7	ACTN4	0.201959	0.000155888
ENSG00000131966.9	ACTR10	-0.501709	1.55462e-11
ENSG00000138107.7	ACTR1A	-0.720477	3.58255e-62
ENSG00000115073.6	ACTR1B	-0.121017	0.00128646
ENSG00000115091.7	ACTR3	-0.300634	9.7222e-11
ENSG00000133627.13	ACTR3B	0.671705	3.5427e-25
ENSG00000106526.6	ACTR3C	0.844347	5.41605e-14
ENSG00000101442.8	ACTR5	0.222026	0.00412333
ENSG00000075089.5	ACTR6	-0.542106	3.96765e-08
ENSG00000184378.2	ACTRT3	1.74668	1.57647e-21
ENSG00000135503.8	ACVR1B	-0.799982	2.94044e-11
ENSG00000121989.10	ACVR2A	-1.14759	3.43727e-06
ENSG00000114739.9	ACVR2B	-0.655588	1.13802e-20
ENSG00000119640.4	ACYP1	-0.228498	0.000118329
ENSG00000170634.8	ACYP2	0.671041	1.00991e-35
ENSG00000196839.8	ADA	-0.29764	3.51601e-16
ENSG00000168803.10	ADAL	-0.304779	0.00136048
ENSG00000137845.10	ADAM10	0.283287	8.73026e-11
ENSG00000073670.9	ADAM11	1.0238	9.41536e-12
ENSG00000151694.8	ADAM17	-0.407761	3.82006e-28
ENSG00000008277.10	ADAM22	0.44555	1.33559e-15
ENSG00000114948.8	ADAM23	0.360663	3.9109e-06
ENSG00000042980.8	ADAM28	-5.45602	1.14365e-05
ENSG00000197140.10	ADAM32	-1.11466	0.00544147
ENSG00000151651.11	ADAM8	-0.909782	3.30354e-13
ENSG00000168615.7	ADAM9	-0.546475	1.41355e-30
ENSG00000160323.14	ADAMTS13	1.33243	1.34495e-88
ENSG00000158859.9	ADAMTS4	0.662769	0.000968124
ENSG00000143382.9	ADAMTSL4	1.18189	1.2929e-06
ENSG00000203804.3	ADAMTSL4-AS1	1.95877	2.87209e-21
ENSG00000105963.9	ADAP1	1.35144	0.000348639
ENSG00000160710.11	ADAR	-0.298705	2.79275e-15
ENSG00000197381.11	ADARB1	1.68718	9.05272e-99
ENSG00000065457.6	ADAT1	0.509154	5.26211e-20
ENSG00000213638.4	ADAT3	0.483263	0.00352047
ENSG00000142920.12	ADC	0.735939	0.00262738
ENSG00000133597.5	ADCK2	-0.32714	3.00782e-07
ENSG00000163050.12	ADCK3	-0.12671	0.00922349
ENSG00000173137.7	ADCK5	0.831322	4.85455e-52
ENSG00000164742.10	ADCY1	1.37834	0.00412218
ENSG00000129467.9	ADCY4	0.988973	3.93453e-07
ENSG00000121281.8	ADCY7	-0.381371	6.39059e-12
ENSG00000162104.5	ADCY9	1.03221	6.6608e-21
ENSG00000087274.12	ADD1	-0.196122	3.27808e-07
ENSG00000148700.9	ADD3	-0.303911	1.7646e-08
ENSG00000197894.6	ADH5	-0.591958	1.08602e-20
ENSG00000147576.11	ADHFE1	1.95958	2.09657e-09
ENSG00000182551.9	ADI1	-0.456415	1.91774e-08
ENSG00000159346.8	ADIPOR1	-0.298533	8.16231e-10
ENSG00000006831.9	ADIPOR2	-0.786498	1.35003e-55
ENSG00000156110.9	ADK	0.48592	3.82313e-17
ENSG00000148926.5	ADM	0.329232	0.000938164
ENSG00000128165.7	ADM2	1.16456	7.0679e-43
ENSG00000101126.11	ADNP	-1.05512	8.76352e-93
ENSG00000181915.3	ADO	-0.141245	0.0147215
ENSG00000128271.15	ADORA2A	0.644116	0.000220755
ENSG00000159322.13	ADPGK	-0.89714	1.34999e-58
ENSG00000144843.7	ADPRH	-4.38429	0.00188164
ENSG00000116863.10	ADPRHL2	-0.762304	9.582e-29
ENSG00000222040.3	ADRA2B	3.98906	0.00411249
ENSG00000169252.4	ADRB2	1.31623	1.25498e-29
ENSG00000173020.6	ADRBK1	0.107454	0.00402504
ENSG00000100077.10	ADRBK2	-0.204791	0.000168014
ENSG00000239900.7	ADSL	-0.670351	2.82483e-23
ENSG00000035687.9	ADSS	0.368607	8.50904e-11
ENSG00000185100.6	ADSSL1	1.17543	1.77741e-16
ENSG00000259003.1	AE000662.92	0.772025	9.89888e-05
ENSG00000106624.4	AEBP1	1.14986	2.31476e-67
ENSG00000139154.10	AEBP2	0.97586	7.58952e-43
ENSG00000181026.13	AEN	-1.13685	9.4585e-121
ENSG00000104964.10	AES	0.783597	2.10182e-11
ENSG00000215346.3	AF131215.5	1.04201	3.63436e-17
ENSG00000169129.10	AFAP1L2	-0.361493	0.0335526
ENSG00000144218.14	AFF3	0.648597	6.5141e-37
ENSG00000072364.8	AFF4	-0.255313	2.08512e-08
ENSG00000141385.5	AFG3L2	-0.839854	6.97192e-46
ENSG00000183077.11	AFMID	0.217713	0.0153452
ENSG00000119844.10	AFTPH	-0.839096	6.31172e-51
ENSG00000204149.5	AGAP6	0.400092	4.12765e-05
ENSG00000165923.11	AGBL2	1.10266	5.67345e-11
ENSG00000146856.10	AGBL3	0.846888	1.60004e-26
ENSG00000084693.11	AGBL5	0.124084	0.00775885
ENSG00000204305.9	AGER	1.44633	9.36469e-34
ENSG00000173744.13	AGFG1	-0.241307	1.04625e-05
ENSG00000106351.8	AGFG2	0.209968	0.00114612
ENSG00000164252.8	AGGF1	-0.477132	1.6969e-17
ENSG00000006530.11	AGK	-0.274705	0.0400702
ENSG00000162688.11	AGL	-0.338671	3.1245e-08
ENSG00000116771.5	AGMAT	2.32371	1.71649e-25
ENSG00000092847.6	AGO1	0.231811	1.48475e-05
ENSG00000123908.7	AGO2	0.218634	3.90635e-05
ENSG00000126070.14	AGO3	0.376358	4.32412e-16
ENSG00000134698.10	AGO4	-1.03566	8.19703e-63
ENSG00000204310.6	AGPAT1	0.655822	3.9748e-14
ENSG00000169692.8	AGPAT2	-0.305563	1.73789e-07
ENSG00000155189.7	AGPAT5	-0.224832	1.41426e-05
ENSG00000158669.7	AGPAT6	-0.695672	3.67185e-60
ENSG00000018510.8	AGPS	-0.305642	3.13658e-09
ENSG00000188157.9	AGRN	0.90895	6.43086e-26
ENSG00000159723.4	AGRP	0.907288	0.0101363
ENSG00000135744.7	AGT	1.18573	0.0119846
ENSG00000135049.11	AGTPBP1	-0.53713	3.15564e-14
ENSG00000177674.11	AGTRAP	-0.728725	9.16864e-12
ENSG00000153207.10	AHCTF1	-0.516133	1.61214e-37
ENSG00000101444.8	AHCY	-0.189112	2.04957e-06
ENSG00000158467.12	AHCYL2	0.68312	8.85165e-23
ENSG00000126705.9	AHDC1	0.381367	4.73118e-05
ENSG00000135541.16	AHI1	0.16706	0.0454734
ENSG00000106546.8	AHR	0.149966	0.0300739
ENSG00000063438.12	AHRR	1.12535	0.00221073
ENSG00000100591.3	AHSA1	-0.315315	3.67546e-09
ENSG00000173209.18	AHSA2	0.640113	3.58057e-46
ENSG00000111732.6	AICDA	-0.709232	7.27314e-41
ENSG00000186063.8	AIDA	0.180305	0.0123376
ENSG00000204472.8	AIF1	-0.633858	0.0406093
ENSG00000126878.8	AIF1L	0.692044	0.031508
ENSG00000156709.9	AIFM1	-0.543277	2.04604e-18
ENSG00000042286.10	AIFM2	0.399261	0.0028949
ENSG00000183773.11	AIFM3	1.2458	0.000543688
ENSG00000112297.10	AIM1	-0.343905	6.62602e-23
ENSG00000106305.5	AIMP2	-0.640778	3.37105e-21
ENSG00000110711.5	AIP	-0.360971	8.60849e-16
ENSG00000160224.12	AIRE	1.23323	0.000161141
ENSG00000106992.13	AK1	1.68274	1.76005e-09
ENSG00000004455.12	AK2	-0.453363	1.09791e-29
ENSG00000147853.12	AK3	0.337562	2.08366e-09
ENSG00000023516.7	AKAP11	-0.388784	5.44386e-12
ENSG00000170776.15	AKAP13	-0.469005	3.18915e-39
ENSG00000197976.6	AKAP17A	0.272746	8.07296e-08
ENSG00000241978.5	AKAP2	0.576485	1.13503e-07
ENSG00000111254.3	AKAP3	0.588316	0.00427114
ENSG00000105127.4	AKAP8	-0.218181	8.26168e-06
ENSG00000011243.13	AKAP8L	0.0980539	0.0420358
ENSG00000127914.12	AKAP9	-0.139427	0.0189502
ENSG00000166452.7	AKIP1	-0.649929	2.88739e-10
ENSG00000174574.11	AKIRIN1	-0.340049	1.92983e-08
ENSG00000135334.8	AKIRIN2	0.398034	5.07052e-10
ENSG00000106948.12	AKNA	0.158007	1.55467e-05
ENSG00000117448.9	AKR1A1	-0.304915	9.55096e-11
ENSG00000085662.9	AKR1B1	-0.319797	5.3142e-12
ENSG00000122787.10	AKR1D1	1.86575	6.72062e-07
ENSG00000053371.8	AKR7A2	-0.192224	0.00427052
ENSG00000142208.11	AKT1	0.206838	0.000951585
ENSG00000204673.6	AKT1S1	0.582438	2.40064e-19
ENSG00000105221.12	AKT2	0.741119	2.84092e-92
ENSG00000223474.2	AL020996.1	1.52657	2.94814e-08
ENSG00000224997.1	AL049840.1	0.9501	1.25598e-11
ENSG00000269407.1	AL096677.1	1.22837	5.64437e-05
ENSG00000267848.1	AL118506.1	1.38073	3.17534e-05
ENSG00000215462.1	AL136218.1	2.17684	0.00465719
ENSG00000253459.3	AL139099.1	1.44088	1.37801e-15
ENSG00000268457.1	AL160175.1	1.32989	1.62094e-06
ENSG00000268578.1	AL354718.1	1.08008	3.66776e-11
ENSG00000224474.2	AL355490.1	0.707524	0.0175806
ENSG00000248835.2	AL357673.1	-0.580784	7.33617e-05
ENSG00000203286.4	AL365202.1	0.959978	0.0475643
ENSG00000268172.1	AL590452.1	1.04279	0.00136002
ENSG00000269620.1	AL590560.1	4.49292	0.000832742
ENSG00000232850.1	AL590708.2	1.19614	1.05395e-08
ENSG00000269337.1	AL591479.1	0.935224	7.00285e-14
ENSG00000231360.2	AL592284.1	1.17676	1.92188e-11
ENSG00000215014.3	AL645728.1	1.57397	7.78246e-30
ENSG00000268996.1	AL807752.1	1.52983	8.07825e-24
ENSG00000023330.10	ALAS1	-0.251239	9.38505e-06
ENSG00000158578.14	ALAS2	1.29001	0.0215463
ENSG00000170017.8	ALCAM	-0.278591	1.67721e-07
ENSG00000059573.4	ALDH18A1	-0.648356	7.26308e-51
ENSG00000184254.12	ALDH1A3	-0.654214	0.0137856
ENSG00000111275.8	ALDH2	-0.132334	0.00607028
ENSG00000072210.14	ALDH3A2	-1.21128	8.75169e-34
ENSG00000112294.8	ALDH5A1	-0.179758	1.45856e-06
ENSG00000119711.8	ALDH6A1	-0.16248	0.0135166
ENSG00000164904.11	ALDH7A1	2.10886	0.0103198
ENSG00000143149.8	ALDH9A1	-0.540954	5.14732e-20
ENSG00000136872.13	ALDOB	1.29642	0.00333376
ENSG00000109107.9	ALDOC	0.821001	1.0983e-21
ENSG00000139133.2	ALG10	-0.489861	0.000190106
ENSG00000175548.4	ALG10B	0.225376	0.0453178
ENSG00000253710.1	ALG11	-0.46743	3.11631e-05
ENSG00000101901.6	ALG13	0.906571	2.58375e-54
ENSG00000172339.9	ALG14	-0.476142	0.00659488
ENSG00000189366.5	ALG1L	-2.04897	0.0474908
ENSG00000119523.8	ALG2	0.149811	0.00772301
ENSG00000120697.4	ALG5	-0.73226	3.76017e-14
ENSG00000088035.11	ALG6	-0.467465	1.5857e-08
ENSG00000159063.8	ALG8	-0.456507	2.00932e-10
ENSG00000086848.10	ALG9	-0.350459	0.000118101
ENSG00000100601.5	ALKBH1	-0.634136	7.29183e-11
ENSG00000189046.6	ALKBH2	-2.17834	2.15605e-243
ENSG00000160993.3	ALKBH4	0.865613	9.87785e-29
ENSG00000091542.8	ALKBH5	-0.324584	8.40473e-12
ENSG00000125652.3	ALKBH7	-0.143568	0.0167442
ENSG00000137760.10	ALKBH8	-0.804977	8.37944e-17
ENSG00000116127.13	ALMS1	-0.141324	0.0114286
ENSG00000108839.7	ALOX12	1.10526	2.9418e-06
ENSG00000179477.5	ALOX12B	1.03827	0.00301784
ENSG00000012779.6	ALOX5	0.518008	4.56512e-33
ENSG00000132965.5	ALOX5AP	-0.860731	4.08651e-27
ENSG00000183684.6	ALYREF	-0.147779	0.0270641
ENSG00000242110.3	AMACR	0.891194	8.19876e-14
ENSG00000110497.10	AMBRA1	-0.272458	7.25355e-07
ENSG00000123505.10	AMD1	-0.583298	2.66275e-39
ENSG00000139344.3	AMDHD1	0.618467	0.0326477
ENSG00000162066.10	AMDHD2	0.824191	5.81195e-18
ENSG00000184675.5	AMER1	-0.218521	0.00225661
ENSG00000159461.10	AMFR	-0.132804	0.00492371
ENSG00000104899.4	AMH	1.88328	7.16335e-28
ENSG00000160593.13	AMICA1	0.561865	3.79059e-20
ENSG00000181754.6	AMIGO1	3.27679	9.14649e-14
ENSG00000101935.5	AMMECR1	-0.557974	4.96845e-38
ENSG00000144233.5	AMMECR1L	-0.903278	3.61426e-44
ENSG00000166126.6	AMN	-1.01669	1.20296e-56
ENSG00000116337.11	AMPD2	0.17268	0.0087494
ENSG00000133805.11	AMPD3	-0.201355	0.00205519
ENSG00000145020.10	AMT	0.883707	7.64215e-20
ENSG00000240038.2	AMY2B	0.349646	0.0473955
ENSG00000174945.9	AMZ1	0.508248	7.96085e-08
ENSG00000196704.7	AMZ2	-0.232981	5.13423e-06
ENSG00000153107.7	ANAPC1	-0.406584	2.73607e-13
ENSG00000141552.13	ANAPC11	-0.297607	2.89742e-09
ENSG00000129055.8	ANAPC13	-0.659945	3.72743e-13
ENSG00000110200.4	ANAPC15	0.241371	0.00618788
ENSG00000166295.4	ANAPC16	-0.223403	0.000374688
ENSG00000176248.7	ANAPC2	0.68702	1.13273e-36
ENSG00000053900.6	ANAPC4	-0.160222	0.0401263
ENSG00000089053.8	ANAPC5	-0.100822	0.0434828
ENSG00000196510.8	ANAPC7	-0.209699	0.000126897
ENSG00000130812.6	ANGPTL6	0.986355	1.62891e-29
ENSG00000029534.15	ANK1	-0.789678	5.48872e-39
ENSG00000145362.12	ANK2	-0.468766	4.29606e-13
ENSG00000151687.10	ANKAR	0.333962	0.0472318
ENSG00000166839.12	ANKDD1A	0.373499	0.0137737
ENSG00000132623.11	ANKEF1	-1.28503	1.72923e-26
ENSG00000185722.12	ANKFY1	0.504972	6.71852e-25
ENSG00000131503.16	ANKHD1	-0.757647	0.00563559
ENSG00000176915.10	ANKLE2	0.346919	5.74143e-16
ENSG00000144504.11	ANKMY1	0.443501	3.51468e-15
ENSG00000106524.4	ANKMY2	-0.654749	4.3555e-10
ENSG00000164331.5	ANKRA2	0.538825	3.36699e-10
ENSG00000088448.10	ANKRD10	0.328845	3.99957e-14
ENSG00000167522.10	ANKRD11	0.27296	2.06141e-05
ENSG00000101745.11	ANKRD12	-0.323019	6.91006e-10
ENSG00000076513.12	ANKRD13A	-0.613537	3.93544e-34
ENSG00000118454.8	ANKRD13C	0.414583	6.0799e-16
ENSG00000172932.10	ANKRD13D	0.653254	7.18666e-41
ENSG00000134461.11	ANKRD16	0.35528	6.39373e-07
ENSG00000196774.3	ANKRD20A1	1.15	0.0438058
ENSG00000183148.5	ANKRD20A2	1.53814	2.75298e-05
ENSG00000132498.7	ANKRD20A3	1.77895	0.000988951
ENSG00000172014.11	ANKRD20A4	0.88399	0.00209416
ENSG00000089847.8	ANKRD24	0.954263	7.52571e-08
ENSG00000105186.10	ANKRD27	-0.567461	1.0791e-23
ENSG00000206560.6	ANKRD28	-0.621369	3.50857e-43
ENSG00000163046.11	ANKRD30BL	1.84317	1.72431e-08
ENSG00000145700.5	ANKRD31	-1.34545	0.00750166
ENSG00000164236.7	ANKRD33B	0.774553	4.40939e-17
ENSG00000181039.7	ANKRD34A	0.952674	1.55609e-18
ENSG00000135976.12	ANKRD36	0.894454	3.67486e-36
ENSG00000174501.10	ANKRD36C	1.05188	3.0173e-23
ENSG00000186352.4	ANKRD37	1.12135	5.48849e-59
ENSG00000213337.4	ANKRD39	0.41766	0.00408636
ENSG00000154945.6	ANKRD40	-0.84452	1.28399e-42
ENSG00000137494.9	ANKRD42	0.351945	0.000543767
ENSG00000168876.4	ANKRD49	-0.476964	5.18182e-07
ENSG00000151458.7	ANKRD50	0.331083	2.83283e-05
ENSG00000139645.9	ANKRD52	0.447003	2.66686e-20
ENSG00000144031.7	ANKRD53	1.17517	0.00241396
ENSG00000100124.8	ANKRD54	-0.164689	0.039093
ENSG00000135299.12	ANKRD6	0.760456	0.0182686
ENSG00000235098.4	ANKRD65	2.18197	0.0246177
ENSG00000106013.8	ANKRD7	-0.267304	0.0137037
ENSG00000156381.4	ANKRD9	-1.54663	0.0228637
ENSG00000064999.12	ANKS1A	-0.270885	1.15741e-05
ENSG00000185046.14	ANKS1B	-0.446056	0.000132637
ENSG00000168096.10	ANKS3	0.366523	4.93601e-07
ENSG00000165138.12	ANKS6	-0.359253	6.36266e-06
ENSG00000163516.9	ANKZF1	0.362763	3.96726e-16
ENSG00000011426.6	ANLN	-0.344388	6.5045e-09
ENSG00000177119.11	ANO6	-0.512456	9.20025e-22
ENSG00000074855.6	ANO8	1.1355	4.53457e-67
ENSG00000185101.8	ANO9	0.56296	1.17527e-22
ENSG00000140350.11	ANP32A	-0.391565	2.13255e-20
ENSG00000136938.8	ANP32B	0.43028	2.63806e-12
ENSG00000143401.10	ANP32E	-0.358293	2.56164e-12
ENSG00000198250.8	ANTXRL	1.64368	0.0227638
ENSG00000122359.13	ANXA11	0.337455	1.99954e-13
ENSG00000182718.12	ANXA2	-0.677181	3.39711e-13
ENSG00000177721.3	ANXA2R	0.75834	3.29469e-21
ENSG00000197043.9	ANXA6	-0.64416	6.35223e-09
ENSG00000138279.11	ANXA7	-0.459608	2.02115e-11
ENSG00000131480.4	AOC2	1.18783	3.49235e-23
ENSG00000131471.2	AOC3	0.233685	0.000875201
ENSG00000138356.9	AOX1	2.28439	0.0233931
ENSG00000218537.1	AP000350.4	1.14147	7.53734e-23
ENSG00000173727.7	AP000769.1	0.924301	3.71807e-27
ENSG00000268856.1	AP001579.1	1.25277	0.000697024
ENSG00000228120.2	AP001631.10	0.680508	0.000515059
ENSG00000254531.1	AP001816.1	0.595671	3.93249e-06
ENSG00000254614.1	AP003068.23	0.631702	0.000151485
ENSG00000187066.4	AP003068.6	1.18502	1.4035e-06
ENSG00000269089.1	AP003733.1	1.72963	3.98538e-22
ENSG00000255284.1	AP006621.5	0.587995	1.27298e-18
ENSG00000138660.7	AP1AR	-0.360666	7.27213e-12
ENSG00000166747.8	AP1G1	-0.496077	2.6284e-17
ENSG00000213983.7	AP1G2	0.605121	1.05504e-29
ENSG00000072958.4	AP1M1	-0.334971	4.36765e-05
ENSG00000106367.9	AP1S1	-0.205547	0.000481413
ENSG00000182287.9	AP1S2	-0.293691	8.89259e-06
ENSG00000152056.12	AP1S3	-0.815354	2.74875e-05
ENSG00000042753.7	AP2S1	-0.238755	7.66318e-06
ENSG00000132842.9	AP3B1	-0.239255	4.63141e-05
ENSG00000103723.8	AP3B2	1.16057	4.7824e-10
ENSG00000070718.7	AP3M2	-0.712214	6.60776e-17
ENSG00000157823.12	AP3S2	-0.410835	3.14809e-05
ENSG00000134262.8	AP4B1	0.175633	0.0426198
ENSG00000081014.6	AP4E1	-0.523069	1.68774e-22
ENSG00000221838.5	AP4M1	0.411785	4.61077e-08
ENSG00000100478.10	AP4S1	0.762133	1.7869e-24
ENSG00000254470.2	AP5B1	0.446719	6.21613e-13
ENSG00000053770.7	AP5M1	-0.179079	0.0115141
ENSG00000242802.2	AP5Z1	0.395267	5.46813e-14
ENSG00000011132.7	APBA3	0.680215	3.34237e-28
ENSG00000166313.14	APBB1	-2.00838	3.41126e-60
ENSG00000077420.11	APBB1IP	0.148887	0.00100576
ENSG00000134982.12	APC	-1.02768	1.40352e-65
ENSG00000115266.7	APC2	0.926026	2.08202e-53
ENSG00000164062.8	APEH	0.136665	0.01449
ENSG00000169188.4	APEX2	-0.889111	4.51812e-27
ENSG00000117362.8	APH1A	-0.586814	1.03176e-31
ENSG00000166181.8	API5	-0.353461	3.879e-12
ENSG00000149089.8	APIP	-1.01785	5.23308e-26
ENSG00000169621.5	APLF	0.495293	1.65218e-09
ENSG00000101474.7	APMAP	-0.177693	0.00134506
ENSG00000163382.7	APOA1BP	-0.186137	0.00329573
ENSG00000158874.7	APOA2	2.66158	0.00399683
ENSG00000179750.11	APOBEC3B	-0.772062	3.46094e-07
ENSG00000244509.3	APOBEC3C	0.59275	1.94454e-09
ENSG00000243811.3	APOBEC3D	-0.261161	0.0282004
ENSG00000128394.12	APOBEC3F	0.607782	0.00907242
ENSG00000239713.3	APOBEC3G	-0.496743	6.26956e-14
ENSG00000184730.6	APOBR	0.908542	0.00255681
ENSG00000130203.5	APOE	1.39903	1.96162e-11
ENSG00000175336.8	APOF	0.646943	0.00175271
ENSG00000128335.9	APOL2	-0.431276	1.36179e-10
ENSG00000128284.15	APOL3	-0.554295	8.77228e-11
ENSG00000221963.5	APOL6	-0.253691	9.2511e-11
ENSG00000178878.8	APOLD1	0.563421	3.91079e-22
ENSG00000204444.6	APOM	0.67011	9.90684e-06
ENSG00000184831.9	APOO	-0.907203	6.03093e-07
ENSG00000155008.9	APOOL	0.483175	0.000883125
ENSG00000256053.3	APOPT1	-0.750488	3.93711e-17
ENSG00000142192.16	APP	0.612484	0.00198062
ENSG00000062725.5	APPBP2	-0.597375	1.50872e-20
ENSG00000157500.6	APPL1	-0.470081	3.35431e-14
ENSG00000136044.7	APPL2	0.242677	0.00013884
ENSG00000165272.10	AQP3	-0.196612	0.000366578
ENSG00000021776.6	AQR	-0.514863	2.1334e-14
ENSG00000078061.8	ARAF	-0.356854	7.77108e-09
ENSG00000186635.10	ARAP1	0.383882	4.36067e-20
ENSG00000047365.7	ARAP2	-0.155299	0.0107376
ENSG00000120318.11	ARAP3	1.50673	0.0114292
ENSG00000095139.9	ARCN1	-0.767667	5.63531e-43
ENSG00000119682.12	AREL1	-0.401229	3.29378e-09
ENSG00000134287.5	ARF3	-0.275126	3.23939e-05
ENSG00000004059.6	ARF5	-0.120194	0.0108131
ENSG00000242247.6	ARFGAP3	-0.14968	0.0381363
ENSG00000066777.4	ARFGEF1	-0.275862	1.69151e-09
ENSG00000164144.10	ARFIP1	-0.577547	1.6714e-14
ENSG00000132254.8	ARFIP2	-0.367012	6.99614e-09
ENSG00000101246.15	ARFRP1	0.122729	0.00371786
ENSG00000134884.9	ARGLU1	0.7507	4.05553e-57
ENSG00000198826.6	ARHGAP11A	-0.328159	1.30124e-11
ENSG00000187951.6	ARHGAP11B	0.626986	7.4519e-28
ENSG00000165322.13	ARHGAP12	-0.180687	0.0321929
ENSG00000140750.12	ARHGAP17	0.603373	6.0143e-06
ENSG00000146376.6	ARHGAP18	-3.05327	2.86186e-44
ENSG00000213390.6	ARHGAP19	-0.868572	3.15039e-44
ENSG00000128805.10	ARHGAP22	1.45069	0.00111335
ENSG00000225485.3	ARHGAP23	-0.640159	0.000255712
ENSG00000138639.13	ARHGAP24	-0.233771	0.00304865
ENSG00000145819.11	ARHGAP26	1.04128	5.83041e-81
ENSG00000159314.7	ARHGAP27	1.38658	1.45976e-126
ENSG00000186517.9	ARHGAP30	-0.388975	7.11269e-30
ENSG00000031081.6	ARHGAP31	-1.3651	0.000602038
ENSG00000004777.14	ARHGAP33	1.28324	9.37476e-116
ENSG00000160007.13	ARHGAP35	-0.647119	1.17335e-100
ENSG00000147799.7	ARHGAP39	1.06851	3.92277e-28
ENSG00000089820.11	ARHGAP4	0.691242	2.01936e-49
ENSG00000100852.8	ARHGAP5	-0.511456	4.93293e-11
ENSG00000123329.13	ARHGAP9	0.456042	1.25207e-18
ENSG00000141522.7	ARHGDIA	0.650583	4.02702e-30
ENSG00000111348.4	ARHGDIB	-0.0815596	0.0448907
ENSG00000076928.13	ARHGEF1	0.450367	2.33166e-38
ENSG00000110237.3	ARHGEF17	0.835272	0.0362639
ENSG00000104880.13	ARHGEF18	-0.811153	1.10442e-50
ENSG00000142632.12	ARHGEF19	0.312013	2.23394e-05
ENSG00000240771.2	ARHGEF25	1.24943	0.00203288
ENSG00000163947.7	ARHGEF3	-1.92441	1.27286e-39
ENSG00000183111.7	ARHGEF37	1.23947	0.000236194
ENSG00000137135.13	ARHGEF39	0.207969	0.00273857
ENSG00000165801.5	ARHGEF40	1.18255	0.00220453
ENSG00000129675.11	ARHGEF6	-0.109404	0.0362408
ENSG00000102606.13	ARHGEF7	-0.144841	0.00466604
ENSG00000131089.9	ARHGEF9	0.936615	8.9831e-85
ENSG00000117713.13	ARID1A	0.673373	1.34934e-26
ENSG00000049618.17	ARID1B	0.592007	3.4074e-18
ENSG00000189079.11	ARID2	-0.510697	1.11694e-24
ENSG00000116017.6	ARID3A	-0.232478	1.09295e-06
ENSG00000205143.2	ARID3C	0.758144	0.00568051
ENSG00000032219.14	ARID4A	-0.271936	9.62047e-05
ENSG00000196843.11	ARID5A	0.219477	0.000332566
ENSG00000150347.10	ARID5B	-0.740709	8.09349e-34
ENSG00000166233.8	ARIH1	-0.641597	2.04816e-28
ENSG00000177479.15	ARIH2	-0.4885	3.45007e-22
ENSG00000221883.2	ARIH2OS	1.64612	6.32757e-69
ENSG00000120805.9	ARL1	-0.600143	9.34817e-17
ENSG00000175414.6	ARL10	1.34166	4.06637e-10
ENSG00000152213.3	ARL11	0.408869	8.22199e-06
ENSG00000152219.4	ARL14EP	-0.935533	1.78896e-57
ENSG00000185305.6	ARL15	-0.406281	4.62996e-09
ENSG00000228696.4	ARL17B	1.20455	0.0112748
ENSG00000138175.8	ARL3	-0.574717	2.06024e-14
ENSG00000175906.4	ARL4D	2.66947	3.96593e-30
ENSG00000162980.12	ARL5A	0.125178	0.0140278
ENSG00000165997.4	ARL5B	-0.582918	8.95961e-21
ENSG00000113966.5	ARL6	-0.316799	0.0267396
ENSG00000170540.10	ARL6IP1	0.199556	0.00180999
ENSG00000182196.9	ARL6IP4	1.50883	2.26608e-17
ENSG00000144746.6	ARL6IP5	-0.723778	2.81038e-14
ENSG00000177917.6	ARL6IP6	-0.193384	6.51159e-08
ENSG00000143862.3	ARL8A	-0.222716	0.00891552
ENSG00000134108.8	ARL8B	-0.174827	0.00880137
ENSG00000196503.2	ARL9	-2.20775	4.12537e-08
ENSG00000104442.5	ARMC1	-0.552462	1.76732e-15
ENSG00000157343.4	ARMC12	0.879458	5.66541e-05
ENSG00000105676.9	ARMC6	-0.286218	2.14776e-09
ENSG00000125449.2	ARMC7	0.250172	0.00650202
ENSG00000102401.15	ARMCX3	-0.407654	3.13546e-10
ENSG00000029153.10	ARNTL2	-0.399781	4.97773e-05
ENSG00000241685.4	ARPC1A	-0.646603	3.53574e-48
ENSG00000130429.8	ARPC1B	-0.337401	1.06131e-19
ENSG00000111229.11	ARPC3	-0.425098	1.51001e-11
ENSG00000241553.8	ARPC4	-0.553119	3.26547e-24
ENSG00000136950.9	ARPC5L	-0.124485	0.00784153
ENSG00000128989.6	ARPP19	-0.135828	0.0066043
ENSG00000172995.12	ARPP21	1.05377	3.81909e-22
ENSG00000120500.13	ARR3	1.69828	5.08835e-10
ENSG00000141480.13	ARRB2	-0.367936	1.20064e-07
ENSG00000197070.9	ARRDC1	0.441672	3.62826e-20
ENSG00000105643.5	ARRDC2	0.32123	2.00954e-09
ENSG00000113369.4	ARRDC3	0.853615	9.04205e-26
ENSG00000100299.13	ARSA	0.735421	2.75653e-26
ENSG00000113273.11	ARSB	0.361798	1.9681e-06
ENSG00000141337.8	ARSG	0.681948	1.12039e-23
ENSG00000117407.12	ARTN	0.854635	0.0367796
ENSG00000173409.9	ARV1	-0.5961	2.61827e-09
ENSG00000099889.9	ARVCF	0.386203	1.01586e-05
ENSG00000104763.13	ASAH1	-0.435061	7.43982e-13
ENSG00000153317.10	ASAP1	0.458162	1.19998e-09
ENSG00000088280.14	ASAP3	1.94683	2.6077e-92
ENSG00000065802.7	ASB1	0.294795	1.70877e-09
ENSG00000196372.8	ASB13	-1.06867	7.96346e-67
ENSG00000161664.2	ASB16	0.821789	0.00158261
ENSG00000100628.7	ASB2	-0.310844	0.000147365
ENSG00000148331.7	ASB6	0.257545	0.000301964
ENSG00000183475.8	ASB7	-1.28737	2.735e-62
ENSG00000177981.6	ASB8	-0.720305	4.47024e-21
ENSG00000138303.13	ASCC1	-0.210568	0.000477302
ENSG00000112249.9	ASCC3	-0.486393	1.26751e-16
ENSG00000111875.7	ASF1A	-0.694768	8.09813e-27
ENSG00000105011.4	ASF1B	-0.38781	4.6598e-27
ENSG00000213199.3	ASIC3	1.2173	3.26344e-33
ENSG00000072182.8	ASIC4	2.05703	8.83898e-10
ENSG00000126522.12	ASL	1.1854	1.64496e-96
ENSG00000169093.10	ASMTL	0.288349	1.73995e-06
ENSG00000198356.7	ASNA1	-0.447122	1.54642e-09
ENSG00000070669.12	ASNS	-0.56558	4.36302e-64
ENSG00000138381.5	ASNSD1	-0.912629	1.45479e-38
ENSG00000204653.5	ASPDH	0.965777	1.5263e-05
ENSG00000128203.6	ASPHD2	-1.52375	1.77208e-102
ENSG00000066279.12	ASPM	-0.510733	2.61802e-36
ENSG00000106819.7	ASPN	0.973946	0.00637885
ENSG00000169696.11	ASPSCR1	0.438445	7.45576e-18
ENSG00000130707.13	ASS1	-1.06759	1.75463e-49
ENSG00000034533.7	ASTE1	-0.276244	0.0263792
ENSG00000188886.3	ASTL	1.68836	2.64922e-05
ENSG00000064102.10	ASUN	-1.062	4.875e-39
ENSG00000171456.12	ASXL1	-0.202146	8.32306e-07
ENSG00000143970.12	ASXL2	0.172443	0.000221606
ENSG00000154438.3	ASZ1	-2.88201	3.95603e-88
ENSG00000138138.9	ATAD1	-0.266659	0.000101959
ENSG00000156802.8	ATAD2	-0.720905	2.46459e-46
ENSG00000197785.9	ATAD3A	-0.217925	3.16784e-05
ENSG00000160072.15	ATAD3B	0.288621	4.34233e-09
ENSG00000215915.5	ATAD3C	1.20349	0.00636303
ENSG00000176208.4	ATAD5	-0.154966	0.011482
ENSG00000137343.13	ATAT1	0.871795	1.81847e-16
ENSG00000123268.4	ATF1	-0.376005	1.93932e-07
ENSG00000115966.12	ATF2	-0.303411	7.79493e-05
ENSG00000162772.12	ATF3	0.352165	8.01408e-09
ENSG00000128272.10	ATF4	-0.172142	2.60232e-08
ENSG00000169136.4	ATF5	0.370342	1.3554e-06
ENSG00000118217.5	ATF6	-0.247457	0.000183519
ENSG00000213676.6	ATF6B	0.314636	1.9403e-09
ENSG00000170653.14	ATF7	-0.529863	0.00201959
ENSG00000171681.8	ATF7IP	-0.191014	0.000837189
ENSG00000166669.9	ATF7IP2	1.22655	9.14127e-35
ENSG00000152348.11	ATG10	0.631885	2.79113e-11
ENSG00000145782.8	ATG12	-0.447304	7.44102e-08
ENSG00000175224.12	ATG13	-0.502731	1.02586e-18
ENSG00000126775.8	ATG14	0.430495	1.72735e-05
ENSG00000168010.6	ATG16L2	0.869758	2.96373e-74
ENSG00000110046.8	ATG2A	0.920784	2.01706e-74
ENSG00000066739.7	ATG2B	-0.460238	6.41789e-20
ENSG00000144848.6	ATG3	-0.842883	1.32241e-35
ENSG00000101844.13	ATG4A	-0.583641	1.20756e-05
ENSG00000125703.10	ATG4C	-0.551158	2.48186e-07
ENSG00000057663.8	ATG5	-0.772935	2.33917e-26
ENSG00000197548.8	ATG7	0.481982	8.65635e-08
ENSG00000198925.6	ATG9A	0.50387	5.70808e-36
ENSG00000142102.11	ATHL1	-0.368263	3.45061e-07
ENSG00000198513.7	ATL1	-0.545594	0.013385
ENSG00000119787.9	ATL2	-0.110597	0.0326826
ENSG00000184743.8	ATL3	-0.697006	5.92362e-19
ENSG00000149311.13	ATM	0.71258	4.37196e-37
ENSG00000166454.5	ATMIN	-0.468184	4.64271e-13
ENSG00000111676.10	ATN1	1.10913	4.67394e-27
ENSG00000179774.7	ATOH7	0.599232	0.0325497
ENSG00000145246.9	ATP10D	-0.38757	6.49954e-07
ENSG00000058063.11	ATP11B	-0.172262	7.36397e-05
ENSG00000101974.10	ATP11C	0.295079	1.1053e-11
ENSG00000105726.12	ATP13A1	0.774754	1.57695e-40
ENSG00000133657.10	ATP13A3	-0.359779	4.09657e-13
ENSG00000163399.11	ATP1A1	0.130664	0.0260384
ENSG00000105409.11	ATP1A3	0.256209	4.05893e-05
ENSG00000143153.8	ATP1B1	1.07946	1.57535e-26
ENSG00000069849.6	ATP1B3	-0.187768	9.6519e-05
ENSG00000196296.9	ATP2A1	0.844197	1.33433e-12
ENSG00000174437.12	ATP2A2	0.395956	6.39147e-18
ENSG00000074370.13	ATP2A3	0.553885	6.32276e-26
ENSG00000070961.10	ATP2B1	-0.282169	2.00044e-11
ENSG00000157087.12	ATP2B2	2.45666	0.0402087
ENSG00000067842.13	ATP2B3	3.33293	0.00301529
ENSG00000058668.10	ATP2B4	-0.561028	2.35871e-05
ENSG00000017260.15	ATP2C1	-0.311735	2.8227e-09
ENSG00000105675.4	ATP4A	2.91743	4.18564e-16
ENSG00000152234.11	ATP5A1	-0.583876	4.14312e-30
ENSG00000110955.4	ATP5B	-0.382172	6.35215e-18
ENSG00000165629.15	ATP5C1	-0.397457	1.23334e-10
ENSG00000099624.3	ATP5D	0.69418	1.88802e-25
ENSG00000124172.5	ATP5E	-0.165689	0.0173453
ENSG00000116459.6	ATP5F1	-0.615918	5.38776e-27
ENSG00000159199.9	ATP5G1	-0.413887	2.20835e-12
ENSG00000135390.13	ATP5G2	-0.375023	1.71781e-14
ENSG00000154518.5	ATP5G3	-0.303897	2.14666e-13
ENSG00000167863.7	ATP5H	-0.52833	3.86969e-14
ENSG00000154723.8	ATP5J	-0.270083	3.35308e-05
ENSG00000241468.3	ATP5J2	-0.308914	4.60393e-09
ENSG00000241837.2	ATP5O	-0.389937	4.81986e-09
ENSG00000105341.14	ATP5SL	-0.483522	2.82687e-14
ENSG00000182220.9	ATP6AP2	-0.517548	2.27343e-09
ENSG00000033627.10	ATP6V0A1	0.358321	0.000136507
ENSG00000185344.9	ATP6V0A2	-0.414143	1.29144e-17
ENSG00000117410.9	ATP6V0B	-0.415808	4.93819e-19
ENSG00000185883.6	ATP6V0C	1.68971	1.26553e-14
ENSG00000159720.7	ATP6V0D1	-0.28507	0.0101457
ENSG00000113732.4	ATP6V0E1	-0.388336	1.51487e-10
ENSG00000171130.13	ATP6V0E2	-0.313253	7.88819e-08
ENSG00000114573.5	ATP6V1A	-0.830928	8.8133e-19
ENSG00000147416.6	ATP6V1B2	-0.205288	0.000119025
ENSG00000155097.7	ATP6V1C1	-0.559068	3.14131e-16
ENSG00000143882.5	ATP6V1C2	-0.984141	0.00839035
ENSG00000131100.8	ATP6V1E1	-0.396223	8.99605e-09
ENSG00000250565.2	ATP6V1E2	0.230164	0.0134918
ENSG00000128524.4	ATP6V1F	-0.258906	2.78658e-05
ENSG00000136888.6	ATP6V1G1	-0.22783	2.28078e-05
ENSG00000165240.13	ATP7A	-0.537102	1.14639e-07
ENSG00000081923.6	ATP8B1	0.616695	0.00022131
ENSG00000130270.12	ATP8B3	0.478351	0.00093298
ENSG00000166377.15	ATP9B	0.529418	3.81496e-14
ENSG00000175054.10	ATR	-0.17377	0.0151333
ENSG00000138085.12	ATRAID	-0.65821	4.42039e-18
ENSG00000164053.13	ATRIP	1.0706	3.03872e-39
ENSG00000107518.12	ATRNL1	0.224687	0.000139464
ENSG00000130638.11	ATXN10	-0.0927363	0.0320344
ENSG00000224470.3	ATXN1L	-0.454923	2.72559e-14
ENSG00000204842.10	ATXN2	0.854846	9.80322e-30
ENSG00000168488.14	ATXN2L	0.691035	3.65839e-32
ENSG00000163635.13	ATXN7	0.553073	9.01618e-17
ENSG00000162650.11	ATXN7L2	0.393216	0.00327523
ENSG00000087152.11	ATXN7L3	-0.186063	1.31882e-05
ENSG00000148090.7	AUH	0.608606	6.17008e-22
ENSG00000127423.6	AUNIP	-0.396375	0.000246817
ENSG00000087586.13	AURKA	-1.28287	2.46671e-102
ENSG00000175756.9	AURKAIP1	0.182963	0.000112251
ENSG00000178999.8	AURKB	-0.201915	5.15812e-06
ENSG00000158321.11	AUTS2	0.920894	1.04538e-92
ENSG00000169857.3	AVEN	0.274146	0.0118734
ENSG00000135407.6	AVIL	0.966514	4.73248e-21
ENSG00000105778.13	AVL9	-0.468402	3.31057e-25
ENSG00000119986.6	AVPI1	0.877745	7.86608e-08
ENSG00000126895.9	AVPR2	0.851685	3.15408e-06
ENSG00000162779.16	AXDND1	0.891926	0.00465669
ENSG00000103126.10	AXIN1	-0.55519	8.16791e-22
ENSG00000167601.7	AXL	1.7071	9.71772e-09
ENSG00000141577.9	AZI1	0.451882	2.0003e-11
ENSG00000155096.9	AZIN1	-0.594929	1.66788e-27
ENSG00000166710.13	B2M	-0.169199	0.0101893
ENSG00000162885.8	B3GALNT2	0.265406	8.37236e-05
ENSG00000235863.2	B3GALT4	0.437914	4.72916e-07
ENSG00000176022.3	B3GALT6	0.181623	0.0359513
ENSG00000112309.6	B3GAT2	-1.73569	0.0467668
ENSG00000149541.5	B3GAT3	-0.353363	2.93319e-11
ENSG00000174684.6	B3GNT1	-0.657525	2.15733e-13
ENSG00000170340.10	B3GNT2	-1.05975	3.02797e-25
ENSG00000156966.6	B3GNT7	1.21842	8.94302e-11
ENSG00000237172.3	B3GNT9	0.573671	0.00107176
ENSG00000175711.4	B3GNTL1	0.497403	4.41096e-12
ENSG00000135454.9	B4GALNT1	0.412827	3.08834e-05
ENSG00000086062.8	B4GALT1	-0.38363	4.7377e-13
ENSG00000117411.12	B4GALT2	-0.214538	0.00633265
ENSG00000158850.10	B4GALT3	-0.899185	1.92384e-91
ENSG00000121578.8	B4GALT4	0.240701	0.0136983
ENSG00000158470.5	B4GALT5	-1.5072	9.89853e-30
ENSG00000118276.7	B4GALT6	-0.653465	0.00400313
ENSG00000027847.9	B4GALT7	0.212817	0.0001709
ENSG00000123810.3	B9D2	0.622844	5.41773e-05
ENSG00000105393.11	BABAM1	-0.362029	3.54091e-07
ENSG00000156273.11	BACH1	-0.391164	2.53094e-10
ENSG00000112182.10	BACH2	-0.105323	0.00292168
ENSG00000107262.12	BAG1	-0.148644	0.0148168
ENSG00000151929.5	BAG3	1.41749	2.63994e-13
ENSG00000156735.6	BAG4	-0.706291	1.22331e-23
ENSG00000166170.9	BAG5	-0.626436	4.92328e-40
ENSG00000204463.8	BAG6	0.109142	0.0261595
ENSG00000140320.7	BAHD1	-0.728938	1.37315e-18
ENSG00000181790.6	BAI1	0.460377	0.00260688
ENSG00000175866.11	BAIAP2	1.2437	3.61757e-43
ENSG00000006453.9	BAIAP2L1	0.556654	0.000535686
ENSG00000128298.12	BAIAP2L2	1.45739	2.92585e-06
ENSG00000007516.9	BAIAP3	1.78178	2.95934e-79
ENSG00000030110.8	BAK1	-0.827998	1.10735e-34
ENSG00000095739.7	BAMBI	1.83157	4.7481e-10
ENSG00000175334.3	BANF1	-0.39642	3.28954e-09
ENSG00000172530.15	BANP	0.327158	8.94743e-14
ENSG00000163930.5	BAP1	-0.205434	3.53154e-06
ENSG00000138376.6	BARD1	-0.755091	2.64544e-45
ENSG00000176788.7	BASP1	0.375937	7.79213e-07
ENSG00000087088.15	BAX	-0.180707	0.00437345
ENSG00000198604.6	BAZ1A	-0.932784	8.66043e-47
ENSG00000009954.6	BAZ1B	-0.937307	1.09979e-126
ENSG00000076108.7	BAZ2A	0.730195	7.37547e-37
ENSG00000105327.11	BBC3	0.470887	4.33381e-18
ENSG00000181004.5	BBS12	-1.22247	3.07269e-07
ENSG00000125124.7	BBS2	-0.385649	1.25243e-07
ENSG00000140463.9	BBS4	-0.327748	2.79702e-06
ENSG00000138686.5	BBS7	-0.26938	0.000597209
ENSG00000122507.16	BBS9	0.330372	0.000416332
ENSG00000114439.14	BBX	-0.254894	9.5972e-07
ENSG00000185825.11	BCAP31	-0.362863	3.1535e-11
ENSG00000050820.12	BCAR1	0.264279	0.0329031
ENSG00000137936.12	BCAR3	1.00455	1.83542e-31
ENSG00000116752.5	BCAS2	-0.325604	2.89216e-05
ENSG00000141376.16	BCAS3	0.490702	7.01733e-10
ENSG00000124243.13	BCAS4	-0.107701	0.00759782
ENSG00000060982.10	BCAT1	-0.714959	1.9917e-48
ENSG00000107949.12	BCCIP	-0.34344	2.0411e-10
ENSG00000248098.6	BCKDHA	1.60302	1.05621e-17
ENSG00000103507.9	BCKDK	0.666636	1.91813e-23
ENSG00000119866.16	BCL11A	-0.704054	5.55671e-39
ENSG00000171791.10	BCL2	-2.33887	0.0036291
ENSG00000171552.8	BCL2L1	-0.343148	2.11436e-16
ENSG00000153094.17	BCL2L11	0.77047	5.05196e-41
ENSG00000126453.5	BCL2L12	0.874744	9.86095e-21
ENSG00000099968.13	BCL2L13	-0.140554	0.013678
ENSG00000129473.5	BCL2L2	-0.370328	0.00214327
ENSG00000069399.8	BCL3	0.86319	1.98954e-14
ENSG00000113916.13	BCL6	-0.335325	4.62456e-11
ENSG00000106635.3	BCL7B	-0.643816	4.54101e-27
ENSG00000099385.7	BCL7C	0.328353	0.00243694
ENSG00000116128.5	BCL9	-0.350574	0.00171943
ENSG00000029363.11	BCLAF1	-0.398211	2.40699e-12
ENSG00000183337.12	BCOR	-0.48996	2.36575e-15
ENSG00000074582.8	BCS1L	-0.299611	2.12742e-06
ENSG00000164039.10	BDH2	-0.466237	0.00145526
ENSG00000126581.8	BECN1	0.119631	0.0399558
ENSG00000188848.11	BEND4	-0.104212	0.0214957
ENSG00000167995.11	BEST1	1.19229	1.01943e-47
ENSG00000127325.14	BEST3	-0.500061	3.33194e-27
ENSG00000142959.4	BEST4	1.4376	8.45924e-21
ENSG00000105829.7	BET1	-0.426298	4.65512e-08
ENSG00000177951.13	BET1L	0.137842	0.0198029
ENSG00000103429.6	BFAR	-0.812228	2.27159e-46
ENSG00000170819.4	BFSP2	0.391747	0.01784
ENSG00000242252.1	BGLAP	1.02021	0.021108
ENSG00000205899.3	BHLHA9	2.42644	0.0105016
ENSG00000198908.7	BHLHB9	-4.16036	3.43453e-12
ENSG00000151746.9	BICD1	0.878344	4.64447e-60
ENSG00000015475.14	BID	-0.2759	5.59802e-05
ENSG00000110934.6	BIN2	-0.454271	2.36674e-08
ENSG00000147439.7	BIN3	0.272754	0.000420214
ENSG00000110330.4	BIRC2	-0.517048	9.64393e-15
ENSG00000023445.9	BIRC3	-0.676738	1.32916e-30
ENSG00000089685.10	BIRC5	-0.623178	4.9187e-32
ENSG00000115760.9	BIRC6	-0.31147	4.54423e-18
ENSG00000166619.8	BLCAP	0.19024	1.28408e-05
ENSG00000136573.8	BLK	0.314565	1.21495e-25
ENSG00000197299.6	BLM	-1.01943	2.89561e-57
ENSG00000108578.10	BLMH	-0.313897	1.04627e-09
ENSG00000095585.12	BLNK	-0.125672	0.0314162
ENSG00000135441.3	BLOC1S1	-0.203093	0.0244081
ENSG00000196072.7	BLOC1S2	-0.559955	1.93013e-17
ENSG00000189114.6	BLOC1S3	0.557174	2.97272e-11
ENSG00000186222.3	BLOC1S4	0.551865	0.000798752
ENSG00000188428.12	BLOC1S5	-0.897307	6.03265e-28
ENSG00000090013.5	BLVRB	-0.275053	1.21226e-06
ENSG00000117475.9	BLZF1	-0.579538	4.30948e-11
ENSG00000104081.9	BMF	-0.667728	9.16331e-34
ENSG00000168283.9	BMI1	-0.227389	0.00197258
ENSG00000152785.6	BMP3	-0.322105	1.45495e-12
ENSG00000153162.8	BMP6	0.729511	4.25586e-19
ENSG00000101144.8	BMP7	-0.306834	2.21147e-12
ENSG00000183682.7	BMP8A	0.800256	0.0168937
ENSG00000116985.6	BMP8B	0.6878	0.000310115
ENSG00000138696.6	BMPR1B	-1.76156	0.0145886
ENSG00000165733.7	BMS1	-0.662723	2.06856e-25
ENSG00000113734.13	BNIP1	-1.5417	1.3318e-26
ENSG00000140299.7	BNIP2	-0.793683	4.87386e-48
ENSG00000104765.10	BNIP3L	-0.198677	0.00658962
ENSG00000163141.14	BNIPL	1.37968	2.34655e-17
ENSG00000145919.6	BOD1	-0.638575	3.79289e-22
ENSG00000038219.8	BOD1L1	-0.0879145	0.0400825
ENSG00000169627.7	BOLA2B	6.27305	0.000186072
ENSG00000163170.7	BOLA3	-0.392236	6.47092e-06
ENSG00000170727.7	BOP1	0.407611	4.55237e-05
ENSG00000136122.11	BORA	-0.835373	2.16917e-32
ENSG00000137274.8	BPHL	0.609017	5.09789e-12
ENSG00000162813.13	BPNT1	-0.567208	5.32933e-20
ENSG00000171634.12	BPTF	0.384177	3.59581e-21
ENSG00000157764.8	BRAF	0.073978	0.0471827
ENSG00000089234.11	BRAP	-0.686713	3.88054e-19
ENSG00000012048.15	BRCA1	-0.83538	8.81885e-62
ENSG00000139618.10	BRCA2	-1.08896	1.23984e-40
ENSG00000204256.8	BRD2	-0.100739	0.00872652
ENSG00000169925.12	BRD3	0.368289	6.38384e-08
ENSG00000141867.13	BRD4	0.997986	1.07599e-94
ENSG00000166164.11	BRD7	-0.532812	2.89411e-29
ENSG00000112983.13	BRD8	0.118115	0.0326114
ENSG00000028310.13	BRD9	0.5679	3.36165e-30
ENSG00000185024.11	BRF1	-0.216232	7.80691e-05
ENSG00000104221.8	BRF2	0.27037	0.0034426
ENSG00000164713.5	BRI3	0.44585	0.00212155
ENSG00000184992.10	BRI3BP	-0.5015	3.69576e-21
ENSG00000182685.3	BRICD5	0.383667	2.72858e-05
ENSG00000136492.4	BRIP1	-0.588483	1.16651e-23
ENSG00000113460.8	BRIX1	-1.20515	3.10991e-22
ENSG00000254999.2	BRK1	-0.136938	0.0268917
ENSG00000162819.7	BROX	-0.353607	3.73806e-08
ENSG00000156983.11	BRPF1	-0.320799	2.61206e-11
ENSG00000096070.15	BRPF3	0.695431	1.20462e-32
ENSG00000160469.12	BRSK1	0.506926	2.3479e-21
ENSG00000174672.11	BRSK2	0.783438	0.0236656
ENSG00000168000.10	BSCL2	0.655821	6.25443e-07
ENSG00000160058.14	BSDC1	0.66543	8.87385e-41
ENSG00000172270.14	BSG	-0.103782	0.018793
ENSG00000119411.10	BSPRY	-0.721202	7.00129e-15
ENSG00000130303.8	BST2	-0.171102	0.00705822
ENSG00000095564.9	BTAF1	0.422924	1.17523e-18
ENSG00000064726.5	BTBD1	-0.262519	4.76016e-07
ENSG00000148925.6	BTBD10	-0.973404	1.23161e-28
ENSG00000138152.7	BTBD16	3.8258	0.0364507
ENSG00000233436.3	BTBD18	2.59672	2.02854e-35
ENSG00000222009.4	BTBD19	1.82211	4.02547e-24
ENSG00000133243.4	BTBD2	0.344773	6.51196e-13
ENSG00000189195.5	BTBD8	0.861375	8.66953e-13
ENSG00000183826.12	BTBD9	0.390533	0.000849954
ENSG00000169814.8	BTD	0.513018	0.00480053
ENSG00000134717.13	BTF3L4	-0.591188	1.4168e-20
ENSG00000133639.3	BTG1	0.308983	7.12407e-13
ENSG00000010671.11	BTK	-0.370552	4.98176e-09
ENSG00000112763.11	BTN2A1	-0.400793	1.28096e-08
ENSG00000124508.12	BTN2A2	-0.126906	0.0372086
ENSG00000026950.12	BTN3A1	-0.512083	1.42205e-18
ENSG00000186470.9	BTN3A2	-0.415561	9.37208e-16
ENSG00000111801.11	BTN3A3	-0.581322	3.01731e-12
ENSG00000166167.13	BTRC	-0.573075	1.14081e-12
ENSG00000169679.10	BUB1	-0.577803	3.95012e-32
ENSG00000156970.8	BUB1B	-0.345833	7.13441e-14
ENSG00000154473.13	BUB3	-0.317728	9.0847e-14
ENSG00000137656.7	BUD13	-1.19467	5.91774e-64
ENSG00000112578.5	BYSL	-0.955769	2.56522e-39
ENSG00000005379.11	BZRAP1	1.73419	2.25917e-100
ENSG00000082153.13	BZW1	-0.368327	1.92469e-11
ENSG00000136261.10	BZW2	-0.5672	2.64717e-18
ENSG00000165813.12	C10orf118	-0.474134	4.63978e-08
ENSG00000155640.5	C10orf12	-0.356011	1.17784e-08
ENSG00000173088.8	C10orf131	1.4189	0.00017638
ENSG00000107938.13	C10orf137	-0.366465	1.92118e-11
ENSG00000107815.3	C10orf2	-0.529916	2.59928e-12
ENSG00000120029.8	C10orf76	0.407911	2.6077e-08
ENSG00000120055.5	C10orf95	0.729424	0.000265325
ENSG00000137720.3	C11orf1	-0.343808	0.0106883
ENSG00000171067.6	C11orf24	-0.490362	7.58537e-24
ENSG00000158636.12	C11orf30	0.154167	0.0323697
ENSG00000211450.5	C11orf31	0.46632	4.35497e-16
ENSG00000185522.4	C11orf35	0.862033	1.0892e-22
ENSG00000149179.9	C11orf49	0.317689	4.42821e-05
ENSG00000182919.10	C11orf54	-0.15466	0.0495422
ENSG00000150776.13	C11orf57	-0.446055	9.5416e-11
ENSG00000175573.6	C11orf68	0.273729	1.56333e-05
ENSG00000184224.3	C11orf72	1.28511	0.0192349
ENSG00000149196.11	C11orf73	-0.595726	1.78951e-12
ENSG00000173715.11	C11orf80	0.479002	1.69122e-17
ENSG00000165490.8	C11orf82	-1.24056	5.41666e-40
ENSG00000204922.4	C11orf83	0.307208	1.31046e-05
ENSG00000184682.5	C11orf89	-1.52206	0.00687034
ENSG00000139637.9	C12orf10	-0.457122	3.04775e-11
ENSG00000151135.5	C12orf23	-0.430949	6.8356e-14
ENSG00000133641.13	C12orf29	-0.381952	1.73401e-06
ENSG00000047621.7	C12orf4	-0.809873	1.20442e-12
ENSG00000157895.7	C12orf43	-0.238782	0.00869413
ENSG00000123395.10	C12orf44	-0.259126	0.00091736
ENSG00000111412.4	C12orf49	-0.332588	1.67198e-12
ENSG00000078237.4	C12orf5	-0.337102	0.00153091
ENSG00000221949.2	C12orf61	1.55472	4.16816e-72
ENSG00000130921.3	C12orf65	0.240849	0.000118867
ENSG00000204954.5	C12orf73	0.356247	2.00572e-05
ENSG00000235162.4	C12orf75	-0.190057	0.00152537
ENSG00000174456.9	C12orf76	-0.285812	0.000585541
ENSG00000226397.3	C12orf77	-0.419976	5.32312e-05
ENSG00000133935.6	C14orf1	-0.549013	7.48059e-08
ENSG00000179933.4	C14orf119	-0.214692	0.0105454
ENSG00000170270.4	C14orf142	-0.598779	2.85048e-17
ENSG00000133943.16	C14orf159	0.604056	7.15489e-21
ENSG00000087302.4	C14orf166	-0.464244	2.6651e-12
ENSG00000214900.4	C14orf182	0.565868	0.0408909
ENSG00000156411.5	C14orf2	-0.420505	3.02708e-10
ENSG00000179476.3	C14orf28	1.04396	5.19772e-24
ENSG00000140104.9	C14orf79	1.07515	1.35479e-08
ENSG00000185347.13	C14orf80	0.482213	4.42864e-21
ENSG00000259642.1	C15orf37	1.67781	4.80607e-26
ENSG00000167173.14	C15orf39	0.848328	5.72845e-24
ENSG00000169609.9	C15orf40	0.381417	1.7739e-10
ENSG00000188549.8	C15orf52	0.884182	0.0334067
ENSG00000128891.11	C15orf57	0.749171	4.00534e-18
ENSG00000188277.8	C15orf62	0.771527	1.97962e-17
ENSG00000261652.2	C15orf65	-0.997438	1.45285e-05
ENSG00000185716.7	C16orf52	-0.321383	0.00444989
ENSG00000185905.3	C16orf54	-1.15978	2.1539e-12
ENSG00000140688.12	C16orf58	0.143704	0.0139509
ENSG00000162062.10	C16orf59	0.116862	0.0342231
ENSG00000103544.10	C16orf62	-0.321012	2.24388e-06
ENSG00000125149.7	C16orf70	0.320755	0.00161695
ENSG00000154102.6	C16orf74	-0.777868	6.34706e-26
ENSG00000070761.3	C16orf80	-0.282474	7.74599e-07
ENSG00000155330.5	C16orf87	-0.172807	0.0152599
ENSG00000196118.7	C16orf93	0.360573	4.16874e-07
ENSG00000260456.2	C16orf95	0.450383	0.000310453
ENSG00000154035.6	C17orf103	1.38742	9.43846e-12
ENSG00000180336.13	C17orf104	1.13177	9.49747e-11
ENSG00000258315.1	C17orf49	1.46093	3.44413e-10
ENSG00000154768.4	C17orf50	0.903988	6.17511e-06
ENSG00000212719.6	C17orf51	-0.315191	1.50017e-05
ENSG00000186665.8	C17orf58	-0.263376	0.0212719
ENSG00000196544.6	C17orf59	0.711667	4.73378e-27
ENSG00000178927.12	C17orf62	0.247821	3.62155e-12
ENSG00000141371.8	C17orf64	0.926798	0.0126854
ENSG00000214226.4	C17orf67	0.870431	3.38459e-19
ENSG00000185504.12	C17orf70	0.74268	1.66624e-40
ENSG00000224383.3	C17orf72	-0.628172	9.14101e-06
ENSG00000184560.3	C17orf74	3.84775	0.0243749
ENSG00000108666.5	C17orf75	-0.472776	1.33878e-10
ENSG00000141219.11	C17orf80	-0.588833	1.77355e-17
ENSG00000224877.3	C17orf89	0.26647	0.000214613
ENSG00000179294.5	C17orf96	0.804867	1.15022e-43
ENSG00000214556.4	C17orf98	3.00569	0.00745278
ENSG00000152242.6	C18orf25	0.317404	3.67753e-11
ENSG00000177576.6	C18orf32	1.03061	2.16466e-13
ENSG00000166845.9	C18orf54	-0.207178	0.00240087
ENSG00000176912.3	C18orf56	0.403827	0.000160787
ENSG00000141452.5	C18orf8	-0.340703	3.45164e-07
ENSG00000074842.3	C19orf10	-0.599541	2.78675e-45
ENSG00000131943.13	C19orf12	-0.357004	8.52673e-07
ENSG00000228300.9	C19orf24	0.564921	4.91491e-14
ENSG00000119559.11	C19orf25	0.442013	6.31113e-17
ENSG00000099625.8	C19orf26	1.73226	5.03517e-06
ENSG00000188305.4	C19orf35	2.65174	5.26479e-77
ENSG00000131944.5	C19orf40	-1.04513	2.8553e-13
ENSG00000123144.6	C19orf43	-0.110122	0.00896216
ENSG00000198723.6	C19orf45	-3.18457	0.0431295
ENSG00000160392.9	C19orf47	0.286128	1.5263e-05
ENSG00000167747.9	C19orf48	-0.569285	1.26259e-72
ENSG00000142444.6	C19orf52	0.451113	2.12497e-14
ENSG00000104979.4	C19orf53	-0.114472	0.0272348
ENSG00000188493.10	C19orf54	0.917442	3.13732e-23
ENSG00000167595.10	C19orf55	0.999194	5.45385e-35
ENSG00000006015.13	C19orf60	0.291305	2.12801e-09
ENSG00000130813.13	C19orf66	0.69921	2.76315e-21
ENSG00000188032.5	C19orf67	1.36768	5.16666e-14
ENSG00000185453.8	C19orf68	0.646546	2.49919e-12
ENSG00000174917.4	C19orf70	-0.175016	0.027788
ENSG00000183397.5	C19orf71	0.459793	0.00107176
ENSG00000221916.2	C19orf73	1.1216	4.37593e-14
ENSG00000267106.1	C19orf82	0.310624	0.0269424
ENSG00000197223.7	C1D	-0.31441	0.00011479
ENSG00000106392.6	C1GALT1	-0.162795	0.0327658
ENSG00000171155.7	C1GALT1C1	-0.359089	0.00900921
ENSG00000179397.13	C1orf101	0.874142	0.000222852
ENSG00000116922.10	C1orf109	-0.436657	1.48757e-11
ENSG00000000460.12	C1orf112	0.349334	8.24473e-07
ENSG00000197982.12	C1orf122	0.366583	2.61726e-08
ENSG00000162384.9	C1orf123	-0.170099	0.0152345
ENSG00000143633.8	C1orf131	-0.412122	7.49755e-07
ENSG00000204377.3	C1orf134	-1.79213	3.24511e-11
ENSG00000143110.7	C1orf162	-0.702449	0.039777
ENSG00000175707.7	C1orf172	-1.565	4.33473e-07
ENSG00000198912.6	C1orf174	-0.504256	6.44265e-11
ENSG00000163263.6	C1orf189	2.96172	0.000399761
ENSG00000179902.8	C1orf194	1.44067	0.0148928
ENSG00000179840.5	C1orf200	1.4638	2.70367e-14
ENSG00000249087.3	C1orf213	0.401608	5.31856e-06
ENSG00000142609.13	C1orf222	1.53132	0.0371226
ENSG00000198520.6	C1orf228	1.24044	3.71031e-22
ENSG00000157181.10	C1orf27	-0.225915	0.0168176
ENSG00000143793.8	C1orf35	0.145318	0.00502017
ENSG00000143612.14	C1orf43	-0.428313	2.74573e-22
ENSG00000164008.9	C1orf50	0.722829	9.32728e-19
ENSG00000162642.9	C1orf52	-0.21389	0.00035513
ENSG00000203724.6	C1orf53	0.734982	0.000239025
ENSG00000125462.12	C1orf61	0.490262	0.0235372
ENSG00000117616.13	C1orf63	1.30173	9.00043e-152
ENSG00000162585.12	C1orf86	0.484063	3.19708e-14
ENSG00000108561.4	C1QBP	-0.50344	5.73047e-18
ENSG00000165985.8	C1QL3	-1.45746	7.51202e-08
ENSG00000186897.3	C1QL4	2.52575	6.9427e-13
ENSG00000172247.3	C1QTNF4	2.37113	1.2929e-06
ENSG00000133466.9	C1QTNF6	0.343656	0.0104034
ENSG00000166278.10	C2	1.2142	3.4769e-10
ENSG00000149609.5	C20orf144	1.03777	3.02769e-21
ENSG00000088854.11	C20orf194	0.842801	4.0694e-06
ENSG00000125531.5	C20orf195	1.18197	2.49936e-14
ENSG00000101220.13	C20orf27	-0.225003	1.8031e-06
ENSG00000196476.7	C20orf96	0.655778	5.57806e-10
ENSG00000256073.2	C21orf119	1.12837	5.60735e-25
ENSG00000160226.11	C21orf2	0.630154	4.20642e-14
ENSG00000205930.4	C21orf49	0.636404	9.7816e-05
ENSG00000160298.13	C21orf58	0.80456	3.08345e-67
ENSG00000159079.14	C21orf59	-0.187163	0.026543
ENSG00000183250.7	C21orf67	0.640673	0.00540906
ENSG00000169314.10	C22orf15	1.61924	1.71724e-18
ENSG00000128346.6	C22orf23	-0.344629	0.0336173
ENSG00000128254.9	C22orf24	1.15873	5.14202e-06
ENSG00000182257.5	C22orf26	1.10887	9.28778e-08
ENSG00000215012.4	C22orf29	0.447265	6.70561e-09
ENSG00000188511.8	C22orf34	1.31528	1.29048e-102
ENSG00000242259.4	C22orf39	-0.509454	1.56747e-15
ENSG00000157617.12	C2CD2	0.357601	8.78341e-07
ENSG00000168014.12	C2CD3	0.411146	5.64166e-14
ENSG00000273045.1	C2ORF15	-1.12825	1.53521e-11
ENSG00000221843.2	C2orf16	1.1812	6.64748e-11
ENSG00000115998.3	C2orf42	0.428773	4.74201e-09
ENSG00000118961.10	C2orf43	-0.502264	5.82882e-08
ENSG00000163026.7	C2orf44	-0.981389	9.67539e-34
ENSG00000162972.6	C2orf47	-0.29135	0.0106054
ENSG00000163009.4	C2orf48	0.933742	8.6365e-28
ENSG00000186143.6	C2orf53	1.76073	0.00281531
ENSG00000239605.4	C2orf61	1.09062	0.0387135
ENSG00000158428.3	C2orf62	3.59121	4.13275e-06
ENSG00000178074.5	C2orf69	-0.196051	0.0343994
ENSG00000159239.7	C2orf81	0.561638	1.5583e-06
ENSG00000187699.6	C2orf88	-0.627088	2.43649e-21
ENSG00000163608.10	C3orf17	-0.82343	7.60083e-16
ENSG00000131379.5	C3orf20	1.07596	3.86694e-54
ENSG00000114529.8	C3orf52	-0.381184	1.02705e-09
ENSG00000181744.4	C3orf58	0.702785	9.57867e-60
ENSG00000188315.3	C3orf62	-0.796377	2.33463e-13
ENSG00000138658.11	C4orf21	-0.222499	0.00521002
ENSG00000197826.7	C4orf22	0.394163	0.019793
ENSG00000056050.6	C4orf27	-0.662448	3.50028e-08
ENSG00000164074.10	C4orf29	-0.17128	0.0255215
ENSG00000164096.10	C4orf3	0.378201	3.83698e-09
ENSG00000174749.5	C4orf32	0.548668	1.34521e-05
ENSG00000151470.8	C4orf33	-0.565054	1.46414e-09
ENSG00000163633.6	C4orf36	0.49935	4.12788e-07
ENSG00000205208.4	C4orf46	-0.405414	3.19637e-14
ENSG00000205129.4	C4orf47	1.28646	3.93975e-06
ENSG00000106804.6	C5	-0.416841	1.76968e-06
ENSG00000134830.3	C5AR2	-1.99605	0.0315558
ENSG00000113583.6	C5orf15	-0.430797	1.19875e-07
ENSG00000082213.13	C5orf22	-0.316375	0.000241564
ENSG00000181904.8	C5orf24	0.385635	1.11088e-08
ENSG00000151881.10	C5orf28	-0.169855	0.0200187
ENSG00000161010.10	C5orf45	0.345951	2.62652e-08
ENSG00000205765.4	C5orf51	-0.545774	6.09052e-13
ENSG00000221886.3	C5orf54	0.266458	0.0444243
ENSG00000221990.2	C5orf55	0.920327	4.36068e-12
ENSG00000197536.6	C5orf56	0.604803	5.34742e-12
ENSG00000186577.7	C6orf1	0.404884	5.23187e-10
ENSG00000196821.5	C6orf106	-0.658754	2.38269e-67
ENSG00000185127.5	C6orf120	0.680976	4.26302e-36
ENSG00000204564.7	C6orf136	0.768277	8.46394e-23
ENSG00000146476.6	C6orf211	-0.644558	6.17388e-12
ENSG00000221821.2	C6orf226	1.25482	2.29651e-27
ENSG00000204420.4	C6orf25	2.86572	1.0955e-14
ENSG00000204439.3	C6orf47	-0.235279	0.00804753
ENSG00000204387.8	C6orf48	-0.435627	2.02569e-25
ENSG00000137434.7	C6orf52	0.773695	0.0016221
ENSG00000154079.5	C6orf57	0.28969	0.00246239
ENSG00000112308.8	C6orf62	0.158724	1.17335e-05
ENSG00000198663.12	C6orf89	-0.488375	1.01772e-27
ENSG00000203711.7	C6orf99	1.11212	1.11103e-20
ENSG00000244291.1	C7orf13	0.82129	0.00293002
ENSG00000136197.8	C7orf25	0.935747	2.84416e-05
ENSG00000146576.8	C7orf26	-0.415985	4.93978e-09
ENSG00000153790.7	C7orf31	0.58748	5.72132e-06
ENSG00000180354.11	C7orf41	1.05637	5.73203e-15
ENSG00000146826.10	C7orf43	0.617719	2.61654e-31
ENSG00000146540.10	C7orf50	-0.142941	2.4528e-06
ENSG00000164898.8	C7orf55	0.64512	0.000113962
ENSG00000146963.13	C7orf55-LUC7L2	-0.489547	2.2182e-40
ENSG00000164603.7	C7orf60	-0.489261	1.12478e-11
ENSG00000185955.4	C7orf61	1.24501	0.00158303
ENSG00000176919.7	C8G	1.08693	1.3074e-05
ENSG00000184608.4	C8orf12	-0.922781	6.42202e-64
ENSG00000169085.7	C8orf46	1.12774	0.0305036
ENSG00000189376.7	C8orf76	0.817553	1.06215e-08
ENSG00000213563.2	C8orf82	0.186459	0.0372383
ENSG00000198917.7	C9orf114	0.305889	1.23066e-07
ENSG00000160345.8	C9orf116	1.1637	0.000306281
ENSG00000160401.10	C9orf117	0.954756	0.000387167
ENSG00000174038.8	C9orf131	0.738872	0.0459939
ENSG00000230185.4	C9orf147	1.44697	4.93957e-59
ENSG00000171159.4	C9orf16	0.395301	3.4688e-14
ENSG00000196366.1	C9orf163	0.610624	6.67341e-08
ENSG00000197191.3	C9orf169	0.883711	6.01302e-08
ENSG00000232434.1	C9orf172	1.69372	2.93744e-16
ENSG00000197768.6	C9orf173	1.08244	2.16927e-09
ENSG00000164972.8	C9orf24	0.842378	0.000320716
ENSG00000148120.10	C9orf3	0.372229	0.000141386
ENSG00000203993.3	C9orf37	0.199809	0.00154168
ENSG00000135045.6	C9orf40	-0.143429	0.00207
ENSG00000157653.7	C9orf43	0.862616	5.72923e-07
ENSG00000183784.5	C9orf66	0.971235	8.79449e-10
ENSG00000238227.3	C9orf69	-0.458671	1.13083e-15
ENSG00000147894.10	C9orf72	-0.421953	1.38915e-05
ENSG00000155621.10	C9orf85	-0.64955	4.92251e-11
ENSG00000165698.11	C9orf9	-0.570061	0.0422729
ENSG00000157693.10	C9orf91	-0.287671	4.95307e-05
ENSG00000185015.3	CA13	0.423584	0.000968124
ENSG00000118298.6	CA14	1.84035	4.91561e-25
ENSG00000178538.5	CA8	-6.41541	4.71907e-26
ENSG00000120159.7	CAAP1	0.156525	0.025265
ENSG00000102547.14	CAB39L	-0.608812	7.94877e-08
ENSG00000099991.12	CABIN1	0.41162	1.54996e-20
ENSG00000134508.8	CABLES1	0.597872	0.00023568
ENSG00000149679.7	CABLES2	0.83523	3.23427e-25
ENSG00000175544.9	CABP4	1.21735	1.39581e-08
ENSG00000160325.10	CACFD1	0.212826	0.0119253
ENSG00000151067.16	CACNA1C	2.14483	5.393e-06
ENSG00000006283.13	CACNA1G	1.20056	0.047075
ENSG00000151062.10	CACNA2D4	0.625923	7.46326e-05
ENSG00000067191.11	CACNB1	0.351317	3.67005e-06
ENSG00000167535.3	CACNB3	0.759668	2.86919e-23
ENSG00000105298.9	CACTIN	0.447821	1.46684e-15
ENSG00000151893.10	CACUL1	-0.182373	4.68208e-05
ENSG00000116161.13	CACYBP	-0.460638	7.56818e-17
ENSG00000105767.2	CADM4	0.979105	0.0128672
ENSG00000163618.13	CADPS	0.86158	1.09068e-95
ENSG00000164304.11	CAGE1	1.39361	1.00111e-10
ENSG00000175868.9	CALCB	1.02812	7.41309e-08
ENSG00000012822.11	CALCOCO1	0.787009	1.12843e-20
ENSG00000136436.10	CALCOCO2	-0.189084	2.10874e-05
ENSG00000064989.8	CALCRL	-0.838697	0.0254829
ENSG00000122786.15	CALD1	0.514804	0.0462488
ENSG00000138172.6	CALHM2	-0.631464	0.000672244
ENSG00000198668.6	CALM1	-0.0846521	0.030056
ENSG00000143933.12	CALM2	-0.250689	9.24827e-06
ENSG00000129007.10	CALML4	-0.407656	4.73706e-07
ENSG00000169885.5	CALML6	0.857563	0.00062839
ENSG00000179218.9	CALR	-0.156208	9.53928e-06
ENSG00000128595.12	CALU	-0.684816	8.24823e-42
ENSG00000130643.4	CALY	1.20478	0.000405928
ENSG00000134072.6	CAMK1	0.822383	0.018957
ENSG00000183049.8	CAMK1D	0.253941	0.00117938
ENSG00000058404.15	CAMK2B	1.48409	0.0420639
ENSG00000148660.16	CAMK2G	-0.306632	1.99293e-06
ENSG00000163888.3	CAMK2N2	1.66837	4.32712e-09
ENSG00000110931.14	CAMKK2	-0.315366	5.10776e-08
ENSG00000143919.10	CAMKMT	0.675328	1.52089e-17
ENSG00000164615.3	CAMLG	-0.342395	1.36773e-09
ENSG00000164047.3	CAMP	-1.16471	5.69716e-32
ENSG00000130559.14	CAMSAP1	-0.76724	1.04955e-91
ENSG00000118200.10	CAMSAP2	-0.353798	0.000152369
ENSG00000171735.14	CAMTA1	-0.394211	1.36264e-09
ENSG00000108509.16	CAMTA2	0.990318	4.36666e-30
ENSG00000111530.8	CAND1	-0.754521	2.57353e-66
ENSG00000144712.7	CAND2	0.81337	2.3321e-07
ENSG00000171302.12	CANT1	-0.507992	5.84615e-12
ENSG00000127022.10	CANX	-0.741017	5.14523e-69
ENSG00000131236.12	CAP1	-0.406968	1.15091e-16
ENSG00000014216.11	CAPN1	-0.267076	1.20044e-10
ENSG00000142330.15	CAPN10	0.517895	3.73881e-41
ENSG00000182472.4	CAPN12	0.734274	0.0156179
ENSG00000214711.5	CAPN14	-1.64718	5.4539e-06
ENSG00000149260.10	CAPN5	1.29237	0.0283002
ENSG00000131375.5	CAPN7	0.349152	1.57587e-12
ENSG00000126247.6	CAPNS1	-0.142703	0.0157507
ENSG00000135387.15	CAPRIN1	-0.310291	6.35807e-21
ENSG00000110888.13	CAPRIN2	0.699655	1.05261e-36
ENSG00000105519.8	CAPS	0.509509	1.59223e-09
ENSG00000116489.8	CAPZA1	-0.351197	2.63365e-12
ENSG00000198898.8	CAPZA2	-0.830884	3.20649e-49
ENSG00000198286.5	CARD11	0.140341	0.00010637
ENSG00000141527.12	CARD14	2.32476	4.49423e-06
ENSG00000187796.9	CARD9	1.30817	3.83842e-35
ENSG00000138380.13	CARF	0.745738	3.14681e-24
ENSG00000153048.6	CARHSP1	-0.363074	4.59819e-19
ENSG00000142453.7	CARM1	-0.143952	0.0191577
ENSG00000172508.6	CARNS1	1.35196	2.09238e-38
ENSG00000110619.12	CARS	-0.493614	4.7966e-29
ENSG00000118307.14	CASC1	1.68638	0.00275507
ENSG00000137812.15	CASC5	-0.643921	1.89275e-28
ENSG00000127995.12	CASD1	0.164872	0.00665899
ENSG00000147044.16	CASK	0.231441	2.85882e-05
ENSG00000167971.14	CASKIN1	2.44116	6.89982e-13
ENSG00000177303.5	CASKIN2	0.626586	0.035029
ENSG00000106144.15	CASP2	0.317666	2.95073e-09
ENSG00000164305.13	CASP3	-0.435812	4.64069e-14
ENSG00000138794.5	CASP6	-0.349629	0.00079251
ENSG00000165806.15	CASP7	-0.809292	9.56557e-28
ENSG00000087589.12	CASS4	1.19586	0.00011406
ENSG00000130940.10	CASZ1	0.690932	1.13862e-10
ENSG00000121691.4	CAT	-0.429677	9.46717e-13
ENSG00000166762.12	CATSPER2	1.09156	1.09525e-13
ENSG00000174898.11	CATSPERD	1.31098	1.50113e-05
ENSG00000099338.18	CATSPERG	1.2568	3.41186e-21
ENSG00000078699.17	CBFA2T2	0.296182	0.00392919
ENSG00000129993.10	CBFA2T3	1.06238	1.36694e-74
ENSG00000067955.9	CBFB	-0.205363	0.0438501
ENSG00000114423.14	CBLB	-0.183157	0.0258523
ENSG00000105879.7	CBLL1	-0.158221	0.00986553
ENSG00000139899.6	CBLN3	0.584128	2.02021e-08
ENSG00000160200.13	CBS	0.364526	9.55251e-29
ENSG00000172785.14	CBWD1	-0.340751	8.09456e-05
ENSG00000136682.10	CBWD2	0.499191	1.32132e-10
ENSG00000147996.12	CBWD5	0.283808	0.0138338
ENSG00000204790.8	CBWD6	-0.37337	0.0288231
ENSG00000108468.10	CBX1	-0.329541	2.04995e-10
ENSG00000173894.6	CBX2	-0.621783	2.94983e-37
ENSG00000122565.14	CBX3	-0.381315	6.12854e-15
ENSG00000100307.8	CBX7	0.639473	2.8766e-31
ENSG00000141570.6	CBX8	0.578852	6.74896e-18
ENSG00000204659.4	CBY3	0.535129	0.00940133
ENSG00000132024.13	CC2D1A	0.241976	2.42725e-05
ENSG00000154222.10	CC2D1B	0.449327	1.70732e-22
ENSG00000158941.12	CCAR2	0.103877	0.0189277
ENSG00000171097.9	CCBL1	0.197383	0.030206
ENSG00000137944.12	CCBL2	-0.485181	1.3274e-05
ENSG00000176476.4	CCDC101	-0.372092	2.34231e-05
ENSG00000163001.7	CCDC104	-0.715844	1.09588e-08
ENSG00000173581.3	CCDC106	0.253484	8.18874e-05
ENSG00000005059.11	CCDC109B	-0.317707	5.1831e-06
ENSG00000172361.5	CCDC11	1.00813	2.02693e-08
ENSG00000168491.5	CCDC110	-1.04512	7.90135e-34
ENSG00000164221.8	CCDC112	-1.12746	3.89523e-23
ENSG00000105479.11	CCDC114	0.534084	0.0148209
ENSG00000136710.5	CCDC115	0.136759	0.0282864
ENSG00000161180.6	CCDC116	1.94386	3.05558e-07
ENSG00000159873.5	CCDC117	-0.631295	1.92301e-31
ENSG00000147144.8	CCDC120	0.61746	0.0192142
ENSG00000151773.8	CCDC122	-0.487544	9.96033e-07
ENSG00000007080.6	CCDC124	-0.115415	0.0123796
ENSG00000183323.8	CCDC125	-0.345684	0.000855318
ENSG00000169193.7	CCDC126	-0.722522	4.16418e-08
ENSG00000104957.9	CCDC130	0.348658	5.24868e-14
ENSG00000004766.11	CCDC132	-0.577055	2.21127e-09
ENSG00000100147.9	CCDC134	0.449048	1.72027e-11
ENSG00000128596.12	CCDC136	0.858213	1.45414e-46
ENSG00000185298.8	CCDC137	0.200841	0.000196348
ENSG00000175455.10	CCDC14	0.521689	3.462e-17
ENSG00000163492.9	CCDC141	0.822457	2.24142e-33
ENSG00000135637.9	CCDC142	0.619415	6.00498e-24
ENSG00000170160.12	CCDC144A	1.96133	2.2617e-97
ENSG00000120051.10	CCDC147	0.556982	1.67705e-09
ENSG00000144395.13	CCDC150	0.725745	4.3986e-19
ENSG00000197599.8	CCDC154	1.959	2.29583e-16
ENSG00000161609.5	CCDC155	0.621216	0.00857208
ENSG00000183401.7	CCDC159	0.865584	9.00618e-21
ENSG00000255181.2	CCDC166	5.32471	9.7286e-05
ENSG00000198937.8	CCDC167	-0.842685	4.22302e-26
ENSG00000159588.10	CCDC17	0.763489	4.06495e-16
ENSG00000164989.11	CCDC171	0.342589	2.02403e-07
ENSG00000154781.11	CCDC174	0.225742	0.000239582
ENSG00000122483.13	CCDC18	0.272285	1.18235e-06
ENSG00000147419.12	CCDC25	-0.624649	1.21895e-16
ENSG00000162592.4	CCDC27	0.622976	0.0478392
ENSG00000024862.12	CCDC28A	-0.382966	1.08759e-07
ENSG00000160050.10	CCDC28B	-0.585496	2.70903e-16
ENSG00000109881.12	CCDC34	-0.487167	2.36739e-11
ENSG00000165972.8	CCDC38	1.30717	3.23856e-07
ENSG00000145075.7	CCDC39	0.328646	0.0143462
ENSG00000186710.7	CCDC42B	0.254932	4.77206e-07
ENSG00000180329.9	CCDC43	-0.967364	5.65531e-31
ENSG00000108588.9	CCDC47	-0.210058	0.00014172
ENSG00000164051.9	CCDC51	-1.02447	2.24312e-29
ENSG00000120860.6	CCDC53	-0.273609	0.00047895
ENSG00000176155.14	CCDC57	0.966343	1.38961e-66
ENSG00000160124.5	CCDC58	-0.529481	0.000216166
ENSG00000133773.7	CCDC59	-0.314152	2.64213e-05
ENSG00000108091.10	CCDC6	-0.336369	5.26721e-16
ENSG00000104983.4	CCDC61	0.63609	6.57183e-16
ENSG00000130783.9	CCDC62	1.04177	2.38649e-07
ENSG00000173093.8	CCDC63	3.12046	0.0409597
ENSG00000162069.10	CCDC64B	0.867118	0.000580492
ENSG00000139537.6	CCDC65	0.987994	0.000799145
ENSG00000198624.8	CCDC69	0.226252	3.07687e-17
ENSG00000177352.9	CCDC71	0.677096	1.57737e-17
ENSG00000253276.1	CCDC71L	0.151135	0.034838
ENSG00000163040.10	CCDC74A	0.935597	3.75201e-11
ENSG00000120647.5	CCDC77	-0.89289	4.22973e-21
ENSG00000162004.12	CCDC78	0.746358	4.28989e-26
ENSG00000249961.5	CCDC79	3.33021	0.0344003
ENSG00000149231.7	CCDC82	-0.149742	0.0373291
ENSG00000175602.2	CCDC85B	0.57374	1.50388e-20
ENSG00000110104.7	CCDC86	0.35557	0.000162731
ENSG00000115355.11	CCDC88A	0.172051	0.0063327
ENSG00000168071.17	CCDC88B	1.01604	2.06197e-66
ENSG00000015133.14	CCDC88C	-0.123137	0.000165022
ENSG00000105321.8	CCDC9	0.557943	1.77304e-14
ENSG00000123106.6	CCDC91	0.356277	0.000270636
ENSG00000119242.4	CCDC92	0.95263	3.73806e-08
ENSG00000125633.6	CCDC93	-0.35428	5.04448e-12
ENSG00000105248.11	CCDC94	-0.355166	3.88606e-05
ENSG00000173013.4	CCDC96	2.2162	1.18147e-45
ENSG00000142039.3	CCDC97	0.772833	1.98064e-36
ENSG00000204536.9	CCHCR1	0.452386	5.48139e-15
ENSG00000136280.11	CCM2	-0.921035	2.60634e-98
ENSG00000101331.11	CCM2L	1.13636	1.20662e-24
ENSG00000145386.5	CCNA2	-0.69666	2.16757e-43
ENSG00000134057.10	CCNB1	-0.675226	4.40223e-26
ENSG00000100814.13	CCNB1IP1	-0.595818	8.50374e-23
ENSG00000157456.3	CCNB2	-0.44878	6.97863e-16
ENSG00000112237.8	CCNC	-0.745989	5.6569e-21
ENSG00000110092.3	CCND1	0.580192	0.0230089
ENSG00000112576.8	CCND3	-0.758823	9.39423e-56
ENSG00000105173.9	CCNE1	0.155088	0.0446805
ENSG00000175305.12	CCNE2	0.519966	6.55445e-21
ENSG00000162063.8	CCNF	-0.512316	8.04206e-22
ENSG00000113328.14	CCNG1	-0.550821	8.39649e-14
ENSG00000138764.9	CCNG2	0.464448	1.20666e-26
ENSG00000118816.5	CCNI	0.0947561	0.0186551
ENSG00000090061.13	CCNK	0.6175	1.71171e-19
ENSG00000163660.7	CCNL1	0.817745	1.27074e-90
ENSG00000221978.7	CCNL2	0.91244	7.22537e-137
ENSG00000152669.8	CCNO	3.50267	7.60998e-07
ENSG00000129315.5	CCNT1	-1.14227	1.04192e-67
ENSG00000082258.8	CCNT2	0.299157	1.73371e-06
ENSG00000108100.13	CCNY	-0.17047	0.000333154
ENSG00000163249.5	CCNYL1	1.03664	9.5755e-62
ENSG00000103540.12	CCP110	-0.499297	5.46386e-13
ENSG00000260916.1	CCPG1	0.27498	0.000947833
ENSG00000184451.5	CCR10	0.815094	6.98974e-17
ENSG00000151014.4	CCRN4L	0.981481	1.49188e-20
ENSG00000173992.4	CCS	0.78393	5.60468e-44
ENSG00000154429.6	CCSAP	0.257188	7.76909e-05
ENSG00000107771.11	CCSER2	-0.451751	1.45553e-11
ENSG00000166226.8	CCT2	-0.826097	3.97413e-53
ENSG00000163468.10	CCT3	-0.678849	2.71835e-45
ENSG00000115484.10	CCT4	-0.506613	3.66983e-23
ENSG00000150753.7	CCT5	-0.784021	3.14973e-37
ENSG00000146731.6	CCT6A	-0.604418	4.45293e-30
ENSG00000132141.9	CCT6B	0.541136	4.27695e-05
ENSG00000135624.11	CCT7	-0.729166	1.36672e-63
ENSG00000156261.8	CCT8	-0.610608	4.08196e-32
ENSG00000122674.8	CCZ1	-0.459012	0.000147628
ENSG00000146574.11	CCZ1B	-0.264402	0.0205443
ENSG00000177697.13	CD151	2.41894	1.33303e-115
ENSG00000117281.11	CD160	1.29115	0.000229797
ENSG00000134061.4	CD180	-0.831449	8.60707e-12
ENSG00000177455.7	CD19	0.737987	2.73315e-103
ENSG00000158473.6	CD1D	0.74034	1.79637e-11
ENSG00000091972.14	CD200	-1.78627	0.00304537
ENSG00000012124.10	CD22	0.153805	3.4587e-07
ENSG00000174807.3	CD248	0.914939	0.00319284
ENSG00000139193.3	CD27	-0.340437	5.44122e-13
ENSG00000198087.7	CD2AP	0.100515	0.0348452
ENSG00000169217.4	CD2BP2	-0.272817	1.66445e-12
ENSG00000167775.6	CD320	-0.889528	4.39958e-46
ENSG00000104894.7	CD37	0.817748	8.95622e-69
ENSG00000004468.8	CD38	0.236252	8.0711e-16
ENSG00000101017.9	CD40	0.269953	2.89603e-09
ENSG00000117335.14	CD46	-0.352849	6.71366e-09
ENSG00000196776.10	CD47	-0.437049	5.22636e-14
ENSG00000117091.5	CD48	-0.923253	1.63595e-30
ENSG00000143119.8	CD53	-0.544336	9.65333e-24
ENSG00000085063.10	CD59	-0.254335	0.000104437
ENSG00000135404.7	CD63	-0.155119	0.0206273
ENSG00000110848.4	CD69	0.317958	0.00401594
ENSG00000125726.6	CD70	-0.176132	0.000156979
ENSG00000007312.8	CD79B	-0.667724	7.67905e-127
ENSG00000110651.7	CD81	-0.199147	2.91801e-06
ENSG00000085117.7	CD82	0.380889	4.77805e-06
ENSG00000112149.5	CD83	-0.218493	0.00331065
ENSG00000114013.11	CD86	-1.32142	3.49096e-19
ENSG00000153563.11	CD8A	3.63314	0.00869125
ENSG00000123146.15	CD97	-0.3171	0.000134192
ENSG00000102181.15	CD99L2	-0.907213	1.18587e-26
ENSG00000102543.10	CDADC1	0.589859	1.72421e-07
ENSG00000140326.8	CDAN1	0.365654	5.32849e-09
ENSG00000151465.9	CDC123	-0.834132	8.1691e-52
ENSG00000130177.10	CDC16	-0.368475	3.50456e-08
ENSG00000117399.9	CDC20	-0.193347	7.20578e-05
ENSG00000164287.8	CDC20B	2.66854	0.000127835
ENSG00000094880.6	CDC23	-0.81567	9.40035e-36
ENSG00000164045.7	CDC25A	-1.08536	7.88812e-118
ENSG00000101224.13	CDC25B	0.458315	3.79404e-18
ENSG00000158402.14	CDC25C	0.716265	6.24981e-28
ENSG00000176386.4	CDC26	-0.383546	0.00544509
ENSG00000004897.7	CDC27	-0.935539	3.63951e-53
ENSG00000105401.2	CDC37	0.490097	1.38424e-35
ENSG00000106993.7	CDC37L1	0.729326	5.99787e-19
ENSG00000168438.10	CDC40	-0.863006	9.96232e-27
ENSG00000070831.11	CDC42	-0.367193	1.85169e-10
ENSG00000198752.5	CDC42BPB	0.431394	0.0104087
ENSG00000171219.8	CDC42BPG	0.2188	0.0003072
ENSG00000163171.6	CDC42EP3	1.35437	0.000231134
ENSG00000167617.2	CDC42EP5	1.36753	0.00225433
ENSG00000197622.8	CDC42SE1	-0.967539	1.66092e-56
ENSG00000158985.9	CDC42SE2	-0.24782	2.27522e-06
ENSG00000093009.5	CDC45	-0.406081	1.07154e-15
ENSG00000096401.7	CDC5L	-0.829303	4.60212e-50
ENSG00000094804.5	CDC6	-0.699127	1.05502e-49
ENSG00000097046.8	CDC7	-0.690127	3.53895e-31
ENSG00000134371.9	CDC73	0.319964	1.82932e-07
ENSG00000184661.9	CDCA2	-0.428566	1.60205e-12
ENSG00000111665.7	CDCA3	0.122502	0.0141265
ENSG00000170779.10	CDCA4	-0.267334	4.81185e-09
ENSG00000146670.5	CDCA5	-1.04451	5.81539e-144
ENSG00000144354.9	CDCA7	-0.172396	5.66117e-05
ENSG00000164649.15	CDCA7L	-0.634499	3.31339e-32
ENSG00000107736.15	CDH23	0.759585	1.81846e-15
ENSG00000139880.15	CDH24	1.34045	6.79423e-19
ENSG00000074276.6	CDHR2	0.918861	4.85508e-15
ENSG00000128536.11	CDHR3	0.162865	0.0326319
ENSG00000187492.4	CDHR4	1.65316	0.0210549
ENSG00000099834.14	CDHR5	1.3472	1.35358e-19
ENSG00000103502.9	CDIPT	-0.116385	0.0293531
ENSG00000170312.11	CDK1	-0.510024	3.75783e-18
ENSG00000185324.17	CDK10	0.537285	3.77254e-28
ENSG00000008128.18	CDK11A	1.33747	9.23006e-27
ENSG00000248333.3	CDK11B	0.518968	4.59561e-16
ENSG00000167258.9	CDK12	0.502582	1.64966e-35
ENSG00000065883.10	CDK13	0.410908	1.01127e-44
ENSG00000102225.11	CDK16	0.179765	0.000142026
ENSG00000117266.11	CDK18	0.789913	1.07449e-13
ENSG00000155111.10	CDK19	0.140804	0.00127328
ENSG00000123374.6	CDK2	-0.583	4.51404e-21
ENSG00000111328.2	CDK2AP1	0.290535	0.000474728
ENSG00000167797.3	CDK2AP2	0.720314	9.69852e-54
ENSG00000135446.12	CDK4	-0.443703	3.21846e-21
ENSG00000164885.8	CDK5	-0.578062	3.27521e-10
ENSG00000101391.16	CDK5RAP1	-0.183753	0.000980735
ENSG00000136861.13	CDK5RAP2	-0.190478	8.01457e-07
ENSG00000108465.10	CDK5RAP3	0.464379	9.8799e-28
ENSG00000105810.5	CDK6	-0.783271	1.24706e-79
ENSG00000134058.6	CDK7	-0.589512	3.95162e-18
ENSG00000136807.7	CDK9	0.272435	3.96805e-08
ENSG00000006837.7	CDKL3	1.36355	6.00391e-17
ENSG00000008086.6	CDKL5	0.714426	8.21679e-05
ENSG00000124762.9	CDKN1A	0.810197	7.7854e-06
ENSG00000111276.6	CDKN1B	-0.312572	5.29588e-09
ENSG00000129757.8	CDKN1C	1.62376	1.19362e-12
ENSG00000147889.12	CDKN2A	0.606363	1.27286e-25
ENSG00000168564.5	CDKN2AIP	-0.135525	0.00371407
ENSG00000147883.9	CDKN2B	2.61451	9.26062e-224
ENSG00000123080.6	CDKN2C	0.260926	2.93188e-11
ENSG00000129355.6	CDKN2D	0.208014	0.000224481
ENSG00000100526.15	CDKN3	-0.381315	3.17858e-11
ENSG00000185267.5	CDNF	1.37769	1.3125e-16
ENSG00000140743.3	CDR2	-0.388514	2.19085e-11
ENSG00000101290.9	CDS2	-0.317471	8.33939e-15
ENSG00000167513.4	CDT1	0.147267	0.00488515
ENSG00000091527.11	CDV3	-0.432987	3.22233e-15
ENSG00000153046.13	CDYL	-0.283966	6.15963e-07
ENSG00000079385.17	CEACAM1	0.879163	0.0187014
ENSG00000007129.13	CEACAM21	-0.300489	0.00130802
ENSG00000172216.4	CEBPB	0.480306	0.00171055
ENSG00000221869.4	CEBPD	1.42867	0.0213548
ENSG00000153879.4	CEBPG	-0.344325	3.88888e-23
ENSG00000115816.9	CEBPZ	-0.685168	1.50038e-21
ENSG00000093072.11	CECR1	0.455787	1.53533e-22
ENSG00000069998.8	CECR5	-0.495855	2.79712e-15
ENSG00000170835.10	CEL	1.35582	5.0983e-09
ENSG00000149187.13	CELF1	-0.166049	2.51095e-05
ENSG00000075275.12	CELSR1	0.431452	2.66034e-09
ENSG00000143126.7	CELSR2	0.379295	1.79821e-06
ENSG00000008300.10	CELSR3	0.612116	2.23033e-20
ENSG00000184524.5	CEND1	-0.188948	0.00847648
ENSG00000177946.4	CENPBD1	0.471477	0.0120892
ENSG00000145241.6	CENPC	0.211245	0.000798544
ENSG00000138778.7	CENPE	-0.352142	9.49666e-07
ENSG00000117724.8	CENPF	-0.675054	2.20213e-46
ENSG00000153044.5	CENPH	-0.314259	1.6207e-05
ENSG00000102384.9	CENPI	0.157685	0.0387071
ENSG00000123219.8	CENPK	-0.507441	1.12341e-14
ENSG00000120334.11	CENPL	-0.579348	8.92206e-18
ENSG00000188312.9	CENPP	0.244021	0.00177565
ENSG00000031691.6	CENPQ	-0.63753	8.13121e-12
ENSG00000102901.8	CENPT	0.345065	7.70898e-15
ENSG00000203760.4	CENPW	-0.461921	5.7429e-07
ENSG00000116198.8	CEP104	0.254818	0.000278413
ENSG00000154240.12	CEP112	1.23553	6.26322e-13
ENSG00000100629.12	CEP128	1.06831	1.13587e-85
ENSG00000174799.6	CEP135	-0.210502	0.00288561
ENSG00000143702.11	CEP170	-0.236085	2.89203e-05
ENSG00000099814.11	CEP170B	0.861149	0.0178036
ENSG00000174007.7	CEP19	-0.717701	8.70076e-19
ENSG00000101639.14	CEP192	-0.191807	0.000273673
ENSG00000126001.11	CEP250	0.198264	0.00161397
ENSG00000198707.10	CEP290	-0.204308	0.00666178
ENSG00000135837.11	CEP350	-0.659404	2.77342e-32
ENSG00000106477.14	CEP41	-0.592432	1.23834e-18
ENSG00000164118.8	CEP44	-0.282192	2.94266e-06
ENSG00000138180.11	CEP55	-0.82791	1.08731e-22
ENSG00000166037.6	CEP57	-0.600979	2.85801e-29
ENSG00000183137.10	CEP57L1	-0.290596	0.00140597
ENSG00000182923.12	CEP63	-0.140547	0.0164924
ENSG00000112877.6	CEP72	0.555877	2.96256e-19
ENSG00000101624.6	CEP76	-0.639408	4.60786e-09
ENSG00000148019.8	CEP78	-0.298575	6.14941e-09
ENSG00000130695.9	CEP85	-0.18346	0.00421112
ENSG00000121289.13	CEP89	0.22335	0.00270879
ENSG00000258890.2	CEP95	-0.559264	1.37671e-15
ENSG00000182504.6	CEP97	-0.544558	8.41984e-14
ENSG00000134255.9	CEPT1	-0.488726	1.65198e-13
ENSG00000167123.14	CERCAM	1.3213	3.72373e-19
ENSG00000100422.9	CERK	-0.247012	5.88139e-10
ENSG00000188452.9	CERKL	-1.24876	4.0174e-18
ENSG00000143418.15	CERS2	-0.224697	0.00180665
ENSG00000090661.7	CERS4	0.51168	7.55671e-30
ENSG00000172831.7	CES2	0.529223	2.00257e-13
ENSG00000172828.8	CES3	-0.403503	0.00145083
ENSG00000172824.10	CES4A	0.647208	0.00138142
ENSG00000147400.8	CETN2	-0.421395	0.00882025
ENSG00000153140.4	CETN3	-0.579213	2.01241e-12
ENSG00000153774.4	CFDP1	0.180813	0.0289089
ENSG00000172757.8	CFL1	0.160622	0.00011309
ENSG00000003402.15	CFLAR	0.218116	2.14826e-08
ENSG00000126759.8	CFP	1.83641	2.9602e-06
ENSG00000163320.6	CGGBP1	-0.413323	2.37383e-18
ENSG00000100532.7	CGRRF1	-0.54283	1.89918e-07
ENSG00000128965.7	CHAC1	0.701512	2.83716e-80
ENSG00000143942.4	CHAC2	-0.920237	2.59866e-17
ENSG00000167670.11	CHAF1A	-0.203555	1.75943e-06
ENSG00000159259.7	CHAF1B	-0.787328	1.57581e-28
ENSG00000198824.4	CHAMP1	-0.506532	1.2334e-08
ENSG00000172586.7	CHCHD1	-0.385969	6.67473e-10
ENSG00000250479.4	CHCHD10	0.453849	0.0056609
ENSG00000106153.12	CHCHD2	-0.290755	5.11717e-09
ENSG00000106554.7	CHCHD3	-0.515504	1.56021e-27
ENSG00000163528.8	CHCHD4	-1.17753	7.42894e-31
ENSG00000159685.6	CHCHD6	-0.437452	0.00898498
ENSG00000170791.13	CHCHD7	0.720379	4.10057e-66
ENSG00000153922.6	CHD1	-1.57813	6.07012e-48
ENSG00000131778.13	CHD1L	-0.499311	2.48442e-11
ENSG00000173575.14	CHD2	-0.433339	6.71893e-38
ENSG00000170004.12	CHD3	0.657462	1.70459e-22
ENSG00000171316.7	CHD7	-0.425286	5.92809e-29
ENSG00000100888.8	CHD8	-1.05972	3.5348e-142
ENSG00000177200.11	CHD9	-0.702444	1.08883e-41
ENSG00000183765.16	CHEK2	-0.469175	2.30915e-08
ENSG00000085872.10	CHERP	0.905047	1.6767e-34
ENSG00000072609.13	CHFR	0.182131	0.000121848
ENSG00000133048.8	CHI3L1	0.595496	0.00134646
ENSG00000064886.9	CHI3L2	-1.50122	4.02882e-16
ENSG00000204116.7	CHIC1	-0.449685	0.000289333
ENSG00000177830.13	CHID1	0.132137	0.0288075
ENSG00000133063.11	CHIT1	0.87088	4.70836e-17
ENSG00000110721.7	CHKA	0.310898	0.0346667
ENSG00000134121.5	CHL1	0.589795	0.0169599
ENSG00000188419.9	CHM	-0.200454	0.0426694
ENSG00000203668.1	CHML	-0.58676	2.92025e-15
ENSG00000131165.10	CHMP1A	-0.291705	5.10942e-08
ENSG00000255112.2	CHMP1B	0.551713	9.69245e-23
ENSG00000130724.4	CHMP2A	0.48882	6.74804e-15
ENSG00000083937.4	CHMP2B	-0.435905	5.76512e-08
ENSG00000254505.4	CHMP4A	1.26403	1.30016e-15
ENSG00000101421.3	CHMP4B	0.324741	3.83514e-19
ENSG00000086065.9	CHMP5	-0.527529	5.50414e-14
ENSG00000176108.5	CHMP6	1.1137	2.07496e-42
ENSG00000110172.7	CHORDC1	0.186459	0.00215177
ENSG00000187446.7	CHP1	-0.248608	1.63729e-06
ENSG00000123989.9	CHPF	0.23313	0.000598084
ENSG00000033100.10	CHPF2	0.415772	1.12128e-30
ENSG00000111666.6	CHPT1	0.170616	0.0487953
ENSG00000104472.5	CHRAC1	0.428875	1.23846e-09
ENSG00000090539.11	CHRD	2.32242	8.02109e-05
ENSG00000169684.9	CHRNA5	-0.592588	0.00819134
ENSG00000147434.4	CHRNA6	-0.833295	2.19217e-09
ENSG00000170175.6	CHRNB1	-0.994248	5.4539e-12
ENSG00000160716.4	CHRNB2	0.698418	1.33436e-05
ENSG00000196811.7	CHRNG	1.14391	6.2495e-15
ENSG00000115526.6	CHST10	-1.27646	2.53165e-55
ENSG00000169105.6	CHST14	0.454794	8.79448e-08
ENSG00000182022.13	CHST15	0.239565	3.3026e-08
ENSG00000140835.8	CHST4	-2.43943	8.03542e-29
ENSG00000147119.3	CHST7	0.236413	0.00883244
ENSG00000131873.5	CHSY1	-0.454476	2.07285e-08
ENSG00000127586.12	CHTF18	0.780309	2.89384e-62
ENSG00000168802.8	CHTF8	-1.30856	2.00608e-97
ENSG00000160679.8	CHTOP	-1.00014	5.22019e-44
ENSG00000213341.6	CHUK	-0.765185	5.58337e-31
ENSG00000258289.3	CHURC1	-0.225183	0.000386633
ENSG00000144021.2	CIAO1	-0.260741	1.1813e-07
ENSG00000005194.10	CIAPIN1	-1.07725	4.35888e-36
ENSG00000185043.6	CIB1	-0.257542	0.00142505
ENSG00000079432.3	CIC	0.8832	1.93204e-38
ENSG00000179583.13	CIITA	0.863694	2.0983e-42
ENSG00000160161.5	CILP2	1.42803	0.00229683
ENSG00000100865.10	CINP	-0.490424	4.17393e-12
ENSG00000138433.11	CIR1	-0.916825	1.04275e-17
ENSG00000141076.13	CIRH1A	-0.681106	6.22866e-21
ENSG00000122873.7	CISD1	-0.379474	6.32523e-08
ENSG00000145354.5	CISD2	-0.25243	2.51671e-05
ENSG00000114737.11	CISH	1.33619	0.0353844
ENSG00000122966.9	CIT	0.350786	7.08744e-19
ENSG00000164442.8	CITED2	1.50267	1.11553e-143
ENSG00000179862.5	CITED4	2.23344	0.0102071
ENSG00000148337.15	CIZ1	0.704342	1.68176e-20
ENSG00000136108.10	CKAP2	-0.693292	4.35442e-38
ENSG00000169607.8	CKAP2L	-0.688167	1.2744e-32
ENSG00000136026.9	CKAP4	-0.990536	1.45737e-38
ENSG00000175216.10	CKAP5	-0.750091	1.30688e-57
ENSG00000166165.8	CKB	-0.33882	0.00050357
ENSG00000217555.8	CKLF	-0.665197	1.30809e-09
ENSG00000173207.8	CKS1B	-0.435987	1.07559e-33
ENSG00000123975.4	CKS2	-0.401197	9.74871e-20
ENSG00000074054.13	CLASP1	-0.265405	1.87228e-10
ENSG00000104859.10	CLASRP	0.36937	4.69393e-12
ENSG00000175505.9	CLCF1	1.22821	0.0185984
ENSG00000114859.10	CLCN2	1.58353	1.77166e-40
ENSG00000109572.9	CLCN3	-0.782236	6.15994e-62
ENSG00000073464.7	CLCN4	-0.841257	4.19752e-24
ENSG00000171365.11	CLCN5	-0.454657	1.88812e-06
ENSG00000011021.17	CLCN6	0.653692	7.61716e-12
ENSG00000103249.13	CLCN7	0.589678	1.27286e-39
ENSG00000013297.6	CLDN11	2.55646	1.94842e-06
ENSG00000157224.11	CLDN12	-0.861279	1.04773e-07
ENSG00000106404.9	CLDN15	0.242519	0.00167457
ENSG00000184113.8	CLDN5	0.660826	0.00877685
ENSG00000181885.14	CLDN7	1.80112	1.9672e-10
ENSG00000213937.3	CLDN9	2.17447	2.42475e-07
ENSG00000080822.12	CLDND1	-0.19871	0.0162032
ENSG00000160318.2	CLDND2	0.887568	1.14228e-10
ENSG00000038532.10	CLEC16A	0.356598	4.23433e-15
ENSG00000187912.7	CLEC17A	1.0368	0.00127658
ENSG00000140839.7	CLEC18B	1.75986	0.00015616
ENSG00000069493.10	CLEC2D	-0.380967	2.65408e-09
ENSG00000184293.3	CLECL1	-0.885079	1.70764e-07
ENSG00000213719.4	CLIC1	-0.555951	2.79298e-30
ENSG00000169583.12	CLIC3	1.81952	2.96759e-13
ENSG00000169504.10	CLIC4	-0.23288	1.5318e-05
ENSG00000113282.9	CLINT1	-0.38096	1.26558e-18
ENSG00000106665.11	CLIP2	0.338748	0.000208688
ENSG00000105270.10	CLIP3	1.0149	3.93697e-18
ENSG00000176444.14	CLK2	0.718641	3.85646e-50
ENSG00000165959.7	CLMN	-1.45906	8.35018e-05
ENSG00000128973.7	CLN6	-0.461374	1.24237e-19
ENSG00000182372.6	CLN8	1.0622	3.69975e-37
ENSG00000074201.4	CLNS1A	-0.51692	2.63554e-17
ENSG00000134852.10	CLOCK	-0.261633	0.0161831
ENSG00000162129.8	CLPB	-0.582467	5.69656e-17
ENSG00000125656.4	CLPP	-0.300913	1.14566e-08
ENSG00000104853.11	CLPTM1	0.230699	0.00755029
ENSG00000049656.9	CLPTM1L	-0.329069	2.63884e-17
ENSG00000166855.5	CLPX	-0.304577	1.27088e-06
ENSG00000092853.9	CLSPN	-0.453852	2.65146e-27
ENSG00000139182.9	CLSTN3	0.398871	1.01613e-10
ENSG00000122705.12	CLTA	-0.209973	1.23066e-06
ENSG00000175416.8	CLTB	0.208456	0.000926754
ENSG00000141367.7	CLTC	-0.635329	1.2145e-45
ENSG00000070371.11	CLTCL1	-0.559949	1.15876e-08
ENSG00000120885.15	CLU	0.772744	6.33885e-06
ENSG00000125246.11	CLYBL	0.551148	7.45216e-08
ENSG00000111726.8	CMAS	-0.383148	1.27088e-06
ENSG00000187118.8	CMC1	-0.410289	1.13198e-06
ENSG00000103121.4	CMC2	-0.99509	5.0707e-32
ENSG00000153815.12	CMIP	0.66966	1.1035e-20
ENSG00000162368.9	CMPK1	-0.461431	3.47108e-16
ENSG00000184220.6	CMSS1	-0.229506	0.000624915
ENSG00000091317.7	CMTM6	-0.651074	6.16557e-18
ENSG00000137200.8	CMTR1	-0.308209	5.30531e-15
ENSG00000180917.12	CMTR2	-0.610255	3.75045e-14
ENSG00000176571.7	CNBD1	0.715524	1.65371e-05
ENSG00000169714.12	CNBP	-0.536225	2.15041e-29
ENSG00000150656.10	CNDP1	3.76294	0.00585438
ENSG00000133313.10	CNDP2	0.377513	1.38021e-06
ENSG00000205423.7	CNEP1R1	0.193374	0.0302843
ENSG00000132259.8	CNGA4	1.37173	0.0361912
ENSG00000100528.7	CNIH1	-0.469868	5.59432e-10
ENSG00000174871.6	CNIH2	2.08174	1.33547e-30
ENSG00000143786.3	CNIH3	1.18521	1.80383e-18
ENSG00000143771.7	CNIH4	-0.217948	0.000636734
ENSG00000142675.13	CNKSR1	0.412832	0.0321929
ENSG00000130176.3	CNN1	2.83751	2.33866e-05
ENSG00000064666.10	CNN2	0.266784	2.11572e-05
ENSG00000148842.13	CNNM2	0.608788	3.69819e-26
ENSG00000168763.11	CNNM3	0.577036	1.60552e-07
ENSG00000158158.7	CNNM4	1.41541	6.61558e-107
ENSG00000125107.12	CNOT1	-0.725523	1.86197e-109
ENSG00000182973.14	CNOT10	-0.427404	4.69574e-19
ENSG00000111596.7	CNOT2	-0.586998	1.60464e-24
ENSG00000088038.13	CNOT3	0.881837	7.97034e-52
ENSG00000080802.14	CNOT4	0.362893	6.39018e-10
ENSG00000138767.8	CNOT6L	-0.670677	7.1236e-29
ENSG00000198791.7	CNOT7	-0.756821	9.76381e-26
ENSG00000155508.9	CNOT8	-1.03197	8.57678e-46
ENSG00000173786.12	CNP	0.209297	1.33298e-05
ENSG00000257727.1	CNPY2	0.323316	0.00275528
ENSG00000137161.12	CNPY3	0.161567	0.000431233
ENSG00000166997.3	CNPY4	-0.284397	0.0203435
ENSG00000118432.11	CNR1	0.214783	2.51938e-10
ENSG00000188822.6	CNR2	0.418492	2.3126e-08
ENSG00000162852.9	CNST	-0.687402	9.25287e-31
ENSG00000176563.5	CNTD1	1.18791	0.00500061
ENSG00000105219.4	CNTD2	2.75621	5.52935e-05
ENSG00000242689.1	CNTF	-0.833451	0.00921463
ENSG00000044459.10	CNTLN	0.458086	1.22982e-08
ENSG00000144619.10	CNTN4	2.29939	0.045901
ENSG00000108797.7	CNTNAP1	0.288681	0.0102002
ENSG00000174469.13	CNTNAP2	-1.56592	7.46943e-07
ENSG00000152910.14	CNTNAP4	-3.82468	1.11688e-20
ENSG00000119397.12	CNTRL	-0.220591	1.34619e-08
ENSG00000170037.9	CNTROB	0.212251	0.00141008
ENSG00000106603.13	COA1	-0.420131	4.77594e-15
ENSG00000183978.7	COA3	-0.579393	2.74539e-14
ENSG00000181924.6	COA4	-0.229933	0.00391963
ENSG00000183513.4	COA5	0.251499	0.00052109
ENSG00000168275.10	COA6	-0.419906	1.78387e-06
ENSG00000068120.10	COASY	0.260572	2.1533e-05
ENSG00000082438.11	COBLL1	-0.461318	8.33171e-11
ENSG00000100473.11	COCH	0.306728	4.37461e-09
ENSG00000166685.7	COG1	0.418345	3.07928e-10
ENSG00000135775.9	COG2	-1.03843	5.22e-46
ENSG00000136152.10	COG3	-0.180561	2.88962e-06
ENSG00000103051.14	COG4	-0.312364	6.22682e-11
ENSG00000164597.9	COG5	0.255646	0.000128793
ENSG00000133103.12	COG6	-0.191257	0.028009
ENSG00000168434.8	COG7	0.209635	0.0399943
ENSG00000213380.9	COG8	0.363806	4.47896e-09
ENSG00000121058.4	COIL	-1.05185	3.69347e-28
ENSG00000204248.6	COL11A2	1.8034	3.24169e-25
ENSG00000084636.13	COL16A1	1.78913	0.0258708
ENSG00000182871.10	COL18A1	0.544508	0.0267282
ENSG00000101203.12	COL20A1	2.24517	1.10534e-06
ENSG00000139219.13	COL2A1	1.3521	0.000847855
ENSG00000134871.13	COL4A2	1.01633	1.64991e-10
ENSG00000169031.14	COL4A3	1.0092	1.45773e-60
ENSG00000081052.10	COL4A4	0.587638	5.51673e-23
ENSG00000114270.11	COL7A1	2.04549	8.27037e-44
ENSG00000171812.6	COL8A2	2.32006	1.785e-15
ENSG00000092758.11	COL9A3	-0.223526	0.040107
ENSG00000118004.13	COLEC11	3.04086	0.00207544
ENSG00000130309.6	COLGALT1	0.266523	3.8151e-06
ENSG00000206561.8	COLQ	1.61146	0.000166784
ENSG00000145781.4	COMMD10	0.560083	5.02501e-09
ENSG00000114744.4	COMMD2	-0.347019	7.7786e-07
ENSG00000140365.11	COMMD4	-0.18287	0.0021158
ENSG00000170619.8	COMMD5	0.437953	1.39618e-10
ENSG00000188243.8	COMMD6	-0.233801	0.000173412
ENSG00000169019.9	COMMD8	-0.689123	3.5757e-12
ENSG00000110442.7	COMMD9	-0.319287	0.0226214
ENSG00000093010.7	COMT	-0.134068	0.00197005
ENSG00000165644.6	COMTD1	-0.239201	6.95989e-06
ENSG00000122218.10	COPA	-0.230476	1.48117e-05
ENSG00000129083.8	COPB1	-0.774872	4.58877e-36
ENSG00000184432.5	COPB2	-0.669248	2.96088e-41
ENSG00000105669.8	COPE	-0.173022	5.27124e-05
ENSG00000181789.10	COPG1	-0.423967	2.84993e-26
ENSG00000158623.10	COPG2	-0.505804	5.56065e-07
ENSG00000172301.6	COPRS	-0.342553	0.000636859
ENSG00000166200.10	COPS2	-0.835559	4.84551e-27
ENSG00000141030.8	COPS3	-1.02937	1.81869e-37
ENSG00000138663.4	COPS4	-0.558452	1.23201e-10
ENSG00000121022.9	COPS5	-0.326279	2.49566e-10
ENSG00000168090.5	COPS6	0.442044	1.44578e-11
ENSG00000144524.13	COPS7B	0.1679	0.0100184
ENSG00000111481.5	COPZ1	-0.350393	8.53116e-13
ENSG00000135469.9	COQ10A	0.663962	7.94927e-20
ENSG00000115520.4	COQ10B	-0.378036	2.4376e-06
ENSG00000132423.6	COQ3	-0.813603	9.09312e-05
ENSG00000167113.6	COQ4	-0.128502	0.042005
ENSG00000110871.10	COQ5	0.232312	0.00991404
ENSG00000088682.9	COQ9	-0.57125	1.29614e-16
ENSG00000110880.6	CORO1C	-0.403267	2.56512e-21
ENSG00000106789.8	CORO2A	1.907	1.00241e-06
ENSG00000103647.8	CORO2B	-1.17762	6.93222e-19
ENSG00000167549.14	CORO6	0.657106	2.31642e-12
ENSG00000103187.6	COTL1	0.311225	4.12191e-08
ENSG00000006695.6	COX10	-0.51648	1.38903e-08
ENSG00000178449.4	COX14	-0.229869	0.00184461
ENSG00000014919.8	COX15	-0.323303	5.31906e-08
ENSG00000163626.12	COX18	0.167412	0.00491374
ENSG00000240230.1	COX19	-0.494222	2.98166e-15
ENSG00000203667.5	COX20	0.743602	1.02851e-17
ENSG00000111775.2	COX6A1	-0.445807	9.11331e-09
ENSG00000126267.4	COX6B1	-0.239299	5.39331e-05
ENSG00000160471.8	COX6B2	1.48261	2.23111e-05
ENSG00000164919.6	COX6C	-0.261718	0.000149706
ENSG00000161281.6	COX7A1	2.34012	6.04764e-08
ENSG00000112695.7	COX7A2	-0.275401	5.29113e-08
ENSG00000115944.10	COX7A2L	-0.407977	1.95205e-11
ENSG00000131174.4	COX7B	-0.405433	3.7212e-06
ENSG00000127184.6	COX7C	-0.250716	7.91959e-07
ENSG00000176340.3	COX8A	-0.408333	8.30808e-10
ENSG00000160111.8	CPAMD8	-1.01171	0.0146533
ENSG00000108582.7	CPD	-0.0953654	0.0280671
ENSG00000137449.11	CPEB2	0.94481	1.36819e-24
ENSG00000107864.10	CPEB3	0.686524	5.09963e-10
ENSG00000106034.13	CPED1	1.50093	2.22278e-10
ENSG00000135678.7	CPM	1.8317	7.83542e-07
ENSG00000214078.7	CPNE1	0.173492	0.000112896
ENSG00000140848.12	CPNE2	0.240444	1.36834e-06
ENSG00000085719.7	CPNE3	-0.325614	0.000361386
ENSG00000124772.7	CPNE5	0.601055	2.21765e-13
ENSG00000178773.10	CPNE7	1.33193	0.0430479
ENSG00000080819.2	CPOX	-0.274146	0.00391229
ENSG00000103381.7	CPPED1	-0.374903	9.91164e-08
ENSG00000071894.10	CPSF1	0.652829	2.10625e-53
ENSG00000165934.8	CPSF2	-0.702723	1.84036e-30
ENSG00000119203.9	CPSF3	-0.810113	7.76186e-52
ENSG00000127054.14	CPSF3L	0.256995	2.47206e-10
ENSG00000160917.10	CPSF4	-0.380915	3.38959e-13
ENSG00000149532.11	CPSF7	-0.214254	0.00500656
ENSG00000110090.8	CPT1A	-0.182572	0.0108415
ENSG00000169169.10	CPT1C	1.30735	0.00067649
ENSG00000157184.5	CPT2	-0.606851	2.15311e-12
ENSG00000117322.12	CR2	0.260842	0.0370951
ENSG00000143320.4	CRABP2	1.14524	0.0455209
ENSG00000007545.11	CRAMP1L	0.61525	2.28236e-09
ENSG00000095321.12	CRAT	0.873282	1.0081e-05
ENSG00000148204.7	CRB2	0.962907	9.85182e-07
ENSG00000113851.9	CRBN	-0.426048	1.04342e-08
ENSG00000241258.2	CRCP	-0.563438	8.54509e-15
ENSG00000118260.10	CREB1	-0.27267	1.41601e-10
ENSG00000107175.6	CREB3	-0.161637	0.0373434
ENSG00000182158.10	CREB3L2	-0.110721	0.00646726
ENSG00000060566.9	CREB3L3	3.34659	0.0397484
ENSG00000146592.12	CREB5	0.27718	4.10728e-05
ENSG00000005339.8	CREBBP	0.334116	0.000835812
ENSG00000111269.2	CREBL2	-0.577649	1.53449e-09
ENSG00000164463.8	CREBRF	0.339645	6.67231e-07
ENSG00000137504.9	CREBZF	0.627083	3.84625e-41
ENSG00000143162.7	CREG1	-0.328643	0.000129471
ENSG00000163703.13	CRELD1	0.585441	6.27079e-15
ENSG00000184164.10	CRELD2	0.631106	2.45477e-37
ENSG00000095794.15	CREM	0.408324	1.53471e-07
ENSG00000145708.6	CRHBP	1.13522	1.14294e-20
ENSG00000150938.5	CRIM1	0.123207	0.0396899
ENSG00000213145.5	CRIP1	2.0211	2.80762e-29
ENSG00000257341.1	CRIP1	1.50966	1.0258e-08
ENSG00000179979.7	CRIPAK	0.680426	1.55475e-05
ENSG00000119878.5	CRIPT	0.287008	0.00173258
ENSG00000167193.7	CRK	-0.598824	2.62611e-24
ENSG00000099942.8	CRKL	-0.657558	8.84795e-89
ENSG00000006016.6	CRLF1	0.633035	0.00805748
ENSG00000205755.6	CRLF2	0.88739	8.50745e-08
ENSG00000176390.10	CRLF3	-0.375633	1.55792e-14
ENSG00000101343.10	CRNKL1	-0.324316	1.90955e-06
ENSG00000058453.12	CROCC	0.800281	1.00801e-38
ENSG00000170275.10	CRTAP	0.259808	0.000779712
ENSG00000105662.11	CRTC1	0.948133	1.23077e-30
ENSG00000160741.12	CRTC2	0.239551	0.001775
ENSG00000160202.3	CRYAA	1.13349	0.00233852
ENSG00000080200.5	CRYBG3	-1.74527	4.52973e-08
ENSG00000233280.2	CRYBG3	-0.930077	1.08094e-05
ENSG00000103316.6	CRYM	1.36436	0.00190082
ENSG00000205758.7	CRYZL1	0.688982	3.03322e-22
ENSG00000062485.14	CS	-0.408817	3.54604e-21
ENSG00000139631.14	CSAD	1.049	2.55354e-49
ENSG00000172346.10	CSDC2	2.52807	6.8595e-17
ENSG00000009307.11	CSDE1	-0.518491	4.99312e-29
ENSG00000124207.12	CSE1L	-1.05367	4.93746e-65
ENSG00000100368.9	CSF2RB	-0.410055	8.03457e-48
ENSG00000169826.6	CSGALNACT2	0.179215	0.00839976
ENSG00000183117.13	CSMD1	-3.05467	0.0112245
ENSG00000141551.10	CSNK1D	0.421853	4.99875e-14
ENSG00000213923.6	CSNK1E	0.322575	6.90807e-11
ENSG00000169118.11	CSNK1G1	-1.16814	1.82325e-37
ENSG00000133275.11	CSNK1G2	0.314661	6.24328e-19
ENSG00000151292.13	CSNK1G3	-0.616833	5.53735e-24
ENSG00000101266.12	CSNK2A1	-0.635195	3.92062e-45
ENSG00000070770.4	CSNK2A2	-0.505562	1.61892e-30
ENSG00000204435.9	CSNK2B	0.269393	0.00551846
ENSG00000173546.7	CSPG4	0.893183	0.0112305
ENSG00000144655.10	CSRNP1	0.152486	0.0255215
ENSG00000110925.2	CSRNP2	0.605163	9.42573e-17
ENSG00000159176.9	CSRP1	-0.361061	3.3735e-06
ENSG00000149474.9	CSRP2BP	-0.766453	5.86954e-14
ENSG00000160213.5	CSTB	0.169246	0.00763837
ENSG00000101138.7	CSTF1	-0.777023	1.72557e-42
ENSG00000101811.9	CSTF2	-0.251092	0.000372914
ENSG00000150527.12	CTAGE5	0.724633	4.99483e-15
ENSG00000271321.1	CTAGE6	3.76794	0.0140984
ENSG00000263264.1	CTB-133G6.1	0.294094	6.12586e-09
ENSG00000227450.2	CTB-58E17.5	1.38983	1.41569e-06
ENSG00000159692.11	CTBP1	0.145487	0.00133144
ENSG00000175029.12	CTBP2	0.77632	0.00347247
ENSG00000117151.8	CTBS	0.214399	0.00356354
ENSG00000245317.2	CTC-241N9.1	0.835679	3.80939e-11
ENSG00000224186.4	CTC-349C3.1	0.535933	0.0025683
ENSG00000262484.1	CTC-360G5.1	1.38669	1.17025e-05
ENSG00000261884.2	CTC-479C5.12	0.840154	2.33576e-12
ENSG00000178971.9	CTC1	0.584898	4.32818e-13
ENSG00000102974.10	CTCF	-0.70334	3.90766e-38
[truncated: 7,614 more rows]
