# Supplementary material for: MYC regulates ribosome biogenesis and mitochondrial gene expression programs through its interaction with host cell factor–1
Source: eLife. 2021 Jan 8;10:e60191. doi: 10.7554/eLife.60191 (PMC7793627; doi:10.7554/eLife.60191)
Supplement: Supplementary file 1. [file elife-60191-supp1.xlsx]

## Sheet: Sheet1
Primer name	Application	Source	Sequence
pCRIS-HCFC1N_F	Cloning	Sigma-Aldrich	TCTAGAATGCTGATGGGC
pCRIS_R	Cloning	Sigma-Aldrich	tactcggtcatggatccgggTATGTAACGCGGAACTCC
Puro-1	Cloning	Sigma-Aldrich	cccggatccATGACCGAGTACAAGCCC
Puro-FLAG_R	Cloning	Sigma-Aldrich	cttatcgtcgtcatccttgtaatcAGGTCCAGGGTTCTCCTC
FLAG-FKBP_F	Cloning	Sigma-Aldrich	gattacaaggatgacgacgataagGGAAGCGGAGGAGTGCAGG
FKBP_R	Cloning	Sigma-Aldrich	tagcccatcagcattctagaAGATCCGCCGCCACCCGA
pCRIS-HCFC1N_R	Cloning	Sigma-Aldrich	actgtcgagcgcctaggctcaagaaGGATCCGGGTATGTAACG
HCFC1N_F	Cloning	Sigma-Aldrich	TTCTTGAGCCTAGGCGCTCG
HCFC1N-5'Hom_R	Cloning	Sigma-Aldrich	tgttatcctcctcgcccttgctcacGTTGGCGGGCGACACGGC
mCherry_F	Cloning	Sigma-Aldrich	GTGAGCAAGGGCGAGGAG
mCherry_R	Cloning	Sigma-Aldrich	CTTGTACAGCTCGTCCAT
HCFC1-mCherry-FKBP_F	Cloning	Sigma-Aldrich	cggcggcatggacgagctgtacaagGGAAGCGGAGCTACTAACTTCAGCC
HCFC1-mCherry-FKBP_R	Cloning	Sigma-Aldrich	attagctggactgacagcgctggcAGATCCGCCGCCACCCGA
HCFC1N-3'Hom_F	Cloning	Sigma-Aldrich	gccagcgctgtcagtccagctaatTTGCCAGCGGTGCTTCTG
HCFC1N-3'Hom_R	Cloning	Sigma-Aldrich	tttgctagcccatcagcattctagaTCGGCGGATGTTAAACTCTG
HCFC1N-sgRNA_F	Cloning	Sigma-Aldrich	gctggcaagtGTTTTAGAGCTAGAAATAGCAAG
HCFC1N-sgRNA_R	Cloning	Sigma-Aldrich	ggtgcttctgGGTGTTTCGTCCTTTCCAC
4A_F	Cloning	Sigma-Aldrich	ggccgcATGTGTGGAGACGTGGCACCTC
4A_R	Cloning	Sigma-Aldrich	gccgcgGCAGCGCCTCCCTCCACTCG
VP16 HBM_F	Cloning	Sigma-Aldrich	gcgtatGCAGCGCCTCCCTCCACT
VP16 HBM_R	Cloning	Sigma-Aldrich	gtgctcATGTGTGGAGACGTGGCACC
GUIDE MYC-1A	Cloning	Sigma-Aldrich	cttgtgcgtaGTTTTAGAGCTAGAAATAGCAAG
GUIDE MYC-1B	Cloning	Sigma-Aldrich	agttccgtagCGGTGTTTCGTCCTTTC
H307G_F	Cloning	Sigma-Aldrich	gACACATCAGggCAACTACGCAGC
H307G_R	Cloning	Sigma-Aldrich	GACACGTGGCACCTCTTG
VP16 HBM H307G_F	Cloning	Sigma-Aldrich	gcgtatGCAGCGCCTCCCTCCACT
VP16 HBM H307G_R	Cloning	Sigma-Aldrich	gccctcATGTGTGGAGACGTGGCACC
5'_F	Southern blot	Sigma-Aldrich	CGATTTCGATTCCTCTGC
5'_R	Southern blot	Sigma-Aldrich	CCAGATCTGCTATCTCTCC
GFP_F	Southern blot	Sigma-Aldrich	gggCCATGGTGAGCAAGGG
GFP_R	Southern blot	Sigma-Aldrich	gggagatctGTACAGCTCGTCCATGC
T7-HCF1_F	Cloning	Sigma-Aldrich	tggccaacagatgggtCGCCATATGGAGCTCCTC
T7-HCF1_R	Cloning	Sigma-Aldrich	cctgtcatcgatgccatCCCTTCGATATGGTGATGG
E-box_F-biotin	EMSA	IDT	GCTCAGGGACCACGTGGTCGGGGATC-biotin
E-box_F	EMSA	IDT	GCTCAGGGACCACGTGGTCGGGGATC
E-box_R	EMSA	IDT	GATCCCCGACCACGTGGTCCCTGAGC
Mutant E-box_F	EMSA	IDT	GCTCAGGGACCAGCTGGTCGGGGATC
Mutant E-box_R	EMSA	IDT	GATCCCCGACCAGCTGGTCCCTGAGC
MYCP-4	gDNA qPCR	Sigma-Aldrich	AaGAaAAcGTgAAacGca
MYCP-5	gDNA qPCR	Sigma-Aldrich	gAGaGCgAAgAAGgatCtc
SNHG15_F	ChIP-qPCR	Sigma-Aldrich	CGCCACTGAACCCAATCC
SNHG15_R	ChIP-qPCR	Sigma-Aldrich	TCTAGTCATCCACCGCCATC
HBB-1	ChIP-qPCR	Sigma-Aldrich	GGCTGTCATCACTTAGACCTC
HBB-2	ChIP-qPCR	Sigma-Aldrich	GGTTGCTAGTGAACACAGTTG
EIF2S1_F	ChIP-qPCR	Sigma-Aldrich	TTCGTCCTTGTTCTCGGAGG
EIF2S1_R	ChIP-qPCR	Sigma-Aldrich	CGCAAGCGCTGAACGAATAG
EXOSC5_F	ChIP-qPCR	Sigma-Aldrich	TTTGGCGTCAGTATGCGTCT
EXOSC5_R	ChIP-qPCR	Sigma-Aldrich	CTGGTTACGCAGCCTGTTTG
UTP20_F	ChIP-qPCR	Sigma-Aldrich	ACACCTCACCCAAACGCC
UTP20_R	ChIP-qPCR	Sigma-Aldrich	GGGTCACGTGGACGGAAAA
POLR1A_F	ChIP-qPCR	Sigma-Aldrich	GTTCCACTCACCACCTGACT
POLR1A_R	ChIP-qPCR	Sigma-Aldrich	AAATGTCGTTCCTGCGACCG
EIF4G3-1	ChIP-qPCR; RT-qPCR	Sigma-Aldrich	CCTTTCACGGCAATATCCTC
EIF4G3-2	ChIP-qPCR; RT-qPCR	Sigma-Aldrich	TGAGTGAAGAAAATCCACCG
EXOSC5-1	RT-qPCR	Sigma-Aldrich	CTTCCTTCCTGCAAGGTGACA
EXOSC5-2	RT-qPCR	Sigma-Aldrich	AGGATCACTTCGAGTGTGGC
UTP20-1	RT-qPCR	Sigma-Aldrich	TCCGTGGATACCAGGTCCAT
UTP20-2	RT-qPCR	Sigma-Aldrich	TCCGACCTGCAGCTTATTGG
MARS2-1	RT-qPCR	Sigma-Aldrich	TCTCTCCTGGAGGACTTCGG
MARS2-2	RT-qPCR	Sigma-Aldrich	CATCACAAGCATCATCGCCG
EIF2S1-1	RT-qPCR	Sigma-Aldrich	AAGCATGCAGTCTCAGACCC
EIF2S1-2	RT-qPCR	Sigma-Aldrich	GTGGGGTCAAGCGCCTATTA
POLRMT-1	RT-qPCR	Sigma-Aldrich	GCTACAGGAAGGGCCTGAC
POLRMT-2	RT-qPCR	Sigma-Aldrich	CACACCTGGTTCATGACGGA
SUCLA2-1	RT-qPCR	Sigma-Aldrich	TGGTACGGTTACAAGGTACACG
SUCLA2-2	RT-qPCR	Sigma-Aldrich	TGCTTGCTTCGCTAAGGTCA
WDR3-1	RT-qPCR	Sigma-Aldrich	TATGATCAGCTAGGAGGCAG
WDR3-2	RT-qPCR	Sigma-Aldrich	CTTTCCCACTAGTAACTAGC
RRP9-1	RT-qPCR	Sigma-Aldrich	GACATTCGCGTTTTACGGGG
RRP9-2	RT-qPCR	Sigma-Aldrich	CACTCTCCACGCTCCACTTA
GAPDH-1	RT-qPCR	Sigma-Aldrich	AAGGTGAAGGTCGGAGTCAAC
GAPDH-2	RT-qPCR	Sigma-Aldrich	GTTGAGGTCAATGAAGGGGTC
