# Supplementary material for: MYC regulates ribosome biogenesis and mitochondrial gene expression programs through its interaction with host cell factor–1
Source: eLife. 2021 Jan 8;10:e60191. doi: 10.7554/eLife.60191 (PMC7793627; doi:10.7554/eLife.60191)
Supplement: Supplementary file 2. [file elife-60191-supp2.xlsx]

## Sheet: Sheet1
Experiment	Sample	Total Reads
Parental dTAG RNA-seq	DMSO rep1	45286657
Parental dTAG RNA-seq	DMSO rep2	42180049
Parental dTAG RNA-seq	DMSO rep3	46846258
Parental dTAG RNA-seq	dTAG rep1	51532685
Parental dTAG RNA-seq	dTAG rep2	51751441
Parental dTAG RNA-seq	dTAG rep3	48532954
FKBPFV-HCF-1N RNA-seq	DMSO rep1	137074323
FKBPFV-HCF-1N RNA-seq	DMSO rep2	97856532
FKBPFV-HCF-1N RNA-seq	DMSO rep3	98517439
FKBPFV-HCF-1N RNA-seq	dTAG rep1	97407294
FKBPFV-HCF-1N RNA-seq	dTAG rep2	66587719
FKBPFV-HCF-1N RNA-seq	dTAG rep3	83248853
Switchable MYC cells RNA-seq	WT rep1	45540235
Switchable MYC cells RNA-seq	WT rep2	43916750
Switchable MYC cells RNA-seq	WT rep3	45294510
Switchable MYC cells RNA-seq	4A rep1	51877019
Switchable MYC cells RNA-seq	4A rep2	47122065
Switchable MYC cells RNA-seq	4A rep3	41380579
Switchable MYC cells RNA-seq	VP16 HBM rep1	40905512
Switchable MYC cells RNA-seq	VP16 HBM rep2	44677502
Switchable MYC cells RNA-seq	VP16 HBM rep3	40651373
Tumor RNA-seq	WT rep1	52435549
Tumor RNA-seq	WT rep2	52282103
Tumor RNA-seq	WT rep3	52600096
Tumor RNA-seq	WT rep4	52173879
Tumor RNA-seq	4A1 rep1	52647667
Tumor RNA-seq	4A1 rep2	52816902
Tumor RNA-seq	4A1 rep3	52295999
Tumor RNA-seq	4A1 rep4	52908454
Tumor RNA-seq	4A2 rep1	52150641
Tumor RNA-seq	4A2 rep2	52678027
Tumor RNA-seq	4A2 rep3	52286744
Tumor RNA-seq	4A2 rep4	52314725
Tumor RNA-seq	delta264 rep1	52248487
Tumor RNA-seq	delta264 rep2	52798759
Tumor RNA-seq	delta264 rep3	52770341
Tumor RNA-seq	delta264 rep4	52681554
Switchable MYC cells HCF-1N ChIP-Seq	Parental IgG rep1	61857969
Switchable MYC cells HCF-1N ChIP-Seq	Parental IgG rep2	62287619
Switchable MYC cells HCF-1N ChIP-Seq	Parental IgG rep3	71279380
Switchable MYC cells HCF-1N ChIP-Seq	WT rep1	69241747
Switchable MYC cells HCF-1N ChIP-Seq	WT rep2	65745408
Switchable MYC cells HCF-1N ChIP-Seq	WT rep3	69388788
Switchable MYC cells HCF-1N ChIP-Seq	4A rep1	69785267
Switchable MYC cells HCF-1N ChIP-Seq	4A rep2	64115684
Switchable MYC cells HCF-1N ChIP-Seq	4A rep3	74811512
Switchable MYC cells HCF-1N ChIP-Seq	VP16 HBM rep1	62199784
Switchable MYC cells HCF-1N ChIP-Seq	VP16 HBM rep2	63942557
Switchable MYC cells HCF-1N ChIP-Seq	VP16 HBM rep3	64738443
Switchable MYC cells HA ChIP-Seq	Parental rep1	65083068
Switchable MYC cells HA ChIP-Seq	Parental rep2	65894596
Switchable MYC cells HA ChIP-Seq	Parental rep3	67616570
Switchable MYC cells HA ChIP-Seq	WT rep1	71303212
Switchable MYC cells HA ChIP-Seq	WT rep2	74829473
Switchable MYC cells HA ChIP-Seq	WT rep3	62868116
Switchable MYC cells HA ChIP-Seq	4A rep1	64784838
Switchable MYC cells HA ChIP-Seq	4A rep2	71217193
Switchable MYC cells HA ChIP-Seq	4A rep3	71209691
Switchable MYC cells HA ChIP-Seq	VP16 HBM rep1	75586322
Switchable MYC cells HA ChIP-Seq	VP16 HBM rep2	82572915
Switchable MYC cells HA ChIP-Seq	VP16 HBM rep3	55442880
